# Supplementary material for: CREBBP Inactivation Promotes the Development of HDAC3-Dependent Lymphomas
Source: Oxford University Press journal article supplement (doi:10.1158/2159-8290.cd-16-0975), 2016-10-12
Supplement: 21598290cd160975-sup-171123_1_supp_3697434_vvtv3d.xlsx [file 21598290cd160975-sup-171123_1_supp_3697434_vvtv3d.xlsx]

## Sheet: Table of pathways used in pathw
Supplementary Table S1: Pathways used in pathway enrichment analysis.
ABC_gt_GCB_Affy	ACP1	BATF	BCL2	CCND2	CSNK1E	ENTPD1	FUT8	GOT2	IGHG1	IL16	IRF4	MARCKS	PIM1	PIM2	PRKCB	PTPN1	SLA	SP140	SPIB	TCF4
ABC_gt_GCB_LC	BLNK	BMF	CCDC50	CCND2	ENTPD1	ETV6	FOXP1	FUT8	IL16	IRF4	PIM1	PTPN1	SH3BP5	TBC1D27
Adrenal_cortex_Node4284	ABCC3	AOX1	CYP11A1	CYP11B1	CYP11B2	CYP17A1	CYP21A2	DLK1	HOXA5	HSD3B2	KCTD14	NOV	SCARB1	SLC47A1	STAR	TBX3
HSA04612_ANTIGEN_PROCESSING_AND_PRESENTATION	KLRC4	HSP90AB1	IFNA21	KLRC2	KLRC3	CD8A	PDIA3	CD8B	LGMN	HLA-DMB	RFXANK	CANX	RFXAP	HLA-DMA	TAPBP	B2M	KLRD1	LTA	CIITA	HSP90AA1	HLA-A	HLA-C	HLA-A29.1	CTSS	HLA-B	HLA-E	HLA-DQA2	HLA-DQA1	HLA-G	HLA-F	PSME1	PSME2	KIR3DL3	HLA-DPA1	KIR2DL1	CTSB	KIR2DL3	KIR2DL2	KLRC1	KIR3DL1	KIR3DL2	HLA-DRA	KIR2DL4	HLA-DQB1	HLA-DQB2	KIR2DL5A	HLA-DRB1	HLA-DRB3	NFYC
BCL6_repressed	ATR	CCL3	CCND2	CD44	CD69	CD80	CDKN1A	CDKN1B	CXCL10	CXCR4	GPR183	ID2	IFITM1	IFITM3	IRF9	NFKB1	PRDM1	STAT1	TP53
BCL6_targets_CHIPCHIP	ABCA7	ACIN1	ACOT7	ACP2	ACP6	ACYP1	AFG3L2	AGPAT5	AIDA	ALG5	ALKBH2	ALOX5	AMN1	ANKRD28	ANKZF1	ANO8	AP3B1	AP4B1	APOL6	ARHGAP1	ARHGAP10	ARID1B	ARID3B	ARID4A	ARID5A	ARL2BP	ASB7	ATAD1	ATF4	ATG4C	ATG9A	ATP6V0B	ATP6V0E1	ATP8B3	ATXN7L2	AZI2	BAG1	BANF1	BAT2D1	BLZF1	BMPR2	BRPF1	BTD	BUD31	C10orf137	C10orf4	C10orf84	C12orf61	C14orf119
B_cell_Node1500	BLK	CD79A	CR2	MGC29506	MS4A1	POU2AF1	SPIB	TCL1A
B_cell_down_anergy	ACP5	EVI2B	FES	HCK	IFI30	VIM
B_cell_up_anergy	CCND2	CCT8	CD72	CD83	CRISP3	EGR1	EGR2	GFI1	LCK	MEF2C	NAB2	NRGN	PCP4	SATB1	TGIF1	TOMM40	UBE2H
Blimp_Bcell_repressed	AICDA	ALOX5	ARHGDIB	ATP2A3	BCL6	BLNK	BTK	CD180	CD19	CD22	CD24	CD27	CD37	CD52	CD53	CD74	CD79A	CD86	CIITA	CR2	CXCR5	DEK	EBF1	FCER1G	FCER2	FCRLA	GCET2	GPR18	HLA-DMB	HLA-DPA1	HLA-DPB1	HLA-DQA1	HLA-DRA	HLA-DRB1	IL16	INPP5D	IRF8	LRMP	LYN	MS4A1	MYBL1	MYO1E	NR1H2	PAG1	PAX5	PCDHGC3	PLEK	POU2AF1	POU2F2
Blimp_proliferation_repressed	ACTB	ACTG2	ACTL6A	ADSS	ANP32A	ARPC2	AURKA	BCKDHA	C6orf108	CDC123	CDC2	CDC20	CDC37	CDK2	CDKN2C	CHKA	CKS1B	CKS2	CLPP	CORO1A	CSK	CYFIP2	DAXX	DHFR	DNMT1	DUT	EIF2S2	EIF4EBP1	EXOSC5	FTH1	GMPS	GNAI2	GNAS	GNB1	GNB2	GOT2	GSK3A	GSTP1	HADH	HIF3A	IFI16	IKZF1	LCK	LCP1	LDHA	MAP2K1	MCM2	MCM4	MCM7
Blood_CD4+Tcell_gt_thymic_SP_CD4+Tcell	AIM1	AK5	BEX5	BST2	C1orf162	C20orf118	CD48	CEP68	CKAP4	CXCR4	DHRS7	DOCK9	EPPK1	EVI2B	FAM113B	FAM153B	FLJ43663	GBP5	GIMAP5	GIMAP8	IL10RA	IL11RA	IL6R	ISG20	KIAA0746	KLF3	LITAF	LOC439949	LRIG1	MAP3K5	MICA	NBPF8	NELL2	NFKBIZ	NPC2	NR3C2	PASK	PION	PLEKHA1	PRKCA	RASA3	RASGRF2	RNF157	RPL35A	SERPINB6	SH3BP5	SLC26A11	SLC39A10	SLC40A1
BreastCa_70gene_Bad	C16orf61	C20orf46	CCNE2	CDC42BPA	CENPA	COL4A2	DCK	DIAPH3	DTL	ECT2	EGLN1	ESM1	EXOC7	EXT1	FBXO31	FLT1	GMPS	GNAZ	GPR126	GPR180	HRASLS	IGFBP5	JHDM1D	LOC286052	LPCAT1	MCM6	MELK	MMP9	NDC80	NMU	NUSAP1	ORC6L	OXCT1	PALM2-AKAP2	PITRM1	PRC1	RAB6A	RFC4	SERF1A	SLC2A3	TMEFF1	TSPYL5
BreastCa_70gene_Good	ALDH4A1	AP2B1	BBC3	DHX58	EBF4	FGF18	GSTM3	MS4A7	PECI	SCUBE2	STK32B	TGFB3	WISP1
BreastCa_Bone_Metastasis	ADAMTS1	AOX1	C13orf15	CCDC68	CRADD	CTGF	CXCR4	DDX10	DUSP1	ENDOGL1	FARSA	FGF5	FHL1	FST	FYN	GTSE1	HIST1H2AC	HIST1H2BH	HIST2H2AA3	IL11	KHDRBS3	LRRC20	MCAM	MITF	MMP1	MRPS18B	NAP1L3	NCF2	NEDD4L	PCTK2	PFN2	PTK7	RMND5A	SAMD4A	SIX2	SLC4A7	SLC5A3	SOCS2	SOS1	SPAST	SRGN	ST3GAL6	TRMT1
CD40_downregulated_Burkitt_lymphoma	AIF1	ALDH5A1	AQP3	ARHGEF18	ARL4C	BCL6	BICD2	BIK	BLNK	BMP7	BTG2	C3orf37	CAMP	CD27	CD38	CDH17	CNR1	CRYZ	CSF2RB	CTDSP2	DFNA5	ELN	FAM106A	GCNT1	GPER	GRAP	HDAC9	HSD17B8	ID1	ID3	IGFBP6	IGJ	IRS1	ISG20	ITGB7	KCNN3	LETMD1	LMO3	LTB	MEF2B	NCF4	NCOR1	NINJ1	NPAS1	PALM2-AKAP2	PNOC	POLR2J2	POU2AF1	PRKAR2B
CD40_upregulated_Burkitt_lymphoma	ADAM8	ARHGEF2	ARID5B	BATF	BCL2	BCL2A1	CAPG	CCL22	CCL3	CCL4	CCR7	CD40	CD44	CD58	CD74	CD83	CFLAR	CHD1	CR2	CXCR5	DDIT4	DUSP2	ECOP	EHD1	ELL2	FDPSL2A	GADD45B	GPR183	HLA-DMB	HLA-DPB1	HLA-DQA1	HLA-DQB1	HLA-DRB1	HLA-F	HTR3A	ICAM1	ICOSLG	IER3	IFI30	IGHG1	IL1B	IL24	IRF4	IRF5	IRF9	JUNB	KCNN4	KRT7	LAPTM5
CD4_T_U133plus	C6orf105	FBXL16	PTPN13	ST6GALNAC1
CD8_T_U133plus	CD8A	CD8B	SMAD1
CD8_T_effectorDn_memoryDn_NaiveUp	ACTN1	AIF1	CD248	CEP170	DHRS3	FCHO1	HYAL2	IFNGR2	KCTD12	PLAG1	PTPN6	SNPH	USP44	ZNF510
CD8_T_effectorDn_memoryIm_NaiveUp	ARL4C	CCR7	CEP68	CTSC	DLL1	EPN2	FAM153B	FKBP5	GCA	GCH1	GNPDA1	GPR18	GUK1	HABP4	ITPKB	JAM3	LRRC8D	MAST4	MYC	NAP1L3	PDE3B	PDE9A	PECAM1	POLH	POU2F2	SELL	SNN	SOCS3	TMEM63A	ZNF204	ZNF223
CD8_T_effectorDn_memoryUp_NaiveUp	C12orf24	GZMK	IL7R	LIMS1	SMAD3	SMC4	TRAT1
CD8_T_effectorUp_memoryIm_NaiveDn	ACTN4	ACTR1A	ADRB2	ALB	APOBEC3B	BCR	CCL4	CEBPA	DERL1	EFHD2	FTSJD2	GZMH	H2AFX	HLA-DPA1	HRASLS3	IFI16	IL7R	KLRD1	LZTS1	MTM1	NFKBIA	OLFM1	RHOC	SH3BP5	SLC2A8	TCIRG1	TGFBR3	USP28	VCL
CD8_T_effectorUp_memoryUp_NaiveDn	ARHGDIA	ATG2A	BATF	CACNB3	CD58	CD74	DAPK3	EPHA4	FAM129A	GDE1	GGA2	GYG1	ITGB1	KIF22	KLRB1	OSBPL7	PEA15	PLCD1	PLXND1	PTGER2	PTPN7	RAB27A	SH2D2A	SH3KBP1	SLC1A5	SLC27A2	SLC38A6	SPAG1	TNIP2	TRIP4	WDR91
CLL_mutated_gt_CLL_unmutated	BANK1	CD274	CD82	EGR3	FCRL2	FCRL3	FGL2	FUT8	GEN1	MDFIC	PDLIM1	RASGRP1	SESN3	SLAMF1	SNED1	ZBTB20
CLL_unmutated_gt_CLL_mutated	APBB2	CASP3	CLEC2B	CRY1	DTX1	FKBP5	FLNB	GLO1	HIST2H2AA3	IFI44L	IL6ST	ITGB5	LPL	LTK	MSI2	MYLK	PFKP	RRBP1	TCL1A	TGFBR3	TPST2	VAMP5	WSB2	XBP1	ZAP70
CNS_Node1661	A2M	ABCA8	AKAP12	AMOTL2	ANK3	APOC1	APOD	APOE	CACNG4	CADM1	CAMSAP1L1	CDO1	CLU	CNN3	COLEC12	COX7A1	CRYAB	CSRP2	CTTN	CX3CL1	CXCL14	DDAH1	DDEF2	DDR1	DKK3	DMN	DPYSL3	DST	EFEMP1	EFHD1	EFS	ENTPD3	EPAS1	EPHX1	ERBB3	ETV5	FERMT2	FHL1	FLRT2	FRZB	FXYD1	FXYD6	FZD4	GJA1	GPC1	HSPA12A	HSPB8	HTRA1	ID4
CNS_PNS_Node1663	A2BP1	AAK1	ACCN1	ACTL6B	ADCY1	ADCY2	AGXT2L1	AK5	ALDOC	AMPH	ANK2	ANK3	APBA2	APC2	APLP1	AQP4	ARHGDIG	ARHGEF4	ARHGEF9	ARNT2	ARPP-19	ARPP-21	ASTN1	ATP1A2	ATP1A3	ATP1B2	ATP2B2	ATP6V1G2	ATP8A2	ATP9A	B3GAT1	BAALC	BAI2	BAI3	BCAN	BCAS1	BEX1	BSN	C16orf45	C1orf61	C1orf95	C20orf39	CA10	CA11	CABP1	CACNG3	CALM1	CALY	CAMK2A
CNSonly_Node1460	ATP13A2	ATP6V0E2	CALM1	CBX6	CLASP2	CLSTN1	DPYSL2	IDS	KIAA0513	MAPRE2	MOAP1	NDRG3	PEA15	PPP3CA	PPP3CB	PRKACB	RNF41	TUBA1A
Cell_cycle_Cho	ABCB1	ACOT2	ACTN1	AHNAK	ALPK2	AMBP	AMPD2	ANGPT1	ANKRD17	ANKRD36B	AP1M1	APOA1	ARF6	ARHGAP29	ARHGEF11	ARHGEF2	ARL5B	ARL6IP1	ARPC1B	ASGR1	ATAD2	ATF3	ATF4	ATP5C1	ATP6V1E1	AURKA	AVPR2	AZI2	BCL9	BLOC1S2	BMP2K	BMPR1A	BRIP1	BSCL2	BUB1	BUB3	C11orf58	C12orf11	C13orf33	C14orf4	C16orf35	C17orf91	C1orf27	C1orf56	C20orf3	C21orf59	C3orf1	C4orf18	C4orf8
Cell_cycle_Cho&Whitfield	ARL6IP1	ATAD2	AURKA	BUB1	BUB3	C11orf58	C9orf140	CAPN7	CASP3	CCNA2	CCNB1	CCNB2	CCND1	CCNF	CDC2	CDC20	CDC25A	CDCA7	CDCA8	CDKN2D	CENPA	CHAF1B	CKAP5	CKS1B	CKS2	CTSD	DLGAP5	DNAH11	DSPP	E2F5	FABP1	FAM64A	FAM83D	FOXM1	GMNN	GRPEL1	H1F0	H2AFX	HIST1H2AC	HIST1H4C	HMMR	IL10	JARID1B	KIAA1333	KIF11	KIF14	KIF23	KIF2C	KIFC1
Cell_cycle_Liu	ACPP	ADH4	AEN	AKIRIN2	ALKBH7	ANKRD10	ANLN	AOC3	APEX2	ARGLU1	ARL4A	ARL6IP1	ARL6IP2	ATAD2	AURKA	AURKB	BIRC5	BRD8	BRIP1	BUB1	BUB1B	BUB3	C11orf82	C13orf34	C14orf106	C14orf142	C16orf57	C20orf111	C20orf96	C5orf42	C9orf100	C9orf140	CALM2	CASP2	CASP3	CASP8AP2	CCDC90B	CCDC99	CCNA2	CCNB1	CCNB2	CCNE1	CCNE2	CCNF	CDC2	CDC25A	CDC25B	CDC27	CDC6
Cell_cycle_Whitfield	ABCA7	ABCC2	ABHD10	ACD	ACYP1	ADAMTS1	ADCY6	ADH4	AFAP1	AGK	AGPAT3	AHI1	AIFM2	AKAP13	AKIRIN2	AMD1	ANKRD10	ANKRD40	ANLN	ANP32B	ANP32E	ANTXR1	AOC2	AOC3	AP3D1	AP4B1	APEX2	ARGLU1	ARHGAP11A	ARHGAP19	ARHGDIB	ARL4A	ARL6IP1	ARL6IP2	ARMC1	ASF1A	ASF1B	ASPHD2	ASXL1	ATAD2	ATF7IP	ATRX	ATXN1L	AURKA	AURKB	BAG3	BAIAP2	BARD1	BBS2
DC_TLR4_TLR8_synergy	AREGB	BTG1	CDKN2B	CITED4	CLC	CSF2	CSF3	DEPDC7	DUSP2	EGR3	FOXF1	GFPT2	GNG2	GRAP	GSTA4	IL12A	IL1F9	IL23A	IL29	KISS1R	LAMC1	LIF	LOC387763	MGC16121	MMP10	MMRN2	OSR2	OXTR	PERP	RGS16	RHCG	TDH	TFPI2	TPBG	TSLP
Dendritic_cell_BDCA1pos_blood	ASGR2	C9orf165	CD163	CD1A	COL9A2	CSF3R	DHRS9	DTNA	FLJ10357	HBEGF	IL13RA1	IL1R2	IL1RN	IL27RA	LAYN	MICAL2	MPP7	NOS3	RTN1	SERINC5	SGMS2	SGSH	SLC2A3	TNFRSF10D	VCAN	VSIG4
Dendritic_cell_BDCA1pos_tonsil	FCGR2C	MTSS1	TREML1	VCAN
Dendritic_cell_BDCA3pos_blood	AP3M2	APOL1	APOL3	B3GNT7	BATF3	C13orf31	C1orf165	C1orf54	C8orf47	CADM1	CAMK2D	CCDC126	CCND1	CD59	CLCN4	CPNE3	CSRP1	CYP2E1	DGAT2	ENOX1	ENPP1	FARS2	FKBP1B	GAS2L3	GCET2	GPER	GPR126	GRAMD2	GRHL1	HLA-DOB	INDO	INDOL1	IRAK2	KIF16B	KIT	LIMA1	LOC100131989	MIST	MRC2	MTERFD3	MYLK	NCALD	NEDD4L	NET1	NMNAT3	NUBPL	PAM	PARP3	PAWR
Dendritic_cell_CD123pos_blood	ACSL3	ADC	AEBP1	AHI1	AKR1C3	ALDH5A1	ALOX5AP	AMIGO2	ANKRD36B	APBB1IP	APP	AQP3	ARHGAP24	ASIP	ASPH	ATP13A2	BCL11A	BIC	BLNK	BSPRY	BTG3	C10orf118	C10orf137	C10orf58	C11orf31	C13orf18	C17orf86	C20orf103	C5orf28	C5orf29	C6orf65	C7orf29	C7orf31	C7orf41	C8orf59	C9orf102	C9orf45	C9orf86	C9orf91	CARD11	CCDC50	CCR2	CD164	CD2AP	CD36	CDC14A	CDCA7L	CDH23	CDK5R1
Dendritic_cell_CD123pos_tonsil	AHI1	AKR1C3	C18orf1	C20orf103	C9orf86	COBLL1	COL24A1	DACH1	EPHA2	EPS8L2	FLNB	FZD3	GPM6B	IL3RA	ITM2C	KCNA5	KCNK10	LEPREL1	LHFPL2	LOC158402	PFKFB2	PTCRA	PTGDS	SCAMP5	SLC7A5	TNFRSF21	TOX2	VASH2	hCG_2024094
Dendritic_cell_CD16pos_blood	ADM	ARRB1	BCL2A1	BLVRA	CALML4	CDC42EP3	CLCF1	CLIP4	COTL1	EPB41L3	FCGR3B	FOXO1	GBP5	GPR137B	HMOX1	IL15	MARCKS	MRAS	MS4A7	MYO1G	NCRNA00084	NEFH	P2RY13	PFKFB4	PTGER2	RIN2	SAMD4A	SAT1	SERPINA1	SIGLEC10	SLA	SLC7A7	SMAD1	SPRED1	SRXN1	TCF7L2	TIAM1	TLR8	TUBA4A	UBASH3B	ULK2
E2F3_overexpression_2x_up	ABCG2	ABHD7	ALDH5A1	ANKRD18A	ATAD2	ATRNL1	BAI2	BCOR	BRI3BP	C12orf34	C20orf112	C22:CTA-250D10.9	C6orf168	CAMK2N1	CCNE1	CCNE2	CCNO	CD83	CDC20B	CDC2L6	CDKN1C	CDKN2C	CEBPA	CHML	CHST1	CHST2	CHST7	CMPK2	CP110	CRELD2	CRY1	CSPG5	DCK	DCLRE1B	DDAH1	DMN	DSCR6	DTL	E2F7	EEF1A2	ENO2	EPB41L4A	FAM119A	FAM92A1	FANCA	FEN1	FGF9	FGFR3	FLJ25076
E2F3_overexpression_4x_up	C12orf34	C6orf168	CCNE1	CCNE2	CD83	CDC20B	CDKN1C	CDKN2C	CEBPA	CMPK2	DMN	E2F7	ENO2	FGF9	FGFR3	FLJ25076	FLJ42562	GKAP1	HEY1	IL17RB	KISS1R	LOC116236	LYPD6	MMP15	MYB	NEFL	NR2F1	PEG10	PLCL2	RRAGD	SBK1	SCN8A	SMAD6	STRA13	TM6SF1	TMEM155	TMEM158	TMEM20	TPPP	ZDHHC23	ZNF367	ZNF483
Endothelial_precursor_GNF	A2M	APOE	APOL4	C1QB	C1QC	C4A	CCL18	CD5L	CHL1	CHRDL1	COL1A2	COL3A1	CP	CRH	CTGF	CXCL12	DYRK1A	ELTD1	ENPEP	EPAS1	FABP4	FGFR3	FN1	FRZB	FSTL1	GJA1	IGF2	IGFBP5	LCAT	LEPR	LPL	LTBP2	MUC1	NMU	NNMT	OLFML3	PDE2A	PPAP2B	PTMS	RAI14	RPS6KL1	SEPP1	SLC10A4	SYNGR1	TF	TNC	VCAM1
Epithelial_keritin_Node1641	DSP	KRT14	KRT15	KRT17	KRT4	KRT5	KRT6A	KRT6B	LYPD3	PERP	PKP1	S100A2	S100A7	SERPINB5	SFN	SPRR1A	SPRR1B	SPRR3	TRIM29
Epithelium_Node1413	ALDH1B1	ARL6IP2	CAMK2D	CDC5L	MEFV	MYH9	PNO1	SNW1	SPN	ZNF835
Epithelium_Node5693	CLCA2	CRCT1	DSC2	DSG1	IL1RN	KRT16	PTK6	SCEL	TGM1
Erythrocytic_Node1660	ALAS2	BZRPL1	CA1	EPB42	ERAF	GYPA	GYPB	HBD	HBQ1	KLF1	RHCE	RHD	SLC4A1	SPTA1
Erythroid_precursor_GNF	ABCB6	ABCC13	ABCG2	ACHE	ACP1	ACSL6	ADIPOR1	AKAP8L	AKIRIN2	ALAD	ALAS2	ALS2CR2	ANK1	ANKLE1	AQP1	ARF4	ARG1	ARHGEF12	ARL4A	ART4	ASCC2	ATG4A	ATP1B2	BAG1	BCL2L1	BMP2K	BNIP3L	BPGM	BSDC1	BSG	BZRPL1	C12orf51	C13orf15	C14orf68	C16orf35	C1orf128	C1orf177	C1orf91	C5orf4	CAT	CCNF	CCRL2	CCS	CDC27	CDC34	CDH11	CDRT1	CKM	CLCN3
Follicular_dendritic_cell	C4orf7	CLU	CXCL13	PRNP
Follicular_lymphoma_Immune_Response1	ACTN1	ATP8B2	BIN2	C1RL	C20orf112	CAMK1D	CD7	CD8B	DDEF2	FAM46A	FLNA	FLT3LG	FNIP2	GALNT12	GNAQ	HCST	IL7R	INPP1	ITK	JAM3	KIAA1128	LEF1	LGALS2	LOC150166	PMEPA1	PTRF	RAB27A	RALGDS	SEMA4C	SEPW1	SKI	STAT4	TBC1D4	TEAD1	TMEM173	TNFRSF1B	TNFRSF25	TNFSF12	TNFSF13B	TTC39B
Follicular_lymphoma_Immune_Response2	ANKRD57	BLVRA	C1QA	C1QB	C3AR1	C4A	C6orf145	DHRS3	DUSP3	F8	FCGR1A	GPRC5B	HERC5	HOXD8	LGMN	ME1	MITF	MRVI1	NDN	OASL	PELO	SCARB2	TLR5
G2_M_phase	ASPM	AURKA	AURKB	BIRC5	CENPF	PLK1
GCB_gt_ABC_Affy	BCL6	CSTB	FAM3C	ITPKB	LMO2	LRMP	MME	MYBL1	SPINK2	VCL
GCB_gt_ABC_LC	BCL6	DENND3	ITPKB	LMO2	LRMP	MME	MYBL1	NEK6	SAMD12	SERPINA9
GC_B_DLBCL_survival	BCL6	GCET2	SERPINA9
GC_B_cell_BL_equal_DLBCL	A4GALT	ABCA11P	ACTR2	AICDA	AIF1	ALPK1	ANUBL1	AP4S1	APLN	ARHGAP19	ARL17	ARL5B	ARSG	ATP8A1	BCAS4	BCL6	BFSP2	BICD1	BPTF	BRWD1	BTNL9	C13orf31	C1orf172	C20orf196	C4orf22	C4orf7	C7orf10	C9orf66	CAMK2B	CCDC126	CCDC147	CCDC23	CCDC69	CCNB2	CD180	CD27	CDC2L5	CECR7	CLLU1	CMPK2	COTL1	CR1L	CTPS2	DAAM1	DBNL	DCK	DDEFL1	DENND2D	DFNA5
GC_B_cell_BLhigh_DLBCLlow	ACY3	AFF2	ANK1	BCL7A	BMP7	BTN1A1	C3orf37	C4orf34	CADPS	CCDC88A	CD38	CTNNBIP1	CYP39A1	DNASE1	DOK3	FANCA	FHOD3	FLJ40330	GCET2	KIAA0922	LHFP	LOC285286	LOC730272	MME	NY-SAR-48	PEG10	PEX5	PRDM15	RNFT2	SSBP2	ST14	SUSD3	TNFSF8	VPREB3	XKR6	ZNF581
GC_B_cell_BLlow_DLBCLhigh	AIM2	ASB2	C21orf7	CD80	CD86	CLIC5	CLIP2	CLIP4	CR2	DCN	DENND1B	DHRS9	EHD3	EPSTI1	ETS1	FAM105B	FGD6	GDPD5	GSN	HECW2	HOPX	HSPA12A	ILDR1	KCNMA1	LMO2	LOXL2	LRCH3	MAML3	MET	MGC70870	NINJ2	PLXNB2	PTAFR	RRAS2	RSAD2	SERPINA9	SLC1A1	SLC4A8	SMPDL3A	SOCS1	SPAG16	SYTL4	TBC1D2	TEX9	TGM2	TIAM2	TMEM163	TNFSF10	TOX
GC_B_cell_U133Plus	A4GALT	ABCA11P	ACTR2	ACY3	AFF2	AICDA	AIF1	AIM2	ALPK1	ANK1	ANUBL1	AP4S1	APLN	ARHGAP19	ARL17	ARL5B	ARSG	ASB2	ATP8A1	BCAS4	BCL6	BCL7A	BFSP2	BICD1	BMP7	BPTF	BRWD1	BTN1A1	BTNL9	C13orf31	C1orf172	C20orf196	C21orf7	C3orf37	C4orf22	C4orf34	C4orf7	C7orf10	C9orf66	CADPS	CAMK2B	CCDC126	CCDC147	CCDC23	CCDC69	CCDC88A	CCNB2	CD180	CD27
GC_T_helper_down_Kim	ACSM2A	C10orf11	CLASP2	DHRS3	DOCK4	DUSP8	ELL2	FLJ43663	GARNL4	IRS2	LRRTM3	OSBP	PER1	PFTK1	RORA	RYBP	S1PR1	SH3D19	SPTBN1	SVIL	USP12	ZNF331
GC_T_helper_up2x_Chtanova	AACS	ABAT	ABCG1	AFF3	AKAP13	AKR1C2	AKR1C3	AMPD3	ANKRD13A	AP3S2	APBB1IP	ARID1B	ARRDC3	ASCL2	ATAD2B	ATG2B	ATP1B3	ATP8A1	BAZ2B	BCAT1	BCL6	BCL7B	BCL9L	BTG2	BTLA	C10orf104	C11orf54	C11orf65	C14orf145	C14orf4	C18orf1	C21orf57	C2CD2	C3orf21	C3orf37	C5orf41	C6orf204	C9orf16	C9orf164	CA8	CAMK2N1	CAMSAP1	CASD1	CASP4	CATSPERB	CAV1	CBX4	CCDC64	CCNYL1
GC_T_helper_up4x_Chtanova	AFF3	AKR1C2	AKR1C3	AMPD3	ASCL2	BAZ2B	BCL6	BCL7B	BCL9L	BTLA	C14orf145	C18orf1	C2CD2	C3orf21	C5orf41	CA8	CAMK2N1	CASP4	CATSPERB	CAV1	CD200	CD27	CD84	CDK5R1	CDKL2	CEBPA	CHGB	CHI3L2	CHMP7	CLEC7A	CNIH3	CTTN	CXCL13	CXCR5	CXXC5	DBH	DCBLD1	DDEF1	DKFZp781N1041	DUSP1	EFNB2	FAM134B	FAM3B	FAM43A	FAM91A2	FBLN7	FGFR2	FKBP5	FLJ31104
GC_T_helper_up_Chtanova_and_Kim	AMPD3	BCL6	CASD1	CHGB	CHI3L2	CXCL13	KSR2	NCKAP1	PHACTR2	PITPNC1	PON2	POU2AF1	PPP1CC	SH2D1A	STK39	TBC1D4	TOX	ZNF638
GC_T_helper_up_Kim	AMPD3	ANKRD11	AP1S2	BCL6	BRWD2	C12orf35	C17orf42	CASD1	CHGB	CHI3L2	CPSF2	CREBL2	CXCL13	DNAJB6	EGR2	ERMP1	ETS1	FEM1B	FLJ20160	HDHD1A	HIBCH	HPRT1	IQGAP1	KLHL6	KSR2	LZTFL1	MAN1A1	MDM4	MYH10	NCKAP1	NECAB1	NOS3	OSTM1	PAWR	PHACTR2	PITPNC1	PON2	POU2AF1	PPP1CC	PPP3CB	PRKACB	PRPF38B	RPS6KA3	RUFY1	SERF1A	SH2D1A	SLC25A46	SLC35F5	SNRPN
Germinal_center_Bcell_DLBCL	BCL6	BCL7A	C17orf60	C3orf37	C8orf80	CCNG2	CUX1	CYorf15A	DNAJC10	DTX1	ELOVL5	FAM102A	FAM113B	FLJ42418	GCET2	HDAC7	KATNAL1	KIAA0746	KLHL5	KLHL6	LOC100129447	LOC90925	LRMP	MAN2C1	MAP4K2	MAPK10	MAST2	MEF2B	MFHAS1	MME	MYBL1	OGG1	OSBPL3	PAG1	PCDHGC3	PIK3CG	PRPSAP2	PTK2	RAPGEF5	RGS13	RUNDC2B	SAMD12	SERPINA9	SFRS15	SLC1A1	SMARCB1	SORL1	SPRED2	STAP1
Glucose_starve_down	AAMP	ABO	ADCYAP1	ADNP	AGL	ARF4	ARHGEF6	ARPC5	ARTN	ASF1A	ATP2A2	ATP5J	ATP6V0B	AURKA	BAZ1A	BCL2	BFSP2	BMP1	C1orf77	CALM1	CAPZA1	CCNG1	CCT4	CD47	CD86	CDC2	CDC7	CLP1	COMT	CREM	DAPK2	DEK	DKK4	DNAJA1	DNAJB6	DPYSL2	DST	DVL3	DYRK1A	E2F1	E2F4	ECE2	EHD1	EIF1B	EIF2B4	EIF3H	EIF4H	ELL	ELMO1
Glucose_starve_up	AARS	ACD	ACTA1	ADA	ASNS	ATF5	BCAT2	C11orf80	C1orf61	C2orf27	CARS	CEBPB	CLCN6	CORO1A	CTTN	DRAP1	FKBP2	GART	GM2A	GPX6	HNRPDL	IDH2	IGHM	LTBR	MAP2K3	MFNG	MGST2	MS4A1	MS4A2	MYB	OCLN	PCK2	PLOD1	POU2F2	PRB4	PYCR1	SAPS2	SC4MOL	TCF20	TOMM40	UCKL1	UNC119	WARS
Glutamine_Glucose_starve_both_down	AATF	ACADVL	ACAT2	ACIN1	ACVRL1	ADA	ADRM1	AES	AHSA1	AK2	AKR7A2	ALDH2	ALDH4A1	AMD1	AP4M1	ARF1	ARHGAP1	ARID4B	ARL2BP	ARMET	ARPC3	ASCL1	ASNS	ASS1	ATF5	ATP1B3	ATP2A2	ATP2A3	ATP5G3	ATP6AP1	ATP6V0A2	ATP6V0C	ATP6V0E1	BASP1	BCAP31	BCKDHA	BCL6	BCL7A	BCS1L	BLOC1S1	BMP1	BNIP3L	BRD3	BRD8	BRF1	BTG2	BTK	BYSL	C1QBP
Glutamine_Glucose_starve_both_up	ACTA1	ADA	ASNS	ATF5	BCAT2	CARS	CEBPB	IDH2	PYCR1	WARS
Glutamine_starve_down	ABCF1	ACAT2	ACLY	ADAM19	ADCY3	ADRM1	AHSA1	AK2	ALDOA	ALG3	ALG8	AMD1	ARID4B	ARMET	ARS2	ATP1B3	ATP2A2	ATP5G3	ATR	BAZ1A	BCAP31	BMS1	BOP1	BTK	BYSL	BZW1	C11orf9	C19orf50	C1QBP	CAD	CALR	CAPRIN1	CCDC6	CCNB1	CCND1	CCT2	CCT5	CCT6A	CDC123	CDC20	CDC25A	CEBPZ	CELSR2	CHD4	CLIC1	CNGB1	COG2	COPS3	CSE1L
Glutamine_starve_up	AARS	ABCB9	ABI1	ACADVL	ACP1	ACTA1	ADA	ADD3	AIM1	AKR7A2	ALDH2	ALDH6A1	APBB3	ARID3A	ARL2BP	ARRB2	ASMTL	ASNS	ASS1	ASXL1	ATF4	ATF5	ATP5S	ATP6V0A1	ATPAF2	ATRX	BACH1	BAI2	BARD1	BCAT2	BCKDHA	BCKDHB	BCL7A	BCL9	BIRC5	BLK	BLOC1S1	BMI1	BMP7	BNIP3L	BRD8	BTG1	BTG2	BUD31	C1orf77	C21orf33	C2CD3	C6orf130	CABIN1
Glycolysis	ENO1	GAPDH	LDHA	PGAM1	TPI1
HIF1alpha_1.5x_Up	ABCA1	ACVR1B	ADM	ADORA2A	AFAP1	AK3L1	AK3L2	ANGPTL4	APOD	ARL4C	ATP2C1	ATXN1	B3GALT4	BACE2	BCL6	BGN	BHLHB2	BNIP3	BNIP3L	C8orf4	CD200	CDH2	CDKN1C	CHST1	CHSY1	CLIP2	COL18A1	COL1A2	COL4A1	COL4A2	COL5A1	COL9A1	CUBN	CX3CL1	CXCR4	CXCR7	CYP4F11	DCHS1	DDIT4	DKK3	DUSP6	EDN1	EGLN1	EGLN3	ENO2	ENPP1	EPOR	ERO1L	F8
HIF1alpha_1.5x_down	ABCF2	ACAT2	AKAP1	AMDHD2	ARS2	ASF1B	BARD1	BOP1	BRCA1	BYSL	C11orf48	C12orf48	C12orf52	C17orf80	C1orf112	C20orf27	CAD	CCDC99	CCNA2	CCNE1	CCNE2	CCNF	CD3EAP	CDC2	CDC6	CDC7	CENPN	CHAF1A	CIAO1	CPN2	CSE1L	CTPS	DBF4	DDX11	DDX19A	DDX21	DGCR11	DHCR24	DHCR7	DHFR	DHX35	DKC1	DLAT	DLEU2	DNA2	DNAJC9	EBNA1BP2	EEF1E1	EIF2B3
HIF1alpha_2x_Up	ABCA1	ADM	ADORA2A	AK3L1	AK3L2	ANGPTL4	B3GALT4	BACE2	BGN	BHLHB2	BNIP3L	C8orf4	CDKN1C	COL1A2	COL5A1	CX3CL1	CXCR4	DDIT4	DUSP6	EGLN1	EGLN3	ENO2	ENPP1	FAM128B	GABRP	GALNAC4S-6ST	GJA5	GPC1	IGFBP3	INHBA	INHBE	INSR	JMJD1A	KANK3	LOX	LRRC32	MAFF	MGC13053	MN1	NARF	NDRG1	NEDD9	NFASC	NOTCH4	P4HA1	PDZD2	PLCG2	PLOD2	PPARG
HIF1alpha_2x_down	AMDHD2	BRCA1	C12orf52	CCNE2	CCNF	CDC6	CHAF1A	DDX11	DGCR11	DLEU2	ELK1	ELOVL6	EMG1	ERCC6L	EXO1	FBXO5	GINS1	GINS2	HIST1H3D	LRP8	MCM10	MCM2	MCM4	MCM5	MLLT10	MRTO4	NUP98	PBK	POLR3K	PPARD	PRMT7	RGS4	RRM2	SKP2	SLC19A1	SLCO4A1	TIPIN	TSFM	TSR1	TTLL4
HRAS_overexpression_2x_down	ABCA1	ADAMTS5	AHNAK2	ARHGEF9	BCL6	C7orf49	CASP1	CCNL1	COL12A1	COL27A1	CYP1B1	CYP2R1	DDX17	DKK3	DLL1	DNAJC6	EFNA5	EPHA4	FAM46B	FBXO9	FGFR2	FLJ27365	FN1	GAS1	GLCCI1	GRHL2	HIST1H1E	HIST1H2AC	HMGN3	HNRNPH1	HOXC6	IL23A	IRX2	KANK4	KIAA0528	KIAA0802	LATS1	LGALS8	LOC100130506	LOC203274	LOC730256	LRIG3	LYN	MALAT1	MBNL2	MDH1	MED25	MID1	MLL3
HRAS_overexpression_2x_up	ACOT7	ADAM8	ADRB2	AGPAT9	AKAP12	ANGPTL4	ARG2	ARHGAP25	ARHGAP27	ATP2B1	B3GNT5	B4GALT1	BMP2	C14orf139	C16orf74	C19orf10	C6orf141	C9orf46	CALM2	CALU	CAPZA1	CCL20	CCNA1	CD274	CD55	CDCP1	CHST11	CLCF1	CSNK1E	CXCL1	CXCL2	CXCL3	CXCL5	CYP27B1	DENND2C	DLST	DUSP1	DUSP4	DUSP5	DUSP6	EFNB1	EGR1	EHD1	ELK3	ELOVL7	EPAS1	EPHA2	EREG	FAM110C
HRAS_overexpression_4x_up	ADAM8	AKAP12	ANGPTL4	ARHGAP25	ARHGAP27	B3GNT5	BMP2	C14orf139	C9orf46	CCL20	CD55	CDCP1	CHST11	CLCF1	CXCL1	CXCL2	CXCL3	CXCL5	DUSP1	DUSP4	DUSP5	DUSP6	EGR1	ELK3	ELOVL7	EPAS1	EPHA2	EREG	FAM110C	FAM83A	FERMT1	FLJ43663	FOS	FOSL1	G0S2	GJB3	GJB5	HBEGF	HPSE	HRAS	IER2	IER3	IL11	IL13RA2	IL1A	IL1B	ITGA2	JMJD3	JUNB
Hemaglobin_Node98	HBA1	HBA2	HBB
Hematopoietic_Node1658	ADRBK1	ALOX5AP	ARHGAP25	ARHGAP4	ARHGDIB	ARPC1B	ARPC4	ATP2A3	BIN2	BTG1	BTN3A2	BTN3A3	CCL5	CD37	CD48	CD52	CD53	CECR1	CENTB1	CNPY3	CORO1A	COTL1	CTSS	CXCR4	CYBA	DENND2D	DHX8	DOCK2	DPEP2	ELF1	ELF4	EVI2B	FGR	FMNL1	GIT2	GMFG	HCLS1	HMHA1	ICAM3	IKZF1	IL10RA	IL27RA	ISG20	LAIR1	LAPTM5	LAT2	LCP1	LCP2	LIMD2
Hematopoietic_Node1659	ACP1	BAX	CD2BP2	DAP3	DDX23	EHD1	ELAC2	GIYD2	ILF3	NUP93	PPP4C	PRR14	RBM10	RRP7A	SNX17	UTP3	WBP11	WDR68
IFN_PMBC_2x_Up	ACTA2	ADAM19	ADAR	AFF1	AGRN	AIM2	ANK3	APOBEC3B	APOBEC3G	APOL1	BAK1	BST2	CASP10	CASP7	CCDC75	CCL7	CCL8	CD164	CD38	CD69	CEACAM1	CNP	CXCL10	CXCL11	CXCL9	CYP2J2	DEFB1	DNAJA1	DRAP1	DUSP5	DYNLT1	ENDOD1	FAS	FASLG	FCHSD2	FGL2	GBP1	GBP2	GCH1	GMPR	GPR15	IFI16	IFI35	IFI44	IFI44L	IFI6	IFIT1	IFIT2	IFIT3
IFN_PMBC_4x_Up	ACTA2	APOBEC3B	APOBEC3G	APOL1	BST2	CASP10	CCDC75	CCL7	CCL8	CD38	CEACAM1	CXCL10	CXCL11	CXCL9	CYP2J2	DEFB1	DUSP5	FAS	FASLG	GBP1	GCH1	IFI35	IFI44	IFI44L	IFI6	IFIT1	IFIT2	IFIT3	IFIT5	IGFBP4	IL12RB2	IL15RA	IL18RAP	IL1RN	IL6	INDO	IRF2	IRF7	IRS1	ISG15	ISG20	JAK2	KLF5	LAG3	LAMP3	LBA1	LGALS3BP	LGALS9	LY6E
IL10_OCILy3_Up	ACPP	ADRBK1	AHR	AIM2	ARHGEF6	ARID5B	ATF3	BANK1	BATF	BATF3	BCAR3	BCL3	BCL6	BCL9L	BIC	BIRC2	BIRC3	BMF	C14orf143	CCND3	CD14	CD274	CD36	CDKN1A	CEBPD	CIITA	CISH	CLIP1	CR2	CRADD	CRY1	CXCL13	CXCL9	CXCR5	DDB2	DHRS9	DMD	DUSP1	ELF3	FGF7	FIG4	FKBP15	FLI1	FLT1	FOSL2	FTH1	FUT8	GCA	GLRX
IL6_Ly10_Up_all	BATF	BCL3	BHLHB2	BIRC3	CCL3	CCL3L1	CCL4	CD36	CISH	CXCL9	CXCR5	DUSP2	EGR2	ELF3	FLJ45513	GLRX	GNAQ	GPR183	ID2	IL10	IL2RB	IRF4	JUN	JUNB	KLF10	MMP7	MYC	PTPN1	SGK1	SLC2A5	SLC35A2	SOCS1	SOCS2	SOCS3	TCF12	TRADD	TYRO3	ZBTB20	ZFP36
IL6_Ly10_Up_group1	BATF	BHLHB2	BIRC3	CCL3	CCL3L1	CCL4	CISH	CXCR5	DUSP2	EGR2	ELF3	FLJ45513	ID2	IL10	IRF4	JUN	JUNB	KLF10	MYC	SGK1	SLC35A2	SOCS1	SOCS2	TRADD	ZFP36
IL6_Ly10_Up_group2	CD36	CXCL9	GNAQ	IL2RB	MMP7	PTPN1	TCF12	TYRO3	ZBTB20
IL6_Ly10_Up_group3	BCL3	GLRX	GPR183	SLC2A5	SOCS3
IRF3_target_gene	AANAT	AASS	ADAR	AKAP12	ALDH1B1	ALX3	ARPC5L	ASS1	ATP10A	AXL	AZI2	BICD1	C3	C8orf33	C9orf46	CASP1	CASP3	CASP7	CCDC25	CCDC50	CCL19	CCL5	CCL8	CCRL2	CD86	CDC25A	CEP350	CFB	CHD1	CLIC4	CMPK2	CNTNAP5	CPNE3	CRIM1	CST7	CXCL10	CXCL11	CXCL9	DAXX	DBNL	DCK	DDX4	DHX36	DHX58	DUSP8	EDF1	EFS	EIF2AK2	ELN
IRF4_myeloma_induced_Agilent	ABHD10	ACSS2	AGPAT2	AHCY	ALDH1L2	ALDOC	AMPD1	ANKRD37	ANKZF1	APOBEC3B	APOBEC3D	APOBEC3H	ASB13	ATF3	ATP6V1E2	AVPI1	B3GNT1	BCKDHA	BCL2L2	BHLHB8	BMP6	BSPRY	C11orf24	C14orf93	C16orf14	C17orf39	C1orf2	C22orf9	C5orf32	C9orf100	CALCOCO2	CANX	CAV1	CCDC134	CCDC52	CCDC74B	CCL3	CD97	CDKN1B	CDT1	CFLAR	CHRAC1	CMTM8	CNOT6	CTH	CYP51A1	DDHD2	DENND2C	DIXDC1
IRF4_myeloma_induced_Lymphochip	ACP1	ADAM9	ATF4	ATP5D	ATRX	AURKA	AXIN1	BCL2	BMI1	BMP6	BNIP2	C12orf57	CASP3	CCNC	CCPG1	CD38	CDK6	CEBPZ	CENPF	CTR9	CYCS	CYP51A1	DDIT3	DDR2	DEPDC1	DKFZp547E087	DNAJB9	DNAJC10	DUSP5	E2F5	EIF2S2	EIF3E	ELL2	ELN	FADS1	FAR1	FRMD6	FYN	GARS	GLS	GNG10	GOLGA7	GRSF1	HMGB1	HMGCR	HMMR	HSP90AA1	HSP90B1	IDH1
IRF4_myeloma_induced_all	ABHD10	ACP1	ACSS2	ADAM9	AGPAT2	AHCY	ALDH1L2	ALDOC	AMPD1	ANKRD37	ANKZF1	APOBEC3B	APOBEC3D	APOBEC3H	ASB13	ATF3	ATF4	ATP5D	ATP6V1E2	ATRX	AURKA	AVPI1	AXIN1	B3GNT1	BCKDHA	BCL2	BCL2L2	BHLHB8	BMI1	BMP6	BNIP2	BSPRY	C11orf24	C12orf57	C14orf93	C16orf14	C17orf39	C1orf2	C22orf9	C5orf32	C9orf100	CALCOCO2	CANX	CASP3	CAV1	CCDC134	CCDC52	CCDC74B	CCL3
IRF4_myeloma_induced_direct	AMPD1	B3GNT1	C11orf24	CANX	CASP3	CCNC	CDK6	CDKN1B	CFLAR	DDR2	DENND2C	DUSP5	E2F5	ELL2	FBXO16	GFPT1	IRF4	ISG20	ITGB7	MAN2A1	MYC	NFIL3	P4HA1	PAM	PHKA1	PIM2	PRDM1	SCD	SLAMF7	SLC37A4	SQLE	STAG2	SUB1	TNFAIP3	TNFRSF17	TUFT1	UAP1
Immediate_early	DUSP1	EGR1	FOS	FOSB	JUN	JUNB	KLF6	SNF1LK	ZFP36
Immunoglobulin_Node2868	CKAP2	IGHG1	IGJ	IGKC	IGKV1D-13	IGL@	IGLL3	IVD	LOC100130100	LOC100133862	LOC652494	LOC91316	NTN2L
JAK_IL10_Ly10_Up	AIM2	BATF	BCL3	BIC	BIRC3	C14orf143	CD14	CD36	CLIP1	CXCL9	DHRS9	ELF3	FGF7	FUT8	GNG10	GPR183	HES1	ID2	IFITM2	IL2RB	JUN	JUNB	KLHL6	LILRB1	LTBR	2016-03-01	MCL1	MNDA	PARP9	PHLDA1	PRDM1	PTPN2	SAMSN1	SOCS2	ST6GAL1	STAT3	TP53BP2	TRIM22	ZFP36
KLF2_induced	ARHGEF10	ARHGEF18	ATP6V0D1	BCL7A	BIN1	C15orf39	CACNA1H	CALM1	CAPG	CASP10	CASP8	CCND2	CD47	CD52	CD53	CDC25B	CDKN2D	CHST6	CRBN	CREBBP	CRIP1	CX3CR1	CXCR3	DOK2	ELF4	ELN	EMP3	FAM53B	FAM62A	FAM65B	FAM89B	FBLN2	FHL2	FLNA	FMNL1	GARNL4	GLG1	GNS	GPR56	GZMA	H2AFV	HLA-A	HLA-B	HLA-E	HLA-F	HLA-G	HMHA1	ID3	IL10RA
KLF2_repressed	ABCB7	ABCG1	ACAT1	ACCN2	ACTN1	AEBP1	ALDH1A2	APRT	BAG2	BATF3	BCL7B	BLVRA	C13orf15	C13orf18	C16orf58	C18orf1	C7orf44	C7orf64	CD1A	CD1B	CD1C	CD1E	CD40LG	CEP70	CHI3L2	CHPT1	CHST11	CLPB	CMAH	CTNNAL1	DARS	DBNDD2	DCTD	DECR2	DHCR7	DNTT	EFEMP1	EGR1	EPHX2	EXOSC4	FAH	FAM46C	FBXO9	FDFT1	FHL1	FLOT1	FXYD2	GART	GLRX2
KRAS_Down	ALDH3A1	APP	ARL4C	ATP6V1B2	BEX1	BYSL	C16orf53	CALU	CC2D1A	CEACAM6	CHIT1	CRISP1	CTSL1	CXCL5	CXorf1	DKK1	DUSP4	EBNA1BP2	EIF5	ENTPD6	EPB42	EPHB3	ETV5	F2RL1	FOSL1	GPD1	H2AFY	H3F3B	HMGA2	IGF2AS	INHBB	IRS2	KRAS	LBR	LRP8	MALL	MLX	MRPS12	NUP62CL	ODC1	PARD6A	PARD6B	PDE4C	PDZD3	PHLDA1	POLR3K	PPP1R3A	PRMT5	PTMA
KRAS_Up	ACVR1B	ADAM19	ADCY7	ATP2B4	BHLHB2	BMP1	C1S	C8orf4	CADM1	CALD1	CCDC53	CCL2	CDH4	CHST3	CLDN4	COL1A1	COL4A1	COL4A2	COL5A1	COL7A1	CXCR7	DFNA5	DICER1	DKK3	DNAJB2	ECE1	EPHB2	EVL	FERMT2	FLRT2	GABARAPL1	GADD45B	GLIPR1	GOLGA8F	GPR56	HGD	HSPB1	HSPG2	IGFBP3	IGFBP7	INPP4B	ITGAV	JAK1	JUN	JUNB	LAMP2	LBH	MAP3K8	MATN2
Leucine_starve_down	ACAT2	ACOT7	ADRM1	AHSA1	ALDOA	ALG8	AMD1	ARID4B	ARMET	AURKA	BRD2	BST2	BYSL	C11orf9	CAD	CALR	CCNA2	CCNB1	CCT2	CCT4	CCT5	CCT6A	CDC20	CDK2AP2	CEBPZ	CNGB1	COPB2	COPS2	CSE1L	CTSC	CYC1	CYCS	DDX1	DDX21	DHCR24	DHRS1	DHX9	DNAJA1	DNAJB6	DNAJC11	DYNLL1	DYRK1A	EBP	EI24	EIF2B4	EIF4G1	EIF4G2	EIF5	EMD
Leucine_starve_up	AARS	AIM1	ALDH2	ALPK3	APBB3	APOBEC3G	ARID3A	ASNS	ASS1	ATF4	ATF5	ATXN2L	BACH1	BCL7A	BMI1	BMP1	BMP7	BNIP3L	BTG2	BUD31	C20orf117	CAMK1	CARS	CCDC28A	CD22	CD27	CD6	CDKN1A	CEBPB	CIRBP	CKB	CLCN6	CLIC4	CPNE5	CSNK1G2	CTAGE5	CUX1	CYB561D2	CYTH1	DAAM1	DDX46	DECR1	EIF1	ERCC2	FCER2	GBF1	GCDH	GCHFR	GPLD1
Lipid_enzyme_Node3152	ACACA	DHCR24	DHCR7	FADS1	HMGCR	HMGCS1	SC4MOL	SCD
Liver_fetal_lung_Node1634	AGXT	AHSG	ALB	ALDOB	AMBP	APOA1	APOA2	APOB	APOC2	APOC3	APOH	CPS1	F2	FABP1	FGA	FGB	FGG	HMGCS2	HPD	HPX	ITIH1	ITIH2	ITIH4	LBP	LIPC	MAT1A	ORM1	ORM2	PLG	SERPINC1	TM4SF4	VTN
Lung_Node3969	CASKIN2	CLDN18	EDN1	ELN	GPR116	MUC1	RAMP2	RP11-589B3.4	SCGB1A1	SFTPB	SFTPC	SFTPD	SLC34A2	TBX2	TMEM100
Lymph_node_DLBCL	A2M	ACP5	ACTN1	ADAMTSL4	ADH6	AIF1	ALDH1A1	ASAH1	B2M	BTN3A2	C3AR1	CASP1	CASP4	CCL18	CCL2	CCL5	CCM2	CCR1	CCR5	CD14	CD33	CD4	CD63	CD68	CD81	CD97	CEBPB	CHKA	COL15A1	COL3A1	COL4A2	COL6A1	CREG1	CSF1	CSF1R	CSF2RB	CSF3R	CST3	CTGF	CTSA	CTSB	CTSL1	CTSS	CXCL10	CXCL9	CXCR6	CYBB	CYP1B1	CYP27A1
Lymph_node_DLBCL_survival	ACTN1	COL3A1	CTGF	FAM38A	FN1	PLAU
MCL_gt_SLL_DLBCL	ALOX5	BANK1	CCDC50	CD1D	CD24	CEACAM1	CHL1	EPHB6	FAM83G	FCRL1	FCRL2	GNG11	GPR18	GRAP	IGFBP3	KLRC4	LY86	MARCKS	MFHAS1	MMP11	MS4A1	RNGTT	SP100	TLR10	WNT3	ZMYM2
MCL_proliferation_survival	ASPM	CDC2	CDC20	CDKN3	CENPF	HMGB2	HPRT1	MCM2	NEIL3	PCNA	PIF1	POLE2	RAN	TK1	TOP2A	TUBA1B	UHRF1
MHC_classII_DLBCL	CD74	HLA-DMB	HLA-DPA1	HLA-DPB1	HLA-DQA1	HLA-DQB1	HLA-DRA	HLA-DRB1
MHC_classII_DLBCL_survival	HLA-DPA1	HLA-DQA1	HLA-DRA	HLA-DRB1
MHC_classII_Node528	CD74	HLA-DMA	HLA-DPA1	HLA-DPB1	HLA-DQB1	HLA-DRA	HLA-DRB1	HLA-DRB4	LOC731682
MHC_classI_Node591	HLA-A	HLA-B	HLA-C	HLA-E	HLA-F	HLA-G	HLA-H	LOC730410
Metallothionein_Node595	MT1E	MT1F	MT1G	MT1H	MT1P2	MT1X	MT2A
Monocyte_4x_U133plus	ABCC3	ADAM9	AGPAT9	ALCAM	ALDH3B1	ANKRD57	ANPEP	APOBEC3A	AQP9	ARHGEF10L	ARHGEF11	ARRDC4	ASPH	ATF3	ATF5	ATG7	ATP13A3	B3GNT5	BCAT1	BST1	C13orf31	C15orf48	C19orf59	C3	C3AR1	C4orf18	C5AR1	CCL7	CCRL2	CD14	CD163	CD36	CD68	CD93	CDC42EP2	CENTA2	CENTG3	CES1	CFB	CFD	CFP	CKAP4	CLEC12A	CLEC4E	CLEC5A	CLEC7A	CLIC2	CPVL	CREG1
Monocyte_8x_U133plus	ANPEP	APOBEC3A	AQP9	ASPH	ATP13A3	C15orf48	C4orf18	C5AR1	CCL7	CCRL2	CD14	CD163	CD36	CD68	CDC42EP2	CES1	CFD	CFP	CLEC4E	CLEC5A	CLEC7A	CPVL	CSF1R	CSF2RA	CSTA	CXCL16	CXCL2	CYP1B1	CYP27A1	DMXL2	DOCK4	ELOVL7	EMR2	EREG	ETS2	FCAR	FCN1	FFAR2	FPR1	FPR2	FXYD6	G0S2	GPR109B	HCK	HK3	HNMT	HOMER3	IFIT2	IGSF6
Muscle_Node1645	ACTA1	ACTN2	ATP2A1	CKM	COX6A2	CSRP3	MB	MYH2	MYH7	MYL1	MYL2	MYLPF	MYOZ1	MYOZ2	NEB	SLN	TCAP	TNNC1	TNNI1	TNNI2	TNNT1	TPM1	TPM2	TTN
Muscle_Node2235	ACTG2	CNN1	DES	LMOD1	MYH11	PLN
Myc_ChIP_PET_2plus	A1CF	A2BP1	AAK1	AASDH	ABAT	ABCA3	ABCB9	ABCC3	ABCC4	ABCD3	ABCG5	ABHD11	ABI3BP	ABL1	ABLIM1	ABLIM2	ABR	ABRA	ABT1	ABTB2	ACACA	ACADM	ACAT1	ACBD6	ACCN1	ACE	ACN9	ACO1	ACOT7	ACOXL	ACP1	ACR	ACSS1	ACTBL3	ACTG2	ACTL8	ACTN1	ACTN4	ACTR5	ACTRT2	ACVR1C	ACVR2B	ACYP2	ADAM12	ADAM15	ADAM28	ADAM29	ADAMTS12	ADAMTS17
Myc_ChIP_PET_3plus	A2BP1	AAK1	ABCC4	ABR	ABT1	ACYP2	ADAM29	AKAP2	ALDH3B1	ALOX15B	AMPD1	ANAPC5	ANKRD16	ANKRD46	ANKS6	ANLN	ANP32B	AP3B1	ARHGEF18	ARL4C	ASTN2	ASXL3	ATP1A1	ATP2A2	ATP5D	ATP6V1E1	ATXN7L2	AUH	B4GALT1	BAHD1	BCL11A	BCL2	BCL7A	BCL7C	BCR	BDKRB2	BICD2	BMI1	BRD2	BRI3BP	BUB1	C12orf67	C13orf36	C14orf132	C14orf159	C15orf2	C17orf81	C18orf45	C20orf106
Myc_ChIP_PET_Expr_Down	ACE	ACSS1	ADRBK2	AKAP11	AKAP13	ALOX5	ANKDD1A	ANKRD13D	APBB1IP	APOL3	ARHGEF11	ARHGEF7	ARL4C	ARPC1B	ARRDC3	ASPHD2	ATG16L2	ATP2B4	ATP8A1	ATP8B1	AXUD1	B3GNT1	B4GALT1	BASP1	BCL2	BCL2A1	BCL3	BHLHB3	BLK	BNIP3L	BTG1	C14orf159	C19orf66	C7orf60	CABIN1	CALCOCO1	CALM2	CAMK1D	CAPG	CASP1	CBFA2T2	CBFA2T3	CCDC128	CCDC91	CCDC92	CCM2	CD44	CD47	CD97
Myc_ChIP_PET_Expr_Up	ABCD3	ABLIM1	ACACA	ACAT1	ACBD6	ACN9	ACOT7	ACP1	ACTN1	ADCK2	ADCY3	ADSL	AGBL5	AGPS	AK2	AK3	AKAP1	AMMECR1	AMN	ANAPC5	ANP32B	APEH	APP	APRT	ARHGAP6	ARIH2	ARL5A	ARL6IP6	ARPC5L	ASNS	ASS1	ATP1A1	ATP2A2	ATP5D	ATPBD4	BAG1	BCLAF1	BICD2	BMP7	BNIP3	BUB1	BUB1B	BUB3	C10orf119	C12orf30	C12orf52	C12orf66	C13orf3	C14orf104
Myc_RNAi_OCILy3	ADSL	ADSS	AKAP10	BAG1	CD164	CDC123	CDK4	CSTF3	CYCS	CYP2B6	DEPDC1	DHX15	DLEU1	DNAJC2	EIF3B	EIF4G1	ENO1	ETNK1	FBL	FBXO45	GLS	GMPS	GNL3	GSPT1	HMGB1	HSP90B1	HSPA9	IMPDH2	MFSD8	MNAT1	NOL1	NOL5A	NOLC1	NPM1	NPM3	PHB2	POLD2	PSME3	PUF60	ROCK1	SCARB1	SKIV2L2	SLC38A2	SNW1	SRP72	SRPK1	ST13	TFAM	THOP1
Myc_overexpression_1.5x_up	AGPAT5	ALG3	ATIC	BID	BOP1	C10orf2	C12orf66	C16orf14	C19orf48	C1orf107	C1orf51	C20orf27	CCDC78	CCDC86	CDK4	CIRH1A	DDX10	DDX28	DKC1	DUSP2	ECE2	EXOSC5	FAM100A	FAM86B1	FARSA	FARSB	FLAD1	FLJ10661	GEMIN5	GNL3	GPATCH4	GPD1L	HK2	HS6ST2	HSPA1A	HSPA6	HSPC111	HSPD1	IPO4	JTV1	LSG1	METTL1	MON1A	MRTO4	MYBBP1A	MYC	NCL	NLE1	NOL5A
Myc_overexpression_2x_down	AKAP12	ARNTL	CDK2	DDAH2	GPRC5A	HIST1H2AC	NTF4	OSBP2	PC	PLAU	PLEKHG2	RPL39	SERPINB1	TGM1	TMEM49	TUBA1A	YPEL3	ZBED2
Myc_overexpression_2x_up	AGPAT5	C10orf2	C12orf66	C19orf48	CCDC78	DDX28	DKC1	DUSP2	ECE2	EXOSC5	FAM86B1	FARSB	FLJ10661	GEMIN5	GPD1L	HK2	HS6ST2	HSPA1A	HSPA6	MYBBP1A	MYC	NCL	NOL5A	PLD6	RPP40	RRP9	SLC19A1	SLC6A15	SLC6A8	TAF4B	TMEM97	TRMT1	UBIAD1	UTP14A
Myeloid_Node1536	AIF1	CFP	CYBB	FCN1	HCK	HK3	ITGB2	LILRB1	LILRB2	LILRB3	LST1	MNDA	NCF2	RNASE6	SPI1	STX11	TLR2	TLR8	TYROBP
Myeloid_Node2894	AQP9	C5AR1	CD14	CD163	CSF1R	CSF3R	FLJ22662	FPR1	MS4A6A	S100A12	TREM1
Myeloid_progenitor_Node3051	AZU1	CLC	ELA2	MPO	RNASE2	RNASE3
Myeloma_CD-1_subgroup_down	ABHD6	ADAM19	ATP6AP1	BCL2L1	BHLHB3	C1orf115	CCDC125	CD46	CD59	CLIC2	CMTM4	CNTN4	CPEB4	CPNE5	CXXC5	DOK3	ECHDC2	F11R	FAM63B	FLI1	FUT8	GATM	GRAMD3	HES1	ITPR3	KIAA0040	LAX1	LOC100131819	NOTCH2NL	PRKCD	PRKD3	RAB3B	RAB3IP	SCAMP5	SLFN11	SMURF1	SNF1LK	SPINT1	ST6GAL1	STARD5	TNS3	TRAM2	UCP2	UGCG	UNC93B1
Myeloma_CD-1_subgroup_up	ADRB1	ALPK2	ASB2	ATF5	BATF3	BGLAP	CEBPB	CLEC2D	CSTA	CTH	EIF4EBP1	ERN1	FYN	G0S2	GPR63	GPT2	HADH	INHBE	ITGAL	KLHL4	LOC100131096	MFAP4	MTG1	NID2	NSUN7	PCDH20	PCK2	PHGDH	PTGER2	RAB31	RAB33A	RBP1	RGAG4	SESN2	SLC7A11	STC2	SYTL1	TBC1D16	TM6SF1	TMC6	TMC8	TOX2	TRIB3	TXNDC13	VPS37A
Myeloma_CD-2_subgroup_down	ANXA2	AVEN	BOP1	BZW2	C1orf53	C3orf59	CHAC2	CR2	FABP5	FAM171A1	FASN	GJB2	GPR37	GPRC5D	HIST1H1C	HK2	HMGA1	HN1	HRASLS3	JAK3	KTELC1	LATS2	LDHA	MCC	MFNG	MREG	MRPS30	MSRB3	NEDD4	NFIA	OSBPL3	PAQR6	PFKFB2	POLR2H	POLR3G	PPA1	PRICKLE2	RRAGD	SORD	TDO2	THEM4	TXN	TXNDC11	UCK2	USP45	ZNF593
Myeloma_CD-2_subgroup_up	ADSSL1	APLP2	B3GALNT1	C1orf165	C2orf24	CD27	CD79A	CLLU1	CNR1	DHTKD1	DTX1	DYRK2	FCRLB	ITPKB	LAMA2	LOC100134371	LOC338758	MARCKS	METRNL	MS4A1	NAGK	NF1	PDZRN4	PHLPPL	PIK3AP1	PLXNB2	PNOC	PPAP2B	PRDM5	PTPRJ	RCBTB2	RERE	RGS13	RNGTT	SDC2	SLC8A1	SORT1	SPAG4	SRC	TGIF1	TNFSF8	TRAF5	VPREB3	ZNF395	ZNF608
Myeloma_HY_subgroup_down	AGA	AP1S2	APBB1IP	C18orf10	C6orf129	CALHM2	CD52	CD86	CKS1B	CST3	DEK	DEPDC6	DNAJC12	DOCK11	DPM3	EIF4EBP2	FAM59A	GBA	IL27RA	IRF2BP2	KCNN3	LHPP	LOC286167	MSTO1	MYO1B	NANOS1	NES	NTAN1	OPN3	PDIA6	PKIA	PLP2	PRSS16	RAPH1	RBMS1	S100A4	SGPL1	TAGLN2	TBCE	TCFL5	TEGT	TIMP1	TMEM107	TP53BP2	TSEN15	WARS
Myeloma_HY_subgroup_up	AMIGO2	ATP5L	C11orf2	C20orf199	C5orf26	CCDC85A	CCRL2	CDV3	CNTN5	CSNK1G3	DDX58	ELOVL7	EPHB1	F2R	FCHSD2	FLI1	FRZB	GBA3	GLTSCR2	GNG11	GTF2F2	IPO7	ISL2	KIAA0141	LAG3	LAMP3	LOC129293	LOC727797	LOC728769	LOC729926	OAS2	PAK1	PIP5K1B	POLR1D	RBM4B	RC3H2	RPL13A	RPL37	RSAD2	SCAPER	SCYL2	SEMA4D	SIDT1	SNHG1	SNHG7	THG1L	TNFSF10	XRCC4
Myeloma_LB_subgroup_down	AKNA	BASP1	CAP1	CASP4	CCR2	CKLF	DDX60	DIRAS2	DUSP6	ENAM	FAM70A	FAM91A2	GTPBP1	HIF1A	HIST1H3D	IFI27	IFI35	IFI6	IFIT5	IRF1	LOC643733	LOC727820	LOC730256	LY6E	LYSMD2	MAN1C1	MX2	PARP8	PDE4DIP	PSMB10	PTPRCAP	RSAD2	RTP4	SEPHS1	SMAD1	STAT1	STAT2	TACC1	TRAF5	USP18	WIPF1	XAF1	ZC3H12C	ZMIZ1	ZNF818P
Myeloma_LB_subgroup_up	ARD1B	ARID5B	ARNT2	BIK	BOC	C19orf36	C6orf105	CACNB3	CGREF1	COL9A2	COPZ2	CSF2RB	CTTN	CYBRD1	EDN1	FLJ13137	FLNB	HES5	KCNJ11	KIAA0895	LOC283454	LOC338620	LYPD6B	MAP4K3	MAST4	MBD2	NAMPT	NTHL1	P2RX5	PARP15	PCGF5	PHACTR3	PLEKHA7	PLS1	PLXNA1	PPP1R14A	RASGRP1	RELL1	SAMD3	SLC39A6	SMAP2	SRGAP2P1	USP53
Myeloma_MF_subgroup_down	AIG1	ALDH2	AMIGO2	ARMC2	BRSK1	C12orf59	C13orf15	CAMK1D	CBLN1	CCDC110	CHST11	CREB3L2	DKK1	DOCK9	ENAH	ESRRG	FAM3C	GLCCI1	GPLD1	ITSN1	KLHDC5	LBA1	LOC100130360	LOC145842	LOC283070	LOC730272	MGC26718	MOBKL1A	MOXD1	MTDH	NRG3	PDZRN4	PRKCA	PTCH1	RAD17	RAPGEF2	SCAPER	SEC62	SLC12A8	SLC22A15	STRBP	STXBP6	SYNGR1	TMEM170B	TNFAIP8	ZNF275
Myeloma_MF_subgroup_up	ABHD12	ABLIM1	AGMAT	APOBEC3A	ARHGAP6	ARID5A	ARPC1B	ATP13A2	C20orf39	CCDC86	CD109	CDH1	CEBPD	COTL1	CX3CR1	CXCL12	DEFB4	DFNB31	DOCK4	DPYSL2	FAM174B	FAM70A	GPM6B	GREB1	ITGB7	LCP2	LOC151162	LOC643201	MCTP1	MFAP2	NMU	NTRK2	NUAK1	PEBP1	PRSS7	PYGB	RASSF4	RNASE6	SFRP2	SHMT1	SLC25A20	SMARCA1	SPP1	TLR4	TMEM37	TRIM47	TUBB2B	TYMP
Myeloma_MS_subgroup_down	ANKRD49	APOL1	ARHGEF12	ARSG	C11orf73	C7orf41	CHD2	CHD7	CLTA	DHPS	DPP7	FAM133A	FLJ32810	GPX1	ICAM4	ISL2	JOSD3	KIAA1704	KIAA1826	LETMD1	LOC645212	MAGEC1	MOBKL2A	MRPS31	NAPRT1	NMRAL1	NPAT	OAS3	PIF1	POLR1D	PRDM5	RHOBTB3	RPS2	2016-09-09	SLC16A6	SLC35D2	SLC35F2	SPIN3	STK24	TKT	TLR10	TMEM123	TMEM126A	TMEM133	ZBTB26
Myeloma_MS_subgroup_up	BACE2	C10orf30	CENTG2	CLEC11A	CLGN	CLIC6	CST3	DSEL	DSG2	DTNA	FAM171A1	FGFR3	FZD2	FZD8	JAM3	KLHL13	LARP6	LRP12	MAGI1	MARK1	MITF	MYO10	MYRIP	NAP1L3	NGFRAP1	NRIP1	PALLD	PBX1	PCSK5	PPM1H	RAI2	RMST	RNF32	RUNDC3B	SERPINE2	SLC22A17	SPRY2	TCEAL2	TEAD1	TMEM176A	TMEM176B	TRIM58	VWA5A	WHSC1	WWC2	ZNF503	ZNF521
Myeloma_PR_subgroup_down	ALCAM	ANKRD44	ARHGAP18	ARID5B	BAZ2B	BCL10	BLNK	CBX7	CNTN1	CYLD	DDHD2	DPYD	DUSP26	EPS15	FGD4	FGF2	FLJ25076	GAB1	INADL	JMJD1C	KAT2B	MAP2	MEI1	MOBKL2C	NLK	NR3C2	PAXIP1	PCDHGC3	PHF1	PPAPDC1B	PRDM2	PWWP2B	RASGRP3	RGPD5	RSBN1	SATB1	SH3GLB1	SLC7A7	SMAP2	SOCS1	SYNE2	TBC1D10C	TFEB	TK2	TMEM167B	ZBTB20	ZHX2
Myeloma_PR_subgroup_up	ASPM	AURKA	BIRC5	BRP44	BUB1B	C18orf24	CCDC34	CCNB1	CCNB2	CDC2	CENPL	DEPDC1B	DLGAP5	DSCC1	E2F8	EZH2	FANCI	FOXM1	GAGE12F	GAGE12I	GAGE6	GAGE7	GCUD2	KIAA0101	KIF14	KPNA2	MAGEA1	MAGEA3	MCM10	NEK2	NUF2	NUSAP1	PRC1	RACGAP1	RFC4	RRM2	SLC19A1	SPC24	SPC25	TOP2A	TPX2	TRIP13	TSR1	TTK	TYMS	UBE2C	UBE2T	ZWILCH
Myeloma_TACI_high_bone_marrow_plasma_cell_gene	AKAP7	AKR1C1	AMN	APOC2	AZGP1	B4GALT1	BIRC7	C10orf11	C1QL1	C1orf61	C1orf63	C3AR1	C3orf37	CAPS	CCDC151	CDKN1C	COL11A2	CTRB2	CXCL1	DAO	DDIT3	DDR1	DSP	DUSP1	EPB49	EPHB4	EPHB6	FIP1L1	FLJ12355	FMOD	GABBR1	GCOM1	GGTA1	GIT1	GNA11	GNAQ	GSTA4	HNRPDL	HRK	HS3ST2	HYI	KCNH2	KHSRP	KIAA0284	LMNA	LOC284454	MAML3	MAMLD1	MAN1C1
Myeloma_TACI_low_plasmablast_gene	AASDHPPT	ASF1A	BARD1	C10orf137	C17orf42	C1QBP	C1orf131	C7orf30	CBWD6	CCDC5	CCT2	CCT5	CDC2	CDC23	CEP152	CHCHD1	CHEK1	CHMP4A	CIRH1A	CMC1	CYP2R1	DDX1	DKC1	EBNA1BP2	EFTUD2	EIF3G	EZH2	FAM98B	FIBP	G3BP1	GPR89A	IARS	IHPK2	IK	IREB2	JTV1	KEAP1	KIAA1731	KLF13	LAP3	LSM4	LSM5	MCM2	MRPL43	MRPS12	NASP	NCAPD3	NDUFA13	NMT1
NFKB_K1106	BCL2A1	BIC	CCL22	CCL5	CD44	CD83	CR2	DUSP2	ICAM1	LTA	NFKB1	NFKBIA	RFTN1	SPI1	SRP72	TNF	TRAF1
NFkB_OCILy10_only	CCDC76	CCL3	CCL4	CCND2	CFLAR	FKBP15	HEATR1	IL10	LOC154761	LYN	MMP7	MX1	PLEK	RGS1	SAMD9L	SELL	STAT1	ZNF335
NFkB_OCILy3_only	AHR	CXCL13	GPR183	IL12B	IL6	IRF1	JUNB	LITAF	SOCS2	ZFP36L1
NFkB_all_OCILy3_Ly10	AHR	BATF	BCL2A1	BCL2L1	BIC	BIRC3	CCDC76	CCL22	CCL3	CCL4	CCND2	CCR7	CD40	CD44	CD83	CEP110	CFLAR	CXCL10	CXCL13	CXCL9	DUSP2	EBI3	ELL2	FAM65B	FKBP15	GADD45B	GPR183	HEATR1	ICAM1	ID2	IL10	IL12B	IL6	INSIG1	IRF1	IRF4	JUNB	LITAF	LOC154761	LOC283663	LTA	LYN	MARCKS	MMP7	MX1	NAMPT	NCF2	NCL	NFKB1
NFkB_bothOCILy3andLy10	BATF	BCL2A1	BCL2L1	BIC	BIRC3	CCL22	CCR7	CD40	CD44	CD83	CEP110	CXCL10	CXCL9	DUSP2	EBI3	ELL2	FAM65B	GADD45B	ICAM1	ID2	INSIG1	IRF4	LOC283663	LTA	MARCKS	NAMPT	NCF2	NCL	NFKB1	NFKB2	NFKBIA	NFKBIE	PIM1	RASGRP1	RELB	SMARCA2	TNF	TNFAIP3	TRAF1
NK_U133plus	AP2A1	B3GAT1	C13orf33	C1orf187	CD300A	CHSY3	CTSW	DGKZ	EGFR	FCGR3B	HIVEP3	IGFBP7	KIR2DL1	KIR2DL2	KIR2DL3	KIR2DL4	KIR2DL5A	KIR2DS1	KIR2DS2	KIR2DS3	KIR2DS4	KIR2DS5	KIR3DL1	KIR3DL2	KIR3DL3	KIR3DS1	KIR3DX1	LIM2	LINGO2	MCTP2	MGC52282	MMP25	NCAM1	PRF1	TTBK2
Normal_mesenchymal-1_Node1643	ACTA2	ADAMTS1	AQP1	BGN	C10orf10	C1R	C1S	CALD1	CAV1	CAV2	COL1A1	COL1A2	COL3A1	COL4A1	COL4A2	COL5A1	COL5A2	COL6A1	COL6A2	COL6A3	CTGF	CXCL12	CYR61	DCN	EFEMP2	EHD2	EMP2	FBLN1	FBN1	FKBP9	FN1	FSTL1	GAS1	GNG12	GPNMB	GPX3	HSPG2	IGFBP4	IGFBP5	IGFBP6	IL1R1	ISLR	JAG1	KANK2	LAMA2	LAMA4	LAMB1	LAMC1	LRRC32
Normal_mesenchymal-2_Node1615	FBN1	LOXL1	MFAP2	MFAP5	MMP14	PXDN	SERPINE1	SERPINH1	TFPI2	THBS1
Notch_T-ALL_down_Palomero	CALM2	CDKN1B	COX7C	EDEM1	FAM117A	FIG4	GM2A	HIST1H2AK	JARID2	KIAA0391	NDRG1	SPCS2	TMEM59	ZWINT
Notch_T-ALL_down_Sharma	CADM1	CCNG2	CCR9	CD200	CD47	CD52	CD8B	CPEB2	CTSL2	FBXL12	GLCCI1	IFNGR1	LGALS1	LZTFL1	RAPGEF4	RORC	STK3	TCTEX1D1
Notch_T-ALL_down_Weng	C21orf66	C3orf58	CD247	DOK2	DUSP2	DUSP6	GADD45A	GATA3	GEM	IKZF1	ITK	KCTD12	LAPTM5	LASP1	PRKD2	PSTPIP1	SOX13	TES
Notch_T-ALL_up_Palomero	AARSD1	AHSA1	C16orf13	C21orf59	CSDA	DDX28	DDX56	EMG1	FYCO1	GSPT1	HDAC4	HES1	HSPC111	IFRD2	ITPR2	KARS	KPNB1	MRPL24	MRPL4	MRTO4	MTMR4	MYC	NAT10	NOL5A	PDSS1	PHB	PMM2	POLR1A	POLR2I	POLR3E	PPAT	PWP1	SERBP1	SF3B3	SHQ1	SLC25A19	SNHG12	SNX5	SRPRB	TASP1	TIMM13	TRHDE	TRUB2	UMPS	UTP14A	WDR12	WDR46
Notch_T-ALL_up_Sharma	ACE	ARHGEF10L	BCAT1	CA12	CAD	CD82	CEPT1	CNTNAP2	CTNND2	DENND2D	DSP	DTX1	EGR1	GNL3	GRWD1	HES1	HEYL	HK2	HRB	IFI16	IL22	IL2RA	LOC644192	MDN1	METTL1	MYBBP1A	MYC	MYL4	NOL1	NOTCH1	NOTCH3	PPAN	PTCRA	RRS1	SHMT1	SRM
Notch_T-ALL_up_Weng	AHCY	B2M	CD3G	CD82	CDV3	CNBP	COPS6	CSDA	CTAGE5	DTX1	EIF4B	FABP5	FAM152B	FKBP5	GYG1	HES1	HEY1	HRB	ID2	IFI16	IGF2BP2	IGFBP6	IMPDH2	ISG15	LARS	LDHA	MTF2	MYC	NOTCH1	NOTCH3	PDGFRB	PFKL	PGK1	PKP4	PLA2G12A	POLD1	PRIM2	PRMT1	PTCRA	PTGES3	PTP4A3	PTPN22	RPL13A	RRM1	RSL1D1	SSRP1	TK1	TKT	TMEM131
Notch_T-ALL_up_concensus	CD82	DTX1	HES1	HEY1	HEYL	HRB	IFI16	IL2RA	LOC644192	MYC	NOTCH1	NOTCH3	PTCRA
OCAB_up	B4GALT1	CCND3	CDC37	KCNN4	LCK	S100A10
PAX5_repressed	ACADM	ADAMTS10	C13orf15	C14orf105	CAPN5	CCL3L1	CCR2	CD28	CD47	CMTM7	CST7	DGKD	DHRS3	DLX1	DUSP5	ELN	EMB	EMP1	FCER1G	FLT3	FUT8	FXYD5	GLT8D1	GPR97	GRAP2	GRIA2	H1F0	IFITM1	IGF2	IGJ	IL17RA	ITGAL	KCNN4	LCK	LEPROTL1	LILRB1	LMO2	LSP1	LY6D	M6PRBP1	MEF2C	MYL4	MYLC2PL	NCF4	NOTCH1	NUDT14	PARP1	PPP1R1C	PPP3CA
PGC-1alpha_overepxression_up	ATP5J	ATP5L	ATP5O	COX5B	COX6A2	COX7A1	COX7B	COX7C	CYC1	CYCS	NDUFA13	NDUFA2	NDUFA5	NDUFA7	NDUFA8	NDUFB3	NDUFB5	NDUFB6	NDUFC1	NDUFS2	NDUFS3	NDUFS5	SDHA	SDHB	UCRC	UQCRB	UQCRC1
PMBL_HL_high	ACTN1	AIM2	ARID5B	BATF3	CCL17	CCL5	CD200	CD58	CD59	CD97	CDKN1A	CSF1	CX3CL1	CYLD	DENND3	DENND4A	FAS	FBN1	FERMT2	FGFR1	GBP1	GOLM1	HOMER2	ICAM1	IER3	IFI35	IFI6	IFIT2	IL13RA1	IL15	IL2RG	IRF1	JAK2	JHDM1D	JUNB	LAMC1	LY6E	LY75	MAL	MSC	NCOA1	NCOA2	NFKB2	NFKBIA	NUP62	OAS3	PARP10	PDCD1LG2	PGRMC1
PMBLhigh_HLlow	ADA	CYBB	EVI2B	IL17RB	LMO2	TNFRSF17	TNFSF4
Pan_B_U133plus	ABCB4	ADAM28	AFF3	ALOX5	APBB2	BANK1	BCL11A	BCL7A	BLK	BLNK	C13orf18	C9orf45	CBFA2T3	CCDC4	CD19	CD1C	CD22	CD24	CD72	CD79A	CD79B	CIITA	CLCN4	CLLU1	COBLL1	COCH	COL9A3	CR2	CXCR5	DENND5B	DKFZP564O0823	DTX1	E2F5	EBF1	ELL3	FAM129C	FAM30A	FCER2	FCRL1	FCRL2	FCRL5	FCRLA	GATM	GNG7	HHEX	HVCN1	IL28RA	KBTBD8	KIAA0125
Pancreas_Node1629	CEL	CLPS	CPA1	CPB1	CTRB1	CTRB2	CTRC	ELA2A	ELA3A	ELA3B	GCG	GP2	INS	LOC100134294	PLA2G1B	PNLIP	PNLIPRP2	PRSS1	PRSS2	PRSS3	REG1A	REG1B	REG3A	SPINK1
Pituitary_lung_Node1582	CGA	CSH1	CSH2	CSHL1	GH1	GH2
Placenta_Node1337	ADAM12	ALPP	PSG1	PSG3	PSG9
Plasma_cell_gt_mature_Bcell	ABCG2	ARF3	CASP10	CCL3	CD38	CD59	CFLAR	COX15	CXCL2	CYP2E1	CYP51A1	ETV5	GFI1	GLA	GOLGB1	GPR109B	HCST	IER3	INSR	ITGA6	MGC29506	MMP9	OS9	PDIA5	PRDM1	PRDX4	RGS1	RRAGD	SDC1	SELPLG	SLAMF7	SLC1A4	SSR3	TIMP1	TNFAIP3	UPP1	VDR	WNT5B
Proliferation_DLBCL	AARS	ACO2	ACP1	ACTB	ACTG1	ACTG2	ACTL6A	ACTR2	ACY1	ADARB1	ADD3	ADSL	ADSS	AIFM1	AK2	AKAP1	AKAP10	AKT1	AKT2	ALDH18A1	ANKRD17	ANP32A	AOF2	AP1G2	APEX1	APRT	ARHGAP11A	ARHGAP19	ARL6IP1	ARPC2	ASNS	ASPM	ATAD1	ATE1	ATF4	ATG12	ATIC	ATP2C1	ATP5B	ATP5J	ATP5L	ATP5O	ATP6V0B	AUP1	AURKA	AURKB	BAG1	BAT2D1	BAT3
Proliferation_DLBCL_survival	GNL3	MYC	NPM3
Proliferation_Node1542	AKT1	AP2S1	AP3D1	ARHGEF18	ATPIF1	C1QBP	COPE	COX5A	CTBP1	DNMT1	LSM7	MRPS12	NDUFB7	NDUFC1	POLR2J	POLR2J3	PPP1CA	PRKCSH	PRMT1	PRR13	SDF4	SEC13	SF3B5	SLC25A11	SLC25A6	SMARCA4	TAPBP	U2AF1	UBE2L3	UQCRC1
Proliferation_Node1606	APRT	CLIC1	GLTSCR2	GNG5	HDAC1	HNRNPAB	HNRNPF	LOC402057	LOC642741	LOC728937	LOC730288	MBD2	NONO	OXA1L	P4HB	PABPC1	PABPC3	PDIA3	PLP2	PPIB	PTBP1	RPL12	RPL13	RPL13A	RPL18A	RPL29	RPL8	RPLP0	RPN2	RPS19	RPS2	RPS21	RPS3	RPS5	SEC61A1	SERP1	TAGLN2	UXT
Proliferation_Node1618	ANP32B	ASPM	BIRC5	BUB1B	CCNB1	CCNB2	CDC2	CDC20	CDCA3	CDCA8	CDKN3	CENPF	CENPM	CKS2	DTL	ESPL1	EZH2	FANCI	FOXM1	GINS2	H2AFZ	HJURP	HMGA1	HMGB2	HMMR	KIAA0101	KIF20A	KPNA2	LBR	MAD2L1	MCM2	MCM4	MCM5	MCM7	MELK	MLF1IP	MRPL42	NCAPG	NCAPH	NDC80	NUP62	NUSAP1	ODC1	PBK	PCNA	PRC1	PSME4	RANBP1	RRM2
Proliferation_Node1640	ACTR3	ANKHD1	BUB3	CBX3	CCT6A	CCT8	CROP	CSE1L	DARS	DDX50	DEK	DHX15	DNAJC2	EIF3A	EIF3E	EIF3M	EXOSC8	FXR1	GTPBP4	HAT1	HMGB1	HMGN1	HSP90AA1	HSPA4	JOSD3	MATR3	MBD4	METAP2	MTHFD2	MTIF2	NASP	NKTR	NPM1	PIP5K3	PNN	PSMA3	PSMC6	RAN	ROCK1	RPL11	RPL17	RPS7	SERBP1	SMARCE1	SNRPD1	SNRPD3	SRP72	SSB	SSBP1
Quiescence_heme_all	ABTB1	ADAM8	ADD3	ADH4	ADPGK	AES	AHNAK	AKNA	AOAH	AP3D1	ARHGAP25	ARHGAP27	ARHGAP9	ARID4B	ARL4C	ARL6IP5	ARMC5	ARPC4	ATG12	ATP2A3	ATP6V0E1	ATR	B2M	B3GALT4	BCAP31	BICD2	BIN1	BIN2	BIRC2	BRAP	BRD2	BTG1	C20orf24	C2orf28	C2orf68	C3orf19	C3orf63	C6orf62	C7orf26	CAB39	CALM1	CAMK1D	CAP1	CASP4	CCDC120	CCDC128	CCDC88B	CCNDBP1	CD44
Quiescence_heme_cluster1	ABTB1	ADAM8	ADD3	ADPGK	AHNAK	AKNA	AOAH	ARHGAP25	ARHGAP27	ARHGAP9	ARL4C	ARL6IP5	ARPC4	ATP6V0E1	B2M	B3GALT4	BCAP31	BICD2	BIN1	BIN2	BTG1	C20orf24	C2orf68	CALM1	CAP1	CASP4	CCDC88B	CD44	CD52	CD97	CENTB2	CHKB	CLEC2B	CMTM7	COL4A3BP	CSGALNACT1	CTDSP1	CTSO	CYBA	CYTH4	DAZAP2	DHRS7	DKFZP434B0335	DOCK11	DOK2	DPEP2	ELK3	EMP3	EVI2B
Quiescence_heme_cluster2	AP3D1	ARMC5	ATG12	ATP2A3	BIRC2	BRAP	BRD2	C2orf28	C3orf63	C6orf62	C7orf26	CAB39	CAMK1D	CCDC120	CCDC128	CCNDBP1	CEP350	CSGLCA-T	CYP20A1	DDX46	DDX5	DKFZp547I224	DUSP23	DYRK1A	EDF1	EHBP1L1	EIF5	EP300	EPC2	EXOC3	FAM21B	FAM21C	FAM58A	FASTK	FBXL3	FOLR1	GMEB1	GTF3A	HEATR1	HNRNPAB	HNRNPK	KIAA0430	KIAA1012	KLHL21	KTELC1	MAPRE2	MAT2B	MED29	MGA
Quiescence_heme_cluster3	ADH4	CNOT8	FBXO9	FLOT2	FOXO3	KLF13	LGI3	2016-03-08	RSU1	SERINC3	TARSL2	VEZF1
Regulatory_T_cell_McHugh_Herman_concensus	CD2	CISH	GADD45G	GBP4	GLRX	GZMB	IL10	IL2RA	LGALS1	LY6E	MDFIC	NCF4	RRM2	S100A10	S100A6	TNFRSF18	TNFRSF4	XBP1
Regulatory_Tcell_FOXP3+_3x_gt_CD4+Tcell	C1orf130	CCR8	CD80	DST	FAM55B	FOXP3	IKZF2	IL10	IL1RL1	ITGAE	ITIH5	KLRG1	LAMC1	LYCAT	MATK	NEB	PARD6G	PATL2	PGLYRP1	PSG9	RAPGEF5	SLC2A3	STON1	SWAP70	SYTL1	SYTL2	TACSTD1	TPR
Regulatory_Tcell_FOXP3+_4x_gt_CD4+Tcell	C1orf130	FAM55B	FOXP3	IKZF2	ITGAE	KLRG1	LAMC1	MATK	NEB	TACSTD1	TPR
Resting_blood_B_cell_GNF	ABCB4	ADAM28	ADK	AIM2	AKAP2	ARMC3	BANK1	BIRC3	BLK	C1QTNF7	C1orf165	CACNA1A	CCR6	CD19	CD200	CD22	CD24	CD37	CD40	CD72	CD79A	CD79B	CNTNAP2	CORO2B	CR2	CXCR5	EBF1	EZR	FADS3	FAM30A	FCER2	FCRL1	FCRL2	FCRLA	GYLTL1B	HIP1R	HLA-DOB	HRK	HVCN1	ID3	IFT57	IGHG1	IL4R	KCNG1	KIAA0040	LARGE	LCN6	LOC100133678	MAP4K2
Resting_blood_NK_cell_GNF	ADAMTS1	APOL1	CCL4	CD160	CD300A	CST7	DLG5	DLL1	DMKN	FCGR3B	FCRL6	FEZ1	FSD1	GNGT2	GNLY	GNPTAB	GPR56	GZMH	HOPX	IFI16	IGFBP7	IL18RAP	IL2RB	IL8RA	KIR2DL1	KIR2DL2	KIR2DL3	KIR2DL5A	KIR2DS1	KIR2DS2	KIR2DS4	KIR2DS5	KIR3DL1	KIR3DL2	KIR3DS1	KLRD1	KLRF1	LAIR2	LOC100129913	LPCAT1	LYPD2	MAFF	MMP23B	MPPE1	MYOM2	NCAM1	NCR1	NKG7	NMUR1
Resting_dendritic_cell_GNF	AHI1	ALOX5AP	AP1S3	APP	ATP13A2	BIK	C10orf118	C10orf58	C1orf186	C20orf103	C5orf32	C7orf58	C9orf127	CCDC50	CIB2	CLN8	COBL	CSF2RB	CUX2	CYP46A1	DUSP3	DUSP5	ELL	EPHA2	EPHB1	FCER1A	FLJ42627	FLNB	FLT3	FUT4	FUT7	GAS6	GSN	GUCY2D	HLA-DRB1	HLA-DRB4	IDH3A	IGFBP3	IL3RA	IRF4	IRF7	IRF8	ITM2C	KCNA5	KCNK10	KCNK17	KCTD19	KCTD5	KIAA1274
Resting_monocyte_GNF	AGPAT9	AIF1	ALDH3B1	ANXA2	APLP2	APOBEC3A	AQP9	ASAH1	ASGR1	ASGR2	BPI	BST1	BTBD14A	C11orf75	C19orf38	C5AR1	CASKIN1	CCR1	CD14	CD163	CD1D	CD300LB	CD33	CD93	CDA	CEBPA	CEBPB	CEBPD	CENTA2	CFD	CFP	CHST7	CITED4	CKAP4	CLU	COTL1	CPNE9	CRISPLD2	CSF1R	CSF3R	CSTA	CTSS	CYP1B1	CYP27A1	DHX57	DMXL2	DPYD	DUSP1	DUSP6
Resting_panT_cell_CD4+CD8+_GNF	AKTIP	ANKRD36B	ATHL1	ATM	ATXN7	BCL11B	C1orf56	C1orf63	C21orf96	C6orf190	CAPS	CBR4	CD28	CD3D	CD3E	CD40LG	CD44	CD6	CDC14A	CDR2	DGKA	DOCK10	ENO2	EPHX2	FAM113B	FBLN5	FLT3LG	GIMAP5	GOLGA8A	GOLGA8B	GPR171	GPRASP1	GSDMB	HIST1H3D	ICOS	IKZF1	IL7R	ITGA6	LDLRAP1	LEF1	LOC129293	LOC653188	LOC730092	LRRN3	LTBP3	MOV10	MTRF1	N4BP2L2	NELL2
Reticulocyte_large	ACTB	ADIPOR1	ALAS2	ALS2CR2	ATP5E	ATP6V0C	BCL2L1	BLVRB	BNIP3L	BPGM	BSG	BTF3	C19orf22	C1orf128	C20orf108	CA1	CAT	CCNDBP1	CSDA	E2F2	EIF1	EIF2AK1	EPB41	EPB42	EPB49	FAM104A	FAM46C	FBXO7	FBXO9	FECH	FOXO3	FTH1	FTHP1	FTL	GABARAP	GABARAPL2	GLRX5	GLUL	GNAS	GPX1	GSPT1	GUK1	GYPB	GYPC	HBA1	HBB	HBD	HBG2	HBM
Reticulocyte_small	ALAS2	ALS2CR2	BNIP3L	C19orf22	FAM46C	FBXO7	FTL	HBA1	HBB	HBG2	HBM	NCOA4	OAZ1	PL-5283	SLC25A37	SLC25A39	SNCA	TPT1	UBA52	UBB
Ribosomal_protein	NUDCD3	RPL13	RPL27	RPL37	RPL37A	RPLP0	RPLP1	RPS16	RPS2	RPS20	RPS21	RPS25	RPS27A	RPS3A	RPS5	RPS6	RPS9	RPSA	TSPAN4
SREBP1a&2_up_Scap_dep	AACS	ACACA	ACLY	ACSS2	AKAP9	ALDOC	CYB5B	DHCR7	ELOVL6	FASN	FDFT1	FDPS	HMGCR	HMGCS1	HSD17B7	IDI1	INSIG1	LDLR	LSS	ME1	MID1IP1	MVD	NSDHL	PCSK9	PMVK	RDH11	SC4MOL	SC5DL	SQLE	SREBF1	STARD4	TM7SF2	TMEM97
SREBP1a&2_up_Scap_indep	ABCG5	ABCG8	ACSL3	ALDH1A1	AQP8	BLVRB	CBR1	CHRNA4	CORO1C	CYP2C18	DPYSL2	FAM126A	FAM62B	GSTM3	KLF16	LOC153364	NFE2	ORM2	PLTP	PSTPIP2	RNF146	SCD	SLC25A37	TREX2
SREBP1a_up	ACACB	ACSL4	ACSL5	CSAD	ECHDC1	EHHADH	FADS1	FADS2	GSTM4	HSP90B1	MFSD1	PDK1	SCD	THRSP
SREBP2_up	C14orf1	GP2	HES6	MVK	REG1B	SC5DL	SOD2	TFF3	TM7SF2
STAT3_up_OCILy10	AIM2	ARHGEF6	BANK1	BCL6	BIC	BIRC2	BIRC3	C14orf143	CD14	CD36	CXCL13	DHRS9	DUSP1	FUT8	GCA	GLRX	GNG10	GPR183	HIF1A	ID2	IFNGR1	IL10	IL2RB	ITM2B	JUN	KLHL6	LILRB1	2016-03-01	MNDA	PHLDA1	PRDM1	PSMB9	PTPN2	RHOH	SAMSN1	SATB1	SNX9	SOCS2	ST8SIA4	STAT3	STK17A	TANK
STAT3high_ABC_DLBCL_subgroup	ACTG2	ARPC2	AURKA	BANK1	BCL2A1	BCL3	BIC	BIRC2	BIRC3	C5AR1	CAMK2D	CD40	CD44	CD53	CDC123	CHEK1	CSK	CSNK2A1	CTH	CTSL1	DENND3	DHRS9	DOK1	DUSP5	EIF2S2	EIF4E	EIF5	ENO1	FAS	FERMT2	FLI1	FTSJ1	FUT8	GLRX	GNAI3	GNB1	GNB2	GPR183	HCK	HIF1A	HN1	ID2	IL21R	IL2RA	IMPDH1	ITGB1	JAK1	JUN	JUNB
STAT3low_ABC_DLBCL_subgroup	BCL2	BCLAF1	DGKA	TNK2
Salivary_secretory_gland_Node1603	HTN1	HTN3	MUC7	PIP	PRB1	PRB3	PRB4	PRH2	PRR4	SMR3A	SMR3B	STATH
Serum_response_Fb_down	ACTL6A	ADAMTS1	ADCY3	ALKBH7	BCCIP	BRCA2	BRIP1	C11orf24	C12orf24	C13orf1	C13orf27	C16orf61	C18orf24	C19orf48	C3orf26	CBX1	CCT5	CDCA4	CDK2	CENPJ	CENPN	CEP78	CHEK1	CKLF	COPS6	COQ2	CORO1C	COTL1	CRAMP1L	DBF4	DBNDD1	DCBLD2	DCK	DCLRE1B	DHFR	DLEU1	DLEU2	DUT	DYNLT1	EBNA1BP2	EEF1E1	EIF2AK1	EIF4EBP1	EIF4G1	EMP2	ENO1	EPHB1	ERLIN1	EXOSC8
Serum_response_Fb_up	ABHD14B	ACCS	ACIN1	ACSL3	ACSS2	ADD3	ANKRD12	APOD	APP	ARHGAP12	ARHGEF3	ARID5B	ARMCX3	ARPC4	ARSD	ATP6V0A1	AXIN2	BBC3	BCL6	BDH2	BHLHB2	C10orf10	C10orf26	C10orf33	C17orf58	C1S	C1orf198	C20orf108	C4orf18	C4orf34	C5orf4	C5orf41	C7orf58	CALCOCO1	CAMLG	CCNG2	CCNL2	CCPG1	CD46	CD82	CDC14B	CDC2L2	CDKN1A	CDKN1C	CFB	CLCN6	CLIC2	CNTNAP1	CPM
Splenic_Marginal_zone_Bcell_gt_naive_and_GC_Bcell	ADAR	CASP1	CCDC50	CD1C	CD24	CTSB	DLEU1	FCRL2	FCRL3	GNPDA1	HIST1H2AC	HIST1H2BK	IFI44	ISG15	LEPROTL1	MARCKS	NCRNA00084	OAS1	PARP9	PHKB	PTPN12	TNS3
Splenic_marginal_zone_Bcell_gt_GC_Bcell	ANKZF1	APOL3	ARL4C	BCL2	CASP1	CASP4	CBLB	CCDC50	CCL4	CD1C	CD1D	CD24	CD44	CD6	CEPT1	CLEC2B	CR1	CR2	CTSB	DLEU1	DTX4	FAM129C	FCRL2	GBP2	GNPDA1	GPX7	HIST1H2AC	HK2	IFI44	IFIT1	IGF2R	IL24	IL6	IRF9	ISG15	ITM2B	LEPROTL1	MPEG1	OAS1	PARP9	PDHA2	PHKB	PTEN	PTPN12	S1PR1	SCARB2	SLA	SLC2A3	SYTL2
TGFbeta_down_epithelial_large	ADRB2	BIRC3	BMP4	C13orf15	CEBPD	CITED2	CYP1B1	HS3ST1	ID1	ID2	ID3	IL1B	LDLR	MYC	PTGER4	RRS1	SERTAD2	SPRY2	TXNIP	UGCG
TGFbeta_down_epithelial_small	BIRC3	C13orf15	CITED2	ID1	ID2	ID3	IL1B	MYC	SERTAD2	UGCG
TGFbeta_up_epithelial_large	ADAM19	ANGPTL4	ARHGEF18	ATF3	BHLHB2	BMPR2	CDKN1A	CDKN2B	CGB	COL4A1	CTGF	CYP26B1	DLX2	EPHB2	ETS2	FSTL3	GADD45B	GRB10	IGL@	IL11	ITGA5	ITGB6	JAG1	JUN	JUNB	MAP3K4	MN1	NEDD9	NKX3-1	P2RY2	PIM1	PLAU	PMEPA1	SERPINE1	SGK1	SKIL	SLC19A2	SMAD7	SMURF1	SMURF2	SOX4	SPHK1	ST3GAL1	TBX3	TUFT1	VDR	VEGFA	WNT5B
TGFbeta_up_epithelial_small	ANGPTL4	BHLHB2	CGB	CTGF	DLX2	EPHB2	MN1	NEDD9	P2RY2	SERPINE1	SKIL	SMAD7	VEGFA
T_NK_Node1604	CCL5	CD2	CD247	CD3D	CD3G	CD7	CTSW	FAIM3	GNLY	GZMH	IL23A	IL7R	LAT	LCK	PRF1	SH2D1A	TARP	TRA@	XCL2	ZAP70
T_NK_Node5808	CD160	CD28	CD6	CD8A	CD8B	CD96	GIMAP5	GPR171	IL18RAP	KIR3DL2	KLRD1	KLRF1	MAF	PTGDR	RORA	SH2D1A	SIRPG	SPON2	SYNE2	XCL1
T_cell	CD2	CD247	CD3D	CD3E	CD3G	CD5	CD6	CTLA4	FYB	LAT	PRSS1	SH2D1A	THPO	TRA@	ZAP70
T_cell_up_ionomycin_anergy	CASP3	DGKA	FASLG	GBP4	IKZF1	JARID2	LDHA	PTPN1	PTPRK	PTPRS	RAB10	RGS2	SLC3A2	TLE4	TNFRSF9	TRAF5
Tcell_PIind4x_CsAindependent	DUSP2	DUSP5	EI24	FLJ43663	FOS	GPR183	GZMH	IL2RA	IL6	NAB2	NFKB2	ODC1	POU2F2	QSOX1	RELB	RGS16	SGK1	SNX9
Tcell_PIind4x_Feske_Fig4	AIM1	AIM2	BAG3	BCAR3	BCL2A1	BIC	BIRC3	BTG2	BZW1	CCL3	CCL4	CD200	CD4	CD44	CD69	CD83	CDK6	CDKN1A	CFLAR	CSF1	CSF2	CTLA4	DUSP6	EIF2C2	ELL2	EVI2A	FAM3C	FASLG	FOS	FOSL2	FOXP1	GADD45B	GEM	GPR183	IER3	IL10	IL13RA1	IL2	IL21R	IL4	IL8	INSIG1	IRF4	ITGA6	KITLG	KLF10	LARP2	LIF	LRRC8B
Tcell_PIind4x_Feske_Fig6	AIM1	AIM2	ATF3	BACH2	BCL2A1	BCL2L1	BIC	BIRC3	BTG2	BZW2	CALD1	CCL3	CCL4	CD200	CD4	CD40LG	CD44	CD55	CD72	CD83	CDK6	CFLAR	CHD1	CSF1	CSF2	CTLA4	DDX21	DUSP2	DUSP5	DUSP6	EIF2C2	ELL2	ETV3	FASLG	FOS	FOSB	FOSL2	FYN	GEM	GNG4	GPR18	GZMB	ICAM1	IER3	IFNG	IL10	IL13	IL2	IL21R
Tcell_PIind_CalciumDefPtdown4x_Feske_Fig4	AIM1	ANKRD44	BCAR3	CAMK2D	CCL3	CCL4	CD4	CD48	CDK6	CFLAR	CSF1	DAPP1	DUSP6	ELL2	EVI2A	FASLG	FOSL2	GNAS	H3F3B	HIST1H2AC	IL10	IL2	IL4	IL8	IMPDH1	JUN	LIF	LTA	MAOA	MAP3K8	MAPK1	MAST4	MBNL1	MDFIC	MYC	N4BP2	NAMPT	PELI1	PGAM1	PMAIP1	PPP1R15B	PTPN1	QSOX1	RAN	RHOH	SCD	SESN3	SIAH2	SLA
Tcell_PIind_CalciumDefPtdown4x_Feske_Fig6	AIM1	AREG	ATF3	BIRC3	CAMK2D	CCL20	CCL3	CCL4	CD200	CD24	CD27	CD40LG	CD55	CD72	CD83	CDK6	CFLAR	CSF1	CTLA4	EIF2C2	ELL2	ETV3	FLT1	FOS	FOSB	FOSL2	GCA	GEM	GNAS	GPR18	GZMB	IER3	IL10	IL18R1	IL2	IL21R	IL4	IL6ST	IL8	IRF4	JUN	KLF9	LIF	MAP3K8	MAPK1	MAPKAPK2	MAPRE2	MICA	MYC
Tcell_PIind_CsAdown4x	AIM1	AREG	BIRC3	CAMK2D	CCL4	CD200	CD24	CD40LG	CD72	CD83	CFLAR	CSF1	ELL2	ETV3	FLT1	FOS	FOSB	FOSL2	GNAS	GPR18	GZMB	HSPA1A	IL10	IL13	IL18R1	IL2	IL21R	IL4	IL6	IL6ST	IL8	IRF4	IRF8	JUN	KLF9	LIF	MAP3K8	MAPK1	MAPKAPK2	MDFIC	MPO	MYC	NR4A2	NR4A3	PELI1	PGAM1	PPP1R2	PRNP	REL
Tcell_PIrep4x_CsAindependent	ADA	CDKN2C	FADS1	MCM2	MXD3	SUSD3	TOX	TXNIP	UNG
Tcell_PIrep4x_Feske_Fig4	ACTB	ATM	BMF	CLIP1	FAM102A	HMGB2	IL16	IL9R	ITGAL	KIAA1370	LCK	LOC284561	MGEA5	MX1	NLRC3	PCNA	PDCD4	RPS6KA5	SIT1	SKAP1	SNAP25	SP100	TMC8	TOX	TUBB	TXNIP
Tcell_PIrep4x_Feske_Fig6	ACTB	ACTG1	ADA	ATM	ATP2A3	BAD	BIRC5	CCR1	CCR5	CDC25B	CDK2	CDKN2C	CENPF	CISH	CORO1A	CYFIP2	FAM102A	FYB	GLIPR2	GNAI2	HMGB2	HMMR	IL16	IL32	IL9R	ITGAL	ITGB7	KIF23	LCP1	LIMD2	LY6E	MCM2	MCM7	MXD3	NLRC3	PCNA	PLK1	PRKACA	PRKACB	PSMB9	RB1	RBL2	RCBTB2	RFC4	RGS9	RNF144A	RPA1	SIPA1	SMARCA2
Tcell_PIrep_CalciumDefPtup4x_Feske_Fig4	ATM	BMF	CXCR4	EML4	FAM102A	IL16	IL9R	IRF1	ITGAL	ITGB2	KIAA1370	LCK	LOC284561	N4BP3	NKTR	PPP3CA	RGS1	SELE	SIT1	SNAP25	SQRDL	STAT1	SYTL2	TMC8	TRERF1	TXNRD1	ZFP36L2
Tcell_PIrep_CalciumDefPtup4x_Feske_Fig6	ARMET	ATM	BMF	CAMK1	CCR1	CCR5	CD53	CISH	CKLF	CLEC2B	CORO1A	CYTIP	DAPK2	DENND1B	EGR1	EML4	FYB	IFI44L	IKBKE	IL16	IL9R	ISG15	ITGAL	ITGAM	ITGB2	ITGB7	LCK	LCP1	LIMD2	LTB	NEK6	NFATC3	NLRC3	PPP3CA	PRKACB	PRKCI	RCBTB2	RPA1	SP110	ST6GAL1	TMC8	TRAT1	TSPAN17	TUBB	TXNIP	UPP1	ZNF24
Tcell_PIrep_CsAup4x	CAMK1	CCR1	CCR5	CD53	CKLF	CORO1A	CXCR4	DAPK2	IL16	IL9R	ITGAL	ITGB2	ITGB7	NFATC3	PPP3CA	PRKACB	PRKCI	RGS1	ST6GAL1	TRAT1	TSPAN17
Tcell_cytokine_induced_Bcell_induced	CEACAM1	CYTIP	FAM102B	HOMER2	PAK1
Tcell_cytokine_induced_IL2_IL7_IL15_IL4	BCL2	CASP3	CD69	CISH	CSF1	CSF2	CXCR4	DARS	DPP4	DUSP6	IL18R1	SNX10	SOCS1	TAC4	XBP1
Tcell_cytokine_induced_IL2_IL7_IL15only	ADAM19	AHR	CCL3	CCL4	CCND2	CDK6	CEACAM1	DUSP5	FLT3LG	GARS	IL2RA	LIF	LTA	MDFIC	MLLT3	MX1	PIM1	PMAIP1	RGS16	TNF	TNFSF10	UPP1	WARS
Tcell_cytokine_induced_IL4only	CAMK2D	FAM102B	HOMER2	IL4R	MAL	SPINT2
Tcell_cytokine_induced_PBMC_Bcell_nochange	CAMK2D	CCR2	CXCR4	DPP4	E2F4	EIF2AK2	FLT3LG	GZMA	IFITM1	IL18R1	MAL	MFHAS1	MLLT3	MMD	MX1	NCOA3	PDE4B	PTP4A1	PTPN9	RALB	RPS6KA5	SAMHD1	SNX10	SPINT2	ST13	TNFSF10	TOX	XBP1
Tcell_cytokine_induced_PMBC_Bcell_induced	ACTG1	BCL2	BHLHB2	BIC	CCL3	CCL4	CCND2	CCR1	CREM	CSF1	DARS	DNAJC3	DUSP5	FOSL2	GBP1	GPR183	HSPA5	ICAM1	IL2RA	IRF4	MDFIC	OAT	PPP1R15B	PRNP	RGS16	SAMSN1	SGK1	SLAMF1	TNF	WARS
Tcell_cytokine_induced_PMBConly_Iinduced	ACTB	ADAM19	AHR	APOBEC3F	ARL4C	ATF4	CASP3	CBFB	CCR1	CD53	CD55	CD69	CISH	CSF2	CSF2RB	CXCR4	DUSP6	GEM	IL4R	KLF6	LCP2	LIF	LTA	NDUFV2	PARP14	PIM1	PMAIP1	PTPN7	SOCS1	SOS1	STAT1	STAT4	TAC4	TNFRSF1B	TNFSF13	TOP1	UBE2L6	UPP1	VIM	XCL1	ZBED2
Tcell_cytokine_induced_prolif	ARMET	C1QBP	CDK6	CTPS	CYP2B6	ENO1	GARS	GNG10	GOT1	GSTO1	HSP90AA1	ID2	IER3	ISG15	MAPKAPK3	MAT2A	MTHFD1	NAMPT	NME1	NOLC1	PA2G4	PAICS	PRMT1	TXN	TXNRD1	UCK2	YES1
Tcell_cytokine_repressed	ADA	BMF	CAMK4	CCR7	CD27	CDC25B	CYTH4	DPEP2	EPHB6	F5	FAM102A	FYB	GRAMD1A	HIST1H2AC	HVCN1	ID3	IL24	ITGAX	ITGB7	KIAA1370	KLRC4	LGMN	LRMP	NLRP1	PASK	PBXIP1	PDCD4	PMS2	PTPRN2	RPS15A	SELL	SORL1	STK38	TCF7	TRIB2	TSC22D3	VNN2	ZFP36L2
Testis_Node1662	ACTL7A	ACTL7B	AKAP3	AKAP4	ANKRD7	C1orf175	CABYR	CCIN	CITED1	CREM	CRISP2	DDX4	DKFZP566E164	DKKL1	DNALI1	DPEP3	GAGE12F	GAGE12I	GAGE4	GAGE5	GAGE6	GAGE7	GAPDHS	GPR135	GSG1	GSTM3	INSL3	JMJD2D	LOC81691	LRRC50	MLF1	MS4A5	NME5	OAZ3	ODF1	ODF2	PGK2	PHF7	PPP1R2P9	PRM1	PRM2	PRND	RIBC2	ROPN1B	SAMD4A	SMCP	SOX5	SPAG6	SPANXB1
Thymic_DP_Tcell_gt_Thymic_SP_CD4+Tcell	ACSBG1	ADA	AEBP1	AKAP2	ARPP-21	BCL2L1	C12orf65	C14orf145	C17orf67	C18orf1	C2orf67	C9orf103	CASC5	CBFA2T3	CCDC88A	CD1A	CD1B	CD1C	CD1D	CD1E	CD8A	CD8B	CD99	CEP70	CHD1	CHRNA3	CIB2	CPLX1	CPVL	CXXC5	DAPK1	DEPDC1	DNMBP	E2F7	ECOP	ECT2	EFNB2	FAIM	FBXL12	GAB2	GALNT2	GFI1	GNA15	KIAA0182	LANCL2	LETM1	LOC100131998	LOC202781	LOC283454
Thymic_DP_Tcell_gt_Thymic_progenitor_Tcell	ACSBG1	ADORA2A	AKIRIN2	ARHGEF7	BCL6	C13orf15	C9orf103	CALN1	CCR9	CD52	CD8A	CD8B	CENTD1	CIB2	COL6A3	CPLX1	CUGBP2	DNMBP	ECOP	EDEM1	EGR1	ELK3	EPB41	EPHX2	EVI2A	FAIM3	FAM101B	FRY	INSIG2	ISG20	ITPKB	KAT2B	KBTBD11	LBH	LOC284757	LRRC16A	LTB	LYST	MAML2	MGC40069	MITF	MTSS1	NFATC3	PCSK5	PLCXD2	RALGPS1	RASD1	RASSF6	RBM35B
Thymic_SP_CD4+Tcell_gt_Blood_CD4+Tcell	AUTS2	BCAT1	BCL11A	BCOR	BTBD3	C4orf31	C5orf13	C6orf173	CCR9	CCRL2	CD1A	CD1B	CD200	CD93	CDK2AP1	CENTD1	CHI3L2	CHST2	CKAP2	CLDN1	CMPK2	COL6A3	CORO1C	CREM	CTA-221G9.4	CTSL1	CXXC5	DAPK1	DPPA4	DUSP2	DUSP6	EGR1	EGR3	ENC1	FLJ22536	FLJ36840	GNB4	GSTA4	HIST1H2AC	HPGD	HTR2B	ICOS	IDH2	IFI44L	IGF2BP3	IRAK2	ITM2A	JARID1B	KLF10
Thymic_SP_CD4+Tcell_gt_Thymic_DP_Tcell	ABLIM1	ACTN1	AMICA1	ANK3	ANKRD55	BAG3	BTLA	BTN3A3	C20orf118	C4orf31	CACHD1	CAMSAP1L1	CCR7	CD27	CD44	CD55	CISH	CLDN1	CLEC2D	COTL1	CTSL1	CYLD	CYTIP	DDX60	DENND2D	DHRS3	DNAJC16	EMP3	EPAS1	FAM91A2	FOXO1	GALNAC4S-6ST	GALNT11	GBP1	GBP2	GIMAP4	GIMAP5	GIMAP7	GIMAP8	GOLGA8A	GPR171	GPR183	GPR65	GSTA4	HCP5	HLA-A	HLA-B	HLA-C	HLA-E
Thymic_progenitor_Tcell_gt_Thymic_DP_Tcell	ARMCX1	C12orf32	C13orf18	C4orf32	CFH	CISH	CTNND1	FXYD2	GSTM3	GUCY1A3	HES1	HIVEP3	IFI44	IFI44L	IGJ	KCNK17	MDFIC	MEST	MPEG1	PLAC8	PRKCA	RGPD1	RGPD5	RRAS2	RSAD2	SCN3A	SELL	SOCS2	TLR7	TNFSF4
XBP1_target_all	ACSS1	ALDH1A1	ARF3	ARMET	ATP2A2	BMP6	CD81	CDKN3	COPE	COX15	CREBL1	CST3	DAD1	DDOST	DEGS1	DNAJB9	DNAJC10	DNAJC3	EDEM1	ERGIC1	FKBP14	FNBP1	FTL	FTSJ1	GCS1	GLRX	GPR89B	HERPUD1	HM13	HSP90B1	HSPA5	ISG20	ITGAM	ITGB5	LIPA	LMAN1	MCFD2	MGAT2	MGC29506	OS9	PDIA3	PDIA4	PDIA5	PLOD1	PPIB	PPP2CB	PRDX4	RABAC1	RBM7
XBP1_target_other	ACSS1	ALDH1A1	ARMET	BMP6	CD81	CDKN3	COX15	CREBL1	CST3	DEGS1	FNBP1	FTL	FTSJ1	GLRX	GPR89B	ISG20	ITGB5	LIPA	MGC29506	PPP2CB	PRDX4	RBM7	RNASE4	SLC1A4	SLC3A2	SLPI	SPOP
XBP1_target_secretory	ARF3	ATP2A2	COPE	DAD1	DDOST	DNAJB9	DNAJC10	DNAJC3	EDEM1	ERGIC1	FKBP14	GCS1	HERPUD1	HM13	HSP90B1	HSPA5	ITGAM	LMAN1	MCFD2	MGAT2	OS9	PDIA3	PDIA4	PDIA5	PLOD1	PPIB	RABAC1	RHOQ	RPN1	SEC23B	SEC24C	SEC61A1	SEC61G	SLC30A5	SLC33A1	SPCS3	SRP54	SRP9	SRPR	SSR1	SSR3	SSR4	ST6GALNAC4	SYVN1	TMED10	TRAM1	TXNDC5	UAP1	USO1
p53_up_Xray	BTG1	BTG2	CCNG1	CDKN1A	DDB2	ENC1	FAS	IER5	MDM2	PCNA	PMAIP1	PPM1D	PRKAB1	RRM2B	TRIM22	XPC
p53_targets	VDR	VCAN	UBD	TYRP1	TSC2	TRPM2	TRIM22	TRIAP1	TP73	TP53INP1	TP53I3	TP53	TNFRSF10D	TNFRSF10C	TNFRSF10B	TNFRSF10A	TGFA	TAP1	STEAP3	SLC38A2	SH2D1A	SFN	SERPINE1	SERPINB5	SCN3B	SCD	SCARA3	S100A2	RRM2B	RPS27L	RNF144B	RFWD2	RB1	RABGGTA	PYCARD	PTK2	PTEN	PRKAB1	PRDM1	PPM1J	PMS2	PML	PLK3	PLK2	PERP	PCNA	PCBP4	P2RX6	ODC1
NFkB_Targets	GSTP1	B2M	ALOX12	IRF2	C4BPA	CASP4	CD40	ABCB1	PLA2G4A	PTX3	HAS1	PDYN	CTSL2	CRP	TNF	IL1A	SELP	PTGS2	IL1RN	CD209	LAMC2	MADCAM1	ELF3	AMH	SCNN1A	LTA	CCL3	SLC2A5	TNFRSF9	BCL2	TACR1	STAT5A	ARFRP1	IL8	AGER	CD83	IL15RA	MYC	CXCL2	HBE1	TNFRSF21	IRF1	FAS	TAPBP	VEGFC	VIM	CXCR5	PSMA2	FASLG
NFkB_Targets_Young.Lab	ABCB1	ACCN1	ADH	ADORA1	AFP	AGER	AGPAT1	AGT	ALOX12	AMH	APOC3	APP	AR	ARL1	B2M	BCL2	BCL2A1	BCL2L1	BCL2L10	BDKRB1	BF	BIRC2	BIRC3	BMP2	C2	C3	C4A	CALCA	CARD15	CASP4	CCL1	CCL11	CCL15	CCL19	CCL2	CCL21	CCL22	CCL23	CCL28	CCL3	CCL4	CCL4L	CCL5	CCND1	CCR5	CCR7	CD209	CD3G	CD48
Foxp1_Targets	2016-09-09	AASDHPPT	ADAM29	ADRM1	AKT1S1	ALG10	AMY1A	APBB1IP	ATF5	ATF6	BAT4	BCLAF1	BIK	BTG1	BUB3	BXDC5	C12orf30	C1orf119	C1orf138	C22orf26	C2orf17	C3orf38	C5orf14	C5orf33	C7orf11	C7orf30	C7orf49	C8orf41	CALM2	CBLL1	CBX3	CD37	CD55	CEP68	CFLAR	CHMP2B	CIRH1A	CITED2	CKAP2	COPG	COX7C	CRADD	CSNK2B	CTDSP2	CXXC4	DAZAP2	DCAKD	DHTKD1	DHX40
Myc_Targets	ABCB10	ABCB6	ABCC4	ABCE1	ABL1	ABT1	ACAD8	ACADM	ACE	ACHE	ACO2	ACOX1	ACOX3	ACP5	ACPP	ACTG1	ACTR3	ACYP2	ADAM22	ADAM9	ADCY9	AGPS	AHCY	AHCYL1	AHSG	AK3	AKAP1	AKAP10	AKAP9	AKR1A1	AKR7A2	ALDH2	ALDH9A1	ALG5	ALOXE3	AMD1	AMMECR1	AMPD2	AMPD3	AP4B1	AP4E1	AP4M1	AP4S1	APBA3	APC	APEX1	APP	AQR	ARF1
BCL6_target_ChIPseq	ZEB2	ZEB2	TBL1XR1	ZEB2	MBNL3	RNASEH2B	RNASEH2B	NEK7	SNX5	KLF12	HEXIM1	RHOH	MYC	FLJ43663	TNFAIP8	VPS35	MIR941-2	ZNF608	GPR18	DUSP5	SNX5	ORC6L	C14orf43	C20orf72	MIR941-3	KIAA0922	GPR18	KIAA0922	IRF8	CSPP1	PPIA	ARID5B	NFATC3	WNT5A	PTPRC	RUNX1	BTG2	DTL	SGCE	MLKL	TIPARP	ANKRD12	LSR	RASGRP3	CDCA7L	RUFY1	CSPP1	LNPEP	RBMS3
BACH2_target_ChIPseq	2016-03-01	2016-03-06	2016-03-07	2016-03-09	2016-09-01	2016-09-02	2016-09-06	2016-09-07	2016-09-11	2016-09-12	2016-09-13	5_8S_rRNA	5S_rRNA	7SK	A4GALT	AAAS	AAGAB	AANAT	AARS2	AASDH	AB019437.11	AB019437.15	AB019437.19	AB019437.23	AB019437.30	AB019437.8	AB019438.29	ABCA1	ABCA2	ABCB6	ABCB8	ABCB9	ABCC1	ABCD1	ABCE1	ABCF1	ABCF3	ABCG1	ABHD13	ABHD15	ABHD2	ABHD3	ABHD4	ABHD5	ABI1	ABLIM1	ABR	ABT1	AC000068.1
EZH2_target_ChIP	2016-03-02	2016-03-04	2016-03-05	2016-03-06	2016-03-09	2016-03-10	2016-09-10	AAK1	AATF	ABCC3	ABCC4	ABCG4	ABHD14B	ABHD5	ABHD7	ABLIM2	ACAA2	ACCN1	ACCN2	ACHE	ACSL6	ACSS2	ACTN1	ACVR1	ACVR2A	ADAM23	ADAMTS1	ADAMTS15	ADAMTS19	ADAMTS2	ADAMTS3	ADAMTS5	ADAMTS8	ADCY1	ADCY4	ADCYAP1	ADM	ADRA1A	ADRB1	ADRBK2	AFAP1L1	AFF3	AGPAT9	AGXT2L1	AHNAK	AK1	AK3L1	ALDH1A2	ALK
denovobivGenes	OMA1	PRKCZ	TMCO4	DOCK7	DPYD	ARHGEF11	HHAT	SKI	KIF1B	TNFRSF1B	PINK1	LUZP1	AHDC1	RNF11	PPAP2B	LOC100131060	ATG4C	PDE4B	KCNA3	FAM46C	POLR3GL	ATP8B2	UCK2	FAM78B	C1orf9	FAM5B	LAMC1	RGL1	NR5A2	TMEM63A	GALNT2	B3GALNT2	OPN3	AGRN	C1orf159	SSU72	PANK4	LOC388588	RPL22	KLHL21	CLSTN1	FBXO2	FBXO44	EFHD2	RCC2	NBL1	ID3	LDLRAP1	ZNF593
NB_GCB_Progression_All_Genes_RPKM_enhancer_gain_plus3_plus4	ACSL5	ADORA3	AEN	AGFG2	AK5	ALPL	ANAPC4	ANKRD1	ANKRD13A	ANKRD33B	ANP32B	ANUBL1	ARL8B	ARMC9	ARRDC4	ASB13	ASXL1	ATL2	ATP5L	ATXN1	ATXN10	B3GALTL	B3GNTL1	B4GALT5	BAIAP2L1	BATF	BIK	BRWD1	BTBD12	BUB3	C10orf18	C10orf99	C14orf181	C17orf85	C18orf45	C1orf162	C20orf196	C3orf20	C4orf52	C7orf10	C8orf46	CAB39	CADM1	CADPS	CAMK4	CAMKK2	CAMTA1	CARM1	CCDC48
NB_GCB_Progression_All_Genes_RPKM_enhancer_loss_minus3_minus4	ABAT	ABCB1	ACBD3	ACTRT2	ADAM10	ADAMTS13	ADD1	ADK	AFF1	AGBL4	AGPAT5	AGRP	AGTPBP1	ALS2CR11	AMN1	AMPD3	AMPH	ANKRD55	ANKRD6	ANO3	ANP32A	ANXA3	AP1B1	AP1M1	AP3B1	ARGLU1	ARHGAP15	ARHGAP22	ARHGAP26	ARHGAP5	ARHGEF18	ARHGEF3	ARHGEF6	ARID4B	ASAM	ASGR2	ASPH	ATF3	ATF7IP2	ATG4C	ATP10D	ATP6V0E1	ATP6V1G3	B4GALT1	BANK1	BCL2	BCYRN1	BEND5	BLNK
NB_GCB_Progression_All_Genes_RPKM_minus2	AACS	AAK1	ABAT	ABCB1	ABCC5	ABCD4	ABHD10	ABI1	ACADM	ACBD3	ACOT9	ACSM1	ACTBL2	ACTL7B	ACTN4	ACTRT2	ACVR1	ACVR1B	ACYP2	ADAMTS13	ADAP2	ADCY7	ADCY9	ADK	ADORA2A	ADPGK	AES	AGPAT5	AGRP	AGTPBP1	AHCYL2	AHNAK	AHRR	AIFM3	AK1	AKAP6	AKAP8	AKIRIN2	AKT3	ALDH3B1	ALG8	ALPK1	ALPK2	ALS2CR11	ALS2CR4	AMZ1	ANGPT1	ANGPT2	ANKMY1
NB_GCB_Progression_All_Genes_RPKM_minus5	ADAM10	ADD1	AGBL4	AKNA	AMN1	AMPD3	ANKRD11	ANKRD55	AP1M1	AP3B1	ARGLU1	ARHGAP22	ARHGEF18	ARHGEF3	ARID4B	ARMC2	ASGR2	ATG4C	ATP10D	ATP6V0C	ATP6V1G3	B4GALT1	BCL11A	BEND5	BHLHE40	BICD2	BLNK	BOD1	BTG1	C11orf53	C12orf35	C12orf51	C14orf166B	C14orf182	C14orf183	C15orf57	C18orf20	C1orf201	C1QTNF7	C20orf72	C2orf85	C4orf34	CARD11	CARS2	CCND2	CCR6	CCS	CD47	CD6
NB_GCB_Progression_All_Genes_RPKM_minus10	ADARB1	ADD3	AFF1	AIM1	AMPH	ANXA3	ARHGAP15	ARID1B	BACH2	BANK1	BCL2	BLK	BTLA	C7orf58	CAMK2D	CDC73	CLLU1OS	CREB3L2	CREBBP	CSGALNACT1	DPH5	DUSP22	ELOVL5	ENTHD1	ETS1	EZR	FBRSL1	FBXO15	FOXO1	FOXP1	GAS7	GPR174	GRB2	HMBOX1	IFNGR1	IKZF3	JARID2	KHDRBS2	LCLAT1	MACROD2	MAP3K1	MAPKAP1	2016-03-03	MEF2C	MGAT5	MOBKL2B	MRVI1	MSI2	MSN
NB_GCB_Progression_All_Genes_RPKM_minus2.to.plus2	AADAC	AADAT	AARS	AASDH	AASS	ABCA1	ABCA12	ABCA2	ABCA4	ABCA6	ABCA8	ABCA9	ABCB11	ABCB4	ABCB9	ABCC2	ABCD2	ABCD3	ABHD12	ABHD12B	ABHD15	ABHD2	ABHD6	ABL1	ABLIM2	ABLIM3	ABO	ABP1	ABR	ABRA	ABT1	ACACA	ACACB	ACAP1	ACAP2	ACAP3	ACBD5	ACBD6	ACCN1	ACER2	ACER3	ACHE	ACMSD	ACO1	ACO2	ACOT11	ACOT7	ACOT8	ACOX3
NB_GCB_Progression_All_Genes_RPKM_plus10	ACSL5	ADORA3	AEN	AGFG2	AK5	ALPL	ANAPC4	ANKRD1	ANKRD13A	ANKRD33B	ANP32B	ANUBL1	ARL8B	ARMC9	ARRDC4	ASB13	ASXL1	ATL2	ATP5L	ATXN1	ATXN10	B3GALTL	B3GNTL1	B4GALT5	BAIAP2L1	BATF	BIK	BRWD1	BTBD12	BUB3	C10orf18	C10orf99	C14orf181	C17orf85	C18orf45	C1orf162	C20orf196	C3orf20	C4orf52	C7orf10	C8orf46	CAB39	CADM1	CADPS	CAMK4	CAMKK2	CAMTA1	CARM1	CCDC48
NB_GCB_Progression_All_Genes_RPKM_plus5	ADA	AEN	AFF2	AFF3	AGFG1	AGFG2	AGR3	AKAP11	ALCAM	ALPL	AMICA1	ANKRD13A	ANKRD16	ANKS1B	ANUBL1	AP1S3	APBB1IP	APBB2	ARID5B	ARL8B	ARMC9	ARSB	ASB13	ASB2	ASTN2	ATXN3L	AUH	AUTS2	AZIN1	B3GNTL1	BASP1	BATF	BCAS4	BCAT1	BCL2A1	BCL7A	BCOR	BET1	BFSP2	BRWD1	BTBD12	BTG2	C12orf77	C16orf75	C1orf162	C20orf196	C21orf7	C4orf22	C4orf52
NB_GCB_Progression_All_Genes_RPKM_plus2	A4GALT	ABCA10	ABCC1	ABCC12	ABCC4	ABCD1	ABCG1	ABHD3	ABHD5	ABI3	ABL2	ABLIM1	ABTB2	ACAD10	ACAD11	ACOXL	ACSL1	ACSL3	ACSL4	ACSL5	ACVR2A	ADAM17	ADAM28	ADAM29	ADAMDEC1	ADAMTS19	ADAMTSL3	ADARB2	ADCK2	ADCY3	ADORA3	ADRA2C	AEBP1	AEBP2	AFAP1L1	AFMID	AGAP1	AGK	AICDA	AIP	AJAP1	AK5	AKAP1	ALDH1L2	ALDH2	ALDH5A1	ALDH8A1	ALK	ALOX12P2
GCB_BCL6SMRT_Distal_Enhancer	ABR	ACP5	ADAM19	ADAM28	ADRB2	AKAP11	AKIRIN2	ALCAM	ALOX5AP	AMN	AMZ2P1	ANAPC4	ANKRD46	ANXA3	ANXA4	AP1M1	AP1S2	APCDD1	ARFGEF2	ARHGAP25	ARID5B	ARL11	ARL4C	ARL5A	ARRDC2	ARRDC4	ARSB	ATF7IP	ATP10A	ATP5O	ATP6V1G1	ATPIF1	B3GALTL	B4GALT5	BACH2	BASP1	BATF3	BCAR3	BCL11A	BCL2A1	BCL2L11	BCL6	BCOR	BEND4	BMP2K	BMP4	BOD1P	BTN3A2	BUB3
GCB_bivalentProm_genes	NBPF1	OMA1	PRKCZ	TMCO4	ZFYVE9	DOCK7	LOC100132618	DPYD	SLC22A15	PDE4DIP	ARHGEF11	NOS1AP	KLHL20	HHAT	C1orf96	GNG4	SKI	WRAP73	ERRFI1	KIF1B	TNFRSF1B	IFFO2	PINK1	LUZP1	C1orf130	MAN1C1	AHDC1	PTPRU	BAI2	HIVEP3	RNF220	ZSWIM5	RNF11	SCP2	PPAP2B	LOC100131060	NFIA	ATG4C	AK4	LEPROT	LEPR	PDE4B	PTGER3	SAMD13	TTLL7	DDAH1	TGFBR3	FNBP1L	SORT1
GC_termDiff_Genes	ABHD14A	ACOXL	ACTBL2	ACTC1	ADI1	ADM	ADM2	AEBP1	ALDH1L2	ALG5	ALKBH7	AMY1A	ANAPC11	ANKRD20A4	ANKRD33	APOA1BP	APOL6	AQP3	AQP9	ARF4	ARFGAP3	ARID3A	ARL1	ASNA1	ATP10D	ATP5J2	ATP5L2	ATP6V0C	ATP8B2	B2M	B3GALNT1	B9D1	BCKDHA	BCL2L1	BCL7C	BDKRB2	BEX5	BHLHA15	BHLHE41	BIRC5	BMP6	BRP44L	BTN3A2	C11orf10	C12orf23	C12orf57	C15orf24	C15orf39	C15orf48
Ly1_BCL6RD2mut_upreg	AACSP1	ABCA12	ABCB4	ABCD2	ABCD4	ABHD15	ABHD8	ACAD11	ACAP1	ACBD7	ACOXL	ACRV1	ACSF2	ACSM3	ACSS1	ACTA1	ACTN1	ACVR1	ADAM1	ADAMTS6	ADAMTSL4	ADARB1	ADARB2-AS1	ADD2	ADHFE1	ADM2	ADORA3	AEBP1	AES	AFAP1	AFAP1L2	AFF1	AGBL5	AGER	AGPAT4	AHDC1	AHNAK	AIDA	AK1	AKAP12	AKD1	AKIRIN2	AKT3	ALDH4A1	AMH	AMN	AMT	AMZ2P1	ANKHD1-EIF4EBP3
Ly1_siBCL6_48h_upreg	ZNF559	SLC25A30	LFNG	SLC25A34	LOC338799	HDAC9	ZWINT	TMEM79	PTGER4	CLOCK	SKA3	PEMT	LRRC43	DOCK10	DOCK11	ARHGAP31	TMCC1	ARHGAP33	CD248	T	ZNF569	UNC79	CEACAM21	IFITM2	TMEM8B	ARHGAP5	ARHGAP9	AFAP1L2	TGFBR1	TGFBR2	TGFBR3	MAN1C1	DKFZP586I1420	MSH5-SAPCD1	ARHGAP42	CSRP2	KLHDC8B	GNG2	GNG4	ZNF575	LOC100132247	HIRIP3	TMEM99	LRRC61	LYSMD3	SHISA3	SNX9	UBALD2	DDX12P
GCB.DLBCL_1085_intersectSignature	2016-03-05	2016-03-07	2016-03-08	ABCB6,ATG9A	ABCD4	ABHD3	ABHD4	ABI1	ABLIM1	ACAP2	ACOXL,BCL2L11	ACTR1A	ADAM17	ADAM9	ADIPOR1	ADIPOR2	ADM2,MIOX	ADORA2A-AS1	AFF4	AFTPH	AGO2	AGO3	AHDC1	AHSA1	AK9	AKAP10	AKIRIN1	AKT1S1,PNKP	ALG11,UTP14C	ALKBH1	AMFR	ANKRD11	ANKRD12	ANKRD37	APLP1,NFKBID	APPL2	ARF1	ARF4	ARHGAP5	ARHGEF12	ARID5B	ARL8A	ARL8B	ARRDC2	ARRDC3	ASNS	ASXL2	ATE1-AS1	ATF2
ly1.promoter.BCL6.all.3140	2016-03-01	2016-03-05	2016-03-06	2016-09-07	2016-09-09	2016-09-15	A4GALT	AAGAB	AAK1	AASDHPPT	ABCA1	ABCB4	ABCB9	ABCG1	ABHD10	ABHD12	ABHD13	ABHD15	ABHD3	ABHD4	ABHD5	ABLIM1	ABR	ACACA	ACAT2	ACBD4	ACIN1	ACN9	ACOT7	ACP2	ACPP	ACSF2	ACSF3	ACSL3	ACSL4	ACSS1	ACTR1A	ACTR2	ACTR3	ACTR3C	ACY3	ACYP1	ADAM10	ADAM22	ADAMTS13	ADAMTS6	ADAR	ADAT2	ADCK4
ly1.promoter.BCL6.SMRT.BCOR.341	ABCB4	ABR	ACSF3	ACY3	ADNP	AFF1	AIMP1	AKAP2	ALLC	AP4E1	APBB1IP	APOL6	ARHGAP15	ARHGAP31	ARHGEF7	ARID3A	ARL1	ARMC5	ARMC8	ARPC5L	ARRB2	ARRDC3	ATP2A3	ATP5G1	ATP6V0A1	B2M	B3GNT2	BANK1	BCAS4	BCL6	BIRC3	BRI3BP	BRPF1	C12orf35	C12orf4	C12orf57	C12orf77	C15orf62	C16orf7	C17orf62	C17orf91	C18orf1	C3orf26	C3orf37	C9orf46	CAPG	CASP8	CCDC88C	CCM2
ly1.promoter.BCL6-SMRT.all.451	2016-03-01	ABCB4	ABHD3	ABR	ACSF3	ACY3	ADNP	AFF1	AIMP1	AKAP2	ALG5	ALLC	AP4E1	APBB1IP	APOL6	ARHGAP15	ARHGAP25	ARHGAP31	ARHGDIB	ARHGEF2	ARHGEF7	ARID3A	ARL1	ARL6IP5	ARMC5	ARMC8	ARPC2	ARPC5L	ARRB2	ARRDC3	ATP2A3	ATP5G1	ATP6V0A1	ATP6V1C1	B2M	B3GNT2	B3GNT7	BANK1	BCAS4	BCL6	BIRC3	BRI3BP	BRPF1	BST2	BZW2	C12orf35	C12orf4	C12orf57	C12orf77
ly1.promoter.BCL6-BCOR.all.2142	2016-03-05	2016-03-06	2016-09-07	2016-09-09	2016-09-15	A4GALT	AAGAB	AAK1	ABCA1	ABCB4	ABHD10	ABHD12	ABHD13	ABHD15	ABHD5	ABLIM1	ABR	ACAT2	ACBD4	ACIN1	ACN9	ACOT7	ACP2	ACSF2	ACSF3	ACSL3	ACSS1	ACTR1A	ACTR2	ACTR3C	ACY3	ADAM10	ADAM22	ADAMTS6	ADAR	ADAT2	ADCK5	ADIPOR2	ADNP	ADORA2A	ADPRHL1	ADSSL1	AEBP1	AFF1	AFF3	AFG3L2	AGBL3	AGPAT5	AHI1
ly1.promoter.BCL6-BCOR.only.1783	2016-03-05	2016-03-06	2016-09-07	2016-09-09	2016-09-15	A4GALT	AAGAB	AAK1	ABCA1	ABHD10	ABHD12	ABHD13	ABHD15	ABHD5	ABLIM1	ACAT2	ACBD4	ACIN1	ACN9	ACOT7	ACP2	ACSF2	ACSL3	ACSS1	ACTR1A	ACTR2	ACTR3C	ADAM10	ADAM22	ADAMTS6	ADAR	ADAT2	ADCK5	ADIPOR2	ADORA2A	ADPRHL1	ADSSL1	AEBP1	AFF3	AFG3L2	AGBL3	AGPAT5	AHI1	AHSA2	AIM1	AK3L1	AKIRIN1	ALDH5A1	ALDH9A1
ly1.promoter.BCL6-SMRT.only.93	2016-03-01	ABHD3	ALG5	ARHGDIB	ARHGEF2	ARPC2	ATP6V1C1	B3GNT7	BST2	BZW2	C17orf99	C19orf61	CCL5	CD180	CD53	CD68	CDK14	CHMP7	CREM	CXCR5	CXCR7	CYTIP	DCLRE1A	DMD	DNAJC10	E2F1	EFCAB5	EVI2B	EXOSC8	FCRL2	FMO4	GCET2	GLT8D1	GPR183	GTSF1L	GUF1	GZF1	HEMGN	HSDL2	ICAM2	IFRD1	IGJ	IL10	IL4I1	ITGAL	JMJD1C	KCNJ16	KMO	LOC100133315
ly1.promoter.BCL6.alone.906	AASDHPPT	ABCB9	ABCG1	ABHD4	ACACA	ACPP	ACSL4	ACTR3	ACYP1	ADAMTS13	ADCK4	ADORA3	AFP	AHCYL2	AIFM1	AKAP12	AKT1S1	ALG12	ALG14	ALG8	ALKBH7	ALOX5AP	ALOXE3	ALS2CR8	ANGPTL6	ANK3	ANKMY2	ANKRD13A	ANKRD37	AP1G1	AP1S1	AP3S1	ARHGAP1	ARHGAP17	ARHGAP27	ARHGEF38	ARID4A	ARID4B	ARL5A	ARL5B	ARL6IP6	ARL8A	ARMC1	ARPC4	ARRDC5	ASAH1	ASB2	ASH1L	ASNA1
ly1.enhancer.DISTAL.BCL6-SMRT.DRE.553	ABR	ACTR3	ACYP2	ADAM28	ADM	ADO	ADRB1	ADRB2	AGPAT5	AGR3	AGRP	AHI1	AKAP11	ALG9	AMPD3	ANAPC1	ANKRD44	ANKRD46	ANXA1	ARAP2	ARHGAP20	ARHGAP22	ARHGAP25	ARHGEF18	ARHGEF38	ARID1B	ARID5B	ARL4C	ARL5A	ARPP21	ASAP1	ASB2	ASCC3	ATF7IP	ATF7IP2	ATP6V1G3	ATPIF1	ATXN3L	AZIN1	B3GNT2	BACH2	BASP1	BAT2L1	BCAR3	BCAS1	BCL11A	BCL2A1	BCL2L11	BCL6
ly1.enhancer.INTRONIC.BCL6-SMRT.DRE.807	2016-03-01	2016-09-06	2016-09-09	ABCB1	ABCC1	ABCC4	ABCC5	ABCG1	ABHD12B	ABI1	ABLIM1	ABR	ACBD3	ACOXL	ADA	ADAM17	ADAMTS19	ADARB1	ADARB2	ADD3	AFAP1	AFF1	AFF2	AFF3	AHRR	AIM1	AIM2	AKAP13	AKAP2	ALDH5A1	ALLC	ALOX5AP	AMPH	ANAPC16	ANK1	ANK3	ANKRD11	ANKRD28	ANKRD44	ANKS1A	ANKS1B	AP1B1	AP1S3	AP2B1	APBB1IP	ARFIP1	ARHGAP10	ARHGAP18	ARHGAP24
ly1.enhancer.INTRONIC.DISTAL.BCL6-SMRT.DRE.1275	2016-03-01	2016-09-06	2016-09-09	ABCB1	ABCC1	ABCC4	ABCC5	ABCG1	ABHD12B	ABI1	ABLIM1	ABR	ACBD3	ACOXL	ADA	ADAM17	ADAMTS19	ADARB1	ADARB2	ADD3	AFAP1	AFF1	AFF2	AFF3	AHRR	AIM1	AIM2	AKAP13	AKAP2	ALDH5A1	ALLC	ALOX5AP	AMPH	ANAPC16	ANK1	ANK3	ANKRD11	ANKRD28	ANKRD44	ANKS1A	ANKS1B	AP1B1	AP1S3	AP2B1	APBB1IP	ARFIP1	ARHGAP10	ARHGAP18	ARHGAP24
GCB.promoter.BCL6.all.5541	2016-03-01	2016-03-03	2016-03-05	2016-03-06	2016-03-07	2016-03-08	2016-09-02	2016-09-06	2016-09-07	2016-09-11	2016-09-15	A4GALT	AAAS	AAK1	AAMP	AARS	AARS2	AASDHPPT	ABCA1	ABCA5	ABCA7	ABCB10	ABCB7	ABCB9	ABCF2	ABCG1	ABHD10	ABHD12	ABHD13	ABHD15	ABHD3	ABHD5	ABI1	ABLIM1	ABLIM2	ABR	ABT1	ABTB2	ACAA1	ACAD9	ACADSB	ACAP2	ACBD4	ACBD5	ACBD6	ACIN1	ACN9	ACOT13	ACOT7
GCB.promoter.BCL6.SMRT.BCOR.1306	2016-03-01	2016-03-06	2016-03-08	A4GALT	ABCA1	ABCB9	ABHD13	ABLIM1	ABR	ACBD5	ACIN1	ACOT13	ACTA2	ACTR3	ACY3	ADAM8	ADAT2	ADNP	ADORA2A	AFF1	AHI1	AKAP10	AKAP13	ALDOA	ALG14	ALG2	ALG5	AMZ2P1	ANKRD11	ANKRD13D	ANKRD33B	AP1S2	AP1S3	AP4B1	AP4E1	APBB1IP	APH1A	APOB48R	ARF4	ARF6	ARFRP1	ARHGAP15	ARHGAP17	ARHGAP24	ARHGAP25	ARHGAP4	ARHGEF7	ARID1A	ARID2
GCB.promoter.BCL6-SMRT.all.1306	2016-03-01	2016-03-06	2016-03-08	A4GALT	ABCA1	ABCB9	ABHD13	ABLIM1	ABR	ACBD5	ACIN1	ACOT13	ACTA2	ACTR3	ACY3	ADAM8	ADAT2	ADNP	ADORA2A	AFF1	AHI1	AKAP10	AKAP13	ALDOA	ALG14	ALG2	ALG5	AMZ2P1	ANKRD11	ANKRD13D	ANKRD33B	AP1S2	AP1S3	AP4B1	AP4E1	APBB1IP	APH1A	APOB48R	ARF4	ARF6	ARFRP1	ARHGAP15	ARHGAP17	ARHGAP24	ARHGAP25	ARHGAP4	ARHGEF7	ARID1A	ARID2
GCB.promoter.BCL6-BCOR.all.5451	2016-03-01	2016-03-03	2016-03-05	2016-03-06	2016-03-07	2016-03-08	2016-09-02	2016-09-06	2016-09-07	2016-09-11	2016-09-15	A4GALT	AAAS	AAK1	AAMP	AARS	AARS2	AASDHPPT	ABCA1	ABCA5	ABCA7	ABCB10	ABCB7	ABCB9	ABCF2	ABCG1	ABHD10	ABHD12	ABHD13	ABHD15	ABHD3	ABHD5	ABI1	ABLIM1	ABLIM2	ABR	ABT1	ABTB2	ACAA1	ACAD9	ACADSB	ACAP2	ACBD4	ACBD5	ACBD6	ACIN1	ACN9	ACOT13	ACOT7
GCB.promoter.BCL6-BCOR.only.4145	2016-03-03	2016-03-05	2016-03-07	2016-09-02	2016-09-06	2016-09-07	2016-09-11	2016-09-15	AAAS	AAK1	AAMP	AARS	AARS2	AASDHPPT	ABCA5	ABCA7	ABCB10	ABCB7	ABCF2	ABCG1	ABHD10	ABHD12	ABHD15	ABHD3	ABHD5	ABI1	ABLIM2	ABT1	ABTB2	ACAA1	ACAD9	ACADSB	ACAP2	ACBD4	ACBD6	ACN9	ACOT7	ACOT8	ACP2	ACP6	ACSL3	ACSL4	ACSS1	ACTB	ACTG1	ACTR1A	ACTR2	ACTR3C	ACVR2A
GCB.promoter.BCL6.alone.106	AICDA	AIM2	AKT1S1	ARFGEF2	ARL6IP5	BCL9	BTBD19	C17orf101	C19orf54	C1orf174	C21orf58	CAMP	CASP8AP2	CCDC23	CCL27	CD68	CDKN3	CLECL1	CLYBL	COX8A	DDX25	DHDDS	EIF1AY	EIF4A1	ERMAP	EVI2B	FAM118B	FAM167B	FAM71D	FBXO8	FCRL3	FCRL4	FIZ1	GLTSCR2	GOLGA1	GPR82	GRIPAP1	GUK1	HAVCR2	HEXDC	IFI35	IL23A	ISG20	ISG20L2	KATNB1	KDM4B	KIAA0907	KIAA1712	LARP1
LPC_LSC_52_Alizadeh_JAMA_10	ABCC2	ANLN	BIRC3	C13orf3	CCDC48	CCL5	CCNA1	CD34	CD38	CLC	CPA3	CSTA	DDX53	DLGAP5	EBF3	EVI2A	FAIM3	FBXO21	GIMAP2	GIMAP6	GIMAP7	GUCY1A3	HECA	HLF	HOPX	HSPC159	ICAM1	IL1F8	KIAA0101	LOC100128550	LOC727893	LTB	MEF2C	MMRN1	MND1	MS4A3	OLFM4	PCDHGC3	PION	RBPMS	RNASE2	RNASE3	SETBP1	SH3BP5	SLC37A3	SLC38A1	STAR	TMEM200A	UBE2T
LSC_42_Dick_NatMed_11	ABCG1	ARFGEF1	ARL3	ARPP-19	ATP1B1	C16orf5	C17orf86	C2CD2	CLN5	CRKRS	CSDE1	EIF2S3	FAM119B	FLJ13197	FRMD4B	GPR56	IQGAP2	LOC552889	LRRC61	LRRC8B	MAP3K7	NAB1	NF1	NPAL2	PAQR6	PLCH1	PNPLA4	PPIG	PPP1R10	PTCD2	RABGAP1	RBPMS	SETDB1	SLC9A7	TGIF2	TRAF3IP2	UBR5	VGLL4	ZBTB39	ZFP30	ZNF304	ZNF500
HSC_120_Dick_NatMed_11	ABCB1	ABCB4	ALCAM	ANK3	ASXL1	ATP8B4	BAALC	BCL11A	BEX1	BTBD11	C13orf15	C20orf111	C20orf59	C2orf69	C5orf23	CACNB2	CALN1	CD109	CFH	COL5A1	CRHBP	CRIM1	CYLD	DACH1	DAPK1	DDX5	DLK1	DNAJB9	DRAM	DST	DUSP6	EIF5	ELK3	EPC1	ERG	EVI1	FAM169A	FAM3C	FBXL11	FGD5	FGFR1	FLT3	FNBP1	FOXO1	FRMD4B	GCNT2	GNL1	GPR126	GUCY1A3
IKAROS_target_ChIPseq_Young_Ebert_Cell_11	2016-03-04	2016-09-06	AAAS	ACOX1	ACSL6	ACTG1	ACTL6A	ACTN4	ACVR1	ADAM10	ADAM17	ADAM9	ADAMTS20	ADAP1	ADHFE1	ADSL	AFAP1	AGFG1	AGGF1	AGPAT2	AGRN	AIMP1	AIMP2	ALOX5	ANAPC5	ANKMY1	ANKRD49	ANPEP	AP2A2	AP4M1	APAF1	APEH	APPBP2	AQR	ARAP1	ARHGAP1	ARHGAP4	ARHGAP5	ARHGEF17	ARHGEF18	ARL1	ARL2	ARPP19	ARRB1	ARSJ	ASH1L	ATF2	ATF5	ATIC
MEIS1_target_ChIPseq_Ebert_Cell_11	AARSD1	ABCC1	ABI2	ADAMTSL3	ADORA3	ADSL	AEN	AFF1	AGPAT1	AHCY	AHR	AKAP7	AKAP9	AMPD3	AMZ2	AP2A2	APIP	APOBEC1	APOLD1	ARF4	ARHGAP15	ARHGAP17	ARHGAP22	ARHGAP24	ARHGAP25	ARHGAP26	ARHGEF3	ARHGEF6	ARID5B	ARPC3	ARPP21	ASAP1	ASTN2	ATAD2B	ATF7IP2	ATP11B	ATP5S	ATP6V0A1	ATXN10	ATXN7	AVL9	B4GALT1	BAALC	BACH2	BAZ2B	BBS1	BCAT1	BCL11A	BCL2A1
TAL1_target_ChIPseq_Ebert_Cell_11	AGFG1	ANKRD55	ANPEP	ATG9A	BCAR3	BNIP3L	C1D	C1orf38	CALM1	CBFA2T3	CCND3	CD226	CD69	CDC27	DAAM1	DCP1A	ELMO1	ETS1	ETV5	FLT1	GLG1	GNA12	GNG12	GPHN	HHEX	IL21R	IQGAP2	ITPR1	JARID2	KIF5C	LIMS1	LPP	LYL1	MAN2A2	MAP2K5	MAPK14	NFATC1	PARN	PIK3C2B	PLA2G6	PMF1	PRR5	PTPRD	PTTG1IP	RGS10	RPS6KA2	RUNX1	SCAMP2	SH2B3
PU.1_target_ChIPseq_Ebert_Cell_11	2016-03-01	2016-03-02	2016-03-05	A2M	AAAS	AAK1	AARSD1	ABCA1	ABCA2	ABCA7	ABCB1	ABCB7	ABCC1	ABCC4	ABCD2	ABCD3	ABCD4	ABCE1	ABCG1	ABHD2	ABI1	ABI2	ABLIM1	ABR	ABT1	ACAA1	ACACA	ACAP2	ACOX3	ACP1	ACP2	ACSL1	ACSL5	ACSL6	ACSM3	ACTA2	ACTB	ACTL6A	ACTN1	ACTN4	ACTR2	ACTR3	ACVR1B	ACYP2	ADA	ADAM10	ADAM19	ADAM28	ADAMTS3
PU.1_NB_prom	2016-03-01	2016-03-06	2016-03-08	2016-09-01	2016-09-15	AATF	ABCA7	ABCB4	ABCB7	ABCD2	ABCD4	ABCE1	ABCG1	ABHD11	ABHD8	ABI1	ABI3	ABL1	ABL2	ABT1	ACAA1	ACAA2	ACAP2	ACBD3	ACBD5	ACCS	ACN9	ACO2	ACOT8	ACOT9	ACP2	ACP5	ACSL4	ACSL5	ACSM3	ACTA2	ACTB	ACTN4	ACTR2	ACTR3	ACY3	ACYP2	ADAL	ADAM28	ADAP2	ADAR	ADARB2	ADAT3	ADCK2
PU.1_NB_enhancer	2016-03-01	2016-03-03	2016-03-06	2016-03-07	2016-03-08	2016-03-10	2016-09-01	2016-09-02	2016-09-06	2016-09-07	2016-09-09	2016-09-15	2016-12-01	A2BP1	A2M	A4GALT	AAA1	AACS	AAK1	ABAT	ABCA1	ABCA10	ABCA4	ABCA5	ABCA6	ABCA8	ABCA9	ABCB1	ABCB11	ABCB4	ABCC1	ABCC11	ABCC13	ABCC4	ABCC8	ABCD1	ABCD2	ABCD4	ABCE1	ABCG1	ABHD11	ABHD12	ABHD12B	ABHD15	ABHD2	ABI1	ABI3	ABL1	ABL2
PU.1_NB_all	2016-03-01	2016-03-03	2016-03-06	2016-03-07	2016-03-08	2016-03-10	2016-09-01	2016-09-02	2016-09-06	2016-09-07	2016-09-09	2016-09-15	2016-12-01	A2BP1	A2M	A4GALT	AAA1	AACS	AAK1	AATF	ABAT	ABCA1	ABCA10	ABCA4	ABCA5	ABCA6	ABCA7	ABCA8	ABCA9	ABCB1	ABCB11	ABCB4	ABCB7	ABCC1	ABCC11	ABCC13	ABCC4	ABCC8	ABCD1	ABCD2	ABCD4	ABCE1	ABCG1	ABHD11	ABHD12	ABHD12B	ABHD15	ABHD2	ABHD8
PU.1_CB_prom	2016-03-06	2016-09-01	A4GALT	AAGAB	AATF	ABCA7	ABCB7	ABCC1	ABCD2	ABCD4	ABCE1	ABCG1	ABHD11	ABI1	ABI3	ABL1	ABL2	ABR	ABT1	ACAA1	ACAA2	ACAD10	ACAP2	ACBD5	ACCS	ACN9	ACOT4	ACOT8	ACP2	ACPP	ACSL4	ACSL5	ACSM3	ACTA2	ACTN4	ACTR2	ACTR3	ACY3	ACYP2	ADAL	ADAM28	ADAMTS13	ADAP2	ADAT3	ADCK2	ADORA2A	ADORA3	ADPGK	ADPRH
PU.1_CB_enhancer	2016-03-01	2016-03-06	2016-03-08	2016-03-10	2016-09-01	2016-09-02	2016-09-06	2016-09-09	2016-09-15	2016-12-01	A4GALT	AAA1	AACS	AAGAB	AAK1	ABAT	ABCA1	ABCA10	ABCA4	ABCA6	ABCA8	ABCB1	ABCB11	ABCB4	ABCC1	ABCC11	ABCC13	ABCC4	ABCC8	ABCD1	ABCD2	ABCD4	ABCE1	ABCG1	ABHD11	ABHD12	ABHD12B	ABHD2	ABI1	ABI3	ABL1	ABL2	ABLIM1	ABP1	ABR	ABT1	ABTB2	ACAD11	ACAP2
PU.1_CB_all	2016-03-01	2016-03-06	2016-03-08	2016-03-10	2016-09-01	2016-09-02	2016-09-06	2016-09-09	2016-09-15	2016-12-01	A4GALT	AAA1	AACS	AAGAB	AAK1	AATF	ABAT	ABCA1	ABCA10	ABCA4	ABCA6	ABCA7	ABCA8	ABCB1	ABCB11	ABCB4	ABCB7	ABCC1	ABCC11	ABCC13	ABCC4	ABCC8	ABCD1	ABCD2	ABCD4	ABCE1	ABCG1	ABHD11	ABHD12	ABHD12B	ABHD15	ABHD2	ABI1	ABI3	ABL1	ABL2	ABLIM1	ABP1	ABR
IKZF1_CB_prom	AAAS	ABCB10	ABHD13	ABR	ACBD4	ACTL6A	ACTR3	ACVR1	ACY3	ADAM10	ADORA2A	ADSL	AGFG1	AHCYL2	AHSA1	AIDA	AIM1	AMZ2P1	ANGEL2	ANKRD10	ANKRD16	ANKRD17	ANKRD40	AP1S3	AP4B1	APBB2	APH1A	AQR	ARHGAP1	ARHGEF1	ARHGEF2	ARHGEF7	ARID1A	ARL2	ARPC5	ARPP19	ATAD1	ATAD2	ATAD2B	ATAD3A	ATF1	ATP5G1	ATP5G2	ATXN2L	AUP1	B3GALNT2	BAZ1A	BEND3	BEST4
IKZF1_CB_enhancer	2016-09-06	2016-09-09	A4GALT	ABCA1	ABR	ACSF3	ACY3	ADCY7	ADORA2A	AFAP1	AGPAT3	AKAP13	AKNA	AKR1A1	ANAPC16	ANGEL2	ANKRD33B	ANKRD9	AP1M1	AP1S3	APBB2	ARFGAP3	ARHGAP31	ARHGEF18	ARHGEF7	ARID1A	ARRDC2	ATP10A	ATXN2L	BAD	BAZ1A	BCAS1	BCOR	BCR	BEST4	BID	BIK	BLM	BRI3BP	BTG2	C10orf67	C14orf181	C16orf74	C1orf220	C1orf58	C1orf63	C1RL	C20orf132	C20orf166
IKZF1_CB_all	2016-09-06	2016-09-09	A4GALT	AAAS	ABCA1	ABCB10	ABHD13	ABR	ACBD4	ACRBP	ACSF3	ACTL6A	ACTR3	ACVR1	ACY3	ADAM10	ADCY7	ADORA2A	ADSL	AFAP1	AGFG1	AGPAT3	AHCYL2	AHSA1	AIDA	AIFM3	AIM1	AKAP13	AKNA	AKR1A1	AMZ2P1	ANAPC16	ANGEL2	ANKRD10	ANKRD16	ANKRD17	ANKRD33B	ANKRD40	ANKRD9	AP1M1	AP1S3	AP4B1	APBB2	APH1A	APOF	AQR	ARFGAP3	ARHGAP1	ARHGAP31
CTCF_NB_prom	2016-03-02	2016-03-05	2016-03-07	2016-03-09	2016-09-09	AAAS	AANAT	AARS2	ABCA1	ABCA17P	ABCA2	ABCA3	ABCB10	ABCC5	ABCD4	ABHD14A	ABHD14B	ABHD15	ABHD3	ABI1	ABLIM3	ABR	ABT1	ACAD11	ACAT1	ACBD4	ACBD7	ACCN2	ACCS	ACHE	ACOT13	ACPL2	ACSM1	ACTB	ACTL6A	ACTR1A	ACVR1C	ACY1	ADAM15	ADAMTS16	ADAMTS17	ADAMTS7	ADAMTSL2	ADAMTSL5	ADCK5	ADCY4	ADNP	ADPRHL2	ADRA1B
CTCF_NB_enhancer	2016-03-01	2016-03-08	2016-03-09	2016-03-10	2016-09-05	2016-09-06	2016-09-07	2016-09-09	2016-09-10	2016-09-15	A2BP1	A2LD1	A2ML1	AAA1	AACS	AADAC	AADACL4	AADAT	AAK1	AANAT	AARS2	AARSD1	AASDHPPT	AATF	AATK	ABAT	ABCA1	ABCA10	ABCA17P	ABCA4	ABCB1	ABCB11	ABCB4	ABCB5	ABCB6	ABCB9	ABCC1	ABCC10	ABCC11	ABCC12	ABCC13	ABCC2	ABCC4	ABCC5	ABCC6	ABCD3	ABCD4	ABCG1	ABHD10
CTCF_NB_all	2016-03-01	2016-03-02	2016-03-05	2016-03-07	2016-03-08	2016-03-09	2016-03-10	2016-09-05	2016-09-06	2016-09-07	2016-09-09	2016-09-10	2016-09-15	A2BP1	A2LD1	A2ML1	AAA1	AAAS	AACS	AADAC	AADACL4	AADAT	AAK1	AANAT	AARS	AARS2	AARSD1	AASDHPPT	AASS	AATF	AATK	ABAT	ABCA1	ABCA10	ABCA17P	ABCA2	ABCA3	ABCA4	ABCA5	ABCA7	ABCB1	ABCB10	ABCB11	ABCB4	ABCB5	ABCB6	ABCB9	ABCC1	ABCC10
CTCF_CB_prom	2016-03-05	2016-03-09	AAAS	AANAT	AARS2	ABCA17P	ABCA2	ABCA3	ABCB10	ABCC11	ABCC5	ABCD4	ABHD14A	ABHD14B	ABLIM3	ABR	ABT1	ACAD11	ACAT1	ACBD4	ACCN2	ACCS	ACHE	ACOT1	ACOT13	ACPL2	ACSS2	ACTB	ACTL6A	ACTR1A	ACVR1C	ACY1	ADAM12	ADAM15	ADAMTS16	ADAMTS17	ADAMTS7	ADAMTSL2	ADAMTSL5	ADCK5	ADCY4	ADNP	ADPRHL2	ADRA2B	ADRA2C	ADRBK1	ADRM1	ADSL	ADSSL1
CTCF_CB_enhancer	2016-03-01	2016-03-05	2016-03-08	2016-03-09	2016-03-10	2001-03-01	2016-09-05	2016-09-06	2016-09-07	2016-09-09	2016-09-10	2016-09-15	A2BP1	A2LD1	A2ML1	AAA1	AACS	AADAC	AADACL4	AADAT	AAK1	AANAT	AARS2	AARSD1	AASDHPPT	AATF	AATK	ABAT	ABCA1	ABCA10	ABCA17P	ABCA4	ABCB1	ABCB11	ABCB4	ABCB5	ABCB9	ABCC1	ABCC11	ABCC12	ABCC13	ABCC2	ABCC4	ABCC5	ABCC6	ABCD3	ABCD4	ABCG1	ABCG4
CTCF_CB_all	2016-03-01	2016-03-04	2016-03-05	2016-03-08	2016-03-09	2016-03-10	2001-03-01	2016-09-04	2016-09-05	2016-09-06	2016-09-07	2016-09-09	2016-09-10	2016-09-15	A2BP1	A2LD1	A2ML1	AAA1	AAAS	AACS	AADAC	AADACL4	AADAT	AAK1	AANAT	AARS	AARS2	AARSD1	AASDHPPT	AASS	AATF	AATK	ABAT	ABCA1	ABCA10	ABCA17P	ABCA2	ABCA3	ABCA4	ABCA7	ABCB1	ABCB10	ABCB11	ABCB4	ABCB5	ABCB9	ABCC1	ABCC11	ABCC12
CTCF_ly1_prom	2016-03-02	2016-03-03	2016-03-05	2016-03-07	2016-03-08	2016-03-09	2016-09-02	2016-09-04	2016-09-06	2016-09-07	2016-09-09	A2ML1	AAA1	AAAS	AANAT	AARS2	AARSD1	AASDHPPT	AATF	ABCA1	ABCA17P	ABCA2	ABCA3	ABCB10	ABCB5	ABCB8	ABCC1	ABCC11	ABCC4	ABCC5	ABCD1	ABCD2	ABCD4	ABHD13	ABHD14A	ABHD14B	ABHD15	ABHD3	ABHD4	ABHD5	ABHD6	ABI1	ABLIM3	ABR	ABT1	ACAD10	ACAD11	ACADVL	ACAP3
CTCF_ly1_enhancer	2016-03-01	2016-03-03	2016-03-05	2016-03-06	2016-03-07	2016-03-08	2016-03-09	2016-03-10	2001-03-01	2016-09-04	2016-09-05	2016-09-06	2016-09-07	2016-09-08	2016-09-09	2016-09-10	2001-09-01	2016-09-15	2016-12-01	A1CF	A2BP1	A2LD1	A2ML1	AAA1	AACS	AACSL	AADAC	AADACL4	AADAT	AAGAB	AAK1	AANAT	AARS2	AARSD1	AASDHPPT	AATF	AATK	ABAT	ABCA1	ABCA10	ABCA12	ABCA13	ABCA17P	ABCA2	ABCA3	ABCA4	ABCA5	ABCA8	ABCA9
CTCF_ly1_all	2016-03-01	2016-03-02	2016-03-03	2016-03-04	2016-03-05	2016-03-06	2016-03-07	2016-03-08	2016-03-09	2016-03-10	2001-03-01	2016-09-02	2016-09-04	2016-09-05	2016-09-06	2016-09-07	2016-09-08	2016-09-09	2016-09-10	2001-09-01	2016-09-15	2016-12-01	A1CF	A2BP1	A2LD1	A2ML1	A4GALT	AAA1	AAAS	AACS	AACSL	AADAC	AADACL4	AADAT	AAGAB	AAK1	AANAT	AARS	AARS2	AARSD1	AASDHPPT	AASS	AATF	AATK	ABAT	ABCA1	ABCA10	ABCA12	ABCA13
P300_ly1_prom	2016-09-06	AAGAB	ABHD13	ABLIM1	ACBD6	ACP2	ACP6	ACTB	ACTG1	ACTR3C	ACY3	ADAT2	ADIPOR2	ADORA2A	ADPGK	ADPRHL2	ADSL	AFF1	AFF3	AGPAT6	AK3	AKIRIN1	AKT1S1	AKT2	ALDH4A1	ALDOA	ALG3	AMPD2	ANAPC13	ANGEL1	ANKMY2	ANKRD10	ANKRD12	ANKRD13A	ANKRD17	ANKRD50	AP1S3	AP3S2	AP4M1	AP4S1	APBB1IP	APITD1	APTX	AQR	ARAF	ARHGAP4	ARHGAP5	ARHGEF1	ARHGEF7
P300_ly1_enhancer	2016-09-09	A4GALT	AACS	ABCC1	ABCG1	ABHD12B	ABLIM1	ABLIM2	ABP1	ABR	ACOX3	ACOXL	ACSF3	ACTR3C	ACY3	ADAM19	ADAM29	ADAMTSL4	ADARB1	ADARB2	ADC	ADCY7	ADORA2A	ADPRHL1	ADRBK1	AEBP1	AFF1	AGPAT2	AGPAT6	AHDC1	AHI1	AHRR	AIM2	AKAP13	AKAP2	AKAP4	AKNA	AKT2	ALDH3B2	ALDH5A1	ALG3	AMN	AMPD2	ANAPC13	ANK3	ANKRD10	ANKRD11	ANKRD16	ANKRD17
P300_ly1_all	2016-03-01	2016-03-03	2016-03-06	2016-03-07	2016-03-08	2016-03-10	2016-09-01	2016-09-02	2016-09-06	2016-09-07	2016-09-09	2016-09-15	2016-12-01	A2BP1	A2M	A4GALT	AAA1	AACS	AAK1	AATF	ABAT	ABCA1	ABCA10	ABCA4	ABCA5	ABCA6	ABCA7	ABCA8	ABCA9	ABCB1	ABCB11	ABCB4	ABCB7	ABCC1	ABCC11	ABCC13	ABCC4	ABCC8	ABCD1	ABCD2	ABCD4	ABCE1	ABCG1	ABHD11	ABHD12	ABHD12B	ABHD15	ABHD2	ABHD8
ARID1A_mut_up_141_Ash_FL	ACP1	ACP5	ANXA6	AP2B1	APH1A	APOBEC3F	ARHGAP9	ARL4C	BCAP29	BRE	C2orf12	C2orf28	C3orf28	C8orf59	C9orf46	CASP1	CASP4	CD1D	CD24	CD247	CD47	CD84	CHST11	CLIC1	CLN5	COX11	COX7A2L	CXCR7	CYB5A	DNAJC15	DNPEP	DOCK7	DTX3L	EEF1B2	EHD1	EIF2S3	EIF4E2	FAM108A1	FAM108B1	FAM117A	FAM128A	FXYD5	FYN	GGCX	GLTSCR2	GNG11	GPN1	GRK5	hCG_20857
ARID1A_mut_down_390_Ash_FL	AACS	ABI1	ADAM28	ADARB1	AGPAT6	AHR	AHSA2	AKAP2	ALCAM	ALDH2	ANAPC4	ANK1	ANKRD13A	AP1G1	ARHGAP24	ARHGEF12	ARID5B	ARL2BP	ARL6IP6	ARPC5L	ASB13	ASH1L	ATF4	ATF5	ATF7IP	ATP8A1	AUH	B4GALT5	BCL6	BCL7A	BICD1	BMP2K	C10orf18	C12orf51	C14orf101	C14orf106	C14orf139	C17orf56	C17orf91	C18orf8	C1orf104	C1orf63	C1orf71	C1orf79	C1orf96	C8orf70	CARS	CBWD1	CBX3
CREBBP_mut_up_334_Ash_FL	2016-03-01	AASDH	ACBD3	ACVR1	AFF3	AKAP11	AKAP13	ALKBH5	ANKMY2	APPL1	ARF6	ARL17	ASXL2	ATF1	ATF7IP	ATL3	ATRX	B4GALT1	BACH2	BBX	BCLAF1	BRWD1	BRWD3	C10orf118	C16orf52	C1orf108	C22orf32	C4orf30	C5orf21	C5orf41	C6orf166	C6orf199	C6orf35	C6orf72	C7orf10	CALCOCO2	CAMK2D	CAT	CCBL2	CCDC50	CCNI	CD24	CD69	CDC27	CDC40	CDKN1B	CHPT1	CHST11	CHURC1
CREBBP_mut_down_278_Ash_FL	ABCF1	ACTL6A	ADARB1	ADCK2	ADSL	ADSS	ALDH2	APEX1	ARHGEF2	ASNS	ATP1A1	ATP1B3	ATP5J2	ATPIF1	BASP1	BATF	BCAS4	BCL2	BOLA2	BPNT1	BTN2A2	C11orf24	C11orf75	C17orf89	C18orf55	C1orf142	C1orf19	C1orf31	C1orf41	C3orf1	C6orf125	C6orf129	C6orf153	C7orf47	C8orf38	C8orf40	CASC5	CD58	CD74	CD99	CDC16	CENPK	CENPN	CEP170	CHMP2A	CIRH1A	CLECL1	CLIC4	CLINT1
EP300_mut_up_104_Ash_FL	ADNP	AMZ2	ATF7IP	ATP2B1	ATRX	BANK1	BCL10	BRWD3	C5orf5	C6orf35	C7orf44	CDC2L6	CHCHD7	CHD9	CLK4	DAPP1	DAZAP2	DDHD1	DIP2B	DOPEY1	DUSP1	DYRK2	EBAG9	EPC1	ESCO1	FBXO30	FGFR1OP2	FRYL	FTH1	IKZF1	IQGAP1	JMJD1C	KATNA1	KIAA0232	KIAA1033	KLHL2	KRR1	MALAT1	MAP3K7	MAP3K7IP2	MBNL1	MED23	MEF2C	MORF4L2	MTF1	MTMR9	NBN	OSBPL11	OSBPL8
EP300_mut_down_271_Ash_FL	ABCA5	ADCK2	ADSL	AICDA	AK2	ALDOA	ALKBH7	APEX1	ARF5	ARMCX5	ARPC5	ASMTL	ATP5G1	ATP5G3	ATP5I	ATP5J2	ATP5O	AUTS2	BAG1	BCL6	BLMH	BTF3	BZW2	C11orf10	C11orf24	C11orf75	C1orf31	C1orf51	C20orf52	C21orf33	C3orf1	C4orf14	C5orf13	C6orf153	C6orf99	C7orf47	C7orf55	CAMLG	CAPNS1	CARHSP1	CCDC90A	CCNA2	CCT3	CCT8	CD247	CDC25B	CENPK	CEP55	CHCHD2
EZH2_mut_up_124_Ash_FL	ABCF1	ACO2	ADAM28	ARHGAP24	ARHGEF7	ASAH1	ASB2	ATP6V0A2	ATXN7	B4GALT5	BMP2K	BOLA2	BPNT1	BRD4	BRWD2	C17orf89	CBL	CCDC6	CCDC88B	CD22	CLPTM1L	CPSF1	CTBP1	CTNNBL1	CUGBP2	DDEF1	DENND3	DIAPH1	DKFZp547E087	EHD4	ELF4	FAM107B	FLJ21438	FNBP1	FOXK1	GATAD2A	GIT2	HCLS1	HLADQA1	HMGCR	IL12RB1	ILDR1	INPP5F	IQGAP1	ITPKB	KCNMB3	KIAA0746	KIAA1430	KIF3B
EZH2_mut_down_347_Ash_FL	2016-03-03	AACS	AASDHPPT	ABI2	ACP1	ACP6	ACTR2	ACVR1	ADI1	AKT3	ALS2CR13	ANKMY2	ANP32A	APIP	ARFGAP3	ARHGAP15	ARHGEF6	ARL3	ARL5A	ASNSD1	BACH2	BCR	BLVRA	BMP7	BMPR1A	BMPR2	BRP44	C1GALT1C1	C2orf25	C4orf14	C4orf32	C5orf13	C5orf21	C5orf26	C6orf35	C6orf99	C7orf10	C9orf21	C9orf95	CAB39L	CABC1	CAMK2D	CAMLG	CCBL2	CCDC117	CCDC50	CD24	CD37	CD79B
KMT2D_mut_up_20_Ash_FL	CLEC2D	COQ5	GDI2	HARS	HSPA9	IDH3B	LETMD1	MLL2	MRPL10	MRPL43	PDPR	POLR2J2	PRRC1	RPUSD4	UQCRC2	WDR41	ZDHHC4
KMT2D_mut_down_41_Ash_FL	BBX	C9orf5	CAMK2D	CDC42EP3	CHD4	DDX6	DHX36	DHX9	FAM49A	FAM53B	JMJD1C	KIAA1333	KRR1	LOC100132235	MALAT1	MSL2L1	NBN	OSBPL11	OSBPL8	PAPD5	PPP1R12A	PRKCZ	PTPRA	RILPL2	RSRC1	SFRS2IP	STRBP	SYNCRIP	TOX4	TSPYL1	WSB2	YY1	ZFP91	ZFR	ZNF268	ZNF638
KMT2C_mut_up_144_Ash_FL	2016-03-01	2016-09-06	ACSL3	ADRBK2	AMIGO2	AMMECR1L	APOBEC3C	APOBEC3F	ARHGAP25	ASAH1	ASXL2	ATP11C	ATRX	BMI1	C1orf103	C22orf30	C6orf130	CEPT1	CLASP1	CNDP2	CNPY3	CREB1	CRKL	CTSS	CYBB	DAXX	DCP2	DDX6	DNPEP	ENPP4	FAM108A1	FLJ20309	FLJ27365	FOXN2	GALNT3	GLS	HLAA	HLADPA1	HLADQA1	HLAE	HLAJ	HMGN4	HNRNPH2	HNRPDL	HRB	IDS	IL7	ING1	INPP5D
KMT2C_mut_down_214_Ash_FL	ACAT1	ACSS1	ACYP2	ADK	AIG1	AMD1	AMZ2	ANKH	ARID1B	ASL	ATF4	ATP6V0B	AUH	BAX	BBS1	BCKDHB	BRP44L	BUB3	BXDC1	C11orf73	C12orf49	C14orf106	C15orf29	C17orf45	C17orf48	C6orf173	C6orf70	C6orf99	C9orf85	CASP1	CCDC126	CCDC64	CCL17	CCNB1	CCNB1IP1	CCNB2	CCNC	CCNE2	CD164	CD19	CD59	CD81	CDC2	CDC25B	CDCA2	CDR2	CEP152	CGGBP1	CIRBP
CREBBP.mouse.ChIPseq.LOSS.25.prom	AACS	AATF	ABCC1	ABCF1	ABCF2	ABHD10	ABHD13	ABHD6	ABT1	ACADVL	ACAP2	ACIN1	ACSF2	ACSL4	ACTB	ACTR2	ACTR6	ADAM10	ADAM9	ADAMTS13	ADNP	ADNP2	ADPGK	ADRM1	AGPAT1	AGPAT5	AGPAT6	AGTPBP1	AHCYL1	AHDC1	AI837181	AIG1	AK010878	AKIRIN1	AKR7A5	ALG1	ALKBH3	AMD1	AMD2	AMDHD2	AMPD2	ANKRD13A	ANXA5	AP1B1	AP2S1	APBA3	APH1B	APPL1	ARAF
CREBBP.mouse.ChIPseq.LOSS.25.enhancer	AA960436	AACS	AAK1	ABCB1A	ABCC1	ABCF1	ABCF2	ABHD6	ACADVL	ACAP2	ACIN1	ACOT11	ACSF2	ACSF3	ACSL4	ACSS2	ACTR2	ACTR6	ADAM10	ADAM17	ADAM9	ADAMTS13	ADNP	ADNP2	ADPGK	ADRM1	ADSSL1	AF067061	AGAP2	AGPAT1	AGPAT6	AGPAT9	AGTPBP1	AHCYL1	AHCYL2	AHDC1	AIF1	AKAP12	AKAP2	AKIRIN1	ALG1	AMPD2	ANK3	ANKRD13A	ANKS1	ANO6	ANXA5	AP1B1	AP1S3
Promoter_loss.ATAC.reads_CREBBP.KD	C15orf62	CHRNE	CIITA	FAM129C	LINC01225	LINC01342	LOC100129046	LOC400958	MAP1LC3B2	MRPL38	MS4A1	RGS1	TRAF3IP3	ZNF101
Intron_loss.ATAC.reads_CREBBP.KD	ACOXL	ACSF3	ADAM23	ADAM29	ADAMTS6	ADORA1	AFF2	ALPK1	ANKRD55	ANOS1	AP1B1	APCDD1	AQP3	ARHGAP24	ARHGEF25	ARHGEF3-AS1	ATP2A3	ATP5L	AZIN2	BAG3	BCL2	BCRP3	BFSP2	BICD2	BLNK	BRINP3	C5orf56	C7orf60	C7orf72	CABLES1	CALN1	CARD11	CASC15	CBR4	CCDC148-AS1	CCDC6	CCDC69	CCDC9	CCM2	CD38	CD81	CDC25B	CDH1	CDK6	CHCHD3	CHRNB2	CHST13	CHST15	CLPTM1L
Distal_loss.ATAC.reads_CREBBP.KD	A4GALT	AATK	ACAA2	ACSF3	ACTR3BP2	ACTR3BP5	ACVR1	ACVR2A	ADAM6	ADAR	ADARB2-AS1	ADGRG1	ADGRL3	AFF2	AGPAT2	AGPAT4-IT1	AIRN	AKAP12	AKAP2	AKIRIN2	ALG10	ALG6	ALPP	AMBP	ANAPC1	ANAPC1P1	ANKRD26P1	ANKRD30BL	ANKRD46	ANO3	ANXA4	AP1G1	AQP9	ARHGEF18	ARHGEF3-AS1	ARID1B	ARRDC2	ARRDC3-AS1	ARTN	ATG101	ATP1A1	ATP8B1	BAK1	BCL2L14	BDH1	BDKRB1	BDKRB2	BEGAIN	BMS1P20
Enhancer_loss.ATAC.reads_CREBBP.KD	ACOXL	ACSF3	ADAM23	ADAM29	ADAMTS6	ADORA1	AFF2	ALPK1	ANKRD55	ANOS1	AP1B1	APCDD1	AQP3	ARHGAP24	ARHGEF25	ARHGEF3-AS1	ATP2A3	ATP5L	AZIN2	BAG3	BCL2	BCRP3	BFSP2	BICD2	BLNK	BRINP3	C5orf56	C7orf60	C7orf72	CABLES1	CALN1	CARD11	CASC15	CBR4	CCDC148-AS1	CCDC6	CCDC69	CCDC9	CCM2	CD38	CD81	CDC25B	CDH1	CDK6	CHCHD3	CHRNB2	CHST13	CHST15	CLPTM1L
Promoter_gain.ATAC.reads_CREBBP.KD	ABCC4	ADO	AGA	ALCAM	ATP10D	ATP5C1	BCRP2	C4orf27	C9orf91	CBLB	CBWD2	CCDC14	CECR5-AS1	CFAP97	CLDND1	CLK1	CRB1	DDX58	DDX60L	DHRS12	ELL2	EOGT	ETAA1	FAM200B	FCHSD1	FNIP2	GCA	GGH	GYPC	HSD17B4	IFT74	LRRC16B	LRRCC1	MOB1B	MRPL19	MRPS9	NFKBIE	NSUN2	OCIAD2	PLSCR1	POM121	PROS1	RANBP2	RNASEL	RPS23	SEC61G	SLITRK6	SPIDR	SSRP1
Intron_gain.ATAC.reads_CREBBP.KD	ABAT	ABLIM3	ADGRB3	AGA	AKAP6	ARHGAP21	ARHGEF9	ASB2	ATP10D	ATP2B3	ATXN1	BCAT1	BCHE	BFAR	BORCS5	C1orf21	C4orf33	CCDC91	CCR2	CDK13	COL15A1	COLEC12	DGKI	DMTN	DNAH7	DTNA	DUSP19	ERP44	FAM212B-AS1	FGF7	FRMD3	GBE1	GLI2	GOLIM4	GRID2	GSTO1	GTDC1	IL6R	ITGA2	KCNB2	KHDRBS2	KIAA0825	KLHL29	LAMC2	LINC00348	LPIN1	LRP1B	LURAP1L	LYPLAL1-AS1
Distal_gain.ATAC.reads_CREBBP.KD	ABI3BP	ADGRL3	AKR1C2	ALLC	AMER3	ANP32C	AQP7P1	ARHGAP5-AS1	ARID5A	BATF3	BCHE	BLVRA	C1GALT1	C3orf58	C5orf30	C6orf118	C8orf37-AS1	CARHSP1	CBLB	CCDC24	CD109	CDH6	CENPC	CHL1	CNTNAP2	COL11A1	COL8A1	CPEB2-AS1	CSNK1A1P1	CTLA4	CWC15	DACH1	DCAF4L2	DCC	DLGAP1-AS1	DMD	DNAJC12	DUSP19	DUSP5	EFNA5	EMX2OS	ERGIC2	ETV1	FABP2	FAM101A	FAM188A	FAM46A	FAM71C	FAM83D
Enhancer_gain.ATAC.reads_CREBBP.KD	ABAT	ABLIM3	ADGRB3	AGA	AKAP6	ARHGAP21	ARHGEF9	ASB2	ATP10D	ATP2B3	ATXN1	BCAT1	BCHE	BFAR	BORCS5	C1orf21	C4orf33	CCDC91	CCR2	CDK13	COL15A1	COLEC12	DGKI	DMTN	DNAH7	DTNA	DUSP19	ERP44	FAM212B-AS1	FGF7	FRMD3	GBE1	GLI2	GOLIM4	GRID2	GSTO1	GTDC1	IL6R	ITGA2	KCNB2	KHDRBS2	KIAA0825	KLHL29	LAMC2	LINC00348	LPIN1	LRP1B	LURAP1L	LYPLAL1-AS1
mouse.shCrebbp.r2.up_p.500	SNORD35B	MIR466D	EAF2	E130307A14RIK	TRIM17	4930455C13RIK	MIR3470A	FAM162A	FCHO2	SBSN	CCDC101	OBSCN	BICD1	MRPL14	CREB3L4	FKBP1B	4930455C13RIK	LRRC42	DYNLT1F	GM19897	MACROD1	4933439C10RIK	4930404I05RIK	2210404O09RIK	2310022A10RIK	FAM160B2	RP1L1	WRB	ZC4H2	MIR3471-1	FAM219A	MIR5626	HIST2H2AA2	KLHL35	GM4984	PPA2	4930500J02RIK	PLLP	UBA6	ANKRD46	SLC39A3	DTX3L	TFDP2	HYPK	MBNL3	NOA1	ALDH6A1	NME4	PRKCQ
mouse.shCrebbp.r2.down_p.500	NID2	ZFHX3	OARD1	CEP63	FTL1	ATP13A3	KANSL2	ETF1	INSIG1	EGLN2	MIR3101	RAB4B	IVNS1ABP	INTS6	NFKBIL1	ASUN	THUMPD3	ETNK1	TTC17	SSB	MYO10	GALNT2	GM17066	RBM26	GM7102	TSC22D2	TEF	PHF5A	BAIAP3	ING1	BC024139	EPPK1	KANK2	RPS6KA2	SLC35E1	TMEM189	CALR	DAND5	RAD23A	MRFAP1	GRAP	KCNH6	PCF11	VMAC	PAIP2B	WDR95	MIR7036	SRRT	CCDC12
mouse_shCrebbp.r2.up_328	MRPL30	GM20257	B3GNT7	GIN1	CD247	LACTB2	GM5523	EYA1	MIR5103	SNORD89	ICA1L	PDE6D	TSEN15	RGL1	MGST3	PVRL4	SLAMF6	SMYD2	TATDN3	NENF	CD46	RAET1A	RAET1B	RAET1C	RAET1D	RAET1E	HDDC2	CDH23	GM5134	MIR6409	SLC19A1	BC1	APPL2	MIR8104	PPM1H	ARHGAP9	H60B	CEP57L1	2510003E04RIK	MMP11	MIR678	PRMT2	SLC39A3	ZFP938	1190007I07RIK	CRADD	MRPL42	SLC16A7	BLOC1S1
mouse_shCrebbp.r2.down_545	RRS1	IL1R2	USP37	TMEM198	PIGR	IL10	CACNA1S	2810025M15RIK	PTPN14	MREG	A530032D15RIK	C130026I21RIK	GPR55	ARMC9	MIR3535	NCL	SNORA75	9430060I03RIK	2900060B14RIK	IL10	IL10	ELK4	DNM3	XCL1	RGS4	FCGR2B	FCER1G	CR2	CITED2	4930455C13RIK	GP49A	LILRB4	MCM9	SOWAHC	ADAMTS14	PRF1	CCAR1	EGR2	RHOBTB1	DERL3	BC1	MATK	PHLDA1	GNS	STAT2	STX11	MARCKS	PRDM1	4632428N05RIK
mouse.shCrebbp.r2.0_p.1000_up	ACSS1	ADAM23	ADI1	MIR6937	ADIPOR1	ADRA1B	AI848285	AIG1	AIRN	AKAP1	AKAP11	AKR1A1	ALAS1	ALDH6A1	AMBRA1	AMH	AMIGO1	AMY1	ANKRD28	ANKRD46	AP2M1	APOF	APOL7E	ARHGAP31	ARHGAP35	ARHGEF11	ARL6	ASB6	ASIC4	ATP5O	ATP6V0B	ATRN	AW112010	AXIN1	B3GNT4	B3GNT7	BC002163	BC021614	BC1	BCKDHA	BCORL1	BFSP2	BICD1	BMP10	BMYC	BRD7	BTBD7	CAAP1	CACNA1D
mouse.shCrebbp.r2.0_p.1000_down	ABTB2	ACACB	ACTN1	ACTR8	SELK	AGPAT3	AGPAT5	AHCYL2	AIM1L	AKR1B3	ALDH3B1	AMD1	AMIGO3	GMPPB	APOLD1	ARFIP2	ART3	ASUN	ATF6	ATP13A3	B3GNT2	B9D2	BAG3	BAIAP2	BAIAP3	EPPK1	BCCIP	BCL10	BCL2L15	BHLHE40	BHLHE41	BID	C2	CALR	DAND5	RAD23A	CARD6	CASS4	CAT	CBX6	NPCD	NPTXR	CCDC117	CCDC12	CCDC85B	CCDC94	CCRL2	CCT7	CD72
c1.Crebbp.up_198	ABCC8	ACCS	ALKBH3	ANK1	ANKRD30BL	APOD	ARHGAP10	ARMCX2	ATF5	BAIAP2L1	BEX2	BEX4	BMP3	BMP7	BMP8A	BNIP3	BOLA1	C10ORF10	C19ORF18	C22ORF36	C6ORF99	C9ORF129	CBLN3	CBR1	CCDC22	CCDC85A	CCL17	CCL28	CEBPB	CEBPD	CES4A	CHST15	CLEC4G	CPNE2	CRMP1	CRYBA4	CSDA	CYB5A	CYTH3	DAB2IP	DHX32	DNER	DUSP8	ECHDC2	EID3	EMILIN2	EML6	ENPP3	EVC
c1.Crebbp.down_397	ABCA2	ABCB1	ABCG1	ABI3	ACP5	ACPP	ACY3	ADAM8	ADD3	AFF1	AHNAK	ALDH2	AMICA1	AMOT	ANGPTL6	ANXA4	APP	ARHGAP15	ARHGAP18	ARHGAP44	ARID3A	ARL4A	ARRDC4	ARSD	ATP2B4	ATXN1	BACE2	BAG3	BATF2	BCAR3	BCL9L	BFSP2	BHLHE40	BHLHE41	BIN2	BLVRB	BRI3BP	C10ORF128	C10ORF54	C11ORF85	C12ORF42	C1ORF115	C1ORF228	C1ORF38	C20ORF103	C21ORF7	C3ORF25	C4ORF7	C6ORF204
c1.Ep300.up_381	ABHD1	ACCS	ACP2	ACTG1	ADAL	AIG1	ALDH4A1	AMT	ANKH	ANKRD23	ANKRD6	AP1M1	AP4S1	APBB2	ARF5	ARL2BP	ARPC4	ARPC5	ARSA	ATF5	ATP6AP1L	ATP6V0B	ATPAF1	AXIN1	BACE1-AS	BAX	BBC3	BCAT2	BCL2L1	BCS1L	BMP8A	BOLA1	C10ORF57	C11ORF41	C11ORF49	C11ORF68	C11ORF84	C15ORF17	C15ORF37	C16ORF42	C16ORF91	C17ORF100	C17ORF108	C17ORF90	C17ORF99	C19ORF39	C19ORF52	C1ORF123	C1ORF216
c1.Ep300.down_692	ABI3	ABLIM1	ACBD7	ACSL4	ACY3	ADAM15	ADAM9	ADM	ADRA2B	AEBP1	AFF1	AHCTF1	AHNAK2	AK1	AMD1	AMN	ANKRD58	ANP32D	APOBEC3H	AQR	ARFIP1	ARG2	ARHGAP26	ARHGAP42	ARHGAP9	ARHGEF25	ARHGEF6	ARID3A	ARID4B	ARL15	ARL5B	ARRDC4	ASTL	ATAD2	ATAD3C	ATG4C	ATG9B	ATL1	ATL2	ATP1B1	ATP6V0A1	ATRX	AVPI1	AZIN1	BACE2	BACH1	BAG3	BAG4	BATF2
c2.Crebbp.down_295	HIST3H2BB	PREX1	PLAC8	SLAMF7	S100A4	LMO2	CCDC144C	KLF4	PLD4	GBP2	LY6E	JAM3	RNASE6	TNFRSF13B	LGMN	TLE1	TBC1D9	NT5E	IL13RA1	RIN3	GBP4	TNFSF9	LOC100505746	GDPD5	ACY3	LILRA4	LAIR1	ITM2C	ITGB7	GBP5	SKAP1	TNFRSF1B	SELL	SPG20	SH3RF1	LOXL2	KIAA0125	DHRS9	SSBP3	GBP1	GPR132	ITGB2	PTPRK	RNF130	HIST3H2A	MLF1	RAB31	LOC643733	MGC39372
c2.Crebbp.up_205	C9orf174	CELF3	ANKUB1	DNMT3L	PCDHB19P	GOLGA6L5	LOC646851	ADCY10	MMP21	SAA2	PTPRU	NHLH1	LRRN4CL	KISS1R	C14orf37	ISM2	C6orf165	UMODL1	RAB42	C3orf70	CITED1	TCP10L	CA3	TMEM95	IKZF4	EPHX3	TDRD6	SORBS1	FAM180B	NACAD	CNTD2	FUT5	PIPOX	KIAA1024	NLGN3	C10orf67	SEMA6A	CDKL4	LOC100134713	NPHP3	PCDHB14	ATG9B	PCDHB9	SHROOM1	CCNI2	LOC100616668	NEK11	C7orf53	MIR486
c2.Ep300.down_468	IGJ	VPS37B	KIAA0226L	SLAMF7	GPR132	LGMN	JAM3	LY6E	RARA	DUSP5	FAM169A	TUFT1	METRNL	PLAC8	KLF4	SPG20	PNP	NT5E	PTPN1	LRRC33	MGC39372	MIR650	PTPRK	RRP12	CNN3	RNASE6	APP	SH2B3	HOMER2	PDCD4	RELB	MLF1	TMEM71	SERPINB8	NRARP	PLEKHA1	SPRY1	ABCB1	EMP1	TPST1	SIK2	C12orf75	LAIR1	PWWP2B	KIAA0125	BEND4	IL13RA1	C8orf83	ITM2C
c2.Ep300.up_32	ZNF497	CARD9	KCNRG	LOC442421	SFN	UPB1	SCG5	KIRREL2	C11orf35	LOC100132724	PFN4	ZNF197	MIR141	MIR659	MIR103A1	LOC100306951	MIR590	BICD1	TIGD1	MIR3679	MIR3175	MIR4639	MIR2355	GPR55	C5orf39	SNORA69	DPRXP4	PCDHGA6	PCDHGB2	PCDHGB3	PCDHGB1	RASL11A
c1.Crebbp.down_500	C10orf128	TNFRSF13B	CLNK	PTGDS	PARP15	CLEC17A	EGR3	FAM167A	KLRF1	RNASE6	CD68	LOC283070	RAB31	SPATC1	KIAA1274	CAMK1D	CD4	FAR2	TMEM71	LYZ	MIR3153	MIR4645	C7orf50	ABI3	HSPA7	CYSLTR1	PTPN22	TEX9	HOXB4	CD72	LOC100130301	MIR568	FCER1G	C1orf38	GNGT2	HOXB3	SYNGR3	DNAJB4	PTGS1	PACSIN1	OBFC2A	DSE	HCST	PRICKLE1	SESTD1	RUNX2	PLCH2	SNORD116-21	HHAT
c1.Crebbp.up_500	CELF5	CAPN8	UCP1	LCT	ADCY1	EFCAB1	GPR150	OR2D2	WNT7B	LOC100379224	OSCAR	SCUBE3	PRDM12	LGALS8-AS1	CELF4	SNCAIP	ATAT1	STK19	GNAS-AS1	RRH	KLHL10	COMMD1	BRP44L	C22orf24	RPUSD2	HAUS3	LOC113230	CRELD2	UQCRFS1	TEKT2	TMLHE	ZNF814	CNKSR1	ORAI3	ANKRD20A4	DOM3Z	VTN	C5orf55	HDAC6	FAM76A	C2orf28	FBXL22	COX4NB	ATP6V0B	PPP4R1	PNMA5	TRIM45	SLC25A14	TRIM3
c2.Crebbp.down_500	HIST3H2BB	PREX1	PLAC8	SLAMF7	S100A4	LMO2	CCDC144C	KLF4	PLD4	GBP2	LY6E	JAM3	RNASE6	TNFRSF13B	LGMN	TLE1	TBC1D9	NT5E	IL13RA1	RIN3	GBP4	TNFSF9	LOC100505746	GDPD5	ACY3	LILRA4	LAIR1	ITM2C	ITGB7	GBP5	SKAP1	TNFRSF1B	SELL	SPG20	SH3RF1	LOXL2	KIAA0125	DHRS9	SSBP3	GBP1	GPR132	ITGB2	PTPRK	RNF130	HIST3H2A	MLF1	RAB31	LOC643733	MGC39372
c2.Crebbp.up_500	C9orf174	CELF3	ANKUB1	DNMT3L	PCDHB19P	GOLGA6L5	LOC646851	ADCY10	MMP21	SAA2	PTPRU	NHLH1	LRRN4CL	KISS1R	C14orf37	ISM2	C6orf165	UMODL1	RAB42	C3orf70	CITED1	TCP10L	CA3	TMEM95	IKZF4	EPHX3	TDRD6	SORBS1	FAM180B	NACAD	CNTD2	FUT5	PIPOX	KIAA1024	NLGN3	C10orf67	SEMA6A	CDKL4	LOC100134713	NPHP3	PCDHB14	ATG9B	PCDHB9	SHROOM1	CCNI2	LOC100616668	NEK11	C7orf53	MIR486
c3.Crebbp.down_500	TNFRSF13B	BATF	S100A8	CLEC17A	SLAMF7	MIR155HG	IRF4	ZBTB32	S100A9	EBI3	DUSP15	CCL22	ARID3A	CXCL13	BCL2A1	RAB29	HCK	CCR7	LOC101927931	S100A4	VAMP5	TRPM4	PLAC8	FAIM3	NRROS	CRB3	TOX2	MNDA	CYB5R2	ADAP1	LINC00152	BATF3	CD44	SLCO4A1	FCRL5	FAM46C	NFKBID	HIST3H2A	DUSP5	MIR4435-1HG	RNASE6	CAMK1D	GBP1	CPVL	CFLAR	PIM2	LINC00944	LOC283070	C1orf186
c3.Crebbp.up_500	WDR87	SMCR5	TAS2R13	EHMT2	PCDHGA8	SMAD5-AS1	PTGER4P2-CDK2AP2P2	TDRD6	ENO4	PCDHGC5	PCDHGC4	PCDHGA9	PCDHGA3	PCDHGA5	LOC101928075	CRYM-AS1	NBPF25P	CRB2	ZNF286B	LRRC37A3	PCDHGA4	KIAA1377	LOC100506083	EFCAB5	LY86-AS1	H1FX-AS1	LINC00638	PCDHGB6	PCDHGB1	FSBP	NCR3LG1	ZNF286A	LOC101927740	HERC2	PWAR5	KATNAL2	LOC100128164	PCDHGA6	LOC284632	LOC441204	FOXO3B	HERC2P9	PCDHGB3	TRO	SLC36A4	MIR600HG	LOC101927438	CCDC144B	C15orf62
shCrebbp.down_500	Suco	Hist1h2bp	Mir8115	Pcgf1	Tmem160	2810008D09Rik	Mrpl34	Hist1h2ad	Bmyc	Mrps36	Hspb1	1110065P20Rik	Fah	Ddit4	Cst7	Zfp414	Ly6k	Tspan3	4833419F23Rik	Gzma	Dbp	Cxcr3	Amica1	Cd14	Psph	Hist1h3a	Pecr	Edf1	Zfp939	Lsm3	9330133O14Rik	Ptpn18	Ltb	Nucb2	Hspa1l	Rps26	Lgals1	Kank3	Cox7b	Vmp1	Zscan2	Gngt2	Sra1	Ap2s1	Pcyox1l	Ddx49	Ndufv3	Dtd2	Ndufa4
shCrebbp.up_500	Ubp1	Ino80	Pcnt	Thoc2	Sfpq	Zfp646	Sertad2	Kdm2a	Mlxip	Dock2	Mir8092,Zfp518a	Slc23a2	Nfatc3	Shprh	Arhgap17	Ivd	Zfp644	Ubr2	Zfp445	Mef2a	Zmym2	Dock8	N4bp2l2	Ablim1	Ascc3	Cflar	Ern1	Ryr2	Prkar1a	Csnk1g1	Rsf1	Tns3	Eif5b	Dicer1	Akap13	Zcchc6	Tbl1xr1	Eif3b	Zfp36l2	Ppig	Ssfa2	Fbxl17	Atp11c	Ddx17	Prr14l	C2cd3	Itpr1	Zfp148	Mast4
MD901.loss.25.prom.g	2016-03-03	2016-03-05	2016-09-01	2016-09-07	2016-09-09	2016-09-15	AAAS	AARS2	AARSD1	ABCA11P	ABCB9	ABCD1	ABCD3	ABCF3	ABHD10	ABHD11	ABHD14A	ABHD14B	ABL1	ACAA1	ACAA2	ACACA	ACAD9	ACADM	ACADSB	ACADVL	ACAP1	ACAT1	ACBD3	ACIN1	ACLY	ACO2	ACOT7	ACSF3	ACSL4	ACTB	ACTL6A	ACTN3	ACTR6	ACVR1B	ACY1	ACY3	ADA	ADAM15	ADAM22	ADAM29	ADAT3	ADCK1	ADCK5
MD901.loss.25.enhancer.g	2016-03-01	2016-03-05	2016-09-06	2016-09-07	2016-09-09	AACS	AARS2	ABCA11P	ABCC1	ABCC6	ABCC8	ABCD1	ABCG1	ABCG2	ABHD10	ABHD11	ABHD12B	ABHD14B	ABHD15	ABLIM2	ABR	ACAA1	ACAA2	ACACB	ACAD9	ACADVL	ACAP1	ACAT1	ACBD3	ACIN1	ACLY	ACOXL	ACSBG2	ACSF2	ACSF3	ACTG1	ACTL6A	ACVR1	ACVR1B	ACY3	ADA	ADAM10	ADAM15	ADAM19	ADAM22	ADAM29	ADAM32	ADAMTS13	ADAMTS16
MD901.loss.5.prom.g	2016-03-03	2016-09-07	AARSD1	ABCD1	ABL1	ACADVL	ACLY	ACSF3	ACTL6A	ACTR6	ACY3	ADAM15	ADIPOR2	ADPRH	ADSS	AFMID	AFTPH	AHCYL1	AHSA2	AIM1	AKAP2	ALDOA	ALKBH4	ALMS1	ALOX5	AMZ2	ANAPC13	ANG	ANGEL2	ANKLE1	ANKMY1	ANKRD12	ANKRD27	ANKRD33B	ANKS3	ANP32B	ANP32E	ANXA5	AP4M1	APEH	APLF	APOLD1	APOO	ARAP2	ARF1	ARF6	ARGLU1	ARID1B	ARID3A
MD901.loss.5.enhancer.g	2016-03-01	2016-09-07	2016-09-09	ABCC1	ABCG1	ABCG2	ABHD12B	ABLIM2	ABR	ACACB	ACAD9	ACADVL	ACBD3	ACLY	ACSBG2	ACSF2	ACSF3	ACTG1	ACTL6A	ACY3	ADAM15	ADAM19	ADAM29	ADAM32	ADAMTS16	ADAMTS18	ADAMTS7	ADAP1	ADARB1	ADARB2	ADIPOR2	ADPRHL1	ADSS	AFF1	AFF2	AFTPH	AGPAT2	AHCYL1	AIM1	AK1	AKAP12	AKAP9	AKIRIN2	ALDOA	ALOX5AP	ANGEL2	ANKLE1	ANKRD1	ANKRD11
CREBBP.LY7.enhancer	AUTS2	CUX1	SNX29	ST6GAL1	FOXP1	PLCG2	XKR6	DIP2C	LPP	GAB1	PALM2-AKAP2	CCDC88C	OSBPL10	ARID5B	RERE	TNFAIP8	BLK	ETV6	RAPGEF1	DTX1	ITPKB	MSI2	FAM167A	EBF1	TPD52	CADPS	ZCCHC7	KIAA1274	RABGAP1L	AKAP13	SPRED2	PPP2R5C	RFTN1	DLG2	RAD51L1	BCAS4	C8orf12	2016-09-09	PTPRJ	BCL2L1	HIVEP2	LARGE	DEPDC6	SMARCA4	SH3KBP1	RHBDD1	ADARB2	ARHGEF3	ABLIM1
CREBBP.LY7.promoter	PCBP1	BCL6	BRD2	RGS3	CBX3	LOC100129387	HEXIM1	DUSP22	POU2AF1	ENTPD4	MND1	NCRNA00167	RNASEH2B	HERPUD1	ARRDC3	BST2	CCNG2	BLK	RFX3	UCP2	CD37	PRDM10	TBL1XR1	GABPB1	MYBPC2	HIST1H2BK	C12orf57	TUBB	HNRNPA2B1	MDC1	SET	WIBG	SERINC4	TREML2	TMC6	PSMB3	FKBP14	FLJ10038	HIST2H2BE	IGLL5	BTG2	SYK	HMGB1	CXCR4	C13orf18	SORL1	STK17B	MDM4	SGMS1
[truncated: 5,000 more columns]

## Sheet: huimin
ABC_gt_GCB_Affy	ACP1	BATF	BCL2	CCND2	CSNK1E	ENTPD1	FUT8	GOT2	IGHG1	IL16	IRF4	MARCKS	PIM1	PIM2	PRKCB	PTPN1	SLA	SP140	SPIB	TCF4
ABC_gt_GCB_LC	BLNK	BMF	CCDC50	CCND2	ENTPD1	ETV6	FOXP1	FUT8	IL16	IRF4	PIM1	PTPN1	SH3BP5	TBC1D27
Adrenal_cortex_Node4284	ABCC3	AOX1	CYP11A1	CYP11B1	CYP11B2	CYP17A1	CYP21A2	DLK1	HOXA5	HSD3B2	KCTD14	NOV	SCARB1	SLC47A1	STAR	TBX3
HSA04612_ANTIGEN_PROCESSING_AND_PRESENTATION	KLRC4	HSP90AB1	IFNA21	KLRC2	KLRC3	CD8A	PDIA3	CD8B	LGMN	HLA-DMB	RFXANK	CANX	RFXAP	HLA-DMA	TAPBP	B2M	KLRD1	LTA	CIITA	HSP90AA1	HLA-A	HLA-C	HLA-A29.1	CTSS	HLA-B	HLA-E	HLA-DQA2	HLA-DQA1	HLA-G	HLA-F	PSME1	PSME2	KIR3DL3	HLA-DPA1	KIR2DL1	CTSB	KIR2DL3	KIR2DL2	KLRC1	KIR3DL1	KIR3DL2	HLA-DRA	KIR2DL4	HLA-DQB1	HLA-DQB2	KIR2DL5A	HLA-DRB1	HLA-DRB3	NFYC
ANTIGEN_Recognition	B2M	NOS2	TNF	IL1B	IL6	CD58	CD74	CIITA	HLA-A	HLA-B	HLA-C	HLA-E	HLA-F	HLA-DMA	HLA-DMB	HLA-DOA	HLA-DOB	HLA-DPA1	HLA-DPB1	HLA-DQA1	HLA-DQA2	HLA-DQB1	HLA-DQB2	HLA-DRA	HLA-DRB1	HLA-DRB3	HLA-DRB4	HLA-DRB5
BCL6_repressed	ATR	CCL3	CCND2	CD44	CD69	CD80	CDKN1A	CDKN1B	CXCL10	CXCR4	GPR183	ID2	IFITM1	IFITM3	IRF9	NFKB1	PRDM1	STAT1	TP53
BCL6_targets_CHIPCHIP	ABCA7	ACIN1	ACOT7	ACP2	ACP6	ACYP1	AFG3L2	AGPAT5	AIDA	ALG5	ALKBH2	ALOX5	AMN1	ANKRD28	ANKZF1	ANO8	AP3B1	AP4B1	APOL6	ARHGAP1	ARHGAP10	ARID1B	ARID3B	ARID4A	ARID5A	ARL2BP	ASB7	ATAD1	ATF4	ATG4C	ATG9A	ATP6V0B	ATP6V0E1	ATP8B3	ATXN7L2	AZI2	BAG1	BANF1	BAT2D1	BLZF1	BMPR2	BRPF1	BTD	BUD31	C10orf137	C10orf4	C10orf84	C12orf61	C14orf119
B_cell_Node1500	BLK	CD79A	CR2	MGC29506	MS4A1	POU2AF1	SPIB	TCL1A
B_cell_down_anergy	ACP5	EVI2B	FES	HCK	IFI30	VIM
B_cell_up_anergy	CCND2	CCT8	CD72	CD83	CRISP3	EGR1	EGR2	GFI1	LCK	MEF2C	NAB2	NRGN	PCP4	SATB1	TGIF1	TOMM40	UBE2H
Blimp_Bcell_repressed	AICDA	ALOX5	ARHGDIB	ATP2A3	BCL6	BLNK	BTK	CD180	CD19	CD22	CD24	CD27	CD37	CD52	CD53	CD74	CD79A	CD86	CIITA	CR2	CXCR5	DEK	EBF1	FCER1G	FCER2	FCRLA	GCET2	GPR18	HLA-DMB	HLA-DPA1	HLA-DPB1	HLA-DQA1	HLA-DRA	HLA-DRB1	IL16	INPP5D	IRF8	LRMP	LYN	MS4A1	MYBL1	MYO1E	NR1H2	PAG1	PAX5	PCDHGC3	PLEK	POU2AF1	POU2F2
Blimp_proliferation_repressed	ACTB	ACTG2	ACTL6A	ADSS	ANP32A	ARPC2	AURKA	BCKDHA	C6orf108	CDC123	CDC2	CDC20	CDC37	CDK2	CDKN2C	CHKA	CKS1B	CKS2	CLPP	CORO1A	CSK	CYFIP2	DAXX	DHFR	DNMT1	DUT	EIF2S2	EIF4EBP1	EXOSC5	FTH1	GMPS	GNAI2	GNAS	GNB1	GNB2	GOT2	GSK3A	GSTP1	HADH	HIF3A	IFI16	IKZF1	LCK	LCP1	LDHA	MAP2K1	MCM2	MCM4	MCM7
Blood_CD4+Tcell_gt_thymic_SP_CD4+Tcell	AIM1	AK5	BEX5	BST2	C1orf162	C20orf118	CD48	CEP68	CKAP4	CXCR4	DHRS7	DOCK9	EPPK1	EVI2B	FAM113B	FAM153B	FLJ43663	GBP5	GIMAP5	GIMAP8	IL10RA	IL11RA	IL6R	ISG20	KIAA0746	KLF3	LITAF	LOC439949	LRIG1	MAP3K5	MICA	NBPF8	NELL2	NFKBIZ	NPC2	NR3C2	PASK	PION	PLEKHA1	PRKCA	RASA3	RASGRF2	RNF157	RPL35A	SERPINB6	SH3BP5	SLC26A11	SLC39A10	SLC40A1
BreastCa_70gene_Bad	C16orf61	C20orf46	CCNE2	CDC42BPA	CENPA	COL4A2	DCK	DIAPH3	DTL	ECT2	EGLN1	ESM1	EXOC7	EXT1	FBXO31	FLT1	GMPS	GNAZ	GPR126	GPR180	HRASLS	IGFBP5	JHDM1D	LOC286052	LPCAT1	MCM6	MELK	MMP9	NDC80	NMU	NUSAP1	ORC6L	OXCT1	PALM2-AKAP2	PITRM1	PRC1	RAB6A	RFC4	SERF1A	SLC2A3	TMEFF1	TSPYL5
BreastCa_70gene_Good	ALDH4A1	AP2B1	BBC3	DHX58	EBF4	FGF18	GSTM3	MS4A7	PECI	SCUBE2	STK32B	TGFB3	WISP1
BreastCa_Bone_Metastasis	ADAMTS1	AOX1	C13orf15	CCDC68	CRADD	CTGF	CXCR4	DDX10	DUSP1	ENDOGL1	FARSA	FGF5	FHL1	FST	FYN	GTSE1	HIST1H2AC	HIST1H2BH	HIST2H2AA3	IL11	KHDRBS3	LRRC20	MCAM	MITF	MMP1	MRPS18B	NAP1L3	NCF2	NEDD4L	PCTK2	PFN2	PTK7	RMND5A	SAMD4A	SIX2	SLC4A7	SLC5A3	SOCS2	SOS1	SPAST	SRGN	ST3GAL6	TRMT1
CD40_downregulated_Burkitt_lymphoma	AIF1	ALDH5A1	AQP3	ARHGEF18	ARL4C	BCL6	BICD2	BIK	BLNK	BMP7	BTG2	C3orf37	CAMP	CD27	CD38	CDH17	CNR1	CRYZ	CSF2RB	CTDSP2	DFNA5	ELN	FAM106A	GCNT1	GPER	GRAP	HDAC9	HSD17B8	ID1	ID3	IGFBP6	IGJ	IRS1	ISG20	ITGB7	KCNN3	LETMD1	LMO3	LTB	MEF2B	NCF4	NCOR1	NINJ1	NPAS1	PALM2-AKAP2	PNOC	POLR2J2	POU2AF1	PRKAR2B
CD40_upregulated_Burkitt_lymphoma	ADAM8	ARHGEF2	ARID5B	BATF	BCL2	BCL2A1	CAPG	CCL22	CCL3	CCL4	CCR7	CD40	CD44	CD58	CD74	CD83	CFLAR	CHD1	CR2	CXCR5	DDIT4	DUSP2	ECOP	EHD1	ELL2	FDPSL2A	GADD45B	GPR183	HLA-DMB	HLA-DPB1	HLA-DQA1	HLA-DQB1	HLA-DRB1	HLA-F	HTR3A	ICAM1	ICOSLG	IER3	IFI30	IGHG1	IL1B	IL24	IRF4	IRF5	IRF9	JUNB	KCNN4	KRT7	LAPTM5
CD4_T_U133plus	C6orf105	FBXL16	PTPN13	ST6GALNAC1
CD8_T_U133plus	CD8A	CD8B	SMAD1
CD8_T_effectorDn_memoryDn_NaiveUp	ACTN1	AIF1	CD248	CEP170	DHRS3	FCHO1	HYAL2	IFNGR2	KCTD12	PLAG1	PTPN6	SNPH	USP44	ZNF510
CD8_T_effectorDn_memoryIm_NaiveUp	ARL4C	CCR7	CEP68	CTSC	DLL1	EPN2	FAM153B	FKBP5	GCA	GCH1	GNPDA1	GPR18	GUK1	HABP4	ITPKB	JAM3	LRRC8D	MAST4	MYC	NAP1L3	PDE3B	PDE9A	PECAM1	POLH	POU2F2	SELL	SNN	SOCS3	TMEM63A	ZNF204	ZNF223
CD8_T_effectorDn_memoryUp_NaiveUp	C12orf24	GZMK	IL7R	LIMS1	SMAD3	SMC4	TRAT1
CD8_T_effectorUp_memoryIm_NaiveDn	ACTN4	ACTR1A	ADRB2	ALB	APOBEC3B	BCR	CCL4	CEBPA	DERL1	EFHD2	FTSJD2	GZMH	H2AFX	HLA-DPA1	HRASLS3	IFI16	IL7R	KLRD1	LZTS1	MTM1	NFKBIA	OLFM1	RHOC	SH3BP5	SLC2A8	TCIRG1	TGFBR3	USP28	VCL
CD8_T_effectorUp_memoryUp_NaiveDn	ARHGDIA	ATG2A	BATF	CACNB3	CD58	CD74	DAPK3	EPHA4	FAM129A	GDE1	GGA2	GYG1	ITGB1	KIF22	KLRB1	OSBPL7	PEA15	PLCD1	PLXND1	PTGER2	PTPN7	RAB27A	SH2D2A	SH3KBP1	SLC1A5	SLC27A2	SLC38A6	SPAG1	TNIP2	TRIP4	WDR91
CLL_mutated_gt_CLL_unmutated	BANK1	CD274	CD82	EGR3	FCRL2	FCRL3	FGL2	FUT8	GEN1	MDFIC	PDLIM1	RASGRP1	SESN3	SLAMF1	SNED1	ZBTB20
CLL_unmutated_gt_CLL_mutated	APBB2	CASP3	CLEC2B	CRY1	DTX1	FKBP5	FLNB	GLO1	HIST2H2AA3	IFI44L	IL6ST	ITGB5	LPL	LTK	MSI2	MYLK	PFKP	RRBP1	TCL1A	TGFBR3	TPST2	VAMP5	WSB2	XBP1	ZAP70
CNS_Node1661	A2M	ABCA8	AKAP12	AMOTL2	ANK3	APOC1	APOD	APOE	CACNG4	CADM1	CAMSAP1L1	CDO1	CLU	CNN3	COLEC12	COX7A1	CRYAB	CSRP2	CTTN	CX3CL1	CXCL14	DDAH1	DDEF2	DDR1	DKK3	DMN	DPYSL3	DST	EFEMP1	EFHD1	EFS	ENTPD3	EPAS1	EPHX1	ERBB3	ETV5	FERMT2	FHL1	FLRT2	FRZB	FXYD1	FXYD6	FZD4	GJA1	GPC1	HSPA12A	HSPB8	HTRA1	ID4
CNS_PNS_Node1663	A2BP1	AAK1	ACCN1	ACTL6B	ADCY1	ADCY2	AGXT2L1	AK5	ALDOC	AMPH	ANK2	ANK3	APBA2	APC2	APLP1	AQP4	ARHGDIG	ARHGEF4	ARHGEF9	ARNT2	ARPP-19	ARPP-21	ASTN1	ATP1A2	ATP1A3	ATP1B2	ATP2B2	ATP6V1G2	ATP8A2	ATP9A	B3GAT1	BAALC	BAI2	BAI3	BCAN	BCAS1	BEX1	BSN	C16orf45	C1orf61	C1orf95	C20orf39	CA10	CA11	CABP1	CACNG3	CALM1	CALY	CAMK2A
CNSonly_Node1460	ATP13A2	ATP6V0E2	CALM1	CBX6	CLASP2	CLSTN1	DPYSL2	IDS	KIAA0513	MAPRE2	MOAP1	NDRG3	PEA15	PPP3CA	PPP3CB	PRKACB	RNF41	TUBA1A
Cell_cycle_Cho	ABCB1	ACOT2	ACTN1	AHNAK	ALPK2	AMBP	AMPD2	ANGPT1	ANKRD17	ANKRD36B	AP1M1	APOA1	ARF6	ARHGAP29	ARHGEF11	ARHGEF2	ARL5B	ARL6IP1	ARPC1B	ASGR1	ATAD2	ATF3	ATF4	ATP5C1	ATP6V1E1	AURKA	AVPR2	AZI2	BCL9	BLOC1S2	BMP2K	BMPR1A	BRIP1	BSCL2	BUB1	BUB3	C11orf58	C12orf11	C13orf33	C14orf4	C16orf35	C17orf91	C1orf27	C1orf56	C20orf3	C21orf59	C3orf1	C4orf18	C4orf8
Cell_cycle_Cho&Whitfield	ARL6IP1	ATAD2	AURKA	BUB1	BUB3	C11orf58	C9orf140	CAPN7	CASP3	CCNA2	CCNB1	CCNB2	CCND1	CCNF	CDC2	CDC20	CDC25A	CDCA7	CDCA8	CDKN2D	CENPA	CHAF1B	CKAP5	CKS1B	CKS2	CTSD	DLGAP5	DNAH11	DSPP	E2F5	FABP1	FAM64A	FAM83D	FOXM1	GMNN	GRPEL1	H1F0	H2AFX	HIST1H2AC	HIST1H4C	HMMR	IL10	JARID1B	KIAA1333	KIF11	KIF14	KIF23	KIF2C	KIFC1
Cell_cycle_Liu	ACPP	ADH4	AEN	AKIRIN2	ALKBH7	ANKRD10	ANLN	AOC3	APEX2	ARGLU1	ARL4A	ARL6IP1	ARL6IP2	ATAD2	AURKA	AURKB	BIRC5	BRD8	BRIP1	BUB1	BUB1B	BUB3	C11orf82	C13orf34	C14orf106	C14orf142	C16orf57	C20orf111	C20orf96	C5orf42	C9orf100	C9orf140	CALM2	CASP2	CASP3	CASP8AP2	CCDC90B	CCDC99	CCNA2	CCNB1	CCNB2	CCNE1	CCNE2	CCNF	CDC2	CDC25A	CDC25B	CDC27	CDC6
Cell_cycle_Whitfield	ABCA7	ABCC2	ABHD10	ACD	ACYP1	ADAMTS1	ADCY6	ADH4	AFAP1	AGK	AGPAT3	AHI1	AIFM2	AKAP13	AKIRIN2	AMD1	ANKRD10	ANKRD40	ANLN	ANP32B	ANP32E	ANTXR1	AOC2	AOC3	AP3D1	AP4B1	APEX2	ARGLU1	ARHGAP11A	ARHGAP19	ARHGDIB	ARL4A	ARL6IP1	ARL6IP2	ARMC1	ASF1A	ASF1B	ASPHD2	ASXL1	ATAD2	ATF7IP	ATRX	ATXN1L	AURKA	AURKB	BAG3	BAIAP2	BARD1	BBS2
DC_TLR4_TLR8_synergy	AREGB	BTG1	CDKN2B	CITED4	CLC	CSF2	CSF3	DEPDC7	DUSP2	EGR3	FOXF1	GFPT2	GNG2	GRAP	GSTA4	IL12A	IL1F9	IL23A	IL29	KISS1R	LAMC1	LIF	LOC387763	MGC16121	MMP10	MMRN2	OSR2	OXTR	PERP	RGS16	RHCG	TDH	TFPI2	TPBG	TSLP
Dendritic_cell_BDCA1pos_blood	ASGR2	C9orf165	CD163	CD1A	COL9A2	CSF3R	DHRS9	DTNA	FLJ10357	HBEGF	IL13RA1	IL1R2	IL1RN	IL27RA	LAYN	MICAL2	MPP7	NOS3	RTN1	SERINC5	SGMS2	SGSH	SLC2A3	TNFRSF10D	VCAN	VSIG4
Dendritic_cell_BDCA1pos_tonsil	FCGR2C	MTSS1	TREML1	VCAN
Dendritic_cell_BDCA3pos_blood	AP3M2	APOL1	APOL3	B3GNT7	BATF3	C13orf31	C1orf165	C1orf54	C8orf47	CADM1	CAMK2D	CCDC126	CCND1	CD59	CLCN4	CPNE3	CSRP1	CYP2E1	DGAT2	ENOX1	ENPP1	FARS2	FKBP1B	GAS2L3	GCET2	GPER	GPR126	GRAMD2	GRHL1	HLA-DOB	INDO	INDOL1	IRAK2	KIF16B	KIT	LIMA1	LOC100131989	MIST	MRC2	MTERFD3	MYLK	NCALD	NEDD4L	NET1	NMNAT3	NUBPL	PAM	PARP3	PAWR
Dendritic_cell_CD123pos_blood	ACSL3	ADC	AEBP1	AHI1	AKR1C3	ALDH5A1	ALOX5AP	AMIGO2	ANKRD36B	APBB1IP	APP	AQP3	ARHGAP24	ASIP	ASPH	ATP13A2	BCL11A	BIC	BLNK	BSPRY	BTG3	C10orf118	C10orf137	C10orf58	C11orf31	C13orf18	C17orf86	C20orf103	C5orf28	C5orf29	C6orf65	C7orf29	C7orf31	C7orf41	C8orf59	C9orf102	C9orf45	C9orf86	C9orf91	CARD11	CCDC50	CCR2	CD164	CD2AP	CD36	CDC14A	CDCA7L	CDH23	CDK5R1
Dendritic_cell_CD123pos_tonsil	AHI1	AKR1C3	C18orf1	C20orf103	C9orf86	COBLL1	COL24A1	DACH1	EPHA2	EPS8L2	FLNB	FZD3	GPM6B	IL3RA	ITM2C	KCNA5	KCNK10	LEPREL1	LHFPL2	LOC158402	PFKFB2	PTCRA	PTGDS	SCAMP5	SLC7A5	TNFRSF21	TOX2	VASH2	hCG_2024094
Dendritic_cell_CD16pos_blood	ADM	ARRB1	BCL2A1	BLVRA	CALML4	CDC42EP3	CLCF1	CLIP4	COTL1	EPB41L3	FCGR3B	FOXO1	GBP5	GPR137B	HMOX1	IL15	MARCKS	MRAS	MS4A7	MYO1G	NCRNA00084	NEFH	P2RY13	PFKFB4	PTGER2	RIN2	SAMD4A	SAT1	SERPINA1	SIGLEC10	SLA	SLC7A7	SMAD1	SPRED1	SRXN1	TCF7L2	TIAM1	TLR8	TUBA4A	UBASH3B	ULK2
E2F3_overexpression_2x_up	ABCG2	ABHD7	ALDH5A1	ANKRD18A	ATAD2	ATRNL1	BAI2	BCOR	BRI3BP	C12orf34	C20orf112	C22:CTA-250D10.9	C6orf168	CAMK2N1	CCNE1	CCNE2	CCNO	CD83	CDC20B	CDC2L6	CDKN1C	CDKN2C	CEBPA	CHML	CHST1	CHST2	CHST7	CMPK2	CP110	CRELD2	CRY1	CSPG5	DCK	DCLRE1B	DDAH1	DMN	DSCR6	DTL	E2F7	EEF1A2	ENO2	EPB41L4A	FAM119A	FAM92A1	FANCA	FEN1	FGF9	FGFR3	FLJ25076
E2F3_overexpression_4x_up	C12orf34	C6orf168	CCNE1	CCNE2	CD83	CDC20B	CDKN1C	CDKN2C	CEBPA	CMPK2	DMN	E2F7	ENO2	FGF9	FGFR3	FLJ25076	FLJ42562	GKAP1	HEY1	IL17RB	KISS1R	LOC116236	LYPD6	MMP15	MYB	NEFL	NR2F1	PEG10	PLCL2	RRAGD	SBK1	SCN8A	SMAD6	STRA13	TM6SF1	TMEM155	TMEM158	TMEM20	TPPP	ZDHHC23	ZNF367	ZNF483
Endothelial_precursor_GNF	A2M	APOE	APOL4	C1QB	C1QC	C4A	CCL18	CD5L	CHL1	CHRDL1	COL1A2	COL3A1	CP	CRH	CTGF	CXCL12	DYRK1A	ELTD1	ENPEP	EPAS1	FABP4	FGFR3	FN1	FRZB	FSTL1	GJA1	IGF2	IGFBP5	LCAT	LEPR	LPL	LTBP2	MUC1	NMU	NNMT	OLFML3	PDE2A	PPAP2B	PTMS	RAI14	RPS6KL1	SEPP1	SLC10A4	SYNGR1	TF	TNC	VCAM1
Epithelial_keritin_Node1641	DSP	KRT14	KRT15	KRT17	KRT4	KRT5	KRT6A	KRT6B	LYPD3	PERP	PKP1	S100A2	S100A7	SERPINB5	SFN	SPRR1A	SPRR1B	SPRR3	TRIM29
Epithelium_Node1413	ALDH1B1	ARL6IP2	CAMK2D	CDC5L	MEFV	MYH9	PNO1	SNW1	SPN	ZNF835
Epithelium_Node5693	CLCA2	CRCT1	DSC2	DSG1	IL1RN	KRT16	PTK6	SCEL	TGM1
Erythrocytic_Node1660	ALAS2	BZRPL1	CA1	EPB42	ERAF	GYPA	GYPB	HBD	HBQ1	KLF1	RHCE	RHD	SLC4A1	SPTA1
Erythroid_precursor_GNF	ABCB6	ABCC13	ABCG2	ACHE	ACP1	ACSL6	ADIPOR1	AKAP8L	AKIRIN2	ALAD	ALAS2	ALS2CR2	ANK1	ANKLE1	AQP1	ARF4	ARG1	ARHGEF12	ARL4A	ART4	ASCC2	ATG4A	ATP1B2	BAG1	BCL2L1	BMP2K	BNIP3L	BPGM	BSDC1	BSG	BZRPL1	C12orf51	C13orf15	C14orf68	C16orf35	C1orf128	C1orf177	C1orf91	C5orf4	CAT	CCNF	CCRL2	CCS	CDC27	CDC34	CDH11	CDRT1	CKM	CLCN3
Follicular_dendritic_cell	C4orf7	CLU	CXCL13	PRNP
Follicular_lymphoma_Immune_Response1	ACTN1	ATP8B2	BIN2	C1RL	C20orf112	CAMK1D	CD7	CD8B	DDEF2	FAM46A	FLNA	FLT3LG	FNIP2	GALNT12	GNAQ	HCST	IL7R	INPP1	ITK	JAM3	KIAA1128	LEF1	LGALS2	LOC150166	PMEPA1	PTRF	RAB27A	RALGDS	SEMA4C	SEPW1	SKI	STAT4	TBC1D4	TEAD1	TMEM173	TNFRSF1B	TNFRSF25	TNFSF12	TNFSF13B	TTC39B
Follicular_lymphoma_Immune_Response2	ANKRD57	BLVRA	C1QA	C1QB	C3AR1	C4A	C6orf145	DHRS3	DUSP3	F8	FCGR1A	GPRC5B	HERC5	HOXD8	LGMN	ME1	MITF	MRVI1	NDN	OASL	PELO	SCARB2	TLR5
G2_M_phase	ASPM	AURKA	AURKB	BIRC5	CENPF	PLK1
GCB_gt_ABC_Affy	BCL6	CSTB	FAM3C	ITPKB	LMO2	LRMP	MME	MYBL1	SPINK2	VCL
GCB_gt_ABC_LC	BCL6	DENND3	ITPKB	LMO2	LRMP	MME	MYBL1	NEK6	SAMD12	SERPINA9
GC_B_DLBCL_survival	BCL6	GCET2	SERPINA9
GC_B_cell_BL_equal_DLBCL	A4GALT	ABCA11P	ACTR2	AICDA	AIF1	ALPK1	ANUBL1	AP4S1	APLN	ARHGAP19	ARL17	ARL5B	ARSG	ATP8A1	BCAS4	BCL6	BFSP2	BICD1	BPTF	BRWD1	BTNL9	C13orf31	C1orf172	C20orf196	C4orf22	C4orf7	C7orf10	C9orf66	CAMK2B	CCDC126	CCDC147	CCDC23	CCDC69	CCNB2	CD180	CD27	CDC2L5	CECR7	CLLU1	CMPK2	COTL1	CR1L	CTPS2	DAAM1	DBNL	DCK	DDEFL1	DENND2D	DFNA5
GC_B_cell_BLhigh_DLBCLlow	ACY3	AFF2	ANK1	BCL7A	BMP7	BTN1A1	C3orf37	C4orf34	CADPS	CCDC88A	CD38	CTNNBIP1	CYP39A1	DNASE1	DOK3	FANCA	FHOD3	FLJ40330	GCET2	KIAA0922	LHFP	LOC285286	LOC730272	MME	NY-SAR-48	PEG10	PEX5	PRDM15	RNFT2	SSBP2	ST14	SUSD3	TNFSF8	VPREB3	XKR6	ZNF581
GC_B_cell_BLlow_DLBCLhigh	AIM2	ASB2	C21orf7	CD80	CD86	CLIC5	CLIP2	CLIP4	CR2	DCN	DENND1B	DHRS9	EHD3	EPSTI1	ETS1	FAM105B	FGD6	GDPD5	GSN	HECW2	HOPX	HSPA12A	ILDR1	KCNMA1	LMO2	LOXL2	LRCH3	MAML3	MET	MGC70870	NINJ2	PLXNB2	PTAFR	RRAS2	RSAD2	SERPINA9	SLC1A1	SLC4A8	SMPDL3A	SOCS1	SPAG16	SYTL4	TBC1D2	TEX9	TGM2	TIAM2	TMEM163	TNFSF10	TOX
GC_B_cell_U133Plus	A4GALT	ABCA11P	ACTR2	ACY3	AFF2	AICDA	AIF1	AIM2	ALPK1	ANK1	ANUBL1	AP4S1	APLN	ARHGAP19	ARL17	ARL5B	ARSG	ASB2	ATP8A1	BCAS4	BCL6	BCL7A	BFSP2	BICD1	BMP7	BPTF	BRWD1	BTN1A1	BTNL9	C13orf31	C1orf172	C20orf196	C21orf7	C3orf37	C4orf22	C4orf34	C4orf7	C7orf10	C9orf66	CADPS	CAMK2B	CCDC126	CCDC147	CCDC23	CCDC69	CCDC88A	CCNB2	CD180	CD27
GC_T_helper_down_Kim	ACSM2A	C10orf11	CLASP2	DHRS3	DOCK4	DUSP8	ELL2	FLJ43663	GARNL4	IRS2	LRRTM3	OSBP	PER1	PFTK1	RORA	RYBP	S1PR1	SH3D19	SPTBN1	SVIL	USP12	ZNF331
GC_T_helper_up2x_Chtanova	AACS	ABAT	ABCG1	AFF3	AKAP13	AKR1C2	AKR1C3	AMPD3	ANKRD13A	AP3S2	APBB1IP	ARID1B	ARRDC3	ASCL2	ATAD2B	ATG2B	ATP1B3	ATP8A1	BAZ2B	BCAT1	BCL6	BCL7B	BCL9L	BTG2	BTLA	C10orf104	C11orf54	C11orf65	C14orf145	C14orf4	C18orf1	C21orf57	C2CD2	C3orf21	C3orf37	C5orf41	C6orf204	C9orf16	C9orf164	CA8	CAMK2N1	CAMSAP1	CASD1	CASP4	CATSPERB	CAV1	CBX4	CCDC64	CCNYL1
GC_T_helper_up4x_Chtanova	AFF3	AKR1C2	AKR1C3	AMPD3	ASCL2	BAZ2B	BCL6	BCL7B	BCL9L	BTLA	C14orf145	C18orf1	C2CD2	C3orf21	C5orf41	CA8	CAMK2N1	CASP4	CATSPERB	CAV1	CD200	CD27	CD84	CDK5R1	CDKL2	CEBPA	CHGB	CHI3L2	CHMP7	CLEC7A	CNIH3	CTTN	CXCL13	CXCR5	CXXC5	DBH	DCBLD1	DDEF1	DKFZp781N1041	DUSP1	EFNB2	FAM134B	FAM3B	FAM43A	FAM91A2	FBLN7	FGFR2	FKBP5	FLJ31104
GC_T_helper_up_Chtanova_and_Kim	AMPD3	BCL6	CASD1	CHGB	CHI3L2	CXCL13	KSR2	NCKAP1	PHACTR2	PITPNC1	PON2	POU2AF1	PPP1CC	SH2D1A	STK39	TBC1D4	TOX	ZNF638
GC_T_helper_up_Kim	AMPD3	ANKRD11	AP1S2	BCL6	BRWD2	C12orf35	C17orf42	CASD1	CHGB	CHI3L2	CPSF2	CREBL2	CXCL13	DNAJB6	EGR2	ERMP1	ETS1	FEM1B	FLJ20160	HDHD1A	HIBCH	HPRT1	IQGAP1	KLHL6	KSR2	LZTFL1	MAN1A1	MDM4	MYH10	NCKAP1	NECAB1	NOS3	OSTM1	PAWR	PHACTR2	PITPNC1	PON2	POU2AF1	PPP1CC	PPP3CB	PRKACB	PRPF38B	RPS6KA3	RUFY1	SERF1A	SH2D1A	SLC25A46	SLC35F5	SNRPN
Germinal_center_Bcell_DLBCL	BCL6	BCL7A	C17orf60	C3orf37	C8orf80	CCNG2	CUX1	CYorf15A	DNAJC10	DTX1	ELOVL5	FAM102A	FAM113B	FLJ42418	GCET2	HDAC7	KATNAL1	KIAA0746	KLHL5	KLHL6	LOC100129447	LOC90925	LRMP	MAN2C1	MAP4K2	MAPK10	MAST2	MEF2B	MFHAS1	MME	MYBL1	OGG1	OSBPL3	PAG1	PCDHGC3	PIK3CG	PRPSAP2	PTK2	RAPGEF5	RGS13	RUNDC2B	SAMD12	SERPINA9	SFRS15	SLC1A1	SMARCB1	SORL1	SPRED2	STAP1
Glucose_starve_down	AAMP	ABO	ADCYAP1	ADNP	AGL	ARF4	ARHGEF6	ARPC5	ARTN	ASF1A	ATP2A2	ATP5J	ATP6V0B	AURKA	BAZ1A	BCL2	BFSP2	BMP1	C1orf77	CALM1	CAPZA1	CCNG1	CCT4	CD47	CD86	CDC2	CDC7	CLP1	COMT	CREM	DAPK2	DEK	DKK4	DNAJA1	DNAJB6	DPYSL2	DST	DVL3	DYRK1A	E2F1	E2F4	ECE2	EHD1	EIF1B	EIF2B4	EIF3H	EIF4H	ELL	ELMO1
Glucose_starve_up	AARS	ACD	ACTA1	ADA	ASNS	ATF5	BCAT2	C11orf80	C1orf61	C2orf27	CARS	CEBPB	CLCN6	CORO1A	CTTN	DRAP1	FKBP2	GART	GM2A	GPX6	HNRPDL	IDH2	IGHM	LTBR	MAP2K3	MFNG	MGST2	MS4A1	MS4A2	MYB	OCLN	PCK2	PLOD1	POU2F2	PRB4	PYCR1	SAPS2	SC4MOL	TCF20	TOMM40	UCKL1	UNC119	WARS
Glutamine_Glucose_starve_both_down	AATF	ACADVL	ACAT2	ACIN1	ACVRL1	ADA	ADRM1	AES	AHSA1	AK2	AKR7A2	ALDH2	ALDH4A1	AMD1	AP4M1	ARF1	ARHGAP1	ARID4B	ARL2BP	ARMET	ARPC3	ASCL1	ASNS	ASS1	ATF5	ATP1B3	ATP2A2	ATP2A3	ATP5G3	ATP6AP1	ATP6V0A2	ATP6V0C	ATP6V0E1	BASP1	BCAP31	BCKDHA	BCL6	BCL7A	BCS1L	BLOC1S1	BMP1	BNIP3L	BRD3	BRD8	BRF1	BTG2	BTK	BYSL	C1QBP
Glutamine_Glucose_starve_both_up	ACTA1	ADA	ASNS	ATF5	BCAT2	CARS	CEBPB	IDH2	PYCR1	WARS
Glutamine_starve_down	ABCF1	ACAT2	ACLY	ADAM19	ADCY3	ADRM1	AHSA1	AK2	ALDOA	ALG3	ALG8	AMD1	ARID4B	ARMET	ARS2	ATP1B3	ATP2A2	ATP5G3	ATR	BAZ1A	BCAP31	BMS1	BOP1	BTK	BYSL	BZW1	C11orf9	C19orf50	C1QBP	CAD	CALR	CAPRIN1	CCDC6	CCNB1	CCND1	CCT2	CCT5	CCT6A	CDC123	CDC20	CDC25A	CEBPZ	CELSR2	CHD4	CLIC1	CNGB1	COG2	COPS3	CSE1L
Glutamine_starve_up	AARS	ABCB9	ABI1	ACADVL	ACP1	ACTA1	ADA	ADD3	AIM1	AKR7A2	ALDH2	ALDH6A1	APBB3	ARID3A	ARL2BP	ARRB2	ASMTL	ASNS	ASS1	ASXL1	ATF4	ATF5	ATP5S	ATP6V0A1	ATPAF2	ATRX	BACH1	BAI2	BARD1	BCAT2	BCKDHA	BCKDHB	BCL7A	BCL9	BIRC5	BLK	BLOC1S1	BMI1	BMP7	BNIP3L	BRD8	BTG1	BTG2	BUD31	C1orf77	C21orf33	C2CD3	C6orf130	CABIN1
Glycolysis	ENO1	GAPDH	LDHA	PGAM1	TPI1
HIF1alpha_1.5x_Up	ABCA1	ACVR1B	ADM	ADORA2A	AFAP1	AK3L1	AK3L2	ANGPTL4	APOD	ARL4C	ATP2C1	ATXN1	B3GALT4	BACE2	BCL6	BGN	BHLHB2	BNIP3	BNIP3L	C8orf4	CD200	CDH2	CDKN1C	CHST1	CHSY1	CLIP2	COL18A1	COL1A2	COL4A1	COL4A2	COL5A1	COL9A1	CUBN	CX3CL1	CXCR4	CXCR7	CYP4F11	DCHS1	DDIT4	DKK3	DUSP6	EDN1	EGLN1	EGLN3	ENO2	ENPP1	EPOR	ERO1L	F8
HIF1alpha_1.5x_down	ABCF2	ACAT2	AKAP1	AMDHD2	ARS2	ASF1B	BARD1	BOP1	BRCA1	BYSL	C11orf48	C12orf48	C12orf52	C17orf80	C1orf112	C20orf27	CAD	CCDC99	CCNA2	CCNE1	CCNE2	CCNF	CD3EAP	CDC2	CDC6	CDC7	CENPN	CHAF1A	CIAO1	CPN2	CSE1L	CTPS	DBF4	DDX11	DDX19A	DDX21	DGCR11	DHCR24	DHCR7	DHFR	DHX35	DKC1	DLAT	DLEU2	DNA2	DNAJC9	EBNA1BP2	EEF1E1	EIF2B3
HIF1alpha_2x_Up	ABCA1	ADM	ADORA2A	AK3L1	AK3L2	ANGPTL4	B3GALT4	BACE2	BGN	BHLHB2	BNIP3L	C8orf4	CDKN1C	COL1A2	COL5A1	CX3CL1	CXCR4	DDIT4	DUSP6	EGLN1	EGLN3	ENO2	ENPP1	FAM128B	GABRP	GALNAC4S-6ST	GJA5	GPC1	IGFBP3	INHBA	INHBE	INSR	JMJD1A	KANK3	LOX	LRRC32	MAFF	MGC13053	MN1	NARF	NDRG1	NEDD9	NFASC	NOTCH4	P4HA1	PDZD2	PLCG2	PLOD2	PPARG
HIF1alpha_2x_down	AMDHD2	BRCA1	C12orf52	CCNE2	CCNF	CDC6	CHAF1A	DDX11	DGCR11	DLEU2	ELK1	ELOVL6	EMG1	ERCC6L	EXO1	FBXO5	GINS1	GINS2	HIST1H3D	LRP8	MCM10	MCM2	MCM4	MCM5	MLLT10	MRTO4	NUP98	PBK	POLR3K	PPARD	PRMT7	RGS4	RRM2	SKP2	SLC19A1	SLCO4A1	TIPIN	TSFM	TSR1	TTLL4
HRAS_overexpression_2x_down	ABCA1	ADAMTS5	AHNAK2	ARHGEF9	BCL6	C7orf49	CASP1	CCNL1	COL12A1	COL27A1	CYP1B1	CYP2R1	DDX17	DKK3	DLL1	DNAJC6	EFNA5	EPHA4	FAM46B	FBXO9	FGFR2	FLJ27365	FN1	GAS1	GLCCI1	GRHL2	HIST1H1E	HIST1H2AC	HMGN3	HNRNPH1	HOXC6	IL23A	IRX2	KANK4	KIAA0528	KIAA0802	LATS1	LGALS8	LOC100130506	LOC203274	LOC730256	LRIG3	LYN	MALAT1	MBNL2	MDH1	MED25	MID1	MLL3
HRAS_overexpression_2x_up	ACOT7	ADAM8	ADRB2	AGPAT9	AKAP12	ANGPTL4	ARG2	ARHGAP25	ARHGAP27	ATP2B1	B3GNT5	B4GALT1	BMP2	C14orf139	C16orf74	C19orf10	C6orf141	C9orf46	CALM2	CALU	CAPZA1	CCL20	CCNA1	CD274	CD55	CDCP1	CHST11	CLCF1	CSNK1E	CXCL1	CXCL2	CXCL3	CXCL5	CYP27B1	DENND2C	DLST	DUSP1	DUSP4	DUSP5	DUSP6	EFNB1	EGR1	EHD1	ELK3	ELOVL7	EPAS1	EPHA2	EREG	FAM110C
HRAS_overexpression_4x_up	ADAM8	AKAP12	ANGPTL4	ARHGAP25	ARHGAP27	B3GNT5	BMP2	C14orf139	C9orf46	CCL20	CD55	CDCP1	CHST11	CLCF1	CXCL1	CXCL2	CXCL3	CXCL5	DUSP1	DUSP4	DUSP5	DUSP6	EGR1	ELK3	ELOVL7	EPAS1	EPHA2	EREG	FAM110C	FAM83A	FERMT1	FLJ43663	FOS	FOSL1	G0S2	GJB3	GJB5	HBEGF	HPSE	HRAS	IER2	IER3	IL11	IL13RA2	IL1A	IL1B	ITGA2	JMJD3	JUNB
Hemaglobin_Node98	HBA1	HBA2	HBB
Hematopoietic_Node1658	ADRBK1	ALOX5AP	ARHGAP25	ARHGAP4	ARHGDIB	ARPC1B	ARPC4	ATP2A3	BIN2	BTG1	BTN3A2	BTN3A3	CCL5	CD37	CD48	CD52	CD53	CECR1	CENTB1	CNPY3	CORO1A	COTL1	CTSS	CXCR4	CYBA	DENND2D	DHX8	DOCK2	DPEP2	ELF1	ELF4	EVI2B	FGR	FMNL1	GIT2	GMFG	HCLS1	HMHA1	ICAM3	IKZF1	IL10RA	IL27RA	ISG20	LAIR1	LAPTM5	LAT2	LCP1	LCP2	LIMD2
Hematopoietic_Node1659	ACP1	BAX	CD2BP2	DAP3	DDX23	EHD1	ELAC2	GIYD2	ILF3	NUP93	PPP4C	PRR14	RBM10	RRP7A	SNX17	UTP3	WBP11	WDR68
IFN_PMBC_2x_Up	ACTA2	ADAM19	ADAR	AFF1	AGRN	AIM2	ANK3	APOBEC3B	APOBEC3G	APOL1	BAK1	BST2	CASP10	CASP7	CCDC75	CCL7	CCL8	CD164	CD38	CD69	CEACAM1	CNP	CXCL10	CXCL11	CXCL9	CYP2J2	DEFB1	DNAJA1	DRAP1	DUSP5	DYNLT1	ENDOD1	FAS	FASLG	FCHSD2	FGL2	GBP1	GBP2	GCH1	GMPR	GPR15	IFI16	IFI35	IFI44	IFI44L	IFI6	IFIT1	IFIT2	IFIT3
IFN_PMBC_4x_Up	ACTA2	APOBEC3B	APOBEC3G	APOL1	BST2	CASP10	CCDC75	CCL7	CCL8	CD38	CEACAM1	CXCL10	CXCL11	CXCL9	CYP2J2	DEFB1	DUSP5	FAS	FASLG	GBP1	GCH1	IFI35	IFI44	IFI44L	IFI6	IFIT1	IFIT2	IFIT3	IFIT5	IGFBP4	IL12RB2	IL15RA	IL18RAP	IL1RN	IL6	INDO	IRF2	IRF7	IRS1	ISG15	ISG20	JAK2	KLF5	LAG3	LAMP3	LBA1	LGALS3BP	LGALS9	LY6E
IL10_OCILy3_Up	ACPP	ADRBK1	AHR	AIM2	ARHGEF6	ARID5B	ATF3	BANK1	BATF	BATF3	BCAR3	BCL3	BCL6	BCL9L	BIC	BIRC2	BIRC3	BMF	C14orf143	CCND3	CD14	CD274	CD36	CDKN1A	CEBPD	CIITA	CISH	CLIP1	CR2	CRADD	CRY1	CXCL13	CXCL9	CXCR5	DDB2	DHRS9	DMD	DUSP1	ELF3	FGF7	FIG4	FKBP15	FLI1	FLT1	FOSL2	FTH1	FUT8	GCA	GLRX
IL6_Ly10_Up_all	BATF	BCL3	BHLHB2	BIRC3	CCL3	CCL3L1	CCL4	CD36	CISH	CXCL9	CXCR5	DUSP2	EGR2	ELF3	FLJ45513	GLRX	GNAQ	GPR183	ID2	IL10	IL2RB	IRF4	JUN	JUNB	KLF10	MMP7	MYC	PTPN1	SGK1	SLC2A5	SLC35A2	SOCS1	SOCS2	SOCS3	TCF12	TRADD	TYRO3	ZBTB20	ZFP36
IL6_Ly10_Up_group1	BATF	BHLHB2	BIRC3	CCL3	CCL3L1	CCL4	CISH	CXCR5	DUSP2	EGR2	ELF3	FLJ45513	ID2	IL10	IRF4	JUN	JUNB	KLF10	MYC	SGK1	SLC35A2	SOCS1	SOCS2	TRADD	ZFP36
IL6_Ly10_Up_group2	CD36	CXCL9	GNAQ	IL2RB	MMP7	PTPN1	TCF12	TYRO3	ZBTB20
IL6_Ly10_Up_group3	BCL3	GLRX	GPR183	SLC2A5	SOCS3
IRF3_target_gene	AANAT	AASS	ADAR	AKAP12	ALDH1B1	ALX3	ARPC5L	ASS1	ATP10A	AXL	AZI2	BICD1	C3	C8orf33	C9orf46	CASP1	CASP3	CASP7	CCDC25	CCDC50	CCL19	CCL5	CCL8	CCRL2	CD86	CDC25A	CEP350	CFB	CHD1	CLIC4	CMPK2	CNTNAP5	CPNE3	CRIM1	CST7	CXCL10	CXCL11	CXCL9	DAXX	DBNL	DCK	DDX4	DHX36	DHX58	DUSP8	EDF1	EFS	EIF2AK2	ELN
IRF4_myeloma_induced_Agilent	ABHD10	ACSS2	AGPAT2	AHCY	ALDH1L2	ALDOC	AMPD1	ANKRD37	ANKZF1	APOBEC3B	APOBEC3D	APOBEC3H	ASB13	ATF3	ATP6V1E2	AVPI1	B3GNT1	BCKDHA	BCL2L2	BHLHB8	BMP6	BSPRY	C11orf24	C14orf93	C16orf14	C17orf39	C1orf2	C22orf9	C5orf32	C9orf100	CALCOCO2	CANX	CAV1	CCDC134	CCDC52	CCDC74B	CCL3	CD97	CDKN1B	CDT1	CFLAR	CHRAC1	CMTM8	CNOT6	CTH	CYP51A1	DDHD2	DENND2C	DIXDC1
IRF4_myeloma_induced_Lymphochip	ACP1	ADAM9	ATF4	ATP5D	ATRX	AURKA	AXIN1	BCL2	BMI1	BMP6	BNIP2	C12orf57	CASP3	CCNC	CCPG1	CD38	CDK6	CEBPZ	CENPF	CTR9	CYCS	CYP51A1	DDIT3	DDR2	DEPDC1	DKFZp547E087	DNAJB9	DNAJC10	DUSP5	E2F5	EIF2S2	EIF3E	ELL2	ELN	FADS1	FAR1	FRMD6	FYN	GARS	GLS	GNG10	GOLGA7	GRSF1	HMGB1	HMGCR	HMMR	HSP90AA1	HSP90B1	IDH1
IRF4_myeloma_induced_all	ABHD10	ACP1	ACSS2	ADAM9	AGPAT2	AHCY	ALDH1L2	ALDOC	AMPD1	ANKRD37	ANKZF1	APOBEC3B	APOBEC3D	APOBEC3H	ASB13	ATF3	ATF4	ATP5D	ATP6V1E2	ATRX	AURKA	AVPI1	AXIN1	B3GNT1	BCKDHA	BCL2	BCL2L2	BHLHB8	BMI1	BMP6	BNIP2	BSPRY	C11orf24	C12orf57	C14orf93	C16orf14	C17orf39	C1orf2	C22orf9	C5orf32	C9orf100	CALCOCO2	CANX	CASP3	CAV1	CCDC134	CCDC52	CCDC74B	CCL3
IRF4_myeloma_induced_direct	AMPD1	B3GNT1	C11orf24	CANX	CASP3	CCNC	CDK6	CDKN1B	CFLAR	DDR2	DENND2C	DUSP5	E2F5	ELL2	FBXO16	GFPT1	IRF4	ISG20	ITGB7	MAN2A1	MYC	NFIL3	P4HA1	PAM	PHKA1	PIM2	PRDM1	SCD	SLAMF7	SLC37A4	SQLE	STAG2	SUB1	TNFAIP3	TNFRSF17	TUFT1	UAP1
Immediate_early	DUSP1	EGR1	FOS	FOSB	JUN	JUNB	KLF6	SNF1LK	ZFP36
Immunoglobulin_Node2868	CKAP2	IGHG1	IGJ	IGKC	IGKV1D-13	IGL@	IGLL3	IVD	LOC100130100	LOC100133862	LOC652494	LOC91316	NTN2L
JAK_IL10_Ly10_Up	AIM2	BATF	BCL3	BIC	BIRC3	C14orf143	CD14	CD36	CLIP1	CXCL9	DHRS9	ELF3	FGF7	FUT8	GNG10	GPR183	HES1	ID2	IFITM2	IL2RB	JUN	JUNB	KLHL6	LILRB1	LTBR	MARCH1	MCL1	MNDA	PARP9	PHLDA1	PRDM1	PTPN2	SAMSN1	SOCS2	ST6GAL1	STAT3	TP53BP2	TRIM22	ZFP36
KLF2_induced	ARHGEF10	ARHGEF18	ATP6V0D1	BCL7A	BIN1	C15orf39	CACNA1H	CALM1	CAPG	CASP10	CASP8	CCND2	CD47	CD52	CD53	CDC25B	CDKN2D	CHST6	CRBN	CREBBP	CRIP1	CX3CR1	CXCR3	DOK2	ELF4	ELN	EMP3	FAM53B	FAM62A	FAM65B	FAM89B	FBLN2	FHL2	FLNA	FMNL1	GARNL4	GLG1	GNS	GPR56	GZMA	H2AFV	HLA-A	HLA-B	HLA-E	HLA-F	HLA-G	HMHA1	ID3	IL10RA
KLF2_repressed	ABCB7	ABCG1	ACAT1	ACCN2	ACTN1	AEBP1	ALDH1A2	APRT	BAG2	BATF3	BCL7B	BLVRA	C13orf15	C13orf18	C16orf58	C18orf1	C7orf44	C7orf64	CD1A	CD1B	CD1C	CD1E	CD40LG	CEP70	CHI3L2	CHPT1	CHST11	CLPB	CMAH	CTNNAL1	DARS	DBNDD2	DCTD	DECR2	DHCR7	DNTT	EFEMP1	EGR1	EPHX2	EXOSC4	FAH	FAM46C	FBXO9	FDFT1	FHL1	FLOT1	FXYD2	GART	GLRX2
KRAS_Down	ALDH3A1	APP	ARL4C	ATP6V1B2	BEX1	BYSL	C16orf53	CALU	CC2D1A	CEACAM6	CHIT1	CRISP1	CTSL1	CXCL5	CXorf1	DKK1	DUSP4	EBNA1BP2	EIF5	ENTPD6	EPB42	EPHB3	ETV5	F2RL1	FOSL1	GPD1	H2AFY	H3F3B	HMGA2	IGF2AS	INHBB	IRS2	KRAS	LBR	LRP8	MALL	MLX	MRPS12	NUP62CL	ODC1	PARD6A	PARD6B	PDE4C	PDZD3	PHLDA1	POLR3K	PPP1R3A	PRMT5	PTMA
KRAS_Up	ACVR1B	ADAM19	ADCY7	ATP2B4	BHLHB2	BMP1	C1S	C8orf4	CADM1	CALD1	CCDC53	CCL2	CDH4	CHST3	CLDN4	COL1A1	COL4A1	COL4A2	COL5A1	COL7A1	CXCR7	DFNA5	DICER1	DKK3	DNAJB2	ECE1	EPHB2	EVL	FERMT2	FLRT2	GABARAPL1	GADD45B	GLIPR1	GOLGA8F	GPR56	HGD	HSPB1	HSPG2	IGFBP3	IGFBP7	INPP4B	ITGAV	JAK1	JUN	JUNB	LAMP2	LBH	MAP3K8	MATN2
Leucine_starve_down	ACAT2	ACOT7	ADRM1	AHSA1	ALDOA	ALG8	AMD1	ARID4B	ARMET	AURKA	BRD2	BST2	BYSL	C11orf9	CAD	CALR	CCNA2	CCNB1	CCT2	CCT4	CCT5	CCT6A	CDC20	CDK2AP2	CEBPZ	CNGB1	COPB2	COPS2	CSE1L	CTSC	CYC1	CYCS	DDX1	DDX21	DHCR24	DHRS1	DHX9	DNAJA1	DNAJB6	DNAJC11	DYNLL1	DYRK1A	EBP	EI24	EIF2B4	EIF4G1	EIF4G2	EIF5	EMD
Leucine_starve_up	AARS	AIM1	ALDH2	ALPK3	APBB3	APOBEC3G	ARID3A	ASNS	ASS1	ATF4	ATF5	ATXN2L	BACH1	BCL7A	BMI1	BMP1	BMP7	BNIP3L	BTG2	BUD31	C20orf117	CAMK1	CARS	CCDC28A	CD22	CD27	CD6	CDKN1A	CEBPB	CIRBP	CKB	CLCN6	CLIC4	CPNE5	CSNK1G2	CTAGE5	CUX1	CYB561D2	CYTH1	DAAM1	DDX46	DECR1	EIF1	ERCC2	FCER2	GBF1	GCDH	GCHFR	GPLD1
Lipid_enzyme_Node3152	ACACA	DHCR24	DHCR7	FADS1	HMGCR	HMGCS1	SC4MOL	SCD
Liver_fetal_lung_Node1634	AGXT	AHSG	ALB	ALDOB	AMBP	APOA1	APOA2	APOB	APOC2	APOC3	APOH	CPS1	F2	FABP1	FGA	FGB	FGG	HMGCS2	HPD	HPX	ITIH1	ITIH2	ITIH4	LBP	LIPC	MAT1A	ORM1	ORM2	PLG	SERPINC1	TM4SF4	VTN
Lung_Node3969	CASKIN2	CLDN18	EDN1	ELN	GPR116	MUC1	RAMP2	RP11-589B3.4	SCGB1A1	SFTPB	SFTPC	SFTPD	SLC34A2	TBX2	TMEM100
Lymph_node_DLBCL	A2M	ACP5	ACTN1	ADAMTSL4	ADH6	AIF1	ALDH1A1	ASAH1	B2M	BTN3A2	C3AR1	CASP1	CASP4	CCL18	CCL2	CCL5	CCM2	CCR1	CCR5	CD14	CD33	CD4	CD63	CD68	CD81	CD97	CEBPB	CHKA	COL15A1	COL3A1	COL4A2	COL6A1	CREG1	CSF1	CSF1R	CSF2RB	CSF3R	CST3	CTGF	CTSA	CTSB	CTSL1	CTSS	CXCL10	CXCL9	CXCR6	CYBB	CYP1B1	CYP27A1
Lymph_node_DLBCL_survival	ACTN1	COL3A1	CTGF	FAM38A	FN1	PLAU
MCL_gt_SLL_DLBCL	ALOX5	BANK1	CCDC50	CD1D	CD24	CEACAM1	CHL1	EPHB6	FAM83G	FCRL1	FCRL2	GNG11	GPR18	GRAP	IGFBP3	KLRC4	LY86	MARCKS	MFHAS1	MMP11	MS4A1	RNGTT	SP100	TLR10	WNT3	ZMYM2
MCL_proliferation_survival	ASPM	CDC2	CDC20	CDKN3	CENPF	HMGB2	HPRT1	MCM2	NEIL3	PCNA	PIF1	POLE2	RAN	TK1	TOP2A	TUBA1B	UHRF1
MHC_classII_DLBCL	CD74	HLA-DMB	HLA-DPA1	HLA-DPB1	HLA-DQA1	HLA-DQB1	HLA-DRA	HLA-DRB1
MHC_classII_DLBCL_survival	HLA-DPA1	HLA-DQA1	HLA-DRA	HLA-DRB1
MHC_classII_Node528	CD74	HLA-DMA	HLA-DPA1	HLA-DPB1	HLA-DQB1	HLA-DRA	HLA-DRB1	HLA-DRB4	LOC731682
MHC_classI_Node591	HLA-A	HLA-B	HLA-C	HLA-E	HLA-F	HLA-G	HLA-H	LOC730410
Metallothionein_Node595	MT1E	MT1F	MT1G	MT1H	MT1P2	MT1X	MT2A
Monocyte_4x_U133plus	ABCC3	ADAM9	AGPAT9	ALCAM	ALDH3B1	ANKRD57	ANPEP	APOBEC3A	AQP9	ARHGEF10L	ARHGEF11	ARRDC4	ASPH	ATF3	ATF5	ATG7	ATP13A3	B3GNT5	BCAT1	BST1	C13orf31	C15orf48	C19orf59	C3	C3AR1	C4orf18	C5AR1	CCL7	CCRL2	CD14	CD163	CD36	CD68	CD93	CDC42EP2	CENTA2	CENTG3	CES1	CFB	CFD	CFP	CKAP4	CLEC12A	CLEC4E	CLEC5A	CLEC7A	CLIC2	CPVL	CREG1
Monocyte_8x_U133plus	ANPEP	APOBEC3A	AQP9	ASPH	ATP13A3	C15orf48	C4orf18	C5AR1	CCL7	CCRL2	CD14	CD163	CD36	CD68	CDC42EP2	CES1	CFD	CFP	CLEC4E	CLEC5A	CLEC7A	CPVL	CSF1R	CSF2RA	CSTA	CXCL16	CXCL2	CYP1B1	CYP27A1	DMXL2	DOCK4	ELOVL7	EMR2	EREG	ETS2	FCAR	FCN1	FFAR2	FPR1	FPR2	FXYD6	G0S2	GPR109B	HCK	HK3	HNMT	HOMER3	IFIT2	IGSF6
Muscle_Node1645	ACTA1	ACTN2	ATP2A1	CKM	COX6A2	CSRP3	MB	MYH2	MYH7	MYL1	MYL2	MYLPF	MYOZ1	MYOZ2	NEB	SLN	TCAP	TNNC1	TNNI1	TNNI2	TNNT1	TPM1	TPM2	TTN
Muscle_Node2235	ACTG2	CNN1	DES	LMOD1	MYH11	PLN
Myc_ChIP_PET_2plus	A1CF	A2BP1	AAK1	AASDH	ABAT	ABCA3	ABCB9	ABCC3	ABCC4	ABCD3	ABCG5	ABHD11	ABI3BP	ABL1	ABLIM1	ABLIM2	ABR	ABRA	ABT1	ABTB2	ACACA	ACADM	ACAT1	ACBD6	ACCN1	ACE	ACN9	ACO1	ACOT7	ACOXL	ACP1	ACR	ACSS1	ACTBL3	ACTG2	ACTL8	ACTN1	ACTN4	ACTR5	ACTRT2	ACVR1C	ACVR2B	ACYP2	ADAM12	ADAM15	ADAM28	ADAM29	ADAMTS12	ADAMTS17
Myc_ChIP_PET_3plus	A2BP1	AAK1	ABCC4	ABR	ABT1	ACYP2	ADAM29	AKAP2	ALDH3B1	ALOX15B	AMPD1	ANAPC5	ANKRD16	ANKRD46	ANKS6	ANLN	ANP32B	AP3B1	ARHGEF18	ARL4C	ASTN2	ASXL3	ATP1A1	ATP2A2	ATP5D	ATP6V1E1	ATXN7L2	AUH	B4GALT1	BAHD1	BCL11A	BCL2	BCL7A	BCL7C	BCR	BDKRB2	BICD2	BMI1	BRD2	BRI3BP	BUB1	C12orf67	C13orf36	C14orf132	C14orf159	C15orf2	C17orf81	C18orf45	C20orf106
Myc_ChIP_PET_Expr_Down	ACE	ACSS1	ADRBK2	AKAP11	AKAP13	ALOX5	ANKDD1A	ANKRD13D	APBB1IP	APOL3	ARHGEF11	ARHGEF7	ARL4C	ARPC1B	ARRDC3	ASPHD2	ATG16L2	ATP2B4	ATP8A1	ATP8B1	AXUD1	B3GNT1	B4GALT1	BASP1	BCL2	BCL2A1	BCL3	BHLHB3	BLK	BNIP3L	BTG1	C14orf159	C19orf66	C7orf60	CABIN1	CALCOCO1	CALM2	CAMK1D	CAPG	CASP1	CBFA2T2	CBFA2T3	CCDC128	CCDC91	CCDC92	CCM2	CD44	CD47	CD97
Myc_ChIP_PET_Expr_Up	ABCD3	ABLIM1	ACACA	ACAT1	ACBD6	ACN9	ACOT7	ACP1	ACTN1	ADCK2	ADCY3	ADSL	AGBL5	AGPS	AK2	AK3	AKAP1	AMMECR1	AMN	ANAPC5	ANP32B	APEH	APP	APRT	ARHGAP6	ARIH2	ARL5A	ARL6IP6	ARPC5L	ASNS	ASS1	ATP1A1	ATP2A2	ATP5D	ATPBD4	BAG1	BCLAF1	BICD2	BMP7	BNIP3	BUB1	BUB1B	BUB3	C10orf119	C12orf30	C12orf52	C12orf66	C13orf3	C14orf104
Myc_RNAi_OCILy3	ADSL	ADSS	AKAP10	BAG1	CD164	CDC123	CDK4	CSTF3	CYCS	CYP2B6	DEPDC1	DHX15	DLEU1	DNAJC2	EIF3B	EIF4G1	ENO1	ETNK1	FBL	FBXO45	GLS	GMPS	GNL3	GSPT1	HMGB1	HSP90B1	HSPA9	IMPDH2	MFSD8	MNAT1	NOL1	NOL5A	NOLC1	NPM1	NPM3	PHB2	POLD2	PSME3	PUF60	ROCK1	SCARB1	SKIV2L2	SLC38A2	SNW1	SRP72	SRPK1	ST13	TFAM	THOP1
Myc_overexpression_1.5x_up	AGPAT5	ALG3	ATIC	BID	BOP1	C10orf2	C12orf66	C16orf14	C19orf48	C1orf107	C1orf51	C20orf27	CCDC78	CCDC86	CDK4	CIRH1A	DDX10	DDX28	DKC1	DUSP2	ECE2	EXOSC5	FAM100A	FAM86B1	FARSA	FARSB	FLAD1	FLJ10661	GEMIN5	GNL3	GPATCH4	GPD1L	HK2	HS6ST2	HSPA1A	HSPA6	HSPC111	HSPD1	IPO4	JTV1	LSG1	METTL1	MON1A	MRTO4	MYBBP1A	MYC	NCL	NLE1	NOL5A
Myc_overexpression_2x_down	AKAP12	ARNTL	CDK2	DDAH2	GPRC5A	HIST1H2AC	NTF4	OSBP2	PC	PLAU	PLEKHG2	RPL39	SERPINB1	TGM1	TMEM49	TUBA1A	YPEL3	ZBED2
Myc_overexpression_2x_up	AGPAT5	C10orf2	C12orf66	C19orf48	CCDC78	DDX28	DKC1	DUSP2	ECE2	EXOSC5	FAM86B1	FARSB	FLJ10661	GEMIN5	GPD1L	HK2	HS6ST2	HSPA1A	HSPA6	MYBBP1A	MYC	NCL	NOL5A	PLD6	RPP40	RRP9	SLC19A1	SLC6A15	SLC6A8	TAF4B	TMEM97	TRMT1	UBIAD1	UTP14A
Myeloid_Node1536	AIF1	CFP	CYBB	FCN1	HCK	HK3	ITGB2	LILRB1	LILRB2	LILRB3	LST1	MNDA	NCF2	RNASE6	SPI1	STX11	TLR2	TLR8	TYROBP
Myeloid_Node2894	AQP9	C5AR1	CD14	CD163	CSF1R	CSF3R	FLJ22662	FPR1	MS4A6A	S100A12	TREM1
Myeloid_progenitor_Node3051	AZU1	CLC	ELA2	MPO	RNASE2	RNASE3
Myeloma_CD-1_subgroup_down	ABHD6	ADAM19	ATP6AP1	BCL2L1	BHLHB3	C1orf115	CCDC125	CD46	CD59	CLIC2	CMTM4	CNTN4	CPEB4	CPNE5	CXXC5	DOK3	ECHDC2	F11R	FAM63B	FLI1	FUT8	GATM	GRAMD3	HES1	ITPR3	KIAA0040	LAX1	LOC100131819	NOTCH2NL	PRKCD	PRKD3	RAB3B	RAB3IP	SCAMP5	SLFN11	SMURF1	SNF1LK	SPINT1	ST6GAL1	STARD5	TNS3	TRAM2	UCP2	UGCG	UNC93B1
Myeloma_CD-1_subgroup_up	ADRB1	ALPK2	ASB2	ATF5	BATF3	BGLAP	CEBPB	CLEC2D	CSTA	CTH	EIF4EBP1	ERN1	FYN	G0S2	GPR63	GPT2	HADH	INHBE	ITGAL	KLHL4	LOC100131096	MFAP4	MTG1	NID2	NSUN7	PCDH20	PCK2	PHGDH	PTGER2	RAB31	RAB33A	RBP1	RGAG4	SESN2	SLC7A11	STC2	SYTL1	TBC1D16	TM6SF1	TMC6	TMC8	TOX2	TRIB3	TXNDC13	VPS37A
Myeloma_CD-2_subgroup_down	ANXA2	AVEN	BOP1	BZW2	C1orf53	C3orf59	CHAC2	CR2	FABP5	FAM171A1	FASN	GJB2	GPR37	GPRC5D	HIST1H1C	HK2	HMGA1	HN1	HRASLS3	JAK3	KTELC1	LATS2	LDHA	MCC	MFNG	MREG	MRPS30	MSRB3	NEDD4	NFIA	OSBPL3	PAQR6	PFKFB2	POLR2H	POLR3G	PPA1	PRICKLE2	RRAGD	SORD	TDO2	THEM4	TXN	TXNDC11	UCK2	USP45	ZNF593
Myeloma_CD-2_subgroup_up	ADSSL1	APLP2	B3GALNT1	C1orf165	C2orf24	CD27	CD79A	CLLU1	CNR1	DHTKD1	DTX1	DYRK2	FCRLB	ITPKB	LAMA2	LOC100134371	LOC338758	MARCKS	METRNL	MS4A1	NAGK	NF1	PDZRN4	PHLPPL	PIK3AP1	PLXNB2	PNOC	PPAP2B	PRDM5	PTPRJ	RCBTB2	RERE	RGS13	RNGTT	SDC2	SLC8A1	SORT1	SPAG4	SRC	TGIF1	TNFSF8	TRAF5	VPREB3	ZNF395	ZNF608
Myeloma_HY_subgroup_down	AGA	AP1S2	APBB1IP	C18orf10	C6orf129	CALHM2	CD52	CD86	CKS1B	CST3	DEK	DEPDC6	DNAJC12	DOCK11	DPM3	EIF4EBP2	FAM59A	GBA	IL27RA	IRF2BP2	KCNN3	LHPP	LOC286167	MSTO1	MYO1B	NANOS1	NES	NTAN1	OPN3	PDIA6	PKIA	PLP2	PRSS16	RAPH1	RBMS1	S100A4	SGPL1	TAGLN2	TBCE	TCFL5	TEGT	TIMP1	TMEM107	TP53BP2	TSEN15	WARS
Myeloma_HY_subgroup_up	AMIGO2	ATP5L	C11orf2	C20orf199	C5orf26	CCDC85A	CCRL2	CDV3	CNTN5	CSNK1G3	DDX58	ELOVL7	EPHB1	F2R	FCHSD2	FLI1	FRZB	GBA3	GLTSCR2	GNG11	GTF2F2	IPO7	ISL2	KIAA0141	LAG3	LAMP3	LOC129293	LOC727797	LOC728769	LOC729926	OAS2	PAK1	PIP5K1B	POLR1D	RBM4B	RC3H2	RPL13A	RPL37	RSAD2	SCAPER	SCYL2	SEMA4D	SIDT1	SNHG1	SNHG7	THG1L	TNFSF10	XRCC4
Myeloma_LB_subgroup_down	AKNA	BASP1	CAP1	CASP4	CCR2	CKLF	DDX60	DIRAS2	DUSP6	ENAM	FAM70A	FAM91A2	GTPBP1	HIF1A	HIST1H3D	IFI27	IFI35	IFI6	IFIT5	IRF1	LOC643733	LOC727820	LOC730256	LY6E	LYSMD2	MAN1C1	MX2	PARP8	PDE4DIP	PSMB10	PTPRCAP	RSAD2	RTP4	SEPHS1	SMAD1	STAT1	STAT2	TACC1	TRAF5	USP18	WIPF1	XAF1	ZC3H12C	ZMIZ1	ZNF818P
Myeloma_LB_subgroup_up	ARD1B	ARID5B	ARNT2	BIK	BOC	C19orf36	C6orf105	CACNB3	CGREF1	COL9A2	COPZ2	CSF2RB	CTTN	CYBRD1	EDN1	FLJ13137	FLNB	HES5	KCNJ11	KIAA0895	LOC283454	LOC338620	LYPD6B	MAP4K3	MAST4	MBD2	NAMPT	NTHL1	P2RX5	PARP15	PCGF5	PHACTR3	PLEKHA7	PLS1	PLXNA1	PPP1R14A	RASGRP1	RELL1	SAMD3	SLC39A6	SMAP2	SRGAP2P1	USP53
Myeloma_MF_subgroup_down	AIG1	ALDH2	AMIGO2	ARMC2	BRSK1	C12orf59	C13orf15	CAMK1D	CBLN1	CCDC110	CHST11	CREB3L2	DKK1	DOCK9	ENAH	ESRRG	FAM3C	GLCCI1	GPLD1	ITSN1	KLHDC5	LBA1	LOC100130360	LOC145842	LOC283070	LOC730272	MGC26718	MOBKL1A	MOXD1	MTDH	NRG3	PDZRN4	PRKCA	PTCH1	RAD17	RAPGEF2	SCAPER	SEC62	SLC12A8	SLC22A15	STRBP	STXBP6	SYNGR1	TMEM170B	TNFAIP8	ZNF275
Myeloma_MF_subgroup_up	ABHD12	ABLIM1	AGMAT	APOBEC3A	ARHGAP6	ARID5A	ARPC1B	ATP13A2	C20orf39	CCDC86	CD109	CDH1	CEBPD	COTL1	CX3CR1	CXCL12	DEFB4	DFNB31	DOCK4	DPYSL2	FAM174B	FAM70A	GPM6B	GREB1	ITGB7	LCP2	LOC151162	LOC643201	MCTP1	MFAP2	NMU	NTRK2	NUAK1	PEBP1	PRSS7	PYGB	RASSF4	RNASE6	SFRP2	SHMT1	SLC25A20	SMARCA1	SPP1	TLR4	TMEM37	TRIM47	TUBB2B	TYMP
Myeloma_MS_subgroup_down	ANKRD49	APOL1	ARHGEF12	ARSG	C11orf73	C7orf41	CHD2	CHD7	CLTA	DHPS	DPP7	FAM133A	FLJ32810	GPX1	ICAM4	ISL2	JOSD3	KIAA1704	KIAA1826	LETMD1	LOC645212	MAGEC1	MOBKL2A	MRPS31	NAPRT1	NMRAL1	NPAT	OAS3	PIF1	POLR1D	PRDM5	RHOBTB3	RPS2	SEPT9	SLC16A6	SLC35D2	SLC35F2	SPIN3	STK24	TKT	TLR10	TMEM123	TMEM126A	TMEM133	ZBTB26
Myeloma_MS_subgroup_up	BACE2	C10orf30	CENTG2	CLEC11A	CLGN	CLIC6	CST3	DSEL	DSG2	DTNA	FAM171A1	FGFR3	FZD2	FZD8	JAM3	KLHL13	LARP6	LRP12	MAGI1	MARK1	MITF	MYO10	MYRIP	NAP1L3	NGFRAP1	NRIP1	PALLD	PBX1	PCSK5	PPM1H	RAI2	RMST	RNF32	RUNDC3B	SERPINE2	SLC22A17	SPRY2	TCEAL2	TEAD1	TMEM176A	TMEM176B	TRIM58	VWA5A	WHSC1	WWC2	ZNF503	ZNF521
Myeloma_PR_subgroup_down	ALCAM	ANKRD44	ARHGAP18	ARID5B	BAZ2B	BCL10	BLNK	CBX7	CNTN1	CYLD	DDHD2	DPYD	DUSP26	EPS15	FGD4	FGF2	FLJ25076	GAB1	INADL	JMJD1C	KAT2B	MAP2	MEI1	MOBKL2C	NLK	NR3C2	PAXIP1	PCDHGC3	PHF1	PPAPDC1B	PRDM2	PWWP2B	RASGRP3	RGPD5	RSBN1	SATB1	SH3GLB1	SLC7A7	SMAP2	SOCS1	SYNE2	TBC1D10C	TFEB	TK2	TMEM167B	ZBTB20	ZHX2
Myeloma_PR_subgroup_up	ASPM	AURKA	BIRC5	BRP44	BUB1B	C18orf24	CCDC34	CCNB1	CCNB2	CDC2	CENPL	DEPDC1B	DLGAP5	DSCC1	E2F8	EZH2	FANCI	FOXM1	GAGE12F	GAGE12I	GAGE6	GAGE7	GCUD2	KIAA0101	KIF14	KPNA2	MAGEA1	MAGEA3	MCM10	NEK2	NUF2	NUSAP1	PRC1	RACGAP1	RFC4	RRM2	SLC19A1	SPC24	SPC25	TOP2A	TPX2	TRIP13	TSR1	TTK	TYMS	UBE2C	UBE2T	ZWILCH
Myeloma_TACI_high_bone_marrow_plasma_cell_gene	AKAP7	AKR1C1	AMN	APOC2	AZGP1	B4GALT1	BIRC7	C10orf11	C1QL1	C1orf61	C1orf63	C3AR1	C3orf37	CAPS	CCDC151	CDKN1C	COL11A2	CTRB2	CXCL1	DAO	DDIT3	DDR1	DSP	DUSP1	EPB49	EPHB4	EPHB6	FIP1L1	FLJ12355	FMOD	GABBR1	GCOM1	GGTA1	GIT1	GNA11	GNAQ	GSTA4	HNRPDL	HRK	HS3ST2	HYI	KCNH2	KHSRP	KIAA0284	LMNA	LOC284454	MAML3	MAMLD1	MAN1C1
Myeloma_TACI_low_plasmablast_gene	AASDHPPT	ASF1A	BARD1	C10orf137	C17orf42	C1QBP	C1orf131	C7orf30	CBWD6	CCDC5	CCT2	CCT5	CDC2	CDC23	CEP152	CHCHD1	CHEK1	CHMP4A	CIRH1A	CMC1	CYP2R1	DDX1	DKC1	EBNA1BP2	EFTUD2	EIF3G	EZH2	FAM98B	FIBP	G3BP1	GPR89A	IARS	IHPK2	IK	IREB2	JTV1	KEAP1	KIAA1731	KLF13	LAP3	LSM4	LSM5	MCM2	MRPL43	MRPS12	NASP	NCAPD3	NDUFA13	NMT1
NFKB_K1106	BCL2A1	BIC	CCL22	CCL5	CD44	CD83	CR2	DUSP2	ICAM1	LTA	NFKB1	NFKBIA	RFTN1	SPI1	SRP72	TNF	TRAF1
NFkB_OCILy10_only	CCDC76	CCL3	CCL4	CCND2	CFLAR	FKBP15	HEATR1	IL10	LOC154761	LYN	MMP7	MX1	PLEK	RGS1	SAMD9L	SELL	STAT1	ZNF335
NFkB_OCILy3_only	AHR	CXCL13	GPR183	IL12B	IL6	IRF1	JUNB	LITAF	SOCS2	ZFP36L1
NFkB_all_OCILy3_Ly10	AHR	BATF	BCL2A1	BCL2L1	BIC	BIRC3	CCDC76	CCL22	CCL3	CCL4	CCND2	CCR7	CD40	CD44	CD83	CEP110	CFLAR	CXCL10	CXCL13	CXCL9	DUSP2	EBI3	ELL2	FAM65B	FKBP15	GADD45B	GPR183	HEATR1	ICAM1	ID2	IL10	IL12B	IL6	INSIG1	IRF1	IRF4	JUNB	LITAF	LOC154761	LOC283663	LTA	LYN	MARCKS	MMP7	MX1	NAMPT	NCF2	NCL	NFKB1
NFkB_bothOCILy3andLy10	BATF	BCL2A1	BCL2L1	BIC	BIRC3	CCL22	CCR7	CD40	CD44	CD83	CEP110	CXCL10	CXCL9	DUSP2	EBI3	ELL2	FAM65B	GADD45B	ICAM1	ID2	INSIG1	IRF4	LOC283663	LTA	MARCKS	NAMPT	NCF2	NCL	NFKB1	NFKB2	NFKBIA	NFKBIE	PIM1	RASGRP1	RELB	SMARCA2	TNF	TNFAIP3	TRAF1
NK_U133plus	AP2A1	B3GAT1	C13orf33	C1orf187	CD300A	CHSY3	CTSW	DGKZ	EGFR	FCGR3B	HIVEP3	IGFBP7	KIR2DL1	KIR2DL2	KIR2DL3	KIR2DL4	KIR2DL5A	KIR2DS1	KIR2DS2	KIR2DS3	KIR2DS4	KIR2DS5	KIR3DL1	KIR3DL2	KIR3DL3	KIR3DS1	KIR3DX1	LIM2	LINGO2	MCTP2	MGC52282	MMP25	NCAM1	PRF1	TTBK2
Normal_mesenchymal-1_Node1643	ACTA2	ADAMTS1	AQP1	BGN	C10orf10	C1R	C1S	CALD1	CAV1	CAV2	COL1A1	COL1A2	COL3A1	COL4A1	COL4A2	COL5A1	COL5A2	COL6A1	COL6A2	COL6A3	CTGF	CXCL12	CYR61	DCN	EFEMP2	EHD2	EMP2	FBLN1	FBN1	FKBP9	FN1	FSTL1	GAS1	GNG12	GPNMB	GPX3	HSPG2	IGFBP4	IGFBP5	IGFBP6	IL1R1	ISLR	JAG1	KANK2	LAMA2	LAMA4	LAMB1	LAMC1	LRRC32
Normal_mesenchymal-2_Node1615	FBN1	LOXL1	MFAP2	MFAP5	MMP14	PXDN	SERPINE1	SERPINH1	TFPI2	THBS1
Notch_T-ALL_down_Palomero	CALM2	CDKN1B	COX7C	EDEM1	FAM117A	FIG4	GM2A	HIST1H2AK	JARID2	KIAA0391	NDRG1	SPCS2	TMEM59	ZWINT
Notch_T-ALL_down_Sharma	CADM1	CCNG2	CCR9	CD200	CD47	CD52	CD8B	CPEB2	CTSL2	FBXL12	GLCCI1	IFNGR1	LGALS1	LZTFL1	RAPGEF4	RORC	STK3	TCTEX1D1
Notch_T-ALL_down_Weng	C21orf66	C3orf58	CD247	DOK2	DUSP2	DUSP6	GADD45A	GATA3	GEM	IKZF1	ITK	KCTD12	LAPTM5	LASP1	PRKD2	PSTPIP1	SOX13	TES
Notch_T-ALL_up_Palomero	AARSD1	AHSA1	C16orf13	C21orf59	CSDA	DDX28	DDX56	EMG1	FYCO1	GSPT1	HDAC4	HES1	HSPC111	IFRD2	ITPR2	KARS	KPNB1	MRPL24	MRPL4	MRTO4	MTMR4	MYC	NAT10	NOL5A	PDSS1	PHB	PMM2	POLR1A	POLR2I	POLR3E	PPAT	PWP1	SERBP1	SF3B3	SHQ1	SLC25A19	SNHG12	SNX5	SRPRB	TASP1	TIMM13	TRHDE	TRUB2	UMPS	UTP14A	WDR12	WDR46
Notch_T-ALL_up_Sharma	ACE	ARHGEF10L	BCAT1	CA12	CAD	CD82	CEPT1	CNTNAP2	CTNND2	DENND2D	DSP	DTX1	EGR1	GNL3	GRWD1	HES1	HEYL	HK2	HRB	IFI16	IL22	IL2RA	LOC644192	MDN1	METTL1	MYBBP1A	MYC	MYL4	NOL1	NOTCH1	NOTCH3	PPAN	PTCRA	RRS1	SHMT1	SRM
Notch_T-ALL_up_Weng	AHCY	B2M	CD3G	CD82	CDV3	CNBP	COPS6	CSDA	CTAGE5	DTX1	EIF4B	FABP5	FAM152B	FKBP5	GYG1	HES1	HEY1	HRB	ID2	IFI16	IGF2BP2	IGFBP6	IMPDH2	ISG15	LARS	LDHA	MTF2	MYC	NOTCH1	NOTCH3	PDGFRB	PFKL	PGK1	PKP4	PLA2G12A	POLD1	PRIM2	PRMT1	PTCRA	PTGES3	PTP4A3	PTPN22	RPL13A	RRM1	RSL1D1	SSRP1	TK1	TKT	TMEM131
Notch_T-ALL_up_concensus	CD82	DTX1	HES1	HEY1	HEYL	HRB	IFI16	IL2RA	LOC644192	MYC	NOTCH1	NOTCH3	PTCRA
OCAB_up	B4GALT1	CCND3	CDC37	KCNN4	LCK	S100A10
PAX5_repressed	ACADM	ADAMTS10	C13orf15	C14orf105	CAPN5	CCL3L1	CCR2	CD28	CD47	CMTM7	CST7	DGKD	DHRS3	DLX1	DUSP5	ELN	EMB	EMP1	FCER1G	FLT3	FUT8	FXYD5	GLT8D1	GPR97	GRAP2	GRIA2	H1F0	IFITM1	IGF2	IGJ	IL17RA	ITGAL	KCNN4	LCK	LEPROTL1	LILRB1	LMO2	LSP1	LY6D	M6PRBP1	MEF2C	MYL4	MYLC2PL	NCF4	NOTCH1	NUDT14	PARP1	PPP1R1C	PPP3CA
PGC-1alpha_overepxression_up	ATP5J	ATP5L	ATP5O	COX5B	COX6A2	COX7A1	COX7B	COX7C	CYC1	CYCS	NDUFA13	NDUFA2	NDUFA5	NDUFA7	NDUFA8	NDUFB3	NDUFB5	NDUFB6	NDUFC1	NDUFS2	NDUFS3	NDUFS5	SDHA	SDHB	UCRC	UQCRB	UQCRC1
PMBL_HL_high	ACTN1	AIM2	ARID5B	BATF3	CCL17	CCL5	CD200	CD58	CD59	CD97	CDKN1A	CSF1	CX3CL1	CYLD	DENND3	DENND4A	FAS	FBN1	FERMT2	FGFR1	GBP1	GOLM1	HOMER2	ICAM1	IER3	IFI35	IFI6	IFIT2	IL13RA1	IL15	IL2RG	IRF1	JAK2	JHDM1D	JUNB	LAMC1	LY6E	LY75	MAL	MSC	NCOA1	NCOA2	NFKB2	NFKBIA	NUP62	OAS3	PARP10	PDCD1LG2	PGRMC1
PMBLhigh_HLlow	ADA	CYBB	EVI2B	IL17RB	LMO2	TNFRSF17	TNFSF4
Pan_B_U133plus	ABCB4	ADAM28	AFF3	ALOX5	APBB2	BANK1	BCL11A	BCL7A	BLK	BLNK	C13orf18	C9orf45	CBFA2T3	CCDC4	CD19	CD1C	CD22	CD24	CD72	CD79A	CD79B	CIITA	CLCN4	CLLU1	COBLL1	COCH	COL9A3	CR2	CXCR5	DENND5B	DKFZP564O0823	DTX1	E2F5	EBF1	ELL3	FAM129C	FAM30A	FCER2	FCRL1	FCRL2	FCRL5	FCRLA	GATM	GNG7	HHEX	HVCN1	IL28RA	KBTBD8	KIAA0125
Pancreas_Node1629	CEL	CLPS	CPA1	CPB1	CTRB1	CTRB2	CTRC	ELA2A	ELA3A	ELA3B	GCG	GP2	INS	LOC100134294	PLA2G1B	PNLIP	PNLIPRP2	PRSS1	PRSS2	PRSS3	REG1A	REG1B	REG3A	SPINK1
Pituitary_lung_Node1582	CGA	CSH1	CSH2	CSHL1	GH1	GH2
Placenta_Node1337	ADAM12	ALPP	PSG1	PSG3	PSG9
Plasma_cell_gt_mature_Bcell	ABCG2	ARF3	CASP10	CCL3	CD38	CD59	CFLAR	COX15	CXCL2	CYP2E1	CYP51A1	ETV5	GFI1	GLA	GOLGB1	GPR109B	HCST	IER3	INSR	ITGA6	MGC29506	MMP9	OS9	PDIA5	PRDM1	PRDX4	RGS1	RRAGD	SDC1	SELPLG	SLAMF7	SLC1A4	SSR3	TIMP1	TNFAIP3	UPP1	VDR	WNT5B
Proliferation_DLBCL	AARS	ACO2	ACP1	ACTB	ACTG1	ACTG2	ACTL6A	ACTR2	ACY1	ADARB1	ADD3	ADSL	ADSS	AIFM1	AK2	AKAP1	AKAP10	AKT1	AKT2	ALDH18A1	ANKRD17	ANP32A	AOF2	AP1G2	APEX1	APRT	ARHGAP11A	ARHGAP19	ARL6IP1	ARPC2	ASNS	ASPM	ATAD1	ATE1	ATF4	ATG12	ATIC	ATP2C1	ATP5B	ATP5J	ATP5L	ATP5O	ATP6V0B	AUP1	AURKA	AURKB	BAG1	BAT2D1	BAT3
Proliferation_DLBCL_survival	GNL3	MYC	NPM3
Proliferation_Node1542	AKT1	AP2S1	AP3D1	ARHGEF18	ATPIF1	C1QBP	COPE	COX5A	CTBP1	DNMT1	LSM7	MRPS12	NDUFB7	NDUFC1	POLR2J	POLR2J3	PPP1CA	PRKCSH	PRMT1	PRR13	SDF4	SEC13	SF3B5	SLC25A11	SLC25A6	SMARCA4	TAPBP	U2AF1	UBE2L3	UQCRC1
Proliferation_Node1606	APRT	CLIC1	GLTSCR2	GNG5	HDAC1	HNRNPAB	HNRNPF	LOC402057	LOC642741	LOC728937	LOC730288	MBD2	NONO	OXA1L	P4HB	PABPC1	PABPC3	PDIA3	PLP2	PPIB	PTBP1	RPL12	RPL13	RPL13A	RPL18A	RPL29	RPL8	RPLP0	RPN2	RPS19	RPS2	RPS21	RPS3	RPS5	SEC61A1	SERP1	TAGLN2	UXT
Proliferation_Node1618	ANP32B	ASPM	BIRC5	BUB1B	CCNB1	CCNB2	CDC2	CDC20	CDCA3	CDCA8	CDKN3	CENPF	CENPM	CKS2	DTL	ESPL1	EZH2	FANCI	FOXM1	GINS2	H2AFZ	HJURP	HMGA1	HMGB2	HMMR	KIAA0101	KIF20A	KPNA2	LBR	MAD2L1	MCM2	MCM4	MCM5	MCM7	MELK	MLF1IP	MRPL42	NCAPG	NCAPH	NDC80	NUP62	NUSAP1	ODC1	PBK	PCNA	PRC1	PSME4	RANBP1	RRM2
Proliferation_Node1640	ACTR3	ANKHD1	BUB3	CBX3	CCT6A	CCT8	CROP	CSE1L	DARS	DDX50	DEK	DHX15	DNAJC2	EIF3A	EIF3E	EIF3M	EXOSC8	FXR1	GTPBP4	HAT1	HMGB1	HMGN1	HSP90AA1	HSPA4	JOSD3	MATR3	MBD4	METAP2	MTHFD2	MTIF2	NASP	NKTR	NPM1	PIP5K3	PNN	PSMA3	PSMC6	RAN	ROCK1	RPL11	RPL17	RPS7	SERBP1	SMARCE1	SNRPD1	SNRPD3	SRP72	SSB	SSBP1
Quiescence_heme_all	ABTB1	ADAM8	ADD3	ADH4	ADPGK	AES	AHNAK	AKNA	AOAH	AP3D1	ARHGAP25	ARHGAP27	ARHGAP9	ARID4B	ARL4C	ARL6IP5	ARMC5	ARPC4	ATG12	ATP2A3	ATP6V0E1	ATR	B2M	B3GALT4	BCAP31	BICD2	BIN1	BIN2	BIRC2	BRAP	BRD2	BTG1	C20orf24	C2orf28	C2orf68	C3orf19	C3orf63	C6orf62	C7orf26	CAB39	CALM1	CAMK1D	CAP1	CASP4	CCDC120	CCDC128	CCDC88B	CCNDBP1	CD44
Quiescence_heme_cluster1	ABTB1	ADAM8	ADD3	ADPGK	AHNAK	AKNA	AOAH	ARHGAP25	ARHGAP27	ARHGAP9	ARL4C	ARL6IP5	ARPC4	ATP6V0E1	B2M	B3GALT4	BCAP31	BICD2	BIN1	BIN2	BTG1	C20orf24	C2orf68	CALM1	CAP1	CASP4	CCDC88B	CD44	CD52	CD97	CENTB2	CHKB	CLEC2B	CMTM7	COL4A3BP	CSGALNACT1	CTDSP1	CTSO	CYBA	CYTH4	DAZAP2	DHRS7	DKFZP434B0335	DOCK11	DOK2	DPEP2	ELK3	EMP3	EVI2B
Quiescence_heme_cluster2	AP3D1	ARMC5	ATG12	ATP2A3	BIRC2	BRAP	BRD2	C2orf28	C3orf63	C6orf62	C7orf26	CAB39	CAMK1D	CCDC120	CCDC128	CCNDBP1	CEP350	CSGLCA-T	CYP20A1	DDX46	DDX5	DKFZp547I224	DUSP23	DYRK1A	EDF1	EHBP1L1	EIF5	EP300	EPC2	EXOC3	FAM21B	FAM21C	FAM58A	FASTK	FBXL3	FOLR1	GMEB1	GTF3A	HEATR1	HNRNPAB	HNRNPK	KIAA0430	KIAA1012	KLHL21	KTELC1	MAPRE2	MAT2B	MED29	MGA
Quiescence_heme_cluster3	ADH4	CNOT8	FBXO9	FLOT2	FOXO3	KLF13	LGI3	MARCH8	RSU1	SERINC3	TARSL2	VEZF1
Regulatory_T_cell_McHugh_Herman_concensus	CD2	CISH	GADD45G	GBP4	GLRX	GZMB	IL10	IL2RA	LGALS1	LY6E	MDFIC	NCF4	RRM2	S100A10	S100A6	TNFRSF18	TNFRSF4	XBP1
Regulatory_Tcell_FOXP3+_3x_gt_CD4+Tcell	C1orf130	CCR8	CD80	DST	FAM55B	FOXP3	IKZF2	IL10	IL1RL1	ITGAE	ITIH5	KLRG1	LAMC1	LYCAT	MATK	NEB	PARD6G	PATL2	PGLYRP1	PSG9	RAPGEF5	SLC2A3	STON1	SWAP70	SYTL1	SYTL2	TACSTD1	TPR
Regulatory_Tcell_FOXP3+_4x_gt_CD4+Tcell	C1orf130	FAM55B	FOXP3	IKZF2	ITGAE	KLRG1	LAMC1	MATK	NEB	TACSTD1	TPR
Resting_blood_B_cell_GNF	ABCB4	ADAM28	ADK	AIM2	AKAP2	ARMC3	BANK1	BIRC3	BLK	C1QTNF7	C1orf165	CACNA1A	CCR6	CD19	CD200	CD22	CD24	CD37	CD40	CD72	CD79A	CD79B	CNTNAP2	CORO2B	CR2	CXCR5	EBF1	EZR	FADS3	FAM30A	FCER2	FCRL1	FCRL2	FCRLA	GYLTL1B	HIP1R	HLA-DOB	HRK	HVCN1	ID3	IFT57	IGHG1	IL4R	KCNG1	KIAA0040	LARGE	LCN6	LOC100133678	MAP4K2
Resting_blood_NK_cell_GNF	ADAMTS1	APOL1	CCL4	CD160	CD300A	CST7	DLG5	DLL1	DMKN	FCGR3B	FCRL6	FEZ1	FSD1	GNGT2	GNLY	GNPTAB	GPR56	GZMH	HOPX	IFI16	IGFBP7	IL18RAP	IL2RB	IL8RA	KIR2DL1	KIR2DL2	KIR2DL3	KIR2DL5A	KIR2DS1	KIR2DS2	KIR2DS4	KIR2DS5	KIR3DL1	KIR3DL2	KIR3DS1	KLRD1	KLRF1	LAIR2	LOC100129913	LPCAT1	LYPD2	MAFF	MMP23B	MPPE1	MYOM2	NCAM1	NCR1	NKG7	NMUR1
Resting_dendritic_cell_GNF	AHI1	ALOX5AP	AP1S3	APP	ATP13A2	BIK	C10orf118	C10orf58	C1orf186	C20orf103	C5orf32	C7orf58	C9orf127	CCDC50	CIB2	CLN8	COBL	CSF2RB	CUX2	CYP46A1	DUSP3	DUSP5	ELL	EPHA2	EPHB1	FCER1A	FLJ42627	FLNB	FLT3	FUT4	FUT7	GAS6	GSN	GUCY2D	HLA-DRB1	HLA-DRB4	IDH3A	IGFBP3	IL3RA	IRF4	IRF7	IRF8	ITM2C	KCNA5	KCNK10	KCNK17	KCTD19	KCTD5	KIAA1274
Resting_monocyte_GNF	AGPAT9	AIF1	ALDH3B1	ANXA2	APLP2	APOBEC3A	AQP9	ASAH1	ASGR1	ASGR2	BPI	BST1	BTBD14A	C11orf75	C19orf38	C5AR1	CASKIN1	CCR1	CD14	CD163	CD1D	CD300LB	CD33	CD93	CDA	CEBPA	CEBPB	CEBPD	CENTA2	CFD	CFP	CHST7	CITED4	CKAP4	CLU	COTL1	CPNE9	CRISPLD2	CSF1R	CSF3R	CSTA	CTSS	CYP1B1	CYP27A1	DHX57	DMXL2	DPYD	DUSP1	DUSP6
Resting_panT_cell_CD4+CD8+_GNF	AKTIP	ANKRD36B	ATHL1	ATM	ATXN7	BCL11B	C1orf56	C1orf63	C21orf96	C6orf190	CAPS	CBR4	CD28	CD3D	CD3E	CD40LG	CD44	CD6	CDC14A	CDR2	DGKA	DOCK10	ENO2	EPHX2	FAM113B	FBLN5	FLT3LG	GIMAP5	GOLGA8A	GOLGA8B	GPR171	GPRASP1	GSDMB	HIST1H3D	ICOS	IKZF1	IL7R	ITGA6	LDLRAP1	LEF1	LOC129293	LOC653188	LOC730092	LRRN3	LTBP3	MOV10	MTRF1	N4BP2L2	NELL2
Reticulocyte_large	ACTB	ADIPOR1	ALAS2	ALS2CR2	ATP5E	ATP6V0C	BCL2L1	BLVRB	BNIP3L	BPGM	BSG	BTF3	C19orf22	C1orf128	C20orf108	CA1	CAT	CCNDBP1	CSDA	E2F2	EIF1	EIF2AK1	EPB41	EPB42	EPB49	FAM104A	FAM46C	FBXO7	FBXO9	FECH	FOXO3	FTH1	FTHP1	FTL	GABARAP	GABARAPL2	GLRX5	GLUL	GNAS	GPX1	GSPT1	GUK1	GYPB	GYPC	HBA1	HBB	HBD	HBG2	HBM
Reticulocyte_small	ALAS2	ALS2CR2	BNIP3L	C19orf22	FAM46C	FBXO7	FTL	HBA1	HBB	HBG2	HBM	NCOA4	OAZ1	PL-5283	SLC25A37	SLC25A39	SNCA	TPT1	UBA52	UBB
Ribosomal_protein	NUDCD3	RPL13	RPL27	RPL37	RPL37A	RPLP0	RPLP1	RPS16	RPS2	RPS20	RPS21	RPS25	RPS27A	RPS3A	RPS5	RPS6	RPS9	RPSA	TSPAN4
SREBP1a&2_up_Scap_dep	AACS	ACACA	ACLY	ACSS2	AKAP9	ALDOC	CYB5B	DHCR7	ELOVL6	FASN	FDFT1	FDPS	HMGCR	HMGCS1	HSD17B7	IDI1	INSIG1	LDLR	LSS	ME1	MID1IP1	MVD	NSDHL	PCSK9	PMVK	RDH11	SC4MOL	SC5DL	SQLE	SREBF1	STARD4	TM7SF2	TMEM97
SREBP1a&2_up_Scap_indep	ABCG5	ABCG8	ACSL3	ALDH1A1	AQP8	BLVRB	CBR1	CHRNA4	CORO1C	CYP2C18	DPYSL2	FAM126A	FAM62B	GSTM3	KLF16	LOC153364	NFE2	ORM2	PLTP	PSTPIP2	RNF146	SCD	SLC25A37	TREX2
SREBP1a_up	ACACB	ACSL4	ACSL5	CSAD	ECHDC1	EHHADH	FADS1	FADS2	GSTM4	HSP90B1	MFSD1	PDK1	SCD	THRSP
SREBP2_up	C14orf1	GP2	HES6	MVK	REG1B	SC5DL	SOD2	TFF3	TM7SF2
STAT3_up_OCILy10	AIM2	ARHGEF6	BANK1	BCL6	BIC	BIRC2	BIRC3	C14orf143	CD14	CD36	CXCL13	DHRS9	DUSP1	FUT8	GCA	GLRX	GNG10	GPR183	HIF1A	ID2	IFNGR1	IL10	IL2RB	ITM2B	JUN	KLHL6	LILRB1	MARCH1	MNDA	PHLDA1	PRDM1	PSMB9	PTPN2	RHOH	SAMSN1	SATB1	SNX9	SOCS2	ST8SIA4	STAT3	STK17A	TANK
STAT3high_ABC_DLBCL_subgroup	ACTG2	ARPC2	AURKA	BANK1	BCL2A1	BCL3	BIC	BIRC2	BIRC3	C5AR1	CAMK2D	CD40	CD44	CD53	CDC123	CHEK1	CSK	CSNK2A1	CTH	CTSL1	DENND3	DHRS9	DOK1	DUSP5	EIF2S2	EIF4E	EIF5	ENO1	FAS	FERMT2	FLI1	FTSJ1	FUT8	GLRX	GNAI3	GNB1	GNB2	GPR183	HCK	HIF1A	HN1	ID2	IL21R	IL2RA	IMPDH1	ITGB1	JAK1	JUN	JUNB
STAT3low_ABC_DLBCL_subgroup	BCL2	BCLAF1	DGKA	TNK2
Salivary_secretory_gland_Node1603	HTN1	HTN3	MUC7	PIP	PRB1	PRB3	PRB4	PRH2	PRR4	SMR3A	SMR3B	STATH
Serum_response_Fb_down	ACTL6A	ADAMTS1	ADCY3	ALKBH7	BCCIP	BRCA2	BRIP1	C11orf24	C12orf24	C13orf1	C13orf27	C16orf61	C18orf24	C19orf48	C3orf26	CBX1	CCT5	CDCA4	CDK2	CENPJ	CENPN	CEP78	CHEK1	CKLF	COPS6	COQ2	CORO1C	COTL1	CRAMP1L	DBF4	DBNDD1	DCBLD2	DCK	DCLRE1B	DHFR	DLEU1	DLEU2	DUT	DYNLT1	EBNA1BP2	EEF1E1	EIF2AK1	EIF4EBP1	EIF4G1	EMP2	ENO1	EPHB1	ERLIN1	EXOSC8
Serum_response_Fb_up	ABHD14B	ACCS	ACIN1	ACSL3	ACSS2	ADD3	ANKRD12	APOD	APP	ARHGAP12	ARHGEF3	ARID5B	ARMCX3	ARPC4	ARSD	ATP6V0A1	AXIN2	BBC3	BCL6	BDH2	BHLHB2	C10orf10	C10orf26	C10orf33	C17orf58	C1S	C1orf198	C20orf108	C4orf18	C4orf34	C5orf4	C5orf41	C7orf58	CALCOCO1	CAMLG	CCNG2	CCNL2	CCPG1	CD46	CD82	CDC14B	CDC2L2	CDKN1A	CDKN1C	CFB	CLCN6	CLIC2	CNTNAP1	CPM
Splenic_Marginal_zone_Bcell_gt_naive_and_GC_Bcell	ADAR	CASP1	CCDC50	CD1C	CD24	CTSB	DLEU1	FCRL2	FCRL3	GNPDA1	HIST1H2AC	HIST1H2BK	IFI44	ISG15	LEPROTL1	MARCKS	NCRNA00084	OAS1	PARP9	PHKB	PTPN12	TNS3
Splenic_marginal_zone_Bcell_gt_GC_Bcell	ANKZF1	APOL3	ARL4C	BCL2	CASP1	CASP4	CBLB	CCDC50	CCL4	CD1C	CD1D	CD24	CD44	CD6	CEPT1	CLEC2B	CR1	CR2	CTSB	DLEU1	DTX4	FAM129C	FCRL2	GBP2	GNPDA1	GPX7	HIST1H2AC	HK2	IFI44	IFIT1	IGF2R	IL24	IL6	IRF9	ISG15	ITM2B	LEPROTL1	MPEG1	OAS1	PARP9	PDHA2	PHKB	PTEN	PTPN12	S1PR1	SCARB2	SLA	SLC2A3	SYTL2
TGFbeta_down_epithelial_large	ADRB2	BIRC3	BMP4	C13orf15	CEBPD	CITED2	CYP1B1	HS3ST1	ID1	ID2	ID3	IL1B	LDLR	MYC	PTGER4	RRS1	SERTAD2	SPRY2	TXNIP	UGCG
TGFbeta_down_epithelial_small	BIRC3	C13orf15	CITED2	ID1	ID2	ID3	IL1B	MYC	SERTAD2	UGCG
TGFbeta_up_epithelial_large	ADAM19	ANGPTL4	ARHGEF18	ATF3	BHLHB2	BMPR2	CDKN1A	CDKN2B	CGB	COL4A1	CTGF	CYP26B1	DLX2	EPHB2	ETS2	FSTL3	GADD45B	GRB10	IGL@	IL11	ITGA5	ITGB6	JAG1	JUN	JUNB	MAP3K4	MN1	NEDD9	NKX3-1	P2RY2	PIM1	PLAU	PMEPA1	SERPINE1	SGK1	SKIL	SLC19A2	SMAD7	SMURF1	SMURF2	SOX4	SPHK1	ST3GAL1	TBX3	TUFT1	VDR	VEGFA	WNT5B
TGFbeta_up_epithelial_small	ANGPTL4	BHLHB2	CGB	CTGF	DLX2	EPHB2	MN1	NEDD9	P2RY2	SERPINE1	SKIL	SMAD7	VEGFA
T_NK_Node1604	CCL5	CD2	CD247	CD3D	CD3G	CD7	CTSW	FAIM3	GNLY	GZMH	IL23A	IL7R	LAT	LCK	PRF1	SH2D1A	TARP	TRA@	XCL2	ZAP70
T_NK_Node5808	CD160	CD28	CD6	CD8A	CD8B	CD96	GIMAP5	GPR171	IL18RAP	KIR3DL2	KLRD1	KLRF1	MAF	PTGDR	RORA	SH2D1A	SIRPG	SPON2	SYNE2	XCL1
T_cell	CD2	CD247	CD3D	CD3E	CD3G	CD5	CD6	CTLA4	FYB	LAT	PRSS1	SH2D1A	THPO	TRA@	ZAP70
T_cell_up_ionomycin_anergy	CASP3	DGKA	FASLG	GBP4	IKZF1	JARID2	LDHA	PTPN1	PTPRK	PTPRS	RAB10	RGS2	SLC3A2	TLE4	TNFRSF9	TRAF5
Tcell_PIind4x_CsAindependent	DUSP2	DUSP5	EI24	FLJ43663	FOS	GPR183	GZMH	IL2RA	IL6	NAB2	NFKB2	ODC1	POU2F2	QSOX1	RELB	RGS16	SGK1	SNX9
Tcell_PIind4x_Feske_Fig4	AIM1	AIM2	BAG3	BCAR3	BCL2A1	BIC	BIRC3	BTG2	BZW1	CCL3	CCL4	CD200	CD4	CD44	CD69	CD83	CDK6	CDKN1A	CFLAR	CSF1	CSF2	CTLA4	DUSP6	EIF2C2	ELL2	EVI2A	FAM3C	FASLG	FOS	FOSL2	FOXP1	GADD45B	GEM	GPR183	IER3	IL10	IL13RA1	IL2	IL21R	IL4	IL8	INSIG1	IRF4	ITGA6	KITLG	KLF10	LARP2	LIF	LRRC8B
Tcell_PIind4x_Feske_Fig6	AIM1	AIM2	ATF3	BACH2	BCL2A1	BCL2L1	BIC	BIRC3	BTG2	BZW2	CALD1	CCL3	CCL4	CD200	CD4	CD40LG	CD44	CD55	CD72	CD83	CDK6	CFLAR	CHD1	CSF1	CSF2	CTLA4	DDX21	DUSP2	DUSP5	DUSP6	EIF2C2	ELL2	ETV3	FASLG	FOS	FOSB	FOSL2	FYN	GEM	GNG4	GPR18	GZMB	ICAM1	IER3	IFNG	IL10	IL13	IL2	IL21R
Tcell_PIind_CalciumDefPtdown4x_Feske_Fig4	AIM1	ANKRD44	BCAR3	CAMK2D	CCL3	CCL4	CD4	CD48	CDK6	CFLAR	CSF1	DAPP1	DUSP6	ELL2	EVI2A	FASLG	FOSL2	GNAS	H3F3B	HIST1H2AC	IL10	IL2	IL4	IL8	IMPDH1	JUN	LIF	LTA	MAOA	MAP3K8	MAPK1	MAST4	MBNL1	MDFIC	MYC	N4BP2	NAMPT	PELI1	PGAM1	PMAIP1	PPP1R15B	PTPN1	QSOX1	RAN	RHOH	SCD	SESN3	SIAH2	SLA
Tcell_PIind_CalciumDefPtdown4x_Feske_Fig6	AIM1	AREG	ATF3	BIRC3	CAMK2D	CCL20	CCL3	CCL4	CD200	CD24	CD27	CD40LG	CD55	CD72	CD83	CDK6	CFLAR	CSF1	CTLA4	EIF2C2	ELL2	ETV3	FLT1	FOS	FOSB	FOSL2	GCA	GEM	GNAS	GPR18	GZMB	IER3	IL10	IL18R1	IL2	IL21R	IL4	IL6ST	IL8	IRF4	JUN	KLF9	LIF	MAP3K8	MAPK1	MAPKAPK2	MAPRE2	MICA	MYC
Tcell_PIind_CsAdown4x	AIM1	AREG	BIRC3	CAMK2D	CCL4	CD200	CD24	CD40LG	CD72	CD83	CFLAR	CSF1	ELL2	ETV3	FLT1	FOS	FOSB	FOSL2	GNAS	GPR18	GZMB	HSPA1A	IL10	IL13	IL18R1	IL2	IL21R	IL4	IL6	IL6ST	IL8	IRF4	IRF8	JUN	KLF9	LIF	MAP3K8	MAPK1	MAPKAPK2	MDFIC	MPO	MYC	NR4A2	NR4A3	PELI1	PGAM1	PPP1R2	PRNP	REL
Tcell_PIrep4x_CsAindependent	ADA	CDKN2C	FADS1	MCM2	MXD3	SUSD3	TOX	TXNIP	UNG
Tcell_PIrep4x_Feske_Fig4	ACTB	ATM	BMF	CLIP1	FAM102A	HMGB2	IL16	IL9R	ITGAL	KIAA1370	LCK	LOC284561	MGEA5	MX1	NLRC3	PCNA	PDCD4	RPS6KA5	SIT1	SKAP1	SNAP25	SP100	TMC8	TOX	TUBB	TXNIP
Tcell_PIrep4x_Feske_Fig6	ACTB	ACTG1	ADA	ATM	ATP2A3	BAD	BIRC5	CCR1	CCR5	CDC25B	CDK2	CDKN2C	CENPF	CISH	CORO1A	CYFIP2	FAM102A	FYB	GLIPR2	GNAI2	HMGB2	HMMR	IL16	IL32	IL9R	ITGAL	ITGB7	KIF23	LCP1	LIMD2	LY6E	MCM2	MCM7	MXD3	NLRC3	PCNA	PLK1	PRKACA	PRKACB	PSMB9	RB1	RBL2	RCBTB2	RFC4	RGS9	RNF144A	RPA1	SIPA1	SMARCA2
Tcell_PIrep_CalciumDefPtup4x_Feske_Fig4	ATM	BMF	CXCR4	EML4	FAM102A	IL16	IL9R	IRF1	ITGAL	ITGB2	KIAA1370	LCK	LOC284561	N4BP3	NKTR	PPP3CA	RGS1	SELE	SIT1	SNAP25	SQRDL	STAT1	SYTL2	TMC8	TRERF1	TXNRD1	ZFP36L2
Tcell_PIrep_CalciumDefPtup4x_Feske_Fig6	ARMET	ATM	BMF	CAMK1	CCR1	CCR5	CD53	CISH	CKLF	CLEC2B	CORO1A	CYTIP	DAPK2	DENND1B	EGR1	EML4	FYB	IFI44L	IKBKE	IL16	IL9R	ISG15	ITGAL	ITGAM	ITGB2	ITGB7	LCK	LCP1	LIMD2	LTB	NEK6	NFATC3	NLRC3	PPP3CA	PRKACB	PRKCI	RCBTB2	RPA1	SP110	ST6GAL1	TMC8	TRAT1	TSPAN17	TUBB	TXNIP	UPP1	ZNF24
Tcell_PIrep_CsAup4x	CAMK1	CCR1	CCR5	CD53	CKLF	CORO1A	CXCR4	DAPK2	IL16	IL9R	ITGAL	ITGB2	ITGB7	NFATC3	PPP3CA	PRKACB	PRKCI	RGS1	ST6GAL1	TRAT1	TSPAN17
Tcell_cytokine_induced_Bcell_induced	CEACAM1	CYTIP	FAM102B	HOMER2	PAK1
Tcell_cytokine_induced_IL2_IL7_IL15_IL4	BCL2	CASP3	CD69	CISH	CSF1	CSF2	CXCR4	DARS	DPP4	DUSP6	IL18R1	SNX10	SOCS1	TAC4	XBP1
Tcell_cytokine_induced_IL2_IL7_IL15only	ADAM19	AHR	CCL3	CCL4	CCND2	CDK6	CEACAM1	DUSP5	FLT3LG	GARS	IL2RA	LIF	LTA	MDFIC	MLLT3	MX1	PIM1	PMAIP1	RGS16	TNF	TNFSF10	UPP1	WARS
Tcell_cytokine_induced_IL4only	CAMK2D	FAM102B	HOMER2	IL4R	MAL	SPINT2
Tcell_cytokine_induced_PBMC_Bcell_nochange	CAMK2D	CCR2	CXCR4	DPP4	E2F4	EIF2AK2	FLT3LG	GZMA	IFITM1	IL18R1	MAL	MFHAS1	MLLT3	MMD	MX1	NCOA3	PDE4B	PTP4A1	PTPN9	RALB	RPS6KA5	SAMHD1	SNX10	SPINT2	ST13	TNFSF10	TOX	XBP1
Tcell_cytokine_induced_PMBC_Bcell_induced	ACTG1	BCL2	BHLHB2	BIC	CCL3	CCL4	CCND2	CCR1	CREM	CSF1	DARS	DNAJC3	DUSP5	FOSL2	GBP1	GPR183	HSPA5	ICAM1	IL2RA	IRF4	MDFIC	OAT	PPP1R15B	PRNP	RGS16	SAMSN1	SGK1	SLAMF1	TNF	WARS
Tcell_cytokine_induced_PMBConly_Iinduced	ACTB	ADAM19	AHR	APOBEC3F	ARL4C	ATF4	CASP3	CBFB	CCR1	CD53	CD55	CD69	CISH	CSF2	CSF2RB	CXCR4	DUSP6	GEM	IL4R	KLF6	LCP2	LIF	LTA	NDUFV2	PARP14	PIM1	PMAIP1	PTPN7	SOCS1	SOS1	STAT1	STAT4	TAC4	TNFRSF1B	TNFSF13	TOP1	UBE2L6	UPP1	VIM	XCL1	ZBED2
Tcell_cytokine_induced_prolif	ARMET	C1QBP	CDK6	CTPS	CYP2B6	ENO1	GARS	GNG10	GOT1	GSTO1	HSP90AA1	ID2	IER3	ISG15	MAPKAPK3	MAT2A	MTHFD1	NAMPT	NME1	NOLC1	PA2G4	PAICS	PRMT1	TXN	TXNRD1	UCK2	YES1
Tcell_cytokine_repressed	ADA	BMF	CAMK4	CCR7	CD27	CDC25B	CYTH4	DPEP2	EPHB6	F5	FAM102A	FYB	GRAMD1A	HIST1H2AC	HVCN1	ID3	IL24	ITGAX	ITGB7	KIAA1370	KLRC4	LGMN	LRMP	NLRP1	PASK	PBXIP1	PDCD4	PMS2	PTPRN2	RPS15A	SELL	SORL1	STK38	TCF7	TRIB2	TSC22D3	VNN2	ZFP36L2
Testis_Node1662	ACTL7A	ACTL7B	AKAP3	AKAP4	ANKRD7	C1orf175	CABYR	CCIN	CITED1	CREM	CRISP2	DDX4	DKFZP566E164	DKKL1	DNALI1	DPEP3	GAGE12F	GAGE12I	GAGE4	GAGE5	GAGE6	GAGE7	GAPDHS	GPR135	GSG1	GSTM3	INSL3	JMJD2D	LOC81691	LRRC50	MLF1	MS4A5	NME5	OAZ3	ODF1	ODF2	PGK2	PHF7	PPP1R2P9	PRM1	PRM2	PRND	RIBC2	ROPN1B	SAMD4A	SMCP	SOX5	SPAG6	SPANXB1
Thymic_DP_Tcell_gt_Thymic_SP_CD4+Tcell	ACSBG1	ADA	AEBP1	AKAP2	ARPP-21	BCL2L1	C12orf65	C14orf145	C17orf67	C18orf1	C2orf67	C9orf103	CASC5	CBFA2T3	CCDC88A	CD1A	CD1B	CD1C	CD1D	CD1E	CD8A	CD8B	CD99	CEP70	CHD1	CHRNA3	CIB2	CPLX1	CPVL	CXXC5	DAPK1	DEPDC1	DNMBP	E2F7	ECOP	ECT2	EFNB2	FAIM	FBXL12	GAB2	GALNT2	GFI1	GNA15	KIAA0182	LANCL2	LETM1	LOC100131998	LOC202781	LOC283454
Thymic_DP_Tcell_gt_Thymic_progenitor_Tcell	ACSBG1	ADORA2A	AKIRIN2	ARHGEF7	BCL6	C13orf15	C9orf103	CALN1	CCR9	CD52	CD8A	CD8B	CENTD1	CIB2	COL6A3	CPLX1	CUGBP2	DNMBP	ECOP	EDEM1	EGR1	ELK3	EPB41	EPHX2	EVI2A	FAIM3	FAM101B	FRY	INSIG2	ISG20	ITPKB	KAT2B	KBTBD11	LBH	LOC284757	LRRC16A	LTB	LYST	MAML2	MGC40069	MITF	MTSS1	NFATC3	PCSK5	PLCXD2	RALGPS1	RASD1	RASSF6	RBM35B
Thymic_SP_CD4+Tcell_gt_Blood_CD4+Tcell	AUTS2	BCAT1	BCL11A	BCOR	BTBD3	C4orf31	C5orf13	C6orf173	CCR9	CCRL2	CD1A	CD1B	CD200	CD93	CDK2AP1	CENTD1	CHI3L2	CHST2	CKAP2	CLDN1	CMPK2	COL6A3	CORO1C	CREM	CTA-221G9.4	CTSL1	CXXC5	DAPK1	DPPA4	DUSP2	DUSP6	EGR1	EGR3	ENC1	FLJ22536	FLJ36840	GNB4	GSTA4	HIST1H2AC	HPGD	HTR2B	ICOS	IDH2	IFI44L	IGF2BP3	IRAK2	ITM2A	JARID1B	KLF10
Thymic_SP_CD4+Tcell_gt_Thymic_DP_Tcell	ABLIM1	ACTN1	AMICA1	ANK3	ANKRD55	BAG3	BTLA	BTN3A3	C20orf118	C4orf31	CACHD1	CAMSAP1L1	CCR7	CD27	CD44	CD55	CISH	CLDN1	CLEC2D	COTL1	CTSL1	CYLD	CYTIP	DDX60	DENND2D	DHRS3	DNAJC16	EMP3	EPAS1	FAM91A2	FOXO1	GALNAC4S-6ST	GALNT11	GBP1	GBP2	GIMAP4	GIMAP5	GIMAP7	GIMAP8	GOLGA8A	GPR171	GPR183	GPR65	GSTA4	HCP5	HLA-A	HLA-B	HLA-C	HLA-E
Thymic_progenitor_Tcell_gt_Thymic_DP_Tcell	ARMCX1	C12orf32	C13orf18	C4orf32	CFH	CISH	CTNND1	FXYD2	GSTM3	GUCY1A3	HES1	HIVEP3	IFI44	IFI44L	IGJ	KCNK17	MDFIC	MEST	MPEG1	PLAC8	PRKCA	RGPD1	RGPD5	RRAS2	RSAD2	SCN3A	SELL	SOCS2	TLR7	TNFSF4
XBP1_target_all	ACSS1	ALDH1A1	ARF3	ARMET	ATP2A2	BMP6	CD81	CDKN3	COPE	COX15	CREBL1	CST3	DAD1	DDOST	DEGS1	DNAJB9	DNAJC10	DNAJC3	EDEM1	ERGIC1	FKBP14	FNBP1	FTL	FTSJ1	GCS1	GLRX	GPR89B	HERPUD1	HM13	HSP90B1	HSPA5	ISG20	ITGAM	ITGB5	LIPA	LMAN1	MCFD2	MGAT2	MGC29506	OS9	PDIA3	PDIA4	PDIA5	PLOD1	PPIB	PPP2CB	PRDX4	RABAC1	RBM7
XBP1_target_other	ACSS1	ALDH1A1	ARMET	BMP6	CD81	CDKN3	COX15	CREBL1	CST3	DEGS1	FNBP1	FTL	FTSJ1	GLRX	GPR89B	ISG20	ITGB5	LIPA	MGC29506	PPP2CB	PRDX4	RBM7	RNASE4	SLC1A4	SLC3A2	SLPI	SPOP
XBP1_target_secretory	ARF3	ATP2A2	COPE	DAD1	DDOST	DNAJB9	DNAJC10	DNAJC3	EDEM1	ERGIC1	FKBP14	GCS1	HERPUD1	HM13	HSP90B1	HSPA5	ITGAM	LMAN1	MCFD2	MGAT2	OS9	PDIA3	PDIA4	PDIA5	PLOD1	PPIB	RABAC1	RHOQ	RPN1	SEC23B	SEC24C	SEC61A1	SEC61G	SLC30A5	SLC33A1	SPCS3	SRP54	SRP9	SRPR	SSR1	SSR3	SSR4	ST6GALNAC4	SYVN1	TMED10	TRAM1	TXNDC5	UAP1	USO1
p53_up_Xray	BTG1	BTG2	CCNG1	CDKN1A	DDB2	ENC1	FAS	IER5	MDM2	PCNA	PMAIP1	PPM1D	PRKAB1	RRM2B	TRIM22	XPC
p53_targets	VDR	VCAN	UBD	TYRP1	TSC2	TRPM2	TRIM22	TRIAP1	TP73	TP53INP1	TP53I3	TP53	TNFRSF10D	TNFRSF10C	TNFRSF10B	TNFRSF10A	TGFA	TAP1	STEAP3	SLC38A2	SH2D1A	SFN	SERPINE1	SERPINB5	SCN3B	SCD	SCARA3	S100A2	RRM2B	RPS27L	RNF144B	RFWD2	RB1	RABGGTA	PYCARD	PTK2	PTEN	PRKAB1	PRDM1	PPM1J	PMS2	PML	PLK3	PLK2	PERP	PCNA	PCBP4	P2RX6	ODC1
NFkB_Targets	GSTP1	B2M	ALOX12	IRF2	C4BPA	CASP4	CD40	ABCB1	PLA2G4A	PTX3	HAS1	PDYN	CTSL2	CRP	TNF	IL1A	SELP	PTGS2	IL1RN	CD209	LAMC2	MADCAM1	ELF3	AMH	SCNN1A	LTA	CCL3	SLC2A5	TNFRSF9	BCL2	TACR1	STAT5A	ARFRP1	IL8	AGER	CD83	IL15RA	MYC	CXCL2	HBE1	TNFRSF21	IRF1	FAS	TAPBP	VEGFC	VIM	CXCR5	PSMA2	FASLG
NFkB_Targets_Young.Lab	ABCB1	ACCN1	ADH	ADORA1	AFP	AGER	AGPAT1	AGT	ALOX12	AMH	APOC3	APP	AR	ARL1	B2M	BCL2	BCL2A1	BCL2L1	BCL2L10	BDKRB1	BF	BIRC2	BIRC3	BMP2	C2	C3	C4A	CALCA	CARD15	CASP4	CCL1	CCL11	CCL15	CCL19	CCL2	CCL21	CCL22	CCL23	CCL28	CCL3	CCL4	CCL4L	CCL5	CCND1	CCR5	CCR7	CD209	CD3G	CD48
Foxp1_Targets	SEPT9	AASDHPPT	ADAM29	ADRM1	AKT1S1	ALG10	AMY1A	APBB1IP	ATF5	ATF6	BAT4	BCLAF1	BIK	BTG1	BUB3	BXDC5	C12orf30	C1orf119	C1orf138	C22orf26	C2orf17	C3orf38	C5orf14	C5orf33	C7orf11	C7orf30	C7orf49	C8orf41	CALM2	CBLL1	CBX3	CD37	CD55	CEP68	CFLAR	CHMP2B	CIRH1A	CITED2	CKAP2	COPG	COX7C	CRADD	CSNK2B	CTDSP2	CXXC4	DAZAP2	DCAKD	DHTKD1	DHX40
Myc_Targets	ABCB10	ABCB6	ABCC4	ABCE1	ABL1	ABT1	ACAD8	ACADM	ACE	ACHE	ACO2	ACOX1	ACOX3	ACP5	ACPP	ACTG1	ACTR3	ACYP2	ADAM22	ADAM9	ADCY9	AGPS	AHCY	AHCYL1	AHSG	AK3	AKAP1	AKAP10	AKAP9	AKR1A1	AKR7A2	ALDH2	ALDH9A1	ALG5	ALOXE3	AMD1	AMMECR1	AMPD2	AMPD3	AP4B1	AP4E1	AP4M1	AP4S1	APBA3	APC	APEX1	APP	AQR	ARF1
BCL6_target_ChIPseq	ZEB2	ZEB2	TBL1XR1	ZEB2	MBNL3	RNASEH2B	RNASEH2B	NEK7	SNX5	KLF12	HEXIM1	RHOH	MYC	FLJ43663	TNFAIP8	VPS35	MIR941-2	ZNF608	GPR18	DUSP5	SNX5	ORC6L	C14orf43	C20orf72	MIR941-3	KIAA0922	GPR18	KIAA0922	IRF8	CSPP1	PPIA	ARID5B	NFATC3	WNT5A	PTPRC	RUNX1	BTG2	DTL	SGCE	MLKL	TIPARP	ANKRD12	LSR	RASGRP3	CDCA7L	RUFY1	CSPP1	LNPEP	RBMS3
BACH2_target_ChIPseq	MARCH1	MARCH6	MARCH7	MARCH9	SEPT1	SEPT2	SEPT6	SEPT7	SEPT11	SEPT12	SEPT13	5_8S_rRNA	5S_rRNA	7SK	A4GALT	AAAS	AAGAB	AANAT	AARS2	AASDH	AB019437.11	AB019437.15	AB019437.19	AB019437.23	AB019437.30	AB019437.8	AB019438.29	ABCA1	ABCA2	ABCB6	ABCB8	ABCB9	ABCC1	ABCD1	ABCE1	ABCF1	ABCF3	ABCG1	ABHD13	ABHD15	ABHD2	ABHD3	ABHD4	ABHD5	ABI1	ABLIM1	ABR	ABT1	AC000068.1
EZH2_target_ChIP	MARCH2	MARCH4	MARCH5	MARCH6	MARCH9	MARCH10	SEPT10	AAK1	AATF	ABCC3	ABCC4	ABCG4	ABHD14B	ABHD5	ABHD7	ABLIM2	ACAA2	ACCN1	ACCN2	ACHE	ACSL6	ACSS2	ACTN1	ACVR1	ACVR2A	ADAM23	ADAMTS1	ADAMTS15	ADAMTS19	ADAMTS2	ADAMTS3	ADAMTS5	ADAMTS8	ADCY1	ADCY4	ADCYAP1	ADM	ADRA1A	ADRB1	ADRBK2	AFAP1L1	AFF3	AGPAT9	AGXT2L1	AHNAK	AK1	AK3L1	ALDH1A2	ALK
denovobivGenes	OMA1	PRKCZ	TMCO4	DOCK7	DPYD	ARHGEF11	HHAT	SKI	KIF1B	TNFRSF1B	PINK1	LUZP1	AHDC1	RNF11	PPAP2B	LOC100131060	ATG4C	PDE4B	KCNA3	FAM46C	POLR3GL	ATP8B2	UCK2	FAM78B	C1orf9	FAM5B	LAMC1	RGL1	NR5A2	TMEM63A	GALNT2	B3GALNT2	OPN3	AGRN	C1orf159	SSU72	PANK4	LOC388588	RPL22	KLHL21	CLSTN1	FBXO2	FBXO44	EFHD2	RCC2	NBL1	ID3	LDLRAP1	ZNF593
NB_GCB_Progression_All_Genes_RPKM_enhancer_gain_plus3_plus4	ACSL5	ADORA3	AEN	AGFG2	AK5	ALPL	ANAPC4	ANKRD1	ANKRD13A	ANKRD33B	ANP32B	ANUBL1	ARL8B	ARMC9	ARRDC4	ASB13	ASXL1	ATL2	ATP5L	ATXN1	ATXN10	B3GALTL	B3GNTL1	B4GALT5	BAIAP2L1	BATF	BIK	BRWD1	BTBD12	BUB3	C10orf18	C10orf99	C14orf181	C17orf85	C18orf45	C1orf162	C20orf196	C3orf20	C4orf52	C7orf10	C8orf46	CAB39	CADM1	CADPS	CAMK4	CAMKK2	CAMTA1	CARM1	CCDC48
NB_GCB_Progression_All_Genes_RPKM_enhancer_loss_minus3_minus4	ABAT	ABCB1	ACBD3	ACTRT2	ADAM10	ADAMTS13	ADD1	ADK	AFF1	AGBL4	AGPAT5	AGRP	AGTPBP1	ALS2CR11	AMN1	AMPD3	AMPH	ANKRD55	ANKRD6	ANO3	ANP32A	ANXA3	AP1B1	AP1M1	AP3B1	ARGLU1	ARHGAP15	ARHGAP22	ARHGAP26	ARHGAP5	ARHGEF18	ARHGEF3	ARHGEF6	ARID4B	ASAM	ASGR2	ASPH	ATF3	ATF7IP2	ATG4C	ATP10D	ATP6V0E1	ATP6V1G3	B4GALT1	BANK1	BCL2	BCYRN1	BEND5	BLNK
NB_GCB_Progression_All_Genes_RPKM_minus2	AACS	AAK1	ABAT	ABCB1	ABCC5	ABCD4	ABHD10	ABI1	ACADM	ACBD3	ACOT9	ACSM1	ACTBL2	ACTL7B	ACTN4	ACTRT2	ACVR1	ACVR1B	ACYP2	ADAMTS13	ADAP2	ADCY7	ADCY9	ADK	ADORA2A	ADPGK	AES	AGPAT5	AGRP	AGTPBP1	AHCYL2	AHNAK	AHRR	AIFM3	AK1	AKAP6	AKAP8	AKIRIN2	AKT3	ALDH3B1	ALG8	ALPK1	ALPK2	ALS2CR11	ALS2CR4	AMZ1	ANGPT1	ANGPT2	ANKMY1
NB_GCB_Progression_All_Genes_RPKM_minus5	ADAM10	ADD1	AGBL4	AKNA	AMN1	AMPD3	ANKRD11	ANKRD55	AP1M1	AP3B1	ARGLU1	ARHGAP22	ARHGEF18	ARHGEF3	ARID4B	ARMC2	ASGR2	ATG4C	ATP10D	ATP6V0C	ATP6V1G3	B4GALT1	BCL11A	BEND5	BHLHE40	BICD2	BLNK	BOD1	BTG1	C11orf53	C12orf35	C12orf51	C14orf166B	C14orf182	C14orf183	C15orf57	C18orf20	C1orf201	C1QTNF7	C20orf72	C2orf85	C4orf34	CARD11	CARS2	CCND2	CCR6	CCS	CD47	CD6
NB_GCB_Progression_All_Genes_RPKM_minus10	ADARB1	ADD3	AFF1	AIM1	AMPH	ANXA3	ARHGAP15	ARID1B	BACH2	BANK1	BCL2	BLK	BTLA	C7orf58	CAMK2D	CDC73	CLLU1OS	CREB3L2	CREBBP	CSGALNACT1	DPH5	DUSP22	ELOVL5	ENTHD1	ETS1	EZR	FBRSL1	FBXO15	FOXO1	FOXP1	GAS7	GPR174	GRB2	HMBOX1	IFNGR1	IKZF3	JARID2	KHDRBS2	LCLAT1	MACROD2	MAP3K1	MAPKAP1	MARCH3	MEF2C	MGAT5	MOBKL2B	MRVI1	MSI2	MSN
NB_GCB_Progression_All_Genes_RPKM_minus2.to.plus2	AADAC	AADAT	AARS	AASDH	AASS	ABCA1	ABCA12	ABCA2	ABCA4	ABCA6	ABCA8	ABCA9	ABCB11	ABCB4	ABCB9	ABCC2	ABCD2	ABCD3	ABHD12	ABHD12B	ABHD15	ABHD2	ABHD6	ABL1	ABLIM2	ABLIM3	ABO	ABP1	ABR	ABRA	ABT1	ACACA	ACACB	ACAP1	ACAP2	ACAP3	ACBD5	ACBD6	ACCN1	ACER2	ACER3	ACHE	ACMSD	ACO1	ACO2	ACOT11	ACOT7	ACOT8	ACOX3
NB_GCB_Progression_All_Genes_RPKM_plus10	ACSL5	ADORA3	AEN	AGFG2	AK5	ALPL	ANAPC4	ANKRD1	ANKRD13A	ANKRD33B	ANP32B	ANUBL1	ARL8B	ARMC9	ARRDC4	ASB13	ASXL1	ATL2	ATP5L	ATXN1	ATXN10	B3GALTL	B3GNTL1	B4GALT5	BAIAP2L1	BATF	BIK	BRWD1	BTBD12	BUB3	C10orf18	C10orf99	C14orf181	C17orf85	C18orf45	C1orf162	C20orf196	C3orf20	C4orf52	C7orf10	C8orf46	CAB39	CADM1	CADPS	CAMK4	CAMKK2	CAMTA1	CARM1	CCDC48
NB_GCB_Progression_All_Genes_RPKM_plus5	ADA	AEN	AFF2	AFF3	AGFG1	AGFG2	AGR3	AKAP11	ALCAM	ALPL	AMICA1	ANKRD13A	ANKRD16	ANKS1B	ANUBL1	AP1S3	APBB1IP	APBB2	ARID5B	ARL8B	ARMC9	ARSB	ASB13	ASB2	ASTN2	ATXN3L	AUH	AUTS2	AZIN1	B3GNTL1	BASP1	BATF	BCAS4	BCAT1	BCL2A1	BCL7A	BCOR	BET1	BFSP2	BRWD1	BTBD12	BTG2	C12orf77	C16orf75	C1orf162	C20orf196	C21orf7	C4orf22	C4orf52
NB_GCB_Progression_All_Genes_RPKM_plus2	A4GALT	ABCA10	ABCC1	ABCC12	ABCC4	ABCD1	ABCG1	ABHD3	ABHD5	ABI3	ABL2	ABLIM1	ABTB2	ACAD10	ACAD11	ACOXL	ACSL1	ACSL3	ACSL4	ACSL5	ACVR2A	ADAM17	ADAM28	ADAM29	ADAMDEC1	ADAMTS19	ADAMTSL3	ADARB2	ADCK2	ADCY3	ADORA3	ADRA2C	AEBP1	AEBP2	AFAP1L1	AFMID	AGAP1	AGK	AICDA	AIP	AJAP1	AK5	AKAP1	ALDH1L2	ALDH2	ALDH5A1	ALDH8A1	ALK	ALOX12P2
GCB_BCL6SMRT_Distal_Enhancer	ABR	ACP5	ADAM19	ADAM28	ADRB2	AKAP11	AKIRIN2	ALCAM	ALOX5AP	AMN	AMZ2P1	ANAPC4	ANKRD46	ANXA3	ANXA4	AP1M1	AP1S2	APCDD1	ARFGEF2	ARHGAP25	ARID5B	ARL11	ARL4C	ARL5A	ARRDC2	ARRDC4	ARSB	ATF7IP	ATP10A	ATP5O	ATP6V1G1	ATPIF1	B3GALTL	B4GALT5	BACH2	BASP1	BATF3	BCAR3	BCL11A	BCL2A1	BCL2L11	BCL6	BCOR	BEND4	BMP2K	BMP4	BOD1P	BTN3A2	BUB3
GCB_bivalentProm_genes	NBPF1	OMA1	PRKCZ	TMCO4	ZFYVE9	DOCK7	LOC100132618	DPYD	SLC22A15	PDE4DIP	ARHGEF11	NOS1AP	KLHL20	HHAT	C1orf96	GNG4	SKI	WRAP73	ERRFI1	KIF1B	TNFRSF1B	IFFO2	PINK1	LUZP1	C1orf130	MAN1C1	AHDC1	PTPRU	BAI2	HIVEP3	RNF220	ZSWIM5	RNF11	SCP2	PPAP2B	LOC100131060	NFIA	ATG4C	AK4	LEPROT	LEPR	PDE4B	PTGER3	SAMD13	TTLL7	DDAH1	TGFBR3	FNBP1L	SORT1
GC_termDiff_Genes	ABHD14A	ACOXL	ACTBL2	ACTC1	ADI1	ADM	ADM2	AEBP1	ALDH1L2	ALG5	ALKBH7	AMY1A	ANAPC11	ANKRD20A4	ANKRD33	APOA1BP	APOL6	AQP3	AQP9	ARF4	ARFGAP3	ARID3A	ARL1	ASNA1	ATP10D	ATP5J2	ATP5L2	ATP6V0C	ATP8B2	B2M	B3GALNT1	B9D1	BCKDHA	BCL2L1	BCL7C	BDKRB2	BEX5	BHLHA15	BHLHE41	BIRC5	BMP6	BRP44L	BTN3A2	C11orf10	C12orf23	C12orf57	C15orf24	C15orf39	C15orf48
Ly1_BCL6RD2mut_upreg	AACSP1	ABCA12	ABCB4	ABCD2	ABCD4	ABHD15	ABHD8	ACAD11	ACAP1	ACBD7	ACOXL	ACRV1	ACSF2	ACSM3	ACSS1	ACTA1	ACTN1	ACVR1	ADAM1	ADAMTS6	ADAMTSL4	ADARB1	ADARB2-AS1	ADD2	ADHFE1	ADM2	ADORA3	AEBP1	AES	AFAP1	AFAP1L2	AFF1	AGBL5	AGER	AGPAT4	AHDC1	AHNAK	AIDA	AK1	AKAP12	AKD1	AKIRIN2	AKT3	ALDH4A1	AMH	AMN	AMT	AMZ2P1	ANKHD1-EIF4EBP3
Ly1_siBCL6_48h_upreg	ZNF559	SLC25A30	LFNG	SLC25A34	LOC338799	HDAC9	ZWINT	TMEM79	PTGER4	CLOCK	SKA3	PEMT	LRRC43	DOCK10	DOCK11	ARHGAP31	TMCC1	ARHGAP33	CD248	T	ZNF569	UNC79	CEACAM21	IFITM2	TMEM8B	ARHGAP5	ARHGAP9	AFAP1L2	TGFBR1	TGFBR2	TGFBR3	MAN1C1	DKFZP586I1420	MSH5-SAPCD1	ARHGAP42	CSRP2	KLHDC8B	GNG2	GNG4	ZNF575	LOC100132247	HIRIP3	TMEM99	LRRC61	LYSMD3	SHISA3	SNX9	UBALD2	DDX12P
GCB.DLBCL_1085_intersectSignature	ABCB1	ABCB6	ABCB9	ABHD3	ABHD4	ABLIM1	ACPT	ACVR2A	ADAM17	ADIPOR1	ADIPOR2	ADM	ADM2	AFF4	AFTPH	AGPAT9	AHDC1	AHSA1	AKAP10	AKAP8L	AKD1	AKIRIN1	AKIRIN2	AKT1S1	ALKBH1	AMBP	AMFR	AMY2B	ANKRD11	ANKRD12	ANKRD30BL	ANKRD37	ANKRD50	AOC2	AOC3	APOE	ARHGAP5	ARHGEF12	ARIH1	ARL6IP1	ARL8A	ARL8B	ARRDC2	ARRDC3	ASAH1	ASH1L	ASNS	ASPRV1	ASXL2
ly1.promoter.BCL6.all.3140	MARCH1	MARCH5	MARCH6	SEPT7	SEPT9	SEP15	A4GALT	AAGAB	AAK1	AASDHPPT	ABCA1	ABCB4	ABCB9	ABCG1	ABHD10	ABHD12	ABHD13	ABHD15	ABHD3	ABHD4	ABHD5	ABLIM1	ABR	ACACA	ACAT2	ACBD4	ACIN1	ACN9	ACOT7	ACP2	ACPP	ACSF2	ACSF3	ACSL3	ACSL4	ACSS1	ACTR1A	ACTR2	ACTR3	ACTR3C	ACY3	ACYP1	ADAM10	ADAM22	ADAMTS13	ADAMTS6	ADAR	ADAT2	ADCK4
ly1.promoter.BCL6.SMRT.BCOR.341	ABCB4	ABR	ACSF3	ACY3	ADNP	AFF1	AIMP1	AKAP2	ALLC	AP4E1	APBB1IP	APOL6	ARHGAP15	ARHGAP31	ARHGEF7	ARID3A	ARL1	ARMC5	ARMC8	ARPC5L	ARRB2	ARRDC3	ATP2A3	ATP5G1	ATP6V0A1	B2M	B3GNT2	BANK1	BCAS4	BCL6	BIRC3	BRI3BP	BRPF1	C12orf35	C12orf4	C12orf57	C12orf77	C15orf62	C16orf7	C17orf62	C17orf91	C18orf1	C3orf26	C3orf37	C9orf46	CAPG	CASP8	CCDC88C	CCM2
ly1.promoter.BCL6-SMRT.all.451	MARCH1	ABCB4	ABHD3	ABR	ACSF3	ACY3	ADNP	AFF1	AIMP1	AKAP2	ALG5	ALLC	AP4E1	APBB1IP	APOL6	ARHGAP15	ARHGAP25	ARHGAP31	ARHGDIB	ARHGEF2	ARHGEF7	ARID3A	ARL1	ARL6IP5	ARMC5	ARMC8	ARPC2	ARPC5L	ARRB2	ARRDC3	ATP2A3	ATP5G1	ATP6V0A1	ATP6V1C1	B2M	B3GNT2	B3GNT7	BANK1	BCAS4	BCL6	BIRC3	BRI3BP	BRPF1	BST2	BZW2	C12orf35	C12orf4	C12orf57	C12orf77
ly1.promoter.BCL6-BCOR.all.2142	MARCH5	MARCH6	SEPT7	SEPT9	SEP15	A4GALT	AAGAB	AAK1	ABCA1	ABCB4	ABHD10	ABHD12	ABHD13	ABHD15	ABHD5	ABLIM1	ABR	ACAT2	ACBD4	ACIN1	ACN9	ACOT7	ACP2	ACSF2	ACSF3	ACSL3	ACSS1	ACTR1A	ACTR2	ACTR3C	ACY3	ADAM10	ADAM22	ADAMTS6	ADAR	ADAT2	ADCK5	ADIPOR2	ADNP	ADORA2A	ADPRHL1	ADSSL1	AEBP1	AFF1	AFF3	AFG3L2	AGBL3	AGPAT5	AHI1
ly1.promoter.BCL6-BCOR.only.1783	MARCH5	MARCH6	SEPT7	SEPT9	SEP15	A4GALT	AAGAB	AAK1	ABCA1	ABHD10	ABHD12	ABHD13	ABHD15	ABHD5	ABLIM1	ACAT2	ACBD4	ACIN1	ACN9	ACOT7	ACP2	ACSF2	ACSL3	ACSS1	ACTR1A	ACTR2	ACTR3C	ADAM10	ADAM22	ADAMTS6	ADAR	ADAT2	ADCK5	ADIPOR2	ADORA2A	ADPRHL1	ADSSL1	AEBP1	AFF3	AFG3L2	AGBL3	AGPAT5	AHI1	AHSA2	AIM1	AK3L1	AKIRIN1	ALDH5A1	ALDH9A1
ly1.promoter.BCL6-SMRT.only.93	MARCH1	ABHD3	ALG5	ARHGDIB	ARHGEF2	ARPC2	ATP6V1C1	B3GNT7	BST2	BZW2	C17orf99	C19orf61	CCL5	CD180	CD53	CD68	CDK14	CHMP7	CREM	CXCR5	CXCR7	CYTIP	DCLRE1A	DMD	DNAJC10	E2F1	EFCAB5	EVI2B	EXOSC8	FCRL2	FMO4	GCET2	GLT8D1	GPR183	GTSF1L	GUF1	GZF1	HEMGN	HSDL2	ICAM2	IFRD1	IGJ	IL10	IL4I1	ITGAL	JMJD1C	KCNJ16	KMO	LOC100133315
ly1.promoter.BCL6.alone.906	AASDHPPT	ABCB9	ABCG1	ABHD4	ACACA	ACPP	ACSL4	ACTR3	ACYP1	ADAMTS13	ADCK4	ADORA3	AFP	AHCYL2	AIFM1	AKAP12	AKT1S1	ALG12	ALG14	ALG8	ALKBH7	ALOX5AP	ALOXE3	ALS2CR8	ANGPTL6	ANK3	ANKMY2	ANKRD13A	ANKRD37	AP1G1	AP1S1	AP3S1	ARHGAP1	ARHGAP17	ARHGAP27	ARHGEF38	ARID4A	ARID4B	ARL5A	ARL5B	ARL6IP6	ARL8A	ARMC1	ARPC4	ARRDC5	ASAH1	ASB2	ASH1L	ASNA1
ly1.enhancer.DISTAL.BCL6-SMRT.DRE.553	ABR	ACTR3	ACYP2	ADAM28	ADM	ADO	ADRB1	ADRB2	AGPAT5	AGR3	AGRP	AHI1	AKAP11	ALG9	AMPD3	ANAPC1	ANKRD44	ANKRD46	ANXA1	ARAP2	ARHGAP20	ARHGAP22	ARHGAP25	ARHGEF18	ARHGEF38	ARID1B	ARID5B	ARL4C	ARL5A	ARPP21	ASAP1	ASB2	ASCC3	ATF7IP	ATF7IP2	ATP6V1G3	ATPIF1	ATXN3L	AZIN1	B3GNT2	BACH2	BASP1	BAT2L1	BCAR3	BCAS1	BCL11A	BCL2A1	BCL2L11	BCL6
ly1.enhancer.INTRONIC.BCL6-SMRT.DRE.807	MARCH1	SEPT6	SEPT9	ABCB1	ABCC1	ABCC4	ABCC5	ABCG1	ABHD12B	ABI1	ABLIM1	ABR	ACBD3	ACOXL	ADA	ADAM17	ADAMTS19	ADARB1	ADARB2	ADD3	AFAP1	AFF1	AFF2	AFF3	AHRR	AIM1	AIM2	AKAP13	AKAP2	ALDH5A1	ALLC	ALOX5AP	AMPH	ANAPC16	ANK1	ANK3	ANKRD11	ANKRD28	ANKRD44	ANKS1A	ANKS1B	AP1B1	AP1S3	AP2B1	APBB1IP	ARFIP1	ARHGAP10	ARHGAP18	ARHGAP24
ly1.enhancer.INTRONIC.DISTAL.BCL6-SMRT.DRE.1275	MARCH1	SEPT6	SEPT9	ABCB1	ABCC1	ABCC4	ABCC5	ABCG1	ABHD12B	ABI1	ABLIM1	ABR	ACBD3	ACOXL	ADA	ADAM17	ADAMTS19	ADARB1	ADARB2	ADD3	AFAP1	AFF1	AFF2	AFF3	AHRR	AIM1	AIM2	AKAP13	AKAP2	ALDH5A1	ALLC	ALOX5AP	AMPH	ANAPC16	ANK1	ANK3	ANKRD11	ANKRD28	ANKRD44	ANKS1A	ANKS1B	AP1B1	AP1S3	AP2B1	APBB1IP	ARFIP1	ARHGAP10	ARHGAP18	ARHGAP24
GCB.promoter.BCL6.all.5541	MARCH1	MARCH3	MARCH5	MARCH6	MARCH7	MARCH8	SEPT2	SEPT6	SEPT7	SEPT11	SEP15	A4GALT	AAAS	AAK1	AAMP	AARS	AARS2	AASDHPPT	ABCA1	ABCA5	ABCA7	ABCB10	ABCB7	ABCB9	ABCF2	ABCG1	ABHD10	ABHD12	ABHD13	ABHD15	ABHD3	ABHD5	ABI1	ABLIM1	ABLIM2	ABR	ABT1	ABTB2	ACAA1	ACAD9	ACADSB	ACAP2	ACBD4	ACBD5	ACBD6	ACIN1	ACN9	ACOT13	ACOT7
GCB.promoter.BCL6.SMRT.BCOR.1306	MARCH1	MARCH6	MARCH8	A4GALT	ABCA1	ABCB9	ABHD13	ABLIM1	ABR	ACBD5	ACIN1	ACOT13	ACTA2	ACTR3	ACY3	ADAM8	ADAT2	ADNP	ADORA2A	AFF1	AHI1	AKAP10	AKAP13	ALDOA	ALG14	ALG2	ALG5	AMZ2P1	ANKRD11	ANKRD13D	ANKRD33B	AP1S2	AP1S3	AP4B1	AP4E1	APBB1IP	APH1A	APOB48R	ARF4	ARF6	ARFRP1	ARHGAP15	ARHGAP17	ARHGAP24	ARHGAP25	ARHGAP4	ARHGEF7	ARID1A	ARID2
GCB.promoter.BCL6-SMRT.all.1306	MARCH1	MARCH6	MARCH8	A4GALT	ABCA1	ABCB9	ABHD13	ABLIM1	ABR	ACBD5	ACIN1	ACOT13	ACTA2	ACTR3	ACY3	ADAM8	ADAT2	ADNP	ADORA2A	AFF1	AHI1	AKAP10	AKAP13	ALDOA	ALG14	ALG2	ALG5	AMZ2P1	ANKRD11	ANKRD13D	ANKRD33B	AP1S2	AP1S3	AP4B1	AP4E1	APBB1IP	APH1A	APOB48R	ARF4	ARF6	ARFRP1	ARHGAP15	ARHGAP17	ARHGAP24	ARHGAP25	ARHGAP4	ARHGEF7	ARID1A	ARID2
GCB.promoter.BCL6-BCOR.all.5451	MARCH1	MARCH3	MARCH5	MARCH6	MARCH7	MARCH8	SEPT2	SEPT6	SEPT7	SEPT11	SEP15	A4GALT	AAAS	AAK1	AAMP	AARS	AARS2	AASDHPPT	ABCA1	ABCA5	ABCA7	ABCB10	ABCB7	ABCB9	ABCF2	ABCG1	ABHD10	ABHD12	ABHD13	ABHD15	ABHD3	ABHD5	ABI1	ABLIM1	ABLIM2	ABR	ABT1	ABTB2	ACAA1	ACAD9	ACADSB	ACAP2	ACBD4	ACBD5	ACBD6	ACIN1	ACN9	ACOT13	ACOT7
GCB.promoter.BCL6-BCOR.only.4145	MARCH3	MARCH5	MARCH7	SEPT2	SEPT6	SEPT7	SEPT11	SEP15	AAAS	AAK1	AAMP	AARS	AARS2	AASDHPPT	ABCA5	ABCA7	ABCB10	ABCB7	ABCF2	ABCG1	ABHD10	ABHD12	ABHD15	ABHD3	ABHD5	ABI1	ABLIM2	ABT1	ABTB2	ACAA1	ACAD9	ACADSB	ACAP2	ACBD4	ACBD6	ACN9	ACOT7	ACOT8	ACP2	ACP6	ACSL3	ACSL4	ACSS1	ACTB	ACTG1	ACTR1A	ACTR2	ACTR3C	ACVR2A
GCB.promoter.BCL6.alone.106	AICDA	AIM2	AKT1S1	ARFGEF2	ARL6IP5	BCL9	BTBD19	C17orf101	C19orf54	C1orf174	C21orf58	CAMP	CASP8AP2	CCDC23	CCL27	CD68	CDKN3	CLECL1	CLYBL	COX8A	DDX25	DHDDS	EIF1AY	EIF4A1	ERMAP	EVI2B	FAM118B	FAM167B	FAM71D	FBXO8	FCRL3	FCRL4	FIZ1	GLTSCR2	GOLGA1	GPR82	GRIPAP1	GUK1	HAVCR2	HEXDC	IFI35	IL23A	ISG20	ISG20L2	KATNB1	KDM4B	KIAA0907	KIAA1712	LARP1
LPC_LSC_52_Alizadeh_JAMA_10	ABCC2	ANLN	BIRC3	C13orf3	CCDC48	CCL5	CCNA1	CD34	CD38	CLC	CPA3	CSTA	DDX53	DLGAP5	EBF3	EVI2A	FAIM3	FBXO21	GIMAP2	GIMAP6	GIMAP7	GUCY1A3	HECA	HLF	HOPX	HSPC159	ICAM1	IL1F8	KIAA0101	LOC100128550	LOC727893	LTB	MEF2C	MMRN1	MND1	MS4A3	OLFM4	PCDHGC3	PION	RBPMS	RNASE2	RNASE3	SETBP1	SH3BP5	SLC37A3	SLC38A1	STAR	TMEM200A	UBE2T
LSC_42_Dick_NatMed_11	ABCG1	ARFGEF1	ARL3	ARPP-19	ATP1B1	C16orf5	C17orf86	C2CD2	CLN5	CRKRS	CSDE1	EIF2S3	FAM119B	FLJ13197	FRMD4B	GPR56	IQGAP2	LOC552889	LRRC61	LRRC8B	MAP3K7	NAB1	NF1	NPAL2	PAQR6	PLCH1	PNPLA4	PPIG	PPP1R10	PTCD2	RABGAP1	RBPMS	SETDB1	SLC9A7	TGIF2	TRAF3IP2	UBR5	VGLL4	ZBTB39	ZFP30	ZNF304	ZNF500
HSC_120_Dick_NatMed_11	ABCB1	ABCB4	ALCAM	ANK3	ASXL1	ATP8B4	BAALC	BCL11A	BEX1	BTBD11	C13orf15	C20orf111	C20orf59	C2orf69	C5orf23	CACNB2	CALN1	CD109	CFH	COL5A1	CRHBP	CRIM1	CYLD	DACH1	DAPK1	DDX5	DLK1	DNAJB9	DRAM	DST	DUSP6	EIF5	ELK3	EPC1	ERG	EVI1	FAM169A	FAM3C	FBXL11	FGD5	FGFR1	FLT3	FNBP1	FOXO1	FRMD4B	GCNT2	GNL1	GPR126	GUCY1A3
IKAROS_target_ChIPseq_Young_Ebert_Cell_11	MARCH4	SEPT6	AAAS	ACOX1	ACSL6	ACTG1	ACTL6A	ACTN4	ACVR1	ADAM10	ADAM17	ADAM9	ADAMTS20	ADAP1	ADHFE1	ADSL	AFAP1	AGFG1	AGGF1	AGPAT2	AGRN	AIMP1	AIMP2	ALOX5	ANAPC5	ANKMY1	ANKRD49	ANPEP	AP2A2	AP4M1	APAF1	APEH	APPBP2	AQR	ARAP1	ARHGAP1	ARHGAP4	ARHGAP5	ARHGEF17	ARHGEF18	ARL1	ARL2	ARPP19	ARRB1	ARSJ	ASH1L	ATF2	ATF5	ATIC
MEIS1_target_ChIPseq_Ebert_Cell_11	AARSD1	ABCC1	ABI2	ADAMTSL3	ADORA3	ADSL	AEN	AFF1	AGPAT1	AHCY	AHR	AKAP7	AKAP9	AMPD3	AMZ2	AP2A2	APIP	APOBEC1	APOLD1	ARF4	ARHGAP15	ARHGAP17	ARHGAP22	ARHGAP24	ARHGAP25	ARHGAP26	ARHGEF3	ARHGEF6	ARID5B	ARPC3	ARPP21	ASAP1	ASTN2	ATAD2B	ATF7IP2	ATP11B	ATP5S	ATP6V0A1	ATXN10	ATXN7	AVL9	B4GALT1	BAALC	BACH2	BAZ2B	BBS1	BCAT1	BCL11A	BCL2A1
TAL1_target_ChIPseq_Ebert_Cell_11	AGFG1	ANKRD55	ANPEP	ATG9A	BCAR3	BNIP3L	C1D	C1orf38	CALM1	CBFA2T3	CCND3	CD226	CD69	CDC27	DAAM1	DCP1A	ELMO1	ETS1	ETV5	FLT1	GLG1	GNA12	GNG12	GPHN	HHEX	IL21R	IQGAP2	ITPR1	JARID2	KIF5C	LIMS1	LPP	LYL1	MAN2A2	MAP2K5	MAPK14	NFATC1	PARN	PIK3C2B	PLA2G6	PMF1	PRR5	PTPRD	PTTG1IP	RGS10	RPS6KA2	RUNX1	SCAMP2	SH2B3
PU.1_target_ChIPseq_Ebert_Cell_11	MARCH1	MARCH2	MARCH5	A2M	AAAS	AAK1	AARSD1	ABCA1	ABCA2	ABCA7	ABCB1	ABCB7	ABCC1	ABCC4	ABCD2	ABCD3	ABCD4	ABCE1	ABCG1	ABHD2	ABI1	ABI2	ABLIM1	ABR	ABT1	ACAA1	ACACA	ACAP2	ACOX3	ACP1	ACP2	ACSL1	ACSL5	ACSL6	ACSM3	ACTA2	ACTB	ACTL6A	ACTN1	ACTN4	ACTR2	ACTR3	ACVR1B	ACYP2	ADA	ADAM10	ADAM19	ADAM28	ADAMTS3
PU.1_NB_prom	MARCH1	MARCH6	MARCH8	SEPT1	SEPT15	AATF	ABCA7	ABCB4	ABCB7	ABCD2	ABCD4	ABCE1	ABCG1	ABHD11	ABHD8	ABI1	ABI3	ABL1	ABL2	ABT1	ACAA1	ACAA2	ACAP2	ACBD3	ACBD5	ACCS	ACN9	ACO2	ACOT8	ACOT9	ACP2	ACP5	ACSL4	ACSL5	ACSM3	ACTA2	ACTB	ACTN4	ACTR2	ACTR3	ACY3	ACYP2	ADAL	ADAM28	ADAP2	ADAR	ADARB2	ADAT3	ADCK2
PU.1_NB_enhancer	MARCH1	MARCH3	MARCH6	MARCH7	MARCH8	MARCH10	SEPT1	SEPT2	SEPT6	SEPT7	SEPT9	SEPT15	DEC1	A2BP1	A2M	A4GALT	AAA1	AACS	AAK1	ABAT	ABCA1	ABCA10	ABCA4	ABCA5	ABCA6	ABCA8	ABCA9	ABCB1	ABCB11	ABCB4	ABCC1	ABCC11	ABCC13	ABCC4	ABCC8	ABCD1	ABCD2	ABCD4	ABCE1	ABCG1	ABHD11	ABHD12	ABHD12B	ABHD15	ABHD2	ABI1	ABI3	ABL1	ABL2
PU.1_NB_all	MARCH1	MARCH3	MARCH6	MARCH7	MARCH8	MARCH10	SEPT1	SEPT2	SEPT6	SEPT7	SEPT9	SEPT15	DEC1	A2BP1	A2M	A4GALT	AAA1	AACS	AAK1	AATF	ABAT	ABCA1	ABCA10	ABCA4	ABCA5	ABCA6	ABCA7	ABCA8	ABCA9	ABCB1	ABCB11	ABCB4	ABCB7	ABCC1	ABCC11	ABCC13	ABCC4	ABCC8	ABCD1	ABCD2	ABCD4	ABCE1	ABCG1	ABHD11	ABHD12	ABHD12B	ABHD15	ABHD2	ABHD8
PU.1_CB_prom	MARCH6	SEPT1	A4GALT	AAGAB	AATF	ABCA7	ABCB7	ABCC1	ABCD2	ABCD4	ABCE1	ABCG1	ABHD11	ABI1	ABI3	ABL1	ABL2	ABR	ABT1	ACAA1	ACAA2	ACAD10	ACAP2	ACBD5	ACCS	ACN9	ACOT4	ACOT8	ACP2	ACPP	ACSL4	ACSL5	ACSM3	ACTA2	ACTN4	ACTR2	ACTR3	ACY3	ACYP2	ADAL	ADAM28	ADAMTS13	ADAP2	ADAT3	ADCK2	ADORA2A	ADORA3	ADPGK	ADPRH
PU.1_CB_enhancer	MARCH1	MARCH6	MARCH8	MARCH10	SEPT1	SEPT2	SEPT6	SEPT9	SEPT15	DEC1	A4GALT	AAA1	AACS	AAGAB	AAK1	ABAT	ABCA1	ABCA10	ABCA4	ABCA6	ABCA8	ABCB1	ABCB11	ABCB4	ABCC1	ABCC11	ABCC13	ABCC4	ABCC8	ABCD1	ABCD2	ABCD4	ABCE1	ABCG1	ABHD11	ABHD12	ABHD12B	ABHD2	ABI1	ABI3	ABL1	ABL2	ABLIM1	ABP1	ABR	ABT1	ABTB2	ACAD11	ACAP2
PU.1_CB_all	MARCH1	MARCH6	MARCH8	MARCH10	SEPT1	SEPT2	SEPT6	SEPT9	SEPT15	DEC1	A4GALT	AAA1	AACS	AAGAB	AAK1	AATF	ABAT	ABCA1	ABCA10	ABCA4	ABCA6	ABCA7	ABCA8	ABCB1	ABCB11	ABCB4	ABCB7	ABCC1	ABCC11	ABCC13	ABCC4	ABCC8	ABCD1	ABCD2	ABCD4	ABCE1	ABCG1	ABHD11	ABHD12	ABHD12B	ABHD15	ABHD2	ABI1	ABI3	ABL1	ABL2	ABLIM1	ABP1	ABR
IKZF1_CB_prom	AAAS	ABCB10	ABHD13	ABR	ACBD4	ACTL6A	ACTR3	ACVR1	ACY3	ADAM10	ADORA2A	ADSL	AGFG1	AHCYL2	AHSA1	AIDA	AIM1	AMZ2P1	ANGEL2	ANKRD10	ANKRD16	ANKRD17	ANKRD40	AP1S3	AP4B1	APBB2	APH1A	AQR	ARHGAP1	ARHGEF1	ARHGEF2	ARHGEF7	ARID1A	ARL2	ARPC5	ARPP19	ATAD1	ATAD2	ATAD2B	ATAD3A	ATF1	ATP5G1	ATP5G2	ATXN2L	AUP1	B3GALNT2	BAZ1A	BEND3	BEST4
IKZF1_CB_enhancer	SEPT6	SEPT9	A4GALT	ABCA1	ABR	ACSF3	ACY3	ADCY7	ADORA2A	AFAP1	AGPAT3	AKAP13	AKNA	AKR1A1	ANAPC16	ANGEL2	ANKRD33B	ANKRD9	AP1M1	AP1S3	APBB2	ARFGAP3	ARHGAP31	ARHGEF18	ARHGEF7	ARID1A	ARRDC2	ATP10A	ATXN2L	BAD	BAZ1A	BCAS1	BCOR	BCR	BEST4	BID	BIK	BLM	BRI3BP	BTG2	C10orf67	C14orf181	C16orf74	C1orf220	C1orf58	C1orf63	C1RL	C20orf132	C20orf166
IKZF1_CB_all	SEPT6	SEPT9	A4GALT	AAAS	ABCA1	ABCB10	ABHD13	ABR	ACBD4	ACRBP	ACSF3	ACTL6A	ACTR3	ACVR1	ACY3	ADAM10	ADCY7	ADORA2A	ADSL	AFAP1	AGFG1	AGPAT3	AHCYL2	AHSA1	AIDA	AIFM3	AIM1	AKAP13	AKNA	AKR1A1	AMZ2P1	ANAPC16	ANGEL2	ANKRD10	ANKRD16	ANKRD17	ANKRD33B	ANKRD40	ANKRD9	AP1M1	AP1S3	AP4B1	APBB2	APH1A	APOF	AQR	ARFGAP3	ARHGAP1	ARHGAP31
CTCF_NB_prom	MARCH2	MARCH5	MARCH7	MARCH9	SEPT9	AAAS	AANAT	AARS2	ABCA1	ABCA17P	ABCA2	ABCA3	ABCB10	ABCC5	ABCD4	ABHD14A	ABHD14B	ABHD15	ABHD3	ABI1	ABLIM3	ABR	ABT1	ACAD11	ACAT1	ACBD4	ACBD7	ACCN2	ACCS	ACHE	ACOT13	ACPL2	ACSM1	ACTB	ACTL6A	ACTR1A	ACVR1C	ACY1	ADAM15	ADAMTS16	ADAMTS17	ADAMTS7	ADAMTSL2	ADAMTSL5	ADCK5	ADCY4	ADNP	ADPRHL2	ADRA1B
CTCF_NB_enhancer	MARCH1	MARCH8	MARCH9	MARCH10	SEPT5	SEPT6	SEPT7	SEPT9	SEPT10	SEPT15	A2BP1	A2LD1	A2ML1	AAA1	AACS	AADAC	AADACL4	AADAT	AAK1	AANAT	AARS2	AARSD1	AASDHPPT	AATF	AATK	ABAT	ABCA1	ABCA10	ABCA17P	ABCA4	ABCB1	ABCB11	ABCB4	ABCB5	ABCB6	ABCB9	ABCC1	ABCC10	ABCC11	ABCC12	ABCC13	ABCC2	ABCC4	ABCC5	ABCC6	ABCD3	ABCD4	ABCG1	ABHD10
CTCF_NB_all	MARCH1	MARCH2	MARCH5	MARCH7	MARCH8	MARCH9	MARCH10	SEPT5	SEPT6	SEPT7	SEPT9	SEPT10	SEPT15	A2BP1	A2LD1	A2ML1	AAA1	AAAS	AACS	AADAC	AADACL4	AADAT	AAK1	AANAT	AARS	AARS2	AARSD1	AASDHPPT	AASS	AATF	AATK	ABAT	ABCA1	ABCA10	ABCA17P	ABCA2	ABCA3	ABCA4	ABCA5	ABCA7	ABCB1	ABCB10	ABCB11	ABCB4	ABCB5	ABCB6	ABCB9	ABCC1	ABCC10
CTCF_CB_prom	MARCH5	MARCH9	AAAS	AANAT	AARS2	ABCA17P	ABCA2	ABCA3	ABCB10	ABCC11	ABCC5	ABCD4	ABHD14A	ABHD14B	ABLIM3	ABR	ABT1	ACAD11	ACAT1	ACBD4	ACCN2	ACCS	ACHE	ACOT1	ACOT13	ACPL2	ACSS2	ACTB	ACTL6A	ACTR1A	ACVR1C	ACY1	ADAM12	ADAM15	ADAMTS16	ADAMTS17	ADAMTS7	ADAMTSL2	ADAMTSL5	ADCK5	ADCY4	ADNP	ADPRHL2	ADRA2B	ADRA2C	ADRBK1	ADRM1	ADSL	ADSSL1
CTCF_CB_enhancer	MARCH1	MARCH5	MARCH8	MARCH9	MARCH10	1MARCH1	SEPT5	SEPT6	SEPT7	SEPT9	SEPT10	SEPT15	A2BP1	A2LD1	A2ML1	AAA1	AACS	AADAC	AADACL4	AADAT	AAK1	AANAT	AARS2	AARSD1	AASDHPPT	AATF	AATK	ABAT	ABCA1	ABCA10	ABCA17P	ABCA4	ABCB1	ABCB11	ABCB4	ABCB5	ABCB9	ABCC1	ABCC11	ABCC12	ABCC13	ABCC2	ABCC4	ABCC5	ABCC6	ABCD3	ABCD4	ABCG1	ABCG4
CTCF_CB_all	MARCH1	MARCH4	MARCH5	MARCH8	MARCH9	MARCH10	1MARCH1	SEPT4	SEPT5	SEPT6	SEPT7	SEPT9	SEPT10	SEPT15	A2BP1	A2LD1	A2ML1	AAA1	AAAS	AACS	AADAC	AADACL4	AADAT	AAK1	AANAT	AARS	AARS2	AARSD1	AASDHPPT	AASS	AATF	AATK	ABAT	ABCA1	ABCA10	ABCA17P	ABCA2	ABCA3	ABCA4	ABCA7	ABCB1	ABCB10	ABCB11	ABCB4	ABCB5	ABCB9	ABCC1	ABCC11	ABCC12
CTCF_ly1_prom	MARCH2	MARCH3	MARCH5	MARCH7	MARCH8	MARCH9	SEPT2	SEPT4	SEPT6	SEPT7	SEPT9	A2ML1	AAA1	AAAS	AANAT	AARS2	AARSD1	AASDHPPT	AATF	ABCA1	ABCA17P	ABCA2	ABCA3	ABCB10	ABCB5	ABCB8	ABCC1	ABCC11	ABCC4	ABCC5	ABCD1	ABCD2	ABCD4	ABHD13	ABHD14A	ABHD14B	ABHD15	ABHD3	ABHD4	ABHD5	ABHD6	ABI1	ABLIM3	ABR	ABT1	ACAD10	ACAD11	ACADVL	ACAP3
CTCF_ly1_enhancer	MARCH1	MARCH3	MARCH5	MARCH6	MARCH7	MARCH8	MARCH9	MARCH10	1MARCH1	SEPT4	SEPT5	SEPT6	SEPT7	SEPT8	SEPT9	SEPT10	1SEPT1	SEPT15	DEC1	A1CF	A2BP1	A2LD1	A2ML1	AAA1	AACS	AACSL	AADAC	AADACL4	AADAT	AAGAB	AAK1	AANAT	AARS2	AARSD1	AASDHPPT	AATF	AATK	ABAT	ABCA1	ABCA10	ABCA12	ABCA13	ABCA17P	ABCA2	ABCA3	ABCA4	ABCA5	ABCA8	ABCA9
CTCF_ly1_all	MARCH1	MARCH2	MARCH3	MARCH4	MARCH5	MARCH6	MARCH7	MARCH8	MARCH9	MARCH10	1MARCH1	SEPT2	SEPT4	SEPT5	SEPT6	SEPT7	SEPT8	SEPT9	SEPT10	1SEPT1	SEPT15	DEC1	A1CF	A2BP1	A2LD1	A2ML1	A4GALT	AAA1	AAAS	AACS	AACSL	AADAC	AADACL4	AADAT	AAGAB	AAK1	AANAT	AARS	AARS2	AARSD1	AASDHPPT	AASS	AATF	AATK	ABAT	ABCA1	ABCA10	ABCA12	ABCA13
P300_ly1_prom	SEPT6	AAGAB	ABHD13	ABLIM1	ACBD6	ACP2	ACP6	ACTB	ACTG1	ACTR3C	ACY3	ADAT2	ADIPOR2	ADORA2A	ADPGK	ADPRHL2	ADSL	AFF1	AFF3	AGPAT6	AK3	AKIRIN1	AKT1S1	AKT2	ALDH4A1	ALDOA	ALG3	AMPD2	ANAPC13	ANGEL1	ANKMY2	ANKRD10	ANKRD12	ANKRD13A	ANKRD17	ANKRD50	AP1S3	AP3S2	AP4M1	AP4S1	APBB1IP	APITD1	APTX	AQR	ARAF	ARHGAP4	ARHGAP5	ARHGEF1	ARHGEF7
P300_ly1_enhancer	SEPT9	A4GALT	AACS	ABCC1	ABCG1	ABHD12B	ABLIM1	ABLIM2	ABP1	ABR	ACOX3	ACOXL	ACSF3	ACTR3C	ACY3	ADAM19	ADAM29	ADAMTSL4	ADARB1	ADARB2	ADC	ADCY7	ADORA2A	ADPRHL1	ADRBK1	AEBP1	AFF1	AGPAT2	AGPAT6	AHDC1	AHI1	AHRR	AIM2	AKAP13	AKAP2	AKAP4	AKNA	AKT2	ALDH3B2	ALDH5A1	ALG3	AMN	AMPD2	ANAPC13	ANK3	ANKRD10	ANKRD11	ANKRD16	ANKRD17
P300_ly1_all	MARCH1	MARCH3	MARCH6	MARCH7	MARCH8	MARCH10	SEPT1	SEPT2	SEPT6	SEPT7	SEPT9	SEPT15	DEC1	A2BP1	A2M	A4GALT	AAA1	AACS	AAK1	AATF	ABAT	ABCA1	ABCA10	ABCA4	ABCA5	ABCA6	ABCA7	ABCA8	ABCA9	ABCB1	ABCB11	ABCB4	ABCB7	ABCC1	ABCC11	ABCC13	ABCC4	ABCC8	ABCD1	ABCD2	ABCD4	ABCE1	ABCG1	ABHD11	ABHD12	ABHD12B	ABHD15	ABHD2	ABHD8
ARID1A_mut_up_141_Ash_FL	ACP1	ACP5	ANXA6	AP2B1	APH1A	APOBEC3F	ARHGAP9	ARL4C	BCAP29	BRE	C2orf12	C2orf28	C3orf28	C8orf59	C9orf46	CASP1	CASP4	CD1D	CD24	CD247	CD47	CD84	CHST11	CLIC1	CLN5	COX11	COX7A2L	CXCR7	CYB5A	DNAJC15	DNPEP	DOCK7	DTX3L	EEF1B2	EHD1	EIF2S3	EIF4E2	FAM108A1	FAM108B1	FAM117A	FAM128A	FXYD5	FYN	GGCX	GLTSCR2	GNG11	GPN1	GRK5	hCG_20857
ARID1A_mut_down_390_Ash_FL	AACS	ABI1	ADAM28	ADARB1	AGPAT6	AHR	AHSA2	AKAP2	ALCAM	ALDH2	ANAPC4	ANK1	ANKRD13A	AP1G1	ARHGAP24	ARHGEF12	ARID5B	ARL2BP	ARL6IP6	ARPC5L	ASB13	ASH1L	ATF4	ATF5	ATF7IP	ATP8A1	AUH	B4GALT5	BCL6	BCL7A	BICD1	BMP2K	C10orf18	C12orf51	C14orf101	C14orf106	C14orf139	C17orf56	C17orf91	C18orf8	C1orf104	C1orf63	C1orf71	C1orf79	C1orf96	C8orf70	CARS	CBWD1	CBX3
CREBBP_mut_up_334_Ash_FL	MARCH1	AASDH	ACBD3	ACVR1	AFF3	AKAP11	AKAP13	ALKBH5	ANKMY2	APPL1	ARF6	ARL17	ASXL2	ATF1	ATF7IP	ATL3	ATRX	B4GALT1	BACH2	BBX	BCLAF1	BRWD1	BRWD3	C10orf118	C16orf52	C1orf108	C22orf32	C4orf30	C5orf21	C5orf41	C6orf166	C6orf199	C6orf35	C6orf72	C7orf10	CALCOCO2	CAMK2D	CAT	CCBL2	CCDC50	CCNI	CD24	CD69	CDC27	CDC40	CDKN1B	CHPT1	CHST11	CHURC1
CREBBP_mut_down_278_Ash_FL	ABCF1	ACTL6A	ADARB1	ADCK2	ADSL	ADSS	ALDH2	APEX1	ARHGEF2	ASNS	ATP1A1	ATP1B3	ATP5J2	ATPIF1	BASP1	BATF	BCAS4	BCL2	BOLA2	BPNT1	BTN2A2	C11orf24	C11orf75	C17orf89	C18orf55	C1orf142	C1orf19	C1orf31	C1orf41	C3orf1	C6orf125	C6orf129	C6orf153	C7orf47	C8orf38	C8orf40	CASC5	CD58	CD74	CD99	CDC16	CENPK	CENPN	CEP170	CHMP2A	CIRH1A	CLECL1	CLIC4	CLINT1
EP300_mut_up_104_Ash_FL	ADNP	AMZ2	ATF7IP	ATP2B1	ATRX	BANK1	BCL10	BRWD3	C5orf5	C6orf35	C7orf44	CDC2L6	CHCHD7	CHD9	CLK4	DAPP1	DAZAP2	DDHD1	DIP2B	DOPEY1	DUSP1	DYRK2	EBAG9	EPC1	ESCO1	FBXO30	FGFR1OP2	FRYL	FTH1	IKZF1	IQGAP1	JMJD1C	KATNA1	KIAA0232	KIAA1033	KLHL2	KRR1	MALAT1	MAP3K7	MAP3K7IP2	MBNL1	MED23	MEF2C	MORF4L2	MTF1	MTMR9	NBN	OSBPL11	OSBPL8
EP300_mut_down_271_Ash_FL	ABCA5	ADCK2	ADSL	AICDA	AK2	ALDOA	ALKBH7	APEX1	ARF5	ARMCX5	ARPC5	ASMTL	ATP5G1	ATP5G3	ATP5I	ATP5J2	ATP5O	AUTS2	BAG1	BCL6	BLMH	BTF3	BZW2	C11orf10	C11orf24	C11orf75	C1orf31	C1orf51	C20orf52	C21orf33	C3orf1	C4orf14	C5orf13	C6orf153	C6orf99	C7orf47	C7orf55	CAMLG	CAPNS1	CARHSP1	CCDC90A	CCNA2	CCT3	CCT8	CD247	CDC25B	CENPK	CEP55	CHCHD2
EZH2_mut_up_124_Ash_FL	ABCF1	ACO2	ADAM28	ARHGAP24	ARHGEF7	ASAH1	ASB2	ATP6V0A2	ATXN7	B4GALT5	BMP2K	BOLA2	BPNT1	BRD4	BRWD2	C17orf89	CBL	CCDC6	CCDC88B	CD22	CLPTM1L	CPSF1	CTBP1	CTNNBL1	CUGBP2	DDEF1	DENND3	DIAPH1	DKFZp547E087	EHD4	ELF4	FAM107B	FLJ21438	FNBP1	FOXK1	GATAD2A	GIT2	HCLS1	HLADQA1	HMGCR	IL12RB1	ILDR1	INPP5F	IQGAP1	ITPKB	KCNMB3	KIAA0746	KIAA1430	KIF3B
EZH2_mut_down_347_Ash_FL	MARCH3	AACS	AASDHPPT	ABI2	ACP1	ACP6	ACTR2	ACVR1	ADI1	AKT3	ALS2CR13	ANKMY2	ANP32A	APIP	ARFGAP3	ARHGAP15	ARHGEF6	ARL3	ARL5A	ASNSD1	BACH2	BCR	BLVRA	BMP7	BMPR1A	BMPR2	BRP44	C1GALT1C1	C2orf25	C4orf14	C4orf32	C5orf13	C5orf21	C5orf26	C6orf35	C6orf99	C7orf10	C9orf21	C9orf95	CAB39L	CABC1	CAMK2D	CAMLG	CCBL2	CCDC117	CCDC50	CD24	CD37	CD79B
KMT2D_mut_up_20_Ash_FL	CLEC2D	COQ5	GDI2	HARS	HSPA9	IDH3B	LETMD1	MLL2	MRPL10	MRPL43	PDPR	POLR2J2	PRRC1	RPUSD4	UQCRC2	WDR41	ZDHHC4
KMT2D_mut_down_41_Ash_FL	BBX	C9orf5	CAMK2D	CDC42EP3	CHD4	DDX6	DHX36	DHX9	FAM49A	FAM53B	JMJD1C	KIAA1333	KRR1	LOC100132235	MALAT1	MSL2L1	NBN	OSBPL11	OSBPL8	PAPD5	PPP1R12A	PRKCZ	PTPRA	RILPL2	RSRC1	SFRS2IP	STRBP	SYNCRIP	TOX4	TSPYL1	WSB2	YY1	ZFP91	ZFR	ZNF268	ZNF638
KMT2C_mut_up_144_Ash_FL	MARCH1	SEPT6	ACSL3	ADRBK2	AMIGO2	AMMECR1L	APOBEC3C	APOBEC3F	ARHGAP25	ASAH1	ASXL2	ATP11C	ATRX	BMI1	C1orf103	C22orf30	C6orf130	CEPT1	CLASP1	CNDP2	CNPY3	CREB1	CRKL	CTSS	CYBB	DAXX	DCP2	DDX6	DNPEP	ENPP4	FAM108A1	FLJ20309	FLJ27365	FOXN2	GALNT3	GLS	HLAA	HLADPA1	HLADQA1	HLAE	HLAJ	HMGN4	HNRNPH2	HNRPDL	HRB	IDS	IL7	ING1	INPP5D
KMT2C_mut_down_214_Ash_FL	ACAT1	ACSS1	ACYP2	ADK	AIG1	AMD1	AMZ2	ANKH	ARID1B	ASL	ATF4	ATP6V0B	AUH	BAX	BBS1	BCKDHB	BRP44L	BUB3	BXDC1	C11orf73	C12orf49	C14orf106	C15orf29	C17orf45	C17orf48	C6orf173	C6orf70	C6orf99	C9orf85	CASP1	CCDC126	CCDC64	CCL17	CCNB1	CCNB1IP1	CCNB2	CCNC	CCNE2	CD164	CD19	CD59	CD81	CDC2	CDC25B	CDCA2	CDR2	CEP152	CGGBP1	CIRBP
CREBBP.mouse.ChIPseq.LOSS.25.prom	SUGP2	OLFR433	DLG1	CNOT1	MLL3	AGPAT6	BCL2	FCRL5	HSF1	DEPDC1A	POP4	SUMF1	ARAF	LYST	TAP1	KDM2A	DONSON	PWP1	RALY	SNAI3	PUS1	CNKSR3	ZFP189	GM12942	FAM82A2	GALNT6	TMEM66	HSPA2	EARS2	ZFYVE21	PARD6B	ZFP787	BBS12	PACSIN2	PGM2	PER2	PPP4R1	4933417D19RIK	FAM86	PRICKLE3	MOB3C	AACS	UBR3	PTBP2	TRP53INP2	CDK4	SCAMP3	PIP4K2B	SLC25A42
CREBBP.mouse.ChIPseq.LOSS.25.enhancer	SUGP2	GM10416	E2F3	CNOT1	AW554918	AGPAT6	BCL2	ACSS2	HSF1	TRAPPC9	SLC1A2	SUMF1	ITGAL	TAP1	KDM2A	DENND1B	DONSON	PWP1	SLC25A28	RALY	PUS1	DLG1	GM12942	GALNT6	KLRAQ1	ZFP787	DCUN1D1	PACSIN2	HERC3	PGGT1B	SCAF8	RAPGEF5	SNAP23	PER2	PPP4R1	4933417D19RIK	SIPA1L1	AACS	UBR3	MAN2A1	PTBP2	ITGB3	MREG	KSR1	PIP4K2B	FOXP4	TLR13	RASL11A	WDR44
Promoter_loss.ATAC.reads_CREBBP.KD	C15orf62	CHRNE	CIITA	FAM129C	LINC01225	LINC01342	LOC100129046	LOC400958	MAP1LC3B2	MRPL38	MS4A1	RGS1	TRAF3IP3	ZNF101
Intron_loss.ATAC.reads_CREBBP.KD	ACOXL	ACSF3	ADAM23	ADAM29	ADAMTS6	ADORA1	AFF2	ALPK1	ANKRD55	ANOS1	AP1B1	APCDD1	AQP3	ARHGAP24	ARHGEF25	ARHGEF3-AS1	ATP2A3	ATP5L	AZIN2	BAG3	BCL2	BCRP3	BFSP2	BICD2	BLNK	BRINP3	C5orf56	C7orf60	C7orf72	CABLES1	CALN1	CARD11	CASC15	CBR4	CCDC148-AS1	CCDC6	CCDC69	CCDC9	CCM2	CD38	CD81	CDC25B	CDH1	CDK6	CHCHD3	CHRNB2	CHST13	CHST15	CLPTM1L
Distal_loss.ATAC.reads_CREBBP.KD	A4GALT	AATK	ACAA2	ACSF3	ACTR3BP2	ACTR3BP5	ACVR1	ACVR2A	ADAM6	ADAR	ADARB2-AS1	ADGRG1	ADGRL3	AFF2	AGPAT2	AGPAT4-IT1	AIRN	AKAP12	AKAP2	AKIRIN2	ALG10	ALG6	ALPP	AMBP	ANAPC1	ANAPC1P1	ANKRD26P1	ANKRD30BL	ANKRD46	ANO3	ANXA4	AP1G1	AQP9	ARHGEF18	ARHGEF3-AS1	ARID1B	ARRDC2	ARRDC3-AS1	ARTN	ATG101	ATP1A1	ATP8B1	BAK1	BCL2L14	BDH1	BDKRB1	BDKRB2	BEGAIN	BMS1P20
Enhancer_loss.ATAC.reads_CREBBP.KD	ACOXL	ACSF3	ADAM23	ADAM29	ADAMTS6	ADORA1	AFF2	ALPK1	ANKRD55	ANOS1	AP1B1	APCDD1	AQP3	ARHGAP24	ARHGEF25	ARHGEF3-AS1	ATP2A3	ATP5L	AZIN2	BAG3	BCL2	BCRP3	BFSP2	BICD2	BLNK	BRINP3	C5orf56	C7orf60	C7orf72	CABLES1	CALN1	CARD11	CASC15	CBR4	CCDC148-AS1	CCDC6	CCDC69	CCDC9	CCM2	CD38	CD81	CDC25B	CDH1	CDK6	CHCHD3	CHRNB2	CHST13	CHST15	CLPTM1L
Promoter_gain.ATAC.reads_CREBBP.KD	ABCC4	ADO	AGA	ALCAM	ATP10D	ATP5C1	BCRP2	C4orf27	C9orf91	CBLB	CBWD2	CCDC14	CECR5-AS1	CFAP97	CLDND1	CLK1	CRB1	DDX58	DDX60L	DHRS12	ELL2	EOGT	ETAA1	FAM200B	FCHSD1	FNIP2	GCA	GGH	GYPC	HSD17B4	IFT74	LRRC16B	LRRCC1	MOB1B	MRPL19	MRPS9	NFKBIE	NSUN2	OCIAD2	PLSCR1	POM121	PROS1	RANBP2	RNASEL	RPS23	SEC61G	SLITRK6	SPIDR	SSRP1
Intron_gain.ATAC.reads_CREBBP.KD	ABAT	ABLIM3	ADGRB3	AGA	AKAP6	ARHGAP21	ARHGEF9	ASB2	ATP10D	ATP2B3	ATXN1	BCAT1	BCHE	BFAR	BORCS5	C1orf21	C4orf33	CCDC91	CCR2	CDK13	COL15A1	COLEC12	DGKI	DMTN	DNAH7	DTNA	DUSP19	ERP44	FAM212B-AS1	FGF7	FRMD3	GBE1	GLI2	GOLIM4	GRID2	GSTO1	GTDC1	IL6R	ITGA2	KCNB2	KHDRBS2	KIAA0825	KLHL29	LAMC2	LINC00348	LPIN1	LRP1B	LURAP1L	LYPLAL1-AS1
Distal_gain.ATAC.reads_CREBBP.KD	ABI3BP	ADGRL3	AKR1C2	ALLC	AMER3	ANP32C	AQP7P1	ARHGAP5-AS1	ARID5A	BATF3	BCHE	BLVRA	C1GALT1	C3orf58	C5orf30	C6orf118	C8orf37-AS1	CARHSP1	CBLB	CCDC24	CD109	CDH6	CENPC	CHL1	CNTNAP2	COL11A1	COL8A1	CPEB2-AS1	CSNK1A1P1	CTLA4	CWC15	DACH1	DCAF4L2	DCC	DLGAP1-AS1	DMD	DNAJC12	DUSP19	DUSP5	EFNA5	EMX2OS	ERGIC2	ETV1	FABP2	FAM101A	FAM188A	FAM46A	FAM71C	FAM83D
Enhancer_gain.ATAC.reads_CREBBP.KD	ABAT	ABLIM3	ADGRB3	AGA	AKAP6	ARHGAP21	ARHGEF9	ASB2	ATP10D	ATP2B3	ATXN1	BCAT1	BCHE	BFAR	BORCS5	C1orf21	C4orf33	CCDC91	CCR2	CDK13	COL15A1	COLEC12	DGKI	DMTN	DNAH7	DTNA	DUSP19	ERP44	FAM212B-AS1	FGF7	FRMD3	GBE1	GLI2	GOLIM4	GRID2	GSTO1	GTDC1	IL6R	ITGA2	KCNB2	KHDRBS2	KIAA0825	KLHL29	LAMC2	LINC00348	LPIN1	LRP1B	LURAP1L	LYPLAL1-AS1
mouse.shCrebbp.r2.up_p.500	SNORD35B	MIR466D	EAF2	E130307A14RIK	TRIM17	4930455C13RIK	MIR3470A	FAM162A	FCHO2	SBSN	CCDC101	OBSCN	BICD1	MRPL14	CREB3L4	FKBP1B	4930455C13RIK	LRRC42	DYNLT1F	GM19897	MACROD1	4933439C10RIK	4930404I05RIK	2210404O09RIK	2310022A10RIK	FAM160B2	RP1L1	WRB	ZC4H2	MIR3471-1	FAM219A	MIR5626	HIST2H2AA2	KLHL35	GM4984	PPA2	4930500J02RIK	PLLP	UBA6	ANKRD46	SLC39A3	DTX3L	TFDP2	HYPK	MBNL3	NOA1	ALDH6A1	NME4	PRKCQ
mouse.shCrebbp.r2.down_p.500	NID2	ZFHX3	OARD1	CEP63	FTL1	ATP13A3	KANSL2	ETF1	INSIG1	EGLN2	MIR3101	RAB4B	IVNS1ABP	INTS6	NFKBIL1	ASUN	THUMPD3	ETNK1	TTC17	SSB	MYO10	GALNT2	GM17066	RBM26	GM7102	TSC22D2	TEF	PHF5A	BAIAP3	ING1	BC024139	EPPK1	KANK2	RPS6KA2	SLC35E1	TMEM189	CALR	DAND5	RAD23A	MRFAP1	GRAP	KCNH6	PCF11	VMAC	PAIP2B	WDR95	MIR7036	SRRT	CCDC12
mouse_shCrebbp.r2.up_328	MRPL30	GM20257	B3GNT7	GIN1	CD247	LACTB2	GM5523	EYA1	MIR5103	SNORD89	ICA1L	PDE6D	TSEN15	RGL1	MGST3	PVRL4	SLAMF6	SMYD2	TATDN3	NENF	CD46	RAET1A	RAET1B	RAET1C	RAET1D	RAET1E	HDDC2	CDH23	GM5134	MIR6409	SLC19A1	BC1	APPL2	MIR8104	PPM1H	ARHGAP9	H60B	CEP57L1	2510003E04RIK	MMP11	MIR678	PRMT2	SLC39A3	ZFP938	1190007I07RIK	CRADD	MRPL42	SLC16A7	BLOC1S1
mouse_shCrebbp.r2.down_545	RRS1	IL1R2	USP37	TMEM198	PIGR	IL10	CACNA1S	2810025M15RIK	PTPN14	MREG	A530032D15RIK	C130026I21RIK	GPR55	ARMC9	MIR3535	NCL	SNORA75	9430060I03RIK	2900060B14RIK	IL10	IL10	ELK4	DNM3	XCL1	RGS4	FCGR2B	FCER1G	CR2	CITED2	4930455C13RIK	GP49A	LILRB4	MCM9	SOWAHC	ADAMTS14	PRF1	CCAR1	EGR2	RHOBTB1	DERL3	BC1	MATK	PHLDA1	GNS	STAT2	STX11	MARCKS	PRDM1	4632428N05RIK
mouse.shCrebbp.r2.0_p.1000_up	ACSS1	ADAM23	ADI1	MIR6937	ADIPOR1	ADRA1B	AI848285	AIG1	AIRN	AKAP1	AKAP11	AKR1A1	ALAS1	ALDH6A1	AMBRA1	AMH	AMIGO1	AMY1	ANKRD28	ANKRD46	AP2M1	APOF	APOL7E	ARHGAP31	ARHGAP35	ARHGEF11	ARL6	ASB6	ASIC4	ATP5O	ATP6V0B	ATRN	AW112010	AXIN1	B3GNT4	B3GNT7	BC002163	BC021614	BC1	BCKDHA	BCORL1	BFSP2	BICD1	BMP10	BMYC	BRD7	BTBD7	CAAP1	CACNA1D
mouse.shCrebbp.r2.0_p.1000_down	ABTB2	ACACB	ACTN1	ACTR8	SELK	AGPAT3	AGPAT5	AHCYL2	AIM1L	AKR1B3	ALDH3B1	AMD1	AMIGO3	GMPPB	APOLD1	ARFIP2	ART3	ASUN	ATF6	ATP13A3	B3GNT2	B9D2	BAG3	BAIAP2	BAIAP3	EPPK1	BCCIP	BCL10	BCL2L15	BHLHE40	BHLHE41	BID	C2	CALR	DAND5	RAD23A	CARD6	CASS4	CAT	CBX6	NPCD	NPTXR	CCDC117	CCDC12	CCDC85B	CCDC94	CCRL2	CCT7	CD72
c1.Crebbp.up_198	ABCC8	ACCS	ALKBH3	ANK1	ANKRD30BL	APOD	ARHGAP10	ARMCX2	ATF5	BAIAP2L1	BEX2	BEX4	BMP3	BMP7	BMP8A	BNIP3	BOLA1	C10ORF10	C19ORF18	C22ORF36	C6ORF99	C9ORF129	CBLN3	CBR1	CCDC22	CCDC85A	CCL17	CCL28	CEBPB	CEBPD	CES4A	CHST15	CLEC4G	CPNE2	CRMP1	CRYBA4	CSDA	CYB5A	CYTH3	DAB2IP	DHX32	DNER	DUSP8	ECHDC2	EID3	EMILIN2	EML6	ENPP3	EVC
c1.Crebbp.down_397	ABCA2	ABCB1	ABCG1	ABI3	ACP5	ACPP	ACY3	ADAM8	ADD3	AFF1	AHNAK	ALDH2	AMICA1	AMOT	ANGPTL6	ANXA4	APP	ARHGAP15	ARHGAP18	ARHGAP44	ARID3A	ARL4A	ARRDC4	ARSD	ATP2B4	ATXN1	BACE2	BAG3	BATF2	BCAR3	BCL9L	BFSP2	BHLHE40	BHLHE41	BIN2	BLVRB	BRI3BP	C10ORF128	C10ORF54	C11ORF85	C12ORF42	C1ORF115	C1ORF228	C1ORF38	C20ORF103	C21ORF7	C3ORF25	C4ORF7	C6ORF204
c1.Ep300.up_381	ABHD1	ACCS	ACP2	ACTG1	ADAL	AIG1	ALDH4A1	AMT	ANKH	ANKRD23	ANKRD6	AP1M1	AP4S1	APBB2	ARF5	ARL2BP	ARPC4	ARPC5	ARSA	ATF5	ATP6AP1L	ATP6V0B	ATPAF1	AXIN1	BACE1-AS	BAX	BBC3	BCAT2	BCL2L1	BCS1L	BMP8A	BOLA1	C10ORF57	C11ORF41	C11ORF49	C11ORF68	C11ORF84	C15ORF17	C15ORF37	C16ORF42	C16ORF91	C17ORF100	C17ORF108	C17ORF90	C17ORF99	C19ORF39	C19ORF52	C1ORF123	C1ORF216
c1.Ep300.down_692	ABI3	ABLIM1	ACBD7	ACSL4	ACY3	ADAM15	ADAM9	ADM	ADRA2B	AEBP1	AFF1	AHCTF1	AHNAK2	AK1	AMD1	AMN	ANKRD58	ANP32D	APOBEC3H	AQR	ARFIP1	ARG2	ARHGAP26	ARHGAP42	ARHGAP9	ARHGEF25	ARHGEF6	ARID3A	ARID4B	ARL15	ARL5B	ARRDC4	ASTL	ATAD2	ATAD3C	ATG4C	ATG9B	ATL1	ATL2	ATP1B1	ATP6V0A1	ATRX	AVPI1	AZIN1	BACE2	BACH1	BAG3	BAG4	BATF2
c2.Crebbp.down_295	HIST3H2BB	PREX1	PLAC8	SLAMF7	S100A4	LMO2	CCDC144C	KLF4	PLD4	GBP2	LY6E	JAM3	RNASE6	TNFRSF13B	LGMN	TLE1	TBC1D9	NT5E	IL13RA1	RIN3	GBP4	TNFSF9	LOC100505746	GDPD5	ACY3	LILRA4	LAIR1	ITM2C	ITGB7	GBP5	SKAP1	TNFRSF1B	SELL	SPG20	SH3RF1	LOXL2	KIAA0125	DHRS9	SSBP3	GBP1	GPR132	ITGB2	PTPRK	RNF130	HIST3H2A	MLF1	RAB31	LOC643733	MGC39372
c2.Crebbp.up_205	C9orf174	CELF3	ANKUB1	DNMT3L	PCDHB19P	GOLGA6L5	LOC646851	ADCY10	MMP21	SAA2	PTPRU	NHLH1	LRRN4CL	KISS1R	C14orf37	ISM2	C6orf165	UMODL1	RAB42	C3orf70	CITED1	TCP10L	CA3	TMEM95	IKZF4	EPHX3	TDRD6	SORBS1	FAM180B	NACAD	CNTD2	FUT5	PIPOX	KIAA1024	NLGN3	C10orf67	SEMA6A	CDKL4	LOC100134713	NPHP3	PCDHB14	ATG9B	PCDHB9	SHROOM1	CCNI2	LOC100616668	NEK11	C7orf53	MIR486
c2.Ep300.down_468	IGJ	VPS37B	KIAA0226L	SLAMF7	GPR132	LGMN	JAM3	LY6E	RARA	DUSP5	FAM169A	TUFT1	METRNL	PLAC8	KLF4	SPG20	PNP	NT5E	PTPN1	LRRC33	MGC39372	MIR650	PTPRK	RRP12	CNN3	RNASE6	APP	SH2B3	HOMER2	PDCD4	RELB	MLF1	TMEM71	SERPINB8	NRARP	PLEKHA1	SPRY1	ABCB1	EMP1	TPST1	SIK2	C12orf75	LAIR1	PWWP2B	KIAA0125	BEND4	IL13RA1	C8orf83	ITM2C
c2.Ep300.up_32	ZNF497	CARD9	KCNRG	LOC442421	SFN	UPB1	SCG5	KIRREL2	C11orf35	LOC100132724	PFN4	ZNF197	MIR141	MIR659	MIR103A1	LOC100306951	MIR590	BICD1	TIGD1	MIR3679	MIR3175	MIR4639	MIR2355	GPR55	C5orf39	SNORA69	DPRXP4	PCDHGA6	PCDHGB2	PCDHGB3	PCDHGB1	RASL11A
c1.Crebbp.down_500	C10orf128	TNFRSF13B	CLNK	PTGDS	PARP15	CLEC17A	EGR3	FAM167A	KLRF1	RNASE6	CD68	LOC283070	RAB31	SPATC1	KIAA1274	CAMK1D	CD4	FAR2	TMEM71	LYZ	MIR3153	MIR4645	C7orf50	ABI3	HSPA7	CYSLTR1	PTPN22	TEX9	HOXB4	CD72	LOC100130301	MIR568	FCER1G	C1orf38	GNGT2	HOXB3	SYNGR3	DNAJB4	PTGS1	PACSIN1	OBFC2A	DSE	HCST	PRICKLE1	SESTD1	RUNX2	PLCH2	SNORD116-21	HHAT
c1.Crebbp.up_500	CELF5	CAPN8	UCP1	LCT	ADCY1	EFCAB1	GPR150	OR2D2	WNT7B	LOC100379224	OSCAR	SCUBE3	PRDM12	LGALS8-AS1	CELF4	SNCAIP	ATAT1	STK19	GNAS-AS1	RRH	KLHL10	COMMD1	BRP44L	C22orf24	RPUSD2	HAUS3	LOC113230	CRELD2	UQCRFS1	TEKT2	TMLHE	ZNF814	CNKSR1	ORAI3	ANKRD20A4	DOM3Z	VTN	C5orf55	HDAC6	FAM76A	C2orf28	FBXL22	COX4NB	ATP6V0B	PPP4R1	PNMA5	TRIM45	SLC25A14	TRIM3
c2.Crebbp.down_500	HIST3H2BB	PREX1	PLAC8	SLAMF7	S100A4	LMO2	CCDC144C	KLF4	PLD4	GBP2	LY6E	JAM3	RNASE6	TNFRSF13B	LGMN	TLE1	TBC1D9	NT5E	IL13RA1	RIN3	GBP4	TNFSF9	LOC100505746	GDPD5	ACY3	LILRA4	LAIR1	ITM2C	ITGB7	GBP5	SKAP1	TNFRSF1B	SELL	SPG20	SH3RF1	LOXL2	KIAA0125	DHRS9	SSBP3	GBP1	GPR132	ITGB2	PTPRK	RNF130	HIST3H2A	MLF1	RAB31	LOC643733	MGC39372
c2.Crebbp.up_500	C9orf174	CELF3	ANKUB1	DNMT3L	PCDHB19P	GOLGA6L5	LOC646851	ADCY10	MMP21	SAA2	PTPRU	NHLH1	LRRN4CL	KISS1R	C14orf37	ISM2	C6orf165	UMODL1	RAB42	C3orf70	CITED1	TCP10L	CA3	TMEM95	IKZF4	EPHX3	TDRD6	SORBS1	FAM180B	NACAD	CNTD2	FUT5	PIPOX	KIAA1024	NLGN3	C10orf67	SEMA6A	CDKL4	LOC100134713	NPHP3	PCDHB14	ATG9B	PCDHB9	SHROOM1	CCNI2	LOC100616668	NEK11	C7orf53	MIR486
c3.Crebbp.down_500	TNFRSF13B	BATF	S100A8	CLEC17A	SLAMF7	MIR155HG	IRF4	ZBTB32	S100A9	EBI3	DUSP15	CCL22	ARID3A	CXCL13	BCL2A1	RAB29	HCK	CCR7	LOC101927931	S100A4	VAMP5	TRPM4	PLAC8	FAIM3	NRROS	CRB3	TOX2	MNDA	CYB5R2	ADAP1	LINC00152	BATF3	CD44	SLCO4A1	FCRL5	FAM46C	NFKBID	HIST3H2A	DUSP5	MIR4435-1HG	RNASE6	CAMK1D	GBP1	CPVL	CFLAR	PIM2	LINC00944	LOC283070	C1orf186
c3.Crebbp.up_500	WDR87	SMCR5	TAS2R13	EHMT2	PCDHGA8	SMAD5-AS1	PTGER4P2-CDK2AP2P2	TDRD6	ENO4	PCDHGC5	PCDHGC4	PCDHGA9	PCDHGA3	PCDHGA5	LOC101928075	CRYM-AS1	NBPF25P	CRB2	ZNF286B	LRRC37A3	PCDHGA4	KIAA1377	LOC100506083	EFCAB5	LY86-AS1	H1FX-AS1	LINC00638	PCDHGB6	PCDHGB1	FSBP	NCR3LG1	ZNF286A	LOC101927740	HERC2	PWAR5	KATNAL2	LOC100128164	PCDHGA6	LOC284632	LOC441204	FOXO3B	HERC2P9	PCDHGB3	TRO	SLC36A4	MIR600HG	LOC101927438	CCDC144B	C15orf62
MD901.loss.25.prom.g	MARCH3	MARCH5	SEPT1	SEPT7	SEPT9	SEP15	AAAS	AARS2	AARSD1	ABCA11P	ABCB9	ABCD1	ABCD3	ABCF3	ABHD10	ABHD11	ABHD14A	ABHD14B	ABL1	ACAA1	ACAA2	ACACA	ACAD9	ACADM	ACADSB	ACADVL	ACAP1	ACAT1	ACBD3	ACIN1	ACLY	ACO2	ACOT7	ACSF3	ACSL4	ACTB	ACTL6A	ACTN3	ACTR6	ACVR1B	ACY1	ACY3	ADA	ADAM15	ADAM22	ADAM29	ADAT3	ADCK1	ADCK5
MD901.loss.25.enhancer.g	MARCH1	MARCH5	SEPT6	SEPT7	SEPT9	AACS	AARS2	ABCA11P	ABCC1	ABCC6	ABCC8	ABCD1	ABCG1	ABCG2	ABHD10	ABHD11	ABHD12B	ABHD14B	ABHD15	ABLIM2	ABR	ACAA1	ACAA2	ACACB	ACAD9	ACADVL	ACAP1	ACAT1	ACBD3	ACIN1	ACLY	ACOXL	ACSBG2	ACSF2	ACSF3	ACTG1	ACTL6A	ACVR1	ACVR1B	ACY3	ADA	ADAM10	ADAM15	ADAM19	ADAM22	ADAM29	ADAM32	ADAMTS13	ADAMTS16
MD901.loss.5.prom.g	MARCH3	SEPT7	AARSD1	ABCD1	ABL1	ACADVL	ACLY	ACSF3	ACTL6A	ACTR6	ACY3	ADAM15	ADIPOR2	ADPRH	ADSS	AFMID	AFTPH	AHCYL1	AHSA2	AIM1	AKAP2	ALDOA	ALKBH4	ALMS1	ALOX5	AMZ2	ANAPC13	ANG	ANGEL2	ANKLE1	ANKMY1	ANKRD12	ANKRD27	ANKRD33B	ANKS3	ANP32B	ANP32E	ANXA5	AP4M1	APEH	APLF	APOLD1	APOO	ARAP2	ARF1	ARF6	ARGLU1	ARID1B	ARID3A
MD901.loss.5.enhancer.g	MARCH1	SEPT7	SEPT9	ABCC1	ABCG1	ABCG2	ABHD12B	ABLIM2	ABR	ACACB	ACAD9	ACADVL	ACBD3	ACLY	ACSBG2	ACSF2	ACSF3	ACTG1	ACTL6A	ACY3	ADAM15	ADAM19	ADAM29	ADAM32	ADAMTS16	ADAMTS18	ADAMTS7	ADAP1	ADARB1	ADARB2	ADIPOR2	ADPRHL1	ADSS	AFF1	AFF2	AFTPH	AGPAT2	AHCYL1	AIM1	AK1	AKAP12	AKAP9	AKIRIN2	ALDOA	ALOX5AP	ANGEL2	ANKLE1	ANKRD1	ANKRD11
MD901.shCREBBP.dn.p.500	SLCO2A1	GNAO1	RBBP4	STXBP5L	KCNA7	GPI	SMARCC1	GNL3L	ZNF346	ATP6V1G2	RAD51D	NOL6	AP5B1	HM13	CSNK1G2	CS	CENPT	AP1M1	KCTD12	POLH	UBR7	CCDC18	LRRC47	STUB1	HGS	GTF3C4	BCL2L12	LUC7L	GPR124	NACC1	FHOD1	FBXW9	ACTB	SMG5	SFMBT2	PDE12	ZNF282	SAMD7	BICD2	XPO5	STK40	SNRNP70	ZNF506	ZNF611	DVL1	TMEM184A	IRF4	RRP7B	JRK
MD901.shCREBBP.dn.p.1000	STK32A	PYGO1	GNAO1	GPR153	RBBP4	STK11IP	ADNP2	MGA	DYRK2	STXBP5L	UBAP2L	KCNA7	GPI	ACTN1	NUDT4	USP37	MAPRE1	SLC25A23	SMARCC1	LYN	ASB1	TCF20	RBM15B	ZNF444	CYB5R2	LSS	GNL3L	FASTK	HERPUD1	ZNF346	TENC1	PAWR	RBM10	ATP6V1G2	RAD51D	NDRG4	RPIA	NOL6	AP5B1	C2CD5	TAF1B	ZNF496	RAPGEF6	PKN1	HM13	CSNK1G2	CS	C19orf71	CENPT
CREBBP.LY7.enhancer	AUTS2	CUX1	SNX29	ST6GAL1	FOXP1	PLCG2	XKR6	DIP2C	LPP	GAB1	PALM2-AKAP2	CCDC88C	OSBPL10	ARID5B	RERE	TNFAIP8	BLK	ETV6	RAPGEF1	DTX1	ITPKB	MSI2	FAM167A	EBF1	TPD52	CADPS	ZCCHC7	KIAA1274	RABGAP1L	AKAP13	SPRED2	PPP2R5C	RFTN1	DLG2	RAD51L1	BCAS4	C8orf12	2016-09-09	PTPRJ	BCL2L1	HIVEP2	LARGE	DEPDC6	SMARCA4	SH3KBP1	RHBDD1	ADARB2	ARHGEF3	ABLIM1
CREBBP.LY7.promoter	PCBP1	BCL6	BRD2	RGS3	CBX3	LOC100129387	HEXIM1	DUSP22	POU2AF1	ENTPD4	MND1	NCRNA00167	RNASEH2B	HERPUD1	ARRDC3	BST2	CCNG2	BLK	RFX3	UCP2	CD37	PRDM10	TBL1XR1	GABPB1	MYBPC2	HIST1H2BK	C12orf57	TUBB	HNRNPA2B1	MDC1	SET	WIBG	SERINC4	TREML2	TMC6	PSMB3	FKBP14	FLJ10038	HIST2H2BE	IGLL5	BTG2	SYK	HMGB1	CXCR4	C13orf18	SORL1	STK17B	MDM4	SGMS1
[truncated: 5,000 more columns]
