# Supplementary material for: CREBBP Inactivation Promotes the Development of HDAC3-Dependent Lymphomas
Source: Oxford University Press journal article supplement (doi:10.1158/2159-8290.cd-16-0975), 2016-10-12
Supplement: 21598290cd160975-sup-171123_1_supp_3697435_qqtq3d.xlsx [file 21598290cd160975-sup-171123_1_supp_3697435_qqtq3d.xlsx]

## Sheet: Tab1
Tab 1: Enriched pathways in genes lost greater than 25% H3K27ac at either their promoters or enhancers in mouse vavP-Bcl2/CrebbpKD tumor cells compared to control cells.
Pathway Name	BH correted p value for loss.25.promoter.gene	BH correted p value for loss.25.enhancer.gene	Overlapping genes in loss.25.promoter.gene	Overlapping genes in loss.25.enhancer.gene
CTCF_CB_all	0.0341001	1.52419e-17	AACS AATF ABCC1 ABHD10 ABHD13 ABT1 ACIN1 ACSL4 ACTB ACTR2 ACTR6 ADNP ADRM1 AGPAT5 AGPAT6 AGTPBP1 AHCYL1 AHDC1 AIG1 ALG1 ALKBH3 AMPD2 ANXA5 AP1B1 AP2S1 APBA3 ARAF ARFGEF2 ARFIP1 ARL13B ARL15 ARL5A ARL8A ARL8B ARMC6 ARNTL ARSA ASB15 ATF2 ATP1B3 ATP6V1C1 ATP6V1H ATPAF2 ATR ATXN1L BAZ1B BCL2 BCL9 BEND3 BHLHE40 BICD2 BNIP1 BOP1 BPNT1 BTBD9 BUD31 CASP6 CCDC132 CCDC146 CCDC58 CCDC66 CCDC86 CCDC93 CCND2 …	AACS AAK1 ABCC1 ACIN1 ACSL4 ACSS2 ACTR2 ACTR6 ADNP ADRM1 ADSSL1 AGAP2 AGPAT6 AGPAT9 AGTPBP1 AHCYL1 AHCYL2 AHDC1 AKAP12 AKAP2 ALG1 AMPD2 ANK3 ANXA5 AP1B1 AP1S3 AP2S1 APBA3 APP ARFGEF2 ARFIP1 ARHGAP17 ARHGAP21 ARHGAP26 ARID1B ARID4B ARID5B ARL13B ARL15 ARL8A ASS1 ASXL2 ATF2 ATF6 ATG16L2 ATP1B3 ATP6V1C1 ATP6V1H ATPAF2 ATR ATXN1L ATXN7L1 BAZ1B BCAR3 BCL2 BCL9 BCL9L BHLHE40 BMP2K BNIP1 BOP1 BPNT1 BRD4…
CTCF_CB_enhancer		1.77491e-16	AACS AATF ABCC1 ABHD10 ABHD13 ABT1 ACIN1 ACSL4 ACTB ACTR2 ACTR6 ADNP AGPAT5 AGPAT6 AGTPBP1 AHDC1 AIG1 ALKBH3 AMPD2 ANXA5 AP1B1 AP2S1 ARAF ARFGEF2 ARFIP1 ARL13B ARL15 ARL5A ARL8A ARL8B ARMC6 ARNTL ARSA ATF2 ATP1B3 ATP6V1H ATPAF2 ATR ATXN1L BAZ1B BCL2 BCL9 BHLHE40 BICD2 BNIP1 BOP1 BPNT1 BTBD9 BUD31 CASP6 CCDC132 CCDC146 CCDC66 CCDC86 CCDC93 CCND2 CCND3 CCNH CCNI CDC42SE2 CDH23 CDK6 CDKN2AIP CENPP C…	AACS AAK1 ABCC1 ACIN1 ACSL4 ACTR2 ACTR6 ADNP AGPAT6 AGPAT9 AGTPBP1 AHCYL2 AHDC1 AKAP12 AKAP2 AMPD2 ANK3 ANXA5 AP1B1 AP1S3 AP2S1 APP ARFGEF2 ARFIP1 ARHGAP17 ARHGAP21 ARHGAP26 ARID1B ARID4B ARID5B ARL13B ARL15 ARL8A ASS1 ASXL2 ATF2 ATF6 ATP1B3 ATP6V1H ATPAF2 ATR ATXN1L ATXN7L1 BAZ1B BCAR3 BCL2 BCL9 BCL9L BHLHE40 BMP2K BNIP1 BOP1 BPNT1 BRD4 BTBD9 CABIN1 CAMK2D CAPZB CASC5 CASK CASP6 CCBP2 CCDC132 CC…
CTCF_ly1_all	2.66745e-06	1.51776e-20	AACS AATF ABCC1 ABHD10 ABHD13 ABHD6 ABT1 ACADVL ACIN1 ACSF2 ACSL4 ACTB ACTR2 ACTR6 ADAM10 ADAM9 ADAMTS13 ADNP ADPGK ADRM1 AGPAT5 AGPAT6 AGTPBP1 AHCYL1 AHDC1 AIG1 AKIRIN1 ALG1 ALKBH3 AMD1 AMPD2 ANKRD13A ANXA5 AP1B1 AP2S1 APBA3 APH1B APPL1 ARAF ARAP2 ARFGEF2 ARFIP1 ARFIP2 ARL13B ARL15 ARL5A ARL8A ARL8B ARMC6 ARNTL ARSA ASB15 ATF2 ATP1B3 ATP6V0B ATP6V1C1 ATP6V1H ATPAF2 ATR ATXN1L ATXN7L3 BAX BAZ1B B…	AACS AAK1 ABCC1 ABHD6 ACADVL ACIN1 ACOT11 ACSF2 ACSF3 ACSL4 ACSS2 ACTR2 ACTR6 ADAM10 ADAM17 ADAM9 ADAMTS13 ADNP ADPGK ADRM1 ADSSL1 AGAP2 AGPAT6 AGPAT9 AGTPBP1 AHCYL1 AHCYL2 AHDC1 AKAP12 AKAP2 AKIRIN1 ALG1 AMPD2 ANK3 ANKRD13A ANO6 ANXA5 AP1B1 AP1S3 AP2S1 APBA3 APP ARAP2 ARFGEF2 ARFIP1 ARFIP2 ARHGAP17 ARHGAP21 ARHGAP26 ARID1B ARID4B ARID5B ARL13B ARL15 ARL8A ARPC1B ASS1 ASXL2 ATF2 ATF6 ATG16L2 ATP1…
CTCF_ly1_enhancer	0.0030007	9.47899e-20	AACS AATF ABCC1 ABHD10 ABHD13 ABHD6 ABT1 ACADVL ACIN1 ACSF2 ACSL4 ACTB ACTR2 ACTR6 ADAM10 ADAM9 ADAMTS13 ADNP ADPGK AGPAT5 AGTPBP1 AHCYL1 AHDC1 AIG1 AKIRIN1 ALKBH3 AMD1 AMPD2 ANKRD13A ANXA5 AP1B1 AP2S1 APH1B APPL1 ARAF ARAP2 ARFGEF2 ARFIP1 ARL13B ARL15 ARL5A ARL8A ARL8B ARMC6 ARNTL ARSA ASB15 ATF2 ATP1B3 ATP6V0B ATP6V1C1 ATP6V1H ATPAF2 ATR ATXN1L BAX BAZ1B BBS12 BCL2 BCL9 BEND3 BHLHE40 BICD2 BNIP…	AACS AAK1 ABCC1 ABHD6 ACADVL ACIN1 ACOT11 ACSF2 ACSF3 ACSL4 ACTR2 ACTR6 ADAM10 ADAM17 ADAM9 ADAMTS13 ADNP ADPGK ADSSL1 AGPAT9 AGTPBP1 AHCYL1 AHCYL2 AHDC1 AKAP12 AKAP2 AKIRIN1 AMPD2 ANK3 ANKRD13A ANO6 ANXA5 AP1B1 AP1S3 AP2S1 APP ARAP2 ARFGEF2 ARFIP1 ARHGAP17 ARHGAP21 ARHGAP26 ARID1B ARID4B ARID5B ARL13B ARL15 ARL8A ARPC1B ASS1 ASXL2 ATF2 ATF6 ATG16L2 ATP1B3 ATP6V0B ATP6V1C1 ATP6V1G3 ATP6V1H ATPAF2…
CTCF_NB_all	0.000946341	1.89148e-21	AACS AATF ABCC1 ABHD10 ABHD13 ABHD6 ABT1 ACIN1 ACSL4 ACTB ACTR2 ADNP ADRM1 AGPAT5 AGPAT6 AGTPBP1 AHCYL1 AHDC1 AIG1 ALG1 ALKBH3 AMD1 AMPD2 ANXA5 AP1B1 AP2S1 APBA3 ARAF ARFGEF2 ARFIP1 ARL13B ARL15 ARL5A ARL8A ARL8B ARMC6 ARNTL ASB15 ATF2 ATP1B3 ATP6V1C1 ATP6V1H ATPAF2 ATR ATXN1L BAZ1B BBS12 BCL2 BCL9 BEND3 BHLHE40 BICD2 BNIP1 BTBD9 CASP6 CCDC132 CCDC146 CCDC58 CCDC66 CCDC86 CCDC93 CCND2 CCND3 CCNH …	AACS AAK1 ABCC1 ABHD6 ACIN1 ACSL4 ACTR2 ADNP ADRM1 ADSSL1 AGAP2 AGPAT6 AGPAT9 AGTPBP1 AHCYL1 AHCYL2 AHDC1 AKAP12 AKAP2 ALG1 AMPD2 ANK3 ANXA5 AP1B1 AP1S3 AP2S1 APBA3 APP ARFGEF2 ARFIP1 ARHGAP17 ARHGAP21 ARHGAP26 ARID1B ARID4B ARID5B ARL13B ARL15 ARL8A ASS1 ASXL2 ATF2 ATF6 ATG16L2 ATP1B3 ATP6V1C1 ATP6V1H ATPAF2 ATR ATXN1L ATXN7L1 BAZ1B BCAR3 BCL2 BCL9 BCL9L BHLHE40 BMP2K BNIP1 BRD4 BTBD9 CABIN1 CAM…
CTCF_NB_enhancer	0.017724	1.38013e-20	AACS AATF ABCC1 ABHD10 ABHD13 ABHD6 ABT1 ACIN1 ACSL4 ACTB ACTR2 ADNP AGPAT5 AGTPBP1 AHCYL1 AHDC1 AIG1 ALKBH3 AMD1 AMPD2 ANXA5 AP1B1 AP2S1 ARAF ARFGEF2 ARFIP1 ARL13B ARL15 ARL5A ARL8A ARL8B ARMC6 ARNTL ATF2 ATP1B3 ATP6V1H ATPAF2 ATR ATXN1L BAZ1B BBS12 BCL2 BCL9 BHLHE40 BICD2 BNIP1 BTBD9 CASP6 CCDC132 CCDC146 CCDC66 CCDC86 CCDC93 CCND2 CCND3 CCNH CCNI CDC42SE2 CDH23 CDK6 CDKN2AIP CEP68 CEP78 CHORDC…	AACS AAK1 ABCC1 ABHD6 ACIN1 ACSL4 ACTR2 ADNP AGPAT9 AGTPBP1 AHCYL1 AHCYL2 AHDC1 AKAP12 AKAP2 AMPD2 ANK3 ANXA5 AP1B1 AP1S3 AP2S1 APP ARFGEF2 ARFIP1 ARHGAP17 ARHGAP21 ARHGAP26 ARID1B ARID4B ARID5B ARL13B ARL15 ARL8A ASS1 ASXL2 ATF2 ATF6 ATG16L2 ATP1B3 ATP6V1H ATPAF2 ATR ATXN1L ATXN7L1 BAZ1B BCAR3 BCL2 BCL9 BCL9L BHLHE40 BMP2K BNIP1 BRD4 BTBD9 CABIN1 CAMK2D CAPZB CASC5 CASK CASP6 CCBP2 CCDC132 CCDC6…
denovobivGenes		0.00122319	ABHD10 ACADVL ADAM9 AHDC1 ANXA5 ARFIP1 CCDC66 CDK6 CHMP1B CRY2 DAZAP1 DCAF5 DGAT2 ERF ETV6 FAM26F GALNT10 GPHN ITPR1 KDM2A KLF9 LAMP1 LZTFL1 MCOLN1 MFSD1 MPP5 MYEOV2 NFATC2 NR1D2 PDCD4 PDXK PFKP PSMB2 PSMB6 RBBP7 RNF2 RPS12 RPS6KA3 SFXN1 SLC27A1 SI3 ST14 TGFB3 TM2D2 TMEM66 TNFRSF12A TRAF6 TXNRD1 UBL3 VAV2 ZADH2 ZFHX2 ZHX1	ACADVL ACSF3 ADAM9 AHDC1 ANXA5 APP ARFIP1 ARHGAP26 ARID1B CCDC66 CDK6 CHSY1 CMIP COQ2 CRTC3 CRY2 DAZAP1 DCAF5 DNMT3A DTX4 DUSP6 ERF ETV6 FAR1 FNDC3A FOXP4 GPHN IFT140 ITPR1 KDM2A LAMC1 LAMP1 LZTFL1 MCOLN1 MFSD1 MYEOV2 NCOA2 NFATC2 NRIP1 PDXK PFKFB3 PFKP PPAP2B PPP1R13B PREP PSMB6 PTPN1 RPS6KA3 RSU1 SFXN1 SLAIN1 SLC27A1 SLC2A1 SMAD3 SORBS1 ST14 TBC1D16 TNFRSF12A TRAF6 TSHZ1 TXNRD1 UBL3 VAV2 ZADH2 …
GC_termDiff_Genes		0.0267679	ADAM10 ARAP2 ATP6V0B BBS12 BCL2 BHLHE40 CALR CCND2 CENPB CNKSR3 DBP DCTN3 DJC3 DOCK10 DRAP1 ERF FAM110A FAM195B FAU GADD45G GALNT10 GALNT11 GNS KCNK5 LAMP1 MAF MRPL54 MYEOV2 MYO6 OAZ1 ORMDL3 OSTM1 PDCD4 PDXK PIM2 PRKACB PSMB9 RAB11B RAP1GDS1 REEP3 RPL13 RPL3 RPS16 RPS5 RRP7A SH2D2A SLC35D2 SPCS3 ST6GALC4 TAP1 TMBIM4 TMED2 TMEM50A TMEM66 TMEM9B TRAM1 TRPS1 TUSC3 UBL3 YIPF1 YIPF5 ZDHHC12 ZNHIT1	AAK1 ADAM10 ADSSL1 APP ARAP2 ATP6V0B BCL2 BCL9L BHLHE40 CALR CCND2 CD9 CREBL2 CRTC3 CYFIP1 DBP DCTN3 DJB5 DJC3 DNMT3A DOCK10 DRAP1 DUSP16 DUSP6 ERF FAM110A FAM195B FAU FNDC3A FYN GADD45G GNS GPR174 HIPK2 INPP4A ITPK1 KCNK5 KCTD21 LAMC1 LAMP1 LIMS1 MAP3K5 MBNL2 MYEOV2 NOD2 OAZ1 ORMDL3 OSBPL5 OSTM1 P2RX7 PDE4D PDXK PIM2 PLAU PTPN14 RAB11B RABAC1 RAP1GDS1 RASGRF2 RBX1 REEP3 RIN3 RPL13 RPL3 RPS16 RPS…
GCB.DLBCL_1085_intersectSignature_Huimin	2.53593e-07	6.09967e-11	ACAP2 ADAM9 AHDC1 AKIRIN1 ARL8A ARL8B ATF2 ATP1B3 ATP6V1C1 ATP6V1H ATXN1L ATXN7L3 BHLHE40 BUD31 CCDC132 CDKN2AIP CHKA CHORDC1 CNST CPEB4 CREBBP CSNK1D DCAF5 DCUN1D3 DDA1 DJC3 EIF5 GNS HECA HEXA HSPA1B HSPH1 INSIG1 KCTD5 KDM5C KDM6A LAMP1 LEMD3 LIN7C LMAN2L LONP1 MAFF MAPRE1 MBTD1 MICU1 MTMR3 NF1 NFKBIB NRBF2 OSTM1 OTUD5 PAFAH1B2 PAN3 PATL1 PIAS4 PPFIA1 REEP3 RRAGC SEC24B SLC1A5 SLC39A7 SI1 STAU1 …	ACAP2 ADAM17 ADAM9 AHDC1 AKIRIN1 ARID5B ARL8A ASXL2 ATF2 ATP1B3 ATP6V1C1 ATP6V1H ATXN1L ATXN7L3 BHLHE40 BRD4 CCDC132 CCNL1 CDKN2AIP CHKA CHORDC1 CHSY1 CNST CREBBP CSNK1D DCAF5 DCUN1D3 DDA1 DJC3 E2F3 EIF5 ERP44 FBXO33 FGFR1OP2 FXR1 FYN GNS GOLM1 GPR107 HECA HEXA JMJD1C KCMF1 KCTD5 KDM6A KP4 KTN1 LAMP1 LIN7C LMAN2L LMTK2 LONP1 MAFF MAPRE1 MBNL2 MBTD1 MICU1 MTMR3 MXD1 NCOA2 NIPA2 NRBF2 OSTM1 OTUD5 P…
GCB.promoter.BCL6.all.5541	1.70469e-43	6.60554e-46	ABCF2 ABHD10 ABHD13 ABT1 ACAP2 ACIN1 ACSL4 ACTB ACTR2 ADAM9 ADAMTS13 ADNP ADNP2 ADPGK AGPAT5 AKIRIN1 ALKBH3 AMD1 AMDHD2 ANKRD13A AP2S1 APBA3 APPL1 ARAP2 ARFGEF2 ARFIP1 ARL15 ARL5A ARL8B ATAD5 ATF2 ATP1B3 ATP6V0B ATP6V1C1 ATP6V1H ATR BAX BCL9 BEND3 BICD2 BNIP1 BPNT1 BRI3BP BTBD9 BZW1 CASP6 CASP8AP2 CCDC132 CCDC58 CCDC75 CCND2 CCND3 CCNH CCNI CCT8 CD164 CDC42SE2 CDK4 CDK6 CDKN2AIP CENPP CHCHD8 CHFR…	AAK1 ABCF2 ACAP2 ACIN1 ACSL4 ACTR2 ADAM17 ADAM9 ADAMTS13 ADNP ADNP2 ADPGK AHCYL2 AKIRIN1 ANKRD13A ANO6 AP1S3 AP2S1 APBA3 APP ARAP2 ARFGEF2 ARFIP1 ARHGAP17 ARID1B ARID4B ARID5B ARL15 ASXL2 ATF2 ATF6 ATG16L2 ATP1B3 ATP6V0B ATP6V1C1 ATP6V1H ATR B4GALT1 BAX BCAR3 BCL9 BMP2K BNIP1 BPNT1 BRI3BP BTBD19 BTBD9 BZW1 CABIN1 CAMK2D CAPRIN1 CAPZA1 CASC5 CASP6 CASP8AP2 CCDC132 CCDC9 CCND2 CCND3 CCNI CCNL1 CCT8…
GCB.promoter.BCL6.alone.106	0.0107816		ARFGEF2 BCL9 CASP8AP2 COX8A FAM118B LARP1 LONP1 PPP1R3F PRKACB RPUSD4 SLC27A1 TMEM146	ARFGEF2 BCL9 BTBD19 CASP8AP2 COX8A FAM118B LONP1 PTPRC SLC27A1
GCB.promoter.BCL6.SMRT.BCOR.1306	0.00193917	4.20257e-07	ABHD13 ACIN1 ADNP BEND3 BNIP1 BPNT1 BRI3BP CCNI CCT8 CD164 COMMD7 COPS7B COX4I1 CTNNBL1 DBP DDX10 DRAP1 DYNLL1 EIF5 EPN1 EPT1 FAM129C GLRX5 HBXIP HIF1A HNRNPD HSPD1 HSPE1 HSPH1 IPO4 KLHL14 KRR1 LAMP1 LARP4 LCP1 LIG4 LPCAT1 LYST MANBA MEPCE MPEG1 MRPL44 MYCBP2 MYST3 PAN3 PLSCR1 PRDM15 PTGES3 PUS1 RAD23B RAD9B RASGEF1B RMND1 RPL3 RPS12 RPS16 SCAR13 SDAD1 SLC1A5 SNHG10 SNORD43 SPNS1 SPRED2 STX8 TBCE…	ACIN1 ADNP AP1S3 ARHGAP17 ARID5B ATF6 BNIP1 BPNT1 BRI3BP CCNI CCNL1 CCT8 CD164 CD2AP COPB1 COPS7B CREBL2 CTNNBL1 DBP DOK3 DRAP1 DTX4 DYNLL1 E2F3 EIF5 ELMO1 GNB2 GSK3B HBXIP HIF1A HNRNPD HNRNPF HSPD1 HSPE1 JMJD1C KRR1 LAMC1 LAMP1 LANCL2 LARP4 LCP1 LPCAT1 LYST MANBA MAP4K1 MND1 MTMR14 MYCBP2 MYST3 NEDD9 NIPA2 NSMCE2 PAN3 PIK3CA PIKFYVE PION PLSCR1 POU2F1 PPFIBP2 PTGES3 PUS1 PVT1 RAD23B RASGEF1B REL…
GCB.promoter.BCL6-BCOR.all.5451	1.16351e-40	2.49811e-44	ABCF2 ABHD10 ABHD13 ABT1 ACAP2 ACIN1 ACSL4 ACTB ACTR2 ADAM9 ADAMTS13 ADNP ADNP2 ADPGK AGPAT5 AKIRIN1 ALKBH3 AMD1 AMDHD2 ANKRD13A AP2S1 APBA3 APPL1 ARAP2 ARFIP1 ARL15 ARL5A ARL8B ATAD5 ATF2 ATP1B3 ATP6V0B ATP6V1C1 ATP6V1H ATR BAX BEND3 BICD2 BNIP1 BPNT1 BRI3BP BTBD9 BZW1 CASP6 CCDC132 CCDC58 CCDC75 CCND2 CCND3 CCNH CCNI CCT8 CD164 CDC42SE2 CDK4 CDK6 CDKN2AIP CENPP CHCHD8 CHFR CHIC2 CHMP1B CHORDC1 …	AAK1 ABCF2 ACAP2 ACIN1 ACSL4 ACTR2 ADAM17 ADAM9 ADAMTS13 ADNP ADNP2 ADPGK AHCYL2 AKIRIN1 ANKRD13A ANO6 AP1S3 AP2S1 APBA3 APP ARAP2 ARFIP1 ARHGAP17 ARID1B ARID4B ARID5B ARL15 ASXL2 ATF2 ATF6 ATG16L2 ATP1B3 ATP6V0B ATP6V1C1 ATP6V1H ATR B4GALT1 BAX BCAR3 BMP2K BNIP1 BPNT1 BRI3BP BTBD9 BZW1 CABIN1 CAMK2D CAPRIN1 CAPZA1 CASC5 CASP6 CCDC132 CCDC9 CCND2 CCND3 CCNI CCNL1 CCT8 CD164 CD2AP CD2BP2 CD80 CDC4…
GCB.promoter.BCL6-SMRT.all.1306	0.00193917	4.20257e-07	ABHD13 ACIN1 ADNP BEND3 BNIP1 BPNT1 BRI3BP CCNI CCT8 CD164 COMMD7 COPS7B COX4I1 CTNNBL1 DBP DDX10 DRAP1 DYNLL1 EIF5 EPN1 EPT1 FAM129C GLRX5 HBXIP HIF1A HNRNPD HSPD1 HSPE1 HSPH1 IPO4 KLHL14 KRR1 LAMP1 LARP4 LCP1 LIG4 LPCAT1 LYST MANBA MEPCE MPEG1 MRPL44 MYCBP2 MYST3 PAN3 PLSCR1 PRDM15 PTGES3 PUS1 RAD23B RAD9B RASGEF1B RMND1 RPL3 RPS12 RPS16 SCAR13 SDAD1 SLC1A5 SNHG10 SNORD43 SPNS1 SPRED2 STX8 TBCE…	ACIN1 ADNP AP1S3 ARHGAP17 ARID5B ATF6 BNIP1 BPNT1 BRI3BP CCNI CCNL1 CCT8 CD164 CD2AP COPB1 COPS7B CREBL2 CTNNBL1 DBP DOK3 DRAP1 DTX4 DYNLL1 E2F3 EIF5 ELMO1 GNB2 GSK3B HBXIP HIF1A HNRNPD HNRNPF HSPD1 HSPE1 JMJD1C KRR1 LAMC1 LAMP1 LANCL2 LARP4 LCP1 LPCAT1 LYST MANBA MAP4K1 MND1 MTMR14 MYCBP2 MYST3 NEDD9 NIPA2 NSMCE2 PAN3 PIK3CA PIKFYVE PION PLSCR1 POU2F1 PPFIBP2 PTGES3 PUS1 PVT1 RAD23B RASGEF1B REL…
GCB_BCL6SMRT_Distal_Enhancer		0.000935118	ARFGEF2 ARL5A COX4I1 CPEB4 DUSP4 FAM73A FCRL5 FFAR2 GRHPR ID2 IRF8 KLHDC4 MCTP2 MGAT5 MPEG1 NCOR2 RASGEF1B RNGTT SPRED2 TBL1XR1 VPS8 WDR1 ZBTB49	ARFGEF2 ARID5B BCAR3 BMP2K CD2AP CHD2 CHD7 CMAH COQ2 CTCFL DENND5B DNMT3A FAM73A GALNT14 GFOD1 GRHPR IKZF1 IRF8 ITPR2 KLHDC4 LASS4 MCTP2 MGAT5 MREG NEDD9 NFAM1 PPAP2B RABAC1 RAP1B RASGEF1B RASL11A REL RNGTT RUNX3 SEMA4D SNX30 SNX5 SPRED2 STIM2 STK17B TLE3 TMEM123 TXN2 USP12 WDR1
Glucose_starve_down	0.0391792		ADNP ATP6V0B BCL2 E2F1 EHD1 ELL G3BP1 ID2 LPAR2 PDCD4 TIMM17A TMEM66 UBE2N USP33	ADNP ATP6V0B BCL2 CAPZA1 EHD1 ELL ELMO1 G3BP1 LPAR2 RAB2A TNNT1 UBE2N USP12 USP33
Glutamine_Glucose_starve_both_down	0.00246617	0.0449354	AATF ACADVL ACIN1 ADRM1 AMD1 ATP1B3 CDK4 DDX21 DRAP1 EIF4G1 EXOSC9 HSP90AA1 HSPA8 HSPE1 ID2 JAK1 LANCL1 LPCAT1 MAP4K2 NXF1 PA2G4 PGAM1 PTDSS1 RRP9 SLC1A5 SNRPC STAU1 SYNCRIP TAF10 TIMM17A TMED2 UBE2L3 UBXN1 WDR43	ACADVL ACIN1 ADRM1 ARID4B ASS1 ATP1B3 CDT1 DRAP1 EIF4G1 ETF1 EXTL3 HSPA8 HSPE1 JAK1 LPCAT1 MAP4K2 NXF1 PA2G4 PGAM1 PTDSS1 PTPN1 RELB SNRPC STAU1 SYNCRIP TBC1D1 TCF20 TMED2 UBE2L3 UBXN1 WDR43
Glutamine_starve_down	3.31449e-12	1.4008e-08	ABCF1 ADRM1 AMD1 ATP1B3 ATR BOP1 BZW1 CAD CALR DDX21 DHX15 DHX9 EIF2B5 EIF4G1 EIF5 ERF EXOSC9 FBL G3BP1 HNRNPAB HSP90AA1 HSPA8 HSPE1 IRF8 LDHA LPCAT1 MRPL23 NOLC1 ODC1 PA2G4 PDCD4 PFKP PGAM1 PSMB6 PTDSS1 PWP2 RANGAP1 RRP9 SF1 SLC4A7 SNRPB2 SYNCRIP TAP1 TIMM17A UBE2N UTP18	ABCF1 ADRM1 ARID4B ATP1B3 ATR BOP1 BZW1 CALR CAPRIN1 CHD4 DHX15 DHX9 EIF2B5 EIF4G1 EIF5 ERF FBL G3BP1 HNRNPAB HSPA8 HSPE1 IRF8 LDHA LPCAT1 MRPL23 NOLC1 ODC1 PA2G4 PFKP PGAM1 PSMB6 PTDSS1 PWP2 RANGAP1 SF1 SF3B4 SLC4A7 SNRPB2 SYNCRIP TAP1 UBE2N
Glutamine_starve_up		0.0125801	ACADVL ATPAF2 BCL9 BUD31 DRAP1 GNS GRHPR HEXA HSF1 MAP4K2 PEX10 PHF2 PRMT2 RDBP SLC1A5 SLC30A9 TPP1 TSPAN31 WIPI2	ACADVL ASS1 ATPAF2 BCL9 CABIN1 CDS2 DRAP1 FAM49A GNS GRHPR HEXA HSF1 ITPR2 MAP4K2 PEX10 PHF2 PLCL2 PTPRC SEC14L1 SLC30A9 SPAG9 TOR1AIP1 TPP1 TXN2 WIPI2
HIF1alpha_1.5x_down	0.00561402		ABCF2 AMDHD2 BOP1 CAD DBF4 DDX21 ELK1 HNRNPD IPO4 MTERFD1 NOLC1 OAZ1 ODC1 PA2G4 RANBP1 RBM28 RPP40 RRP9 RUVBL1 UBE2S	ABCF2 BOP1 HNRNPD NOLC1 OAZ1 ODC1 PA2G4 RANBP1 RPP40 RUVBL1 UBE2S
IKAROS_target_ChIPseq_Young_Ebert_Cell_11	0.000258271	5.21145e-11	ADAM10 ADAM9 ATF2 ATP1B3 BHLHE40 BOLA2 CCNI CNOT1 ETV6 FARS2 GALNT10 GNS GPSM3 HPS4 HSPA1B HSPD1 HSPE1 ITGAV KCTD5 LHPP LPCAT1 LRIG2 LYRM1 LZTFL1 MAT2A MTERFD1 MTMR3 NCOA1 NCOR2 NFATC1 NHP2L1 NIP7 PCGF3 PDCD4 PDCD6 PDXK PFKP PIP4K2B PLSCR1 POLR3D PPM1B PPP1CC PTDSS1 RALY RASA4 RPP40 RPSA RRP9 SLC25A22 SMARCD2 SRRD SYNCRIP TFAP4 TMBIM4 TMED2 TRIP12 TRPS1 UBFD1 UBR7 VOPP1 YIPF1	ADAM10 ADAM17 ADAM9 ATF2 ATP1B3 BHLHE40 BOLA2 CAPZA1 CCDC47 CCNI CD2BP2 CDC42 CDS2 CNOT1 COBLL1 EFCAB11 ETV6 FAM49B FAM63B GNS HERC3 HPS4 HSPD1 HSPE1 IKZF1 INPP4A ITGAV KCTD5 LPCAT1 LRIG2 LZTFL1 MAT2A MGRN1 MTMR3 N4BP2L1 NCOA1 NFATC1 NFKB1 NHP2L1 NOL10 P4HA1 PCGF3 PDE4D PDXK PFKFB3 PFKP PHLPP1 PIKFYVE PIP4K2B PLBD1 PLEKHM1 PLSCR1 POLR3D PPM1B PTDSS1 RALY RAPGEF1 RASA4 RIN3 RPL11 RPP40 RPSA SCAMP4…
IKZF1_CB_enhancer	0.0405209	3.23697e-08	BRI3BP CCND3 CDH23 COG8 DYNLL1 EXD2 GALNT6 GLRX5 GRHPR HIF1A IRF1 KLHDC4 MED29 MICALL1 MTIF3 MYCBP2 T15 NCOR2 NHP2L1 PRDM15 RPSA RUSC1 SLC1A5 SLC7A6 SPRED2 TMBIM4 TRIT1 USP22 VOPP1 VPS13C	ACSF3 AP1S3 BRI3BP CABIN1 CCDC9 CCND3 CHD2 CLIP2 CMIP CTCFL DYNLL1 ECE1 ELMO1 EH FAM49A GALNT6 GRHPR HIF1A IKZF1 IRF1 KLHDC4 LMTK3 MAP2K1 MICALL1 MTIF3 MTMR14 MYCBP2 MYO1E T15 NHP2L1 P4HA1 PAX5 PFKFB3 PLCG2 RAPGEF1 RIN3 RPSA SH3GL1 SLC38A1 SLC7A6 SMAD3 SPRED2 ST3GAL2 TK2 TMBIM4 TRAPPC9 TRIT1 USP22 VOPP1 VPS13C
IKZF1_CB_prom	0.000218347	1.94103e-05	ABHD13 ADAM10 ATAD3A BEND3 BRI3BP CCDC75 DCUN1D3 DDX59 DYNLL1 EARS2 EPT1 FAM129C FTO GLRX5 GNS HEATR5B HSPH1 LIG4 LYRM1 MAT2A MCM8 T15 NFKBIB NHP2L1 NTAN1 PA2G4 PIP4K2B PLSCR1 PPP1CC PPP1R12C PRKAB2 RELL1 RMND1 RPGRIP1L RPSA RUSC1 SCAR13 SIRT2 SLC1A5 SLC39A13 SMARCD2 SNHG10 SNRPC SP1 SPG21 SPRED2 TMBIM4 TRAM1 TRIP12 TRMT6 UBFD1 UBR7 USP22 VOPP1 VPS13C YIPF1	ADAM10 AHCYL2 AP1S3 BRI3BP CAPZA1 CCDC9 CD2BP2 CDC42 CDS2 DCUN1D3 DDX59 DYNLL1 EARS2 ELMO1 FXR1 GNB2 GNS HEATR5B MAT2A MGRN1 MTMR14 T15 NHP2L1 NOL10 NTAN1 P4HA1 PA2G4 PFKFB3 PHF23 PHLPP1 PIP4K2B PLSCR1 PPP1R12C PRKAB2 RELL1 RMND1 RPGRIP1L RPL11 RPSA RUNX3 SEC14L1 SIRT2 SLC39A13 SMAD3 SMARCD2 SNHG10 SNRPC SP1 SPAG9 SPG21 SPRED2 TMBIM4 TRAPPC9 TRIP12 TRMT6 U2AF2 UBFD1 UBR7 USP22 VOPP1 VPS13C WDFY2 …
IL10_OCILy3_Up		0.018166	CCND3 HIF1A ID2 PSMB9 TAP1	ARID5B BCAR3 BCL9L CCND3 CR2 FKBP15 HIF1A PFKFB3 PTPN1 SAMSN1 SESN3 TANK TAP1
IRF4_myeloma_induced_all		0.0145638	ABHD10 ADAM9 BCL2 CDK6 GRPEL2 HSP90AA1 INSIG1 ITPKA LDHA LONP1 MEX3A PIM2 SEC62 TNFRSF12A TRAM1	ACSS2 ADAM9 BCL2 CDK6 CDT1 DJB5 FAR1 FYN GFOD1 GRPEL2 ITPR2 KTN1 LDHA LONP1 MAN2A1 MMD OSBPL8 P4HA1 PIM2 SEC62 SLC2A1 TCF20 TMEFF1 TNFRSF12A TNNT1 WHSC1
IRF4_myeloma_induced_Lymphochip		0.0285534	ADAM9 BCL2 CDK6 HSP90AA1 INSIG1 PIM2 SEC62 TRAM1	ADAM9 BCL2 CDK6 FAR1 FYN ITPR2 KTN1 MAN2A1 MMD OSBPL8 PIM2 SEC62 WHSC1
Leucine_starve_down	2.00287e-05	0.00378996	ADRM1 AMD1 CAD CALR COPS2 DDX21 DHX9 DYNLL1 EIF4G1 EIF5 EXOSC9 HSP90AA1 HSPA8 HSPE1 LDHA LPCAT1 NXF1 PDCD4 PGAM1 TIMM17A UBE2N UBE2S WDR1	ADRM1 ARID4B CALR COPS2 DHX9 DYNLL1 EIF4G1 EIF5 ETF1 HSPA8 HSPE1 LDHA LPCAT1 NXF1 PGAM1 SF3B4 UBE2N UBE2S WDR1
ly1.enhancer.DISTAL.BCL6-SMRT.DRE.553		0.00609155	AGPAT5 ARAP2 ARL5A CDC42SE2 CPEB4 CTDP1 FCRL5 FFAR2 GLRX5 GRHPR HNRNPD ID2 IRF8 KLHDC4 MCTP2 MGAT5 MPEG1 NCOR2 POLR2D RASGEF1B SPRED2 TBL1XR1	ARAP2 ARID1B ARID5B ATP6V1G3 BCAR3 CAPZB CDC42SE2 CHD2 CHD7 CHSY1 COQ2 CTCFL CTDP1 EBF1 GFOD1 GRHPR HNRNPD HNRNPF IKZF1 IRF8 ITPR2 KLHDC4 LMO4 MAP2K6 MCTP2 MGAT5 NEDD9 PLCG2 PLCL2 POLR2D PTPRC RABAC1 RASGEF1B REL RUNX3 SAMSN1 SNX18 SNX5 SP4 SPRED2 TLE3 UBAC2
ly1.enhancer.INTRONIC.BCL6-SMRT.DRE.807	0.00438985	7.78576e-24	ABCC1 AP1B1 ARFIP1 ATXN1L BCL2 CCDC146 CCDC75 CDC42SE2 CDK6 CNST CREBBP CTNNBL1 DOCK10 EHD1 ETV6 FARS2 FMNL3 GNB1 HEATR5B HEATR7A HIF1A INPP5B IRF8 JAK1 KCTD5 KIF3B KLHL14 LCP1 LEMD3 LHPP LYRM1 MCCC1 MCTP2 MGAT5 MLL3 NF1 NFATC1 ODC1 OTUD5 PRDM15 SLC7A6 SPRED2 SPTLC2 SRD5A1 TBL1XR1 TCTEX1D2 TIPARP TMEM19 TRIP12 TRPS1 USP22 VOPP1 WIPI2 YIPF1	ABCC1 ADAM17 AKAP2 ANK3 AP1B1 AP1S3 ARFIP1 ARHGAP26 ARID5B ARPC1B ATXN1L BCL2 CAMK2D CAPZA1 CASK CDC42SE2 CDK6 CHD2 CHD7 CMIP CNST CREBBP CRTC3 CTNNBL1 DENND1B DENND5B DOCK10 EBF1 EHD1 ELMO1 ERP44 ETV6 FAM49A FMNL3 FNBP1 FNDC3A FYN GATAD2A GFOD1 GNB1 GPR133 HEATR5B HEATR7A HERC3 HIF1A INPP5B IRF8 ITPR2 JAK1 JMJD1C KCTD5 KIF3B LAMC1 LCP1 LMO4 LMTK2 MAP2K1 MAP2K6 MBNL2 MCCC1 MCTP2 MGAT5 MSN MYO1E N…
ly1.enhancer.INTRONIC.DISTAL.BCL6-SMRT.DRE.1275		1.52359e-19	ABCC1 AGPAT5 AP1B1 ARAP2 ARFIP1 ARL5A ATXN1L BCL2 CCDC146 CCDC75 CDC42SE2 CDK6 CNST CPEB4 CREBBP CTDP1 CTNNBL1 DOCK10 EHD1 ETV6 FARS2 FCRL5 FFAR2 FMNL3 GLRX5 GNB1 GRHPR HEATR5B HEATR7A HIF1A HNRNPD ID2 INPP5B IRF8 JAK1 KCTD5 KIF3B KLHDC4 KLHL14 LCP1 LEMD3 LHPP LYRM1 MCCC1 MCTP2 MGAT5 MLL3 MPEG1 NCOR2 NF1 NFATC1 ODC1 OTUD5 POLR2D PRDM15 RASGEF1B SLC7A6 SPRED2 SPTLC2 SRD5A1 TBL1XR1 TCTEX1D2 TIPARP …	ABCC1 ADAM17 AKAP2 ANK3 AP1B1 AP1S3 ARAP2 ARFIP1 ARHGAP26 ARID1B ARID5B ARPC1B ATP6V1G3 ATXN1L BCAR3 BCL2 CAMK2D CAPZA1 CAPZB CASK CDC42SE2 CDK6 CHD2 CHD7 CHSY1 CMIP CNST COQ2 CREBBP CRTC3 CTCFL CTDP1 CTNNBL1 DENND1B DENND5B DOCK10 EBF1 EHD1 ELMO1 ERP44 ETV6 FAM49A FMNL3 FNBP1 FNDC3A FYN GATAD2A GFOD1 GNB1 GPR133 GRHPR HEATR5B HEATR7A HERC3 HIF1A HNRNPD HNRNPF IKZF1 INPP5B IRF8 ITPR2 JAK1 JMJD1C …
ly1.promoter.BCL6.all.3140	7.8765e-10	1.2528e-19	ABHD10 ABHD13 ACIN1 ACSF2 ACSL4 ACTR2 ADAM10 ADAMTS13 ADNP AGPAT5 AKIRIN1 ANKRD13A ARL15 ARL5A ARL8A ATP6V0B ATP6V1C1 ATP6V1H ATR BCL2 BRI3BP BZW1 CAD CALR CCDC132 CCND2 CCNI CD164 CDK6 CENPP CHCHD8 CHORDC1 CNOT1 CNST COMMD7 COPS2 COPS7B COX8A CREBBP CRIPT DBF4 DBP DCUN1D3 DGAT2 DHX36 DLG1 E2F1 EIF2C3 EIF5 EPN1 ETV6 EXOSC9 FAM110A FASTKD1 FCRL5 FPGT FTSJD1 GADD45A GALK2 GLB1L GNS HAT1 HBXIP HEXA …	AAK1 ACIN1 ACSF2 ACSF3 ACSL4 ACTR2 ADAM10 ADAMTS13 ADNP ADSSL1 AHCYL2 AKAP12 AKAP2 AKIRIN1 ANK3 ANKRD13A ANO6 AP1S3 ARHGAP17 ARID4B ARID5B ARL15 ARL8A ATF6 ATG16L2 ATP6V0B ATP6V1C1 ATP6V1H ATR BAZ2B BCL2 BMP2K BRI3BP BZW1 CABIN1 CALR CAPZA1 CCDC132 CCDC162 CCND2 CCNI CCNL1 CD164 CD2AP CDK6 CDON CENPP CHD2 CHD7 CHORDC1 CNOT1 CNST COMMD10 COPS2 COPS7B COX8A CPSF6 CREBBP CREBL2 DBP DCUN1D3 DENND1B D…
ly1.promoter.BCL6.alone.906	0.000720658	0.00122319	ACSL4 ADAMTS13 ANKRD13A ARL5A ARL8A BZW1 CAD CALR CNOT1 COMMD7 DBF4 DCUN1D3 DHX36 EXOSC9 FCRL5 GLB1L GNS HAT1 LARP1 LARP4 LASP1 LCP1 LRRCC1 LYPLA2 LYRM1 MAOA MAPK9 MAPRE1 MBTD1 MCOLN1 MCTP2 MED29 MGAT5 MLL2 MPND NOC3L NR6A1 PAF1 PDCD4 PIH1D2 PIP4K2B POC5 PRKACB RALY SEC24B SEC62 SET SHF SLC25A40 SLC27A1 SPG21 SPTLC2 ST14 STAU1 STK16 TMEM66 TULP4 UBE2F UBE2G1 UBXN1 USP16 UTP18 ZFP106	ACSL4 ADAMTS13 AHCYL2 AKAP12 ANK3 ANKRD13A ARHGAP17 ARID4B ARL8A BZW1 CALR CAPZA1 CCDC162 CDON CHD2 CNOT1 COMMD10 DCUN1D3 DHX36 FAM49A FAR1 FBXO33 FBXO40 FGFR1OP2 FXR1 GNS KCMF1 KTN1 LARP4 LASP1 LCP1 LIMS1 LRRCC1 LYPLA2 MAP2K6 MAPK9 MAPRE1 MBNL2 MBTD1 MCOLN1 MCTP2 MGAT5 MLL2 MPND N4BP2 NOC3L PAX5 PIP4K2B POC5 RALY RSBN1L SEC62 SET SHF SLC25A40 SLC27A1 SPG21 ST14 STAU1 STK17B SYNPO2 TXN2 UBE2F UBE…
ly1.promoter.BCL6-BCOR.all.2142	2.20382e-06	9.31956e-16	ABHD10 ABHD13 ACIN1 ACSF2 ACTR2 ADAM10 ADNP AGPAT5 AKIRIN1 ARL15 ATP6V0B ATP6V1H ATR BCL2 BRI3BP CCDC132 CCND2 CCNI CD164 CDK6 CENPP CHCHD8 CHORDC1 CNST COPS2 COPS7B COX8A CREBBP CRIPT DBP DGAT2 DLG1 EIF2C3 EIF5 EPN1 ETV6 FAM110A FASTKD1 FPGT FTSJD1 GADD45A GALK2 HBXIP HEXA HIF1A HNRNPD HNRNPM HSPD1 HSPE1 HSPH1 ID2 INTS2 IPO4 IRF8 KLF9 KLHL14 LAMP1 LEMD3 LIG4 LONP1 LPCAT1 LRRIQ3 LYST MANBA MAT2A …	AAK1 ACIN1 ACSF2 ACSF3 ACTR2 ADAM10 ADNP ADSSL1 AKAP2 AKIRIN1 ANO6 AP1S3 ARID5B ARL15 ATF6 ATG16L2 ATP6V0B ATP6V1H ATR BAZ2B BCL2 BMP2K BRI3BP CABIN1 CCDC132 CCND2 CCNI CCNL1 CD164 CD2AP CDK6 CENPP CHD7 CHORDC1 CNST COPS2 COPS7B COX8A CPSF6 CREBBP CREBL2 DBP DENND1B DLG1 DOK3 DTX4 DUSP6 EBF1 ECE1 EIF2C3 EIF5 ELMO1 ETV6 FAM110A FNDC3A FOXP4 FPGT FTSJD1 GPR107 GSK3B HBXIP HEXA HIF1A HNRNPD HNRNPF H…
ly1.promoter.BCL6-BCOR.only.1783	5.70894e-06	3.76343e-15	ABHD10 ABHD13 ACIN1 ACSF2 ACTR2 ADAM10 AGPAT5 AKIRIN1 ARL15 ATP6V0B ATP6V1H ATR BCL2 CCDC132 CCND2 CCNI CD164 CDK6 CENPP CHCHD8 CHORDC1 CNST COPS2 COPS7B COX8A CREBBP CRIPT DGAT2 DLG1 EIF2C3 EIF5 ETV6 FAM110A FTSJD1 GADD45A GALK2 HBXIP HEXA HIF1A HNRNPD HNRNPM HSPD1 HSPE1 HSPH1 INTS2 IPO4 IRF8 KLF9 LAMP1 LEMD3 LONP1 LPCAT1 LYST MANBA MAT2A MCCC1 MFSD1 MRPL44 MTERFD1 CA NCEH1 NFKBIB NHP2L1 NOL8 NU…	AAK1 ACIN1 ACSF2 ACTR2 ADAM10 ADSSL1 AKIRIN1 ANO6 AP1S3 ARID5B ARL15 ATF6 ATG16L2 ATP6V0B ATP6V1H ATR BAZ2B BCL2 BMP2K CABIN1 CCDC132 CCND2 CCNI CD164 CD2AP CDK6 CENPP CHD7 CHORDC1 CNST COPS2 COPS7B COX8A CPSF6 CREBBP CREBL2 DENND1B DLG1 DOK3 DTX4 EBF1 ECE1 EIF2C3 EIF5 ELMO1 ETV6 FAM110A FNDC3A FOXP4 FTSJD1 GPR107 HBXIP HEXA HIF1A HNRNPD HNRNPF HSPD1 HSPE1 IKZF1 IRF8 ITPK1 ITPR2 KDM2B LAMC1 LAMP1…
Ly1_siBCL6_48h_upreg		0.00287602	ABHD10 ABHD13 ACAP2 ACSF2 AHDC1 ARL13B CAMSAP2 CASP6 CCDC146 CHRNB1 CREBBP DBP DOCK10 ETV6 FAM110A FTSJD1 GADD45A GPSM3 HIF1A IRF1 JAK3 KLF9 KLHDC8B KLHL14 LZTFL1 MCTP2 MOB4 NIPSP3B NR1D2 NTAN1 PAN3 PDCD4 PPP1R3F PPP4R1 PTBP2 RNF2 RNFT2 SAC3D1 SLC27A1 SLC35D2 SI1 TBX6 TCTEX1D2 TRPS1 UBE2F USP38 ZADH2	ACAP2 ACSF2 AHDC1 AIF1 ANO6 ARHGAP21 ARID5B ARL13B ATXN7L1 BMP2K CAMSAP2 CASP6 CHD2 CHRNB1 CPOX CREBBP CREBL2 CRTC3 DBP DNMT3A DOCK10 DUSP16 DYRK4 EBF1 ETV6 FAM110A FAM49A FTSJD1 GOLM1 GPR174 GTF2IRD2 HERC3 HIF1A IRF1 ITPR2 JMJD1C KLHDC8B LAMC1 LMO4 LMTK2 LRRC43 LZTFL1 MAP3K5 MCIN MCTP2 MDM1 MOB4 N4BP2 N4BP2L1 NIPA2 NIPSP3B NOD1 NOL9 NRIP1 NRP2 NTAN1 PAN3 PDE4D PHLPP1 PKIG PLAU PLBD1 PLCL2 PPP4R1…
Myc_ChIP_PET_2plus	0.0128221	6.09967e-11	ABT1 ADRM1 AGPAT6 AGTPBP1 AKIRIN1 APPL1 ARFIP1 ARL5A ARL8B ARSA ATAD5 ATP6V1C1 BCL2 BICD2 BRI3BP CCND2 CCND3 CDK4 CDKN2AIP CEP68 CEP78 CHCHD8 CHIC2 CLEC16A CORO7 CREBBP CRNKL1 CS DHX15 DHX37 DJC15 DOCK10 DOLK DPH1 DYRK1B EHD1 EIF5 ELL ETV6 FAM129C FBXL6 FOXK1 FTO GNB1 GPHN GRHPR GRPEL1 GRPEL2 GTPBP10 HBS1L HNRNPAB HNRNPM HS1BP3 HSPA8 HSPH1 INSIG1 KHDRBS1 KLF11 KLHDC4 KLHL14 LARP4 LASP1 LDHA LHPP …	AAK1 ADRM1 AGPAT6 AGTPBP1 AHCYL2 AKAP12 AKAP2 AKIRIN1 ANK3 APP ARFIP1 ARHGAP26 ARPC1B ASS1 ASXL2 ATF6 ATG16L2 ATP6V1C1 B4GALT1 BCL2 BRD4 BRI3BP CABIN1 CAPRIN1 CAPZB CCND2 CCND3 CCNL1 CDKN2AIP CHD2 CHIC2 CHST10 CHSY1 CMIP CORO7 CPOX CREBBP CRNKL1 CS DAP DENND1A DENND4A DENND5B DEPDC5 DHX15 DHX37 DJC15 DOCK10 DPH1 DSCAM DTX4 EHD1 EIF5 ELL ELMO1 EH ETV6 EXTL3 FAM49B FAM63B FBXO40 FGR FNBP1 FOXK1 FOX…
Myc_ChIP_PET_Expr_Down		2.59532e-05	BCL2 DOCK10 EHD1 ETV6 KLHL14 LASP1 NFATC1 SF1 SI3 SPRED2 VAV2	ARPC1B ATG16L2 B4GALT1 BCL2 CABIN1 DEPDC5 DOCK10 EHD1 ETV6 FNBP1 FOXP4 FTSJD2 IKZF1 ITPR2 LASP1 NCOA2 NFATC1 PAX5 PTPRC RAPGEF1 SEC14L1 SEMA4D SF1 SOCS1 SPRED2 SRGN TLE3 TRIM8 VAV2 WDFY2
Myc_ChIP_PET_Expr_Up	3.95753e-05	0.000546191	ARL5A BICD2 CDK4 CHCHD8 DHX15 DHX37 FBXL6 GPHN GRPEL1 GRPEL2 GTPBP10 HNRNPAB LDHA METAP1 MRPL23 MRPS7 MSTO1 NOL6 NOLC1 NPM1 PA2G4 PGAM1 PNPO PWP1 QTRT1 RANGAP1 RAP1GDS1 RUVBL1 SAE1 SNRPB2 SYNCRIP TMEM135 TRNT1 TTC3 TXNRD1 U2AF1 YBX1 ZHX1	APP ASS1 CAPRIN1 DHX15 DHX37 GOLM1 GPHN GRPEL2 GTPBP10 HNRNPAB HNRNPF KCMF1 KP4 LDHA MND1 MRPL23 NIN NOL10 NOL6 NOLC1 NPM1 PA2G4 PGAM1 PWP1 QTRT1 RANGAP1 RAP1GDS1 RUVBL1 SNRPB2 SNX5 SYNCRIP TKT TTC3 TXNRD1 U2AF1 YBX1 ZHX1
Myc_overexpression_1.5x_up	1.68251e-06		AGPAT5 BOP1 CCDC86 CDK4 CIRH1A DDX10 HSPD1 IPO4 NOL6 NOLC1 PA2G4 RCL1 RPP40 RRP9 TAF4B TFB2M UTP14A	BOP1 CIRH1A HSPD1 NOL6 NOLC1 PA2G4 RCL1 RPP40 UTP14A
Myc_Targets	2.53593e-07	4.42269e-06	ABT1 ADAM9 AHCYL1 AMD1 AMPD2 APBA3 ATP1B3 ATR BAX BAZ1B BCL2 BOP1 BZW1 CAD CALR CASP8AP2 CCND2 CCND3 CCNH CCT8 CD164 CDK4 CDK6 CHRNB1 CRIPT CSF2RB CSTB DBP DCTN3 DDX10 DDX21 E2F1 ELK1 ELL EPHX1 FBL GADD45A GNS GOLPH3 HDGF HIF1A HSPA8 HSPD1 HSPE1 ID2 IREB2 LAMP1 LANCL1 LDHA LZTFL1 MAFF MAPRE1 MAT2A MKNK1 MTERF CA GA GPA NFKBIB NOLC1 NPM1 NR6A1 OAZ1 ODC1 PA2G4 PIGF PLOD3 PPP1R7 PRKAB2 PSMD7 PTDSS1 …	ADAM9 AHCYL1 AMPD2 APBA3 APP ATF6 ATP1B3 ATR BAX BAZ1B BCL2 BOP1 BZW1 CALR CAPZA1 CASP8AP2 CCND2 CCND3 CCT8 CD164 CD2AP CDK6 CEPT1 CHRNB1 CR2 CREBL2 CSF2RB DBP DCTN3 ELL EPHX1 ETF1 FBL FXR1 G12 GNS GSK3B HDGF HIF1A HSPA8 HSPD1 HSPE1 IREB2 ITGAL LAMP1 LDHA LZTFL1 MAFF MAN2A1 MAP3K5 MAPRE1 MAT2A MSN MTERF CA GA GPA NOD1 NOLC1 NPM1 OAZ1 ODC1 PA2G4 PIGF POU2F1 PPP1R7 PREP PRKAB2 PSMD7 PTDSS1 PTPN1 PW…
NB_GCB_Progression_All_Genes_RPKM_enhancer_loss_minus3_minus4		1.73509e-11	ADAM10 ADAMTS13 AGPAT5 AGTPBP1 AP1B1 ARGLU1 BCL2 CCND2 CCNI CREBBP CRY2 HECA HEXA HIF1A HNRNPD IRF1 ITPR1 KDM6A MCTP2 PFKP SP1 SPTLC2 TGFB3 TRAM1 TULP4 ZFR2	ADAM10 ADAMTS13 AGTPBP1 AP1B1 ARGLU1 ARHGAP26 ARID4B ATP6V1G3 B4GALT1 BCL2 CAMK2D CCND2 CCNI CDC42 CHD4 CHSY1 COQ2 CREBBP CRY2 DENND5B DUSP6 E2F3 ERGIC1 FNDC3A GPR174 HECA HEXA HIF1A HNRNPD IRF1 ITPR1 KDM2B KDM6A KLRAQ1 LASS4 MAP3K5 MCTP2 NIN NOD1 OSBPL8 PFKP PION PTPN1 RBMS1 RIN3 RLF SCAMP4 SDCCAG8 SELPLG SLC29A3 SP1 SP4 STIM1 STK17B TBC1D1 UBASH3B WDFY2 ZFR2
NB_GCB_Progression_All_Genes_RPKM_minus2	0.0245489	5.10976e-06	AACS ABHD10 ADAMTS13 ADPGK AGPAT5 AGTPBP1 AP1B1 CCNI CHKA CIC CPEB4 CRY2 CTDP1 DJC3 EDARADD EIF4G1 FTO GALNT6 HEATR5B HIF1A HSF1 JAK1 KLF11 KLF9 LARP1 LARP4 LYRM4 LYST LZTFL1 MYCBP2 MYST3 NF1 NOC3L OAZ1 PATL1 PFKP PGM2 PHF20L1 PLSCR1 POLD1 PRKX PTDSS1 PTGES3 PUM2 RAD23B RANBP3 RAP1GDS1 RCL1 RNMT RPL3 RPS6KA3 RRAGC SEC63 SF3A2 SLC6A6 SMYD4 SI1 SNX10 SP1 SRRM2 ST14 TAF1B TEX10 TGFB3 TGIF2 TMEM66 TR…	AACS AAK1 ADAMTS13 ADPGK AGTPBP1 AHCYL2 AP1B1 APP CCNI CHD4 CHKA CHSY1 CIC CRY2 CSF3R CTDP1 DENND5B DJC3 E2F3 EDARADD EIF4G1 EH FNDC3A GAD1 GALNT6 GGNBP1 GPR133 HEATR5B HIF1A HSF1 JAK1 KCMF1 KCTD7 KLRAQ1 LAMC1 LARP4 LATS2 LYRM4 LYST LZTFL1 MAP4K1 MYCBP2 MYST3 NIN NOC3L NOD1 NRIP1 OAZ1 PATL1 PAX5 PFKP PHF23 PLBD1 PLSCR1 POLD1 PRKG1 PRKX PTDSS1 PTGES3 PUM2 RAB2A RAD23B RANBP3 RAP1GDS1 RAPGEF1 RCL1 …
NB_GCB_Progression_All_Genes_RPKM_minus5		1.28285e-08	ADAM10 ARGLU1 BHLHE40 BICD2 CCND2 GALNT10 HECA HEXA HNRNPD IRF1 ITPR1 KDM6A LCP1 LEMD3 MCTP2 MPEG1 NCOR2 SPTLC2 TRPS1 VAV2	ADAM10 ARGLU1 ARID4B ATP6V1G3 B4GALT1 BHLHE40 CCND2 CDC42 CHST10 CMIP COBLL1 COQ2 CRTC3 DNMT3A DUSP6 ERGIC1 G12 HECA HEXA HNRNPD IRF1 ITPR1 KDM2B KDM6A LCP1 MAP3K5 MCTP2 OSBPL8 PKIG RBMS1 RLF SDCCAG8 SELPLG SLC38A1 SNX18 SP4 TBC1D1 TRPS1 VAV2
P300_ly1_enhancer		9.14878e-11	AACS ABCC1 AGPAT6 AHDC1 AMPD2 AP1B1 ARAF ARAP2 BCL2 BCL9 BICD2 CDH23 COX4I1 CPEB4 CSNK1E DTX1 E2F1 ELK1 EPN1 FARS2 FMNL3 GADD45A GNB1 GRHPR ID2 IRF8 JAK1 KLHDC4 LHPP LYRM1 MAPK8IP3 MCCC1 MCTP2 MGAT5 MPEG1 MYCBP2 NFATC1 OTUD5 PDCD6 PDXK POLD1 POLR2D PRDM15 PRKAR1A RNFT2 RPS5 SPRED2 SRD5A1 SUSD3 TM2D1 TRIT1 TRPS1 U2AF1 VOPP1	AACS ABCC1 ACSF3 AGPAT6 AHDC1 AKAP2 AMPD2 ANK3 AP1B1 AP1S3 ARAP2 ARID1B ARID5B ARPC1B ATG16L2 BCL2 BCL9 CABIN1 CAMK2D CDON CHD2 CHD7 CMIP CRTC3 CSNK1E CTCFL DOK3 DTX1 EBF1 ECE1 FGR FMNL3 FNBP1 GATAD2A GFOD1 GL GNB1 GPR107 GRHPR IRF8 JAK1 KLHDC4 LAMC1 LASS4 LMTK2 MAP2K6 MAPK8IP3 MCCC1 MCTP2 MGAT5 MND1 MORF4L1 MSN MYCBP2 MYO1E NFAM1 NFATC1 NIN OTUD5 PAX5 PDXK PKIG PLCG2 POLD1 POLR2D PPP1R13B PPP5C …
P300_ly1_prom	3.01304e-06	5.69012e-05	ABHD13 ACTB ADPGK AGPAT6 AKIRIN1 AMPD2 ANKRD13A ARAF ARL8B ATP6V1H BCL9 BNIP1 BUD31 BZW1 CCND3 CD164 CENPP CHMP1B CLEC16A COPS2 CSTB DBP DCUN1D3 DGAT2 DJC3 DRAP1 DVL2 E2F1 EIF2C3 EIF5 ELK1 ELL EPN1 FAM110A FAM129C GALK2 GALNT10 GLRX5 GRHPR HEXA HPS4 IPO4 KCTD5 LAMP1 LARP4 LIG4 LPCAT1 LYRM1 MAOA MAPK8IP3 MAT2A MBTD1 MRPL44 MTCH1 MTERFD1 MTIF3 MYCBP2 MYST3 NOL8 NR6A1 ODC1 PDAP1 PER2 PIN1 PIP4K2B PO…	ADPGK AGPAT6 AKIRIN1 AMPD2 ANKRD13A AP1S3 ATG16L2 ATP6V1H BCL9 BNIP1 BZW1 CCND3 CCNL1 CD164 CDON CDT1 CENPP COPS2 DBP DCUN1D3 DJC3 DOK3 DRAP1 DUSP6 EIF2C3 EIF5 ELL FAM110A FBXO33 FGR FXR1 GL GNB2 GRHPR HEXA HPS4 KCTD5 KTN1 LAMP1 LANCL2 LARP4 LASS4 LPCAT1 MAP2K1 MAPK8IP3 MAT2A MBTD1 MGRN1 MND1 MORF4L1 MTCH1 MTIF3 MTMR14 MYCBP2 MYST3 NOL8 NOL9 ODC1 PDAP1 PER2 PIN1 PIP4K2B POLDIP3 PPP1R13B PPP5C PRK…
Proliferation_DLBCL	5.25712e-10	1.43275e-07	ACTB ACTR2 ATP6V0B BNIP1 BUD31 BZW1 CAD CALR CCDC146 CCDC86 CCNH CD164 CDK4 CS CTNNBL1 CWC15 DENR DTX1 DVL2 EIF4G1 EIF5 ELK1 FAM160B2 FBL GNB1 HDGF HMGN1 HSP90AA1 IREB2 KLHL14 LDHA MAPRE1 MAT2A NCAPG2 NOLC1 NPM1 ODC1 PA2G4 PGAM1 POLR1C PPP1CC PPP4C PRELID1 PRKAR1A PTDSS1 PTGES3 RAD23B RALY RDBP RPA1 RPL13 RPLP0 RPS12 RPS16 RPS5 RPSA SENP3 SET SLC26A2 SP1 TCEB2 TMEM41B TMEM50A TUG1 TXNRD1 UBA1 UBE…	ACTR2 ATP6V0B BNIP1 BRD4 BZW1 CALR CCDC47 CD164 CDT1 CEPT1 CS CTNNBL1 DTX1 E2F3 EIF4G1 EIF5 ELMO1 FAR1 FBL GNB1 HDGF IKZF1 IREB2 LDHA MAPRE1 MAT2A NFKB1 NOLC1 NPM1 ODC1 PA2G4 PGAM1 POLR1C PRELID1 PRKAR1A PTDSS1 PTGES3 RAD23B RALY RAP1B RBX1 RPA1 RPL11 RPL13 RPLP0 RPS16 RPS5 RPSA SENP3 SET SF3B4 SLC26A2 SOCS1 SP1 TCEB2 TMEM41B TMEM50A TRAF2 TUG1 TXNRD1 UBA1 UBE2S USP22 WHSC1 YWHAE
Proliferation_Node1640	0.0147694	0.0493231	CCT8 DHX15 HAT1 HMGN1 HSP90AA1 NPM1 SERBP1 ZC3H15	CCT8 DHX15 FXR1 NPM1 RPL11 SERBP1 ZC3H15
PU.1_CB_enhancer	3.01304e-06	6.8485e-46	AACS ABCC1 ABT1 ACAP2 ACSL4 ACTB ACTR2 ADAM9 ADAMTS13 ADPGK AGPAT5 AGPAT6 AGTPBP1 AHCYL1 AIG1 AKIRIN1 AMDHD2 AMPD2 ANKRD13A ANXA5 AP1B1 AP2S1 APH1B ARAP2 ARFGEF2 ARFIP1 ARGLU1 ARL15 ARL5A ARMC6 ARNTL ARSA ATP1B3 ATP6V0B ATP6V1C1 ATP6V1H ATXN1L BAZ1B BCL2 BHLHE40 BICD2 BTBD9 CAC1F CCDC146 CCDC75 CCDC86 CCND2 CCND3 CDC42SE2 CDH23 CDK6 CDKN2AIP CENPP CEP68 CHKA CISD1 CLEC16A CNOT1 CNST CORO7 COX4I1 …	AACS AAK1 ABCC1 ACAP2 ACOT11 ACSF3 ACSL4 ACTR2 ADAM17 ADAM9 ADAMTS13 ADPGK AGAP2 AGPAT6 AGPAT9 AGTPBP1 AHCYL1 AKAP2 AKIRIN1 AMPD2 ANK3 ANKRD13A ANO6 ANXA5 AP1B1 AP1S3 AP2S1 APP ARAP2 ARFGEF2 ARFIP1 ARGLU1 ARHGAP17 ARHGAP26 ARID1B ARID4B ARID5B ARL15 ARPC1B ATG16L2 ATP1B3 ATP6V0B ATP6V1C1 ATP6V1G3 ATP6V1H ATXN1L ATXN7L1 B4GALT1 BAZ1B BCAR3 BCL2 BCL9L BHLHE40 BMP2K BRD4 BTBD9 CABIN1 CAMK2D CAPZA1 C…
PU.1_CB_prom	3.87002e-18	7.78576e-24	AATF ABCC1 ABT1 ACAP2 ACSL4 ACTR2 ADAMTS13 ADPGK AHCYL1 AKIRIN1 ALKBH3 AMDHD2 AMPD2 ANKRD13A AP1B1 AP2S1 ARFIP2 ATP6V0B ATP6V1C1 BICD2 BUD31 BZW1 CCND3 CCNI CDKN2AIP CENPP CHMP1B CHPF2 CISD1 CNOT1 CNST COG8 COPS7B CORO7 COX6A1 CSF2RB CTNNBL1 CTU2 DAZAP1 DCPS DCUN1D3 DDX21 DHX36 DHX9 DJC3 DSE1L3 DPH1 DPP7 DTX1 DYNLL1 E2F1 EIF2B5 EIF5 ELL EPN1 ERF EXOSC1 EXOSC9 FAM110A FAM129C FAU FBL FBXO34 FCRL5 …	ABCC1 ACAP2 ACSL4 ACTR2 ADAMTS13 ADPGK AGAP2 AHCYL1 AHCYL2 AKIRIN1 AMPD2 ANKRD13A AP1B1 AP1S3 AP2S1 ARFIP2 ARHGAP17 ARID4B ARID5B ATG16L2 ATP6V0B ATP6V1C1 ATXN7L1 B4GALT1 BCAR3 BTBD19 BZW1 CAMK2D CAPZA1 CCND3 CCNI CD2AP CD2BP2 CDC42 CDKN2AIP CENPP CISD1 CMAH CNOT1 CNST COPS7B CORO7 COX6A1 CSF2RB CTNNBL1 DAZAP1 DCUN1D3 DENND1B DENND4A DEPDC5 DHX36 DHX9 DJC3 DSE1L3 DOK3 DPH1 DTX1 DYNLL1 EBF1 ECE1 E…
PU.1_NB_enhancer	5.70894e-06	6.0244e-44	AACS ABCC1 ACAP2 ACSL4 ACTB ACTR2 ADAM9 ADAMTS13 ADNP2 ADPGK AGPAT5 AGPAT6 AGTPBP1 AHCYL1 AIG1 AKIRIN1 ALG1 AMD1 AMPD2 ANKRD13A ANXA5 AP1B1 AP2S1 ARAP2 ARFGEF2 ARFIP1 ARGLU1 ARL15 ARL5A ARL8A ARMC6 ARNTL ARSA ATP1B3 ATP6V0B ATP6V1C1 ATP6V1H ATPAF2 ATXN1L BAZ1B BCL2 BHLHE40 BICD2 BRI3BP BTBD9 CCDC146 CCDC75 CCDC86 CCND2 CCND3 CDC42SE2 CDH23 CDK2AP1 CDK6 CDKN2AIP CENPP CEP68 CEP78 CHKA CISD1 CLEC16…	AACS AAK1 ABCC1 ACAP2 ACSF3 ACSL4 ACTR2 ADAM17 ADAM9 ADAMTS13 ADNP2 ADPGK AGPAT6 AGPAT9 AGTPBP1 AHCYL1 AKAP2 AKIRIN1 ALG1 AMPD2 ANK3 ANKRD13A ANO6 ANXA5 AP1B1 AP1S3 AP2S1 APP ARAP2 ARFGEF2 ARFIP1 ARGLU1 ARHGAP17 ARHGAP26 ARID1B ARID4B ARID5B ARL15 ARL8A ARPC1B ASXL2 ATG16L2 ATP1B3 ATP6V0B ATP6V1C1 ATP6V1G3 ATP6V1H ATPAF2 ATXN1L ATXN7L1 B4GALT1 BAZ1B BAZ2B BCAR3 BCL2 BCL9L BHLHE40 BMP2K BRD4 BRI3B…
PU.1_NB_prom	4.58236e-20	2.74882e-25	AATF ABT1 ACAP2 ACSL4 ACTB ACTR2 ADPGK AGTPBP1 AHCYL1 AKIRIN1 ALG1 ALKBH3 AMDHD2 AMPD2 ANKRD13A AP1B1 AP2S1 ARFIP2 ARL8A ARMC6 ATP6V0B BICD2 BRI3BP BUD31 BZW1 CCND3 CCNI CCT8 CD164 CDKN2AIP CENPP CEP68 CHMP1B CHPF2 CISD1 CNOT1 CNST COG8 COPS7B COX6A1 CREBBP CSF2RB CTU2 DAZAP1 DBP DCPS DCUN1D3 DDX21 DDX59 DHX15 DHX36 DJC3 DSE1L3 DPH1 DTX1 EIF2B5 EIF5 ELL EPN1 EPT1 ERF ESR1 EXOSC1 EXOSC9 FAM110A FA…	ACAP2 ACSL4 ACTR2 ADPGK AGTPBP1 AHCYL1 AHCYL2 AKIRIN1 ALG1 AMPD2 ANKRD13A AP1B1 AP1S3 AP2S1 ARFIP2 ARHGAP17 ARID4B ARID5B ARL8A ATG16L2 ATP6V0B ATXN7L1 B4GALT1 BCAR3 BRI3BP BTBD19 BZW1 CAMK2D CAPZA1 CASC5 CCND3 CCNI CCT8 CD164 CD2AP CD2BP2 CDC42 CDKN2AIP CENPP CEPT1 CHD2 CISD1 CMAH CNOT1 CNST COBLL1 COMMD10 COPS7B COX6A1 CREBBP CSF2RB DAZAP1 DBP DCUN1D1 DCUN1D3 DDX59 DENND1A DENND1B DENND4A DEPDC…
PU.1_target_ChIPseq_Ebert_Cell_11	3.92261e-11	2.38045e-39	ABCC1 ABT1 ACAP2 ACTB ACTR2 ADAM10 ADPGK AGPAT1 AGPAT5 AGTPBP1 AMPD2 AP1B1 APPL1 ARAP2 ARFIP1 ARMCX3 ARNTL ATF2 ATP6V0B ATP6V1C1 ATP7A ATPAF2 BAX BAZ1B BCL2 BICD2 BOLA2 CCDC132 CCDC146 CCND2 CCND3 CCNI CD164 CDC42SE2 CDK6 CEP68 CHKA CSF2RB CSRP1 CTNNBL1 DCPS DDX10 DDX21 DJC15 DJC3 DOCK10 DPH1 DUSP4 DYNC1H1 DYNLL1 E2F1 EIF2B5 EIF5 ESR1 ETV6 FARS2 FAU FBXO34 FTO GALK2 GALNT10 GGA3 GLB1L GNB1 GNS GP…	AAK1 ABCC1 ACAP2 ACTR2 ADAM10 ADPGK AGAP2 AGPAT1 AGTPBP1 AHCYL2 AIF1 AMPD2 ANK3 AP1B1 APP ARAP2 ARFIP1 ARHGAP26 ARID4B ARID5B ARMCX3 ARPC1B ASXL2 ATF2 ATF6 ATP6V0B ATP6V1C1 ATP7A ATPAF2 B4GALT1 BAX BAZ1B BAZ2B BCAR3 BCL2 BMP2K BOLA2 CAMK2D CAPZB CASK CCDC132 CCND2 CCND3 CCNI CD164 CD2AP CDC42 CDC42SE2 CDK6 CEPT1 CHD7 CHKA COMMD10 CPOX CREBL2 CSF2RA CSF2RB CSRP1 CTNNBL1 CYFIP1 DAP DCUN1D1 DENND4A …
Quiescence_heme_all		7.12826e-05	ADPGK ATR BICD2 EIF5 GPSM3 HNRNPAB KLF9 MARK2 MED29 MYCBP2 GPA NCOA1 NXF1 PPP1R12C SAP18 SLC10A3 SLC39A13 UBL3 VPS13C	ADPGK ARID4B ATR CREBL2 EIF5 HNRNPAB JMJD1C MARK2 MSRA MYCBP2 GPA NCOA1 NRIP1 NXF1 OSBPL8 PLCL2 PPP1R12C PTPRC RBMS1 RSU1 SAP18 SELPLG SLC10A3 SLC39A13 SP23 TNFAIP8 TOR1AIP1 UBL3 VPS13C YPEL3
Intron_loss.ATAC.reads_CREBBP.KD		0.00174452	AP1B1 BCL2 BICD2 CDK6 CSF2RB DTX1 FAM129C FARS2 HS1BP3 JAK1 LHPP MCTP2 OTUD5 PGM1 PKIB RNFT2 RNGTT SUMF1 SUSD3 TRIM14 VAV2	ACSF3 AP1B1 BCL2 CCDC9 CDK6 CMIP CSF2RB DTX1 HIPK2 HS1BP3 ITPR2 JAK1 KLF16 MCTP2 MYOF OTUD5 PAX5 PGM1 PKIB RAPGEF1 RNGTT SEMA4D SMAD3 SNX30 ST3GAL2 SUMF1 SUSD3 VAV2 XYLT1
shCrebbp.up_995	0.00655491	1.44266e-08	ABT1 ACSL4 ADNP APPL1 ARFGEF2 ATP7A BICD2 CAMSAP2 CIC CLEC16A CREBBP DJC3 DYNC1H1 EPB4.1 EPT1 GM16853 HNRNPD HSF2 IREB2 ITGAV ITPR1 IVD KDM2A KLF11 LARP1 LRRCC1 LYST MAOA MARK2 MBTD1 MCCC1 MOB3C MPP5 MTMR3 MYCBP2 MYSM1 NBEAL1 NCOR2 NR1D2 NUP214 PATL1 PDXDC1 PHF20L1 PIM2 PRKAR1A PTBP2 PUM2 RPS6KA3 SEC24B SF1 SLC25A42 SRRM2 SSFA2 STAU1 TAF3 TBL1XR1 TECPR2 TNPO2 TRIP12 TRP53BP1 TRP53RK TUG1 TULP4 UB…	AAK1 ACSL4 ADNP ARFGEF2 ARHGAP17 ARHGAP21 ARID4B ASXL2 ATF6 ATP7A BAZ2B BRD4 CAMSAP2 CDS2 CHD4 CHD7 CIC CMAH CREBBP CRTC3 DENND1B DENND5B DJC3 DYNC1H1 EH EPB4.1 FAM63B FAR1 FNBP1 FNDC3A GM15800 GOLM1 GSK3B HIPK2 HNRNPD INPP4A IREB2 ITGAV ITPR1 ITPR2 IVD JMJD1C KDM2A KP4 LRBA LRRCC1 LYST MARK2 MBTD1 MCCC1 MTMR3 MYCBP2 MYSM1 NBEAL1 NIN NSD1 NUP214 OSBPL8 PATL1 PDXDC1 PHLPP1 PIK3CA PIKFYVE PIM2 POU2…
shCrebbp.down_1028	1.06222e-21	8.08125e-11	1110065P20RIK 2310036O22RIK ACTB ACTR6 ADPGK AKR7A5 AP2S1 ATP1B3 ATP5A1 BAX BOLA2 BPNT1 CALR CDK2AP1 CDK4 COG8 COPS7B COX4I1 COX6A1 COX8A CSNK1E CSRP1 CTU2 CUEDC2 CWC15 DAZAP1 DBP DCTN3 DRAP1 DTX1 DYNLL1 E430018J23RIK EMC6 FAM110A FAU FCRL5 FFAR2 FRMD8 GADD45G GM2518 GPI1 GPSM3 GTF2H4 H2-Q8 HEXA HMGN1 HSPE1 HSPH1 IFT27 ISOC2A KLHDC4 LDHA LY6D MED28 MFSD5 MPND MRPL14 MRPL2 MRPL20 MRPL23 MRPS7 MTCH…	2310036O22RIK ACSF3 ACTR6 ADPGK AIF1 AP2S1 ARPC1B ATP1B3 ATP5A1 BAX BOLA2 BPNT1 CALR CD80 COPS7B COX6A1 COX8A CSNK1E CSRP1 CUEDC2 DAZAP1 DBP DCTN3 DRAP1 DTX1 DYNLL1 FAM110A FAU FGR FRMD8 GADD45G GPI1 H2-Q8 HEXA HSPE1 IFT27 ISOC2A KLHDC4 LDHA LY6D MAP2K1 MED28 MFSD5 MPND MRPL14 MRPL23 MTCH1 MYEOV2 MYL4 CA NDUFA5 NDUFS4 NHP2L1 NPM1 OAZ1 ODC1 OSBPL5 P2RX7 PA2G4 PDAP1 PGM1 PPFIBP2 PPP5C PRELID1 PSMB6…
shEp300.up_783	0.0119089	1.61804e-09	ACSL4 ADNP APPL1 ARFGEF2 ATAD5 BBS12 BEND3 CAMSAP2 CIC CREBBP DYNC1H1 EPB4.1 HECA HSF2 IREB2 ITGAV LARP1 LYST MAOA MBTD1 MPP5 MTMR3 MTOR MYCBP2 MYSM1 NBEAL1 NR1D2 NR6A1 NUP214 PHF20L1 PRKAR1A PTBP2 RPS6KA3 SEC24B SLC25A42 SLC4A7 SP1 SRSF10 STAU1 TAF3 TBCEL TBL1XR1 TNPO2 TRIP12 TRP53BP1 TULP4 UBE2Z UBR3 VPS13C VPS41 ZC3H13 ZFP106 ZFP148 ZHX1 ZYG11B	1110037F02RIK 4930519G04RIK AAK1 ACSL4 ADNP APP ARFGEF2 ARHGAP21 ARID4B ATXN7L1 BAZ2B BMP2K CABIN1 CAMSAP2 CHD4 CHD7 CIC CMAH CPOX CREBBP CRTC3 DENND5B DYNC1H1 EBF1 EH EPB4.1 FAM63B GFOD1 GM15800 GSK3B HECA HIPK2 IREB2 ITGAV ITPR2 KCTD21 KTN1 LAMC1 LIMS1 LMTK2 LRBA LYST MBTD1 MOB1A MTMR3 MTOR MXD1 MYCBP2 MYSM1 NBEAL1 NIN NSD1 NUP214 OSBPL8 PIK3CA POU2F1 PRKAR1A PTBP2 RALGAPA2 REST RLF RNF216 RPS6…
shEp300.down_636	4.22359e-14	1.3917e-07	4930414L22RIK ACTB ADPGK AKR7A5 AMDHD2 ATP5A1 BAX CALR CIRH1A COX8A CSRP1 CTU2 CWC15 DCPS DPP7 DYNLL1 E230016M11RIK FCRL5 GALNT6 GPI1 GPSM3 GTF2H4 HEXA HSP90AA1 HSPA8 HSPH1 KDM6A KLHDC4 LY6D MAT2A MED28 MRPL14 MRPS7 MYO6 CA NDUFA7 NFKBIE NHP2L1 NPM1 OAZ1 ODC1 PKIB POLR3D PPP4C PRELID1 RANBP1 RPL13 RPL14 RPL18A RPL3 RPLP0 RPS10 RPS12 RPS16 RPS28 RPS5 RPSA RUVBL1 SCAR13 SERF2 SIRT2 SLC35B2 SRSF2 ST…	ADPGK ARPC1B ATP5A1 BAX CALR CIRH1A COX8A CR2 CSRP1 DUSP6 DYNLL1 E230016M11RIK GALNT6 GPI1 HEXA HSPA8 KDM6A KLHDC4 LY6D MAP2K1 MAT2A MED28 MRPL14 CA NHP2L1 NPM1 OAZ1 ODC1 OSBPL5 PKIB POLR3D PPFIBP2 PPP5C PRELID1 RABAC1 RANBP1 RELB RPL11 RPL13 RPL18A RPL3 RPLP0 RPS10 RPS16 RPS5 RPSA RUVBL1 SERF2 SIRT2 SLC25A28 SRSF2 TANK TAP1 TIMM8A1 TK2 TMBIM4 TMEM50A TMEM55B U2AF1 UBA52 UBE2I UBE2S UBXN1 XAB2 ZD…
c1.Ep300.up_381	7.59704e-05	0.0380323	AIG1 ARSA ATP6V0B BAX CCDC146 CLTB COMMD7 CORO7 COX8A DCPS FOXK1 HAUS5 HAUS7 LPAR2 LYPLA2 LYRM4 MAOA METAP1D MKNK1 GA GPA NDUFA7 NUDT16L1 NUDT7 PLEKHJ1 PPP4C RAB11B RPUSD1 SLC38A7 SPNS1 SRD5A1 STUB1 SUMF2 TAF10 TFAP4 WDR1 ZDHHC12 ZFYVE21	ATP6V0B BAX CD2BP2 CORO7 COX8A DUSP16 FOXK1 HAUS5 HAUS7 HIPK2 LPAR2 LYPLA2 LYRM4 METAP1D MGRN1 GA GPA NUDT7 PLEKHJ1 PPP5C PVT1 RAB11B RPUSD1 RSU1 SLC38A7 SOCS1 STUB1 SUMF2 TFAP4 WDR1
c1.Ep300.down_692		0.00904086	ACSL4 ADAM9 AMD1 ARFIP1 ARL15 BHLHE40 BRI3BP CDKN2AIP CHORDC1 CPEB4 DDX21 DHX9 DUSP4 EHD1 EIF5 FAM26F FUCA2 GADD45G GPAM HSPA2 HSPD1 HSPH1 INSIG1 IRF1 KDM6A LRRC56 LYST MAFF MCTP2 MPEG1 ODC1 PARD6B PDCD4 PHF20L1 RASGEF1B RELL1 RPS6KA3 SEC62 SLC4A7 SLC6A6 SI1 SNORD1C SNX10 TAF4B TBL1XR1 TIPARP	ACSL4 ADAM9 ARFIP1 ARHGAP26 ARID4B ARL15 BHLHE40 BRI3BP BTBD19 CD9 CDKN2AIP CHORDC1 CYFIP1 DHX9 DLG4 DOK3 DTX4 DUSP6 EFCAB11 EHD1 EIF5 GADD45G HSPD1 INPP4A IRF1 KDM6A LRRC56 LYST MAFF MAP2K6 MAP3K5 MCTP2 MXD1 NRIP1 ODC1 PKIG RASGEF1B REL RELL1 RIN3 RLF RPS6KA3 SEC62 SESN3 SLC4A7 SLC4A8 SLC6A6 SNX10 SRGAP2 STK17B TIPARP UBASH3B
p53_up_Xray	1	1
p53_targets	0.873355	1	BAX CASP6 GADD45A HSPA8 ODC1 PLK3 TAP1	BAX CASP6 HSPA8 ODC1 PLK3 TAP1
Promoter_loss.ATAC.reads_CREBBP.KD	0.866272	1	FAM129C
Intron_loss.ATAC.reads_CREBBP.KD	0.202782	0.00174452	AP1B1 BCL2 BICD2 CDK6 CSF2RB DTX1 FAM129C FARS2 HS1BP3 JAK1 LHPP MCTP2 OTUD5 PGM1 PKIB RNFT2 RNGTT SUMF1 SUSD3 TRIM14 VAV2	ACSF3 AP1B1 BCL2 CCDC9 CDK6 CMIP CSF2RB DTX1 HIPK2 HS1BP3 ITPR2 JAK1 KLF16 MCTP2 MYOF OTUD5 PAX5 PGM1 PKIB RAPGEF1 RNGTT SEMA4D SMAD3 SNX30 ST3GAL2 SUMF1 SUSD3 VAV2 XYLT1
Distal_loss.ATAC.reads_CREBBP.KD	1	0.712654	CRNKL1 CSF2RB DJC15 DOCK10 ERAP1 FCRL5 GADD45G GRHPR HNRNPD ID2 ITPKA MAOA MAPRE1 MPEG1 MTIF3 PTBP2 PUS1 RASGEF1B RPP40 SNRNP48 TRIM14 UBE2G1 UBE2N VOPP1 ZC3H15 ZDHHC16	ACSF3 AKAP12 AKAP2 ARID1B CHSY1 COQ2 CRNKL1 CSF2RB DJC15 DNMT3A DOCK10 GADD45G G12 GRHPR HNRNPD MAP2K6 MAPRE1 MTIF3 NEDD9 NRP2 PDE4D POU2F1 PTBP2 PUS1 RAPGEF1 RASGEF1B RPP40 SELPLG SNRNP48 SP4 TANK UBE2G1 UBE2N VOPP1 ZC3H15
Enhancer_loss.ATAC.reads_CREBBP.KD	0.953888	0.0622384	AP1B1 BCL2 BICD2 CDK6 CRNKL1 CSF2RB DJC15 DOCK10 DTX1 ERAP1 FAM129C FARS2 FCRL5 GADD45G GRHPR HNRNPD HS1BP3 ID2 ITPKA JAK1 LHPP MAOA MAPRE1 MCTP2 MPEG1 MTIF3 OTUD5 PGM1 PKIB PTBP2 PUS1 RASGEF1B RNFT2 RNGTT RPP40 SNRNP48 SUMF1 SUSD3 TRIM14 UBE2G1 UBE2N VAV2 VOPP1 ZC3H15 ZDHHC16	ACSF3 AKAP12 AKAP2 AP1B1 ARID1B BCL2 CCDC9 CDK6 CHSY1 CMIP COQ2 CRNKL1 CSF2RB DJC15 DNMT3A DOCK10 DTX1 GADD45G G12 GRHPR HIPK2 HNRNPD HS1BP3 ITPR2 JAK1 KLF16 MAP2K6 MAPRE1 MCTP2 MTIF3 MYOF NEDD9 NRP2 OTUD5 PAX5 PDE4D PGM1 PKIB POU2F1 PTBP2 PUS1 RAPGEF1 RASGEF1B RNGTT RPP40 SELPLG SEMA4D SMAD3 SNRNP48 SNX30 SP4 ST3GAL2 SUMF1 SUSD3 TANK UBE2G1 UBE2N VAV2 VOPP1 XYLT1 ZC3H15
Promoter_gain.ATAC.reads_CREBBP.KD	0.0827778	0.408807	LRRCC1 MRPS9 NFKBIE NSUN2 PLSCR1 TEX10 THUMPD2	LRRCC1 MRPS9 PLSCR1 TEX10 THUMPD2
Intron_gain.ATAC.reads_CREBBP.KD	1	0.712654	SEC22B ST8SIA6 TRPS1	ARHGAP21 ERP44 PHLPP1 SEC22B ST8SIA6 TRPS1
Distal_gain.ATAC.reads_CREBBP.KD	0.130246	0.137649	CWC15 MANBA TRPS1	MANBA NEBL SESN3 TRPS1
Enhancer_gain.ATAC.reads_CREBBP.KD	0.0827778	0.355221	CWC15 MANBA SEC22B ST8SIA6 TRPS1	ARHGAP21 ERP44 MANBA NEBL PHLPP1 SEC22B SESN3 ST8SIA6 TRPS1
MD901.loss.25.prom.g	2.61439e-16	6.08565e-15	ABHD10 ACADVL ACIN1 ACSL4 ACTB ACTR6 ADNP AGPAT1 AGTPBP1 AHCYL1 AMD1 ANKRD13A ANXA5 AP1B1 ARAP2 ARGLU1 ARL13B ARL8A ATAD5 ATF2 ATP6V0B BAX BOP1 BZW1 CAD CALR CASP8AP2 CCDC22 CCDC58 CCDC86 CCDC93 CCND3 CDKN2AIP CEP68 CHPF2 CISD1 COG8 COX8A CRIPT CS CSNK1D CSNK1E CTDP1 DAZAP1 DBF4 DDA1 DDX10 DHX15 DLG1 DNAJC15 DNAJC3 DOLK DRAP1 DYNLL1 E2F1 EIF2C3 EIF5 ELK1 ERAP1 FAM162A FAM60A FAM82A2 FBL FTSJD1 FU…	ACADVL ACIN1 ACSF3 ACSL4 ACTR6 ADNP AGPAT1 AGTPBP1 AHCYL1 AKAP2 ANKRD13A ANXA5 AP1B1 ARAP2 ARGLU1 ARID1B ARL13B ARL8A ARPC1B ASXL2 ATF2 ATG16L2 ATP6V0B BAX BOP1 BTBD19 BZW1 CALR CAMK2D CAPRIN1 CASP8AP2 CCDC109A CCDC22 CCDC93 CCND3 CCNL1 CD2BP2 CDKN2AIP CDT1 CEPT1 CISD1 COX8A CPSF6 CREBL2 CS CSNK1D CSNK1E CTDP1 DAZAP1 DCUN1D1 DDA1 DENND1A DHX15 DLG1 DLG4 DNAJB5 DNAJC15 DNAJC3 DOK3 DRAP1 DTX4 DYNLL…
MD901.loss.25.enhancer.g	5.02308e-08	6.26481e-20	AACS ABCC1 ABHD10 ACADVL ACIN1 ACSF2 ADAM10 ADAMTS13 ADNP AGTPBP1 AHCYL1 AHDC1 AP1B1 ARAP2 ARL8A ARL8B ATP6V1C1 ATXN7L3 BAX BHLHE40 BOP1 CAD CASP8AP2 CCDC22 CCDC93 CCND3 CDH23 CDK6 CDKN2AIP COG8 COX8A CRNKL1 CS CSNK1D CSNK1E DAZAP1 DDA1 DHX15 DNAJC15 DNAJC3 DOCK10 DTX1 DYNC1H1 E2F1 EARS2 EIF2C3 ELK1 ERAP1 ESR1 ETV6 FAM129C FAM60A FARS2 FBL FRMD8 GADD45G GGA3 GLT25D1 GOLPH3 GPAM GRPEL1 HAT1 HAUS5 …	AACS ABCC1 ACADVL ACIN1 ACSF2 ACSF3 ADAM10 ADAMTS13 ADNP AGTPBP1 AHCYL1 AHDC1 AKAP12 AKAP2 AP1B1 APP ARAP2 ARHGAP26 ARID1B ARL8A ARPC1B ASXL2 ATG16L2 ATP6V1C1 ATXN7L3 BAX BCL9L BHLHE40 BOP1 BTBD19 CAMK2D CAPRIN1 CAPZB CASP8AP2 CCDC109A CCDC22 CCDC93 CCND3 CD2AP CD2BP2 CD80 CD9 CDK6 CDKN2AIP CDT1 CEPT1 CHD2 CHD7 CHSY1 CMIP COBLL1 COMMD1 COX8A CPSF6 CRNKL1 CRTC3 CS CSNK1D CSNK1E DAZAP1 DCUN1D1 DDA1…
MD901.loss.5.prom.g	4.43943e-06	5.1324e-06	ACADVL ACTR6 AHCYL1 ANXA5 ARAP2 ARGLU1 ATAD5 CALR CCDC93 CDKN2AIP CEP68 CHPF2 COX8A CRIPT CSNK1D DAZAP1 DBF4 DDX10 DLG1 DOLK DYNLL1 EIF5 FAM82A2 GLT25D1 GOLPH3 GRPEL1 HNRNPAB HNRNPM LANCL1 LEMD3 LRRC56 MBTD1 METAP1 MRPL23 MTIF3 NAA10 NAGA NCAPG2 NCKIPSD NPM1 NRBF2 NUP188 ODC1 PGM1 PIGF PIGP PLEKHJ1 POLD1 PRDM15 PUS1 RAD23B RAD9B RALY RANBP1 RANBP3 RANGAP1 RBBP7 RCL1 REEP3 RNF138 RRP7A SAC3D1 SF3A…	ACADVL ACSF3 ACTR6 AHCYL1 AKAP2 ANXA5 ARAP2 ARGLU1 ARID1B ARPC1B BTBD19 CALR CAPRIN1 CCDC93 CDKN2AIP CDT1 COX8A CSNK1D DAZAP1 DLG1 DLG4 DTX4 DYNLL1 E2F3 EIF5 FAM49B GLT25D1 HNRNPAB HNRNPF KLF16 KTN1 LRRC56 MAN2A1 MAP3K5 MBTD1 MDM1 MRPL23 MTIF3 N4BP2 NAGA NCKIPSD NIN NPM1 NRBF2 NUP188 ODC1 OSBPL8 PGM1 PIGF PLEKHJ1 POC1B POLD1 POLE POU2F1 PPFIBP2 PRKCD PUS1 RAD23B RALY RANBP1 RANBP3 RANGAP1 RCL1 RE…
MD901.loss.5.enhancer.g	0.0125757	2.42643e-12	ABCC1 ACADVL ACSF2 AHCYL1 ARAP2 ATP6V1C1 BAX BOP1 CCDC93 CCND3 CDH23 CDKN2AIP COX8A CSNK1D DAZAP1 DNAJC15 DYNC1H1 EARS2 ESR1 FRMD8 GADD45G GLT25D1 GRPEL1 HNRNPM KCTD5 LANCL1 LARP1 MED29 METAP1 MGAT5 MRPL14 MRPL23 MTERF MTIF3 NCAPG2 NCKIPSD NCOA1 NCOR2 NFATC1 NPM1 NRBF2 NUP188 PDCL3 PIGF POLD1 PQLC2 PSMD7 PUS1 RAD23B RAD9B RALY RANBP1 RANGAP1 REEP3 RELL1 RNGTT RRP7A SLC25A40 SMARCD2 SNAI3 SOAT1 SP…	ABCC1 ACADVL ACSF2 ACSF3 AHCYL1 AKAP12 ARAP2 ARPC1B ATP6V1C1 BAX BCL9L BOP1 BTBD19 CAPRIN1 CCDC93 CCND3 CD80 CDKN2AIP CDT1 COBLL1 COX8A CRTC3 CSNK1D DAZAP1 DNAJC15 DYNC1H1 EARS2 ELF2 ESR1 FNBP1 FRMD8 GADD45G GLT25D1 GNA12 GPR133 HIPK2 HNRNPF IKZF1 INPP4A INPP5A ITPK1 ITPR2 KCNJ6 KCTD5 KCTD7 KDM2B KTN1 LANCL2 LATS2 MAN2A1 MDM1 MGAT5 MRPL14 MRPL23 MSN MTERF MTIF3 MYOF NCKIPSD NCOA1 NCOA2 NEDD9 NFAM…
crebbp.ly7.enhancer	0.000138902	6.85014e-21	AACS ABCC1 ABT1 ACSF2 ACTB ACTR2 ADAM10 ADNP ADPGK AGPAT5 AGPAT6 AHCYL1 AHDC1 ANKRD13A AP1B1 AP2S1 ARAF ARAP2 ARFGEF2 ARFIP1 ARL15 ARL5A ARL8B ARMC6 ARSA ATP1B3 ATP5A1 ATP6V1C1 ATXN1L BAZ1B BCL2 BCL9 BEND3 BHLHE40 BICD2 BPNT1 BRI3BP BTBD9 CAD CCDC146 CCDC75 CCND3 CDC42SE2 CDH23 CDK6 CDKN2AIP CEP68 CEP78 CHIC2 CIC CLEC16A CNPY4 CORO7 COX4I1 CPEB4 CREBBP CS CSF2RB CSNK1E CSRP1 CSTB CTNNBL1 DBP DDX1…	AACS ABCC1 ACSF2 ACSF3 ACTR2 ADAM10 ADNP ADPGK AGPAT6 AHCYL1 AHDC1 ANK3 ANKRD13A ANO6 AP1B1 AP1S3 AP2S1 APP ARAP2 ARFGEF2 ARFIP1 ARHGAP21 ARHGAP26 ARID1B ARID5B ARL15 ATG16L2 ATP1B3 ATP5A1 ATP6V1C1 ATP6V1G3 ATXN1L BAZ1B BCL2 BCL9 BCL9L BHLHE40 BMP2K BPNT1 BRI3BP BTBD9 CABIN1 CAPRIN1 CASC5 CASK CCDC162 CCND3 CD2AP CD2BP2 CD9 CDC42 CDC42SE2 CDK6 CDKN2AIP CDT1 CHD7 CHIC2 CIC CIITA CMAH CMIP COBLL1 C…
crebbp.ly7.prom	4.93257e-08	2.10522e-12	ABCC1 ABHD13 ABT1 ACTB ACTR2 ACTR6 ADAM10 ADNP AGPAT1 AGPAT5 AMD1 ANKRD13A AP2S1 APBA3 ARMC6 ATAD3A ATP5A1 BCL9 BPNT1 BRI3BP CAD CALR CASP8AP2 CCDC146 CCNI CCT8 CD164 CDC42SE2 CENPP CISD1 CNOT1 CNPY4 COG8 COMMD7 COPS2 COX6A1 COX8A CPEB4 CS CSF2RB CSNK1E CSRP1 DAZAP1 DBP DDA1 DDX10 DDX21 DLG1 DNASE1L3 DTX1 E2F1 EHD1 ELL EPT1 ETV6 EXOSC1 FAM129C FAM185A FASTKD1 FASTKD2 FCRL5 FKBPL G3BP1 GALK2 GLRX5…	ABCC1 ACSF3 ACTR2 ACTR6 ADAM10 ADNP AGPAT1 ANKRD13A AP1S3 AP2S1 APBA3 ARID1B ARID5B ATF6 ATG16L2 ATP5A1 BCL9 BMP2K BPNT1 BRI3BP C15ORF62 CALR CASC5 CASP8AP2 CCNI CCT8 CD164 CD2BP2 CDC42SE2 CDT1 CENPP CEPT1 CIITA CISD1 CNOT1 COPB1 COPS2 COX6A1 COX8A CS CSF2RB CSNK1E DAP DAZAP1 DBP DDA1 DENND1B DEPDC5 DLG1 DNASE1L3 EBF1 ECE1 EHD1 ELF2 ELL ERGIC1 ETV6 EXOSC1 FAM129C FAR1 FASTKD2 FBXO33 FBXO40 FGFR1O…
ENHANCER ACTIVITY LOSS GENES IN GCB		0.00193339		ARID1B ATP6V1G3 BCL2 BMP2K CHD7 CHSY1 DNMT3A DOCK10 DUSP6 DYRK4 FGR FMNL3 FOXK1 KDM6A LAMC1 LCP1 LYST LZTFL1 MAP3K5 MGAT5 PFKP PTPRC RIN3 SCAMP4 SELPLG SIPA1L1 SMAD3 SNX29 SP4 SUCO TG UBAC2 WDFY2 XYLT1 ZBTB20
CALCINEURIN_NF_AT_SIGNALING	0.0398554	0.0188091	ACTB BCL2 CREBBP MAPK9 NFATC1 NFATC2 NFKBIB NFKBIE NUP214 PIN1 SP1 VAV2	BCL2 CABIN1 CREBBP GSK3B IL4 MAPK9 NFATC1 NFATC2 NUP214 P2RX7 PIN1 PTPRC SP1 TRAF2 VAV2
SIG_BCR_SIGNALING_ PATHWAY		0.000744648	BCL2 ITPR1 NFATC1 NFATC2	BCL2 CR2 GSK3B ITPR1 ITPR2 MAP4K1 NFATC1 NFATC2 PIK3CA PLCG2 PPP1R13B PTPRC
BAD PATHWAY	0.0397227		BAX BCL2 CSF2RB IL3RA PRKACB PRKAR1A	BAX BCL2 CSF2RB IL3RA PIK3CA PRKAR1A
CELLCYCLE PATHWAY	0.0397227		CCND2 CCND3 CCNH CDK4 CDK6 E2F1	CCND2 CCND3 CDK6
GATA3 PATHWAY	0.0397227		MAF NFATC1 NFATC2 PRKACB PRKAR1A	IL4 NFATC1 NFATC2 PRKAR1A
GPCR PATHWAY	0.0397227		ELK1 GNB1 NFATC1 NFATC2 PRKACB PRKAR1A RPS6KA3	GNB1 MAP2K1 NFATC1 NFATC2 PRKAR1A RPS6KA3
P53 PATHWAY	0.0397227		BAX BCL2 CDK4 E2F1 GADD45A	BAX BCL2
UBIQUITIN_MEDIATED_PROTEOLYSIS	0.0397227		CDC34 UBE2G1 UBE2I UBE2L3 UBE2N UBE2S	CDC34 UBE2G1 UBE2I UBE2L3 UBE2N UBE2S
BIOPOLYMER_METABOLIC_PROCESS	2.51509e-16	7.53127e-12	ABT1 ADAM10 ADAMTS13 ADRM1 ALG1 APH1B ARAF ARNTL ART1 ATR BAX BUD31 CALR CCND2 CCND3 CCNH CDK2AP1 COPS2 CREBBP CRNKL1 CSNK1D CSNK1E CTDP1 CWC15 DBF4 DBP DHX15 DRAP1 DTX1 DUSP4 DYRK1B E2F1 ELK1 ELL ERF FARS2 FBL FOXH1 GADD45A GADD45G GALNT6 GTF2H4 HAT1 HELLS HIF1A HSF2 HSPA1B IL12A INTS2 IRF1 IRF8 JAK3 KHDRBS1 KLF11 KLF9 LIG4 MAF MAFF MAP4K2 MARK2 MED27 METAP1 MKNK1 MTERF MTMR3 MYO6 MYST3 GPA NDUF…	ADAM10 ADAMTS13 ADRM1 ALG1 ARID5B ATF6 ATR BAX CALR CCND2 CCND3 CD80 CDT1 CHD2 CHD4 COPS2 CPSF6 CREBBP CRNKL1 CSNK1D CSNK1E CTDP1 DBP DHX15 DNMT3A DRAP1 DTX1 DUSP6 E2F3 ELF2 ELL ERF FBL FGR FOXN1 GAD1 GADD45G GALNT6 GATAD2A GSK3B HIF1A IL12A IL4 IRAK3 IRF1 IRF8 JMJD1C KHDRBS1 LATS2 LMO4 LMTK2 MAFF MAP2K6 MAP4K1 MAP4K2 MARK2 MED27 MSRA MTERF MTMR3 MYST3 GPA NDUFS4 NFATC1 NFATC2 NFKB1 NOL8 NOLC1 NR…
NUCLEOBASE__NUCLEOSIDE__NUCLEOTIDE_AND_NUCLEIC_ACID_METABOLIC_PROCESS	1.59962e-11	2.06152e-07	ABT1 ADRM1 ARNTL ATR BAX BPNT1 BUD31 CALR CCNH CDK2AP1 COMMD7 COPS2 CREBBP CRNKL1 CSNK1D CSNK1E CWC15 DBF4 DBP DHX15 DRAP1 DTX1 DYRK1B E2F1 ELK1 ELL ERF FARS2 FBL FOXH1 GADD45A GADD45G GTF2H4 HELLS HIF1A HSF2 HSPA1B ID2 INTS2 IRF1 IRF8 KHDRBS1 KLF11 KLF9 LIG4 MAF MAFF MED27 MTERF MYO6 MYST3 NFATC1 NFATC2 NFKBIB NFRKB NOL8 NOLC1 NPM1 NR1D2 NR6A1 NSUN2 PA2G4 PARP3 PDCD4 PIAS4 POLD1 POLR1C POLR2D PO…	ADRM1 ARID5B ATF6 ATR BAX BPNT1 CALR CDT1 CHD2 CHD4 COPS2 CPSF6 CREBBP CREBL2 CRNKL1 CSNK1D CSNK1E DBP DHX15 DNMT3A DRAP1 DTX1 E2F3 ELF2 ELL ERF FBL FOXN1 GADD45G GATAD2A HIF1A IL4 IRF1 IRF8 JMJD1C KHDRBS1 LANCL2 LMO4 MAFF MED27 MTERF MYST3 NFAM1 NFATC1 NFATC2 NFKB1 NOD2 NOL8 NOLC1 NPM1 NRIP1 NSD1 OGG1 PA2G4 PARP3 PAX5 PIAS4 POLD1 POLE POLR1C POLR2D POU2F1 PPAN PPP5C PRKAR1A PTGES3 PWP1 RAD23B RB…
RNA_METABOLIC_PROCESS	4.30611e-08	0.000161098	ABT1 ADRM1 ARNTL BUD31 CALR CCNH COPS2 CREBBP CRNKL1 CWC15 DBP DHX15 DRAP1 DTX1 DYRK1B E2F1 ELK1 ELL ERF FARS2 FBL FOXH1 GTF2H4 HELLS HIF1A HSF2 HSPA1B INTS2 IRF1 IRF8 KHDRBS1 KLF11 KLF9 MAF MAFF MED27 MTERF MYO6 NFATC1 NFATC2 NFRKB NOLC1 NR1D2 NR6A1 NSUN2 PA2G4 POLR1C POLR2D POLR2K POP4 PPAN PRKAR1A RSEH2A RNGTT RNMT RRP9 RUVBL1 SAP18 SF1 SF3A2 SMARCD2 SPC2 SNRPB2 SNRPC SP1 SYNCRIP TCEB2 TFAP4 T…	ADRM1 ARID5B ATF6 CALR CHD2 CHD4 COPS2 CPSF6 CREBBP CRNKL1 DBP DHX15 DRAP1 DTX1 E2F3 ELF2 ELL ERF FBL FOXN1 GATAD2A HIF1A IL4 IRF1 IRF8 JMJD1C KHDRBS1 LMO4 MAFF MED27 MTERF NFATC1 NFATC2 NFKB1 NOLC1 NRIP1 NSD1 PA2G4 PAX5 POLR1C POLR2D PPAN PRKAR1A RBMS1 REST RSEH2A RNGTT RNMT RUNX3 RUVBL1 SAP18 SF1 SF3B4 SMAD3 SMARCD2 SMARCD3 SPC2 SNRPB2 SNRPC SP1 SP4 SYNCRIP TCEB2 TFAP4 TRIM24 TRPS1 U2AF1 YBX1 Z…
CELLULAR_PROTEIN_METABOLIC_PROCESS	2.19631e-07	4.78666e-07	ABCF1 ADAM10 ADAMTS13 ADRM1 ALG1 APH1B ARAF ART1 ASMT CASP6 CCND2 CCND3 CDK2AP1 CDKN2AIP CREBBP CSNK1D CSNK1E CTDP1 DPH1 DUSP4 DYRK1B EIF2B5 EIF5 ERAP1 FARS2 FBXL6 GALNT6 HAT1 HBS1L HPS4 HSP90AA1 HSPE1 IL12A JAK3 MAP4K2 MAPRE1 MARK2 METAP1 MKNK1 MRPL23 MRPS7 MTERF MTIF3 MTMR3 MYST3 CA GPA NDUFS4 PARP3 PIGF PIM2 PITRM1 PLK3 PLOD3 PPM1B PRKACB PRKX PRMT2 RCE1 RPL13 RPL14 RPL18A RPL3 RPS10 RPS12 RPS…	ABCF1 ADAM10 ADAMTS13 ADRM1 ALG1 ASMT ATF6 CASP6 CCND2 CCND3 CD80 CDKN2AIP CREBBP CSNK1D CSNK1E CTDP1 DPH1 DUSP6 EIF2B5 EIF5 ETF1 FGR GAD1 GALNT6 GSK3B HBS1L HPS4 HSPE1 IL12A IL4 IRAK3 LATS2 LMTK2 MAP2K6 MAP4K1 MAP4K2 MAPRE1 MARK2 MRPL23 MSRA MTERF MTIF3 MTMR3 MYST3 CA GPA NDUFS4 NOD1 NSD1 PARP3 PGGT1B PIGF PIM2 PITRM1 PLAU PLK3 PPM1B PPP5C PREP PRKCD PRKG1 PRKX PTPN14 PTPRC RPL11 RPL13 RPL18A RP…
CELLULAR_MACROMOLECULE_METABOLIC_PROCESS	3.49931e-07	7.57784e-07	ABCF1 ADAM10 ADAMTS13 ADRM1 ALG1 APH1B ARAF ART1 ASMT CASP6 CCND2 CCND3 CDK2AP1 CDKN2AIP CREBBP CSNK1D CSNK1E CTDP1 DPH1 DUSP4 DYRK1B EIF2B5 EIF5 ERAP1 FARS2 FBXL6 GALNT6 HAT1 HBS1L HPS4 HSP90AA1 HSPE1 IL12A JAK3 MAP4K2 MAPRE1 MARK2 METAP1 MKNK1 MRPL23 MRPS7 MTERF MTIF3 MTMR3 MYST3 CA GPA NDUFS4 PARP3 PIGF PIM2 PITRM1 PLK3 PLOD3 PPM1B PRKACB PRKX PRMT2 RCE1 RPL13 RPL14 RPL18A RPL3 RPS10 RPS12 RPS…	ABCF1 ADAM10 ADAMTS13 ADRM1 ALG1 ASMT ATF6 CASP6 CCND2 CCND3 CD80 CDKN2AIP CREBBP CSNK1D CSNK1E CTDP1 DPH1 DUSP6 EIF2B5 EIF5 ETF1 FGR GAD1 GALNT6 GSK3B HBS1L HPS4 HSPE1 IL12A IL4 IRAK3 LATS2 LMTK2 MAP2K6 MAP4K1 MAP4K2 MAPRE1 MARK2 MRPL23 MSRA MTERF MTIF3 MTMR3 MYST3 CA GPA NDUFS4 NOD1 NSD1 PARP3 PGGT1B PIGF PIM2 PITRM1 PLAU PLK3 PPM1B PPP5C PREP PRKCD PRKG1 PRKX PTPN14 PTPRC RPL11 RPL13 RPL18A RP…
PROTEIN_METABOLIC_PROCESS	3.94949e-07	3.45534e-08	ABCF1 ADAM10 ADAMTS13 ADRM1 ALG1 APH1B ARAF ART1 ASMT BAX CASP6 CCND2 CCND3 CDK2AP1 CDKN2AIP CREBBP CSNK1D CSNK1E CTDP1 DPH1 DUSP4 DYRK1B EIF2B5 EIF5 ERAP1 FARS2 FBXL6 GALNT6 HAT1 HBS1L HPS4 HSP90AA1 HSPE1 IL12A JAK3 LLGL1 MAP4K2 MAPRE1 MARK2 METAP1 MKNK1 MRPL23 MRPS7 MTERF MTIF3 MTMR3 MYST3 CA GPA NDUFS4 PARD6B PARP3 PIGF PIM2 PITRM1 PLK3 PLOD3 PPM1B PRKACB PRKX PRMT2 RCE1 RPL13 RPL14 RPL18A RPL…	ABCF1 ADAM10 ADAMTS13 ADRM1 ALG1 ASMT ATF6 BAX CAPZA1 CASP6 CCND2 CCND3 CD2AP CD80 CD9 CDC42 CDKN2AIP CREBBP CSNK1D CSNK1E CTDP1 DLG4 DPH1 DUSP6 EIF2B5 EIF5 ETF1 FGR GAD1 GALNT6 GSK3B HBS1L HPS4 HSPE1 IL12A IL4 IRAK3 LAMC1 LATS2 LMTK2 MAP2K6 MAP4K1 MAP4K2 MAPRE1 MARK2 MRPL23 MSRA MTERF MTIF3 MTMR3 MYST3 CA GPA NDUFS4 NOD1 NOD2 NSD1 PARP3 PGGT1B PIGF PIM2 PITRM1 PLAU PLK3 PPM1B PPP5C PREP PRKCD PR…
TRANSCRIPTION	4.30179e-06	2.29479e-05	ABT1 ADRM1 ARNTL BUD31 CALR CCNH COMMD7 COPS2 CREBBP DBP DRAP1 DTX1 DYRK1B E2F1 ELK1 ELL ERF FOXH1 GTF2H4 HELLS HIF1A HSF2 ID2 IRF1 IRF8 KHDRBS1 KLF11 KLF9 MAF MAFF MED27 MTERF MYO6 MYST3 NFATC1 NFATC2 NFKBIB NFRKB NPM1 NR1D2 NR6A1 PA2G4 PDCD4 PIAS4 POLR1C POLR2D POLR2K PRKAR1A PWP1 RUVBL1 SAP18 SIRT2 SMARCD2 SPC2 SP1 TCEB2 TFAP4 TFB2M TRPS1 UBE2N XAB2 YBX1 ZHX1	ADRM1 ARID5B ATF6 CALR CHD2 CHD4 COPS2 CREBBP CREBL2 DBP DRAP1 DTX1 E2F3 ELF2 ELL ERF FOXN1 GATAD2A HIF1A IL4 IRF1 IRF8 JMJD1C KHDRBS1 LANCL2 LMO4 MAFF MED27 MTERF MYST3 NFAM1 NFATC1 NFATC2 NFKB1 NOD2 NPM1 NRIP1 NSD1 PA2G4 PAX5 PIAS4 POLR1C POLR2D POU2F1 PPP5C PRKAR1A PWP1 REST RUNX3 RUVBL1 SAP18 SIRT2 SMAD3 SMARCD2 SMARCD3 SPC2 SP1 SP4 TCEB2 TFAP4 TRIM24 TRPS1 UBE2N XAB2 YBX1 ZHX1 ZHX2
RNA_BIOSYNTHETIC_PROCESS	0.000329072	0.0018953	ABT1 ADRM1 ARNTL BUD31 CALR CCNH COPS2 CREBBP DBP DRAP1 DTX1 DYRK1B E2F1 ELK1 ELL ERF FOXH1 GTF2H4 HELLS HIF1A HSF2 IRF1 IRF8 KLF11 KLF9 MAF MAFF MED27 MTERF MYO6 NFATC1 NFATC2 NFRKB NR1D2 NR6A1 PA2G4 POLR1C POLR2D POLR2K PRKAR1A RUVBL1 SAP18 SMARCD2 SPC2 SP1 TCEB2 TFAP4 TFB2M TRPS1 YBX1 ZHX1	ADRM1 ARID5B ATF6 CALR CHD2 CHD4 COPS2 CREBBP DBP DRAP1 DTX1 E2F3 ELF2 ELL ERF FOXN1 GATAD2A HIF1A IL4 IRF1 IRF8 JMJD1C LMO4 MAFF MED27 MTERF NFATC1 NFATC2 NFKB1 NRIP1 NSD1 PA2G4 PAX5 POLR1C POLR2D PRKAR1A REST RUNX3 RUVBL1 SAP18 SMAD3 SMARCD2 SMARCD3 SPC2 SP1 SP4 TCEB2 TFAP4 TRIM24 TRPS1 YBX1 ZHX1 ZHX2
TRANSCRIPTION__DNA_DEPENDENT	0.000329072	0.0018953	ABT1 ADRM1 ARNTL BUD31 CALR CCNH COPS2 CREBBP DBP DRAP1 DTX1 DYRK1B E2F1 ELK1 ELL ERF FOXH1 GTF2H4 HELLS HIF1A HSF2 IRF1 IRF8 KLF11 KLF9 MAF MAFF MED27 MTERF MYO6 NFATC1 NFATC2 NFRKB NR1D2 NR6A1 PA2G4 POLR1C POLR2D POLR2K PRKAR1A RUVBL1 SAP18 SMARCD2 SPC2 SP1 TCEB2 TFAP4 TFB2M TRPS1 YBX1 ZHX1	ADRM1 ARID5B ATF6 CALR CHD2 CHD4 COPS2 CREBBP DBP DRAP1 DTX1 E2F3 ELF2 ELL ERF FOXN1 GATAD2A HIF1A IL4 IRF1 IRF8 JMJD1C LMO4 MAFF MED27 MTERF NFATC1 NFATC2 NFKB1 NRIP1 NSD1 PA2G4 PAX5 POLR1C POLR2D PRKAR1A REST RUNX3 RUVBL1 SAP18 SMAD3 SMARCD2 SMARCD3 SPC2 SP1 SP4 TCEB2 TFAP4 TRIM24 TRPS1 YBX1 ZHX1 ZHX2
TRANSCRIPTION_FROM_RNA_POLYMERASE_II_PROMOTER	0.00043085	0.00279924	ABT1 ADRM1 ARNTL BUD31 CCNH COPS2 DBP DRAP1 DTX1 E2F1 ELK1 ELL ERF FOXH1 GTF2H4 HIF1A HSF2 IRF1 IRF8 KLF11 KLF9 MAF MAFF MED27 MYO6 NFATC1 NFRKB NR6A1 POLR2D POLR2K PRKAR1A RUVBL1 SAP18 SMARCD2 SPC2 SP1 TCEB2 TFAP4 TRPS1 YBX1	ADRM1 ATF6 CHD2 CHD4 COPS2 DBP DRAP1 DTX1 E2F3 ELF2 ELL ERF FOXN1 HIF1A IL4 IRF1 IRF8 LMO4 MAFF MED27 NFATC1 NFKB1 NRIP1 NSD1 PAX5 POLR2D PRKAR1A RUNX3 RUVBL1 SAP18 SMAD3 SMARCD2 SMARCD3 SPC2 SP1 SP4 TCEB2 TFAP4 TRIM24 TRPS1 YBX1
BIOPOLYMER_MODIFICATION	0.000523598	0.000161098	ADAM10 ADAMTS13 ALG1 APH1B ARAF ART1 CCND2 CCND3 CDK2AP1 CREBBP CSNK1D CSNK1E CTDP1 DUSP4 DYRK1B GALNT6 HAT1 HELLS IL12A JAK3 MAP4K2 MARK2 METAP1 MKNK1 MTMR3 MYST3 GPA NDUFS4 NSUN2 PARP3 PIGF PIM2 PLK3 PLOD3 PPM1B PRKACB PRKX PRMT2 SAE1 SET SIRT2 STK16 STUB1 TRAF6 TUSC3 TWF1 UBA3 UBA52 UBE2N UHMK1 USP33	ADAM10 ADAMTS13 ALG1 CCND2 CCND3 CD80 CREBBP CSNK1D CSNK1E CTDP1 DNMT3A DUSP6 FGR GAD1 GALNT6 GATAD2A GSK3B IL12A IRAK3 LATS2 LMTK2 MAP2K6 MAP4K1 MAP4K2 MARK2 MSRA MTMR3 MYST3 GPA NDUFS4 NSD1 PARP3 PGGT1B PIGF PIM2 PLK3 PPM1B PPP5C PRKCD PRKG1 PRKX PTPN14 PTPRC SET SIRT2 SOCS1 STK17B STUB1 TPST2 TRAF6 TUSC3 TWF1 UBA3 UBA52 UBE2N UHMK1 USP33 WWP2
RNA_PROCESSING	0.000700311		CRNKL1 CWC15 DHX15 FARS2 FBL INTS2 KHDRBS1 NOLC1 NSUN2 POP4 PPAN RNGTT RNMT RRP9 SF1 SF3A2 SNRPB2 SNRPC SYNCRIP TRNT1 U2AF1	CPSF6 CRNKL1 DHX15 FBL KHDRBS1 NOLC1 PPAN RBMS1 RNGTT RNMT SF1 SF3B4 SNRPB2 SNRPC SYNCRIP U2AF1
PROTEIN_MODIFICATION_PROCESS	0.000909185	0.000239178	ADAM10 ADAMTS13 ALG1 APH1B ARAF ART1 CCND2 CCND3 CDK2AP1 CREBBP CSNK1D CSNK1E CTDP1 DUSP4 DYRK1B GALNT6 HAT1 IL12A JAK3 MAP4K2 MARK2 METAP1 MKNK1 MTMR3 MYST3 GPA NDUFS4 PARP3 PIGF PIM2 PLK3 PLOD3 PPM1B PRKACB PRKX PRMT2 SAE1 SET SIRT2 STK16 STUB1 TRAF6 TUSC3 TWF1 UBA3 UBA52 UBE2N UHMK1 USP33	ADAM10 ADAMTS13 ALG1 CCND2 CCND3 CD80 CREBBP CSNK1D CSNK1E CTDP1 DUSP6 FGR GAD1 GALNT6 GSK3B IL12A IRAK3 LATS2 LMTK2 MAP2K6 MAP4K1 MAP4K2 MARK2 MSRA MTMR3 MYST3 GPA NDUFS4 NSD1 PARP3 PGGT1B PIGF PIM2 PLK3 PPM1B PPP5C PRKCD PRKG1 PRKX PTPN14 PTPRC SET SIRT2 SOCS1 STK17B STUB1 TPST2 TRAF6 TUSC3 TWF1 UBA3 UBA52 UBE2N UHMK1 USP33 WWP2
INTRACELLULAR_TRANSPORT	0.00103978	0.00151236	ARFIP1 BCL2 CALR HPS4 HSP90AA1 KHDRBS1 KIF3B LMAN2L LYST MON2 MYO6 GPA PA NCKIPSD NF1 NFKBIE NPM1 NUP214 NUPL2 PEX10 SCAMP3 SEC22B SEC63 TIMM17A TRAM1 TRNT1 TRPS1 UHMK1	ARFIP1 BCL2 CALR COPB1 DUSP16 ERGIC1 GSK3B HPS4 KHDRBS1 KIF3B KP4 LMAN2L LYST MYO1E GPA PA NCKIPSD NPM1 NUP214 NUPL2 PEX10 RAB2A RPL11 SCAMP3 SEC22B SEC63 SMAD3 SP23 TRPS1 UHMK1
REGULATION_OF_CELLULAR_METABOLIC_PROCESS	0.00103978	0.00383552	ARNTL ATR BUD31 CALR CCND2 CCND3 CCNH COMMD7 CREBBP DBP DRAP1 DYRK1B E2F1 EIF2B5 EIF5 ELK1 ERF FOXH1 HELLS HIF1A HSP90AA1 ID2 IL12A IRF8 KHDRBS1 KLF11 KLF9 MAPRE1 MED27 METAP1 MTIF3 MYO6 MYST3 NDUFS4 NFATC1 NFATC2 NPM1 NR1D2 NR6A1 PA2G4 PDCD4 PIAS4 POLR2K PRKAR1A RUVBL1 SAP18 SET SIRT2 SMARCAD1 SMARCD2 SP1 STUB1 TFAP4 TLR3 TPP1 UBE2N ZHX1	ARID5B ATF6 ATR CALR CCND2 CCND3 CD80 CDT1 CHD2 CHD4 CREBBP DBP DRAP1 EIF2B5 EIF5 ELF2 ERF ETF1 FOXN1 GATAD2A HIF1A IL12A IL4 IRF8 JMJD1C KHDRBS1 LANCL2 MAPRE1 MED27 MTIF3 MYST3 NDUFS4 NFAM1 NFATC1 NFATC2 NOD2 NPM1 NRIP1 NSD1 PA2G4 PIAS4 POU2F1 PRKAR1A REST RUVBL1 SAP18 SET SIRT2 SMAD3 SMARCD2 SMARCD3 SOCS1 SP1 SP4 STUB1 TFAP4 TLR3 TPP1 UBE2N ZHX1 ZHX2
PROTEIN_TRANSPORT	0.00136542	0.0140629	ARFIP1 CALR HPS4 LMAN2L MYO6 GPA NCKIPSD NF1 NFKBIE NPM1 NUP214 NUPL2 PEX10 SEC63 TIMM17A TRAM1 TRNT1 TRPS1 UHMK1	ARFIP1 CALR DUSP16 GSK3B HPS4 KP4 LMAN2L GPA NCKIPSD NPM1 NUP214 NUPL2 PEX10 RPL11 SEC63 SMAD3 TRPS1 UHMK1
INTRACELLULAR_PROTEIN_TRANSPORT	0.00142241	0.0142608	ARFIP1 CALR HPS4 MYO6 GPA NCKIPSD NF1 NFKBIE NPM1 NUP214 NUPL2 PEX10 SEC63 TIMM17A TRAM1 TRNT1 TRPS1 UHMK1	ARFIP1 CALR DUSP16 GSK3B HPS4 KP4 GPA NCKIPSD NPM1 NUP214 NUPL2 PEX10 RPL11 SEC63 SMAD3 TRPS1 UHMK1
REGULATION_OF_METABOLIC_PROCESS	0.00142241	0.00178934	ARNTL ATR BUD31 CALR CCND2 CCND3 CCNH COMMD7 CREBBP DBP DRAP1 DYRK1B E2F1 EIF2B5 EIF5 ELK1 ERF FOXH1 HELLS HIF1A HSP90AA1 ID2 IL12A IRF8 KHDRBS1 KLF11 KLF9 MAPRE1 MED27 METAP1 MTIF3 MYO6 MYST3 NDUFS4 NFATC1 NFATC2 NPM1 NR1D2 NR6A1 PA2G4 PDCD4 PIAS4 POLR2K PRKAR1A RUVBL1 SAP18 SET SIRT2 SMARCAD1 SMARCD2 SP1 STUB1 TFAP4 TLR3 TPP1 UBE2N ZHX1	ARID5B ATF6 ATR CALR CCND2 CCND3 CD80 CDC42 CDT1 CHD2 CHD4 CREBBP DBP DRAP1 EIF2B5 EIF5 ELF2 ERF ETF1 FOXN1 GATAD2A HIF1A IL12A IL4 IRAK3 IRF8 JMJD1C KHDRBS1 LANCL2 MAPRE1 MED27 MTIF3 MYST3 NDUFS4 NFAM1 NFATC1 NFATC2 NOD2 NPM1 NRIP1 NSD1 PA2G4 PIAS4 POU2F1 PRKAR1A REST RUVBL1 SAP18 SET SIRT2 SMAD3 SMARCD2 SMARCD3 SOCS1 SP1 SP4 STUB1 TFAP4 TLR3 TPP1 UBE2N ZHX1 ZHX2
ORGANELLE_ORGANIZATION_AND_BIOGENESIS	0.00160037	0.020751	ACIN1 AP2S1 ARFIP2 BAX BCL2 BNIP1 CREBBP DLG1 DYNLL1 FBL HELLS HPS4 HSP90AA1 KIF3B LASP1 LLGL1 MAPRE1 MSTO1 MTERF MYO6 MYST3 GPA NDUFS4 NF1 NOLC1 NPM1 PACSIN2 PEX10 POP4 PTGES3 RRP9 SAC3D1 SDAD1 SET SIRT2 TFB2M TIMM17A TRNT1 UBE2N	ACIN1 ANK3 AP2S1 ARFIP2 BAX BCL2 BNIP1 CDC42 CREBBP DLG1 DYNLL1 ELMO1 FBL HPS4 KIF3B LASP1 MAPRE1 MID1 MTERF MYO1E MYST3 GPA NDUFS4 NEBL NOLC1 NPM1 NSD1 PACSIN2 PEX10 PRKG1 PTGES3 SDAD1 SET SIRT2 SP23 SORBS1 SRGN UBE2N
PROTEIN_TARGETING	0.00186149	0.00782956	CALR HPS4 GPA NCKIPSD NF1 NFKBIE NUP214 NUPL2 PEX10 SEC63 TIMM17A TRAM1 TRNT1 TRPS1 UHMK1	CALR DUSP16 GSK3B HPS4 KP4 GPA NCKIPSD NUP214 NUPL2 PEX10 RPL11 SEC63 SMAD3 TRPS1 UHMK1
TRANSLATION	0.0021704	0.0342487	ABCF1 ASMT DPH1 EIF2B5 EIF5 FARS2 HBS1L METAP1 MRPL23 MRPS7 MTIF3 CA RPL13 RPL14 RPL18A RPL3 RPS10 RPS12 RPS5 TLR3	ABCF1 ASMT DPH1 EIF2B5 EIF5 ETF1 HBS1L IL4 MRPL23 MTIF3 CA RPL11 RPL13 RPL18A RPL3 RPS10 RPS5 TLR3
REGULATION_OF_GENE_EXPRESSION	0.00255535	0.00956435	ARNTL BAX BUD31 CALR CCNH CDK4 CDK6 COMMD7 CREBBP DBP DRAP1 DYRK1B E2F1 EIF2B5 EIF5 ELK1 ERF FOXH1 HELLS HIF1A ID2 IRF8 KHDRBS1 KLF11 KLF9 MED27 METAP1 MTIF3 MYO6 MYST3 NFATC1 NFATC2 NPM1 NR1D2 NR6A1 PA2G4 PDCD4 PIAS4 POLR2K PRKAR1A RUVBL1 SAP18 SIRT2 SMARCD2 SP1 TFAP4 TLR3 UBE2N ZHX1	ARID5B ATF6 BAX CALR CDK6 CHD2 CHD4 CREBBP DBP DNMT3A DRAP1 EIF2B5 EIF5 ELF2 ERF ETF1 FOXN1 GATAD2A HIF1A IL4 IRF8 JMJD1C KHDRBS1 LANCL2 MED27 MTIF3 MYST3 NFAM1 NFATC1 NFATC2 NOD2 NPM1 NRIP1 NSD1 PA2G4 PIAS4 POU2F1 PRKAR1A REST RUVBL1 SAP18 SIRT2 SMAD3 SMARCD2 SMARCD3 SP1 SP4 TFAP4 TLR3 UBE2N ZHX1 ZHX2
POST_TRANSLATIONAL_PROTEIN_MODIFICATION	0.00271205	0.000239178	ADAM10 ADAMTS13 APH1B ART1 CCND2 CCND3 CDK2AP1 CREBBP CSNK1D CSNK1E CTDP1 DUSP4 DYRK1B IL12A JAK3 MAP4K2 MARK2 MKNK1 MTMR3 MYST3 NDUFS4 PARP3 PIM2 PLK3 PPM1B PRKACB PRKX PRMT2 SAE1 SET SIRT2 STK16 STUB1 TRAF6 TWF1 UBE2N UHMK1 USP33	ADAM10 ADAMTS13 CCND2 CCND3 CD80 CREBBP CSNK1D CSNK1E CTDP1 DUSP6 FGR GAD1 GSK3B IL12A IRAK3 LATS2 LMTK2 MAP2K6 MAP4K1 MAP4K2 MARK2 MTMR3 MYST3 NDUFS4 NSD1 PARP3 PIM2 PLK3 PPM1B PPP5C PRKCD PRKG1 PRKX PTPN14 PTPRC SET SIRT2 SOCS1 STK17B STUB1 TPST2 TRAF6 TWF1 UBE2N UHMK1 USP33
RIBOSOME_BIOGENESIS_AND_ASSEMBLY	0.00380358		FBL NOLC1 NPM1 POP4 RRP9 SDAD1	FBL NOLC1 NPM1 SDAD1
DNA_METABOLIC_PROCESS	0.00553385	0.0237778	ATR BAX CDK2AP1 CSNK1D CSNK1E DBF4 GADD45A GADD45G GTF2H4 HELLS LIG4 NOL8 PARP3 POLD1 PTGES3 RAD23B RSEH2A RPA1 SET SMARCAD1 SUPV3L1 UBE2N XAB2 XRCC3	ATR BAX CDT1 CSNK1D CSNK1E DNMT3A GADD45G GATAD2A IL4 NOL8 OGG1 PARP3 POLD1 POLE PTGES3 RAD23B RBMS1 RSEH2A RPA1 SET SUPV3L1 UBE2N XAB2 XRCC3
MITOCHONDRION_ORGANIZATION_AND_BIOGENESIS	0.00553385		BAX BCL2 HSP90AA1 MSTO1 MTERF NDUFS4 TFB2M TIMM17A TRNT1	BAX BCL2 MTERF NDUFS4
CELLULAR_LOCALIZATION	0.00716398	0.00848163	ARFGEF2 ARFIP1 BCL2 CALR HPS4 HSP90AA1 KHDRBS1 KIF3B LMAN2L LYST MON2 MSTO1 MYO6 GPA PA NCKIPSD NF1 NFKBIE NPM1 NUP214 NUPL2 PEX10 SCAMP3 SEC22B SEC63 TAF3 TIMM17A TRAM1 TRNT1 TRPS1 UHMK1	ARFGEF2 ARFIP1 BCL2 CALR COPB1 DUSP16 ERGIC1 GSK3B HPS4 KHDRBS1 KIF3B KP4 LMAN2L LYST MYO1E GPA PA NCKIPSD NIN NOD2 NPM1 NUP214 NUPL2 PEX10 RAB2A RPL11 SCAMP3 SEC22B SEC63 SMAD3 SP23 SRGN TRPS1 UHMK1
RIBONUCLEOPROTEIN_COMPLEX_BIOGENESIS_AND_ASSEMBLY	0.00716398		CRNKL1 EIF2B5 EIF5 FBL MTIF3 NOLC1 NPM1 POP4 RRP9 SDAD1 SF1 SF3A2	CRNKL1 EIF2B5 EIF5 FBL MTIF3 NOLC1 NPM1 SDAD1 SF1
REGULATION_OF_NUCLEOBASE__NUCLEOSIDE__NUCLEOTIDE_AND_NUCLEIC_ACID_METABOLIC_PROCESS	0.00837048	0.020751	ARNTL ATR BUD31 CALR CCNH COMMD7 CREBBP DBP DRAP1 DYRK1B E2F1 ELK1 ERF FOXH1 HELLS HIF1A ID2 IRF8 KHDRBS1 KLF11 KLF9 MED27 MYO6 MYST3 NFATC1 NFATC2 NPM1 NR1D2 NR6A1 PA2G4 PDCD4 PIAS4 POLR2K PRKAR1A RUVBL1 SAP18 SET SIRT2 SMARCAD1 SMARCD2 SP1 TFAP4 UBE2N ZHX1	ARID5B ATF6 ATR CALR CDT1 CHD2 CHD4 CREBBP DBP DRAP1 ELF2 ERF FOXN1 GATAD2A HIF1A IL4 IRF8 JMJD1C KHDRBS1 LANCL2 MED27 MYST3 NFAM1 NFATC1 NFATC2 NOD2 NPM1 NRIP1 NSD1 PA2G4 PIAS4 POU2F1 PRKAR1A REST RUVBL1 SAP18 SET SIRT2 SMAD3 SMARCD2 SMARCD3 SP1 SP4 TFAP4 UBE2N ZHX1 ZHX2
ESTABLISHMENT_OF_PROTEIN_LOCALIZATION	0.00957873	0.0195458	ARFIP1 CALR HPS4 LMAN2L MYO6 GPA NCKIPSD NF1 NFKBIE NPM1 NUP214 NUPL2 PEX10 SEC63 TIMM17A TRAM1 TRNT1 TRPS1 UHMK1	ARFIP1 CALR DUSP16 GSK3B HPS4 KP4 LMAN2L GPA NCKIPSD NOD2 NPM1 NUP214 NUPL2 PEX10 RPL11 SEC63 SMAD3 SRGN TRPS1 UHMK1
REGULATION_OF_TRANSCRIPTION	0.00997015	0.0203783	ARNTL BUD31 CALR CCNH COMMD7 CREBBP DBP DRAP1 DYRK1B E2F1 ELK1 ERF FOXH1 HELLS HIF1A ID2 IRF8 KHDRBS1 KLF11 KLF9 MED27 MYO6 MYST3 NFATC1 NFATC2 NPM1 NR1D2 NR6A1 PA2G4 PDCD4 PIAS4 POLR2K PRKAR1A RUVBL1 SAP18 SIRT2 SMARCD2 SP1 TFAP4 UBE2N ZHX1	ARID5B ATF6 CALR CHD2 CHD4 CREBBP DBP DRAP1 ELF2 ERF FOXN1 GATAD2A HIF1A IL4 IRF8 JMJD1C KHDRBS1 LANCL2 MED27 MYST3 NFAM1 NFATC1 NFATC2 NOD2 NPM1 NRIP1 NSD1 PA2G4 PIAS4 POU2F1 PRKAR1A REST RUVBL1 SAP18 SIRT2 SMAD3 SMARCD2 SMARCD3 SP1 SP4 TFAP4 UBE2N ZHX1 ZHX2
ESTABLISHMENT_OF_CELLULAR_LOCALIZATION	0.0127412	0.00715814	ARFGEF2 ARFIP1 BCL2 CALR HPS4 HSP90AA1 KHDRBS1 KIF3B LMAN2L LYST MON2 MYO6 GPA PA NCKIPSD NF1 NFKBIE NPM1 NUP214 NUPL2 PEX10 SCAMP3 SEC22B SEC63 TIMM17A TRAM1 TRNT1 TRPS1 UHMK1	ARFGEF2 ARFIP1 BCL2 CALR COPB1 DUSP16 ERGIC1 GSK3B HPS4 KHDRBS1 KIF3B KP4 LMAN2L LYST MYO1E GPA PA NCKIPSD NOD2 NPM1 NUP214 NUPL2 PEX10 RAB2A RPL11 SCAMP3 SEC22B SEC63 SMAD3 SP23 SRGN TRPS1 UHMK1
COVALENT_CHROMATIN_MODIFICATION	0.0155949	0.0231714	CREBBP HELLS MYST3 SET SIRT2 UBE2N	CREBBP MYST3 NSD1 SET SIRT2 UBE2N
DNA_REPAIR	0.0155949		ATR CSNK1D CSNK1E GADD45A GADD45G GTF2H4 LIG4 PARP3 POLD1 RAD23B RPA1 UBE2N XAB2 XRCC3	ATR CSNK1D CSNK1E GADD45G OGG1 PARP3 POLD1 POLE RAD23B RPA1 UBE2N XAB2 XRCC3
PROTEIN_LOCALIZATION	0.0155949		ARFIP1 CALR HPS4 LMAN2L MYO6 GPA NCKIPSD NF1 NFKBIE NPM1 NUP214 NUPL2 PEX10 SEC63 TAF3 TIMM17A TRAM1 TRNT1 TRPS1 UHMK1	ARFIP1 CALR DUSP16 GSK3B HPS4 KP4 LMAN2L GPA NCKIPSD NOD2 NPM1 NUP214 NUPL2 PEX10 RPL11 SEC63 SMAD3 SRGN TRPS1 UHMK1
TRANSPORT	0.0155949	0.0125318	ABCC1 ABCF2 AP2S1 ARFGEF2 ARFIP1 ATP6V0B ATP6V1C1 ATP6V1H ATP7A BAX BCL2 CALR CHKA CHRNB1 EPN1 HPS4 HSP90AA1 KCNK5 KHDRBS1 KIF3B LASP1 LMAN2L LYST MAPK8IP3 MON2 MYO6 GPA PA NCKIPSD NF1 NFKBIE NPM1 NUP214 NUPL2 PEX10 SCAMP3 SEC22B SEC24B SEC63 SLC1A5 SLC25A22 SLC26A2 SLC2A3 SLC35B2 SLC7A6 STX8 TIMM17A TRAM1 TRNT1 TRPS1 UHMK1 YRDC	ABCC1 ABCF2 AP2S1 ARFGEF2 ARFIP1 ATP6V0B ATP6V1C1 ATP6V1H ATP7A BAX BCL2 CALR CHKA CHRNB1 COPB1 DUSP16 ELMO1 ERGIC1 GSK3B HPS4 KCNJ6 KCNK5 KHDRBS1 KIF3B KP4 LASP1 LMAN2L LYST MAPK8IP3 MYO1E GPA PA NCKIPSD NPM1 NUP214 NUPL2 PEX10 RAB2A RPL11 SCAMP3 SCN2B SEC22B SEC63 SLC1A2 SLC25A22 SLC26A2 SLC28A2 SLC2A1 SLC2A3 SLC7A6 SMAD3 SP23 SORBS1 STIM1 STIM2 STX8 TRPS1 UHMK1 YRDC
CELLULAR_BIOSYNTHETIC_PROCESS	0.0194053		ABCF1 AGPAT1 AGPAT6 ASMT DGAT2 DPH1 EIF2B5 EIF5 FARS2 HBS1L HSP90AA1 METAP1 MRPL23 MRPS7 MTIF3 CA OAZ1 PTGES3 RPL13 RPL14 RPL18A RPL3 RPS10 RPS12 RPS5 TLR3	ABCF1 AGPAT1 AGPAT6 ASMT COQ2 CPOX DPH1 EIF2B5 EIF5 ETF1 HBS1L IL4 MRPL23 MTIF3 CA OAZ1 PTGES3 RPL11 RPL13 RPL18A RPL3 RPS10 RPS5 TLR3
TRNA_PROCESSING	0.022744		FARS2 NSUN2 POP4 TRNT1
MACROMOLECULE_LOCALIZATION	0.025798		ARFIP1 CALR HPS4 KHDRBS1 LMAN2L MYO6 GPA NCKIPSD NF1 NFKBIE NPM1 NUP214 NUPL2 PEX10 SEC63 TAF3 TIMM17A TRAM1 TRNT1 TRPS1 UHMK1	ARFIP1 CALR DUSP16 GSK3B HPS4 KHDRBS1 KP4 LMAN2L GPA NCKIPSD NOD2 NPM1 NUP214 NUPL2 PEX10 RPL11 SEC63 SMAD3 SRGN TRPS1 UHMK1
POSITIVE_REGULATION_OF_CELLULAR_METABOLIC_PROCESS	0.0367149		ARNTL CCND2 CCND3 CCNH CREBBP DYRK1B EIF2B5 ELK1 FOXH1 HIF1A HSP90AA1 IL12A MYO6 MYST3 NFATC2 SP1 STUB1 TLR3 TPP1 UBE2N	ATF6 CCND2 CCND3 CD80 CREBBP EIF2B5 HIF1A IL12A IL4 MYST3 NFATC2 NRIP1 NSD1 SMAD3 SMARCD3 SP1 STUB1 TLR3 TPP1 UBE2N
ESTABLISHMENT_OF_LOCALIZATION	0.0373361	0.0140629	ABCC1 ABCF2 AP2S1 ARFGEF2 ARFIP1 ATP6V0B ATP6V1C1 ATP6V1H ATP7A BAX BCL2 CALR CHKA CHRNB1 EPN1 GRHPR HPS4 HSP90AA1 IFT88 KCNK5 KHDRBS1 KIF3B LASP1 LMAN2L LYST MAPK8IP3 MON2 MYO6 GPA PA NCKIPSD NF1 NFKBIE NPM1 NUP214 NUPL2 PEX10 SCAMP3 SEC22B SEC24B SEC63 SLC1A5 SLC25A22 SLC26A2 SLC2A3 SLC35B2 SLC7A6 STX8 TIMM17A TRAM1 TRNT1 TRPS1 UHMK1 YRDC	ABCC1 ABCF2 AP2S1 ARFGEF2 ARFIP1 ATP6V0B ATP6V1C1 ATP6V1H ATP7A BAX BCL2 CALR CHKA CHRNB1 COPB1 DUSP16 ELMO1 ERGIC1 GRHPR GSK3B GUCA2B HPS4 KCNJ6 KCNK5 KHDRBS1 KIF3B KP4 LASP1 LMAN2L LYST MAPK8IP3 MYO1E GPA PA NCKIPSD NOD2 NPM1 NUP214 NUPL2 PEX10 RAB2A RPL11 SCAMP3 SCN2B SEC22B SEC63 SLC1A2 SLC25A22 SLC26A2 SLC28A2 SLC2A1 SLC2A3 SLC7A6 SMAD3 SP23 SORBS1 SRGN STIM1 STIM2 STX8 TRPS1 UHMK1 YRDC
PROTEIN_EXPORT_FROM_NUCLEUS	0.0373361	0.00151236	CALR NUP214 NUPL2 UHMK1	CALR DUSP16 GSK3B NUP214 NUPL2 UHMK1
POSITIVE_REGULATION_OF_METABOLIC_PROCESS	0.0416125		ARNTL CCND2 CCND3 CCNH CREBBP DYRK1B EIF2B5 ELK1 FOXH1 HIF1A HSP90AA1 IL12A MYO6 MYST3 NFATC2 SP1 STUB1 TLR3 TPP1 UBE2N	ATF6 CCND2 CCND3 CD80 CREBBP EIF2B5 HIF1A IL12A IL4 MYST3 NFATC2 NRIP1 NSD1 SMAD3 SMARCD3 SP1 STUB1 TLR3 TPP1 UBE2N
REGULATION_OF_PROTEIN_MODIFICATION_PROCESS	0.0443263	0.00864509	CCND2 CCND3 IL12A NDUFS4 SET STUB1 UBE2N	CCND2 CCND3 CD80 IL12A NDUFS4 SET SOCS1 STUB1 UBE2N
PROTEOLYSIS	0.0471307		ADAM10 ADAMTS13 CASP6 ERAP1 FBXL6 PITRM1 RCE1 ST14 STUB1 TPP1 UBA3 UBE2G1 UBE2I UBE2L3 UBE2N UBR3 USP33	ADAM10 ADAMTS13 CASP6 PITRM1 PLAU PREP SRGN ST14 STUB1 TPP1 UBA3 UBE2G1 UBE2I UBE2L3 UBE2N UBR3 USP33
REGULATION_OF_IMMUNE_RESPONSE		0.00715814	IL12A TRAF6 UBE2N	FYN IL12A IL4 NFAM1 PTPRC TRAF2 TRAF6 UBE2N
POSITIVE_REGULATION_OF_IMMUNE_RESPONSE		0.0140629	IL12A TRAF6 UBE2N	FYN IL12A NFAM1 PTPRC TRAF2 TRAF6 UBE2N
SIGNAL_TRANSDUCTION		0.0170741	ACIN1 ADAM10 ADAM9 ANXA5 APPL1 ARFGEF2 ARFIP2 ATR BAX CASP8AP2 CD164 CDC42SE2 CDKN2AIP CHRNB1 COMMD7 CSNK1D CSNK1E DTX1 DUSP4 EDARADD ESR1 FFAR2 FOXH1 G3BP1 GADD45G GNB1 HBS1L IL12A IL9R IRAK1BP1 ITPKA KHDRBS1 LANCL1 LYST MAP4K2 MAPK8IP3 MAPK9 MARK2 MKNK1 MTCH1 MYO6 NCKIPSD NDUFS4 NF1 NFATC1 NFKBIB NPM1 PDAP1 PIP4K2B PPFIA1 PRKAB2 PRKACB PRKAR1A PRMT2 PTGES3 PWP2 RANBP1 RANGAP1 RPS6KA3 RRAGC SH2D…	ACIN1 ADAM10 ADAM9 AKAP12 ANXA5 ARFGEF2 ARFIP2 ATF6 ATR BAX BCAR3 CASP8AP2 CCBP2 CD164 CDC42SE2 CDKN2AIP CHRNB1 CREBL2 CSNK1D CSNK1E DLG4 DTX1 DUSP16 DUSP6 EDARADD ELMO1 ESR1 FYN G3BP1 GADD45G GCG G12 GL GNB1 GNB2 GSK3B HBS1L HIPK2 IL12A IL9R INPP4A IRAK3 ITPK1 ITPR2 KHDRBS1 KLRG1 LATS2 LYST MAP2K1 MAP2K6 MAP3K5 MAP4K1 MAP4K2 MAPK8IP3 MAPK9 MARK2 MTCH1 NCKIPSD NDUFS4 NEDD9 NFAM1 NFATC1 NOD1 NOD2 …
NEGATIVE_REGULATION_OF_CELLULAR_PROCESS		0.0174815	AATF ADAM10 ANXA5 ATR BAX BCL2 BNIP1 CD164 CDK6 CDKN2AIP COMMD7 DLG1 DRAP1 DTX1 E2F1 GADD45A HBXIP HELLS HSPA1B ID2 IRF8 KHDRBS1 KLF11 MAPRE1 MYST3 NF1 NFKBIE NPM1 NR6A1 PA2G4 PDCD4 PIAS4 SET SIRT2 TAX1BP3 UHMK1 YRDC ZHX1	ADAM10 AIF1 ANXA5 ARID5B ATR BAX BCL2 BNIP1 CD164 CDC42 CDK6 CDKN2AIP CDT1 DLG1 DRAP1 DTX1 GATAD2A GSK3B HBXIP IL4 IRF8 KHDRBS1 LANCL2 LATS2 MAP2K6 MAPRE1 MYST3 NFKB1 NPM1 NRIP1 NSD1 PA2G4 PIAS4 POU2F1 PPP1R13B PTPRC RUNX3 SEMA4D SET SIRT2 SMAD3 SOCS1 STIM2 TAX1BP3 TNFAIP8 UHMK1 YRDC ZHX1 ZHX2
REGULATION_OF_PROTEIN_METABOLIC_PROCESS		0.0191443	CCND2 CCND3 EIF2B5 EIF5 IL12A MAPRE1 METAP1 MTIF3 NDUFS4 SET STUB1 TLR3 TPP1 UBE2N	CCND2 CCND3 CD80 CDC42 EIF2B5 EIF5 ETF1 IL12A IL4 IRAK3 MAPRE1 MTIF3 NDUFS4 SET SOCS1 STUB1 TLR3 TPP1 UBE2N
PROTEIN_AMINO_ACID_PHOSPHORYLATION		0.0203195	ADAM10 CCND2 CCND3 CDK2AP1 CSNK1D CSNK1E DYRK1B IL12A JAK3 MAP4K2 MARK2 MKNK1 NDUFS4 PIM2 PLK3 PRKACB PRKX STK16 TWF1 UHMK1	ADAM10 CCND2 CCND3 CD80 CSNK1D CSNK1E FGR GSK3B IL12A IRAK3 LATS2 LMTK2 MAP2K6 MAP4K1 MAP4K2 MARK2 NDUFS4 PIM2 PLK3 PRKCD PRKG1 PRKX SOCS1 STK17B TWF1 UHMK1
MACROMOLECULAR_COMPLEX_DISASSEMBLY		0.0203783	MTERF MTIF3 SET	ETF1 IRAK3 MTERF MTIF3 SET
HISTONE_MODIFICATION		0.020751	CREBBP MYST3 SET SIRT2 UBE2N	CREBBP MYST3 NSD1 SET SIRT2 UBE2N
NUCLEAR_TRANSPORT		0.020751	CALR KHDRBS1 NCKIPSD NF1 NFKBIE NPM1 NUP214 NUPL2 TRPS1 UHMK1	CALR DUSP16 GSK3B KHDRBS1 KP4 NCKIPSD NPM1 NUP214 NUPL2 SMAD3 TRPS1 UHMK1
NUCLEOCYTOPLASMIC_TRANSPORT		0.020751	CALR KHDRBS1 NCKIPSD NF1 NFKBIE NPM1 NUP214 NUPL2 TRPS1 UHMK1	CALR DUSP16 GSK3B KHDRBS1 KP4 NCKIPSD NPM1 NUP214 NUPL2 SMAD3 TRPS1 UHMK1
POSITIVE_REGULATION_OF_BIOLOGICAL_PROCESS		0.020751	ACIN1 ARNTL BAX BNIP1 CASP6 CASP8AP2 CCND2 CCND3 CCNH CDK4 CDK6 CDKN2AIP CREBBP DYRK1B EIF2B5 ELK1 FOXH1 HIF1A HPS4 HSP90AA1 IL12A MTCH1 MYO6 MYST3 NDUFS4 NF1 NFATC2 NOL8 PDCD6 SLC35B2 SP1 STUB1 TLR3 TMEM9B TPP1 TRAF6 TSPAN31 UBE2N ZDHHC13	ACIN1 ATF6 BAX BNIP1 CASP6 CASP8AP2 CCND2 CCND3 CD80 CDC42 CDK6 CDKN2AIP CREBBP DAP EIF2B5 FYN GSK3B HIF1A HIPK2 HPS4 IL12A IL4 LAMC1 MAP3K5 MTCH1 MYST3 NDUFS4 NFAM1 NFATC2 NOD1 NOD2 NOL8 NRIP1 NSD1 PPP1R13B PPP5C PTPRC REL RUNX3 SMAD3 SMARCD3 SP1 STIM1 STK17B STUB1 TLR3 TMEM9B TPP1 TRAF2 TRAF6 UBE2N ZDHHC13
PROTEIN_KINASE_CASCADE		0.020751	ADAM9 DUSP4 EDARADD GADD45G IL12A IRAK1BP1 MAP4K2 MAPK8IP3 MAPK9 MARK2 MKNK1 NF1 SLC35B2 SPRED2 TMEM9B TRAF6 UBE2N ZDHHC13	ADAM9 DUSP16 DUSP6 EDARADD FYN GADD45G HIPK2 IL12A LATS2 MAP3K5 MAP4K1 MAP4K2 MAPK8IP3 MAPK9 MARK2 NOD1 NOD2 PPP5C REL SOCS1 SPRED2 STK17B TMEM9B TRAF2 TRAF6 UBE2N ZDHHC13
NEGATIVE_REGULATION_OF_BIOLOGICAL_PROCESS		0.0218364	AATF ADAM10 ANXA5 ATR BAX BCL2 BNIP1 CD164 CDK6 CDKN2AIP COMMD7 DLG1 DRAP1 DTX1 E2F1 GADD45A HBXIP HELLS HSPA1B ID2 IRF8 KHDRBS1 KLF11 MAPRE1 MYST3 NF1 NFKBIE NPM1 NR6A1 PA2G4 PDCD4 PIAS4 SET SIRT2 TAX1BP3 UHMK1 YRDC ZHX1	ADAM10 AIF1 ANXA5 ARID5B ATR BAX BCL2 BNIP1 CD164 CDC42 CDK6 CDKN2AIP CDT1 DLG1 DRAP1 DTX1 GATAD2A GSK3B HBXIP IL4 IRF8 KHDRBS1 LANCL2 LATS2 MAP2K6 MAPRE1 MYST3 NFKB1 NPM1 NRIP1 NSD1 PA2G4 PIAS4 POU2F1 PPP1R13B PTPRC RUNX3 SEMA4D SET SIRT2 SMAD3 SOCS1 SRGN STIM2 TAX1BP3 TNFAIP8 UHMK1 YRDC ZHX1 ZHX2
NUCLEAR_EXPORT		0.0223887	CALR KHDRBS1 NUP214 NUPL2 UHMK1	CALR DUSP16 GSK3B KHDRBS1 NUP214 NUPL2 UHMK1
REGULATION_OF_CYTOKINE_PRODUCTION		0.0231714	HIF1A IL12A TRAF6	HIF1A IL12A NOD2 SMAD3 TRAF2 TRAF6
ACTIVATION_OF_IMMUNE_RESPONSE		0.0253293	TRAF6 UBE2N	FYN NFAM1 PTPRC TRAF6 UBE2N
POSITIVE_REGULATION_OF_CELLULAR_PROCESS		0.0254481	ACIN1 ARNTL BAX BNIP1 CASP6 CASP8AP2 CCND2 CCND3 CCNH CDK4 CDK6 CDKN2AIP CREBBP DYRK1B EIF2B5 ELK1 FOXH1 HIF1A HSP90AA1 IL12A MTCH1 MYO6 MYST3 NDUFS4 NF1 NFATC2 NOL8 PDCD6 SLC35B2 SP1 STUB1 TLR3 TMEM9B TPP1 TRAF6 TSPAN31 UBE2N ZDHHC13	ACIN1 ATF6 BAX BNIP1 CASP6 CASP8AP2 CCND2 CCND3 CD80 CDC42 CDK6 CDKN2AIP CREBBP DAP EIF2B5 GSK3B HIF1A HIPK2 IL12A IL4 LAMC1 MAP3K5 MTCH1 MYST3 NDUFS4 NFAM1 NFATC2 NOD1 NOD2 NOL8 NRIP1 NSD1 PPP1R13B PPP5C PTPRC REL RUNX3 SMAD3 SMARCD3 SP1 STIM1 STK17B STUB1 TLR3 TMEM9B TPP1 TRAF6 UBE2N ZDHHC13
CELLULAR_COMPONENT_ASSEMBLY		0.0323122	ADRM1 AP2S1 BAX CREBBP CRNKL1 EIF2B5 EIF5 HELLS LLGL1 MED27 MTIF3 NDUFS4 NPM1 PARD6B SET SF1 SF3A2 SLC7A6 STK16 TCEB2	ADRM1 AP2S1 BAX CAPZA1 CD2AP CD9 CDC42 CREBBP CRNKL1 DLG4 E2F3 EIF2B5 EIF5 LAMC1 MED27 MTIF3 NDUFS4 NOD1 NOD2 NPM1 SET SF1 SLC7A6 SMAD3 TCEB2 TRAF2
GOLGI_VESICLE_TRANSPORT		0.0323122	LMAN2L MON2 PA SCAMP3 SEC22B	COPB1 ERGIC1 LMAN2L PA RAB2A SCAMP3 SEC22B SP23
REGULATION_OF_CELLULAR_PROTEIN_METABOLIC_PROCESS		0.0323122	CCND2 CCND3 EIF2B5 EIF5 IL12A MAPRE1 METAP1 MTIF3 NDUFS4 SET STUB1 TLR3 TPP1 UBE2N	CCND2 CCND3 CD80 EIF2B5 EIF5 ETF1 IL12A IL4 MAPRE1 MTIF3 NDUFS4 SET SOCS1 STUB1 TLR3 TPP1 UBE2N
MACROMOLECULAR_COMPLEX_ASSEMBLY		0.0335316	ADRM1 BAX CREBBP CRNKL1 EIF2B5 EIF5 LLGL1 MED27 MTIF3 NDUFS4 NPM1 PARD6B SET SF1 SF3A2 SLC7A6 STK16 TCEB2	ADRM1 BAX CAPZA1 CD2AP CD9 CDC42 CREBBP CRNKL1 DLG4 E2F3 EIF2B5 EIF5 LAMC1 MED27 MTIF3 NDUFS4 NOD1 NOD2 NPM1 SET SF1 SLC7A6 SMAD3 TCEB2 TRAF2
CYTOKINE_PRODUCTION		0.0352586	HIF1A IL12A TLR3 TRAF6	HIF1A IL12A IL4 NOD1 NOD2 SMAD3 SRGN TLR3 TRAF2 TRAF6
PHOSPHORYLATION		0.0352586	ADAM10 CCND2 CCND3 CDK2AP1 CSNK1D CSNK1E DYRK1B IL12A JAK3 MAP4K2 MARK2 MKNK1 NDUFS4 PIM2 PLK3 PRKACB PRKX STK16 TWF1 UHMK1	ADAM10 CCND2 CCND3 CD80 CSNK1D CSNK1E FGR GSK3B IL12A IL4 IRAK3 LATS2 LMTK2 MAP2K6 MAP4K1 MAP4K2 MARK2 NDUFS4 PIM2 PLK3 PRKCD PRKG1 PRKX SOCS1 STK17B TWF1 UHMK1
POSITIVE_REGULATION_OF_CELLULAR_PROTEIN_METABOLIC_PROCESS		0.0352586	CCND2 CCND3 EIF2B5 IL12A STUB1 TLR3 TPP1 UBE2N	CCND2 CCND3 CD80 EIF2B5 IL12A IL4 STUB1 TLR3 TPP1 UBE2N
POSITIVE_REGULATION_OF_PROTEIN_MODIFICATION_PROCESS		0.0390261	CCND2 CCND3 IL12A STUB1 UBE2N	CCND2 CCND3 CD80 IL12A STUB1 UBE2N
MACROMOLECULE_BIOSYNTHETIC_PROCESS		0.0402512	ABCF1 ALG1 ASMT DPH1 EIF2B5 EIF5 FARS2 GALNT6 HBS1L METAP1 MRPL23 MRPS7 MTIF3 CA PIGF RPL13 RPL14 RPL18A RPL3 RPS10 RPS12 RPS5 TLR3 TUSC3	ABCF1 ALG1 ASMT B4GALT1 DPH1 EIF2B5 EIF5 ETF1 GALNT6 HBS1L IL4 MRPL23 MTIF3 CA NOD1 PGGT1B PIGF PTPRC RPL11 RPL13 RPL18A RPL3 RPS10 RPS5 TLR3 TUSC3 XYLT1
POSITIVE_REGULATION_OF_IMMUNE_SYSTEM_PROCESS		0.0402512	IL12A TRAF6 UBE2N	FYN IL12A IL4 NFAM1 PTPRC TRAF2 TRAF6 UBE2N
POSITIVE_REGULATION_OF_PROTEIN_METABOLIC_PROCESS		0.0402512	CCND2 CCND3 EIF2B5 IL12A STUB1 TLR3 TPP1 UBE2N	CCND2 CCND3 CD80 EIF2B5 IL12A IL4 STUB1 TLR3 TPP1 UBE2N
PEPTIDYL_AMINO_ACID_MODIFICATION		0.0406687	CREBBP IL12A METAP1 TUSC3 UHMK1	CD80 CREBBP GSK3B IL12A MAP4K1 SOCS1 TPST2 TUSC3 UHMK1
REGULATION_OF_PROTEIN_AMINO_ACID_PHOSPHORYLATION		0.0425103	CCND2 CCND3 IL12A NDUFS4	CCND2 CCND3 CD80 IL12A NDUFS4 SOCS1
POSITIVE_REGULATION_OF_RESPONSE_TO_STIMULUS		0.0448507	IL12A TRAF6 UBE2N	FYN IL12A NFAM1 PTPRC TRAF2 TRAF6 UBE2N

## Sheet: Tab2
Tab 2: Enriched pathways in genes lost greater than 25% H3K27ac at either their promoters or enhancers in human lymphoma CREBBP KD MD901 cells compared to scramble KD cells.
Pathway Name	BH correted p value for loss.25.promoter.gene	BH correted p value for loss.25.enhancer.gene	Overlapping genes in loss.25.promoter.gene	Overlapping genes in loss.25.enhancer.gene
ABC_gt_GCB_Affy	0.00766788	0.000172265	CSNK1E GOT2 IRF4 MARCKS PIM1 PTPN1 SPIB TCF4	CSNK1E ENTPD1 FUT8 GOT2 IL16 IRF4 MARCKS PRKCB PTPN1 SPIB
ABC_gt_GCB_LC		0.00234159	FOXP1 IRF4 PIM1 PTPN1	ENTPD1 ETV6 FOXP1 FUT8 IL16 IRF4 PTPN1
BCL6_repressed		0.0478849	CXCR4 NFKB1 PRDM1 STAT1	CD80 CDKN1A CXCR4 ID2 NFKB1 STAT1
BCL6_targets_CHIPCHIP	7.28922e-24	1.74579e-10	ACIN1 ACOT7 ALG5 ALOX5 AP4B1 ARHGAP1 ARID1B ARID5A ATF4 ATP6V0B BRPF1 CAMK2D CBX3 CCDC41 CD74 CD99L2 CDC20 CDK7 CEP57 CHEK1 CHEK2 CITED2 COMMD5 COX8A CPEB3 CRIPT CSAD CSNK2A1 CTDSPL2 CXCR4 DCLRE1B DCTN5 DDX28 DEPDC4 DNAJB11 DUS2L EEF1A1 EIF4G2 ENY2 ESRRA EXOSC8 FAM119A FAM120A FAM60A FAM76B FBXO5 FICD FKBP5 FLJ37453 FOXJ3 GMFG HDAC3 HIST1H4E HNRNPA2B1 HNRNPD HPCAL1 HSCB HSP90B1 IL23A ITPRIPL1 JMJ…	ACIN1 ALG5 ALOX5 ARHGAP1 ARID1B ARID5A BANF1 BRPF1 CAMK2D CARD11 CBX3 CD38 CDK7 CDYL CHEK1 CITED2 COMMD5 COX8A CSNK2A1 CXCR4 DCTN4 DGKD DLEU2 DNAJB11 DUS2L EEF1A1 ELF4 ELOVL5 ENY2 ESRRA FAM119A FAM60A FAM76B FBXO5 FICD FKBP5 FLJ37453 FOXJ3 GAB1 GADD45B GFOD1 HIST1H4E HIST1H4J HNRNPD HPCAL1 HSP90B1 ITGB3BP ITPK1 ITPRIPL1 JMJD1C JMJD6 LBR LDLR LNPEP LRRC33 MARCH5 MEMO1 MLF1IP MSI2 MYO9B MYST4 NCAPG…
Blimp_Bcell_repressed	0.000112434	1.6516e-07	ALOX5 ATP2A3 BTK CD27 CD74 CIITA DEK EBF1 FCRLA GCET2 HLA-DMB HLA-DPA1 HLA-DPB1 HLA-DQA1 HLA-DRA NR1H2 SPIB ST6GAL1 SYK TLR10 VPREB3	ALOX5 ARHGDIB ATP2A3 BTK CD27 CIITA CXCR5 DEK EBF1 FCRLA GCET2 HLA-DPB1 HLA-DQA1 HLA-DRA HLA-DRB1 IL16 INPP5D LYN NR1H2 PAG1 PAX5 PLEK SPIB SYK TLR10
Blimp_proliferation_repressed	4.35067e-22	4.92364e-13	ACTB ACTL6A ADSS ANP32A AURKA CDC20 CDK2 CDKN2C CKS2 CORO1A CSK CYFIP2 DHFR DNMT1 DUT EIF4EBP1 GNAS GNB2 GOT2 GSTP1 IFI16 LCK LDHA MCM2 MCM4 MCM7 MTHFD2 MYBL2 NECAB3 NPM1 ODC1 PA2G4 PARP1 PCNA PHC2 PHKG2 PKMYT1 PLK1 PMS2L5 PRIM1 PRKDC PSMB9 PTDSS1 RAD23B SCARB1 TACC3 TUBB TUBG1 UCP2 VEGFA YWHAQ	ACTL6A ADSS ANP32A AURKA CDK2 CDKN2C CORO1A CSK CYFIP2 DNMT1 DUT EIF4EBP1 GNAS GNB2 GOT2 GSTP1 IKZF1 MCM2 MCM7 MTHFD2 MYBL2 NECAB3 NPM1 PA2G4 PCNA PHC2 PLK1 PMS2L5 PRIM1 PRKDC RAD23B RPS6KA1 SCARB1 SH3KBP1 TMSB4X TUBB TUBG1 VEGFA XRCC5
Blood_CD4+Tcell_gt_thymic_SP_CD4+Tcell		0.0255252	AIM1 CEP68 CXCR4 FLJ43663 IL10RA ISG20 LRIG1 MAP3K5 NPC2 NR3C2 SLC39A10	AIM1 CD48 CXCR4 FLJ43663 ISG20 LITAF LRIG1 PION PRKCA RASA3 RNF157 SERPINB6 SLC39A10 SORL1
BreastCa_70gene_Bad	0.00527285	0.00851814	CCNE2 CENPA DCK DTL FBXO31 MCM6 MELK NUSAP1 ORC6L OXCT1 PRC1 RAB6A RFC4	CCNE2 CENPA DCK DTL ECT2 FBXO31 FLT1 MCM6 MELK NUSAP1 OXCT1 PALM2-AKAP2
CD40_downregulated_Burkitt_lymphoma		6.77177e-05	CD27 CTDSP2 HSD17B8 ID3 IRS1 ISG20 KCNN3 LETMD1 NCF4 NCOR1 PTP4A2 RASGRP2 SYK TCF3 TSPO UBE2J1	ARL4C BIK CD27 CD38 CTDSP2 DFNA5 HDAC9 ID3 IRS1 ISG20 ITGB7 KCNN3 LETMD1 NCF4 NINJ1 PALM2-AKAP2 PTP4A2 RASGRP2 ST3GAL6 SYK TCF3 TSPO
CD40_upregulated_Burkitt_lymphoma	0.0499577	3.96185e-08	CD58 CD74 DUSP2 HLA-DMB HLA-DPB1 HLA-DQA1 ICOSLG IRF4 IRF5 JUNB NFKBIA PIK3CD RAC2 RGS1 SH2B3 STAT1 TAP1 TMC6 TNFAIP8 TXNDC11 ZEB1	CCR7 CD58 CD83 CXCR5 DDIT4 DUSP2 GADD45B HLA-DPB1 HLA-DQA1 HLA-DRB1 ICOSLG IL1B IRF4 IRF5 LITAF LYN MTMR4 PHACTR1 PIK3CD PLEK PLXNC1 PTK2B PTP4A3 RAC2 RGS1 RXRA SH2B3 SLAMF1 STAT1 TMC6 TMSB4X TNFAIP8 TNFSF9 TXNDC11
CD8_T_effectorUp_memoryUp_NaiveDn	0.0354753		ARHGDIA ATG2A CD58 CD74 FAM129A PEA15 PLCD1 PTPN7 SLC1A5	ARHGDIA ATG2A CD58 PEA15 PLCD1 PLXND1 PTPN7 SH3KBP1
CLL_unmutated_gt_CLL_mutated		0.00134831	FKBP5 FLNB MYLK PFKP RRBP1 XBP1 ZAP70	APBB2 DTX1 FKBP5 FLNB MSI2 MYLK PFKP RRBP1 TPST2 ZAP70
Cell_cycle_Cho	1.1466e-19	3.47257e-14	AP1M1 ARF6 ARL5B ARL6IP1 ARPC1B ATAD2 ATF4 ATP6V1E1 AURKA BRIP1 BUB1 BUB3 CARHSP1 CCNB1 CCNB2 CCND3 CCNG2 CD3EAP CDC20 CDC25A CDCA8 CDK9 CDKN2D CENPA CHEK1 CKS2 COPB2 CSE1L CTDSP2 CUTC DDX17 DDX39 DLGAP5 DUSP12 E2F5 EDEM3 EGR1 ELOVL6 EPC1 ESRRA EXOSC10 FBXO5 FKBP8 FLNB FOXM1 FOXP1 GGH GLCCI1 GMNN GNA13 GRPEL1 H2AFX HGS HIST1H2AC HIST1H4C HMMR HNRNPD HNRNPF HSPA5 ID3 IMMT KHSRP KIAA1949 KIF11 KIF1…	AP1M1 ARF6 ARL5B ARL6IP1 ARPC1B ATP6V1E1 AURKA BRIP1 BUB1 BUB3 CARHSP1 CCNB1 CCND3 CDC25A CDCA8 CDK9 CENPA CHD2 CHEK1 CLPTM1L COPB2 CSE1L CTDSP2 CUTC DDIT4 DDX17 DDX39 DGKG DLGAP5 E2F5 EDEM3 EFNA3 EGR1 ELOVL6 EPC1 ERCC1 ESRRA EXOSC10 FAM107B FAM65A FBXO5 FLNA FLNB FLT1 FOXM1 FOXP1 FUT8 GADD45B GRPEL1 HBEGF HGS HMMR HNRNPD HNRNPF HSPA5 HUWE1 ID3 IER2 IKZF1 IMMT KHSRP KIAA0391 KIAA1949 KIF2C KIFC1 …
Cell_cycle_Cho&Whitfield	1.42874e-21	1.01261e-07	ARL6IP1 ATAD2 AURKA BUB1 BUB3 CCNB1 CCNB2 CDC20 CDC25A CDCA8 CDKN2D CENPA CKS2 DLGAP5 E2F5 FOXM1 GMNN GRPEL1 H2AFX HIST1H2AC HIST1H4C HMMR KIF11 KIF14 KIF2C KIFC1 KPNA2 MCM4 MCM6 MCM7 MELK MKI67 NECAB3 NUP98 PHF15 PKMYT1 PLK1 POLD3 RAD21 RFC4 RGS3 RNPS1 SETD8 SLBP SMTN TACC3 TOP2A TPX2 TROAP TTK UBE2C ZNF367	ARL6IP1 AURKA BUB1 BUB3 CCNB1 CDC25A CDCA8 CENPA DLGAP5 E2F5 FOXM1 GRPEL1 HMMR KIF2C KIFC1 KPNA2 MCM6 MCM7 MELK MKI67 NECAB3 NFIC NUP98 PLK1 POLD3 RAD21 RGS3 RUNX1 SMTN TOP2A TTK UBE2C
Cell_cycle_Liu	1.30091e-45	5.2932e-24	ANLN ARGLU1 ARL6IP1 ATAD2 AURKA AURKB BIRC5 BRIP1 BUB1 BUB1B BUB3 CASP2 CASP8AP2 CCDC99 CCNB1 CCNB2 CCNE1 CCNE2 CDC25A CDC25B CDC6 CDCA2 CDCA3 CDCA4 CDCA5 CDCA8 CDKN2AIP CDKN3 CENPA CENPE CENPF CIITA CKAP2L CKS2 CLSPN CREBZF CTCF DEPDC1 DEPDC1B DHFR DKC1 DLGAP5 DTL E2F2 E2F8 EIF4G2 ENTPD5 ESCO2 EXO1 FAM111B FEN1 FZR1 GMNN GTSE1 H2AFX HJURP HMGB2 HMMR HSPA8 INCENP IVNS1ABP KIF11 KIF20B KIFC1 KPNA2…	AKIRIN2 ANLN ARL6IP1 AURKA AURKB BRIP1 BUB1 BUB1B BUB3 CASP2 CASP8AP2 CCDC99 CCNB1 CCNE2 CDC25A CDC25B CDC6 CDCA4 CDCA8 CDKN2AIP CDKN3 CENPA CENPE CENPF CIITA CKAP2L CTCF DEPDC1 DEPDC1B DKC1 DLGAP5 DTL E2F2 ECT2 ENTPD5 ESCO2 FAM111B FZR1 GTSE1 HIST1H4B HJURP HMGB2 HMMR HSPA8 INCENP IVNS1ABP KIF20B KIFC1 KPNA2 LASS2 LBR MASTL MCM6 MKI67 MLF1IP NCAPD2 NDUFV1 NECAB3 NEK2 NUSAP1 PCNA PIF1 PLK1 PMS1 P…
Cell_cycle_Whitfield	1.24192e-48	1.16886e-25	ABHD10 AMD1 ANLN ANP32B ANP32E AP4B1 ARGLU1 ARHGAP11A ARHGAP19 ARL6IP1 ARMC1 ASF1B ASXL1 ATAD2 AURKA AURKB BARD1 BIRC5 BRCA1 BRIP1 BUB1 BUB1B BUB3 CASP8AP2 CBX3 CCDC99 CCNB1 CCNB2 CCNE1 CCNE2 CDC20 CDC25A CDC25B CDC25C CDC6 CDC7 CDCA3 CDCA5 CDCA8 CDK7 CDKN2AIP CDKN2C CDKN2D CDKN3 CDR2 CENPA CENPE CENPF CENPM CEP57 CEP70 CHAF1A CHEK2 CIITA CKAP2L CKS2 CLSPN CREBZF CTCF DCTN6 DDX11 DEPDC1B DHFR DKC…	ABHD10 AKIRIN2 ANLN ANP32B ARHGAP19 ARHGDIB ARL6IP1 ARMC1 AURKA AURKB BAG3 BARD1 BRCA1 BRIP1 BUB1 BUB1B BUB3 CADM1 CASP8AP2 CBX3 CCDC99 CCNB1 CCNE2 CDC25A CDC25B CDC25C CDC6 CDC7 CDCA8 CDK7 CDKN2AIP CDKN2C CDKN3 CDR2 CENPA CENPE CENPF CENPM CFD CHAF1A CIITA CKAP2L CTCF DDX11 DEPDC1B DKC1 DLGAP5 DNA2 DNAJB9 DR1 E2F2 E2F5 ECT2 EIF4E ENOSF1 ENTPD5 ESCO2 FAM111B FANCD2 FANCI FOXM1 FZR1 GINS2 GOLT1B G…
Dendritic_cell_CD123pos_blood	1.66043e-05	2.58269e-11	BCL11A BSPRY CDCA7L CREB3L2 CRYM CTNS CXXC5 DCK DSN1 EPDR1 ERO1LB ETS1 FCHSD2 FCRLA FLJ43663 FYCO1 GEN1 GGH GLCCI1 IGF2R ITPR2 KCTD5 KPTN LIME1 LMAN1 LOC400657 MAGED1 MDC1 MYBL2 N4BP2L1 NUCB2 PCNT PET112L PPP1R14B PRMT7 PTCRA PTPRCAP RABGAP1L RNASEH2B RRBP1 S100PBP SELS SEPT1 SERPINI1 SIDT1 SIVA1 SLC1A4 SLC20A1 SLC39A6 SMC6 SPIB ST6GALNAC4 STMN1 TBC1D24 TCF3 TCF4 TCL6 TLR9 TMEM194A TMEM53 TNFRSF2…	AEBP1 ALOX5AP APBB1IP APP ARHGAP24 BCL11A BSPRY CARD11 CD2AP CDCA7L CDH23 CDYL CLCN5 COBLL1 CREB3L2 CRYM CTNS CXXC5 DCK DERL3 DMXL1 DSN1 EPDR1 ERN1 ETS1 FAM129C FCHSD2 FCRLA FLJ43663 FYCO1 GAB1 GEN1 HIVEP1 IGF2R ITPR2 KCTD5 KIAA0802 KIAA1274 LIME1 LMAN1 LY9 MAGED1 MDC1 MXRA7 MYBL2 N4BP2L1 NUCB2 OFD1 PAG1 PCNT PPP1R14B PPP1R16B PRKCH PRMT7 PROC PTPRCAP RABGAP1L RNASEH2B RRBP1 S100PBP SCAMP5 SELS S…
E2F3_overexpression_2x_up		0.0231394	ATAD2 BCOR CCNE1 CCNE2 CDKN2C CHST7 DCK DCLRE1B DTL E2F7 FAM119A FEN1 GINS1 GNAS PCNA POLE PTCH1 PXMP2 RAB26 SAC3D1 SH3BGR TLCD1 ZNF275 ZNF367	ABCG2 BCOR CCNE2 CD83 CDKN2C CHST7 CRELD2 DCK DTL E2F7 FAM119A GNAS PCNA PHTF2 PKN3 PLCL2 PLXND1 POLE PTCH1 RAB26 SH3BGR SLC27A3 SMAD6 TIAM1 TLCD1 UGT8 ZNF275
G2_M_phase	8.79895e-05	0.0116356	ASPM AURKA AURKB BIRC5 CENPF PLK1	AURKA AURKB CENPF PLK1
GC_B_cell_BL_equal_DLBCL	0.0499577	3.43352e-05	ABCA11P AP4S1 ARHGAP19 ARL5B BCAS4 BRWD1 CCDC126 CCNB2 CD27 CECR7 DBNL DCK E2F5 ELL3 GPR160 HDHD1A HS2ST1 KATNAL1 KCNJ1 KCNN3 LANCL1 LNPEP LRCH3 LRRK1 MBD4 MNS1 NFYB POLH POU4F1 PRDM15 PRKCD RBM6 SCRN1 SEC14L1 SGPP1 SYK TRIM14 TRIM59 UBE2J1 USP53 VAMP1 ZNF718	ABCA11P ALPK1 AP4S1 ARHGAP19 ARL5B ARSG BCAS4 BFSP2 CCDC69 CD27 CECR7 CLLU1 COTL1 DBNL DCK DFNA5 E2F5 ELL3 GPR160 HS2ST1 IGF2BP3 IKZF1 ITGAE KATNAL1 KCNJ1 KCNN3 KIAA1211 KLHL6 LANCL1 LNPEP LRRK1 MNS1 NEDD9 NFYB PAG1 PIP4K2A POU4F1 PRKCD RBM6 RNF144B SCRN1 SGPP1 SH3KBP1 STAG3 SYK SYPL1 TRIM14 TRIM59 TXLNB USP53 WDR66 ZNF718
GC_B_cell_BLhigh_DLBCLlow		0.00732962	ACY3 DOK3 GCET2 KIAA0922 PEX5 PRDM15 SSBP2 VPREB3	ACY3 AFF2 CD38 GCET2 KIAA0922 LHFP MME PEX5 RNFT2 ST14 SUSD3
GC_B_cell_U133Plus		1.21223e-06	ABCA11P ACY3 AP4S1 ARHGAP19 ARL5B BCAS4 BRWD1 CCDC126 CCNB2 CD27 CECR7 DBNL DCK DOK3 E2F5 ELL3 EPSTI1 ETS1 GCET2 GPR160 HDHD1A HS2ST1 KATNAL1 KCNJ1 KCNN3 KIAA0922 LANCL1 LNPEP LRCH3 LRRK1 MBD4 MNS1 NFYB PEX5 POLH POU4F1 PRDM15 PRKCD RBM6 SCRN1 SEC14L1 SGPP1 SOCS1 SSBP2 SYK TBC1D2 TRIM14 TRIM59 UBE2J1 USP53 VAMP1 VPREB3 ZNF718	ABCA11P ACY3 AFF2 AIM2 ALPK1 AP4S1 ARHGAP19 ARL5B ARSG BCAS4 BFSP2 CCDC69 CD27 CD38 CD80 CECR7 CLLU1 COTL1 DBNL DCK DFNA5 E2F5 ELL3 ETS1 GCET2 GPR160 HECW2 HS2ST1 IGF2BP3 IKZF1 ILDR1 ITGAE KATNAL1 KCNJ1 KCNN3 KIAA0922 KIAA1211 KLHL6 LANCL1 LHFP LNPEP LRRK1 MAML3 MME MNS1 NEDD9 NFYB NINJ2 PAG1 PEX5 PIP4K2A POU4F1 PRKCD RBM6 RNF144B RNFT2 SCRN1 SGPP1 SH3KBP1 SPAG16 ST14 STAG3 SUSD3 SYK SYPL1 TRIM14…
GC_T_helper_up2x_Chtanova	0.0234625	3.62512e-07	ANKRD13A ARID1B ATAD2B BCL7B C2CD2 CASD1 CBX4 CD27 CEPT1 CIRBP CNOT6L CSK CXXC5 CYFIP2 DCP2 DGKA DIP2A DNAJC4 DPY19L3 EIF5 EPSTI1 ERBB2IP FAM117B FAM167A FKBP5 GLCCI1 HDAC4 ID3 IFI16 JUN KIAA0182 KIAA0319L KLHDC4 LAX1 LCORL LNPEP LOC253039 LRRC8D MALT1 MAN2A1 MAP4K1 MIB1 NDUFB2 NFATC1 NFATC2IP NIN NR3C1 NUCB2 OMA1 PDCD1 PLAG1 PPP1CC PPP2R2A PTPN2 RASA1 RBM38 RGS1 RGS3 SERTAD2 SFI1 SH3TC1 SLC46A3 …	AACS ABCG1 APBB1IP ARID1B BCL7B BCL9L C2CD2 CAMSAP1 CASD1 CAV1 CBX4 CD27 CEPT1 CIRBP CNIH3 CNOT6L COBLL1 CSK CXCR5 CXXC5 CYFIP2 DCP2 DGKA DIP2A FBLN7 FKBP5 GFOD1 HDAC4 HECW2 ICA1 ID3 IFNAR2 IL16 JAZF1 JUN KAT2B KIAA0182 KLHDC4 LAX1 LDOC1L LHFP LNPEP LRRC8D LY9 MAN2A1 MED13L MGAT5 MSI2 MYST4 NCOA1 NDUFB2 NFATC1 NFATC2IP NR3C1 NR4A2 NUCB2 OMA1 PIK3C2A PLCL2 PLXND1 PPP1CC PPP1R16B QSOX2 RALGDS RGS1 …
GC_T_helper_up4x_Chtanova		0.00367223	BCL7B C2CD2 CD27 CXXC5 FKBP5 GLCCI1 HDAC4 ID3 JUN KIAA0182 NR3C1 PDCD1 SH3TC1 SLC46A3 SLC7A6 TOX2 TRIM8 TSC22D1	BCL7B BCL9L C2CD2 CAV1 CD27 CNIH3 CXCR5 CXXC5 FBLN7 FKBP5 GFOD1 HDAC4 ICA1 ID3 IL16 JAZF1 JUN KAT2B KIAA0182 LY9 MED13L MSI2 NCOA1 NR3C1 PLCL2 PLXND1 PPP1R16B SH3TC1 SLC7A6 SLC9A9 SMAD1 TOX2 TULP4 VAV3 WIPI1 XYLT1
Germinal_center_Bcell_DLBCL		0.0255252	CCNG2 GCET2 KATNAL1 MAN2C1 SAMD12 SFRS15 SMARCB1 SYVN1 VPREB3	CUX1 DTX1 ELOVL5 FAM102A GCET2 KATNAL1 KLHL6 MME PAG1 SAMD12 SFRS15 SMARCB1 SORL1 SYVN1
Glucose_starve_down	1.57247e-07	5.32788e-05	ADNP ATP2A2 ATP5J ATP6V0B AURKA BAZ1A CDC7 DEK DNAJA1 DPYSL2 E2F1 EIF2B4 EIF4H ESPL1 FUS FZR1 GORASP2 GTF2A2 H2AFV HNRNPR IFI16 KIF11 MAGED1 MKI67 MSH2 NFYB NUP98 OIP5 PDCD4 PICALM POLG RBBP4 RPA3 RPLP2 RRBP1 SFRS1 SFRS2 SH2B1 SLC25A5 SMC4 ST3GAL4 TNK2 TUSC2 WEE1 ZC3H3 ZFR	ADNP ATP2A2 ATP5J AURKA BAZ1A BFSP2 CDC7 DEK DNAJA1 E2F1 EIF4H ESPL1 FUS FZR1 GORASP2 GTF2A2 ID2 ITGB7 MAGED1 MKI67 MSH2 NFYB NUP98 PDCD4 PHB PICALM PICK1 RBBP4 RNF6 RRBP1 SFRS1 SFRS2 SLC25A5 SMC4 TNK2 TUSC2 XRCC5 ZC3H3
Glutamine_Glucose_starve_both_down	3.01909e-22	5.26018e-12	ACADVL ACIN1 ADA AK2 AMD1 AP4M1 ARF1 ARHGAP1 ATF5 ATP2A2 ATP2A3 ATP5G3 BCAP31 BCS1L BNIP3L BTK CALU CBLB CCT2 CD27 CDC25A CDT1 CENPF CIRBP COPB2 CSE1L CTDSP2 CYC1 DAP3 DNAJA1 DRAP1 EBNA1BP2 EIF2B4 EIF4G2 EMG1 FABP5 FAM98A FANCG FASN FKBP8 GM2A GORASP2 GOT2 GTF2A2 H2AFX HCCS HDHD1A HIST1H2BI HIST1H3H HLA-DPB1 HLA-DQA1 HMG20B HMMR HNRNPA3 HSP90AA1 HSP90B1 HSPA5 HSPA8 HSPE1 HYOU1 JAK1 JTB JUND LANCL…	ACADVL ACIN1 ADA AK2 ARF1 ARHGAP1 ATP2A2 ATP2A3 ATP5G3 BCS1L BNIP3L BRF1 BTK CADM1 CALCOCO1 CALU CBLB CCT2 CD27 CD48 CDC25A CDT1 CENPF CIRBP COPB2 CSE1L CTDSP2 CUX1 CYC1 CYTH1 DNAJA1 EBNA1BP2 EIF2B2 ERCC1 FABP5 GM2A GORASP2 GOT2 GTF2A2 HCCS HIST1H2BK HLA-DPB1 HLA-DQA1 HMG20B HMMR HNRNPA3 HSP90AA1 HSP90B1 HSPA5 HSPA8 HSPE1 HYOU1 ID2 IFNGR2 IL4R JAK1 LANCL1 LIMK2 LRWD1 LY86 MRPL12 NCAPD2 NUP98 P2RX…
Glutamine_starve_down	8.86309e-37	8.14145e-15	ACLY AK2 ALDOA ALG8 AMD1 ATP2A2 ATP5G3 BAZ1A BCAP31 BOP1 BTK BZW1 CAD CALR CAPRIN1 CCDC6 CCNB1 CCT2 CDC20 CDC25A COPS3 CSE1L CYC1 DHX15 DKC1 DLEU1 DNAJA1 EBNA1BP2 EIF1AX EIF2B4 EIF4A3 EIF4G2 EIF5 EMG1 FAM98A FASN FBL FDFT1 FKBP2 FUS GOLGA1 HN1L HNRNPA2B1 HNRNPAB HNRNPL HRAS HSP90AA1 HSP90B1 HSPA5 HSPA8 HSPE1 IFRD2 KHSRP KPNA2 LDHA LIMK2 LMNB1 MAK16 MAP3K11 MAPRE2 MAZ MED12 MED22 METTL1 MLF2 MRPL1…	ACLY ADAM19 AK2 ALDOA ALG8 ATP2A2 ATP5G3 BAZ1A BOP1 BTK CAD CAPRIN1 CCDC6 CCNB1 CCT2 CDC25A CEBPZ CELSR2 COPS3 CSE1L CYC1 DHX15 DKC1 DNAJA1 EBNA1BP2 EIF1AX EIF4A3 FBL FKBP2 FUS GOLGA1 HN1L HNRNPL HSP90AA1 HSP90B1 HSPA5 HSPA8 HSPE1 IFRD2 KHSRP KPNA2 LIMK2 MAPRE2 MAZ METTL1 MRPL12 MRPL23 MTHFD1 NCL NDUFS6 NUDC NUP98 PA2G4 PCBP1 PDCD4 PFKP PFN1 PHB PICK1 PPIB PPIF PRDX4 PRMT1 PSMA6 PTPN6 RANGAP1 RBM…
Glutamine_starve_up	2.04332e-07	9.87116e-07	ABCB9 ACADVL ADA AIM1 ARID3A ARRB2 ASXL1 ATF4 ATF5 ATP5S BARD1 BIRC5 BNIP3L CARS CBFA2T3 CBLB CCNG2 CD27 CDC25C CEP350 CIRBP CTAGE5 CTDSP2 CUL4B CYTH2 DRAP1 EIF1 EIF3J GLB1 GSTZ1 HMGB2 HNRNPA3 HSF1 IARS IGBP1 ITPR2 KDELR1 LRP10 MTHFD2 NCF4 NCOR1 NR3C1 PCK2 PEX5 PPP3R1 RASA1 RASGRP2 RBCK1 SEC14L1 SERPINI1 SF4 SLC1A4 SLC1A5 SLC35E2 SLC43A1 SMARCB1 SMTN SPG11 STXBP2 TM9SF1 TMEM131 TOP2A TOP3B TOR1AI…	ACADVL ADA AIM1 ARID3A ARRB2 BARD1 BCKDHB BLK BNIP3L CADM1 CARS CBFA2T3 CBLB CD27 CDC25C CEP350 CIRBP CLASP1 CLASP2 CTAGE5 CTDSP2 CUL4B CUX1 CYTH1 CYTH2 DDIT4 EIF1 EIF3J ENOSF1 HMGB2 HNRNPA3 HSF1 IARS IGBP1 IL4R ITPR2 KDELR1 LRP10 LY86 MAP2K3 MED13L MTHFD2 NANS NCF4 NFIC NR3C1 PCK2 PEX5 PLCL2 PTPRT RASGRP2 RBCK1 SLC16A3 SLC1A4 SLC43A1 SLC7A5 SLIT1 SMARCB1 SMTN SPG11 STXBP2 TOP2A TOP3B TRIO TRRAP …
Glycolysis	0.000540099		ENO1 GAPDH LDHA PGAM1 TPI1	GAPDH TPI1
HIF1alpha_1.5x_Up		0.0234067	ACVR1B BNIP3L CXCR4 FAM128B GBE1 LEPR MXI1 NDRG1 PGM1 PPP1R13L RGS3 RNASE4 RPS6KA2 SIRT3 SPAG4 VEGFA ZBTB1 ZHX2	ACVR1B ARL4C ATXN1 BNIP3L CHSY1 CXCR4 DDIT4 FAM128B GADD45B LEPR MXI1 NARF NDRG1 NEDD9 NINJ2 NPAS2 PGM1 PLCG2 RGS3 RPS6KA2 SIRT3 SMAD6 SORBS2 SOX4 SPAG4 TAPBPL TNFAIP3 TSGA10 VEGFA WASF2 ZHX2
HIF1alpha_1.5x_down	4.1974e-41	9.55991e-15	ASF1B BARD1 BOP1 BRCA1 CAD CCDC99 CCNE1 CCNE2 CD3EAP CDC6 CDC7 CENPN CHAF1A CIAO1 CSE1L DBF4 DDX11 DHFR DKC1 DLAT DNA2 DNAJC9 EBNA1BP2 ELK1 ELOVL6 EMG1 ERCC6L EXO1 EXOSC8 FANCG FANCI FASN FBXO5 FEN1 FUS GINS1 GINS2 GMNN H2AFX HEATR3 HIST1H3D HJURP HMGA1 HNRNPD HNRNPU HNRPDL ILF3 IPO4 KIAA0101 LETM1 LRP8 MAZ MCFD2 MCM2 MCM4 MCM5 MCM6 MELK METTL2B MNS1 MRPL40 MRPS12 MRTO4 MTERFD1 MTHFD1 NLE1 NOLC1 …	BARD1 BOP1 BRCA1 CAD CCDC99 CCNE2 CDC6 CDC7 CHAF1A CSE1L DDX11 DKC1 DLEU2 DNA2 DNAJC9 EBNA1BP2 ELK1 ELOVL6 FANCI FBXO5 FUS GINS2 HJURP HMGA1 HNRNPD KIAA0101 LETM1 LMNB2 LRP8 MAP2K3 MAZ MCFD2 MCM2 MCM5 MCM6 MELK METTL2B MNS1 MTERFD1 MTHFD1 NLE1 NUP98 NUSAP1 OAZ1 PA2G4 PHB POLA2 POLR2L POLR3K PPARD PPIF PRMT7 PSMC3IP RANBP1 RFC2 RFC3 RFC5 RPL39L RRM2 SFRS2 SHCBP1 SLC19A1 TIPIN TRIP13 TTLL4 TUBG1 UC…
HIF1alpha_2x_down	2.19026e-14	4.19646e-09	BRCA1 CCNE2 CDC6 CHAF1A DDX11 ELK1 ELOVL6 EMG1 ERCC6L EXO1 FBXO5 GINS1 GINS2 HIST1H3D LRP8 MCM2 MCM4 MCM5 MRTO4 NUP98 POLR3K PRMT7 RRM2 SKP2 SLC19A1 TIPIN TTLL4	BRCA1 CCNE2 CDC6 CHAF1A DDX11 DLEU2 ELK1 ELOVL6 FBXO5 GINS2 LRP8 MCM2 MCM5 NUP98 POLR3K PPARD PRMT7 RRM2 SLC19A1 TIPIN TTLL4
Hematopoietic_Node1658	4.45859e-06	4.66739e-11	ARPC1B ATP2A3 BTN3A2 BTN3A3 CNPY3 CORO1A CXCR4 CYBA DOCK2 GIT2 GMFG IL10RA ISG20 LAT2 LIMD2 LRCH4 MAN2B1 MAP4K1 PFN1 PIK3CD PSMB10 PSMB8 RAC2 RASGRP2 TCIRG1 TGFB1 TREX1 UCP2	ADRBK1 ALOX5AP ARHGDIB ARPC1B ATP2A3 BTN3A2 CD48 CNPY3 CORO1A COTL1 CXCR4 CYBA DOCK2 DPEP2 ELF1 ELF4 GIT2 IKZF1 ISG20 LAT2 LIMD2 LRCH4 MAN2B1 MSN PFN1 PIK3CD PLEK PSMB8 PTPN6 RAC2 RASGRP2 SELL SEPT6 SP100 TCIRG1
Hematopoietic_Node1659	0.00378436	0.0389488	BAX CD2BP2 DAP3 ILF3 NUP93 PRR14 RRP7A SNX17	BAX CD2BP2 NUP93 PRR14 RRP7A SNX17
IFN_PMBC_2x_Up	0.0335825	0.00822977	APOBEC3G CASP7 DNAJA1 DRAP1 FCHSD2 IFI16 IFIT5 IRF2 IRS1 ISG20 MYD88 OAS2 PRDX4 PRKD2 PSMB8 PSMB9 PSME2 RABGAP1L RBCK1 RGS1 SOCS1 STAT1 TAP1 TARBP1 TMEM187 TNK2 TREX1 TRIM14	ADAM19 AFF1 AIM2 APOBEC3G BAK1 CASP7 CD38 DNAJA1 FCHSD2 IFI6 IFIT5 IRF2 IRS1 ISG20 LAG3 OAS2 PALM2-AKAP2 PRDX4 PSMB8 RABGAP1L RBCK1 RGS1 SP100 STAT1 TARBP1 TMEM187 TNK2 TRIM14 TYMP
IL10_OCILy3_Up		0.00473612	CCND3 CIITA HIF1A HLA-E JUN JUNB NLRC5 PHLDA1 PRDM1 PSMB9 PTPN1 PTPN2 SOCS2 SOD2 ST6GAL1 TAP1 TLR10	ADRBK1 AIM2 BCL9L CCND3 CDKN1A CIITA CISH CRADD CXCR5 DMD FGF7 FLT1 FUT8 HIF1A ID2 JUN KLHL6 MARCH1 MEF2D NLRC5 PRKCB PTPN1 SAMSN1 SOCS2 ST8SIA4 TLR10 TNFAIP3
IL6_Ly10_Up_all		0.0440644	DUSP2 IRF4 JUN JUNB KLF10 PTPN1 SOCS1 SOCS2 ZBTB20	CISH CXCR5 DUSP2 ID2 IRF4 JUN KLF10 PTPN1 SOCS2 ZBTB20
IL6_Ly10_Up_group1		0.0191472	DUSP2 IRF4 JUN JUNB KLF10 SOCS1 SOCS2	CISH CXCR5 DUSP2 ID2 IRF4 JUN KLF10 SOCS2
IRF4_myeloma_induced_Agilent	0.00028113	2.51118e-05	ABHD10 BSPRY CDT1 CHRAC1 DNAJB5 ERLIN1 FDFT1 FKBP11 FZD2 GAA GFPT1 GNG7 HSPB1 ISG20 KLF2 LDHA LDLR MDC1 MMAB MOCOS MVK MXI1 NDRG1 NR4A1 PELI3 PGK1 PMS2L3 SCD SIRT3 SKP2 SLC37A4 SPATS2 SSR1 ST6GAL1 TAGLN2 TCOF1 TERT TMEM38A TNFRSF17 TXNDC5 VEGFA WHSC1 XPOT YARS ZNF37A	ABHD10 AGPAT2 BSPRY CAV1 CDT1 CHRAC1 DIXDC1 EML2 FAM100B FKBP11 GAA GFOD1 GLDC GNG7 GTF2IRD1 HK2 HSPB1 ISG20 KLF2 LDLR MDC1 MMAB MOCOS MXI1 NDRG1 PALM2-AKAP2 PELI3 PMS2L3 PTPN6 SIRT3 SLAMF7 SLC37A4 SLC38A2 SSR1 STX18 TAGLN2 TCOF1 TERT TMEM38A TNFRSF17 TXNDC5 VDAC1 VEGFA WWC3 XPOT ZNF37A
IRF4_myeloma_induced_Lymphochip	6.87345e-09	3.34331e-09	ATF4 AURKA CENPF DEPDC1 DNAJB9 E2F5 HMGB1 HMMR HSP90AA1 HSP90B1 IFI16 IFNAR1 IRF4 ITGA4 ITPR2 KRAS KTN1 MAN2A1 MKI67 NR4A1 OSBPL8 PAICS PDCD10 PDIA4 PPP1R2 PRDM1 PRPF40A RAD21 ROCK1 SCD SEPT7 SP3 ST3GAL1 SUB1 TBC1D14 TCERG1 TNFRSF17 TRAM1 UAP1 UBE2J1 USP9X WHSC1	AURKA BNIP2 CD38 CDK6 CEBPZ CENPF DEPDC1 DNAJB9 E2F5 HMGB1 HMMR HSP90AA1 HSP90B1 IFNAR1 IRF4 ITGA4 ITGB7 ITPR2 KRAS KTN1 MAN2A1 MKI67 OSBPL8 PDIA4 PPP1R2 PRPF4B PTPN6 RAD21 ROCK1 SEPT7 SLAMF7 SP3 ST3GAL1 STRBP SUB1 TBC1D14 TCERG1 TNFAIP3 TNFRSF17 TRAM1 UAP1
IRF4_myeloma_induced_all	1.07513e-10	1.52064e-12	ABHD10 ATF4 AURKA BSPRY CDT1 CENPF CHRAC1 DEPDC1 DNAJB5 DNAJB9 E2F5 ERLIN1 FDFT1 FKBP11 FZD2 GAA GFPT1 GNG7 HMGB1 HMMR HSP90AA1 HSP90B1 HSPB1 IFI16 IFNAR1 IRF4 ISG20 ITGA4 ITPR2 KLF2 KRAS KTN1 LDHA LDLR MAN2A1 MDC1 MKI67 MMAB MOCOS MVK MXI1 NDRG1 NR4A1 OSBPL8 PAICS PDCD10 PDIA4 PELI3 PGK1 PMS2L3 PPP1R2 PRDM1 PRPF40A RAD21 ROCK1 SCD SEPT7 SIRT3 SKP2 SLC37A4 SP3 SPATS2 SSR1 ST3GAL1 ST6GAL1 SUB1 TAG…	ABHD10 AGPAT2 AURKA BNIP2 BSPRY CAV1 CD38 CDK6 CDT1 CEBPZ CENPF CHRAC1 DEPDC1 DIXDC1 DNAJB9 E2F5 EML2 FAM100B FKBP11 GAA GFOD1 GLDC GNG7 GTF2IRD1 HK2 HMGB1 HMMR HSP90AA1 HSP90B1 HSPB1 IFNAR1 IRF4 ISG20 ITGA4 ITGB7 ITPR2 KLF2 KRAS KTN1 LDLR MAN2A1 MDC1 MKI67 MMAB MOCOS MXI1 NDRG1 OSBPL8 PALM2-AKAP2 PDIA4 PELI3 PMS2L3 PPP1R2 PRPF4B PTPN6 RAD21 ROCK1 SEPT7 SIRT3 SLAMF7 SLC37A4 SLC38A2 SP3 SSR1 ST3GA…
IRF4_myeloma_induced_direct	0.0151907	0.00288792	E2F5 GFPT1 IRF4 ISG20 MAN2A1 PRDM1 SCD SLC37A4 SUB1 TNFRSF17 UAP1	CDK6 E2F5 IRF4 ISG20 ITGB7 MAN2A1 SLAMF7 SLC37A4 SUB1 TNFAIP3 TNFRSF17 UAP1
KLF2_induced		0.0216652	CDC25B CDKN2D H2AFV HLA-B HLA-E ID3 IL10RA KLF2 NBEAL2 OSBPL8 PLP2 S1PR1 SETD1B SLC12A7 TAP1 TGFB1 TINF2 TMC6 TMSB10 WDR18	CDC25B ELF4 FAM53B FAM65B FLNA GLG1 ID3 KLF2 KRCC1 OSBPL8 PLP2 PRKCB RUNX1 SETD1B SIT1 SP100 TIAM1 TMC6 TMSB10 TPST2 UBXN11 WDR18
KLF2_repressed	0.00214262	0.0493889	ACAT1 APRT BCL7B CEP70 CHST11 CLPB DARS DCTD EGR1 FDFT1 IFI16 IGLL1 ITGA4 JUN KIAA0182 MCCC1 MSH5 MSH6 NUP88 P2RX5 PPAT SCD SHQ1 SKP2 TNFRSF21 TRIM14 UAP1	ABCG1 ACAT1 AEBP1 APRT BCL7B CHST11 DCTD DNTT EGR1 ITGA4 JUN KIAA0182 MCCC1 MSH6 P2RX5 PPAT PRKCA TFDP2 TRIM14 UAP1 UBE2V1
KRAS_Down	0.00414584	0.00222848	CALU EBNA1BP2 EIF5 ENTPD6 H3F3B KRAS LBR LRP8 MLX MRPS12 NUP62CL ODC1 PHLDA1 POLR3K PTMA RAB40C RRM2 SSRP1	APP ARL4C CALU EBNA1BP2 ENTPD6 ETV5 H3F3B KRAS LBR LRP8 MLX NUP62CL POLR3K PTMA RAB40C RNF6 RRM2 SSRP1
Leucine_starve_down	2.76723e-16	7.68336e-08	ACOT7 ALDOA ALG8 AMD1 AURKA CAD CALR CCNB1 CCT2 CDC20 COPB2 CSE1L CYC1 DNAJA1 DYNLL1 EIF2B4 EIF4G2 EIF5 FAM98A FASN FKBP2 HSP90AA1 HSP90B1 HSPA5 HSPA8 HSPE1 ILF3 KPNA2 LDHA LIMK2 LRWD1 MCM4 MLF2 MLX MRPL12 MRPS12 MTHFD1 NCL NME2 NMT1 NUP98 NUTF2 PAPOLA PDCD4 PDIA4 PGAM1 PGK1 POLG PPIB PRMT1 PRPF40A PTBP1 RBM14 RCC1 RNF126 SCD SFRS2 SLC29A1 SRM TCP1 TGFB1 TK1 TMEM109 TRIP13 UBC WDR1 ZC3H3	ALDOA ALG8 AURKA CAD CCNB1 CCT2 CEBPZ COPB2 CSE1L CYC1 DNAJA1 FKBP2 HSP90AA1 HSP90B1 HSPA5 HSPA8 HSPE1 KPNA2 LIMK2 LRWD1 MAP2K3 MLX MRPL12 MTHFD1 NCL NME2 NUP98 NUTF2 PAPOLA PDCD4 PDIA4 PPIB PRMT1 PSMD14 PTPN6 RASSF2 RBM14 RCC1 RNF126 SFRS2 SLC29A1 TCP1 TK1 TMEM109 TRIP13 UBC VDAC1 XRCC5 ZC3H3
Leucine_starve_up	6.66853e-05	0.00316149	AIM1 APOBEC3G ARID3A ATF4 ATF5 ATXN2L BNIP3L CARS CD27 CIRBP CTAGE5 EIF1 HMGA1 HNRNPA3 IRF2 ISG20 KHSRP KIAA0922 KIF2C LCK MTHFD2 MTX1 NCOR1 PCK2 PDCD4 SLC1A4 SLC1A5 SLC43A1 SSR2 ST3GAL4 ST6GAL1 TMEM131 XPOT YARS	AIM1 APOBEC3G ARID3A BNIP3L CARS CD27 CDKN1A CIRBP CTAGE5 CUX1 CYTH1 EIF1 HMGA1 HNRNPA3 IRF2 ISG20 ITGB3BP KHSRP KIAA0922 KIF2C MTHFD2 PCK2 PDCD4 PICK1 SLC1A4 SLC43A1 SSR2 XPOT
MCL_proliferation_survival	4.77046e-08	0.000245909	ASPM CDC20 CDKN3 CENPF HMGB2 MCM2 NEIL3 PCNA PIF1 RAN TK1 TOP2A TUBA1B	CDKN3 CENPF HMGB2 MCM2 PCNA PIF1 TK1 TOP2A TUBA1B
MHC_classII_DLBCL	0.000758274	0.0309134	CD74 HLA-DMB HLA-DPA1 HLA-DPB1 HLA-DQA1 HLA-DRA	HLA-DPB1 HLA-DQA1 HLA-DRA HLA-DRB1
MHC_classII_DLBCL_survival	0.0370781	0.0281637	HLA-DPA1 HLA-DQA1 HLA-DRA	HLA-DQA1 HLA-DRA HLA-DRB1
Myc_ChIP_PET_2plus	5.9897e-16	3.89834e-39	ABCB9 ABCD3 ABHD11 ABL1 ACACA ACADM ACAT1 ACOT7 ADAM15 ADAM29 ADCK1 ADIPOR2 ADPRHL1 AGTPBP1 AK2 AKAP11 AKAP2 ALDH3B1 ALG13 ALG8 ALOX5 AMMECR1 ANAPC13 ANKMY1 ANKRD13D ANLN ANP32B APEH APRT ARFGAP2 ARID1A ARID3A ARIH2 ARL5B ARL6IP6 ARPC1B ARPC5L ASXL2 ATAD2 ATAD5 ATF4 ATG16L2 ATP2A2 ATP5F1 ATP5S ATP6V1E1 ATXN10 AURKA B9D2 BCL11A BIRC6 BLCAP BNIP3L BRD1 BRMS1L BTF3L4 BUB1 BUB1B BUB3 C2CD2 CAND1 CAPN…	ABHD11 ABLIM2 ABR ACAT1 ACOXL ADAM15 ADAM29 ADARB1 ADARB2 ADCK1 ADIPOR2 ADPRHL1 ADRBK1 AFF2 AGPAT2 AGTPBP1 AK2 AKAP11 AKAP12 AKAP2 AKAP4 ALDH3B1 ALG13 ALG8 ALOX5 AMMECR1 ANKRD11 ANKRD16 ANKRD46 ANLN ANP32B ANXA4 APBB1IP APBB2 APP APRT ARHGAP24 ARHGAP26 ARID1A ARID3A ARIH2 ARL4C ARL5B ARL6IP6 ARL8B ARPC1B ARPC5L ARSB ARSG ASXL2 ATG16L2 ATP2A2 ATP6V1C1 ATP6V1E1 ATP8A2 ATP8B1 ATXN10 AURKA AUTS2 B4GA…
Myc_ChIP_PET_3plus	5.14925e-08	2.70169e-12	ADAM29 AKAP2 ALDH3B1 ANLN ANP32B ATP2A2 ATP6V1E1 BCL11A BUB1 CAPRIN1 CCDC109B CCDC88C CDKN2AIP COMTD1 DKC1 DNAJA1 DNAJB11 DPY19L3 EFCAB4B EIF5 ESR2 ETNK1 ETS2 FAM120A FKBP5 FLJ37453 FPGS GABPB1 GAPVD1 GBE1 GEMIN4 GLCCI1 GRPEL1 HAGHL HMGB1 HYOU1 IARS ID3 IFI16 JUN KCNQ5 KIAA0528 KIAA0895 KIAA0922 KLF16 KNTC1 LCORL LDHA LFNG LIN54 LNPEP LOC100125556 LOC388796 MELK METTL8 MFNG MFSD3 MTA1 MTX2 MXD3 M…	ABR ADAM29 AKAP2 ALDH3B1 ANKRD16 ANKRD46 ANLN ANP32B ARL4C ATP2A2 ATP6V1E1 BCL11A BCL7C BDKRB2 BUB1 CAPRIN1 CCDC109B CCDC88C CD247 CD28 CDKN2AIP COMTD1 CTNNA2 DKC1 DLG2 DNAJA1 DNAJB11 EFCAB4B EGR4 EML2 ETNK1 ETS2 EVL FKBP5 FLJ37453 FPGS GABPB1 GAPVD1 GEMIN4 GLDC GRIK3 GRPEL1 HAGHL HMGB1 HYOU1 IARS ID3 JUN KCNJ6 KCNQ5 KIAA0528 KIAA0922 KLF16 KNTC1 LIN54 LNPEP LOC100125556 LTBP4 MDS2 MELK METTL8 MF…
Myc_ChIP_PET_Expr_Down	2.06033e-06	2.44751e-09	AKAP11 ALOX5 ANKRD13D ARPC1B ATG16L2 BNIP3L CBFA2T3 CCM2 CDKN2D DIP2A ERBB2IP ESR2 FAM129A FGD2 GLCCI1 GNAS HERPUD1 HLA-E IRF2 IRF5 ITGA4 ITPR2 JUN KCNN3 LASP1 LNPEP MAPK1 MLLT3 MYO1C MYO1G NAGK NCOA2 NFATC1 NFKBID NR3C1 NR4A1 ODF2L PACS1 PCSK7 PDE7A PEA15 PIK3CD PPM1A PRKCE PRKD2 PTPN9 RASGRP2 RFTN1 RGS1 RGS19 ROR1 S100PBP SEC14L1 SMAP2 SOCS1 STARD10 SYK TBC1D10C TCIRG1 TRIM2 TRIM8 UCP2 ZNF274	AKAP11 ALOX5 APBB1IP ARL4C ARPC1B ATG16L2 ATP8B1 BLK BNIP3L CALCOCO1 CBFA2T3 CCM2 DIP2A DOCK10 ENTPD1 ETV6 EVL FNBP1 GNAS HERPUD1 HIP1 IER2 IKZF1 IL4R IRF2 IRF5 ITGA4 ITPR2 JUN KCNN3 KIAA0247 LASP1 LNPEP MED13L MYO1C NAGK NCOA2 NFATC1 NFKBID NR3C1 ODF2L PACS1 PAX5 PEA15 PIK3CD PLEK PPM1A PREX1 PTK2B RAD51L1 RASGRP2 RASSF2 RFTN1 RGS1 RGS19 ROR1 S100PBP SEMA4D SMAP2 SNAI3 SORL1 STRBP SYK TBC1D10C T…
Myc_ChIP_PET_Expr_Up	6.91309e-29	1.03866e-19	ABCD3 ACACA ACAT1 ACOT7 AK2 AMMECR1 ANP32B APEH APRT ARIH2 ARL6IP6 ARPC5L ATP2A2 BUB1 BUB1B BUB3 CAND1 CAPRIN1 CCNE2 CCNJ CDC6 CENPK CENPM CEP76 CLN6 COMTD1 CSDA CSE1L DDX31 DHX15 DKC1 EIF3J EMG1 ENO1 EXO1 FAIM FBXO31 FKBP11 GALNT2 GCN1L1 GEMIN4 GEMIN5 GGCT GGH GLUD1 GOLIM4 GRPEL1 GTF3C6 HMGA1 HMGB1 HNRNPA3 HNRNPAB HNRNPF HNRNPR HNRNPU HS2ST1 HSPA5 IARS IFRD2 IPO7 KCMF1 KIAA0090 L2HGDH LASS2 LDHA…	ACAT1 AK2 AMMECR1 ANP32B APP APRT ARIH2 ARL6IP6 ARPC5L ATP2A2 BUB1 BUB1B BUB3 CAND1 CAPRIN1 CCNE2 CCNJ CDC6 CENPK CENPM CLN6 CLPTM1L COMTD1 CSDA CSE1L DHX15 DKC1 DNAJC12 DNMT3B EIF3J FAIM FBXO31 FKBP11 GALNT2 GCN1L1 GEMIN4 GEMIN5 GGCT GLDC GLRX3 GRPEL1 GTF3C6 HMGA1 HMGB1 HNRNPA3 HNRNPF HS2ST1 HSPA5 IARS IFRD2 IPO7 LASS2 LEF1 LRRC59 LSM11 MAZ MCM3 METAP1 METTL11A METTL8 MFNG MRPL1 MRPL23 MRPL37 MR…
Myc_RNAi_OCILy3	2.499e-05	0.000130812	ADSS AKAP10 DEPDC1 DHX15 DLEU1 ENO1 ETNK1 FBL HMGB1 HSP90B1 MFSD8 NOLC1 NPM1 PHB2 ROCK1 SCARB1 THOP1 TRAP1 TUBA1A WHSC1	ADSS AKAP10 DEPDC1 DHX15 ETNK1 FBL FBXO45 HMGB1 HSP90B1 MFSD8 NPM1 PHB2 ROCK1 SCARB1 SLC38A2 THOP1 TRAP1 TUBA1A
Myc_overexpression_1.5x_up	6.37078e-07		ATIC BOP1 CCDC78 CCDC86 DDX10 DDX28 DKC1 DUSP2 FAM100A FLAD1 GEMIN5 HSPD1 IPO4 METTL1 MRTO4 MYBBP1A NCL NLE1 NOLC1 PA2G4 PAICS PLD6 RCL1 RPP40 SCFD2 SFXN4 SLC19A1 SRM UBIAD1 XPO5	BOP1 DKC1 DUSP2 FLJ10661 GEMIN5 HK2 METTL1 MYBBP1A NCL NLE1 PA2G4 PHB PLD6 SFXN4 SLC19A1 TRMT1 XPO5
Myc_overexpression_2x_down		0.0389488	CDK2 HIST1H2AC RPL39 TUBA1A	AKAP12 CDK2 PC RPL39 SERPINB1 TUBA1A
Myc_overexpression_2x_up	0.00802163	0.0141107	CCDC78 DDX28 DKC1 DUSP2 GEMIN5 MYBBP1A NCL PLD6 RPP40 SLC19A1 UBIAD1	DKC1 DUSP2 FLJ10661 GEMIN5 HK2 MYBBP1A NCL PLD6 SLC19A1 TRMT1
Myeloma_CD-1_subgroup_down	0.0140614	0.0018036	CD46 CD59 CXXC5 DOK3 LAX1 NOTCH2NL PRKCD RAB3IP SLFN11 SMURF1 ST6GAL1 UCP2 UNC93B1	ADAM19 BCL2L1 CD46 CD59 CXXC5 FUT8 LAX1 NOTCH2NL PRKCD PRKD3 RAB3IP SCAMP5 TNS3 UNC93B1
Myeloma_CD-2_subgroup_down	0.00430767		AVEN BOP1 CHAC2 FABP5 FASN HMGA1 KTELC1 LDHA MFNG MRPS30 POLR2H POLR3G TXN TXNDC11	AVEN BOP1 FABP5 HK2 HMGA1 LATS2 MFNG TXN TXNDC11
Myeloma_LB_subgroup_down		0.0196816	CAP1 GTPBP1 HIF1A HIST1H3D IFIT5 PDE4DIP PSMB10 PTPRCAP STAT1	AKNA GTPBP1 HIF1A IFI6 IFIT5 MAN1C1 PARP8 PDE4DIP PTPRCAP SMAD1 STAT1 ZMIZ1
Myeloma_MF_subgroup_down		0.0443418	CHST11 CREB3L2 GLCCI1 KLHDC5 PTCH1 TNFAIP8 ZNF275	CHST11 CREB3L2 ENAH KLHDC5 MOBKL1A NRG3 PRKCA PTCH1 STRBP TNFAIP8 ZNF275
Myeloma_MS_subgroup_down	0.00114127	0.0196816	ANKRD49 DHPS GPX1 KIAA1826 LETMD1 MOBKL2A NMRAL1 PIF1 POLR1D RHOBTB3 RPS2 SEPT9 SLC35F2 TLR10 TMEM123	ARSG CHD2 CHD7 LETMD1 MOBKL2A PIF1 RPS2 SEPT9 SLC35F2 STK24 TLR10 TMEM123
Myeloma_PR_subgroup_up	1.27699e-14	1.09941e-06	ASPM AURKA BIRC5 BUB1B CCNB1 CCNB2 DEPDC1B DLGAP5 E2F8 EZH2 FANCI FOXM1 KIAA0101 KIF14 KPNA2 NEK2 NUSAP1 PRC1 RACGAP1 RFC4 RRM2 SLC19A1 SPC24 SPC25 TOP2A TPX2 TRIP13 TTK TYMS UBE2C	AURKA BUB1B CCNB1 DEPDC1B DLGAP5 FANCI FOXM1 KIAA0101 KPNA2 NEK2 NUSAP1 RACGAP1 RRM2 SLC19A1 SPC24 SPC25 TOP2A TRIP13 TTK UBE2C
Myeloma_TACI_low_plasmablast_gene	4.58487e-07	0.00165218	BARD1 CCT2 CEP152 CHEK1 DKC1 EBNA1BP2 EIF3G EZH2 GPR89A IARS KEAP1 KIAA1731 MCM2 MRPS12 NASP NDUFA13 NMT1 NUDCD2 PPP1R12A PRKDC PTPMT1 RACGAP1 RAN SGOL2 SLC16A1 SLC38A1 TYMS ZNF367	BARD1 CCT2 CEP152 CHEK1 CYP2R1 DKC1 EBNA1BP2 EIF3G GPR89A IARS KEAP1 KIAA1731 KLF13 MCM2 PPP1R12A PRKDC RACGAP1 SGOL2 SLC16A1 SLC38A1
NFkB_all_OCILy3_Ly10		8.55235e-05	CCDC76 DUSP2 IRF4 JUNB MARCKS NCL NFKB1 NFKBIA PIM1 RGS1 SOCS2 STAT1	BCL2L1 CCR7 CD83 CEP110 DUSP2 FAM65B GADD45B ID2 IRF4 LITAF LOC283663 LYN MARCKS NCL NFKB1 PLEK RGS1 SELL SOCS2 STAT1 TNFAIP3
NFkB_bothOCILy3andLy10		0.000373171	DUSP2 IRF4 MARCKS NCL NFKB1 NFKBIA PIM1	BCL2L1 CCR7 CD83 CEP110 DUSP2 FAM65B GADD45B ID2 IRF4 LOC283663 MARCKS NCL NFKB1 TNFAIP3
Notch_T-ALL_down_Palomero		0.0482147	EDEM1 GM2A HIST1H2AK NDRG1 ZWINT	GM2A HIST1H2AK KIAA0391 NDRG1 ZWINT
Notch_T-ALL_up_Palomero	8.43923e-08	6.77177e-05	AARSD1 CSDA DDX28 DDX56 EMG1 FYCO1 HDAC4 IFRD2 ITPR2 KPNB1 MRPL24 MRPL4 MRTO4 POLR3E PPAT PWP1 SERBP1 SHQ1 SLC25A19 SNHG12 SNX5 TIMM13	CSDA FYCO1 HDAC4 IFRD2 ITPR2 MRPL24 MRPL4 MTMR4 PHB POLR3E PPAT PWP1 SERBP1 SLC25A19 SNX5 SRPRB TIMM13
Notch_T-ALL_up_Weng	0.000183071	0.000892466	B2M CNBP CSDA CTAGE5 FABP5 FKBP5 IFI16 LDHA PGK1 POLD1 PRMT1 PTCRA PTGES3 SSRP1 TK1 TMEM131 TPI1 VARS	B2M CNBP CSDA CTAGE5 DTX1 FABP5 FKBP5 ID2 PKP4 POLD1 PRMT1 PTGES3 PTP4A3 SSRP1 TK1 TPI1
PGC-1alpha_overepxression_up	0.0447821		ATP5J COX5B CYC1 NDUFA13 NDUFA8 NDUFC1 NDUFS3 UQCRC1	ATP5J ATP5O COX5B CYC1 NDUFA8 NDUFC1
PMBL_HL_high		0.00888033	CD58 CD59 JUNB NCOA2 NFKBIA NUP62 STAT1	AIM2 CD58 CD59 CDKN1A HOMER2 IFI6 NCOA1 NCOA2 NUP62 PARP10 SAMSN1 SLAMF1 SMAD1 ST8SIA4 STAT1 TNFAIP3 ZBTB38
Pan_B_U133plus		6.76635e-06	ALOX5 BCL11A CBFA2T3 CIITA E2F5 EBF1 ELL3 FCRLA GNG7 LOC91316 PLEKHG1 SPIB TCF4 TLR10 TNFRSF17 VPREB3	ALOX5 APBB2 BCL11A BLK CBFA2T3 CD79B CIITA CLLU1 COBLL1 COL9A3 CXCR5 DTX1 E2F5 EBF1 ELL3 FAM129C FCRLA GNG7 PAX5 PKIG PLEKHG1 QSOX2 SPIB TLR10 TNFRSF17 UGT8 WASF1
Plasma_cell_gt_mature_Bcell		0.00367207	CD59 COX15 GFI1 PRDM1 PRDX4 RGS1 SLC1A4 SSR3	ABCG2 CD38 CD59 ETV5 GFI1 PRDX4 RGS1 SLAMF7 SLC1A4 SSR3 TNFAIP3 VDR
Proliferation_DLBCL	2.57479e-77	1.53561e-34	ACO2 ACTB ACTL6A ACY1 ADSS AIFM1 AK2 AKAP10 ANP32A APRT ARHGAP11A ARHGAP19 ARL6IP1 ASPM ATF4 ATIC ATP5J ATP6V0B AUP1 AURKA AURKB BIRC5 BRCA1 BTK BUB1 BUB3 BZW1 CAD CALR CAND1 CCDC86 CCNB1 CCNE1 CDC20 CDC25C CDC7 CDCA2 CDK2 CDK7 CDK9 CDKN3 CDT1 CENPA CENPE CENPF CENPN CEPT1 CHAF1A CHEK1 CKS2 CLINT1 CLK3 CMPK1 CS CSE1L CSNK2A1 CTNNB1 DAP3 DARS DCK DCLRE1C DHFR DLEU1 DNA2 DNMT1 DTL DTYMK DUT E2F3 EE…	ACTG1 ACTL6A ADARB1 ADSS AK2 AKAP10 AKT1 ANP32A APRT ARHGAP19 ARL6IP1 ATP5J ATP5O AURKA AURKB BNIP2 BRCA1 BRI3 BTK BUB1 BUB3 CAD CAND1 CCNB1 CDC25C CDC7 CDK2 CDK7 CDK9 CDKN3 CDT1 CEBPZ CENPA CENPE CENPF CEPT1 CHAF1A CHEK1 CLINT1 CLK3 CMPK1 CS CSE1L CSNK2A1 DAD1 DCK DCLRE1C DMXL1 DNA2 DNMT1 DR1 DTL DTX1 DTYMK DUT EEF1A1 EEF1D EIF1AX EIF4E ELK1 ELOVL5 ERCC1 ESCO2 ETNK1 F2 FAM136A FBL GAPDH GLRX3 GO…
Proliferation_Node1542	0.000161375	0.000370641	COX5A CTBP1 DNMT1 LSM7 MRPS12 NDUFB7 NDUFC1 POLR2J3 PPP1CA PRMT1 SDF4 U2AF1 UQCRC1	AKT1 COX5A CTBP1 DNMT1 NDUFB7 NDUFC1 POLR2J3 PPP1CA PRMT1 SDF4 SMARCA4 U2AF1
Proliferation_Node1606	2.13231e-07	0.0408087	APRT GLTSCR2 GNG5 HNRNPAB HNRNPF OXA1L P4HB PABPC1 PDIA3 PLP2 PPIB PTBP1 RPL8 RPN2 RPS2 RPS5 SEC61A1 SERP1 TAGLN2	APRT HNRNPF P4HB PDIA3 PLP2 PPIB RPL8 RPS2 SERP1 TAGLN2
Proliferation_Node1618	2.27129e-33	4.25195e-16	ANP32B ASPM BIRC5 BUB1B CCNB1 CCNB2 CDC20 CDCA3 CDCA8 CDKN3 CENPF CENPM CKS2 DTL ESPL1 EZH2 FANCI FOXM1 GINS2 H2AFZ HJURP HMGA1 HMGB2 HMMR KIAA0101 KPNA2 LBR MCM2 MCM4 MCM5 MCM7 MELK MLF1IP NCAPG NCAPH NUP62 NUSAP1 ODC1 PCNA PRC1 RANBP1 RRM2 SMC4 TACC3 TCF3 TOP2A TPX2 TYMS WHSC1	ANP32B BUB1B CCNB1 CDCA8 CDKN3 CENPF CENPM DTL ESPL1 FANCI FOXM1 GINS2 H2AFZ HJURP HMGA1 HMGB2 HMMR KIAA0101 KPNA2 LBR MCM2 MCM5 MCM7 MELK MLF1IP NCAPG NUP62 NUSAP1 PCNA RANBP1 RRM2 SMC4 TCF3 TOP2A
Proliferation_Node1640	1.46342e-07	0.000697735	BUB3 CBX3 CSE1L DARS DDX50 DEK DHX15 EIF3A EXOSC8 HAT1 HMGB1 HMGN1 HSP90AA1 MBD4 MTHFD2 NASP NPM1 PNN RAN ROCK1 SERBP1 SNRPD3 THUMPD1 UBXN4	BUB3 CBX3 CSE1L DDX50 DEK DHX15 EIF3A HAT1 HMGB1 HMGN1 HSP90AA1 MTHFD2 NPM1 PNN ROCK1 SERBP1 UBXN4
Quiescence_heme_all	8.72609e-06	2.00431e-09	ARMC5 ATP2A3 B2M BCAP31 CAP1 CEP350 CMTM7 CNOT8 CREBL2 CYBA CYP20A1 DAZAP2 DCLRE1C EIF5 EP300 FASTK GIT2 GMEB1 GMFG GPSM3 H3F3B HLA-E HNRNPAB IKBKB IL10RA JUN KIAA1033 KLF2 KTELC1 LOC647121 MAPRE2 MAX MED29 MGA NAAA OSBPL8 PCBP2 PDLIM2 PNRC1 RAC2 RBM4 SETX SFRS2IP SLTM SNX17 SNX6 SSR2 SYTL1 TCIRG1 TGFBR2 TLE4 TMSB10 TNFAIP8 TNK2 TOR1AIP1 TTC15 UBC VAMP2 VAV1 VRK3 YWHAB YY1AP1 ZNF688	AKNA ARL4C ATP2A3 B2M CEP350 CMTM7 CYBA CYP20A1 DAZAP2 DCLRE1C DPEP2 EHBP1L1 FAM65B FASTK FLNA GIT2 GLG1 GMEB1 H3F3B IFNAR2 IKBKB JMJD1C JUN KIAA1033 KLF13 KLF2 LOC728855 MAPRE2 MAX MED29 MGA NAAA NCOA1 NR4A2 OSBPL8 PCBP2 PDE4B PDLIM2 PLCL2 PNRC1 PREX1 PRKCB PTPN6 RAC2 RASSF5 SELL SETX SFRS2IP SLC39A13 SNAP23 SNX17 SNX6 SSR2 SYTL1 TAPBPL TCIRG1 TGFBR2 TMSB10 TNFAIP8 TNK2 TTC15 UBC VAMP2 VAV1 VPS3…
Quiescence_heme_cluster1	0.00147296	3.05293e-08	B2M BCAP31 CAP1 CMTM7 CYBA DAZAP2 GIT2 GMFG GPSM3 H3F3B HLA-E IKBKB IL10RA JUN KLF2 LOC647121 MAX NAAA PDLIM2 PNRC1 RAC2 SETX SSR2 SYTL1 TCIRG1 TGFBR2 TLE4 TMSB10 TNFAIP8 TOR1AIP1 TTC15 UBC VAV1 YWHAB ZNF688	AKNA ARL4C B2M CMTM7 CYBA DAZAP2 DPEP2 FAM65B FLNA GIT2 GLG1 H3F3B IFNAR2 IKBKB JUN KLF2 LOC728855 MAX NAAA NCOA1 NR4A2 PDE4B PDLIM2 PNRC1 PREX1 PRKCB PTPN6 RAC2 RASSF5 SELL SETX SNAP23 SSR2 SYTL1 TAPBPL TCIRG1 TGFBR2 TMSB10 TNFAIP8 TTC15 UBC VAV1 WAS ZBTB38 ZNF688
Quiescence_heme_cluster2	0.00369979	0.0458924	ARMC5 ATP2A3 CEP350 CYP20A1 EIF5 EP300 FASTK GMEB1 HNRNPAB KTELC1 MAPRE2 MED29 MGA OSBPL8 RBM4 SFRS2IP SLTM SNX17 SNX6 TNK2 YY1AP1	ATP2A3 CEP350 CYP20A1 EHBP1L1 FASTK GMEB1 MAPRE2 MED29 MGA OSBPL8 SFRS2IP SLC39A13 SNX17 SNX6 TNK2 VPS37B YY1AP1
Resting_blood_B_cell_GNF		0.0123655	ADK AKAP2 EBF1 EZR FCRLA ID3 METTL8 P2RX5 P2RY10 PDLIM1 PPAPDC1B VPREB3	ADK AIM2 AKAP2 BLK CD79B CXCR5 EBF1 EZR FCRLA ID3 IL4R METTL8 MGC87042 P2RX5 P2RY10 PAX5 PDLIM1 PPAPDC1B STAG3
Resting_dendritic_cell_GNF		0.0127376	FLNB IRF4 KCTD5 PTCRA RGS1 RRBP1 SELS SLC2A8 TCF4 TNFRSF21 TOX2 TPM2 TRAF4 TXNDC11 ZFAT	ALOX5AP APP BIK COBL FLNB FLT3 HLA-DRB1 IRF4 KCTD5 KIAA1274 LGMN PROC RGS1 RRBP1 SELS SLC7A11 SOX4 ST14 TLR7 TOX2 TXNDC11
Reticulocyte_large	0.0238829	0.0255252	ACTB BNIP3L BSG CSDA E2F2 EIF1 GNAS GPX1 JUND MXI1 MYL6 OAZ1 PABPC1 PCBP2 PCGF5 PPM1A PRDX2 PRDX6 RNF10 TPT1 UBC UCP2	BCL2L1 BNIP3L BSG CSDA E2F2 EIF1 EIF2AK1 GNAS LGALS3 MAP2K3 MXI1 OAZ1 PCBP2 PCGF5 PIP4K2A PPM1A PRDX2 RNF10 SLC25A39 TPT1 UBC
STAT3high_ABC_DLBCL_subgroup	1.59636e-06	1.25755e-06	AURKA CAMK2D CHEK1 CSK CSNK2A1 EIF4E EIF5 ENO1 FTSJ1 GNB2 HIF1A JAK1 JUN JUNB LDHA MTHFD2 NDUFA8 NFATC4 NFKBIA OTUB1 PDIA3 PDIA4 PGAM1 PPP6C PRDX4 PRR11 PTPN1 SCARB1 SLC25A5 SOCS1 TUBG1	AURKA CAMK2D CHEK1 CSK CSNK2A1 EIF4E FUT8 GNB2 HIF1A ID2 JAK1 JUN MTHFD2 NDUFA8 NFATC4 PDIA3 PDIA4 PLEK PPP6C PRDX4 PRR11 PTPN1 REEP5 SCARB1 SLC25A5 SLC7A5 SOX4 TUBG1 UBE2V1 ZMIZ1
Serum_response_Fb_down	4.21103e-17	1.22981e-10	ACTL6A BRCA2 BRIP1 CDCA4 CDK2 CENPJ CENPN CHEK1 CORO1C DBF4 DCK DCLRE1B DHFR DLEU1 DUT EBNA1BP2 EIF4EBP1 ENO1 ERLIN1 EXOSC8 EZR FAM167A GGH H2AFZ HMGB1 HMGN2 HNRNPA2B1 HNRNPR ID3 IFRD2 IPO4 KIAA0090 MCM3 MCM7 MKKS MRPL12 MRPL37 MRTO4 MTHFD1 MYBL2 MYL6 NUDT1 NUDT15 NUP93 NUPL1 NUTF2 PA2G4 PCSK7 PDIA4 PFKP PFN1 PGM2 PLK4 PNN POLR3K PPAT RBM4 RNF138 RPN1 RPP40 SFRS2 SLC16A1 SNRPA SRM SSR3 TPI1 TPM2 …	ACTL6A BRIP1 CDCA4 CDK2 CENPJ CHEK1 CORO1C COTL1 CRAMP1L DCK DLEU2 DUT EBNA1BP2 EIF2AK1 EIF4EBP1 EZR GLRX3 H2AFZ HMGB1 HMGN2 ID2 ID3 IFRD2 IL7R LMNB2 MCM3 MCM7 MKKS MRPL12 MRPL37 MSN MTHFD1 MYBL2 NUDT1 NUP93 NUPL1 NUTF2 PA2G4 PDIA4 PFKP PFN1 PGM2 PLK4 PNN POLR3K PPAT PSMD14 RFC3 RNF138 SFRS2 SLC16A1 SNRPA SSR3 TPI1 TUBG1 UAP1 VDAC1 WDHD1 WDR77
Serum_response_Fb_up		0.00739645	ABHD14B ACIN1 ANKRD12 CCNG2 CCNL2 CD46 CTNS DPYSL2 ELL3 FYCO1 H2AFV IGBP1 LDLR LETMD1 MAN1A1 MBP MFGE8 MXI1 OSBPL8 PARP14 PBXIP1 PNRC1 PPIF REV3L RNF213 RRM2B SCD SLC25A36 SQRDL TMEM11 TNFAIP8 TP53INP1 TSC22D1 WTAP ZNF219 ZNF83	ABHD14B ACIN1 APP CALCOCO1 CD46 CDKN1A CPM CTNS ELL3 FADS2 FYCO1 GABARAPL1 GPR124 IGBP1 LDB1 LDLR LETMD1 LPIN1 MAGI2 MAN1A1 MBP MEF2D MXI1 OSBPL8 PBXIP1 PGCP PKIG PNRC1 PPIF RNF213 SLC25A36 SQRDL TFDP2 TMEM11 TNFAIP8 TP53INP1 WTAP ZNF219 ZNF83
TGFbeta_down_epithelial_large		0.0190592	CITED2 ID3 LDLR PTGER4 SERTAD2	CITED2 ID2 ID3 IL1B LDLR PTGER4 SERTAD2
TGFbeta_down_epithelial_small		0.0131084	CITED2 ID3 SERTAD2	CITED2 ID2 ID3 IL1B SERTAD2
TGFbeta_up_epithelial_large		0.0266354	ETS2 JUN JUNB PIM1 SLC19A2 SMURF1 ST3GAL1 VEGFA	ADAM19 CDKN1A ETS2 GADD45B JUN NEDD9 SLC19A2 SMAD7 SOX4 ST3GAL1 VDR VEGFA
Tcell_PIind_CalciumDefPtdown4x_Feske_Fig4	0.0139659		AIM1 CAMK2D GNAS H3F3B HIST1H2AC JUN MAPK1 N4BP2 PGAM1 PTPN1 QSOX1 RAN SCD SIAH2 STARD4 ZNF202	AIM1 CAMK2D CD48 CDK6 GNAS H3F3B JUN PTPN1 QSOX1 SIAH2 SLAMF1 STARD4 ZNF202
Tcell_PIrep4x_CsAindependent		0.0445769	ADA CDKN2C MCM2 MXD3	ADA CDKN2C MCM2 SUSD3
Tcell_PIrep4x_Feske_Fig4	0.0363419	0.00730358	ACTB HMGB2 LCK PCNA PDCD4 SKAP1 TMC8 TUBB	FAM102A HMGB2 IL16 PCNA PDCD4 SIT1 SKAP1 SP100 TUBB
Tcell_PIrep4x_Feske_Fig6	6.25286e-09	1.344e-09	ACTB ADA ATP2A3 BIRC5 CDC25B CDK2 CDKN2C CENPF CORO1A CYFIP2 HMGB2 HMMR LIMD2 MCM2 MCM7 MXD3 PCNA PLK1 PRKACB PSMB9 RFC4 SIPA1 ST6GAL1 TACC3 TOP2A TUBB UGP2	ACTG1 ADA ATP2A3 CDC25B CDK2 CDKN2C CENPF CISH CORO1A CYFIP2 FAM102A FYB HMGB2 HMMR IL16 IL32 ITGB7 LIMD2 MCM2 MCM7 PCNA PLK1 RGS9 SIPA1 TOP2A TUBB UGP2
Tcell_PIrep_CalciumDefPtup4x_Feske_Fig4	0.00430767	0.00928688	CXCR4 EML4 LCK PPP3CA RGS1 SQRDL STAT1 TMC8 TRERF1 ZFP36L2	CXCR4 EML4 FAM102A IL16 RGS1 SIT1 SQRDL STAT1 ZFP36L2
Tcell_cytokine_induced_PMBConly_Iinduced		0.00713941	ACTB ATF4 CXCR4 PARP14 PIM1 PTPN7 SOCS1 STAT1 VIM	ADAM19 APOBEC3F ARL4C CISH CXCR4 IL4R NDUFV2 PTPN7 SOS1 STAT1 TNFRSF1B VIM
Tcell_cytokine_induced_prolif	0.00111661	0.0286893	ENO1 GOT1 GSTO1 HSP90AA1 MAT2A MTHFD1 NOLC1 PA2G4 PAICS PRMT1 TXN	CDK6 GSTO1 HSP90AA1 ID2 MTHFD1 PA2G4 PRMT1 TXN
Tcell_cytokine_repressed	0.0284336	2.66965e-06	ADA CAMK4 CD27 CDC25B GRAMD1A HIST1H2AC ID3 PBXIP1 PDCD4 PMS2 ZFP36L2	ADA CAMK4 CCR7 CD27 CDC25B DPEP2 FAM102A FYB GRAMD1A ID3 ITGB7 LGMN PBXIP1 PDCD4 SELL SORL1 ZFP36L2
Thymic_DP_Tcell_gt_Thymic_SP_CD4+Tcell	0.000859021	3.38058e-05	ADA AKAP2 CBFA2T3 CEP70 CXXC5 DEPDC1 E2F7 FAIM FBXL12 GALNT2 GFI1 KIAA0182 LETM1 LOC202781 PAXIP1 PEX5 PPIL5 PTPN2 RBM33 SCRN1 SH3TC1 SLC1A4 SYK TNFRSF21 TTK XRCC6BP1 ZNF496	ADA AEBP1 AKAP2 BCL2L1 CBFA2T3 CPLX1 CXXC5 DAPK1 DEPDC1 DNMBP E2F7 ECT2 FAIM GALNT2 GFI1 GNA15 KIAA0182 LANCL2 LETM1 PEX5 RASSF6 SCRN1 SH3TC1 SLC1A4 SYK TFDP2 TTK UBASH3B XRCC6BP1
Thymic_SP_CD4+Tcell_gt_Blood_CD4+Tcell		5.32788e-05	BCL11A BCOR CORO1C CXXC5 DUSP2 EGR1 HIST1H2AC KLF10 MARCKS RGS1 RHOBTB3 RRM2 SCD SMC4 STMN1 TOX2 TSC22D1	AUTS2 BCL11A BCOR CCRL2 CD93 CORO1C CXXC5 DAPK1 DUSP2 EGR1 FLJ22536 GNB4 IGF2BP3 KLF10 MAML3 MARCKS NR4A2 PDE4D PTPRK RGS1 RRM2 SMC4 SOX4 STMN1 TFDP2 TOX2 ZMIZ1
XBP1_target_all	2.75743e-13	4.79248e-11	ATP2A2 CD81 CDKN3 COX15 DNAJB9 DNAJC3 EDEM1 ERGIC1 FTSJ1 GPR89B HERPUD1 HM13 HSP90B1 HSPA5 ISG20 LMAN1 MCFD2 MGAT2 PDIA3 PDIA4 PPIB PRDX4 RNASE4 RPN1 SEC61A1 SLC1A4 SPCS3 SSR1 SSR3 SSR4 ST6GALNAC4 SYVN1 TMED10 TRAM1 TXNDC5 UAP1 USO1	ATP2A2 CD81 CDKN3 DAD1 DNAJB9 DNAJC3 ERGIC1 FNBP1 GPR89B HERPUD1 HM13 HSP90B1 HSPA5 ISG20 LMAN1 MCFD2 PDIA3 PDIA4 PPIB PRDX4 RHOQ SLC1A4 SPCS3 SRP9 SSR1 SSR3 SSR4 ST6GALNAC4 SYVN1 TRAM1 TXNDC5 UAP1 USO1
XBP1_target_other	0.0150761		CD81 CDKN3 COX15 FTSJ1 GPR89B ISG20 PRDX4 RNASE4 SLC1A4	CD81 CDKN3 FNBP1 GPR89B ISG20 PRDX4 SLC1A4
XBP1_target_secretory	2.35691e-12	3.29307e-11	ATP2A2 DNAJB9 DNAJC3 EDEM1 ERGIC1 HERPUD1 HM13 HSP90B1 HSPA5 LMAN1 MCFD2 MGAT2 PDIA3 PDIA4 PPIB RPN1 SEC61A1 SPCS3 SSR1 SSR3 SSR4 ST6GALNAC4 SYVN1 TMED10 TRAM1 TXNDC5 UAP1 USO1	ATP2A2 DAD1 DNAJB9 DNAJC3 ERGIC1 HERPUD1 HM13 HSP90B1 HSPA5 LMAN1 MCFD2 PDIA3 PDIA4 PPIB RHOQ SPCS3 SRP9 SSR1 SSR3 SSR4 ST6GALNAC4 SYVN1 TRAM1 TXNDC5 UAP1 USO1
p53_targets	0.000521534	0.00720538	ANLN APAF1 APC ARID3A BAX BIRC5 BNIP3L CDC25C DNMT1 EEF1A1 FANCC GPX1 HRAS HSPA8 IRF5 MAD1L1 MDM2 MSH2 NDRG1 ODC1 PCNA PMS2 PRDM1 PRKAB1 RABGGTA RFWD2 RRM2B SCD TAP1 TP53INP1 TRIAP1	ANLN ARID3A BAX BDKRB2 BNIP3L CAV1 CDC25C CDKN1A DDIT4 DDR1 DNMT1 EEF1A1 FANCC HSPA8 IRF5 LGALS3 MAD1L1 MDM2 MSH2 NDRG1 PCNA RABGGTA RNF144B SLC38A2 TP53INP1 VDR
Foxp1_Targets	1.0886e-06	0.00429765	ADAM29 AKT1S1 ATF5 BUB3 CBX3 CEP68 CITED2 COPG CTDSP2 DAZAP2 DCAKD DUSP10 EFCAB2 EIF1 ELOVL6 EXO1 FAM60A GIT1 GTPBP1 HIST1H2BD HLA-E HS2ST1 LRP10 LTA4H MAN2B1 MDM2 METTL2A MSH2 MYST3 NEIL1 NEK9 NFATC4 OSR2 PIGF PIH1D1 PLEKHA8 PRDM15 PUS1 RFC1 RFTN1 RIF1 RRM2B RSBN1L SEPT9 SETD7 SLC25A40 SLC39A7 TAGLN2 TBC1D17 TRIB1 TSEN34 UBL7 VPREB3 VPS4B ZCWPW1 ZNF250 ZNF687	ADAM29 AKT1S1 APBB1IP BIK BUB3 CBX3 CITED2 CRADD CTDSP2 DAZAP2 DCAKD ECT2 EFCAB2 EIF1 ELOVL6 FAM60A GIT1 GTPBP1 HDAC9 HIST1H2BD HS2ST1 LRP10 MAML3 MAN2B1 MDM2 METTL2A MSH2 NEIL1 NFATC4 OSR2 PIGF PLEKHA8 PUS1 RFC1 RFTN1 RIF1 SEPT9 SLC25A40 TAGLN2 TSEN34 WASF2 ZNF250 ZNF687
Myc_Targets	3.40337e-33	3.61084e-11	ABL1 ACADM ACO2 ADAM22 AHCYL1 AKAP10 ALG5 AMD1 AMMECR1 AP4B1 AP4M1 AP4S1 APC ARF1 ARL1 ARRB2 ASB1 ASB16 ASH2L ATF4 ATP5G2 ATP5S BARD1 BAX BIRC6 BOP1 BRCA1 BRCA2 BRP44L BSG BTBD1 BZW1 CACYBP CAD CALR CASP8AP2 CBX3 CCNB1 CCND3 CCNG2 CD63 CDC25A CDC25B CDC25C CDC6 CEPT1 CHD1L CIAO1 CKS2 CLCN2 CMAS COIL COPS3 CORO1C COX15 CREB1 CREBL2 CRIPT CSDA CUL1 CYBA DAP3 DBI DCK DDX10 DDX11 DDX17 DDX50 DDX54 DE…	ACTG1 ADAM22 AHCYL1 AKAP10 AKAP9 ALG5 AMMECR1 AP4S1 APP ARF1 ARRB2 ARSB ASB1 ATP5G2 BARD1 BAX BCKDHB BIRC6 BLK BOP1 BRCA1 BSG BTBD1 CACYBP CAD CASP8AP2 CBX3 CCNB1 CCND3 CD2AP CD79B CDC25A CDC25B CDC25C CDC6 CDK6 CDKN1A CEPT1 CHD1L CISH CMAS COPS3 CORO1C CRADD CSDA CTNNA2 CYBA DBI DCK DCTN4 DDX11 DDX17 DDX50 DDX54 DEF6 DKC1 DLEU2 DUSP2 E2F1 EBNA1BP2 EEA1 EIF4A1 EIF4E ELK1 EPC1 ESD ETS2 FABP5 FBL F…
BCL6_target_ChIPseq	7.73185e-19	7.28391e-08	ABCB9 ABHD10 ACACA ACIN1 ACOT7 ACSF3 ACSL4 ACY3 ADAM22 ADCK5 ADIPOR2 ADNP ADPRHL1 AHSA2 AIFM1 AIM1 AKAP2 AKT1S1 ALG5 ALG8 ALOX5 ANAPC13 ANG ANKRD12 ANKRD13A ANLN APOLD1 ARF6 ARHGAP1 ARHGAP31 ARID1A ARID2 ARID3A ARID5A ARL1 ARL5B ARL6IP1 ARL6IP6 ARL8A ARMC1 ARMC5 ARMC8 ARPC5L ARRB2 ATAD2 ATAD2B ATG16L2 ATL2 ATL3 ATP2A3 ATP5G3 ATP6V0B ATP6V1A AZIN1 B2M B3GALNT2 B3GNT2 B4GALT5 BCAS4 BCL11A BCL2L11 B…	ABCG1 ABHD10 ABHD15 ABR ACIN1 ACSF2 ACSF3 ACY3 ADAM10 ADAM22 ADAMTS13 ADIPOR2 ADNP ADPRHL1 AEBP1 AFF1 AIM1 AKAP12 AKAP2 AKT1S1 ALG5 ALG8 ALOX5 ALOX5AP ANKRD11 ANKRD46 ANLN APBB1IP APOLD1 ARF6 ARHGAP1 ARHGAP24 ARHGAP31 ARHGDIB ARID1A ARID2 ARID3A ARID5A ARL5B ARL6IP1 ARL6IP6 ARL8A ARMC1 ARMC8 ARPC5L ARRB2 ASB3 ATG16L2 ATG5 ATL2 ATP2A3 ATP5G3 ATP6V1C1 ATXN1 AUTS2 AZIN1 B2M B3GNT2 B3GNT7 BACH2 BANF1…
BACH2_target_ChIPseq	2.30132e-101	7.38794e-80	AAAS AARS2 ABCB9 ABCD1 ABCF3 ACACA ACADVL ACO2 ACTB ACY3 ADAM15 ADAM22 AFG3L1 AFTPH AGTPBP1 AHCYL1 AIM1 AK7 AKAP11 AKAP2 AKT1S1 ALDOA ALG8 ALMS1 ALOX5 AMZ2 ANAPC11 ANAPC7 ANG ANKRD12 ANKRD13A ANKRD13D ANKRD33B ANKRD39 ANP32A ANP32E AP4B1 AP4M1 APRT ARCN1 ARF1 ARF6 ARID1A ARID1B ARID5A ARL16 ARL6IP4 ARL8A ARMC5 ARPC5L ASH2L ASPM ASPSCR1 ATAD2 ATAD2B ATAD5 ATG16L2 ATL2 ATL3 ATP2A2 ATP2A3 ATP5G2 ATP…	AARS2 ABCC1 ABCD1 ABCG1 ABHD15 ABR ACADVL ACOXL ACSF2 ACTG1 ACY3 ADAM10 ADAM15 ADAM19 ADAM22 ADRBK1 AFF1 AFF2 AFG3L1 AFTPH AGTPBP1 AHCYL1 AIM1 AIM2 AKAP11 AKAP2 AKIRIN2 AKNA AKT1S1 ALDOA ALG8 ALOX5 ALOX5AP AMZ2 ANAPC7 ANKRD39 ANP32A ANXA4 APBB1IP APBB2 APRT ARCN1 ARF1 ARF6 ARHGAP24 ARHGDIB ARID1A ARID1B ARID5A ARL16 ARL8A ARL8B ARMC9 ARPC5L ARSB ARSG ATG16L2 ATG5 ATL2 ATP2A2 ATP2A3 ATP5G2 ATP6V1E…
denovobivGenes	0.00428124	4.34911e-07	AAAS ABHD10 ACADVL ACSF3 ACTN3 ALMS1 ANXA5 ARID1B ARID3A B3GALNT2 B3GNT2 BCOR BDH1 CBR3 CCDC112 CEP152 CEP70 CHST11 CLCN2 CREB3L2 CRYM CSNK1G3 CTNNB1 CXCR4 DAZAP1 DPYD DTNBP1 DTX4 DYRK2 ESD FABP5 FAM173A FASTK FBXO28 FER FOXP1 FRAT1 FRAT2 G2E3 GALNT2 GCLC GNG7 GSTP1 GTPBP3 HCFC1R1 HCRT HECTD2 HERC5 HPCAL1 ID3 IGF2R IMPAD1 IRF4 ISCA2 JUN KCNA3 KIAA0182 KIAA1033 KLHL15 LCORL LEPROTL1 LFNG LIMD1 LIX…	ABCG1 ABHD10 ABLIM2 ACADVL ACSF3 AFF1 AHDC1 AKT1 ANKRD46 ANXA4 APP ARHGAP26 ARID1B ARID3A ASAP1 ATG5 AUTS2 B3GNT2 BCOR BDH1 BHLHE41 CADM1 CBR3 CCDC112 CCDC85C CDC42BPB CDK6 CDYL CELF2 CEP152 CHST11 CHST15 CHSY1 CMIP CRAMP1L CREB3L2 CRTC3 CRYM CXCR4 DAZAP1 DLG2 DPYD DTNB DTNBP1 DYRK2 ERCC1 ERN1 ESD ETV6 FABP5 FASTK FBP1 FBXO28 FER FHOD1 FOXJ2 FOXP1 G2E3 GAB1 GALNT2 GCLC GNB4 GNG7 GSTP1 GTPBP3 HEBP…
NB_GCB_Progression_All_Genes_RPKM_enhancer_gain_plus3_plus4	0.00368687	6.02913e-09	ANAPC4 ANKRD13A ANKRD33B ANP32B ASXL1 ATL2 ATXN10 B4GALT5 BRWD1 BUB3 CAMK4 CAMKK2 CAMTA1 CEP350 CXXC5 DDX10 DUSP10 EEA1 ETS2 EZH2 FBXO31 FBXO48 GM2A GPAM HMGB1 HS2ST1 KIAA0319L KIAA1609 LBR LIN9 LRCH3 LRRK1 LSM14A MCM5 MFSD2A MNS1 MOSPD2 MTHFD1 PARN PIGU PSAT1 PTTG1 RAB3IP RBM16 REEP3 RFWD2 SGPP1 SHCBP1 SHQ1 SLC19A1 SLC43A1 SPCS3 TEX264 TMEM194A TMEM194B TNKS TRERF1 UBQLN1 UCP2 UGGT1 ZBTB8OS ZNF1…	ANAPC4 ANKRD1 ANP32B ARL8B ARMC9 ATL2 ATXN1 ATXN10 BIK BTBD12 BUB3 CADM1 CAMK4 CAMKK2 CD38 CEP350 CROCC CXXC5 CYTH1 DEGS2 DGKG DYNC1H1 EEA1 EEPD1 ETS2 FBXO31 GM2A GPAM HIVEP1 HMGB1 HS2ST1 HSD17B12 ITGAE KIAA1609 KLHL6 L3MBTL4 LBR LIN9 LRRK1 MCM5 MFSD2A MNS1 MOBKL1A MTHFD1 MYOF NAV2 NCOA1 NINJ1 NUDCD3 ODF1 PARN PPP2R5E PSAT1 PSMA6 PTTG1 RAB3IP RASSF6 REEP3 RFC3 ROCK2 SGPP1 SHCBP1 SLC10A2 SLC19A1 S…
NB_GCB_Progression_All_Genes_RPKM_enhancer_loss_minus3_minus4	8.72609e-06	4.82895e-15	ACBD3 ADK AGTPBP1 ANP32A AP1B1 AP1M1 ARGLU1 BTK CAMK2D CBLB CCS CNOT6L CPEB3 CREB3L2 DARS DDX6 DPYD DRAM2 E2F3 EDEM1 EPC1 ERGIC1 GLCCI1 HIF1A HMBOX1 HNRNPD HNRNPL IFNAR1 INTS1 JUN KDM2B KDM6A KLRAQ1 LNPEP LSM7 MALT1 MAP3K5 MARCKS MED14 MED15 METTL8 MLLT3 MTF1 MYBPC2 NAB2 NIN NR3C2 OSBPL8 P2RY10 PCBP1 PCGF5 PDE8A PDHX PDS5B PECI PFKP PKN2 PRCD PRCP PTGER4 PTPN1 RASA1 RILPL2 RIPK2 RNF125 RREB1 S1PR…	ACBD3 ADAM10 ADAMTS13 ADK AFF1 AGTPBP1 ANKRD55 ANP32A AP1B1 AP1M1 ARHGAP26 BRF1 BTK CAMK2D CBLB CCR7 CHSY1 CLCN7 CNOT6L CREB3L2 CYGB DMXL1 DNM2 DPYD EPC1 ERGIC1 FBRSL1 FBXO15 FBXW11 FHIT FLT3 FYB GAB1 GAS7 GPM6A HIF1A HMBOX1 HNRNPD HNRNPL IFNAR1 IFNAR2 IL22RA2 INTS1 JUN KAT2B KDM2B KLRAQ1 LAMA3 LCLAT1 LIMS2 LNPEP MARCKS MCART6 MED15 METTL8 MYBPC2 NCRNA00158 NDUFV2 OSBPL8 P2RY10 PCBP1 PCGF5 PDE4B …
NB_GCB_Progression_All_Genes_RPKM_minus2	1.11073e-08	2.63797e-25	ABHD10 ACADM ACBD3 ACVR1B ADK AGTPBP1 ALDH3B1 ALG8 ANKMY1 ANKRD12 ANLN ANP32A AP1B1 APOO ARF1 ARNT ARPC5L ATIC ATP2A3 ATP6V1E1 B2M B3GNT2 BRD1 BTK BTN2A2 CAP1 CDCA7L CDK5RAP2 CDKN2BAS CEP250 CIITA CKAP2L CLK3 CLN6 CLPB CMTM7 CNOT6L CNPY3 CORO1C CPEB3 CREB1 CSDA CSE1L CSNK2A1 CTDP1 CYP4V2 DCK DIS3L2 DLEU1 DNAJC3 DTNBP1 DUSP12 DYNC1LI1 DYRK2 E2F3 E2F5 EIF2C1 EIF4G2 ELAVL1 EML4 ENPP7 EPC1 ERP29 FLNB…	AACS ABHD10 ACBD3 ACVR1 ACVR1B ADAMTS13 ADK AGTPBP1 AK1 AKIRIN2 ALDH3B1 ALG8 ALPK1 ANLN ANP32A ANTXRL AP1B1 APOO APP ARF1 ARPC5L ARSG ATP2A3 ATP6V1E1 ATP8A2 B2M B3GNT2 B3GNT7 BRF1 BTK BTN2A2 CCR7 CD7 CDCA7L CDK5RAP2 CDKN2BAS CDYL CHST15 CHSY1 CIITA CKAP2L CLCN7 CLK3 CLN6 CMTM7 CNOT6L CNPY3 CORO1C CP CRAMP1L CSDA CSE1L CSNK2A1 CYGB DAPK1 DCK DDIT4 DGKD DIS3L2 DLEU2 DNAH1 DNAJC3 DNM2 DPEP2 DTNB DTN…
NB_GCB_Progression_All_Genes_RPKM_minus5	0.0177619	2.44859e-12	AP1M1 ARGLU1 BCL11A CCS DARS DDX6 DPYD DRAM2 EDEM1 ERGIC1 GALNT2 GCET2 GNG7 HNRNPD IFNAR1 ITGA4 KDM2B KDM6A LEMD3 LNPEP LSM7 LTA4H MAP3K5 MAPK1 MBP MED14 METTL8 MIPEP MLLT3 OSBPL8 PCGF5 PPP3CA PRCP RASA1 RBM33 RNF125 RREB1 SCLT1 SDCCAG8 SFMBT2 SFRS2IP SLC38A1 SMCHD1 SP4 SPRY1 SPTBN1 STT3B TBC1D22A TLR10 TMED10 URB2 YLPM1 ZNF621	ADAM10 AKNA ANKRD11 ANKRD55 AP1M1 BCL11A BHLHE40 CARD11 CARS2 CD83 CLLU1 CMIP COBLL1 CRTC3 DMXL1 DPYD ERGIC1 EVL FBXW11 FHIT FYB GAB1 GALNT2 GCET2 GNA12 GNG7 HDAC9 HNRNPD IFNAR1 IFNAR2 ITGA4 KAT2B KDM2B KIAA0802 LAMA3 LEMD3 LNPEP LYN MBP MCART6 METTL8 MICAL3 MIPEP NCOR2 NCRNA00158 NDUFV2 OSBPL8 PCGF5 PKIG RALYL RNF125 RPTOR RREB1 RXRA SDCCAG8 SERINC5 SERPINB9 SFMBT2 SFRS2IP SFRS8 SLC24A2 SLC38A1 …
NB_GCB_Progression_All_Genes_RPKM_minus10		5.6755e-14	AIM1 ARID1B CAMK2D CREB3L2 ETS1 EZR FOXP1 HMBOX1 MARCH3 PIK3AP1 PRKCE PTPN1 S1PR1 SIK3 TCF4 TGFBR2 TNFAIP8	ADARB1 AFF1 AIM1 ARID1B BACH2 BLK CAMK2D CREB3L2 ELOVL5 ETS1 EZR FBRSL1 FBXO15 FOXP1 GAS7 HMBOX1 IKZF3 LCLAT1 MGAT5 MSI2 MSN PDE4B PIK3AP1 PLCG2 PLXNC1 PPP1R16B PRKCB PTPN1 RIN3 SELL SEPT6 SP100 ST18 TGFBR2 TNFAIP8 TTC7A VAV3 WASF2 XYLT1 ZBTB16
NB_GCB_Progression_All_Genes_RPKM_minus2.to.plus2	1.27699e-14	6.03468e-33	ABCB9 ABCD3 ABL1 ACACA ACAP1 ACO2 ACOT7 ACSF3 ACTB ADIPOR2 ADNP ADPRHL1 AFG3L1 AFTPH AHCYL1 AK2 AK7 AKAP2 ALOX5 AMD1 AMZ2 ANAPC7 ANG ANKS3 ANXA5 AOX2P APLF APOBEC3G APOLD1 ARAP2 ARF6 ARFGAP3 ARHGAP1 ARHGAP19 ARID1A ARID2 ARID3A ARL13B ARL3 ARPC1B ARRB2 ASXL2 ATAD2 ATF4 ATF5 ATG10 ATG16L2 ATP2A2 ATP5G3 ATP5S ATXN7 BARD1 BDH1 BIN3 BLCAP BLM BSG BTBD1 BTN3A1 BTN3A2 BUB1B C1GALT1 C2CD2 CACYBP CALU CA…	ABHD12B ABHD15 ABLIM2 ABR ACACB ACAP1 ACSBG2 ACSF2 ACSF3 ADAM19 ADAMTS18 ADAMTS7 ADAP1 ADCY10 ADIPOR2 ADNP ADPRHL1 ADRBK1 AFG3L1 AFTPH AHCYL1 AHDC1 AIM2 AK2 AKAP12 AKAP2 AKAP4 ALOX5 ALOX5AP AMZ2 ANAPC7 ANKRD46 ANXA4 AOX2P APCDD1 APOBEC3F APOBEC3G APOF APOLD1 ARAP2 ARF6 ARFGAP3 ARHGAP1 ARHGAP19 ARID1A ARID2 ARID3A ARL4C ARMC4 ARPC1B ARRB2 ASXL2 ATG16L2 ATG5 ATN1 ATP10B ATP2A2 ATP5G3 ATP5O ATP6V1C1…
NB_GCB_Progression_All_Genes_RPKM_plus10	0.00368687	6.02913e-09	ANAPC4 ANKRD13A ANKRD33B ANP32B ASXL1 ATL2 ATXN10 B4GALT5 BRWD1 BUB3 CAMK4 CAMKK2 CAMTA1 CEP350 CXXC5 DDX10 DUSP10 EEA1 ETS2 EZH2 FBXO31 FBXO48 GM2A GPAM HMGB1 HS2ST1 KIAA0319L KIAA1609 LBR LIN9 LRCH3 LRRK1 LSM14A MCM5 MFSD2A MNS1 MOSPD2 MTHFD1 PARN PIGU PSAT1 PTTG1 RAB3IP RBM16 REEP3 RFWD2 SGPP1 SHCBP1 SHQ1 SLC19A1 SLC43A1 SPCS3 TEX264 TMEM194A TMEM194B TNKS TRERF1 UBQLN1 UCP2 UGGT1 ZBTB8OS ZNF1…	ANAPC4 ANKRD1 ANP32B ARL8B ARMC9 ATL2 ATXN1 ATXN10 BIK BTBD12 BUB3 CADM1 CAMK4 CAMKK2 CD38 CEP350 CROCC CXXC5 CYTH1 DEGS2 DGKG DYNC1H1 EEA1 EEPD1 ETS2 FBXO31 GM2A GPAM HIVEP1 HMGB1 HS2ST1 HSD17B12 ITGAE KIAA1609 KLHL6 L3MBTL4 LBR LIN9 LRRK1 MCM5 MFSD2A MNS1 MOBKL1A MTHFD1 MYOF NAV2 NCOA1 NINJ1 NUDCD3 ODF1 PARN PPP2R5E PSAT1 PSMA6 PTTG1 RAB3IP RASSF6 REEP3 RFC3 ROCK2 SGPP1 SHCBP1 SLC10A2 SLC19A1 S…
NB_GCB_Progression_All_Genes_RPKM_plus5		1.25651e-15	ADA AKAP11 ANKRD13A AZIN1 BCAS4 BCOR BRWD1 CAMK4 CAMKK2 CARS CCNL1 CD58 CXXC5 DDX10 DUSP10 EEA1 EZH2 FOXN3 GM2A GPAM HERPUD1 HMGB1 HMHB1 HPCAL1 HS2ST1 IL10RA IQSEC1 ITPR2 KCNN3 KIAA0947 LCK LIG1 LIN9 LRIG1 LRRC33 LRRC8D LSM14A MCOLN2 MDM1 MOSPD2 MYO9B NFYC NR3C1 PIM1 PPTC7 PTTG1 RAB3IP REL RFC2 SGPP1 SHQ1 SLC19A1 SND1 TOP3B TRIM14 TRIO TXNDC5 UBQLN1 UGGT1 VOPP1	ADA AFF2 AKAP11 ANKRD16 APBB1IP APBB2 ARL8B ARMC9 ARSB AUTS2 AZIN1 BCAS4 BCOR BFSP2 BTBD12 CADM1 CAMK4 CAMKK2 CAPZB CARS CD48 CD58 CD80 CDK6 CSMD1 CXXC5 DMD DYNC1H1 EEA1 FOXN3 GM2A GPAM H3F3C HECW2 HERPUD1 HIVEP1 HMGB1 HMHB1 HPCAL1 HS2ST1 HSD17B12 ICA1 ID2 IGF2BP3 ILDR1 INPP5D IQSEC1 ITGAE ITPR2 KCNN3 KIAA0247 KLF13 L3MBTL4 LHPP LIG1 LIN9 LRIG1 LRRC33 LRRC8D MCOLN2 MDM1 MDS2 MGC87042 MME MMP20 MO…
NB_GCB_Progression_All_Genes_RPKM_plus2	2.10415e-08	2.24961e-31	ABCD1 ACSL4 ADAM29 AFMID AIP ANAPC4 APC ASH2L ATAD2B ATL2 ATXN10 BCL2L11 BOP1 BRIP1 BRMS1L BUB1 BUB3 BUD13 CAMTA1 CBFA2T3 CBLB CCDC109B CCDC126 CD59 CD74 CD81 CDKN2AIP CDKN2C CDR2 CENPM CEP350 CHRAC1 CITED2 CKS2 CLINT1 COPG CSNK1G3 CTBP1 CTDSP2 DAZAP2 DCP2 DCUN1D1 DEF6 DEF8 DEK DIP2A DLG1 DNAJB12 DSN1 DUSP2 EBF1 EEF2K EFTUD1 EGLN2 EGR1 EIF2AK3 EIF3A ELL3 ETS2 FAM76B FBXO28 FBXO31 FBXO48 FGD2 FTSJ…	ABCC1 ABCD1 ABCG1 ACOXL ADAM29 ADARB2 AEBP1 AIP ANAPC4 ARHGAP26 ATL2 ATXN10 BAG3 BANP BCL2L11 BCL7C BIK BOP1 BRIP1 BRMS1L BUB1 BUB3 BUD13 CABLES1 CBFA2T3 CBLB CCDC109B CCDC12 CD244 CD59 CD81 CDH23 CDKN1A CDKN2AIP CDKN2C CDR2 CENPM CEP110 CEP350 CHRAC1 CITED2 CLINT1 CLPTM1L CNR2 COL9A3 COTL1 CRB2 CREB3L1 CRELD2 CROCC CROCCL2 CTBP1 CTDSP2 CXCR5 DAZAP2 DCP2 DCUN1D1 DEF6 DEGS2 DEK DIP2A DIXDC1 DLG2 D…
GCB_BCL6SMRT_Distal_Enhancer	0.0151907	2.07969e-22	AKAP11 AMZ2P1 ANAPC4 AP1M1 B4GALT5 BCL11A BCL2L11 BCOR BTN3A2 BUB3 CAND1 CBFA2T3 CDCA7L CHRAC1 CKAP2L CLINT1 CXCR4 DARS DNAJB12 DUSP10 DYRK2 EEA1 ETS1 ETS2 FCHSD2 FGD2 FLJ36031 FLNB HERPUD1 HERPUD2 HMGA1 IQSEC1 IRF2 ITPR2 JUND KIAA0947 KIF14 KLF2 KLHDC4 LBR LIG1 LMNB1 LOC100133612 LOC646982 LRIG1 MAN1A1 MAX MCM3 MKI67 MRPL4 MSH6 NAIF1 NEK2 NFKBIA NRSN2 OLA1 PARP1 PIK3AP1 PIM1 PPTC7 PRDX6 PSAT1 PT…	ABR ADAM19 AKAP11 AKIRIN2 ALOX5AP ANAPC4 ANKRD46 ANXA4 AP1M1 APCDD1 ARL4C ARSB ATP5O BACH2 BCL11A BCL2L11 BCOR BTN3A2 BUB3 CAND1 CBFA2T3 CD28 CD2AP CD83 CDCA7L CDHR3 CHD2 CHD7 CHRAC1 CKAP2L CLINT1 CLLU1 CRELD2 CXCR4 CXCR5 DAD1 DLEU2 DMXL1 DNAJB12 DYRK2 EEA1 ERCC1 ETS1 ETS2 FAM102A FAM92B FAM9C FBRSL1 FCHSD2 FLNB FLT1 GFOD1 GPM6A H3F3C HERPUD1 HERPUD2 HMGA1 HUWE1 ID2 IKZF1 IL4R INF2 IQSEC1 IRF2 IT…
GCB_bivalentProm_genes		0.00115095	AAAS ABCD3 ABHD10 ACADVL ACSF3 ACTN3 ADAM22 ALMS1 ANKRD27 ANXA5 ARID1B ARID3A ARMC8 ATP5G2 B3GALNT2 B3GNT2 BCL2L11 BCOR BDH1 BSPRY BUB3 C2CD2 CBR3 CBX4 CBX8 CCDC112 CCDC93 CCDC99 CD3EAP CDKN2A CEP152 CEP70 CHCHD7 CHST11 CLCN2 CREB3L2 CRYM CSNK1G3 CTDSP2 CTNNB1 CXCR4 DAZAP1 DCTD DEPDC1B DLG1 DPYD DTNBP1 DTX4 DYRK2 ENTPD7 ESD ESR2 ESRRA ETS2 FABP5 FAM173A FAM91A1 FASTK FBXO28 FER FOXP1 FRAT1 FRAT2 …	ABCG1 ABHD10 ABLIM2 ACADVL ACSF3 ADAM22 ADAMTS7 AFF1 AHDC1 AKT1 ANKRD27 ANKRD46 ANXA4 APBA1 APBB2 APP ARHGAP26 ARID1B ARID3A ARL4C ARMC8 ARMC9 ASAP1 ATG5 ATP5G2 ATXN1 AUTS2 B3GNT2 BCL2L11 BCOR BDH1 BHLHE41 BSPRY BUB3 C2CD2 CADM1 CAV1 CBR3 CBX4 CCDC112 CCDC85C CCDC93 CCDC99 CDC42BPB CDK6 CDYL CELF2 CEP152 CHCHD7 CHST11 CHST15 CHSY1 CMIP CPNE2 CRAMP1L CREB3L2 CRTC3 CRYM CTDSP2 CXCR4 DAZAP1 DCTD DEP…
GC_termDiff_Genes	0.00138299	2.16022e-14	ABHD14A ADI1 ALG5 ANAPC11 ANG APOA1BP APRT ARAP2 ARFGAP3 ARID3A ARID5A ARL1 ATP6V0B B2M B3GNT2 BCAP31 BET1L BIRC5 BRP44L BSG BTN3A1 BTN3A2 BTN3A3 CALR CALU CAMK4 CD59 CD63 CD99L2 CDKN2C CDKN3 CDR2 CENPM CHST7 CORO1C CREB3L2 CREBL2 CXXC5 CYBA CYC1 DCTD DEAF1 DEPDC1B DGKA DNAJB5 DNAJB9 DNAJC3 DPEP1 DPYD DRAP1 EDEM2 EEF1A1 EEF1D ESCO2 ESYT1 FAIM3 FKBP11 FKBP2 FKBP5 FKBP8 FTSJ1 GAA GALNT2 GBE1 GFI1 G…	ABCG1 ACOXL ACVR1 ADAM10 ADAP1 ADI1 AEBP1 AFF1 ALG5 ANKRD55 APP APRT ARAP2 ARFGAP3 ARID3A ARID5A ARL4C ATP8A2 ATXN1 B2M B3GNT2 BCL2L1 BCL7C BCL9L BDKRB2 BET1L BHLHE40 BHLHE41 BSG BTN3A2 CABLES1 CALU CAMK4 CAV1 CCR7 CD247 CD28 CD48 CD59 CD7 CD9 CDKN2C CDKN3 CDR2 CELF2 CENPM CHST7 CISH CLPTM1L CNIH3 CORO1C CREB3L2 CRELD2 CRTC3 CSMD1 CTNNA2 CXCR5 CXXC5 CYBA CYC1 D4S234E DAD1 DAPK1 DCTD DEPDC1B DERL3…
Ly1_BCL6RD2mut_upreg	0.00234499	2.28973e-15	ACAP1 AMZ2P1 ANKRD33B AOX2P AP1B1 APOLD1 ARHGAP11B ARHGAP31 ARID3A ARID5A ARRB2 ATF5 AURKA AURKB B2M B3GNT2 BCOR BRP44L BUB1 C2CD2 CARHSP1 CASP7 CBFA2T3 CBR3 CCDC112 CCDC114 CCDC142 CCDC150 CCDC163P CCDC82 CCT6P3 CD58 CDKN2AIP CDKN2D CDKN3 CENPA CEP57 CEP70 CHAC1 CHAD CHEK2 CIDECP CIT CMTM7 CORO1C CREBZF CSAD CSDA CSNK1E CTDSP2 CXCR4 CYTH2 DHX58 DLG4 DNAJB4 DOK3 DPEP1 E2F2 E2F7 EBF1 EFCAB2 EFCAB4…	ABHD15 ACAP1 ACOXL ACSF2 ACVR1 ADARB1 AEBP1 AFF1 AHDC1 AK1 AKAP12 AKIRIN2 AOX2P AP1B1 APBA1 APBB2 APOLD1 ARHGAP26 ARHGAP31 ARID3A ARID5A ARPP21 ARRB2 ASB3 ATXN1 AURKA AURKB AUTS2 B2M B3GNT2 BANP BCL2L1 BCL9L BCOR BEST3 BFSP2 BHLHE40 BHLHE41 BUB1 C2CD2 CABLES1 CADM1 CALCOCO1 CAPSL CARHSP1 CASP7 CBFA2T3 CBR3 CCDC112 CCDC150 CCR7 CD28 CD58 CD9 CDC42BPB CDHR3 CDKN1A CDKN2AIP CDKN3 CELF2 CENPA CHAD CH…
Ly1_siBCL6_48h_upreg	2.37315e-05	1.5987e-13	ABHD10 ACAP1 ALDH3B1 ANKRD33B ANLN APOLD1 ARHGAP31 ARID2 ARID3A ARL13B ARRB2 ATF5 AURKB B2M B3GALNT2 BCOR BNIP3L BRD1 BUB1 CBR3 CCDC112 CCDC163P CDKN2D CENPA CENPBD1 CENPK CENPO CEP152 CEP70 CHST7 CITED2 CKAP2L CLDND1 CORO1C CPEB2 CREBL2 CTDSP2 CXCR4 CYP20A1 DCLRE1B DCTD DDX26B DEF6 DNAJB4 DTL E2F7 E2F8 EBF1 EFCAB4A ENO3 EPSTI1 ERC1 ERI2 FAIM3 FAM120C FAM129A FAM13B FAM161A FANCI FER FLJ37453 FOX…	ABCG1 ABHD10 ACACB ACAP1 ACOXL ACSF2 ACVR1 AEBP1 AFF1 AHDC1 ALDH3B1 ANLN APOLD1 ARHGAP31 ARID2 ARID3A ARPP21 ARRB2 ATXN1 AURKB AUTS2 B2M BAIAP3 BCOR BHLHE41 BNIP3L BUB1 CABLES1 CADM1 CAPSL CBR3 CCDC112 CCR7 CDHR3 CELF2 CENPA CENPK CEP152 CHD2 CHST7 CISH CITED2 CKAP2L CLDND1 CORO1C CPNE2 CRTC3 CTDSP2 CXCR4 CYP20A1 DCTD DDIT4 DDX26B DEF6 DLEU2 DMD DNTT DOCK10 DTL DTNB E2F7 EBF1 ECT2 EFNA5 EHBP1L1 E…
GCB.DLBCL_1085_intersectSignature_Matt	8.72609e-06	3.9074e-05	ABCB9 ADIPOR2 AFTPH AKAP10 AKAP8L AKT1S1 ANKRD12 ARL6IP1 ARL8A ASXL2 ATF2 ATF4 ATP6V1E1 ATXN7 B3GNT2 B9D2 BCAP31 BCL2L11 BNIP3L BRD1 CARS CBLB CBX4 CCDC142 CCNL1 CDK13 CDKN2AIP CHAC1 CHPF2 CLDND1 CLK3 CNOT6L CPEB2 CPEB3 CPSF7 CRKL CRYM CSNK1D CSNK1G3 CTNNB1 CTNS CXCR4 CYTH2 DEDD2 DERL1 DNAJA1 DNAJB12 DNAJB14 DNAJB4 DNAJB9 DNAJC3 DUSP10 E2F3 EDEM3 EIF1 EIF2AK3 EIF2C3 EIF5 EP300 EPC1 ERBB2IP ETFDH …	ADIPOR2 AFTPH AHDC1 AKAP10 AKAP8L AKIRIN2 AKT1S1 ANKRD11 ARL6IP1 ARL8A ARL8B ASPRV1 ASXL2 ATG5 ATP6V1C1 ATP6V1E1 ATXN7L3 B3GNT2 BAG3 BANP BCL2L11 BHLHE40 BNIP2 BNIP3L CARS CBLB CBX4 CCR7 CD244 CD28 CDKN1A CDKN2AIP CEP97 CHD2 CLASP1 CLDND1 CLK3 CNOT6L CPSF7 CRYM CSNK1D CTNS CXCR4 CYTH2 DEDD2 DERL1 DFNB31 DNAH10 DNAJA1 DNAJB12 DNAJB9 DNAJC3 EDEM3 EEPD1 EIF1 EIF2AK3 EIF2C3 ELF1 EPC1 ERN1 ETV5 FAM102…
GCB.DLBCL_1085_intersectSignature_Huimin	9.22356e-08	0.000150118	ADIPOR2 AFTPH AKAP10 ANKRD12 ARF1 ARL8A ASXL2 ATF2 ATP2A2 ATXN2 ATXN2L B3GNT2 BCAP31 BNIP3L CACYBP CARS CBX4 CCNL1 CD63 CDK13 CDKN2AIP CEP350 CHAC1 CIDECP CLDND1 CLK3 CNOT6L CPEB2 CPEB3 CPSF7 CRKL CSNK1D CSNK1G3 CSNK2A1 CTDSPL2 CTNNB1 CTNS CXCR4 DAZAP2 DDA1 DEDD2 DERL1 DERL2 DNAJA1 DNAJB12 DNAJB14 DNAJB9 DNAJC3 DUSP10 E2F3 EDEM3 EIF1 EIF2AK3 EIF5 EPC1 ERBB2IP ETFDH ETS2 FAF2 FAM134C FAM91A1 FBXO3…	ADIPOR2 AFTPH AHDC1 AKAP10 ANKRD11 ARF1 ARL8A ARL8B ASXL2 ATG5 ATP2A2 ATP6V1C1 ATXN2 ATXN7L3 B3GNT2 BAG3 BANP BHLHE40 BNIP2 BNIP3L CACYBP CARS CBX4 CCR7 CDKN1A CDKN2AIP CEP350 CEP97 CHSY1 CLASP1 CLDND1 CLK3 CNOT6L CPSF7 CSNK1D CSNK2A1 CTNS CXCR4 DAZAP2 DDA1 DEDD2 DERL1 DNAJA1 DNAJB12 DNAJB9 DNAJC3 EDEM3 EIF1 EIF2AK3 ELF1 EPC1 ERN1 ETS2 FAM134C FAM91A1 FBXW11 FOXJ3 G2E3 GABARAPL1 GABPA GALNT2 GATA…
ly1.promoter.BCL6.all.3140	8.52054e-112	2.23259e-74	ABCB9 ABHD10 ACACA ACIN1 ACOT7 ACSF3 ACSL4 ACY3 ADAM22 ADCK5 ADIPOR2 ADNP ADPRHL1 AHSA2 AIFM1 AIM1 AKAP2 AKT1S1 ALG5 ALG8 ALOX5 ANAPC13 ANG ANKRD12 ANKRD13A ANLN APOLD1 ARF6 ARHGAP1 ARHGAP31 ARID1A ARID2 ARID3A ARID5A ARL1 ARL5B ARL6IP1 ARL6IP6 ARL8A ARMC1 ARMC5 ARMC8 ARPC5L ARRB2 ATAD2 ATAD2B ATG16L2 ATL2 ATL3 ATP2A3 ATP5G3 ATP6V0B ATP6V1A AZIN1 B2M B3GALNT2 B3GNT2 B4GALT5 BCAS4 BCL11A BCL2L11 B…	ABCG1 ABHD10 ABHD15 ABR ACIN1 ACSF2 ACSF3 ACY3 ADAM10 ADAM22 ADAMTS13 ADIPOR2 ADNP ADPRHL1 AEBP1 AFF1 AIM1 AKAP12 AKAP2 AKT1S1 ALG5 ALG8 ALOX5 ALOX5AP ANKRD11 ANKRD46 ANLN APBB1IP APOLD1 ARF6 ARHGAP1 ARHGAP24 ARHGAP31 ARHGDIB ARID1A ARID2 ARID3A ARID5A ARL5B ARL6IP1 ARL6IP6 ARL8A ARMC1 ARMC8 ARPC5L ARRB2 ASB3 ATG16L2 ATG5 ATL2 ATP2A3 ATP5G3 ATP6V1C1 ATXN1 AUTS2 AZIN1 B2M B3GNT2 B3GNT7 BACH2 BANF1…
ly1.promoter.BCL6.SMRT.BCOR.341	3.75969e-17	1.77882e-15	ACSF3 ACY3 ADNP AKAP2 ARHGAP31 ARID3A ARL1 ARMC5 ARMC8 ARPC5L ARRB2 ATP2A3 B2M B3GNT2 BCAS4 BRPF1 CCDC88C CCM2 CCNL1 CHST7 CIITA CNPY3 DGKA ENO3 ERP29 FADD FAIM3 FAM13B FCRLA FLJ43663 GGNBP2 GSK3B H2AFV HERPUD1 HSP90B1 HSPB1 ISG20 ITGA4 JUND KCNN3 LIMD1 LIMD2 LNPEP LOC253724 LOC646982 LPXN LRRC33 LYL1 MAPK1 MAPRE2 MDM2 MYO1G NBN NFKBIA NFKBID NIPA2 NUP88 PARP15 PDE12 PEX2 PFN1 PPP1R2 PRDM1 PRDM15…	ABR ACSF3 ACY3 ADNP AFF1 AKAP2 APBB1IP ARHGAP31 ARID3A ARMC8 ARPC5L ARRB2 ATP2A3 B2M B3GNT2 BCAS4 BRPF1 CCDC88C CCM2 CD79B CD83 CELF2 CHST7 CIITA CNPY3 DGKA DLEU2 EFNA5 ERP29 ETV5 FAM13B FCRLA FLJ43663 GGNBP2 HDAC9 HERPUD1 HIST1H4H HIVEP1 HSP90B1 HSPB1 ID2 ISG20 ITGA4 KCNN3 LIMD2 LNPEP LOC646982 LRRC33 MAPRE2 MDM2 MKLN1 MTMR12 NBN NEDD9 NFKBID PAN3 PEX2 PFN1 PHTF2 PPP1R2 PRIM1 RAB43 RASSF2 RASSF6…
ly1.promoter.BCL6-SMRT.all.451	1.32679e-16	9.82591e-21	ACSF3 ACY3 ADNP AKAP2 ALG5 ARHGAP31 ARID3A ARL1 ARMC5 ARMC8 ARPC5L ARRB2 ATP2A3 B2M B3GNT2 BCAS4 BRPF1 CCDC18 CCDC88C CCM2 CCNL1 CHST7 CIITA CNPY3 DGKA E2F1 EFCAB5 ENO3 ERP29 EXOSC8 FADD FAIM3 FAM13B FCRLA FLJ43663 GCET2 GGNBP2 GSK3B H2AFV HERPUD1 HSP90B1 HSPB1 IL4I1 ISG20 ITGA4 JUND KCNN3 LIMD1 LIMD2 LNPEP LOC253724 LOC646982 LPXN LRP10 LRRC33 LYL1 MAPK1 MAPRE2 MDM2 MYO1G NBN NCOR1 NDUFB7 NFKBIA…	ABR ACSF3 ACY3 ADNP AFF1 AKAP2 ALG5 APBB1IP ARHGAP31 ARHGDIB ARID3A ARMC8 ARPC5L ARRB2 ATP2A3 ATP6V1C1 B2M B3GNT2 B3GNT7 BCAS4 BRPF1 CCDC18 CCDC88C CCM2 CD79B CD83 CDK14 CELF2 CHST7 CIITA CNPY3 CXCR5 DGKA DLEU2 DLG2 DMD E2F1 EFCAB5 EFNA5 ERP29 ETV5 FAM13B FCRLA FLJ43663 GCET2 GGNBP2 HDAC9 HERPUD1 HIST1H4H HIVEP1 HSP90B1 HSPB1 ID2 IL4I1 ISG20 ITGA4 JMJD1C KCNN3 LIMD2 LNPEP LOC646982 LRP10 LRRC33 L…
ly1.promoter.BCL6-BCOR.all.2142	1.56993e-87	2.55117e-50	ABHD10 ACIN1 ACOT7 ACSF3 ACY3 ADAM22 ADCK5 ADIPOR2 ADNP ADPRHL1 AHSA2 AIM1 AKAP2 ALOX5 ANAPC13 ANG ANKRD12 ANLN APOLD1 ARF6 ARHGAP31 ARID1A ARID2 ARID3A ARID5A ARL1 ARL6IP1 ARMC5 ARMC8 ARPC5L ARRB2 ATAD2 ATAD2B ATG16L2 ATL2 ATL3 ATP2A3 ATP6V0B AZIN1 B2M B3GALNT2 B3GNT2 B4GALT5 BCAS4 BCL11A BCL2L11 BCOR BRCA2 BRPF1 BRWD1 BUD13 CAMK4 CAPN10 CBFA2T3 CBX3 CBX4 CCDC101 CCDC163P CCDC18 CCDC6 CCDC85B CC…	ABHD10 ABHD15 ABR ACIN1 ACSF2 ACSF3 ACY3 ADAM10 ADAM22 ADIPOR2 ADNP ADPRHL1 AEBP1 AFF1 AIM1 AKAP2 ALOX5 ANKRD11 ANKRD46 ANLN APBB1IP APOLD1 ARF6 ARHGAP24 ARHGAP31 ARID1A ARID2 ARID3A ARID5A ARL6IP1 ARMC8 ARPC5L ARRB2 ASB3 ATG16L2 ATG5 ATL2 ATP2A3 ATXN1 AUTS2 AZIN1 B2M B3GNT2 BACH2 BANF1 BANP BCAS4 BCL11A BCL2L11 BCOR BIK BRF1 BRPF1 BTG4 BUD13 CAMK4 CAPN10 CBFA2T3 CBX3 CBX4 CCDC18 CCDC6 CCDC88C CC…
ly1.promoter.BCL6-BCOR.only.1783	1.59452e-67	2.47581e-34	ABHD10 ACIN1 ACOT7 ADAM22 ADCK5 ADIPOR2 ADPRHL1 AHSA2 AIM1 ALOX5 ANAPC13 ANG ANKRD12 ANLN APOLD1 ARF6 ARID1A ARID2 ARID5A ARL6IP1 ATAD2 ATAD2B ATG16L2 ATL2 ATL3 ATP6V0B AZIN1 B3GALNT2 B4GALT5 BCL11A BCL2L11 BCOR BRCA2 BRWD1 BUD13 CAMK4 CAPN10 CBFA2T3 CBX3 CBX4 CCDC101 CCDC163P CCDC6 CCDC85B CCDC87 CCS CD99L2 CDC20 CDCA3 CDCA7L CDK5 CDKN2A CDKN2BAS CDKN2C CENPN CEP170 CEP57 CEP63 CEP76 CHCHD7 CHD1…	ABHD10 ABHD15 ACIN1 ACSF2 ADAM10 ADAM22 ADIPOR2 ADPRHL1 AEBP1 AIM1 ALOX5 ANKRD11 ANKRD46 ANLN APOLD1 ARF6 ARHGAP24 ARID1A ARID2 ARID5A ARL6IP1 ASB3 ATG16L2 ATG5 ATL2 ATXN1 AUTS2 AZIN1 BACH2 BANF1 BANP BCL11A BCL2L11 BCOR BIK BRF1 BTG4 BUD13 CAMK4 CAPN10 CBFA2T3 CBX3 CBX4 CCDC6 CD2AP CD38 CDCA7L CDK5RAP1 CDK6 CDKN1A CDKN2BAS CDKN2C CDYL CEP63 CEP97 CHCHD7 CHD1L CHD7 CHRAC1 CISH CITED2 CLASP1 CNR2 …
ly1.promoter.BCL6-SMRT.only.93		2.67912e-05	ALG5 E2F1 EFCAB5 EXOSC8 GCET2 IL4I1 NDUFB7 NR3C1 NT5C3 RBBP4 RGS1 RGS3 SLC44A2 SSH2 TSC1 ZBTB8OS	ALG5 ARHGDIB ATP6V1C1 B3GNT7 CDK14 CXCR5 DMD E2F1 EFCAB5 GCET2 IL4I1 JMJD1C LY9 MARCH1 NDUFB7 NR3C1 NT5C3 PPP1R16B PSMA6 RBBP4 RGS1 RGS3 SLC44A2 SLC7A11 TSC1 TXLNB ZBTB8OS
ly1.promoter.BCL6.alone.906	1.30329e-19	1.31939e-15	ABCB9 ACACA ACSL4 AIFM1 AKT1S1 ALG8 ANKRD13A ARHGAP1 ARL5B ARL6IP6 ARL8A ARMC1 ATP5G3 ATP6V1A BDH1 BUB3 BZW1 CAD CALR CALU CAP1 CCNG2 CD3EAP CD74 CELF1 CENPA CENPE CHCHD10 CNOT8 COG3 CSNK2A1 CTDSPL2 CYB5RL DAP3 DARS DBF4 DCK DEK DLEU1 DNAJB4 DNMT1 DUS3L DUSP10 DUT E2F5 EEA1 EEF2K EFCAB4B EIF4A3 EP300 ESPL1 EXO1 EZR FAM161A FANCL FANCM FKBP3 FLJ36031 GAPVD1 GATAD1 GBE1 GGCT GTDC1 GTPBP3 HAT1 HAUS8…	ABCG1 ADAMTS13 AKAP12 AKT1S1 ALG8 ALOX5AP ARHGAP1 ARL5B ARL6IP6 ARL8A ARMC1 ATP5G3 BCL2L1 BDH1 BNIP2 BTBD12 BUB3 CAD CALU CCDC69 CELF1 CENPA CENPE CHD2 CHRM5 COTL1 CRELD2 CSNK2A1 DAB2IP DCK DCTN4 DEK DFNB31 DNM2 DNMT1 DPEP2 DUS3L DUT DYM E2F5 EEA1 EEF2K EFCAB4B EIF2AK1 EIF4A3 ELF1 ESPL1 EVL EZR FAM100B FAM161A FAM53B FKBP3 GAPVD1 GATAD1 GATAD2B GGCT GIPC2 GLRX3 GRN GTDC1 GTPBP3 HAT1 HAUS8 HIST1H2…
ly1.enhancer.DISTAL.BCL6-SMRT.DRE.553	0.00138299	1.04989e-27	AKAP11 ARAP2 ARID1B AZIN1 B3GNT2 BCL11A BCL2L11 CDKN2C CIITA CLINT1 CNOT6L CSK CTDP1 CXCR4 DDX6 DTNBP1 DUSP10 DYRK2 EBF1 ETS1 ETS2 FBXO48 FCHSD2 FLJ36031 FLNB FPGS HERPUD2 HNRNPD HNRNPF IFNAR1 IRF2 ITPR2 KIAA1609 KLF2 KLHDC4 LBR LMO4 LOC100133612 LOC282997 LOC646982 MALT1 MAN1A1 MAX MBLAC1 MCM3 MIIP MIR148A MNS1 MRPL36 MRPL4 MSH6 NAIF1 NEIL3 NR3C2 OSBPL9 PARP1 PIM1 PITX1 PPIA PRDX6 PTGER4 RAB3IP …	ABR AKAP11 ANKRD46 ARAP2 ARID1B ARL4C ARPP21 ASAP1 AZIN1 B3GNT2 BACH2 BCAS1 BCL11A BCL2L11 BFSP2 BHLHE41 BTG4 CAPZB CD28 CD83 CDHR3 CDKN1A CDKN2C CHD2 CHD7 CHST15 CHSY1 CIITA CLINT1 CLLU1 CNOT6L CP CRB2 CSK CXCR4 CXCR5 DAD1 DERL3 DMXL1 DTNBP1 DYRK2 EBF1 EFNA5 ELOVL5 ETS1 ETS2 FAM102A FAM92B FAM9C FBXO15 FCHSD2 FGD4 FLNB FPGS GABARAPL1 GFOD1 GPM6A HDAC9 HERPUD2 HNRNPD HNRNPF ID2 IFNAR1 IKZF1 IKZF3…
ly1.enhancer.INTRONIC.BCL6-SMRT.DRE.807	1.52095e-07	1.19481e-72	ACBD3 ADA AIM1 AKAP2 AP1B1 ARID1A ARPC1B ATAD2B ATP6V1E1 ATXN10 BCL2L11 BRMS1L C2CD2 CAMK2D CAMK4 CAP1 CBLB CCDC6 CCDC88C CHST11 COPG CORO1C CSNK1G3 CTBP1 CYP20A1 DERL1 DRAM2 E2F5 E2F7 EBF1 EIF2AK3 EIF4H ESF1 ESR2 ETS1 EZR FAM120A FAM45A FCHSD2 FER FLJ37453 FLJ43663 FOXN3 FOXP1 GALNT2 GBAP1 GCN1L1 GLB1 GNAS GPR160 GTDC1 GTPBP1 HIF1A HPCAL1 IKBKB IQCD IRF2 IRS1 ITPR2 JAK1 KCTD5 KIAA0922 KIAA1731 L…	ABCC1 ABCG1 ABHD12B ABR ACBD3 ACOXL ADA ADARB1 ADARB2 AFF1 AFF2 AIM1 AIM2 AKAP2 ALOX5AP ANKRD11 AP1B1 APBB1IP ARHGAP24 ARHGAP26 ARHGDIB ARID1A ARPC1B ARSG ASAP1 ATP6V1E1 ATXN10 AUTS2 BACH2 BCL2L1 BCL2L11 BFSP2 BIK BRMS1L C2CD2 CABLES1 CACNA1C CADM1 CAMK2D CAMK4 CAPSL CBLB CCDC6 CCDC69 CCDC88C CDHR3 CDK14 CDK6 CELF2 CEP110 CHCHD3 CHD2 CHD7 CHST11 CMIP CORO1C CRAMP1L CRELD2 CRTC3 CSMD1 CTBP1 CUX1 C…
ly1.enhancer.INTRONIC.DISTAL.BCL6-SMRT.DRE.1275	6.84892e-10	6.97192e-91	ACBD3 ADA AIM1 AKAP11 AKAP2 AP1B1 ARAP2 ARID1A ARID1B ARPC1B ATAD2B ATP6V1E1 ATXN10 AZIN1 B3GNT2 BCL11A BCL2L11 BRMS1L C2CD2 CAMK2D CAMK4 CAP1 CBLB CCDC6 CCDC88C CDKN2C CHST11 CIITA CLINT1 CNOT6L COPG CORO1C CSK CSNK1G3 CTBP1 CTDP1 CXCR4 CYP20A1 DDX6 DERL1 DRAM2 DTNBP1 DUSP10 DYRK2 E2F5 E2F7 EBF1 EIF2AK3 EIF4H ESF1 ESR2 ETS1 ETS2 EZR FAM120A FAM45A FBXO48 FCHSD2 FER FLJ36031 FLJ37453 FLJ43663 FLN…	ABCC1 ABCG1 ABHD12B ABR ACBD3 ACOXL ADA ADARB1 ADARB2 AFF1 AFF2 AIM1 AIM2 AKAP11 AKAP2 ALOX5AP ANKRD11 ANKRD46 AP1B1 APBB1IP ARAP2 ARHGAP24 ARHGAP26 ARHGDIB ARID1A ARID1B ARL4C ARPC1B ARPP21 ARSG ASAP1 ATP6V1E1 ATXN10 AUTS2 AZIN1 B3GNT2 BACH2 BCAS1 BCL11A BCL2L1 BCL2L11 BFSP2 BHLHE41 BIK BRMS1L BTG4 C2CD2 CABLES1 CACNA1C CADM1 CAMK2D CAMK4 CAPSL CAPZB CBLB CCDC6 CCDC69 CCDC88C CD28 CD83 CDHR3 CDK…
GCB.promoter.BCL6.all.5541	5.49392e-307	2.59646e-134	AAAS AARS2 ABCB9 ABHD10 ACAA1 ACAD9 ACADSB ACIN1 ACOT7 ACSL4 ACTB ACY3 ADAM22 ADAT3 ADCK1 ADCK5 ADIPOR2 ADNP ADPRH AFTPH AHCTF1 AHSA2 AIFM1 AIM1 AKAP10 AKAP11 AKT1S1 ALDOA ALG5 ALG8 ALKBH4 AMD1 AMZ2 AMZ2P1 ANAPC13 ANG ANGEL2 ANKRD12 ANKRD13A ANKRD13D ANKRD33B ANKRD39 ANKS3 ANP32A ANP32E AP4B1 AP4M1 APC APLF APOLD1 APOO ARAP2 ARF6 ARFGAP2 ARHGAP1 ARHGAP31 ARID1A ARID1B ARID2 ARID3A ARID5A ARIH2 AR…	AARS2 ABCG1 ABHD10 ABHD15 ABLIM2 ABR ACAA1 ACAD9 ACIN1 ACTG1 ACY3 ADAM19 ADAM22 ADAMTS13 ADCK1 ADIPOR2 ADNP AEBP1 AFF1 AFTPH AIM1 AIM2 AKAP10 AKAP11 AKIRIN2 AKT1S1 ALDOA ALG5 ALG8 ALOX5AP AMZ2 ANGEL2 ANKRD11 ANKRD16 ANKRD39 ANKRD46 ANP32A APBB1IP APBB2 APOLD1 APOO APP ARAP2 ARF6 ARHGAP1 ARHGAP24 ARHGAP31 ARHGDIB ARID1A ARID1B ARID2 ARID3A ARID5A ARIH2 ARL16 ARL5B ARL6 ARL6IP1 ARL6IP6 ARL8B ARMC1 …
GCB.promoter.BCL6.SMRT.BCOR.1306	1.6434e-72	6.65347e-44	ABCB9 ACIN1 ACY3 ADNP AKAP10 ALDOA ALG5 AMZ2P1 ANKRD13D ANKRD33B AP4B1 ARF6 ARID1A ARID2 ARID3A ARID5A ARIH2 ARL1 ARL5B ARMC8 ARPC5L ASXL1 ATAD2 ATAD2B ATL2 ATP2A3 ATP5J ATXN2L AUP1 B3GALNT2 BCL2L11 BCOR BRIX1 BRPF1 BRWD1 BUD13 CAND1 CAP1 CAPN10 CBFA2T3 CBX3 CCDC76 CCDC77 CCDC88C CCM2 CCNG2 CCNL1 CD74 CDCA7L CDKN2A CDKN2BAS CENPJ CEP57 CEP76 CHAF1A CHST7 CIITA CITED2 CNOT6L CNPY3 COG3 CORO1A CPEB…	ABR ACIN1 ACY3 ADNP AFF1 AKAP10 ALDOA ALG5 ANKRD11 APBB1IP ARF6 ARHGAP24 ARID1A ARID2 ARID3A ARID5A ARIH2 ARL5B ARMC8 ARPC5L ASB3 ATL2 ATN1 ATP2A3 ATP5J BANF1 BCL2L11 BCOR BLK BNIP2 BRPF1 BUD13 CAND1 CAPN10 CARD11 CBFA2T3 CBX3 CCDC77 CCDC88C CCM2 CD28 CD2AP CD79B CDCA7L CDK14 CDKN1A CDKN2BAS CELF2 CENPJ CHAF1A CHCHD3 CHMP4B CHST7 CIITA CITED2 CLASP1 CNOT6L CNPY3 CNR2 CORO1A CTAGE5 CUL4B CXCR5 CYB…
GCB.promoter.BCL6-SMRT.all.1306	1.6434e-72	6.65347e-44	ABCB9 ACIN1 ACY3 ADNP AKAP10 ALDOA ALG5 AMZ2P1 ANKRD13D ANKRD33B AP4B1 ARF6 ARID1A ARID2 ARID3A ARID5A ARIH2 ARL1 ARL5B ARMC8 ARPC5L ASXL1 ATAD2 ATAD2B ATL2 ATP2A3 ATP5J ATXN2L AUP1 B3GALNT2 BCL2L11 BCOR BRIX1 BRPF1 BRWD1 BUD13 CAND1 CAP1 CAPN10 CBFA2T3 CBX3 CCDC76 CCDC77 CCDC88C CCM2 CCNG2 CCNL1 CD74 CDCA7L CDKN2A CDKN2BAS CENPJ CEP57 CEP76 CHAF1A CHST7 CIITA CITED2 CNOT6L CNPY3 COG3 CORO1A CPEB…	ABR ACIN1 ACY3 ADNP AFF1 AKAP10 ALDOA ALG5 ANKRD11 APBB1IP ARF6 ARHGAP24 ARID1A ARID2 ARID3A ARID5A ARIH2 ARL5B ARMC8 ARPC5L ASB3 ATL2 ATN1 ATP2A3 ATP5J BANF1 BCL2L11 BCOR BLK BNIP2 BRPF1 BUD13 CAND1 CAPN10 CARD11 CBFA2T3 CBX3 CCDC77 CCDC88C CCM2 CD28 CD2AP CD79B CDCA7L CDK14 CDKN1A CDKN2BAS CELF2 CENPJ CHAF1A CHCHD3 CHMP4B CHST7 CIITA CITED2 CLASP1 CNOT6L CNPY3 CNR2 CORO1A CTAGE5 CUL4B CXCR5 CYB…
GCB.promoter.BCL6-BCOR.all.5451	9.07166e-304	1.94409e-129	AAAS AARS2 ABCB9 ABHD10 ACAA1 ACAD9 ACADSB ACIN1 ACOT7 ACSL4 ACTB ACY3 ADAM22 ADAT3 ADCK1 ADCK5 ADIPOR2 ADNP ADPRH AFTPH AHCTF1 AHSA2 AIFM1 AIM1 AKAP10 AKAP11 ALDOA ALG5 ALG8 ALKBH4 AMD1 AMZ2 AMZ2P1 ANAPC13 ANG ANGEL2 ANKRD12 ANKRD13A ANKRD13D ANKRD33B ANKRD39 ANKS3 ANP32A ANP32E AP4B1 AP4M1 APC APLF APOLD1 APOO ARAP2 ARF6 ARFGAP2 ARHGAP1 ARHGAP31 ARID1A ARID1B ARID2 ARID3A ARID5A ARIH2 ARL1 ARL1…	AARS2 ABCG1 ABHD10 ABHD15 ABLIM2 ABR ACAA1 ACAD9 ACIN1 ACTG1 ACY3 ADAM19 ADAM22 ADAMTS13 ADCK1 ADIPOR2 ADNP AEBP1 AFF1 AFTPH AIM1 AKAP10 AKAP11 AKIRIN2 ALDOA ALG5 ALG8 ALOX5AP AMZ2 ANGEL2 ANKRD11 ANKRD16 ANKRD39 ANKRD46 ANP32A APBB1IP APBB2 APOLD1 APOO APP ARAP2 ARF6 ARHGAP1 ARHGAP24 ARHGAP31 ARHGDIB ARID1A ARID1B ARID2 ARID3A ARID5A ARIH2 ARL16 ARL5B ARL6 ARL6IP1 ARL6IP6 ARL8B ARMC1 ARMC8 ARPC5L…
GCB.promoter.BCL6-BCOR.only.4145	1.19527e-187	1.2418e-70	AAAS AARS2 ABHD10 ACAA1 ACAD9 ACADSB ACOT7 ACSL4 ACTB ADAM22 ADAT3 ADCK1 ADCK5 ADIPOR2 ADPRH AFTPH AHCTF1 AHSA2 AIFM1 AIM1 AKAP11 ALG8 ALKBH4 AMD1 AMZ2 ANAPC13 ANG ANGEL2 ANKRD12 ANKRD13A ANKRD39 ANKS3 ANP32A ANP32E AP4M1 APC APLF APOLD1 APOO ARAP2 ARFGAP2 ARHGAP1 ARHGAP31 ARID1B ARL16 ARL3 ARL6IP1 ARL6IP4 ARL6IP6 ARMC1 ARMC5 ARRB2 ASPM ASXL2 ATAD5 ATF2 ATF4 ATG16L2 ATG2A ATIC ATP2A2 ATP6V0B ATP6…	AARS2 ABCG1 ABHD10 ABHD15 ABLIM2 ACAA1 ACAD9 ACTG1 ADAM19 ADAM22 ADAMTS13 ADCK1 ADIPOR2 AEBP1 AFTPH AIM1 AKAP11 AKIRIN2 ALG8 ALOX5AP AMZ2 ANGEL2 ANKRD16 ANKRD39 ANKRD46 ANP32A APBB2 APOLD1 APOO APP ARAP2 ARHGAP1 ARHGAP31 ARHGDIB ARID1B ARL16 ARL6 ARL6IP1 ARL6IP6 ARL8B ARMC1 ARRB2 ARSB ASXL2 ATG16L2 ATG2A ATP2A2 ATP6V1C1 ATXN1 AURKA AZIN1 B2M B3GNT7 BACH2 BAG5 BANP BARD1 BAX BAZ1A BCAS4 BCL11A BCL…
GCB.promoter.BCL6.alone.106	0.0128896	0.000177054	AKT1S1 BTBD19 CASP8AP2 CDKN3 COX8A EIF4A1 GLTSCR2 GOLGA1 IL23A ISG20 LASS2 LNPEP LOC100133612 MAPRE2 MYBPC2 PCNT PRKACB PTBP1 PTPN7 SEL1L3 SNRPA TBC1D17 TOM1 WDR13	AIM2 AKT1S1 BTBD19 CASP8AP2 CDKN3 COX8A EIF4A1 GOLGA1 ISG20 KDM4B LARP1 LASS2 LDB1 LDB3 LNPEP LOC100133612 MAPRE2 MYBPC2 PCNT PDE4B PTPN7 SEL1L3 SELL SLAMF1 SNRPA SUCNR1 TOM1 ZNF236
IKAROS_target_ChIPseq_Young_Ebert_Cell_11	7.1543e-36	1.70619e-29	AAAS ACTL6A AIMP2 ALOX5 ANKMY1 ANKRD49 AP4M1 APAF1 APEH ARHGAP1 ARL1 ATF2 ATF5 ATIC ATP6V1E1 AUP1 B4GALT2 BAZ1A BRPF1 BTK CBFA2T3 CCDC85B CCHCR1 CD2BP2 CDC7 CENPJ CENPM CENPO CEP76 CHEK1 CNPY3 CPEB3 CRKL CTBP1 CTDSP2 CUL4B CYP20A1 DARS DBI DCLRE1C DDX28 DERL1 DHFR DUS2L DUSP12 EFCAB2 EGLN2 EGR1 EIF2B4 EIF3A EIF4G2 ENY2 EPC1 ERC1 ERI2 ETS1 ETS2 EZR FAM120A FAM49B FANCL FBXO28 FIP1L1 FRAT2 FUBP3 GA…	ACTG1 ACTL6A ACVR1 ADAM10 ADAP1 AGPAT2 ALOX5 ARHGAP1 ATN1 ATP6V1E1 B4GALT2 BAHCC1 BAZ1A BHLHE40 BRPF1 BTK CBFA2T3 CD2BP2 CDC7 CENPJ CENPM CEP110 CHEK1 CLCN5 CNPY3 COBLL1 CTBP1 CTDSP2 CUL4B CUX1 CYP20A1 D4S234E DBI DCLRE1C DERL1 DR1 DUS2L EFCAB2 EGLN2 EGR1 EIF3A ENG ENY2 EPC1 ERC1 ETS1 ETS2 ETV6 EZR FAM176B FARS2 FBXO28 FHIT FRMD4B FUBP3 GABPB1 GADD45B GATAD1 GFI1 GNA15 GSTCD GSTO1 GSTP1 GTF3C4 HI…
MEIS1_target_ChIPseq_Ebert_Cell_11	0.000217426	3.61029e-16	AARSD1 AGPAT1 AMZ2 APIP APOLD1 ATAD2B ATP5S ATXN10 ATXN7 BCL11A BIN3 CARHSP1 CASD1 CBLB CCDC109B CHCHD2 CORO1C CREB3L2 CSK CXCR4 DCLRE1C DHFR DPYD EIF3K ERBB2IP ETS1 FANCC FANCG FBXO31 FIP1L1 FLNB FOXN3 FOXP1 FPGS GAPVD1 GBE1 GMFG GNA13 GSK3B ING3 KIAA0947 KTN1 LPXN LRBA LRCH1 LRCH3 LRP6 LSM14A LYL1 MAN2A1 MAP3K5 MAP4K1 MBNL3 MBP MSH3 MTX2 MYO9B NAGK NOTCH2NL NUP98 OXCT1 PARN PIH1D1 PRCP PRKCE PR…	ABCC1 AFF1 AKAP9 AMZ2 APIP APOLD1 ARHGAP24 ARHGAP26 ARPP21 ASAP1 ATXN10 BACH2 BCL11A BIN3 BLK CARHSP1 CASD1 CBLB CCDC109B CD244 CD83 CDK6 CHCHD2 CORO1C CREB3L2 CROCC CSK CXCR4 DAPK1 DCLRE1C DMD DOCK10 DPYD DTNB EGF ENOSF1 EPB41L1 ETS1 FANCC FARS2 FBXO31 FHIT FLNB FNBP1 FOXN3 FOXP1 FPGS GAPVD1 GLG1 GNA12 HIP1 HIPK2 IFNAR2 IGF2BP3 IL1B JMJD1C KAT2B KIAA0232 KIAA0240 KTN1 LPAR3 LPIN1 LRBA LRCH1 MACF…
TAL1_target_ChIPseq_Ebert_Cell_11		0.000544408	BNIP3L CBFA2T3 CCND3 ETS1 LYL1 MAPK14 NFATC1 PARN RPS6KA2 SCAMP2 SH2B3 SLBP SLC1A5	ANKRD55 BNIP3L CBFA2T3 CCND3 ETS1 ETV5 FLT1 GLG1 GNA12 MAPK14 NFATC1 PARN PMF1 PTPRD RPS6KA2 RUNX1 SH2B3 ZDHHC14
PU.1_target_ChIPseq_Ebert_Cell_11	9.2256e-44	1.78981e-83	AAAS AARSD1 ABCD3 ACAA1 ACACA ACTB ACTL6A ACVR1B ADA ADK AFTPH AGPAT1 AGTPBP1 AIM1 AK2 AKAP10 AKAP11 ALDOA ALG5 ALOX5 AMZ2 ANG ANKMY1 ANKRD12 ANP32A AP1B1 APC ARAP2 ARHGAP1 ARHGAP19 ARID3A ARID5A ARL1 ARL3 ARNT ARPC1B ARPC5L ARRB2 ASH2L ASXL1 ASXL2 ATAD2B ATF2 ATF5 ATL2 ATP2A3 ATP5J ATP6V0B ATP6V1A ATXN10 ATXN2 ATXN7 AUP1 AVEN AZIN1 B2M B3GNT2 B4GALT2 BAX BAZ1A BCL2L11 BCOR BIN3 BLCAP BNIP3L BRCA…	ABCC1 ABCG1 ABR ACAA1 ACTL6A ACVR1B ADA ADAM10 ADAM19 ADAP1 ADARB1 ADK ADORA1 AEBP1 AFF1 AFF2 AFTPH AGPAT2 AGTPBP1 AIM1 AIM2 AK2 AKAP10 AKAP11 AKAP9 AKT1 ALDOA ALG5 ALOX5 ALOX5AP AMZ2 ANKRD11 ANKRD55 ANP32A AP1B1 APBB1IP APP ARAP2 ARHGAP1 ARHGAP19 ARHGAP24 ARHGAP26 ARHGDIB ARID3A ARID5A ARPC1B ARPC5L ARPP21 ARRB2 ASAP1 ASXL2 ATL2 ATN1 ATP2A3 ATP5J ATP6V1C1 ATP8A2 ATXN1 ATXN10 ATXN2 AUTS2 AVEN AZI…
PU.1_NB_prom	1.0163e-109	4.24214e-64	ABHD11 ABL1 ACAA1 ACAA2 ACBD3 ACO2 ACSL4 ACTB ACY3 ADAT3 ADPRH ADSS AFTPH AGTPBP1 AHCYL1 AIP AKAP10 AKAP11 AKT1S1 ALDH16A1 ALG5 ALOX5 ANAPC13 ANG ANKLE1 ANKRD13A ANLN ANP32A ANP32B ANP32E AP1B1 AP4B1 AP4M1 APIP APLF ARF6 ARHGAP1 ARHGAP31 ARID3A ARID5A ARIH2 ARL16 ARL5B ARL6IP1 ARL6IP6 ARL8A ARMC5 ARRB2 ASF1B ASXL1 ATAD2B ATG16L2 ATP13A1 ATP2A3 ATP5J ATP6V0B ATP6V1A ATP6V1E1 ATXN10 AVEN AZIN1 B2M …	ABCG1 ABHD11 ACAA1 ACAA2 ACBD3 ACY3 ADARB2 ADRBK1 ADSS AEBP1 AFTPH AGPAT2 AGTPBP1 AHCYL1 AIP AKAP10 AKAP11 AKT1S1 ALG5 ALOX5 ALOX5AP ALPK1 ANKLE1 ANKRD11 ANLN ANP32A ANP32B AP1B1 APBB1IP APIP ARF6 ARHGAP1 ARHGAP24 ARHGAP31 ARHGDIB ARID3A ARID5A ARIH2 ARL16 ARL5B ARL6IP1 ARL6IP6 ARL8A ARPP21 ARRB2 ARSB ATG16L2 ATG5 ATP13A1 ATP2A3 ATP5J ATP6V1E1 ATXN10 AVEN AZIN1 B2M BAG5 BANF1 BAZ1A BCL11A BCL2L11…
PU.1_NB_enhancer	5.04722e-43	8.35784e-184	ABCD1 ABHD11 ABL1 ACACA ACBD3 ACO2 ACSF3 ACSL4 ACTB ACVR1B ACY3 ADA ADK ADPRH AFTPH AGTPBP1 AHCYL1 AIM1 AIP AK2 AKAP11 AKAP2 AKT1S1 ALDH16A1 ALG5 ALOX5 AMD1 AMMECR1 AMZ2 AMZ2P1 ANG ANKRD12 ANKRD13A ANKRD33B ANLN ANP32A ANP32B ANP32E ANXA11 ANXA5 AP1B1 AP1M1 AP4B1 APAF1 APC APIP APOBEC3G APOO ARAP2 ARF1 ARF6 ARFGAP3 ARGLU1 ARHGAP31 ARID1A ARID1B ARID3A ARID5A ARL6IP1 ARL6IP6 ARL8A ARNT ARPC1B ARPC…	AACS ABCC1 ABCC8 ABCD1 ABCG1 ABHD11 ABHD12B ABHD15 ABR ACBD3 ACOXL ACSBG2 ACSF3 ACTG1 ACVR1B ACY3 ADA ADAM19 ADAMTS13 ADAMTS7 ADAP1 ADARB1 ADARB2 ADK ADRBK1 AEBP1 AFF1 AFF2 AFTPH AGTPBP1 AHCYL1 AIM1 AIM2 AIP AK1 AK2 AKAP11 AKAP2 AKAP9 AKIRIN2 AKNA AKT1S1 ALG5 ALOX5 ALOX5AP AMMECR1 AMZ2 ANKRD11 ANKRD16 ANKRD46 ANLN ANP32A ANP32B ANXA11 ANXA4 AP1B1 AP1M1 APBB1IP APBB2 APCDD1 APIP APOBEC3G APOF APOO…
PU.1_NB_all	4.91562e-91	1.02737e-193	ABCD1 ABHD11 ABL1 ACAA1 ACAA2 ACACA ACBD3 ACO2 ACSF3 ACSL4 ACTB ACVR1B ACY3 ADA ADAM22 ADAT3 ADK ADPRH ADSS AFTPH AGTPBP1 AHCYL1 AIM1 AIP AK2 AKAP10 AKAP11 AKAP2 AKAP8L AKT1S1 ALDH16A1 ALG5 ALOX5 AMD1 AMMECR1 AMZ2 AMZ2P1 ANAPC13 ANG ANKLE1 ANKRD12 ANKRD13A ANKRD33B ANLN ANP32A ANP32B ANP32E ANXA11 ANXA5 AP1B1 AP1M1 AP4B1 AP4M1 APAF1 APC APIP APLF APOBEC3G APOO ARAP2 ARF1 ARF6 ARFGAP3 ARGLU1 ARHGA…	AACS ABCC1 ABCC8 ABCD1 ABCG1 ABHD11 ABHD12B ABHD15 ABR ACAA1 ACAA2 ACBD3 ACOXL ACSBG2 ACSF3 ACTG1 ACVR1B ACY3 ADA ADAM19 ADAM22 ADAMTS13 ADAMTS7 ADAP1 ADARB1 ADARB2 ADK ADRBK1 ADSS AEBP1 AFF1 AFF2 AFTPH AGPAT2 AGTPBP1 AHCYL1 AIM1 AIM2 AIP AK1 AK2 AKAP10 AKAP11 AKAP2 AKAP8L AKAP9 AKIRIN2 AKNA AKT1S1 ALG5 ALOX5 ALOX5AP ALPK1 AMMECR1 AMZ2 ANKLE1 ANKRD11 ANKRD16 ANKRD46 ANLN ANP32A ANP32B ANXA11 ANXA…
PU.1_CB_prom	3.406e-91	1.20171e-59	ABHD11 ABL1 ACAA1 ACAA2 ACSL4 ACY3 ADAT3 ADPRH AFTPH AHCYL1 AKAP10 AKT1S1 ALDH16A1 ALG5 ALOX5 ANG ANKLE1 ANKRD13A ANLN ANP32A ANP32B ANP32E AP1B1 AP4B1 AP4M1 APLF ARF6 ARHGAP1 ARHGAP31 ARID3A ARID5A ARIH2 ARL6IP1 ARL6IP6 ARMC5 ASF1B ATAD2B ATG16L2 ATP13A1 ATP2A3 ATP5J ATP6V0B ATP6V1A ATP6V1E1 ATXN10 B2M BAZ1A BCL11A BCL2L11 BET1L BLM BNIP3L BRCA2 BRIX1 BSG BSPRY BTBD19 BTK BUB1B BZW1 CA5BP CABC1 …	ABCC1 ABCG1 ABHD11 ABR ACAA1 ACAA2 ACY3 ADAMTS13 AEBP1 AFTPH AGPAT2 AHCYL1 AKAP10 AKT1S1 ALG5 ALOX5 ALOX5AP ANKLE1 ANKRD11 ANLN ANP32A ANP32B AP1B1 APBB1IP ARF6 ARHGAP1 ARHGAP24 ARHGAP31 ARHGDIB ARID3A ARID5A ARIH2 ARL6IP1 ARL6IP6 ARPP21 ARSB ATG16L2 ATG5 ATN1 ATP13A1 ATP2A3 ATP5J ATP6V1C1 ATP6V1E1 ATXN10 B2M BANF1 BAZ1A BCL11A BCL2L11 BET1L BLK BLM BNIP2 BNIP3L BSG BSPRY BTBD12 BTBD19 BTK BUB1B …
PU.1_CB_enhancer	6.36981e-35	7.22678e-169	ABCD1 ABHD11 ABL1 ACBD3 ACO2 ACSF3 ACSL4 ACTB ACY3 ADA ADAM15 ADK ADPRH AFMID AFTPH AGTPBP1 AHCYL1 AK2 AKAP11 AKAP2 ALDH16A1 ALG5 ALOX5 AMMECR1 AMZ2 AMZ2P1 ANG ANKRD13A ANKRD33B ANLN ANP32A ANP32B ANP32E ANXA11 ANXA5 AP1B1 AP1M1 APAF1 APC APIP APOO ARAP2 ARF1 ARF6 ARFGAP3 ARGLU1 ARHGAP31 ARID1A ARID1B ARID3A ARID5A ARL6IP1 ARL6IP6 ARNT ARPC1B ASH2L ASXL1 ATAD2B ATG16L2 ATL2 ATP13A1 ATP2A2 ATP2A3 …	AACS ABCC1 ABCC8 ABCD1 ABCG1 ABHD11 ABHD12B ABR ACBD3 ACOXL ACSBG2 ACSF3 ACTG1 ACY3 ADA ADAM15 ADAM19 ADAMTS13 ADAMTS7 ADAP1 ADARB1 ADK AEBP1 AFF1 AFF2 AFTPH AGTPBP1 AHCYL1 AIM2 AK1 AK2 AKAP11 AKAP2 AKAP9 AKNA ALG5 ALOX5 ALOX5AP ALPI AMMECR1 AMZ2 ANKRD11 ANKRD16 ANKRD46 ANLN ANP32A ANP32B ANXA11 ANXA4 AP1B1 AP1M1 APBB1IP APIP APOO APP ARAP2 ARF1 ARF6 ARFGAP3 ARHGAP24 ARHGAP26 ARHGAP31 ARHGDIB ARI…
PU.1_CB_all	1.26116e-75	1.98869e-173	ABCD1 ABHD11 ABL1 ACAA1 ACAA2 ACACA ACBD3 ACO2 ACSF3 ACSL4 ACTB ACY3 ADA ADAM15 ADAT3 ADK ADPRH AFMID AFTPH AGTPBP1 AHCYL1 AIM1 AK2 AKAP10 AKAP11 AKAP2 AKT1S1 ALDH16A1 ALG5 ALOX5 AMMECR1 AMZ2 AMZ2P1 ANG ANKLE1 ANKRD13A ANKRD33B ANLN ANP32A ANP32B ANP32E ANXA11 ANXA5 AP1B1 AP1M1 AP4B1 AP4M1 APAF1 APC APIP APLF APOO ARAP2 ARF1 ARF6 ARFGAP3 ARGLU1 ARHGAP1 ARHGAP31 ARID1A ARID1B ARID2 ARID3A ARID5A A…	AACS ABCC1 ABCC8 ABCD1 ABCG1 ABHD11 ABHD12B ABHD15 ABR ACAA1 ACAA2 ACBD3 ACOXL ACSBG2 ACSF3 ACTG1 ACY3 ADA ADAM15 ADAM19 ADAMTS13 ADAMTS7 ADAP1 ADARB1 ADK AEBP1 AFF1 AFF2 AFTPH AGPAT2 AGTPBP1 AHCYL1 AIM1 AIM2 AK1 AK2 AKAP10 AKAP11 AKAP2 AKAP9 AKNA AKT1S1 ALG5 ALOX5 ALOX5AP ALPI AMMECR1 AMZ2 ANKLE1 ANKRD11 ANKRD16 ANKRD46 ANLN ANP32A ANP32B ANXA11 ANXA4 AP1B1 AP1M1 APBB1IP APIP APOF APOO APP ARAP2…
IKZF1_CB_prom	8.16364e-36	1.92622e-17	AAAS ACTL6A ACY3 AIM1 AMZ2P1 ANGEL2 AP4B1 ARHGAP1 ARID1A ATAD2 ATAD2B ATP5G2 ATXN2L AUP1 B3GALNT2 BAZ1A BLM BRIX1 BRPF1 BTF3L4 CCDC114 CCDC122 CCDC163P CCDC77 CCDC85B CD2BP2 CDK1 CDK13 CENPM CENPT CFL1 CHCHD10 CHD1L CNPY3 CPEB2 CRKL CTDSP2 CTDSPL2 CYBA DARS DCAF17 DCLRE1B DDX20 DDX55 DHX33 DLEU1 DLST DUSP12 DUSP2 DYNLL1 EDEM3 EFCAB6 EGR1 EIF2B4 ELL3 ERC1 ESR2 FAM119A FAM120A FAM120AOS FBXO28 FCRL…	ABR ACTL6A ACVR1 ACY3 ADAM10 AIM1 ANGEL2 ANKRD16 APBB2 ARHGAP1 ARID1A ATP5G2 BAZ1A BIK BLM BRPF1 BTF3L4 CCDC122 CCDC77 CD2BP2 CDK1 CENPM CENPT CFL1 CHD1L CNPY3 CNR2 CTDSP2 CYBA DHX33 DNM2 DR1 DSCR3 DUSP2 EARS2 EDEM3 EGR1 ELL3 ERC1 FAM119A FAM120AOS FAM129C FBXO18 FBXO28 FCRLA FUT8 GABPB1 GADD45B GGNBP2 GNB2 GOLGA1 GSTCD GTF3C5 HIST1H2BD HMBOX1 HNRNPUL1 HSPH1 HTRA2 ICOSLG IDE IER2 IFI6 IFNAR1 IMPA…
IKZF1_CB_enhancer	7.63926e-12	2.42107e-51	ACSF3 ACY3 ANGEL2 ANKRD33B AP1M1 ARFGAP3 ARHGAP31 ARID1A ATXN2L BAZ1A BCOR BLM CCDC122 CCDC6 CCND3 CD81 CENPM CENPT COG8 CSK CXXC5 DBNL DNAJB12 DNAJC17 DUS3L DUSP10 DYNLL1 ELL3 FAM120A FAM167A FBXO31 GGNBP2 GNG7 HERPUD1 HIF1A HMGB1 ICOSLG IL10RA IQSEC1 KLHDC4 KPNB1 LCK LOC646982 LOC729991-MEF2B LRRC8D MAN1A1 MAPK1 MAST3 MED29 METTL8 MFNG MFSD8 MIR142 MOBKL2A MTIF3 NBN NDUFC1 NEIL1 NFATC2IP NFATC4…	ABR ACSF3 ACY3 AKNA ANGEL2 AP1M1 APBB2 ARFGAP3 ARHGAP31 ARID1A BAZ1A BCAS1 BCOR BIK BLM CACNA2D4 CARS2 CCDC12 CCDC122 CCDC6 CCDC69 CCND3 CD81 CD83 CDH23 CDK11B CENPM CENPT CHD2 CMIP CNR2 COG8 CRB2 CRELD2 CSK CUX1 CXXC5 DAD1 DBNL DDIT4 DGKG DLEU2 DLG2 DNAJB12 DNAJC17 DTNB DUS3L ELL3 ENAH EPS15L1 ERCC1 FAM65A FBXO31 FUT8 GGNBP2 GLDC GNG7 GRB7 HERPUD1 HIF1A HMGB1 ICOSLG IER2 IKZF1 IKZF3 INF2 INPP5D …
IKZF1_CB_all	7.6581e-38	7.99958e-49	AAAS ACSF3 ACTL6A ACY3 AIM1 AMZ2P1 ANGEL2 ANKRD33B AP1M1 AP4B1 ARFGAP3 ARHGAP1 ARHGAP31 ARID1A ATAD2 ATAD2B ATP5G2 ATXN2L AUP1 B3GALNT2 BAZ1A BCOR BLM BRIX1 BRPF1 BTF3L4 CCDC114 CCDC122 CCDC163P CCDC6 CCDC77 CCDC85B CCND3 CD2BP2 CD81 CDK1 CDK13 CENPM CENPT CFL1 CHCHD10 CHD1L CNPY3 COG8 CPEB2 CRKL CSK CTDSP2 CTDSPL2 CXXC5 CYBA DARS DBNL DCAF17 DCLRE1B DDX20 DDX55 DHX33 DLEU1 DLST DNAJB12 DNAJC17 D…	ABR ACSF3 ACTL6A ACVR1 ACY3 ADAM10 AIM1 AKNA ANGEL2 ANKRD16 AP1M1 APBB2 APOF ARFGAP3 ARHGAP1 ARHGAP31 ARID1A ATP5G2 BAZ1A BCAS1 BCOR BIK BLM BRPF1 BTF3L4 CACNA2D4 CARS2 CCDC12 CCDC122 CCDC6 CCDC69 CCDC77 CCND3 CD247 CD2BP2 CD79B CD81 CD83 CDH23 CDK1 CDK11B CENPM CENPT CFL1 CHD1L CHD2 CMIP CNPY3 CNR2 COG8 CRB2 CRELD2 CSK CTDSP2 CUX1 CXXC5 CYBA DAD1 DBNL DDIT4 DGKG DHX33 DLEU2 DLG2 DNAJB12 DNAJC17 …
CTCF_NB_prom	2.30261e-38	1.42159e-21	AAAS AARS2 ABHD14A ABHD14B ACAT1 ACTB ACTL6A ACY1 ADAM15 ADCK5 ADNP AFTPH AHCYL1 AKAP8L ALDOA ALG13 ALG5 ANKLE1 ANKMY1 ANKRD13D ANKRD39 ANP32B AP4B1 APOO ARFGAP2 ARID2 ARL3 ARL6IP1 ARMC5 ARRB2 ASF1B ATAD2B ATG16L2 ATL3 ATP5G2 ATP6V1A AZIN1 B3GALNT2 BCAS4 BRP44L C1GALT1 CACYBP CASP7 CBFA2T3 CBX4 CCDC114 CCDC142 CCDC58 CCDC6 CCDC85B CCDC87 CCDC88C CCDC99 CCNL2 CCS CD3EAP CD58 CDC25B CDC7 CDCA8 CDK1…	AARS2 ABHD14B ABHD15 ABR ACAT1 ACTL6A ADAM15 ADAMTS16 ADAMTS7 ADNP ADRBK1 AFTPH AHCYL1 AKAP12 AKAP8L ALDOA ALG13 ALG5 ANKLE1 ANKRD39 ANKRD46 ANP32B APBA1 APOO APP ARID2 ARL6IP1 ARL8B ARRB2 ATG16L2 ATN1 ATP5G2 ATXN1 AZIN1 BACH2 BANP BCAS4 BCL2L1 BHLHE40 BNIP2 C1GALT1 CACYBP CASP7 CAV1 CBFA2T3 CBX4 CCDC6 CCDC88C CCDC99 CCL1 CD58 CDC25B CDC7 CDCA8 CDH23 CDK14 CDK6 CDK9 CDKN1A CDKN2C CELF1 CELF2 CENP…
CTCF_NB_enhancer	4.14332e-12	4.47162e-86	AARS2 AARSD1 ABCB9 ABCD3 ABHD10 ABL1 ACACA ACADSB ACBD3 ACIN1 ACO2 ACOT7 ACSL4 ACTB ACTL6A ACVR1B ACY3 ADAM15 ADCK1 ADK ADNP ADPRHL1 AFTPH AGTPBP1 AHCYL1 AIFM1 AIM1 AK2 AK7 AKAP10 AKAP2 ALDOA ALG5 AMD1 AMMECR1 AMZ2P1 ANAPC13 ANAPC4 ANG ANGEL2 ANKMY1 ANKRD27 ANKRD33B ANKRD49 ANP32A ANP32B ANP32E ANXA11 ANXA5 AOX2P AP1B1 AP1M1 AP4S1 APAF1 APC APIP APLF APOO ARF6 ARFGAP3 ARHGAP19 ARHGAP31 ARID1A ARI…	AACS AARS2 ABCC1 ABCC6 ABCG1 ABHD10 ABHD12B ABLIM2 ABR ACBD3 ACIN1 ACOXL ACSBG2 ACTG1 ACTL6A ACVR1B ACY3 ADAM15 ADAMTS16 ADAMTS7 ADAP1 ADARB1 ADARB2 ADCK1 ADCY10 ADK ADNP ADPRHL1 ADRBK1 AFF1 AFF2 AFTPH AGTPBP1 AHCYL1 AHDC1 AIM1 AIM2 AK1 AK2 AKAP10 AKAP12 AKAP2 AKAP4 AKNA ALDOA ALG5 ALOX5AP ALPI ALPK1 AMMECR1 ANAPC4 ANGEL2 ANKRD11 ANKRD16 ANKRD27 ANKRD46 ANKRD55 ANP32A ANP32B ANTXRL ANXA11 ANXA4 A…
CTCF_NB_all	3.1066e-34	4.04386e-99	AAAS AARS2 AARSD1 ABCB9 ABCD3 ABHD10 ABHD14A ABHD14B ABL1 ACACA ACADSB ACAT1 ACBD3 ACIN1 ACO2 ACOT7 ACSL4 ACTB ACTL6A ACVR1B ACY1 ACY3 ADAM15 ADCK1 ADCK5 ADK ADNP ADPRHL1 AFTPH AGTPBP1 AHCYL1 AIFM1 AIM1 AK2 AK7 AKAP10 AKAP2 AKAP8L ALDH16A1 ALDOA ALG13 ALG5 AMD1 AMMECR1 AMZ2P1 ANAPC13 ANAPC4 ANG ANGEL2 ANKLE1 ANKMY1 ANKRD13D ANKRD27 ANKRD33B ANKRD39 ANKRD49 ANP32A ANP32B ANP32E ANXA11 ANXA5 AOX2P …	AACS AARS2 ABCC1 ABCC6 ABCG1 ABHD10 ABHD12B ABHD14B ABHD15 ABLIM2 ABR ACAT1 ACBD3 ACIN1 ACOXL ACSBG2 ACTG1 ACTL6A ACVR1B ACY3 ADAM15 ADAM19 ADAMTS16 ADAMTS7 ADAP1 ADARB1 ADARB2 ADCK1 ADCY10 ADK ADNP ADPRHL1 ADRBK1 AFF1 AFF2 AFTPH AGTPBP1 AHCYL1 AHDC1 AIM1 AIM2 AK1 AK2 AKAP10 AKAP12 AKAP2 AKAP4 AKAP8L AKNA AKT1 ALDOA ALG13 ALG5 ALOX5AP ALPI ALPK1 AMMECR1 ANAPC4 ANGEL2 ANKLE1 ANKRD1 ANKRD11 ANKRD16…
CTCF_CB_prom	1.17036e-26	4.21281e-18	AAAS AARS2 ABHD14A ABHD14B ACAT1 ACTB ACTL6A ACY1 ADAM15 ADCK5 ADNP AFTPH AHCYL1 AKAP8L ALG13 ALG5 ANKLE1 ANKMY1 ANKRD39 ANP32B APOO ARFGAP2 ARID2 ARL3 ARL6IP1 ARL6IP6 ARMC5 ASF1B ATAD2B ATG16L2 ATP5G2 ATP5S ATP6V1A AZIN1 B3GALNT2 BCAS4 BRP44L C1GALT1 CACYBP CASP7 CBFA2T3 CBX4 CCDC114 CCDC142 CCDC18 CCDC58 CCDC6 CCDC85B CCDC87 CCDC88C CCDC99 CCS CD3EAP CD58 CDC25B CDCA8 CDK12 CDK5RAP3 CDK9 CELF1 …	AARS2 ABHD14B ABR ACAT1 ACTL6A ADAM15 ADAMTS16 ADAMTS7 ADNP ADRBK1 AFTPH AHCYL1 AKAP12 AKAP8L ALG13 ALG5 ANKLE1 ANKRD39 ANKRD46 ANP32B APBA1 APBB2 APOO APP ARID2 ARL6IP1 ARL6IP6 ARL8B ATG16L2 ATN1 ATP5G2 ATP6V1C1 ATXN1 AZIN1 B3GNT7 BACH2 BANP BCAS4 BCL2L1 BHLHE40 BNIP2 C1GALT1 CACYBP CASP7 CAV1 CBFA2T3 CBX4 CCDC18 CCDC6 CCDC88C CCDC99 CCL1 CD58 CDC25B CDCA8 CDH23 CDK14 CDK6 CDK9 CDKN1A CELF1 CELF…
CTCF_CB_enhancer	6.0706e-06	2.13683e-77	AARS2 AARSD1 ABCB9 ABCD3 ABHD10 ABL1 ACACA ACAD9 ACADSB ACBD3 ACIN1 ACO2 ACOT7 ACSL4 ACTB ACTL6A ACTR6 ACVR1B ACY3 ADAM15 ADCK1 ADK ADNP ADPRHL1 AGTPBP1 AIFM1 AIM1 AK2 AK7 AKAP10 AKAP2 AMMECR1 AMZ2P1 ANAPC13 ANAPC4 ANG ANGEL2 ANKMY1 ANKRD27 ANKRD33B ANKRD49 ANLN ANP32A ANP32B ANP32E ANXA11 ANXA5 AOX2P AP1B1 AP1M1 AP4S1 APAF1 APC APIP APLF APOLD1 APOO ARF6 ARFGAP3 ARHGAP19 ARHGAP31 ARID1B ARID2 AR…	AACS AARS2 ABCC1 ABCC6 ABCG1 ABHD10 ABHD12B ABLIM2 ABR ACAD9 ACBD3 ACIN1 ACOXL ACSBG2 ACTG1 ACTL6A ACVR1 ACVR1B ACY3 ADAM15 ADAMTS16 ADAMTS7 ADAP1 ADARB1 ADARB2 ADCK1 ADCY10 ADK ADNP ADORA1 ADPRHL1 ADRBK1 AFF1 AFF2 AGTPBP1 AHDC1 AIM1 AIM2 AK1 AK2 AKAP10 AKAP12 AKAP2 AKAP4 AKNA AKT1 ALOX5AP ALPI ALPK1 AMMECR1 ANAPC4 ANGEL2 ANKRD11 ANKRD16 ANKRD27 ANKRD46 ANKRD55 ANLN ANP32A ANP32B ANTXRL ANXA11 AN…
CTCF_CB_all	2.03894e-20	4.25275e-92	AAAS AARS2 AARSD1 ABCB9 ABCD3 ABHD10 ABHD14A ABHD14B ABL1 ACACA ACAD9 ACADSB ACAT1 ACBD3 ACIN1 ACO2 ACOT7 ACSL4 ACTB ACTL6A ACTR6 ACVR1B ACY1 ACY3 ADAM15 ADCK1 ADCK5 ADK ADNP ADPRHL1 AFTPH AGTPBP1 AHCYL1 AIFM1 AIM1 AK2 AK7 AKAP10 AKAP2 AKAP8L ALDH16A1 ALDOA ALG13 ALG5 AMMECR1 AMZ2P1 ANAPC13 ANAPC4 ANG ANGEL2 ANKLE1 ANKMY1 ANKRD27 ANKRD33B ANKRD39 ANKRD49 ANLN ANP32A ANP32B ANP32E ANXA11 ANXA5 AOX…	AACS AARS2 ABCC1 ABCC6 ABCG1 ABHD10 ABHD12B ABHD14B ABLIM2 ABR ACACB ACAD9 ACAT1 ACBD3 ACIN1 ACOXL ACSBG2 ACTG1 ACTL6A ACVR1 ACVR1B ACY3 ADAM15 ADAM19 ADAMTS16 ADAMTS7 ADAP1 ADARB1 ADARB2 ADCK1 ADCY10 ADK ADNP ADORA1 ADPRHL1 ADRBK1 AFF1 AFF2 AFTPH AGTPBP1 AHCYL1 AHDC1 AIM1 AIM2 AK1 AK2 AKAP10 AKAP12 AKAP2 AKAP4 AKAP8L AKNA AKT1 ALDOA ALG13 ALG5 ALOX5AP ALPI ALPK1 AMMECR1 ANAPC4 ANGEL2 ANKLE1 ANKR…
CTCF_ly1_prom	2.44733e-84	4.83158e-51	AAAS AARS2 AARSD1 ABCD1 ABHD14A ABHD14B ACADVL ACIN1 ACOT7 ACTB ACTL6A ACY1 ADAM15 ADAM22 ADCK1 ADCK5 ADK ADNP ADSS AFMID AFTPH AHCYL1 AIM1 AIP AKAP8L ALDH3B1 ALDOA ALG13 ALG5 ALG8 ALKBH4 ANKLE1 ANKMY1 ANKRD13D ANKRD39 ANP32B ANP32E ANXA11 AP4B1 APAF1 APOO ARAP2 ARF6 ARFGAP2 ARHGAP19 ARHGDIA ARID1B ARID2 ARIH2 ARL3 ARL6IP1 ARL6IP6 ARMC5 ARPC5L ARRB2 ASF1B ATAD2 ATAD2B ATF4 ATG16L2 ATG2A ATL2 ATL3…	AARS2 ABCC1 ABCD1 ABHD14B ABHD15 ABR ACADVL ACIN1 ACSF2 ACTL6A ACVR1 ADAM15 ADAM22 ADAMTS13 ADAMTS16 ADAMTS7 ADCK1 ADK ADNP ADORA1 ADRBK1 ADSS AFF1 AFTPH AHCYL1 AHDC1 AIM1 AIP AKAP12 AKAP8L AKIRIN2 AKT1 ALDH3B1 ALDOA ALG13 ALG5 ALG8 ANKLE1 ANKRD11 ANKRD39 ANKRD46 ANP32B ANXA11 APBA1 APBB1IP APBB2 APOO APP ARAP2 ARF6 ARHGAP19 ARHGAP24 ARHGAP26 ARHGDIA ARID1B ARID2 ARIH2 ARL6 ARL6IP1 ARL6IP6 ARL8B …
CTCF_ly1_enhancer	1.56202e-20	1.66659e-110	AARS2 AARSD1 ABCB9 ABCD1 ABCD3 ABHD10 ABHD14A ABL1 ACAA1 ACAA2 ACACA ACAD9 ACADSB ACADVL ACAP1 ACAT1 ACBD3 ACIN1 ACLY ACO2 ACOT7 ACSF3 ACSL4 ACTB ACTL6A ACTR6 ACVR1B ACY3 ADA ADAM15 ADAM22 ADAM29 ADCK1 ADK ADNP ADPRHL1 AFMID AFTPH AGTPBP1 AHCYL1 AHSA2 AIFM1 AIM1 AIP AK2 AK7 AKAP10 AKAP11 AKAP2 ALDH3B1 ALDOA ALG13 ALG5 ALG8 ALMS1 ALOX5 AMD1 AMMECR1 AMZ2P1 ANAPC13 ANAPC4 ANG ANGEL2 ANKLE1 ANKMY1 AN…	AACS AARS2 ABCC1 ABCC6 ABCC8 ABCD1 ABCG1 ABHD10 ABHD12B ABLIM2 ABR ACAA1 ACAA2 ACACB ACAD9 ACADVL ACAP1 ACAT1 ACBD3 ACIN1 ACLY ACOXL ACSBG2 ACSF2 ACSF3 ACTG1 ACTL6A ACVR1 ACVR1B ACY3 ADA ADAM10 ADAM15 ADAM22 ADAM29 ADAMTS13 ADAMTS16 ADAMTS18 ADAMTS7 ADAP1 ADARB1 ADARB2 ADCK1 ADCY10 ADK ADNP ADORA1 ADPRHL1 ADRBK1 AEBP1 AFF1 AFF2 AFTPH AGPAT2 AGTPBP1 AHCYL1 AHDC1 AIM1 AIM2 AIP AK1 AK2 AKAP10 AKAP11…
CTCF_ly1_all	1.37435e-61	1.07499e-123	AAAS AARS2 AARSD1 ABCB9 ABCD1 ABCD3 ABHD10 ABHD14A ABHD14B ABL1 ACAA1 ACAA2 ACACA ACAD9 ACADM ACADSB ACADVL ACAP1 ACAT1 ACBD3 ACIN1 ACLY ACO2 ACOT7 ACSF3 ACSL4 ACTB ACTL6A ACTR6 ACVR1B ACY1 ACY3 ADA ADAM15 ADAM22 ADAM29 ADCK1 ADCK5 ADK ADNP ADPRHL1 ADSS AFMID AFTPH AGTPBP1 AHCTF1 AHCYL1 AHSA2 AIFM1 AIM1 AIP AK2 AK7 AKAP10 AKAP11 AKAP2 AKAP8L ALDH16A1 ALDH3B1 ALDOA ALG13 ALG5 ALG8 ALKBH4 ALMS1 ALO…	AACS AARS2 ABCC1 ABCC6 ABCC8 ABCD1 ABCG1 ABHD10 ABHD12B ABHD14B ABHD15 ABLIM2 ABR ACAA1 ACAA2 ACACB ACAD9 ACADVL ACAP1 ACAT1 ACBD3 ACIN1 ACLY ACOXL ACSBG2 ACSF2 ACSF3 ACTG1 ACTL6A ACVR1 ACVR1B ACY3 ADA ADAM10 ADAM15 ADAM19 ADAM22 ADAM29 ADAMTS13 ADAMTS16 ADAMTS18 ADAMTS7 ADAP1 ADARB1 ADARB2 ADCK1 ADCY10 ADK ADNP ADORA1 ADPRHL1 ADRBK1 ADSS AEBP1 AFF1 AFF2 AFTPH AGPAT2 AGTPBP1 AHCYL1 AHDC1 AIM1 AIM…
P300_ly1_prom	1.04217e-56	4.51439e-30	ACTB ACY3 ADIPOR2 AKT1S1 ALDOA ANAPC13 ANKRD12 ANKRD13A AP4M1 AP4S1 ARID1A ARID2 ARL6IP6 ATG16L2 ATP2A3 ATP5H ATP5J BCL2L11 BRIX1 BRPF1 BRWD1 BZW1 CAP1 CBFA2T3 CCDC77 CCDC88C CCM2 CCND3 CCNL1 CD3EAP CDC7 CDCA4 CDCA7L CDKN2A CDKN2BAS CDT1 CENPE CENPN CEP63 CEP76 CFL1 CHCHD7 CLK3 CORO1A CSNK2A1 CTAGE5 CYTH2 DAP3 DDX54 DEDD2 DGKA DLST DNAJA1 DNAJC3 DNMT1 DOK3 DRAP1 DUT E2F1 E2F5 EEF1D EFCAB5 EIF2A E…	ACTG1 ACY3 ADIPOR2 AFF1 AKT1S1 ALDOA AP4S1 APBB1IP ARID1A ARID2 ARL6IP6 ARL8B ATG16L2 ATP2A3 ATP5H ATP5J AUTS2 BANF1 BCL2L11 BIK BRPF1 CBFA2T3 CCDC77 CCDC85C CCDC88C CCM2 CCND3 CD79B CDC7 CDCA4 CDCA7L CDK14 CDK5RAP1 CDKN2BAS CDT1 CELF2 CELSR3 CENPE CEP63 CEP72 CFL1 CHCHD7 CLK3 CNR2 CORO1A CSNK2A1 CTAGE5 CUX1 CYTH2 DDX54 DEDD2 DERL3 DGKA DLEU2 DLG2 DMD DNAJA1 DNAJC3 DNMT1 DR1 DUT E2F1 E2F5 EEF1D E…
P300_ly1_enhancer	5.44923e-19	1.00437e-116	ACSF3 ACY3 ADAM29 ADPRHL1 AKAP2 ANAPC13 ANKRD33B ANXA11 AP1B1 AP1M1 AP4M1 ARAP2 ARID1A ARID1B ARL6IP6 ARPC1B ATG16L2 ATP2A3 ATP5J ATXN10 BCAS4 BCL11A BCL2L11 BCOR CAMK2D CBX8 CCDC6 CCDC88C CCM2 CD81 CDC7 CDKN2A CDKN2BAS CENPM CIITA CLK3 COPG CORO1A CSK CSNK1E CTAGE5 CXCR4 CXXC5 CYFIP2 CYTH2 DDX54 DEDD2 DERL1 DNAJB12 DNAJC17 DOK3 DUS2L DUT DYRK2 E2F1 E2F2 E2F5 EBF1 EFCAB5 EIF2AK3 ELK1 ELL3 ESR2 ET…	AACS ABCC1 ABCG1 ABHD12B ABLIM2 ABR ACOXL ACSF3 ACY3 ADAM19 ADAM29 ADARB1 ADARB2 ADPRHL1 ADRBK1 AEBP1 AFF1 AGPAT2 AHDC1 AIM2 AKAP2 AKAP4 AKNA ANKRD11 ANKRD16 ANXA11 AP1B1 AP1M1 APBB1IP ARAP2 ARHGAP24 ARHGDIB ARID1A ARID1B ARL6IP6 ARMC9 ARPC1B ARPP21 ARSB ARSG ATG16L2 ATP2A3 ATP5J ATXN10 AUTS2 BACH2 BAIAP3 BANP BCAS1 BCAS4 BCL11A BCL2L11 BCL7C BCOR BFSP2 BHLHE41 BIK BTG4 CABLES1 CACNA1C CAMK2D CAP…
P300_ly1_all	4.91562e-91	1.02737e-193	ABCD1 ABHD11 ABL1 ACAA1 ACAA2 ACACA ACBD3 ACO2 ACSF3 ACSL4 ACTB ACVR1B ACY3 ADA ADAM22 ADAT3 ADK ADPRH ADSS AFTPH AGTPBP1 AHCYL1 AIM1 AIP AK2 AKAP10 AKAP11 AKAP2 AKAP8L AKT1S1 ALDH16A1 ALG5 ALOX5 AMD1 AMMECR1 AMZ2 AMZ2P1 ANAPC13 ANG ANKLE1 ANKRD12 ANKRD13A ANKRD33B ANLN ANP32A ANP32B ANP32E ANXA11 ANXA5 AP1B1 AP1M1 AP4B1 AP4M1 APAF1 APC APIP APLF APOBEC3G APOO ARAP2 ARF1 ARF6 ARFGAP3 ARGLU1 ARHGA…	AACS ABCC1 ABCC8 ABCD1 ABCG1 ABHD11 ABHD12B ABHD15 ABR ACAA1 ACAA2 ACBD3 ACOXL ACSBG2 ACSF3 ACTG1 ACVR1B ACY3 ADA ADAM19 ADAM22 ADAMTS13 ADAMTS7 ADAP1 ADARB1 ADARB2 ADK ADRBK1 ADSS AEBP1 AFF1 AFF2 AFTPH AGPAT2 AGTPBP1 AHCYL1 AIM1 AIM2 AIP AK1 AK2 AKAP10 AKAP11 AKAP2 AKAP8L AKAP9 AKIRIN2 AKNA AKT1S1 ALG5 ALOX5 ALOX5AP ALPK1 AMMECR1 AMZ2 ANKLE1 ANKRD11 ANKRD16 ANKRD46 ANLN ANP32A ANP32B ANXA11 ANXA…
Tcell_up_Ebert_cell_11	1.05099e-25	3.87263e-20	ABCD3 ABCF3 ACADSB ACADVL ACAP1 ACTR6 AHCTF1 AIM1 AIP AKAP11 ALG13 ALG5 ALMS1 AMMECR1 AMZ2 ANGEL2 ANKMY1 ANKRD12 ANKRD49 ANXA11 ARAP2 ARID5A ASB1 ASXL1 ASXL2 ATXN7 AUP1 B2M BIN3 BRD1 BRD9 BRIX1 BRWD1 BTN3A1 BTN3A2 BTN3A3 BUB3 CAMTA1 CARS CASP8AP2 CBLB CBR3 CCDC101 CCDC109B CCDC25 CCDC76 CCDC88C CCDC93 CCND3 CCNL1 CD27 CD46 CDC25B CDK10 CDK13 CDK5RAP3 CDKN2AIP CDR2 CENPT CEP192 CEP350 CEP68 CEPT1 …	ACACB ACADVL ACAP1 ACVR1 ADARB1 AIM1 AIP AKAP11 AKAP9 ALG13 ALG5 AMMECR1 AMZ2 ANGEL2 ANXA11 APBB1IP ARAP2 ARID5A ARL4C ASB1 ASXL2 ATG5 ATXN1 B2M BACH2 BAG3 BIN3 BTN3A2 BUB3 CAMSAP1 CAPZB CARS CARS2 CASP8AP2 CBLB CBR3 CCDC109B CCDC25 CCDC85C CCDC88C CCDC93 CCND3 CCR7 CD247 CD27 CD28 CD46 CD48 CD7 CDC25B CDK10 CDK11B CDK5RAP1 CDKN2AIP CDR2 CEBPZ CELF2 CELSR2 CELSR3 CENPT CEP192 CEP350 CEP72 CEPT1 C…
Tcell_down_Ebert_cell_11	6.87345e-09	1.39272e-12	AKAP2 ALOX5 AP4M1 ARID3A ASH2L ASPM ATP6V0B ATP6V1A AURKA B4GALT5 BCL11A BIRC5 BNIP3L BRCA1 BRCA2 BSPRY BTK BUB1B CBFA2T3 CCNB1 CCNB2 CCNG2 CD74 CDC25A CDK1 CENPA CENPJ CHAF1A CHEK1 CHEK2 CHP CIITA CKS2 CORO1C COX8A CSDA DCLRE1B DHFR DPYSL2 DTL DTX4 DYNLL1 E2F1 EFCAB2 EGR1 ELOVL6 ERI2 ETS2 FABP5 FAM20B FEN1 GAPDH GBE1 GGH GINS1 GINS2 GM2A GNG5 GNG7 GOLIM4 GPX1 GSTP1 HCCS HDGF HIST1H1D HIST1H2AC H…	AKAP2 ALOX5 ANXA4 ARHGAP24 ARID3A AURKA BAHCC1 BCL11A BNIP3L BRCA1 BSPRY BTK BUB1B CBFA2T3 CCNB1 CD38 CD79B CD9 CD93 CDC25A CDK1 CDK14 CDKN1A CENPA CENPJ CHAF1A CHCHD3 CHEK1 CHP CHST15 CIITA COBLL1 CORO1C COX8A CSDA CUX1 DAPK1 DNMBP DNMT3B DTL E2F1 EFCAB2 EGR1 ELOVL6 ENAH ENTPD1 ETS2 ETV5 EVI5 FABP5 FAM20B FLT3 GAB1 GAPDH GAS7 GFOD1 GINS2 GM2A GNA12 GNA15 GNG7 GRN GSTP1 HCCS HDAC9 HIP1 HIST1H2BD …
Bcell_up_Ebert_cell_11	1.05099e-25	4.51636e-34	ACADSB ACBD3 ADK AFTPH AKAP11 AKAP2 ALG13 ALOX5 AMZ2 ANGEL2 ANKRD12 ANKRD49 AP1B1 ARF6 ARPC1B ASXL1 ATF4 ATL2 ATP2A3 AUP1 BARD1 BCL11A BCL2L11 BCL7B BLCAP BTK BTN2A2 CAMK2D CBR3 CCDC6 CCNG2 CCNL1 CD74 CD81 CDK13 CDK5RAP3 CENPM CIITA CIRBP CLINT1 CNOT8 CPEB3 CREB1 CREBZF CSNK1G3 CTAGE5 CTBS CTNNB1 CUL4B CXCR4 CYFIP2 CYP20A1 DAZAP2 DBF4 DCAF4 DDX10 DDX17 DEF8 DNAJB14 DNAJB9 DTX4 DUS2L E2F5 EBAG9 ED…	ABR ACBD3 ADAM19 ADARB1 ADK AFTPH AIM2 AKAP11 AKAP2 AKAP9 ALG13 ALOX5 AMZ2 ANGEL2 ANXA4 AP1B1 APBB1IP ARF6 ARHGAP24 ARPC1B ATG5 ATL2 ATP2A3 ATP8B1 BACH2 BAIAP3 BARD1 BCL11A BCL2L11 BCL7B BEGAIN BHLHE41 BLK BTK BTN2A2 CAMK2D CARS2 CBR3 CCDC6 CD79B CD80 CD81 CD83 CDK14 CDK5RAP1 CDKN1A CENPM CHD7 CHST15 CIITA CIRBP CLASP2 CLINT1 COBLL1 CTAGE5 CTBS CUL4B CXCR4 CXCR5 CYFIP2 CYP20A1 CYTH1 DAZAP2 DCAF4 …
Bcell_down_Ebert_cell_11		0.00162204	ADA BRPF1 BUB1 CCDC86 CD58 CHST11 CITED2 COPB2 COPG DNMT1 DTL E2F3 ELOVL6 ENTPD5 ETS2 EXO1 FKBP5 FYCO1 GFI1 GSTO1 H2AFJ HMG20B KEAP1 MBOAT7 MLF1IP MRPL23 NCAPD2 NCAPG NDUFA8 NUCB2 PDE12 POLH RCC1 RGS3 RRBP1 SETMAR SGK3 SIGMAR1 SLC39A8 SLC43A3 SOCS2 SPATA7 STIP1 TOP2A TPM2 TRERF1 TRIM14 TYMS UBTF XBP1 ZCCHC14 ZNF749 ZWINT	ADA ARHGAP26 BRPF1 BUB1 CD244 CD58 CFD CHST11 CITED2 COPB2 CPM DAPK1 DNMT1 DNMT3B DTL ELOVL6 EMP1 ENTPD5 ETS2 FKBP5 FRMD4B FYB FYCO1 GABARAPL1 GFI1 GSTO1 HMG20B ID2 KEAP1 KL MLF1IP MRPL23 NCAPD2 NCAPG NDUFA8 NUCB2 PGCP PKP4 PLXDC1 PRKCA PRKCH RCC1 RGS3 RRBP1 SETMAR SGK3 SLAMF7 SMAD1 SOCS2 SORL1 ST3GAL6 TARP TIAM1 TOP2A TPST2 TRIM14 UBTF ZNF749 ZWINT
NK_down_Ebert_cell_11	0.000161375	0.00020904	ACADM ADI1 AMD1 ARNT ATP5H BCL11A BNIP3L CCDC6 CD3EAP CDK2 CEP170 COX6B1 CSTF1 DLG4 DNA2 DNAJC15 DUT EDEM3 ELK1 FABP5 GPX1 GTF2A2 HIST1H2AC HMGA1 HNRNPC KHSRP KIF20B LMNB1 LRRC8B MCM2 METTL1 MTFR1 MXI1 NOL7 ODC1 PAICS PARVB PLAG1 PPP2R1B PRDX6 PTTG1 RMND5B RPL35 RPL36 RPLP2 RPS15 RQCD1 SLC16A1 SLC35F2 SSR4 TCF3 THOC7 TTF2 TXN ZWINT	ADAM19 ADI1 AEBP1 ANKRD46 APP ATP5H ATP5O BCL11A BNIP3L CCDC6 CDK2 COX6B1 DNA2 DNAJC15 DUT EDEM3 ELK1 FABP5 GTF2A2 HEBP2 HK2 HMGA1 HSD17B12 IGF2BP3 KDM6B KHSRP KIF20B LRRC8B MCM2 METTL1 MTFR1 MXI1 PARVB PPP2R1B PTTG1 RFC3 RPL35 RPL36 RPS15 RQCD1 SERINC5 SLC16A1 SLC35F2 SLC7A5 SSR4 SYPL1 TCF3 THOC7 TTF2 TXN WASF1 ZWINT
HSC_up_Ebert_cell_11	0.00163795	0.00188832	ABHD10 ACACA ACADM ADA AK2 ANAPC13 AP4M1 APIP ARL3 ATP5G2 ATXN10 AVEN B3GNT2 BCL11A BSPRY C2CD2 CAPRIN1 CASP2 CBFA2T3 CCDC41 CCDC6 CCT2 CENPO CEP170 CEP70 COQ7 COX15 CRELD1 DCTPP1 DKC1 DLG4 DUSP10 ENO1 ERLIN1 ESD ETS2 FABP5 FAHD2A FAIM FANCF FANCL FLNB FPGS GABPB1 GALNT2 GANAB GBE1 GGCT GGH GSTP1 GTF2H5 H2AFJ H2AFV HIST1H1D HIST1H2AG HIST1H2BD HIST1H2BI HIST1H3D HIST1H4E HMGA1 HN1L HNRNPAB HSD17B…	ABCC1 ABCG1 ABHD10 ADA AK2 ANKRD46 APIP ATP5G2 ATXN10 AVEN B3GNT2 BAHCC1 BCKDHB BCL11A BSPRY C2CD2 CAPRIN1 CASP2 CBFA2T3 CCDC6 CCT2 CDK6 COQ7 CTNNA2 DAPK1 DCTPP1 DKC1 DNAJC12 DNMT3B EMP1 ERCC1 ESD ESR1 ETS2 ETV5 ETV6 FABP5 FAIM FLNB FLT1 FLT3 FPGS FRMD4B GABPB1 GALNT2 GANAB GGCT GNA15 GPR124 GSTP1 GTF2H5 HIST1H2BD HIST1H2BK HIST1H4E HMGA1 HN1L HSD17B12 HSPB1 ICA1 IFT81 IL1B IMPA2 IPO7 KDM1A KIAA0…
HSC_down_Ebert_cell_11		0.010041	ALOX5 BCL2L11 IGF2R IL10RA IL23A JUNB KIAA0922 PCSK7	ALOX5 ALOX5AP BCL2L11 CCR7 FYB IGF2R ITGB7 KIAA0922 LY9 PARP8 PPARD PRKCA SMAD7 SP100 ZBTB7A
HSC_e-ERY_up_Ebert_cell_11	2.20475e-45	9.15718e-25	ABHD10 ABL1 ACACA ACADM ACOT7 ACSL4 ACTL6A AHCYL1 AK2 AKAP2 ALG8 AMD1 ANAPC13 ANKRD27 ANP32A ANP32B AP4M1 APIP ARL1 ASH2L ATIC ATP2A2 ATP5G2 ATP5G3 ATP5J ATXN10 ATXN2 AVEN B3GNT2 BCL11A BCS1L BIRC5 BRCA1 BSPRY BUB1B C2CD2 CACYBP CALR CALU CAPRIN1 CASD1 CASP2 CBFA2T3 CBX3 CCDC41 CCDC6 CCDC86 CCNE1 CCNE2 CCNJ CCT2 CD3EAP CD63 CDC25A CDC6 CDC7 CDCA4 CDK2 CENPJ CENPO CEP170 CEP57 CEP70 CHD1L CHEK1 CH…	ABCC1 ABHD10 ACTL6A AHCYL1 AK2 AKAP2 ALG8 ANKRD27 ANKRD46 ANP32A ANP32B APIP APP ATP2A2 ATP5G2 ATP5G3 ATP5J ATP5O ATXN10 ATXN2 AVEN B3GNT2 BAHCC1 BANF1 BCKDHB BCL11A BCS1L BRCA1 BSPRY BUB1B C2CD2 CACYBP CALU CAPRIN1 CASD1 CASP2 CBFA2T3 CBX3 CCDC6 CCNE2 CCNJ CCT2 CDC25A CDC6 CDC7 CDCA4 CDK2 CDK6 CENPJ CHCHD3 CHD1L CHEK1 CHSY1 COX5A COX6B1 CPSF6 CREB3L2 CS CUTC DAD1 DAG1 DAPK1 DCTPP1 DEK DIXDC1 DKC…
HSC_e-ERY_down_Ebert_cell_11	0.000159177	3.30663e-21	AFTPH ALOX5 AMZ2 APC ARF6 ARIH2 ARRB2 B2M BCL2L11 BTN2A2 BTN3A2 C1GALT1 CCDC88C CCND3 CD27 CDC25B CDR2 CEPT1 CLK3 CORO1A CPEB3 CREBL2 CXCR4 CYFIP2 CYP20A1 DAZAP2 DEF6 DGKA DYRK2 ETS1 EZR FAIM3 FGD2 FLJ43663 GSK3B HERPUD1 HLA-B HLA-E HMOX2 IGF2R IKZF5 IL10RA IL23A IQSEC1 IRAK4 IRF2 IRF4 ISG20 ITCH JMJD6 JUNB KIAA0922 KLF2 LCK LIMD2 LNPEP LPXN LRCH4 LRP10 MALT1 MAST3 MBP MKNK2 NFKB1 NFKBIA NR3C2 NR…	ABR ADAM19 ADAP1 AFTPH AIM2 ALOX5 ALOX5AP AMZ2 ANKRD11 APBB1IP ARF6 ARHGAP26 ARIH2 ARL4C ARRB2 B2M BCL2L11 BTN2A2 BTN3A2 C1GALT1 CADM1 CCDC69 CCDC88C CCND3 CCR7 CD247 CD27 CD28 CD48 CD7 CDC25B CDK11B CDR2 CEPT1 CHST15 CLK3 CORO1A CXCR4 CXCR5 CYFIP2 CYP20A1 CYTH1 DAZAP2 DEF6 DGKA DGKD DOCK10 DPEP2 DYRK2 ETS1 EZR FAM53B FAM65B FLJ43663 FLNA FYB GADD45B GLG1 HERPUD1 ID2 IFNAR2 IGF2R IKZF3 IKZF5 IL16…
ERY_up_Ebert_cell_11	6.43794e-31	1.96902e-15	AAAS ABHD11 ACOT7 ADIPOR2 AGPAT1 AIMP2 AMD1 ANP32B ANP32E ARF1 ARHGAP11A ARIH2 ARL6IP1 ARMC8 ASF1B ASH2L ASPM ATAD2 ATP5S ATP6V0B ATP6V1A AURKA B3GNT2 B4GALT2 B4GALT5 BAP1 BIRC5 BNIP3L BRCA1 BRCA2 BSG BUB1 BUB1B C1GALT1 CALR CARHSP1 CBX3 CCNB1 CCNB2 CCNE1 CCNE2 CCS CD59 CDC20 CDC25A CDC6 CDCA8 CDK1 CDK2 CDKN2D CDKN3 CENPA CENPE CENPF CENPM CENPN CEP76 CHAF1A CHCHD2 CHEK1 CHMP1A CHP CIT CITED2 CKS…	ABCG2 ABHD11 ADIPOR2 ADORA1 AFF1 AK1 ANP32B ARF1 ARIH2 ARL6IP1 ARMC8 ASAP1 ATN1 ATP6V1C1 AURKA B3GNT2 B4GALT2 BAP1 BCL2L1 BNIP3L BRCA1 BSG BUB1 BUB1B C1GALT1 CALCOCO1 CARHSP1 CAV1 CBX3 CCNB1 CCNE2 CD2AP CD59 CDC25A CDC6 CDCA8 CDK1 CDK2 CDKN3 CDYL CENPA CENPE CENPF CENPM CHAF1A CHCHD2 CHEK1 CHMP1A CHP CIT CITED2 CLPX CMAS COPS3 CORO1C COX6B1 CRNKL1 CRYM CSDA CSNK2A1 CTDSP2 CTSE DAD1 DCK DCTN4 DCUN…
ERY_down_Ebert_cell_11	6.42209e-41	3.43532e-37	ACAP1 ACBD3 ADNP AHCTF1 AIM1 AIP AKAP10 AKAP11 ALG13 ALG5 ANGEL2 ANKRD12 ANP32A ANXA11 ANXA5 APAF1 APOBEC3G ARAP2 ARF6 ARGLU1 ARHGAP1 ARID1A ARPC5L ATF2 ATP2A3 ATXN2 ATXN2L ATXN7 AUP1 B2M BAZ1A BCOR BRD1 BRIX1 BRWD1 BTN3A1 BTN3A2 BTN3A3 BUB3 CAP1 CARS CASP7 CBLB CCDC109B CCDC93 CCNG2 CCNL1 CD46 CD74 CD81 CDK10 CDK13 CDK5RAP3 CEP350 CEP63 CEP68 CFL1 CHCHD7 CIAO1 CNPY3 CORO1A CPEB3 CPSF7 CSAD CSK C…	ABCC1 ABCG1 ABR ACAP1 ACBD3 ACTG1 ADAM10 ADAM19 ADNP AIM1 AIM2 AIP AKAP10 AKAP11 AKAP9 ALG13 ALG5 ANGEL2 ANKRD11 ANP32A ANXA11 ANXA4 APBB1IP APOBEC3G ARAP2 ARF6 ARHGAP1 ARHGAP26 ARHGDIB ARID1A ARL4C ARPC5L ATG5 ATP2A3 ATXN2 AUTS2 B2M BACH2 BAZ1A BCOR BTN3A2 BUB3 CAPZB CARS CASP7 CBLB CCDC109B CCDC69 CCDC93 CD46 CD48 CD81 CD83 CDK10 CDK5RAP1 CEBPZ CELF2 CEP350 CEP63 CFL1 CHCHD7 CNPY3 CORO1A COTL1 …
I-ERY_up_Ebert_cell_11	1.44331e-20	9.70276e-12	AAAS ACO2 ADIPOR2 AGPAT1 AIMP2 AMD1 ANP32B ANP32E ARF1 ARHGAP11A ARIH2 ARL6IP1 ASF1B ASH2L ASPM ATAD2 ATG2A ATP5S ATP6V0B ATP6V1A AURKA B4GALT5 BAP1 BCL2L11 BIRC5 BNIP3L BSG BUB1 BUB1B C1GALT1 CARHSP1 CCHCR1 CCNB1 CCNB2 CCS CD59 CDC20 CDC25A CDC6 CDCA8 CDK1 CDK12 CDKN2D CDKN3 CENPA CENPE CENPF CENPN CEP76 CHCHD2 CHMP1A CHP CIT CITED2 CKS2 CLPX CMAS COPS3 CORO1C COX6B1 CREB1 CREBL2 CRIPT CRKL CSDA…	ABCG2 ADIPOR2 ADORA1 AFF1 AGPAT2 AK1 ANP32B ARF1 ARIH2 ARL6IP1 ASAP1 ATG2A ATN1 ATP6V1C1 AURKA BAP1 BCL2L1 BCL2L11 BNIP3L BSG BUB1 BUB1B C1GALT1 CALCOCO1 CARHSP1 CCNB1 CD2AP CD59 CDC25A CDC6 CDCA8 CDK1 CDKN3 CDYL CENPA CENPE CENPF CHCHD2 CHMP1A CHP CIT CITED2 CLASP1 CLPX CMAS COPS3 CORO1C COX6B1 CPM CRNKL1 CSDA CSNK2A1 CTDSP2 CTSE CYP19A1 DAD1 DCK DCTN4 DCUN1D1 DEPDC1 DERL1 DLGAP5 DNAJA1 DNAJC9 D…
I-ERY_down_Ebert_cell_11	5.65599e-90	2.58402e-61	ABCD3 ABHD10 ABL1 ACAA2 ACACA ACBD3 ACSL4 ADA ADK ADNP ADSS AHCTF1 AIM1 AIP AK2 AKAP10 AKAP11 ALDOA ALG13 ALG5 ALG8 ANAPC13 ANGEL2 ANKRD12 ANP32A ANXA11 ANXA5 APAF1 APOBEC3G ARAP2 ARF6 ARFGAP3 ARGLU1 ARHGAP1 ARID1A ARL1 ARPC1B ARPC5L ATF2 ATIC ATP2A2 ATP2A3 ATP5G2 ATP5G3 ATXN2 ATXN2L AUP1 B2M BAG5 BAZ1A BCAP31 BCOR BIN3 BRD1 BRIX1 BRP44L BRWD1 BTN3A1 BTN3A2 BTN3A3 BUB3 CACYBP CAND1 CAP1 CAPRIN1 C…	ABCC1 ABCG1 ABHD10 ACAA2 ACACB ACBD3 ACTG1 ADA ADARB1 ADK ADNP ADSS AIM1 AIP AK2 AKAP10 AKAP11 AKAP9 ALDOA ALG13 ALG5 ALG8 ANGEL2 ANKRD11 ANP32A ANXA11 ANXA4 APBB1IP APOBEC3G ARAP2 ARF6 ARFGAP3 ARHGAP1 ARHGAP26 ARHGDIB ARID1A ARPC1B ARPC5L ATG5 ATP2A2 ATP2A3 ATP5G2 ATP5G3 ATXN2 AUTS2 B2M BAG5 BAZ1A BCKDHB BCOR BHLHE40 BIN3 BNIP2 BTN3A2 BUB3 CACYBP CAND1 CAPRIN1 CAPZB CARS CASD1 CASP7 CBLB CCDC109…
GMP_up_Ebert_cell_11		3.19385e-05	ALDH3B1 ALOX5 ANXA5 APAF1 ARPC1B ARRB2 ATP6V0B BAX BTK CAMKK2 CAP1 CCNG2 CD74 CIITA CNPY3 CORO1A CSK CYBA DBI DNASE1L1 DPYSL2 DTX4 FAM129A FGD2 FRAT1 FRAT2 FTSJ2 GDI2 GLB1 GLT25D1 GM2A GNG5 GPN3 GSTP1 HERPUD1 HLA-DMB HLA-DPA1 HLA-DPB1 HLA-DQA1 HLA-DRA IMPA2 IRF5 KIAA0319L KIAA1033 LASP1 LAT2 LOC150776 LTA4H MAN2B1 MARCKS MGAT1 MLX MOSPD2 MYD88 NAAA NAGA NAGK NCF4 NPC2 NRBF2 NUBP1 NUP214 PACSIN2 P…	ABR ADAP1 ALDH3B1 ALOX5 ALOX5AP ARHGAP24 ARHGAP26 ARPC1B ARRB2 BAX BTK CAMKK2 CD244 CD9 CD93 CDKN1A CFD CHST15 CIITA CNPY3 CORO1A COTL1 CRYBG3 CSK CYBA DBI DNMBP ELF4 ENTPD1 EVI5 FBP1 FTSJ2 GADD45B GAS7 GLT25D1 GM2A GRN GSTP1 HBEGF HDAC9 HERPUD1 HK2 HLA-DPB1 HLA-DQA1 HLA-DRA HLA-DRB1 IFNGR2 IGF2BP3 IMPA2 IRF5 ITPK1 KIAA1033 LASP1 LAT2 LOC150776 LY86 LYN MAN2B1 MARCH1 MARCKS MEFV MKL1 MLX MS4A6A M…
ARID1A_mut_up_141_Ash_FL	6.69587e-05	0.00101433	CHST11 DNAJC15 DNPEP FAM128A GLTSCR2 LAX1 LEPROTL1 LFNG MXI1 NCF4 NIPSNAP3A P2RY10 PIGC PRCP PSMB10 PSMB9 RAC2 RBCK1 RPS23 S1PR4 SASH3 SCAMP1 SCAND1 SEPW1 SIDT1 SLC1A4 SNX17 TAP1 TGIF1 TOR1AIP1 TXNDC12 UBE2E2 UQCRC1 UTP18 WDR43 WDR54 WDR77	APOBEC3F ARL4C CD247 CHST11 DNAJC15 DNPEP FAM108B1 FAM128A IFNAR2 IFNGR2 LAX1 MXI1 NCF4 NIPSNAP3A P2RY10 PIGC RAC2 RASSF5 RBCK1 RPS23 SASH3 SCAMP1 SIDT1 SLAMF6 SLC1A4 SNX17 TGIF1 TNS3 TSN TXNDC12 UBE2E2 WDR77
ARID1A_mut_down_390_Ash_FL	1.04035e-12	1.40355e-11	AHSA2 AKAP2 ANAPC4 ANKRD13A ARL6IP6 ARPC5L ATF4 ATF5 B4GALT5 CARS CBX3 CCDC126 CCDC6 CD27 CD59 CEP192 CIITA CPEB2 DEF8 DIP2A DTNBP1 EGR1 EIF2AK3 EPC1 FAM45A FDFT1 FUS GAS5 GOLGA4 GOT2 HERPUD1 HMGN1 HNRNPD HS2ST1 KCTD9 KIAA0528 KIAA0922 KIAA1468 LEMD3 LMO4 LOC91316 LRCH3 LRRC8D LYPLA1 MALT1 MAPK1IP1L MAPK8IP3 MBD4 NAGK NASP NRBF2 NUP153 NUP210 ODC1 OSBPL9 P2RX5 PEX5 PKN2 PMS2L3 PPAPDC1B PPTC7 PRKC…	AACS ADARB1 AKAP2 ANAPC4 ARHGAP24 ARL6IP6 ARPC5L CARS CBX3 CCDC6 CD27 CD38 CD59 CDK5RAP1 CDK6 CEP192 CIITA CLASP2 CUX1 DIP2A DTNBP1 EGR1 EHBP1L1 EIF2AK3 EPC1 FAM45A FNBP1 FUS GADD45B GOT2 GPBP1L1 HERPUD1 HMGN1 HNRNPD HS2ST1 IL4R ITGAE KIAA0528 KIAA0922 KLHL6 LEMD3 LMO4 LPIN1 LRRC8D LYPLA1 MAML3 MAPK1IP1L MOBKL1A MTMR12 NACA NAGK NANS NRBF2 NUP153 NUP210 OSBPL9 P2RX5 PAG1 PEX5 PIK3C2A PIP4K2A PMS2…
CREBBP_mut_up_334_Ash_FL	5.14925e-08	2.95445e-08	ACBD3 AKAP11 ARF6 ASXL2 ATL3 BRWD1 CAMK2D CHST11 CITED2 CNBP CTDSPL2 CXCR4 CXXC5 DERA EBAG9 EIF1AX ERBB2IP ERP29 EZR FAM60A FLJ10038 FOXP1 HCG11 HECTD1 HNRNPA3 HNRNPR IFIT5 IGF2R IMPAD1 ITGA4 LCORL LPXN MAPK1 MBP MESDC1 MRPL18 NGLY1 NUPL1 ORAI2 ORAI3 OSBPL8 PAPOLA PARP14 PCGF5 PCMT1 PDS5B PICALM PLEKHG1 PNRC1 PPM1A PPP3CA PRCP PRKCE PTP4A2 PTPLAD1 PYHIN1 RBM15 RBM27 RIF1 SERTAD2 SGK3 SMCHD1 SNHG6…	ACBD3 ACVR1 AKAP11 ARF6 ASXL2 BACH2 CAMK2D CHST11 CITED2 CNBP CXCR4 CXXC5 DERA DOCK10 EBAG9 EIF1AX ERP29 EVI5 EZR FAM53B FAM60A FLT1 FOXP1 GNB4 HBS1L HEBP2 HNRNPA3 IFIT5 IGF2R IKZF1 IKZF3 IMPAD1 ITGA4 KLF13 MARCH1 MBP NCK2 NEDD9 NGLY1 NUPL1 ORAI3 OSBPL8 PAPOLA PCGF5 PCMT1 PDS5B PHF3 PICALM PLCL2 PLEKHG1 PNRC1 PPM1A PPP2R5E PTP4A2 PTPLAD1 PUM2 PYHIN1 RIF1 RUNX1 SERTAD2 SGK3 SMCHD1 SNHG6 SP100 SP3 …
CREBBP_mut_down_278_Ash_FL	4.91757e-06	0.000349674	ACTL6A ADSS BCAS4 BTN2A2 CD58 CD74 CENPK CENPN CEP170 CLINT1 COQ9 CTNNB1 DTNBP1 DYNLL1 E2F3 ERLIN1 EXOSC8 FANCD2 FASTK FBXO28 FDFT1 FKBP5 GAPDH GAS5 GEN1 GPR89A GSTP1 HIST1H2AC HIST1H2BC IARS IRF5 KLF10 KPNA2 KTELC1 LANCL1 LPXN MCM3 MCM5 MLF1IP MOBKL2A MRPL24 MRPL39 MRPL9 NAGK NDUFB2 PAICS PEA15 PHF19 PIN4 POP5 PPP1R14B PSMG1 RABGAP1L RFC4 RFWD2 RPP40 RSPRY1 SNX5 THOC7 TIMELESS TNFRSF17 TPI1 TRAP…	ACTL6A ADARB1 ADSS BCAS4 BTN2A2 CD58 CENPK CLINT1 COQ9 DTNBP1 EIF2AK1 FAM102A FANCD2 FASTK FBXO28 FKBP5 GAPDH GEN1 GPR89A GSTP1 IARS IRF5 KLF10 KPNA2 LANCL1 LGALS3 LPIN1 MCM3 MCM5 MLF1IP MOBKL2A MRPL24 MRPL39 MRPL9 NAGK NDUFB2 PEA15 PHF19 PHTF2 PIN4 PLEK PPP1R14B RABGAP1L RHOQ SH3KBP1 SLAMF1 SMG7 SNAP23 SNX5 THOC7 TIMELESS TNFRSF17 TPI1 TRAPPC5 VARS2 ZMIZ1
EP300_mut_up_104_Ash_FL	0.00455296	0.0196816	ADNP AMZ2 CHCHD7 DAZAP2 DYRK2 EBAG9 EPC1 FBXO30 KIAA1033 MTF1 MTMR9 NBN OSBPL8 PNRC1 PPP2R2A PPP3CA RBM16 REV3L RNF138 SLC39A6 UBAC2 YLPM1 ZBTB20 ZDHHC17 ZNF559	ADNP AMZ2 CHCHD7 DAZAP2 DYRK2 EBAG9 EPC1 IKZF1 JMJD1C KATNA1 KIAA0232 KIAA1033 NBN OSBPL8 PAG1 PNRC1 RNF138 STRBP TNFAIP3 UBAC2 ZBTB20 ZDHHC14
EP300_mut_down_271_Ash_FL	1.47882e-11	2.45575e-10	AK2 ALDOA ATP5G3 CARHSP1 CDC25B CENPK CHCHD2 COX5A CSDA DAP3 DBI DPM3 DUT EIF3G FANCI FLJ10038 GCET2 GINS2 GSTP1 H2AFJ HDGF HIST1H2AB HIST1H2BD HMGA1 HMMR IRS1 KDELR2 KPNA2 LAX1 LRP6 MAD1L1 MCM2 MCM3 MCM4 MCM6 MELK MIF4GD MPG MRPL12 MRPL37 MTX1 NCAPD2 NDUFB7 NDUFS8 NOB1 NUDCD2 PAICS PDIA6 PFKP PGAM1 PGM1 PI4K2B PIH1D1 PIM1 PLEKHJ1 PRDX6 PRRC1 PSMD7 PTTG1 PYHIN1 QARS RBCK1 RNF187 SCAND1 SERBP1 SH3…	AK2 ALDOA ATP5G3 ATP5O AUTS2 CARHSP1 CD247 CDC25B CENPK CHCHD2 COX5A CSDA DBI DUT EIF3G FAM53B FANCI GCET2 GEMIN7 GINS2 GSTP1 HIST1H2BD HIST1H4J HMGA1 HMMR IRS1 KDELR2 KIAA0114 KPNA2 LAX1 LHPP MAD1L1 MAP2K6 MCM2 MCM3 MCM6 MELK MIF4GD MPG MRPL12 MRPL37 NCAPD2 NDUFB7 NDUFS8 NOB1 NSMCE1 PDIA6 PFKP PGM1 PI4K2B PRRC1 PSMD7 PTTG1 PYHIN1 QARS RBCK1 SERBP1 SH3TC1 SLC44A1 SMAD1 SNRPA SSR2 ST14 SUSD3 TCF3 …
EZH2_mut_up_124_Ash_FL	0.0237734	3.24444e-05	ACO2 ATXN7 B4GALT5 CCDC6 CTBP1 GIT2 LANCL1 MALT1 MAP4K1 MAST3 MDC1 NAAA NCOR1 NIN NUP210 PMS2L5 PRKAB1 RABGAP1L SH2B3 SLC7A6 SPATS2 SSH2 ST6GAL1 TMC6 TMEM64 ZNF529	ARHGAP24 CCDC6 CLPTM1L CTBP1 ELF4 FAM107B FNBP1 GIT2 ILDR1 KIF3B LANCL1 LPIN1 MAST3 MDC1 NAAA NUP210 PHTF2 PLEK PMS2L5 PRKD3 RABGAP1L RASSF2 RHOQ SH2B3 SIPA1L3 SLAMF1 SLC7A6 SNAP23 SNX25 SORL1 TMC6 ZMIZ1 ZNF529
EZH2_mut_down_347_Ash_FL	2.46047e-08	3.80423e-07	ADI1 ANP32A APIP ARFGAP3 ARL3 CABC1 CAMK2D CDKN2C CEP68 CHST11 COX15 CREBL2 CSNK1G3 CSNK2A1 CUL4B CXXC5 DERA DERL1 DYRK2 E2F5 ERBB2IP ESD ETS1 GGH GLCCI1 GTDC1 HDAC2 HNRNPR IFIT5 IGF2R ISG20 KCNA3 LEPROT LRP6 MAN1A1 MARCH3 MIB1 MRPL34 NAPEPLD NBN ORAI2 PCGF5 PEX5 PGM1 PGRMC2 PIGC PIGY PIM1 PPM1A PRCP PTPN1 PTPRCAP PWP1 PYHIN1 RASGRP2 RBBP7 RBPJ S1PR1 SCAMP1 SERBP1 SERP1 SLC1A4 SMC1A SPTBN1 SSX2IP…	AACS ACVR1 ADI1 ANP32A APIP ARFGAP3 BACH2 CAMK2D CD79B CD9 CDKN2C CHST11 CSNK2A1 CUL4B CXXC5 DERA DERL1 DNMBP DYRK2 E2F5 ESD ETS1 FAM108B1 GPM6A GTDC1 HDAC2 IFIT5 IGF2R IKZF3 IL4R ISG20 LEPROT MAN1A1 MME NBN NCK2 PCGF5 PEX5 PGM1 PGRMC2 PHF16 PIGC PIGY PLCL2 PPM1A PTPN1 PTPRCAP PWP1 PYHIN1 RASGRP2 RASSF6 RBPJ RNF144B SCAMP1 SERBP1 SERP1 SLAMF6 SLC1A4 SLC35E3 SMC1A SPTBN1 STK24 SYK TCL6 TGIF1 TM7SF…
KMT2D_mut_down_41_Ash_FL	0.0127399		CAMK2D DDX6 NBN OSBPL8 PPP1R12A RILPL2 SFRS2IP SYNCRIP YY1 ZFP91 ZFR	CAMK2D FAM53B JMJD1C NBN OSBPL8 PPP1R12A SFRS2IP STRBP SYNCRIP
KMT2C_mut_up_144_Ash_FL	4.62208e-05	0.000140286	ASXL2 CEPT1 CNPY3 CREB1 CRKL DCP2 DDX6 DNPEP HNRPDL ING1 KIAA0494 KIAA1949 KRAS LNPEP LOC647121 LYL1 MAPK1 MYST3 NAAA NKRF PCBP1 PDLIM2 PPP3R1 PPP6C PURA RIF1 RSBN1L RUNDC1 SETX SFT2D3 SNX10 SP3 STAT1 TLR10 TNFAIP8 TOR1AIP1 TSPO ZBTB20	APOBEC3F ASXL2 CEPT1 CLASP1 CNPY3 DCP2 DNPEP HMGN4 IDS INPP5D KIAA1949 KRAS LNPEP LYN MARCH1 NAAA NCOA1 PCBP1 PDLIM2 PPP1R16B PPP6C RIF1 RUNDC1 SEPT6 SETX SNX10 SP100 SP3 STAT1 STK17B TLR10 TNFAIP8 TSN TSPO ZBTB20
KMT2C_mut_down_214_Ash_FL	7.30874e-23	1.11988e-10	ACAT1 ADK AMD1 AMZ2 ARID1B ATF4 ATP6V0B BAX BRP44L BUB3 CCDC126 CCNB1 CCNB2 CCNE2 CD59 CD81 CDC25B CDCA2 CDR2 CEP152 CIRBP CITED2 CKS2 COMMD4 COX5A DBF4 DEF8 DNAJC9 DOK3 DUT EIF2A EIF4A3 ESR2 EZH2 FAM45A GAS5 GNAS GOLT1B GUSB H2AFX H2AFZ HMGB2 HMMR IFT80 IPO7 KPNA2 LACTB2 LOC100128822 LOC388796 MAPK8IP3 MCM7 MELK MYBL2 NCAPG NDUFV1 NEIL1 NPM1 NUSAP1 OSBPL9 PBXIP1 PCCB PEBP1 PLEKHJ1 POLR1D PPFIBP2…	ACAT1 ADK AMZ2 ARID1B BAX BCKDHB BUB3 CCNB1 CCNE2 CD59 CD81 CDC25B CDR2 CEP152 CIRBP CITED2 COMMD4 COX5A CUX1 DNAJC9 DUT EHBP1L1 EIF4A3 FAM45A GNAS GOLT1B GUSB H2AFZ HBS1L HMGB2 HMMR IPO7 ITGB3BP KPNA2 LACTB2 MCM7 MELK MSI2 MYBL2 NACA NANS NCAPG NDUFV1 NEIL1 NPM1 NUSAP1 OSBPL9 PBXIP1 PCCB PEBP1 PPFIBP2 PPP2CA RALBP1 RINT1 SAMSN1 SAT1 SLC2A6 SMARCA4 SNX5 SYNCRIP TRIO ZNF326
CREBBP.mouse.ChIPseq.LOSS.25.prom	8.93818e-20	4.11239e-10	ABHD10 ACADVL ACIN1 ACSL4 ACTB ACTR6 ADNP AGPAT1 AGTPBP1 AHCYL1 AMD1 ANKRD13A ANXA5 AP1B1 ARAP2 ARGLU1 ARL13B ARL8A ATAD5 ATF2 ATP6V0B BAX BOP1 BZW1 CAD CALR CASP8AP2 CCDC22 CCDC58 CCDC86 CCDC93 CCND3 CDKN2AIP CEP68 CHPF2 CISD1 COG8 COX8A CRIPT CS CSNK1D CSNK1E CTDP1 DAZAP1 DBF4 DDA1 DDX10 DHX15 DLG1 DNAJC15 DNAJC3 DOLK DRAP1 DYNLL1 E2F1 EIF2C3 EIF5 ELK1 ERAP1 FAM162A FAM60A FAM82A2 FBL FTSJD1 FU…	AACS ABCC1 ABHD10 ACADVL ACIN1 ACSF2 ADAM10 ADAMTS13 ADNP AGTPBP1 AHCYL1 AHDC1 AP1B1 ARAP2 ARL8A ARL8B ATP6V1C1 ATXN7L3 BAX BHLHE40 BOP1 CAD CASP8AP2 CCDC22 CCDC93 CCND3 CDH23 CDK6 CDKN2AIP COG8 COX8A CRNKL1 CS CSNK1D CSNK1E DAZAP1 DDA1 DHX15 DNAJC15 DNAJC3 DOCK10 DTX1 DYNC1H1 E2F1 EARS2 EIF2C3 ELK1 ERAP1 ESR1 ETV6 FAM129C FAM60A FARS2 FBL FRMD8 GADD45G GGA3 GLT25D1 GOLPH3 GPAM GRPEL1 HAT1 HAUS5 …
CREBBP.mouse.ChIPseq.LOSS.25.enhancer	8.12764e-18	6.88196e-23	ACADVL ACIN1 ACSF3 ACSL4 ACTR6 ADNP AGPAT1 AGTPBP1 AHCYL1 AKAP2 ANKRD13A ANXA5 AP1B1 ARAP2 ARGLU1 ARID1B ARL13B ARL8A ARPC1B ASXL2 ATF2 ATG16L2 ATP6V0B BAX BOP1 BTBD19 BZW1 CALR CAMK2D CAPRIN1 CASP8AP2 CCDC109A CCDC22 CCDC93 CCND3 CCNL1 CD2BP2 CDKN2AIP CDT1 CEPT1 CISD1 COX8A CPSF6 CREBL2 CS CSNK1D CSNK1E CTDP1 DAZAP1 DCUN1D1 DDA1 DENND1A DHX15 DLG1 DLG4 DNAJB5 DNAJC15 DNAJC3 DOK3 DRAP1 DTX4 DYNLL…	AACS ABCC1 ACADVL ACIN1 ACSF2 ACSF3 ADAM10 ADAMTS13 ADNP AGTPBP1 AHCYL1 AHDC1 AKAP12 AKAP2 AP1B1 APP ARAP2 ARHGAP26 ARID1B ARL8A ARPC1B ASXL2 ATG16L2 ATP6V1C1 ATXN7L3 BAX BCL9L BHLHE40 BOP1 BTBD19 CAMK2D CAPRIN1 CAPZB CASP8AP2 CCDC109A CCDC22 CCDC93 CCND3 CD2AP CD2BP2 CD80 CD9 CDK6 CDKN2AIP CDT1 CEPT1 CHD2 CHD7 CHSY1 CMIP COBLL1 COMMD1 COX8A CPSF6 CRNKL1 CRTC3 CS CSNK1D CSNK1E DAZAP1 DCUN1D1 DDA1…
Promoter_loss.ATAC.reads_CREBBP.KD		0.0482147	CHRNE CIITA MRPL38 RGS1	CHRNE CIITA FAM129C MRPL38 RGS1
Intron_loss.ATAC.reads_CREBBP.KD		2.04552e-47	ACSF3 ADAM29 AP1B1 ATP2A3 CCDC6 CCM2 CD81 CDC25B CXXC5 DBNL FPGS GALNT2 HS1BP3 IRF4 ITPR2 JAK1 KCNJ1 KCNN3 KLF16 LAT2 LIG3 LSM7 MAD1L1 MAVS MYBL2 MYLK OAS2 PDLIM1 PGM1 PLEKHG1 PRMT7 PVRL1 RAD52 RBM38 RGS19 RNGTT SIPA1 SMARCB1 SMC6 ST3GAL1 STARD9 SYK TLE4 TNK2 TRIM14 TTC39C	ACOXL ACSF3 ADAM29 ADORA1 AFF2 ALPK1 ANKRD55 AP1B1 APCDD1 ARHGAP24 ATP2A3 BAG3 BFSP2 CABLES1 CALN1 CARD11 CCDC6 CCDC69 CCM2 CD38 CD81 CDC25B CDK6 CHCHD3 CHST13 CHST15 CLPTM1L CMIP COL9A3 CRADD CUX1 CXXC5 CYTH1 DBNL DFNA5 DLG2 DTX1 EFNA5 ELFN2 EPHA6 ERC2 ETV5 FAM129C FAM53B FAM65B FAM65C FAM69B FARS2 FHIT FPGS GAB1 GALNT2 GAS7 GPM6A GRIK3 HECW2 HIP1 HIPK2 HS1BP3 IRF4 ITGA11 ITPR2 JAK1 KCNJ1 KCNJ12…
Distal_loss.ATAC.reads_CREBBP.KD		1.58954e-16	ACAA2 ACSF3 AKAP2 ARID1B BDH1 BUB3 CACYBP CBX4 CDC7 CIITA CLINT1 CORO1C CXCR4 CYP2W1 CYS1 DBI DERL1 DHFR DLAT DNAJC15 DUS1L DUSP10 DYRK2 EIF4A3 ERAP1 FAF2 FCHSD2 FICD FN3KRP FOXN4 GBE1 GINS1 HERPUD2 HJURP HLA-DQA1 HLA-DRB5 HNRNPD HSPB1 KIF14 KLF2 LIG1 LIMD1 MARCKS MIR148A MKI67 MRPS5 MTIF3 NEK2 NUBP1 PAPOLA PDLIM1 POU2F1 PSAT1 PSMG1 PUS1 PYHIN1 RAB3IP ROCK1 RPP40 SASH3 SBDS SEL1L SEPT9 SNRNP48 SP…	ACAA2 ACSF3 ACVR1 AFF2 AGPAT2 AKAP12 AKAP2 AKIRIN2 ANKRD46 ANXA4 ARID1B ATP8B1 BAK1 BDH1 BDKRB2 BEGAIN BUB3 CABLES1 CACNA2D4 CACYBP CARD11 CBX4 CCRL2 CD28 CD38 CD48 CD83 CDC7 CDK5RAP1 CHRM5 CHSY1 CIITA CLINT1 CORO1C CPNE2 CRNKL1 CUX1 CXCR4 CYP2R1 CYP2W1 CYS1 DAPK1 DBI DERL1 DMXL1 DNAJC15 DNTT DOCK10 DUS1L DYRK2 EFNA5 EIF4A3 ENG ERAP1 FCHSD2 FGD4 FICD FN3KRP GADD45B GADD45G GNA12 GRB7 GRIN2B HBEGF…
Enhancer_loss.ATAC.reads_CREBBP.KD		2.32052e-48	ACAA2 ACSF3 ADAM29 AKAP2 AP1B1 ARID1B ATP2A3 BDH1 BUB3 CACYBP CBX4 CCDC6 CCM2 CD81 CDC25B CDC7 CIITA CLINT1 CORO1C CXCR4 CXXC5 CYP2W1 CYS1 DBI DBNL DERL1 DHFR DLAT DNAJC15 DUS1L DUSP10 DYRK2 EIF4A3 ERAP1 FAF2 FCHSD2 FICD FN3KRP FOXN4 FPGS GALNT2 GBE1 GINS1 HERPUD2 HJURP HLA-DQA1 HLA-DRB5 HNRNPD HS1BP3 HSPB1 IRF4 ITPR2 JAK1 KCNJ1 KCNN3 KIF14 KLF16 KLF2 LAT2 LIG1 LIG3 LIMD1 LSM7 MAD1L1 MARCKS MAVS …	ACAA2 ACOXL ACSF3 ACVR1 ADAM29 ADORA1 AFF2 AGPAT2 AKAP12 AKAP2 AKIRIN2 ALPK1 ANKRD46 ANKRD55 ANXA4 AP1B1 APCDD1 ARHGAP24 ARID1B ATP2A3 ATP8B1 BAG3 BAK1 BDH1 BDKRB2 BEGAIN BFSP2 BUB3 CABLES1 CACNA2D4 CACYBP CALN1 CARD11 CBX4 CCDC6 CCDC69 CCM2 CCRL2 CD28 CD38 CD48 CD81 CD83 CDC25B CDC7 CDK5RAP1 CDK6 CHCHD3 CHRM5 CHST13 CHST15 CHSY1 CIITA CLINT1 CLPTM1L CMIP COL9A3 CORO1C CPNE2 CRADD CRNKL1 CUX1 CXC…
shCrebbp.up_995	3.23568e-05	3.9499e-09	ACSL4 ADNP AHCTF1 ANKRD12 ANKRD33B APC ARID1A ARID2 ASB1 ASXL2 ATAD2B ATL3 ATXN7 BIRC6 BRWD1 CAMK4 CBFA2T3 CBLB CCDC82 CCDC88C CDK12 CDK13 CDK5RAP2 CELF1 CEP170 CEP192 CEP250 CEP350 CNOT6L COQ9 COX15 CREB1 CSNK1G3 CSPP1 CUL4B CUTC DCAF17 DDX17 DDX20 DDX6 DIDO1 DNAJC3 DOCK2 EFCAB4A ELAVL1 EP300 ERBB2IP ERC1 ERLIN1 ETAA1 ETNK1 FAM178A FANCM FCHSD2 FOXN3 FUK FYCO1 GLCCI1 GOLGA3 GOLGA4 GPR160 GRK4 GS…	ADARB1 ADARB2 ADNP AFF1 AIM2 AKAP9 ANKRD11 APBB1IP ARID1A ARID2 ASAP1 ASB1 ASXL2 BACH2 BCL2L1 BIRC6 CAMK4 CBFA2T3 CBLB CCDC88C CD28 CD93 CDK5RAP2 CELF1 CELF2 CEP192 CEP350 CHD7 CLASP1 CLCN5 CNOT6L COQ9 CRB2 CRTC3 CRYBG3 CSPP1 CUL4B CUTC DDX17 DGKD DIDO1 DMXL1 DNAJC3 DOCK2 DYNC1H1 ELF4 ENAH ERC1 ERN1 ETAA1 ETNK1 EVI5 FAM53B FBXW11 FCHSD2 FNBP1 FOXN3 FYCO1 GATAD2B GCC2 GIGYF1 GPR160 HIPK2 HIRA HIVE…
shCrebbp.down_1028	1.11363e-27	1.38992e-14	ABCF3 ACSF3 ACTB ACTR6 AIFM1 ALDH16A1 ALDOA ANP32A APRT ARPC1B ARPC5L ATP5G2 ATP5H ATXN10 B2M BAX BLCAP BTBD1 BUB3 CALR CCDC25 CD81 CDCA8 CEP63 CFL1 CHCHD2 CMTM7 COG8 COMMD4 COPS3 CORO1A COX6B1 COX8A CSNK1E CTBP1 CXCR4 CYBA DALRD3 DAP3 DAZAP1 DBI DBR1 DCTN5 DDX39 DEF6 DERA DRAP1 DYNLL1 ECSIT EEF1A1 EEF1D EIF1 EIF3K EIF4A3 ELL3 EMG1 EXOSC8 FAIM3 FAM136A FAM167A FAM3A FUBP3 GAA GAPDH GAS5 GEMIN4 GE…	ACSF3 ACTG1 ALDOA ANP32A APRT ARHGDIB ARPC1B ARPC5L ATP5G2 ATP5H ATP5O ATXN10 B2M BAX BLK BTBD1 BUB3 CCDC25 CCDC69 CCRL2 CD48 CD79B CD80 CD81 CDCA8 CEP63 CFL1 CHCHD2 CHCHD3 CHMP4B CMTM7 COG8 COMMD4 COPS3 CORO1A COTL1 COX6B1 COX8A CSNK1E CTBP1 CXCR4 CXCR5 CYBA DALRD3 DAZAP1 DBI DDIT4 DDX39 DEF6 DERA DHRS7B DSCR3 DTX1 ECSIT EEF1A1 EEF1D EEF1G EIF1 EIF4A3 ELL3 ELOVL5 ERCC1 FAM136A FAM3A FBXL14 FRMD8…
shEp300.up_783	0.0272947	2.96293e-05	ACACA ACSL4 ADNP AKAP10 ARID1A ARID2 ARNT ASB1 ASXL1 ATAD5 ATL3 ATP2A2 BIRC6 BLM BRWD1 CBFA2T3 CCAR1 CDC25B CDK12 CDK13 CDK5RAP2 CDR2 CELF1 CEP170 CEP350 CEP76 CHAD CNOT6L CREB1 CSAD CSPP1 CUTC DDX17 DDX6 DIDO1 EBF1 ERBB2IP ETAA1 ETNK1 FAM20B FAM76B GLCCI1 GOLGA3 GOLGA4 GSK3B HECTD1 HIRA IMPAD1 INTS12 ITCH ITGA4 ITPR2 KTN1 LNPEP LRBA LRCH3 LRP6 LRRC14B LRRC58 MAP3K12 MAPK1IP1L MASTL MBP MBTD1 MDC…	ADARB1 ADNP AKAP10 AKAP9 ANKRD11 APP ARID1A ARID2 ASAP1 ASB1 ATP2A2 BACH2 BCL2L1 BIRC6 BLM CBFA2T3 CCAR1 CD28 CDC25B CDK5RAP2 CDR2 CELF1 CELF2 CEP350 CHAD CHD7 CLASP1 CNOT6L CRAMP1L CRTC3 CSPP1 CUTC DDX17 DGKD DIDO1 DMXL1 DYNC1H1 EBF1 EIF2AK1 ELF4 ENAH ETAA1 ETNK1 FAM20B FAM53B FAM76B GCC2 GFOD1 GIGYF1 HIPK2 HIRA HIVEP1 HUWE1 IDS IKZF3 IMPAD1 ITCH ITGA4 ITPR2 KTN1 LARP1 LNPEP LRBA LRRC58 MACF1 MA…
shEp300.down_636	1.04786e-18	1.48385e-10	ACOT7 ACTB ALDOA ALG8 ARF1 ARPC1B ATF4 ATP5G2 ATP5G3 B2M BAX CALR CCT2 CD81 CDCA8 CEP63 CFL1 COPS3 CORO1A COX6B1 COX8A CYBA DERL1 DKC1 DNAJA1 DYNLL1 ECSIT EEF1A1 EEF1D EIF3K EIF4A1 EIF4A3 ELL3 EMG1 EXOSC8 FAIM3 FAM136A FBXO22 FEN1 GAA GAPDH GAS5 GET4 GPSM3 GTF2A2 GTPBP3 H2AFZ HCFC1R1 HIST1H3D HIST1H3E HNRNPA2B1 HSP90AA1 HSPA8 HSPB1 HSPH1 HTRA2 IRF5 JMJD6 JUNB KDM6A KLHDC4 KTI12 LTA4H MANF MAT2A M…	ACTG1 ALDOA ALG8 ARF1 ARHGDIB ARPC1B ATP5G2 ATP5G3 ATP5O B2M BAX BLK CADM1 CCDC69 CCT2 CD48 CD79B CD81 CDCA8 CEP63 CFL1 CNR2 COPS3 CORO1A COX6B1 COX8A CXCR5 CYBA DERL1 DKC1 DNAJA1 ECSIT EEF1A1 EEF1D EEF1G EIF4A1 EIF4A3 ELL3 ERCC1 FAM136A FBXO22 GAA GAPDH GNB2L1 GTF2A2 GTPBP3 H2AFZ HIST1H2BJ HIST1H4B HSP90AA1 HSPA8 HSPB1 HSPH1 HTRA2 IER2 IFNGR2 IRF5 JMJD6 KLHDC4 MANF MIF MRPL14 MRPL4 MTHFD1 MTX2 N…
c1.Crebbp.down_397		6.77177e-05	ACY3 ARID3A C1ORF228 CAMK4 CASP8AP2 CD27 CXXC5 DNAJB4 DOK3 DPYD DUSP2 EGR1 FAM167A FAM24B FUCA2 HPCAL1 KIAA0182 LAX1 LCK LRRC33 LRRC56 MIR1281 MYBPC2 NAB2 NFKBID NR3C2 NR4A1 PARP15 PDCD1 PDCD4 PTCH1 PTCRA PTPN7 RILPL2 RNASE4 SERPINI1 SKAP1 SLC12A7 SNORD75 ST3GAL1 TLR9 ZNF718	ABCG1 ACY3 AFF1 ANXA4 APP ARID3A ATXN1 BAG3 BCL9L BFSP2 BHLHE40 BHLHE41 C1ORF228 C20ORF103 C21ORF7 C7ORF50 CAMK4 CASP8AP2 CCR7 CD27 CD48 CXXC5 DMD DNMBP DPYD DUSP2 EGR1 EGR4 ENTPD1 FAM24B FAM65A HDAC9 HPCAL1 IER2 INF2 INPP5A ITGB7 KIAA0182 KIAA1274 LAX1 LHFP LRRC33 LRRC8C MACF1 MS4A6A MYBPC2 NFKBID NNMT PDCD4 PHF16 PLXNC1 PREX1 PRKCH PTCH1 PTP4A3 PTPN6 PTPN7 PTPRK RASA3 RENBP RIN3 SELL SERPINB6 S…
c1.Ep300.up_381	6.87345e-09	0.00575294	AP1M1 AP4S1 ATF5 ATP6V0B BAX BCS1L C11ORF68 C17ORF90 C6ORF1 CD2BP2 CD59 CD99L2 CHCHD10 CIITA COX8A DHRS4L2 DHX58 E4F1 FAM100A FAM57A FANCL GMFG HAUS5 HAUS7 HCFC1R1 HLA-DPB1 HM13 HMOX2 HS2ST1 HSD17B8 INO80E ISG20 KIAA1609 KTI12 LOC100009676 LOC147727 LOC202781 LOC255512 MAEA MESDC1 MFSD3 MRPL34 MRPS34 MVK MYL6 NAGA NBR2 NDUFA3 NDUFS6 NDUFS8 NDUFV1 NHEJ1 NME3 NMRAL1 NRSN2 PCCB PIF1 PIGU PLEKHJ1 PPP…	ACTG1 AP1M1 AP4S1 APBB2 BAX BCL2L1 BCS1L C11ORF68 C16ORF91 C17ORF90 C21ORF33 C6ORF1 CD2BP2 CD59 CELSR3 CIITA COX8A DHRS4L2 E4F1 FAM57A FLJ39653 HAUS5 HAUS7 HIPK2 HLA-DPB1 HM13 HS2ST1 IL4R ISG20 KIAA1609 LOC388499 NDUFS6 NDUFS8 NDUFV1 NHEJ1 NRSN2 PCCB PICK1 PIF1 PPP5C PRCD PRR14 PTPRCAP QSOX1 RANGRF RASSF1 RGS9 RNH1 SCPEP1 SLC43A1 SLMO1 SMAP2 SOLH TELO2 TFAP4 THAP7 TMED9 TMEM134 TMEM223 TRAF7 TRPV…
c1.Ep300.down_692	2.2739e-10	4.91642e-13	ACSL4 ACY3 ADAM15 AHCTF1 AMD1 ARID3A ARL5B ATAD2 ATL2 AZIN1 BRCA2 BTBD19 BUB1 C11ORF82 C15ORF42 C1ORF228 C2ORF76 C3ORF58 C9ORF100 C9ORF140 CCDC122 CD63 CDC25A CDC6 CDKN2AIP CDNF CENPF CKAP2L CREB3L2 CSPP1 CTDSPL2 CXCR4 DLG4 DNAJB14 DNAJB4 DNAJB9 DOK3 DTL DTX4 DUSP10 E2F8 EEA1 EIF1AX EIF5 ESCO2 ESPL1 FAIM3 FAM117B FAM167A FANCB FBXO5 FCRLA FUCA2 GEN1 GPAM HJURP HPCAL1 HSP90B1 HSPD1 HSPH1 IFT122 IG…	ACY3 ADAM15 AEBP1 AFF1 AK1 ARHGAP26 ARID3A ARL5B ATL2 AZIN1 BAG3 BEGAIN BFSP2 BHLHE40 BTBD19 BUB1 C11ORF82 C15ORF33 C18ORF1 C1ORF228 C7ORF50 C9ORF100 CCDC122 CD83 CD9 CDC25A CDC6 CDKN1A CDKN2AIP CENPF CKAP2L CLASP2 CRB2 CREB3L2 CSPP1 CXCR4 DNAJB9 DNMBP DPEP2 DTL EEA1 EIF1AX ELF1 ENTPD1 ESCO2 ESPL1 FAM108B1 FANCB FBXO5 FCRLA FUT8 GADD45G GEN1 GPAM HBEGF HDAC9 HIVEP1 HJURP HK2 HPCAL1 HSP90B1 HSPH1 …
c3.Crebbp.up_500		0.0416162	AMZ2P1 BRWD1 EBF1 EFCAB5 EHMT2 ELL3 IQCD MAGED1 NCOR1 NEIL1 PNN RSF1 SCRN1 SEL1L3 SOD1 SSBP2 TCL6 TNKS TOB2 VPREB3 ZNF318 ZNF652	AFF2 AUTS2 BACH2 BLK CD79B CDK14 CHD7 CRB2 DTX1 EBF1 EEPD1 EFCAB5 ELL3 GH1 IQCD KIAA1211 LY86 MAGED1 MAML3 MGAT5 MME MSI2 NEIL1 PNN RNFT2 RSF1 SCRN1 SEL1L3 SNTA1 SORL1 SPAG16 STRBP TCL6 TOB2 ZNF652
crebbp.ly7.enhancer	8.59241e-85	0	AARSD1 ABCA11P ABCB9 ACADM ACBD3 ACSF3 ACTB ACTL6A ACY3 ADA ADAM29 ADIPOR2 ADK ADNP ADPRHL1 AFMID AFTPH AHCYL1 AIM1 AIMP2 AIP AKAP11 AKAP2 AKT1S1 ALDH3B1 ALOX5 AMMECR1 AMZ2 AMZ2P1 ANAPC11 ANAPC13 ANAPC7 ANG ANKRD12 ANKRD13A ANKRD33B ANP32A ANP32B ANP32E ANXA11 AOX2P AP1B1 AP1M1 AP4S1 APC APOBEC3G APOLD1 ARAP2 ARF1 ARF6 ARFGAP3 ARHGAP19 ARHGAP31 ARHGDIA ARID1A ARID1B ARIH2 ARL1 ARL3 ARL6IP6 ARPC1B…	AACS ABCA11P ABCC1 ABCC6 ABCC8 ABCG1 ABHD12B ABHD15 ABLIM2 ABR ACBD3 ACOXL ACSBG2 ACSF2 ACSF3 ACTL6A ACY3 ADA ADAM10 ADAM19 ADAM29 ADAM32 ADAMTS13 ADAMTS18 ADAMTS7 ADAP1 ADARB1 ADARB2 ADIPOR2 ADK ADNP ADPRHL1 ADRBK1 AEBP1 AFF1 AFF2 AFTPH AHCYL1 AHDC1 AIM1 AIM2 AIP AK1 AKAP11 AKAP2 AKAP4 AKIRIN2 AKNA AKT1S1 ALDH3B1 ALOX5 ALOX5AP ALPI ALPK1 AMMECR1 AMZ2 ANAPC7 ANKRD11 ANKRD16 ANKRD46 ANP32A ANP32B …
crebbp.ly7.prom	2.38278e-182	1.03459e-105	ABCA11P ACO2 ACSF3 ACTB ACTR6 ACY3 ADAT3 ADK ADNP AFMID AFTPH AGPAT1 AIFM1 AIM1 AK2 AKAP2 AKT1S1 ALDH16A1 ALDH3B1 ALDOA ALG5 ALOX5 AMD1 AMMECR1 ANAPC13 ANAPC7 ANG ANGEL2 ANKRD12 ANKRD13A ANKRD13D ANP32A ANP32E AOX2P APAF1 APLF APOLD1 ARF6 ARFGAP2 ARHGAP1 ARHGAP11A ARHGAP11B ARHGAP19 ARID1B ARID2 ARIH2 ARL5B ARL6IP6 ARMC1 ARPC5L ASPM ASXL1 ASXL2 ATAD2 ATAD2B ATF4 ATF5 ATG16L2 ATG2A ATP13A1 ATP5F1 …	ABCA11P ABCC1 ABCG1 ACSF3 ACY3 ADAM10 ADAMTS13 ADK ADNP ADRBK1 AFF1 AFF2 AFTPH AIM1 AIM2 AK2 AKAP2 AKIRIN2 AKNA AKT1S1 ALDH3B1 ALDOA ALG5 ALOX5 ALOX5AP ALPK1 AMMECR1 ANAPC7 ANGEL2 ANKRD11 ANP32A AOX2P APBB1IP APBB2 APOLD1 ARF6 ARHGAP1 ARHGAP19 ARHGAP24 ARHGDIB ARID1B ARID2 ARIH2 ARL5B ARL6IP6 ARMC1 ARPC5L ARSB ARSG ASXL2 ATG16L2 ATG2A ATP13A1 ATP5G3 ATP5J AURKB AVEN AZIN1 B2M B3GNT7 BACH2 BAP1 BA…
ENHANCER ACTIVITY LOSS GENES IN GCB		6.08078e-07		ABHD15 ADK ADSS AFF1 AK1 ARID1B ARL4C BCL11A C1GALT1 CD83 CDCA7L CDK14 CELF2 CHD7 CHSY1 CLLU1 CMTM7 CORO1C CREB3L2 CXCR4 CYFIP2 DMD DOCK10 DPEP2 EIF1 EML4 EMP1 ENG EPS15L1 FBRSL1 FBXO15 FOXP1 FYB GAB1 GADD45B GAS7 GNG7 HDAC9 HK2 HMBOX1 HSPG2 ID3 IDS IRF4 ITGA4 JUN KDM4B KLF13 KLF2 LCLAT1 LCN8 LGMN LIMS2 LIX1 LY86 MGAT5 MOV10 NDUFA4L2 P2RY10 PFKP PKP4 PLXNC1 POLR3K PWWP2B RASSF5 RIN3 RSEH2B RNF125…

## Sheet: Tab3
Tab 3: Enriched pathways in top downregulated genes in mouse vavP-Bcl2/CrebbpKD tumor cells compared to control cells.
Pathway Name	BH corrected p value of mouse.shCREBBP.dn.1000	Overlapping genes of mouse.shCREBBP.dn.1000
B_cell_up_anergy	0.000246658	CD72 EGR1 EGR2 LCK TGIF1
CD40_upregulated_Burkitt_lymphoma	0.0189016	ICAM1 IER3 IFI30 NFKB2 NFKBIA TNF TRAF1
CNS_Node1661	0.0289696	DKK3 HSPA12A MCAM MYO10 NBL1 RPS6KA2 TTC23
Cell_cycle_Cho	0.0112066	ACTN1 CSGALCT2 DGKG EGR1 EMR1 HSPA2 HSPA5 ID3 IER3 IL10 IMMT INSIG1 MRPS6 NID2 NR1D2 RGS3 RGS4 SQSTM1 TEF TSSC4 TTC17
Cell_cycle_Whitfield	0.00179028	AGPAT3 AMD1 BAG3 BAIAP2 CDC42EP4 CREBZF DJB1 DJB4 DJB9 DUSP4 EBI3 FAM178A GATA2 IL10 IVNS1ABP KANK2 MCAM NUDT4 PCF11 PC RGS3 RRP1 SEC62 SFPQ SMC4 TRA2A USP6NL WSB1
Dendritic_cell_CD123pos_blood	0.020692	CXCR3 GGA2 IGF2R INTS6 ITM2C ITPR2 MED26 MREG PTCRA SLC20A1 SLC5A3 SORL1 WWOX XBP1
Glutamine_Glucose_starve_both_down	0.020692	AMD1 DDX3X DJA1 EEF1E1 ETF1 HSP90AA1 HSP90AB1 HSP90B1 HSPA5 HYOU1 ID2 IFI30 MMP15 PIK3CG SIT1 SLC35E2 XBP1
Glutamine_starve_down	0.000407375	AMD1 CALR DJA1 DJB1 EEF1E1 ERH FKBP2 HSP90AA1 HSP90AB1 HSP90B1 HSPA5 IFI30 MMP15 ODC1 PIK3R2 SFPQ SSB XBP1
HRAS_overexpression_2x_up	0.00197947	DUSP4 EGR1 FOSL1 IER3 IL1A MAST4 NFKBIZ ODC1 PHLDA1 PPP1R15A SLC20A1 TOB1
HRAS_overexpression_4x_up	0.0011062	DUSP4 EGR1 FOSL1 IER3 IL1A ODC1 PHLDA1 PPP1R15A SLC20A1
IL6_Ly10_Up_all	0.033563	EGR2 ID2 IL10 IL2RB
IRF4_myeloma_induced_Lymphochip	0.0440731	DJB9 HSP90AA1 HSP90B1 INSIG1 ITPR2 SEC62 TNFRSF17
KRAS_Down	0.0112308	DUSP4 FOSL1 ODC1 PHLDA1 SEC62 SEMA6B
Leucine_starve_down	0.000133594	AMD1 CALR DJA1 ERH ETF1 FKBP2 GGA2 HSP90AA1 HSP90AB1 HSP90B1 HSPA5 MMP15 NBL1 SSB
Lymph_node_DLBCL	0.00179028	ACTN1 CD81 CXCL10 ICAM1 IFI30 IGF2R IL2RB MCAM PLAU SIRPA STX11
Lymph_node_DLBCL_survival	0.0342952	ACTN1 PLAU
Monocyte_4x_U133plus	0.0102072	ALDH3B1 ATP13A3 CCRL2 CXCL16 EMR1 FFAR2 ICAM1 IL1A MYO10 NINJ1 SEMA6B SIRPA TMEM51
Myc_ChIP_PET_2plus	0.00179028	ABTB2 ACTN1 AGPAT3 AHCYL2 AIM1L ALDH3B1 ATF6 B9D2 CBX6 CD81 CDC42EP4 CEBPA CPE DAPK2 DDX3X DGKG DJA1 DJB11 DNM3 EGR4 ETNK1 FAH FKBP2 FOXP2 GABPB1 GALNT2 GPR55 GRB7 GRWD1 GTF2F2 HSP90B1 HSPA5 HSPB1 HTRA2 HYOU1 ICAM1 ID3 IFI30 INSIG1 ITGB1 ITPR2 JMJD6 KCNH6 LILRB4 MAP1LC3A MAST1 MAST4 MATK MED26 MRPS6 MYO1D NFATC1 NFKB2 NR1D1 NRARP PAIP2B PELO PHF20 PIK3CG PLK3 POLR3G PRKCE PRLR PTCRA RAB11FIP1 RAD…
Myc_ChIP_PET_3plus	0.044593	ALDH3B1 DJA1 DJB11 EGR4 ETNK1 GABPB1 HYOU1 ID3 INSIG1 KCNH6 MED26 NR1D1 PIK3CG RAB11FIP1 RNF122 ST3GAL5 TRIO
Myc_ChIP_PET_Expr_Down	0.0494632	DAPK2 ICAM1 ITPR2 LILRB4 NFATC1 NFKB2 PRKCE SORL1 ST3GAL5 TRAF1 TTC17
Myc_overexpression_1.5x_up	0.031528	AGPAT5 BID HSPA1A HSPD1 NUFIP1 SNHG1
NFKB_K1106	0.00263628	ICAM1 NFKBIA TNF TRAF1
NFkB_all_OCILy3_Ly10	1.03427e-05	CXCL10 EBI3 ICAM1 ID2 IL10 INSIG1 NFKB2 NFKBIA TNF TRAF1
NFkB_bothOCILy3andLy10	1.22274e-06	CXCL10 EBI3 ICAM1 ID2 INSIG1 NFKB2 NFKBIA TNF TRAF1
Notch_T-ALL_up_Sharma	0.0280293	EGR1 GRWD1 PPAN PTCRA
PMBL_HL_high	0.0115449	ACTN1 ICAM1 IER3 NFKB2 NFKBIA TRAF1
Resting_monocyte_GNF		ALDH3B1 CEBPA GAS7 IFI30 MTMR11 NINJ1 RAB20 SIRPA
STAT3_up_OCILy10	0.00943962	ID2 IL10 IL2RB PHLDA1 TANK
TGFbeta_down_epithelial_large	0.0342952	CITED2 ID2 ID3
TGFbeta_down_epithelial_small	0.00783514	CITED2 ID2 ID3
Tcell_PIind4x_Feske_Fig4	0.00219519	BAG3 GEM IER3 IL10 INSIG1 NFKBIA ODC1 TNF
Tcell_PIind4x_Feske_Fig6	0.00488535	CD72 GEM ICAM1 IER3 IL10 NFKBIA ODC1 TNF
Tcell_PIind_CalciumDefPtdown4x_Feske_Fig6	0.0270015	CD72 GEM IER3 IL10 NFKBIA TNF
NFkB_Targets	0.000407375	CXCL10 HMOX1 ICAM1 IER3 IL10 IL1A NFKB2 NFKBIA NFKBIZ PLAU TNF TRAF1
NFkB_Targets_Young.Lab	0.0011062	C2 CXCL10 HMGN1 ICAM1 IER3 IL10 IL1A NFKB2 NFKBIA NFKBIZ PIGR PLAU TNF TRAF1
Myc_Targets	0.00132841	AMD1 ATF6 CALR CCT7 CEBPA CNTN2 DJA2 DJB1 EEF1E1 EIF4B ETF1 FAH FKBP2 FOSL1 GPR4 HMOX1 HSPA1A HSPD1 ICAM1 ID2 ID3 IFI30 IGF2R ING1 ITGB1 MAFF MMP15 NCBP2 NFAT5 NFKBIL1 NR1D1 NUFIP1 ODC1 PCF11 PC PQBP1 PSEN2 RPS6KA2 SLC20A1 SPC1 SQSTM1 SSB
BACH2_target_ChIPseq	4.03734e-06	AGPAT3 AGPAT5 ATF6 BAIAP3 BCCIP C2 CBX6 CCDC85B CCDC94 CD72 CD81 CITED2 CPEB4 CREBZF CSGALCT2 CXCR3 DAPK2 DDX3X DGKG DJB11 DJB4 DJB9 DJC25 DSE1L3 EEF1E1 EGR2 EGR4 EIF4B ENC1 ENDOD1 ERH ETF1 FAM167A FAM83G GABPB1 GATA2 GEM GPR19 HEXIM1 HIST1H4A HOMER1 HSP90AB1 HSP90B1 HSPB1 HSPD1 HTATIP2 ICAM1 ID2 ID3 IFT172 INPP5D INSIG1 INTS6 ITPKC ITPR2 IVNS1ABP KATL1 KDM2B LCK LETM2 LOXL3 MAFF MAST1 MAST4 MATK…
NB_GCB_Progression_All_Genes_RPKM_plus2	0.0131019	ABTB2 ART3 BAG3 CCDC12 CD81 CITED2 DUSP4 EGLN2 EGR1 GPR55 ID3 IL10 IL2RB IMMT ITGB1 LONRF1 MREG MYO1D NFAT5 NFKBIA NINJ1 NUFIP1 PAPD5 PLCG1 PLCH1 PNPLA8 RAB11FIP1 RASSF4 RGS3 SEMA6B SLC23A2 SPCS2 TANK TNFRSF17 TRIM7 UCHL5 WWOX XKRX ZFAND2A ZPBP2
GCB_BCL6SMRT_Distal_Enhancer	0.0311149	CPEB4 DUSP4 EGR2 FFAR2 HMOX1 ID2 IL10 ITPR2 MREG NFKBIA RASSF4 SIRPA SIT1 SLC23A2 SLC9A9 SORL1 TRAF1 TRIO USP6NL WWOX
GC_termDiff_Genes	0.0112066	ACTN1 B3GNT2 BAIAP2 BHLHE40 BHLHE41 CALR CASS4 CBX6 CEBPA CPE CST7 CXCR3 CYFIP1 DKK3 DJB9 EMR1 FKBP2 GALNT2 GMPPB HSP90B1 HSPB1 HYOU1 ID3 IL2RB ITM2C KCNK5 LCK MANF MATK NPTXR PHLDA1 PLAU POR RGS4 SELK SESN1 SIL1 SLC9A9 SQSTM1 STOM TBKBP1 TMEM204 TNFRSF17 TSPAN14 XBP1
GCB.DLBCL_1085_intersectSignature_Matt	4.03734e-06	B3GNT2 B9D2 BAG3 BAIAP2 BCL10 BHLHE40 C2 CASS4 CCDC117 CPEB4 CSGALCT2 CSRNP2 DJA1 DJB1 DJB4 DJB9 EPPK1 GABPB1 GALNT2 GEM HIAT1 HOMER1 HSP90AB1 HSPA1A HSPA1B IGF2R INSIG1 JMJD6 LONP1 MAFF NFAT5 NRARP PCF11 PNPLA8 PPP1R15A RNF122 RRAD SELK SERPINF2 SLC5A3 SQSTM1 TOB1 UBE2A WSB1 XBP1 ZCCHC6 ZFAND2A
GCB.DLBCL_1085_intersectSignature_Huimin	0.0115449	B3GNT2 BAG3 BCL10 BHLHE40 CCDC117 CPEB4 CSGALCT2 CSRNP2 DJA1 DJB1 DJB9 GALNT2 HIAT1 HSP90AB1 HSPA1B IGF2R INSIG1 ITGB1 LONP1 MAFF NF1 NFAT5 PCF11 PNPLA8 PPP1R15A RNF122 SELK SQSTM1 TOB1 TTC17 UBE2A WSB1 XBP1
ly1.promoter.BCL6.all.3140	0.0020502	AGPAT5 AHCYL2 APOLD1 ATF6 B3GNT2 BCCIP CALR CCDC85B CCDC94 CD72 CEP63 CITED2 CREBZF CSPP1 DJB11 DJB4 DJC25 EGLN2 EGR2 GALNT2 GPR19 GSN HEXIM1 HIAT1 HIST1H4A HSP90AB1 HSP90B1 HSPB1 HSPD1 ICAM1 ID2 ID3 IFT172 IL10 ING1 INPP5D INTS6 ITGB1 ITPKC ITPR2 IVNS1ABP JMJD6 KDM2B LCK LONP1 LYPLA1 MIRLET7I MMP15 MPHOSPH8 NFKBIA NFKBIZ NUDT4 PC PEX1 PIK3CG PLCG2 PQBP1 PRKCE RAB4B RCSD1 RGS3 RGS4 RHOQ RPS6KA2 R…
ly1.promoter.BCL6-SMRT.all.451	0.0348476	B3GNT2 CD72 EGR2 HEXIM1 HSP90B1 HSPB1 ID2 IL10 NFKBIA PIK3CG RAB4B RGS3 SLC23A2 SP110 TNFRSF17 TRA2A WDR81
ly1.promoter.BCL6-BCOR.all.2142	0.000457208	AGPAT5 APOLD1 ATF6 B3GNT2 CCDC85B CD72 CEP63 CITED2 CREBZF CSPP1 DJB11 DJC25 EGLN2 EGR2 GALNT2 GPR19 HEXIM1 HIAT1 HIST1H4A HSP90AB1 HSP90B1 HSPB1 HSPD1 ICAM1 ID2 ID3 IFT172 ING1 INPP5D INTS6 ITPR2 JMJD6 KDM2B LCK LONP1 LYPLA1 MIRLET7I MMP15 MPHOSPH8 NFKBIA NFKBIZ NUDT4 PC PEX1 PLCG2 PQBP1 PRKCE RAB4B RCSD1 RHOQ RPS6KA2 RUFY1 SCLT1 SESN1 SLC23A2 SNHG1 SP110 STX11 TGIF1 TNFRSF17 TRA2A TSC22D2 TSSC4…
ly1.promoter.BCL6-BCOR.only.1783	0.00783514	AGPAT5 APOLD1 ATF6 CCDC85B CEP63 CITED2 CREBZF CSPP1 DJB11 DJC25 EGLN2 GALNT2 GPR19 HIAT1 HIST1H4A HSP90AB1 HSPD1 ICAM1 ID3 IFT172 ING1 INPP5D INTS6 ITPR2 JMJD6 KDM2B LCK LONP1 LYPLA1 MIRLET7I MMP15 MPHOSPH8 NFKBIZ NUDT4 PC PEX1 PLCG2 PQBP1 PRKCE RCSD1 RHOQ RPS6KA2 RUFY1 SCLT1 SESN1 SNHG1 STX11 TGIF1 TSC22D2 TSSC4 TTC32 USP37 ZCCHC6
GCB.promoter.BCL6.all.5541	2.11377e-08	ABTB2 AGPAT5 AHCYL2 AMD1 APOLD1 ATF6 BCCIP BCL10 BHLHE41 CAT CBX6 CCDC117 CCDC85B CCT7 CD72 CEP63 CITED2 CREBZF CSGALCT2 CSPP1 CSRNP2 CTDP1 DDX3X DGKG DJA1 DJB9 DJC25 DUSP4 DVL2 EGLN2 EGR1 EGR2 EIF4B ENC1 ETNK1 FAM167A GABPB1 GEM GGA2 GPR19 GTF2F2 HEXIM1 HIAT1 HIST1H4A HOMER1 HSP90AA1 HSP90AB1 HSP90B1 HSPA2 HSPD1 HTRA2 ICAM1 ID2 ID3 IFI30 IFT172 IGF2R ING1 INPP5D INSIG1 INTS6 ITGB1 ITPKC ITPR2 IV…
GCB.promoter.BCL6-BCOR.all.5451	1.26269e-08	ABTB2 AGPAT5 AHCYL2 AMD1 APOLD1 ATF6 BCCIP BCL10 BHLHE41 CAT CBX6 CCDC117 CCDC85B CCT7 CD72 CEP63 CITED2 CREBZF CSGALCT2 CSPP1 CSRNP2 CTDP1 DDX3X DGKG DJA1 DJB9 DJC25 DUSP4 DVL2 EGLN2 EGR1 EGR2 EIF4B ENC1 ETNK1 FAM167A GABPB1 GEM GGA2 GPR19 GTF2F2 HEXIM1 HIAT1 HIST1H4A HOMER1 HSP90AA1 HSP90AB1 HSP90B1 HSPA2 HSPD1 HTRA2 ICAM1 ID2 ID3 IFI30 IFT172 IGF2R ING1 INPP5D INSIG1 INTS6 ITGB1 ITPKC ITPR2 IV…
GCB.promoter.BCL6-BCOR.only.4145	1.53346e-06	ABTB2 AGPAT5 AHCYL2 AMD1 APOLD1 BCCIP BCL10 BHLHE41 CAT CBX6 CCDC117 CCDC85B CCT7 CEP63 CREBZF CSGALCT2 CSPP1 CSRNP2 CTDP1 DDX3X DGKG DJB9 DJC25 DUSP4 DVL2 EGLN2 EIF4B ENC1 ETNK1 FAM167A GEM GGA2 GPR19 GTF2F2 HEXIM1 HIAT1 HIST1H4A HSP90AA1 HSPA2 ID2 ID3 IFI30 IFT172 IGF2R INSIG1 INTS6 ITGB1 ITPKC ITPR2 JMJD6 KATL1 LONRF1 MAML1 MANF MED26 MIRLET7I MIS12 MPHOSPH8 MRFAP1 MRPL50 NFAT5 NFATC1 NFKBIA N…
IKAROS_target_ChIPseq_Young_Ebert_Cell_11	0.0315438	BCL10 BHLHE40 CCDC85B CCDC94 DDX3X EGLN2 EGR1 F11R GABPB1 GRWD1 GTF2F2 HMOX1 HSPA1B HSPD1 HTRA2 ICAM1 JMJD6 MAML1 MATK MRE11A NFATC1 NINJ1 PC RAB20 RPS6KA2 SLC23A2 TGIF1
MEIS1_target_ChIPseq_Ebert_Cell_11	0.0308723	APOLD1 CXCL10 DNM3 EGR2 ERH GTF2F2 IL1A LONRF1 MAML1 MREG MYO10 NUFIP1 PRKCE RASSF4 RPS6KA2 SORL1 SPON1 ST3GAL5 TRIO WWOX
PU.1_target_ChIPseq_Ebert_Cell_11	0.000201188	ACTN1 AGPAT5 AHCYL2 AIM1L ATF6 ATP13A3 B3GNT2 BAIAP3 BID CCDC94 CDC42EP4 CEP63 CYFIP1 DAPK2 DJB4 DNM3 DUSP4 EGR2 EMR1 ENDOD1 ETNK1 F11R FCGR2B GALNT2 GAS7 GSN GTF2F1 GTF2F2 HMGN1 HMOX1 HSP90AA1 HSP90B1 HTRA2 ICAM1 ID3 IGF2R IL1A IL2RB INPP5D ITGB1 ITPR2 IVNS1ABP KCNK5 KIN LCK MAML1 MARCKSL1 MATK MED26 MREG MYO10 MYOF NF1 NFAT5 NFKBIA ODC1 PACSIN2 PCF11 PELO PEX1 PHF20 PIK3CG PIK3R2 PKIG PLCG2 PLC…
PU.1_NB_prom	1.03427e-05	AGPAT3 AHCYL2 ARFIP2 B9D2 BCL10 BHLHE41 CAT CBX6 CCDC94 CCT7 CD72 CDH17 CDK11B CEP63 CITED2 CXCR3 DAPK2 DDX3X DGKG DJA2 DJB11 DJB9 DJC25 DSE1L3 EGLN2 ERH F11R FAM167A FKBP2 GABPB1 GPR19 GPR55 GRWD1 GSN GTF2F1 GTF2F2 HIST1H4A HMGN1 HOMER1 HSP90AA1 HSP90B1 HSPA2 HSPD1 ICAM1 ID3 IL10 ING1 INPP5D INSIG1 ITPR2 IVNS1ABP KATL1 LCK LETM2 LILRB4 MAFF MIRLET7I MTRF1 MYOF NFAT5 NFKB2 NFKBIA NFKBIZ NR1D2 ODC…
PU.1_NB_enhancer	7.35715e-08	ABTB2 AGPAT3 AGPAT5 AMD1 ART3 ATP13A3 B3GNT2 B9D2 BAG3 BAIAP3 BCL10 BHLHE40 BHLHE41 BID CASS4 CAT CBX6 CCDC12 CCDC94 CD81 CDK11B CEP63 CITED2 CPEB4 CSGALCT2 CTDP1 CXCR3 CYFIP1 DAPK2 DDX3X DGKG DJA2 DJB11 DJB9 DSE1L3 DNM3 EGLN2 EGR2 EGR4 ENDOD1 F11R FAM167A FAM178A FAM83G FFAR2 FOXP2 GABPB1 GALNT2 GAS7 GGA2 GPR19 GPR55 GRB7 GSN GTF2F1 GTF2F2 HIAT1 HMOX1 HOMER1 HSP90AA1 HSPD1 ICAM1 ID3 IFI30 IGF2R …
PU.1_NB_all	1.87485e-09	ABTB2 AGPAT3 AGPAT5 AHCYL2 AMD1 ARFIP2 ART3 ATP13A3 B3GNT2 B9D2 BAG3 BAIAP3 BCL10 BHLHE40 BHLHE41 BID CASS4 CAT CBX6 CCDC12 CCDC94 CCT7 CD72 CD81 CDH17 CDK11B CEP63 CITED2 CPEB4 CSGALCT2 CTDP1 CXCL16 CXCR3 CYFIP1 DAPK2 DDX3X DGKG DJA2 DJB11 DJB9 DJC25 DSE1L3 DNM3 EGLN2 EGR2 EGR4 ENDOD1 ERH F11R FAM167A FAM178A FAM83G FFAR2 FKBP2 FOXP2 GABPB1 GALNT2 GAS7 GGA2 GPR19 GPR55 GRB7 GRWD1 GSN GTF2F1 GTF2…
PU.1_CB_prom	0.00021535	AHCYL2 ARFIP2 BCL10 CAT CCT7 CD72 CDH17 CDK11B CITED2 CXCR3 DAPK2 DDX3X DGKG DJA2 DJB11 DJB9 DJC25 DSE1L3 ERH F11R FKBP2 GABPB1 GMPPB GPR19 GPR55 GSN GTF2F1 GTF2F2 HOMER1 HSP90AA1 HSP90B1 HSPD1 ICAM1 ID3 IL10 ING1 INPP5D INSIG1 ITPR2 IVNS1ABP KATL1 LCK LETM2 MIRLET7I MYOF NFKB2 NFKBIA NR1D2 NUFIP1 PCF11 PHF20 PIK3CG PIK3R2 PPAN PPP1R15A PQBP1 RAB11FIP1 RAB4B RCSD1 REST RGS3 RNF170 RNU12 RUFY1 SDH…
PU.1_CB_enhancer	4.9585e-09	ABTB2 AGPAT3 AGPAT5 ART3 ATP13A3 BAG3 BAIAP3 BCL10 BHLHE40 BHLHE41 BID CAT CCDC12 CD81 CDH17 CDK11B CEP63 CITED2 CPEB4 CTDP1 CYFIP1 DAPK2 DDX3X DGKG DJA2 DJB11 DSE1L3 DNM3 EGLN2 EGR2 EGR4 EMR1 ENDOD1 F11R FAH FAM167A FAM178A FAM83G FFAR2 FOXP2 GABPB1 GALNT2 GAS7 GGA2 GPR19 GPR55 GRB7 GSN GTF2F1 GTF2F2 HIAT1 HMOX1 HOMER1 HSP90AA1 HSPD1 ICAM1 ID3 IGF2R IL10 IL1A IL2RB IMMT ING1 INPP5D INSIG1 INTS6 …
PU.1_CB_all	3.4929e-10	ABTB2 AGPAT3 AGPAT5 AHCYL2 ARFIP2 ART3 ATP13A3 BAG3 BAIAP3 BCL10 BHLHE40 BHLHE41 BID CAT CCDC12 CCT7 CD72 CD81 CDH17 CDK11B CEP63 CITED2 CPEB4 CTDP1 CXCL16 CXCR3 CYFIP1 DAPK2 DDX3X DGKG DJA2 DJB11 DJB9 DJC25 DSE1L3 DNM3 EGLN2 EGR1 EGR2 EGR4 EMR1 ENDOD1 ERH F11R FAH FAM167A FAM178A FAM83G FFAR2 FKBP2 FOXP2 GABPB1 GALNT2 GAS7 GGA2 GMPPB GPR19 GPR55 GRB7 GSN GTF2F1 GTF2F2 HIAT1 HMOX1 HOMER1 HSP90AA1…
IKZF1_CB_enhancer	5.57489e-05	AGPAT3 BID CCDC12 CD72 CD81 CDK11B DAND5 DAPK2 DGKG FAM167A GRB7 INPP5D LCK MYO1D NINJ1 NUFIP1 PIK3CG PLCG2 RCSD1 RGS3 SIT1 SLC35E2 TEF WDR81
IKZF1_CB_all	0.000378924	AGPAT3 AHCYL2 BID CCDC12 CCDC85B CCDC94 CD72 CD81 CDK11B DAND5 DAPK2 DDX3X DGKG EGR1 FAM167A GABPB1 GRB7 GTF2F2 HEXIM1 HTRA2 ICAM1 INPP5D LCK MARCKSL1 MVD MYO1D NFKB2 NINJ1 NUFIP1 PC PIK3CG PLCG2 RAB4B RCSD1 RGS3 SIT1 SLC35E2 TEF TTC23 WDR81 ZBTB32
CTCF_NB_enhancer	0.0263306	ABTB2 ACTN1 AGPAT3 AGPAT5 AHCYL2 AMD1 ART3 ATF6 ATP13A3 BAG3 BAIAP2 BAIAP3 BHLHE40 BID CARD6 CAT CBX6 CCDC94 CD72 CDH17 CDK11B CEACAM19 CEP63 CITED2 CNTN2 CPE CPEB4 CRABP2 CTDP1 CXCR3 DAND5 DAPK2 DGKG DKK3 DJA2 DJB1 DJB9 DSE1L3 DNM3 DUSP4 EBI3 EGLN2 EGR2 EIF4B ENC1 ENDOD1 ESPN ETF1 ETNK1 F11R FAH FAM167A FAM178A FFAR2 GABPB1 GALNT2 GAS7 GATA2 GPR19 GPR55 GRB7 GREB1L GSN GTF2F2 HOMER1 HSP90AA1 HSP…
CTCF_NB_all	0.0449216	ABTB2 ACTN1 AGPAT3 AGPAT5 AHCYL2 AIM1L AMD1 AMIGO3 APOLD1 ART3 ATF6 ATP13A3 B9D2 BAG3 BAIAP2 BAIAP3 BHLHE40 BHLHE41 BID CARD6 CAT CBX6 CCDC12 CCDC85B CCDC94 CD72 CDH17 CDK11B CEACAM19 CEP63 CITED2 CNTN2 CPE CPEB4 CRABP2 CREBZF CSPP1 CTDP1 CXCL16 CXCR3 DAND5 DAPK2 DGKG DKK3 DJA2 DJB1 DJB9 DSE1L3 DNM3 DUSP4 EBI3 EGLN2 EGR1 EGR2 EGR4 EIF4B ENC1 ENDOD1 ESPN ETF1 ETNK1 F11R FAH FAM167A FAM178A FFAR2 G…
CTCF_ly1_prom	0.0396578	ACTR8 AGPAT5 AHCYL2 ALDH3B1 AMIGO3 B3GNT2 BAG3 BHLHE40 BHLHE41 CBX6 CCDC85B CCDC94 CCT7 CD72 CD81 CDC42EP4 CITED2 CPEB4 CRABP2 CREBZF CSPP1 DAPK2 DDX3X DSE1L3 EGLN2 EGR1 EGR2 ENC1 ESPN FAM167A FAM196B FOXP2 GALNT2 GAS7 GEM GPR55 GRWD1 GTF2F1 GTF2F2 HMOX1 HSP90AB1 HSPA2 HSPB7 HTRA2 HYOU1 ICAM1 IFT172 IL2RB IMMT ING1 INPP5D ITM2C ITPR2 IVNS1ABP JMJD6 KDM2B KLHL13 LETM2 LONP1 MAP3K6 MARCKSL1 MAST1 M…
CTCF_ly1_all	0.0263306	ABTB2 ACACB ACTN1 ACTR8 AGPAT3 AGPAT5 AHCYL2 AIM1L ALDH3B1 AMD1 AMIGO3 APOLD1 ARFIP2 ART3 ATF6 ATP13A3 B3GNT2 B9D2 BAG3 BAIAP2 BAIAP3 BCL10 BCL2L15 BHLHE40 BHLHE41 BID CARD6 CAT CBX6 CCDC12 CCDC85B CCDC94 CCT7 CD72 CD81 CDC42EP4 CDH17 CDK11B CEACAM19 CEP63 CITED2 CNTN2 CPE CPEB4 CRABP2 CREBZF CSPP1 CST7 CTDP1 CXCL16 CXCR3 CYFIP1 DAND5 DAPK2 DDX3X DGKG DKK3 DJA2 DJB1 DJB11 DJB9 DJC25 DSE1L3 DNM3 D…
P300_ly1_enhancer	0.0189016	BAIAP3 BHLHE41 CAT CCDC12 CD81 CDK11B CPEB4 DAPK2 GALNT2 GRB7 ID2 ID3 ING1 INPP5D KANK2 MAST4 MYO1D NFATC1 NFKBIA PKIG PLCG2 PLCH1 PQBP1 PRKCE RAB11FIP1 RCSD1 RGS3 RPS6KA2 SIT1 SLC23A2 TANK TRAF1 TUBA1C XBP1 ZBTB46
P300_ly1_all	1.87485e-09	ABTB2 AGPAT3 AGPAT5 AHCYL2 AMD1 ARFIP2 ART3 ATP13A3 B3GNT2 B9D2 BAG3 BAIAP3 BCL10 BHLHE40 BHLHE41 BID CASS4 CAT CBX6 CCDC12 CCDC94 CCT7 CD72 CD81 CDH17 CDK11B CEP63 CITED2 CPEB4 CSGALCT2 CTDP1 CXCL16 CXCR3 CYFIP1 DAPK2 DDX3X DGKG DJA2 DJB11 DJB9 DJC25 DSE1L3 DNM3 EGLN2 EGR2 EGR4 ENDOD1 ERH F11R FAM167A FAM178A FAM83G FFAR2 FKBP2 FOXP2 GABPB1 GALNT2 GAS7 GGA2 GPR19 GPR55 GRB7 GRWD1 GSN GTF2F1 GTF2…
Tcell_down_Ebert_cell_11	0.0342952	AGPAT5 BCCIP BID CAT CDC42EP4 CEBPA CYFIP1 EGR1 FAH FCGR2B GAS7 GATA2 HMOX1 HSPA1A HSPA1B IFI30 ITM2C PKIG PLCG2 SIRPA SLC15A2 TMEM51 TRIO TUBA1C USP6NL ZFHX3
Bcell_up_Ebert_cell_11	0.000846773	AGPAT5 BAIAP3 BCL10 BHLHE41 CD72 CD81 CREBZF DJB9 ENC1 FCGR2B GABPB1 GGA2 ING1 INPP5D ITPR2 LONRF1 NFATC1 NR1D2 ODC1 PAIP2B PCF11 PEX1 PKIG PLCG2 PPP1R15A PRKCE RAB4B RBM19 RBM26 RHOQ SFPQ SLC15A2 SLC23A2 SP110 SPON1 SQSTM1 TMEM38B TNFRSF17 TRA2A TRIO TSC22D2 TTC17 UBE2A USP6NL
HSC_e-ERY_up_Ebert_cell_11	0.0333515	ACTR8 AGPAT5 AHCYL2 AMD1 B3GNT2 BCCIP CALR CAT CCT7 CYFIP1 DVL2 EEF1E1 EGR1 ERH ETF1 FAH GABPB1 GALNT2 GATA2 GRWD1 HMGN1 HSP90AA1 HSP90AB1 HSPA1B HSPB1 HSPD1 ITM2C KCNK5 LYPLA1 MARCKSL1 MCAM MREG NBL1 NF1 NUFIP1 ORC1 PC PLCH1 POLR3G SLC39A4 SRSF3 SSB TMEFF1 TMEM38B TUBA1C WWOX XBP1
HSC_e-ERY_down_Ebert_cell_11	0.0263306	CDK11B CXCR3 ENC1 FCGR2B ID2 IFI30 IGF2R IL2RB JMJD6 LCK NFKBIA PPP1R15A RAB4B SIT1 SP110 SQSTM1 ST3GAL5 STK38 TANK TBX21 TOB1
ERY_up_Ebert_cell_11		AMD1 B3GNT2 BCCIP CALR CAT CDC42EP4 CITED2 CPE DJA1 DJA2 DJB4 DNM3 ENDOD1 ETF1 ETNK1 FAH FAM50A HEXIM1 HSPA1B HSPB1 HTRA2 KANK2 KCNK5 NUDT4 ODC1 ORC1 PC PIK3R2 PTCRA RAD23A SEC62 SMC4 STOM TANK TUBA1C
CREBBP.mouse.ChIPseq.LOSS.25.prom	0.00131626	AGPAT5 AMD1 ARFIP2 BHLHE40 CALR CPEB4 CTDP1 DSE1L3 DUSP4 DVL2 FFAR2 HMGN1 HSP90AA1 HSPA1B HSPA2 HSPD1 ID2 INSIG1 KCNK5 LONP1 MAFF MED10 MRPL14 MRPL50 NF1 NFATC1 NR1D2 ODC1 PACSIN2 PLK3 PPAN RBM19 RNU12 SEC62 SPATA2L ZFAND2A ZFP622
CREBBP.mouse.ChIPseq.LOSS.25.enhancer	0.00196056	AHCYL2 ARFIP2 ATF6 BHLHE40 CALR CTDP1 CYFIP1 DSE1L3 ETF1 HSPD1 ITPR2 KCNK5 KDM2B LONP1 MAFF MED10 MIR466F-3 MREG MRPL14 MYOF NFATC1 ODC1 PACSIN2 PKIG PLAU PLCG2 PLK3 PPAN RBM19 REST SEC62 SLC15A2 SPATA2L TANK TMEFF1 ZFAND2A ZFP362 ZFP622
shCrebbp.down_1028	0.000407375	AKR1B3 BCCIP BID CALR CCDC94 CCRL2 CCT7 CD81 CEP63 CST7 CXCR3 CYP4F16 DJA2 DJB1 FAH FAM167A FFAR2 FTL1 GEM GMPPB GRAP GSN HMGN1 HSPB1 IFI30 MARCKSL1 MED11 MRPL14 MYO1H ODC1 PQBP1 RAB4B RCSD1 RPS6KA2 RRP1 SIL1 SNORA7A TNF VMAC
shEp300.down_636	1.33524e-06	AKR1B3 CALR CCT7 CD72 CD81 CEP63 CXCR3 DJA1 DJB1 EMR1 FAH FTL1 GRAP HID1 HSP90AA1 HSP90AB1 HSPA1A HSPB1 HTRA2 ICAM1 IFI30 JMJD6 LILRB4 MANF MRPL14 NFKBIA ODC1 PAIP2B PC SIL1 SNORA7A TANK THUMPD3 TRIM7
mouse.shCrebbp.r2.down_p.500	0	ACTR8 AIM1L ALDH3B1 AMD1 AMIGO3 APOLD1 ART3 ASUN ATP13A3 B9D2 BAG3 BAIAP2 BAIAP3 BHLHE41 BID CALR CAT CCDC12 CCDC85B CCDC94 CDC42EP4 CDH17 CDK11B CEACAM19 CEBPA CEP63 CITED2 CPE CRABP2 CST7 CXCL16 CXCR3 CYFIP1 DAND5 DKK3 DJA1 DJB1 DJB11 DJB4 DJB9 DNM3 EGLN2 EGR1 EGR2 EGR4 ELP4 EMR1 ENC1 EPPK1 ESPN ETF1 ETNK1 FAM114A1 FAM213A FAM50A FCGR2B FOSL1 FTL1 GALNT2 GAS7 GEM GM6297 GM7102 GMPPB GPR19 GPR55…
mouse_shCrebbp.r2.down_545	5.42349e-192	ACTN1 ACTR8 AIM1L ALDH3B1 AMIGO3 APOLD1 ART3 B9D2 BAG3 BCL10 BHLHE40 BHLHE41 CASS4 CCDC117 CCDC85B CCRL2 CD72 CDC42EP4 CEACAM19 CEBPA CITED2 CMSS1 CPE CSRNP2 CST7 CXCL10 CXCL16 CXCR3 DDX3X DKK3 DJA1 DJB1 DJB4 DJB9 DSE1L3 DNM3 EBI3 EGR1 EGR2 EGR4 EMR1 ESPN FAH FAM196B FAM213A FAM83G FCGR2B FFAR2 FKBP2 FOSL1 GAS7 GM6297 GMPPB GP49A GPR19 GPR55 HEXIM1 HID1 HMOX1 HSP90AA1 HSP90AB1 HSP90B1 HSPA12A HSP…
mouse.shCrebbp.r2.0_p.1000_down	0	ABTB2 ACACB ACTN1 ACTR8 AGPAT3 AGPAT5 AHCYL2 AIM1L AKR1B3 ALDH3B1 AMD1 AMIGO3 APOLD1 ARFIP2 ART3 ASUN ATF6 ATP13A3 B3GNT2 B9D2 BAG3 BAIAP2 BAIAP3 BCCIP BCL10 BCL2L15 BHLHE40 BHLHE41 BID C2 CALR CARD6 CASS4 CAT CBX6 CCDC117 CCDC12 CCDC85B CCDC94 CCRL2 CCT7 CD72 CD81 CDC42EP4 CDH17 CDK11B CEACAM19 CEBPA CEP63 CITED2 CMSS1 CNTN2 CPE CPEB4 CRABP2 CREBZF CSGALCT2 CSPP1 CSRNP2 CST7 CTDP1 CXCL10 CXCL16 …
c1.Crebbp.down_397	4.9585e-09	BAG3 BHLHE40 BHLHE41 CD72 CPEB4 CXCR3 DJB1 DJB4 DSE1L3 DUSP4 EGR1 EGR2 EGR4 FAM167A HEXIM1 HMOX1 HSPA1A HSPA1B IL2RB ITGB1 ITM2C LCK LILRB4 PTCRA RASSF4 SLC9A9 SLCO4A1 TBKBP1 TBX21 ZBTB32
c1.Ep300.down_692	1.8676e-09	AMD1 BAG3 BHLHE40 CD72 CPEB4 CSPP1 CYFIP1 DDX3X DJB4 DJB9 DUSP4 ENC1 FAM167A FCGR2B GEM HSP90B1 HSPA1A HSPA2 HSPD1 IGF2R IL10 ING1 INSIG1 INTS6 IVNS1ABP KANK2 MAFF NFAT5 NRARP NUDT4 ODC1 ORC1 PC PHLDA1 PKIG PNPLA8 RAB11FIP1 SEC62 SELK SNHG1 TBX21 TSC22D2
c3.Crebbp.down_500	0.0115449	DGKG DSE1L3 EBI3 EMR1 HOMER1 IVNS1ABP NFKBIZ NUDT4 PLK3 SLCO4A1 ST3GAL5 TBX21 TGIF1 ZBTB32
MD901.loss.25.prom.g	0.00132841	ALDH3B1 AMD1 APOLD1 B3GNT2 B9D2 CALR CCDC85B CD81 CEP63 CITED2 CREBZF CSPP1 CTDP1 DJA1 DJB11 DJB4 DJB9 EGLN2 EGR1 ETNK1 FAM167A FAM178A FKBP2 GABPB1 GALNT2 GMPPB GTF2F1 HIAT1 HMGN1 HSP90AA1 HSP90B1 HSPA5 HSPB1 HSPD1 HTRA2 HYOU1 ID3 IGF2R IMMT ING1 ITPR2 IVNS1ABP JMJD6 KATL1 KDM2B LCK LYPLA1 MANF MAVS MIRLET7I MIS12 MRE11A MRPL14 NFATC1 NFKBIA ODC1 PACSIN2 PC PHF5A PHLDA1 POLR3G PRKCE PTCRA RAD23A…
MD901.loss.25.enhancer.g	0.00382333	ACACB ALDH3B1 APOLD1 B3GNT2 BAG3 BAIAP3 BHLHE40 BHLHE41 CCDC12 CCRL2 CD81 CDK11B CEP63 CITED2 CSPP1 DGKG DJA1 DJB11 DJB9 EGLN2 EGR1 EGR4 ETNK1 FKBP2 GABPB1 GALNT2 GAS7 GRB7 HIAT1 HMGN1 HSP90AA1 HSP90B1 HSPA5 HSPB1 HTRA2 HYOU1 ID2 ID3 IGF2R IMMT INPP5D ITPR2 IVNS1ABP JMJD6 KATL1 KDM2B LYPLA1 MANF MAVS MCAM MRE11A MRPL14 MYOF NFATC1 NINJ1 PC PKIG PLCG2 PLCH1 RAD23A RGS3 RHOQ RPS6KA2 SELK SIT1 SLC39…
MD901.loss.5.enhancer.g	0.0102072	ACACB B3GNT2 BAIAP3 BHLHE41 CD81 CDK11B CEP63 DJB11 EGLN2 EGR1 FKBP2 GALNT2 HIAT1 HSPA5 HSPB1 HTRA2 ID3 IGF2R IMMT ITPR2 IVNS1ABP JMJD6 KATL1 KDM2B MAVS MRPL14 MYOF NFATC1 PC PKIG RPS6KA2 SLC39A4 SLC9A9 SORL1 TEF TGIF1 TRIO ZFAND2A
crebbp.ly7.enhancer	0.000633305	ALDH3B1 APOLD1 ATP13A3 BAG3 BAIAP3 BHLHE41 BID CAT CCDC12 CEP63 CITED2 CXCR3 DNAJB1 DNAJB11 DNAJB9 DNM3 EGLN2 EGR2 EGR4 ENC1 GALNT2 GRAP HMOX1 HSP90AA1 HSP90B1 HSPB1 ID3 IFI30 IGF2R IL10 IL1A ING1 INSIG1 ITPKC ITPR2 KANK2 KATNAL1 KCNK5 KDM2B LILRB4 LONRF1 MAFF MREG MRFAP1 MVD MYO10 MYO1D MYOF NF1 NFATC1 NFKBIA NFKBIL1 NFKBIZ NINJ1 NPR2 NR1D1 ODC1 PAIP2B PCF11 PHLDA1 PIGR PIK3CG PKIG PLCG1 PLCH1 P…
crebbp.ly7.prom	0.0331213	ALDH3B1 AMD1 APOLD1 B9D2 BTD CALR CAT CCDC12 CCDC94 CEP63 CITED2 DNAJB11 DNAJB4 DNAJB9 EGLN2 EGR2 GPR19 GRAP GRWD1 HEXIM1 HSP90AB1 HSP90B1 ID3 ING1 INSIG1 INTS6 ITPR2 LONRF1 MVD NFATC1 NFKBIL1 NFKBIZ ODC1 PAIP2B PCF11 PHF5A PIK3CG PIK3R2 PPP1R15A PSD PTCRA RAB4B RGS3 SEC62 SNORA7A SQSTM1 TANK TNFRSF17 TRAF1 TSC22D2 WDR81
HSA04650_NATURAL_KILLER_CELL_MEDIATED_CYTOTOXICITY	0.0348263	BID ICAM1 LCK NFAT5 NFATC1 PIK3CG PIK3R2 PLCG1 PLCG2 TNF
HSA04660_T_CELL_RECEPTOR_SIGNALING_PATHWAY	0.000437797	BCL10 IL10 LCK NFAT5 NFATC1 NFKB2 NFKBIA PIK3CG PIK3R2 PLCG1 TNF
HSA04662_B_CELL_RECEPTOR_SIGNALING_PATHWAY	1.78801e-06	BCL10 CD72 CD81 FCGR2B INPP5D NFAT5 NFATC1 NFKB2 NFKBIA PIK3CG PIK3R2 PLCG2
APOPTOSIS_GO	0.0485422	BCL10 BID CALR DAPK2 EEF1E1 HSP90B1 HSPA1B HSPB1 HSPD1 HTATIP2 IER3 IL1A IL2RB LCK NF1 NFKBIA PIK3R2 PPP1R15A PRKCE PSEN2 TNF
BIOPOLYMER_METABOLIC_PROCESS	0.00539377	ART3 ATF6 BCL10 CALR CD81 CEBPA CITED2 CRABP2 CTDP1 DAPK2 DUSP4 EGLN2 ELP4 FOSL1 GALNT2 GATA2 GTF2F1 GTF2F2 HEXIM1 HSPA1B HTATIP2 INTS6 IVNS1ABP KIN LCK MAFF MAML1 MAP3K6 MAST1 MATK MED26 MMP15 MRE11A NCBP2 NFAT5 NFATC1 NFKB2 NR1D2 NUFIP1 PHF5A PLK3 POLR3G PPAN PQBP1 PRKCE PSEN2 RAD23A REST SFPQ SQSTM1 SSB STK38 TBX21 TGIF1 TNF TRA2A TSSK6 UBE2A UBN1 ZBTB32 ZFHX3
NEGATIVE_REGULATION_OF_CELLULAR_PROCESS	0.0390324	ACTN1 BCL10 CREBZF EEF1E1 GAS7 GSN HEXIM1 HSP90B1 HSPA1B HSPB1 HTATIP2 ID2 ID3 IER3 IL10 IL1A IL2RB ING1 NF1 NFKBIL1 PAIP2B PIK3R2 PPP1R15A SESN1 TGIF1 TNF TOB1 ZBTB32
NUCLEOBASE__NUCLEOSIDE__NUCLEOTIDE_AND_NUCLEIC_ACID_METABOLIC_PROCESS	0.00119235	ATF6 BCL10 CALR CEBPA CITED2 CRABP2 CREBZF EGR1 ELP4 ERH FOSL1 GATA2 GTF2F1 GTF2F2 HEXIM1 HSPA1B HTATIP2 ID2 ID3 INTS6 IVNS1ABP KIN MAFF MAML1 MED26 MRE11A NCBP2 NFAT5 NFATC1 NFKB2 NR1D2 NUDT4 NUFIP1 PHF5A POLR3G PPAN PQBP1 RAD23A REST SFPQ SLC23A2 SQSTM1 SSB TBX21 TGIF1 TNF TRA2A UBE2A UBN1 ZBTB32 ZFHX3
POSITIVE_REGULATION_OF_BIOLOGICAL_PROCESS	0.0263691	ATF6 BCL10 BID C2 CD81 CDC42EP4 CITED2 CXCL10 DAPK2 DJA2 EBI3 EEF1E1 EGLN2 EGR1 EGR4 FOSL1 GATA2 HMOX1 HSP90AA1 HSP90AB1 HTATIP2 LCK MAML1 MATK NCBP2 NF1 NUFIP1 PHF5A PRKCE SLC20A1 SQSTM1
POSITIVE_REGULATION_OF_CELLULAR_PROCESS	0.031398	ATF6 BCL10 BID CD81 CDC42EP4 CITED2 CXCL10 DAPK2 DJA2 EBI3 EEF1E1 EGR1 EGR4 FOSL1 GATA2 HMOX1 HSP90AA1 HSP90AB1 HTATIP2 LCK MAML1 MATK NCBP2 NF1 NUFIP1 PHF5A PRKCE SLC20A1 SQSTM1
PROGRAMMED_CELL_DEATH	0.0485422	BCL10 BID CALR DAPK2 EEF1E1 HSP90B1 HSPA1B HSPB1 HSPD1 HTATIP2 IER3 IL1A IL2RB LCK NF1 NFKBIA PIK3R2 PPP1R15A PRKCE PSEN2 TNF
REGULATION_OF_APOPTOSIS	0.0482123	BCL10 BID CALR DAPK2 EEF1E1 HSP90B1 HSPA1B HSPB1 HSPD1 HTATIP2 IER3 IL1A IL2RB LCK NF1 PIK3R2 PRKCE TNF
REGULATION_OF_CELLULAR_METABOLIC_PROCESS	2.70263e-05	ATF6 BCL10 CALR CD81 CITED2 CRABP2 CREBZF EBI3 EGR1 EIF4B ELP4 ETF1 FOSL1 GSN HEXIM1 HSP90AA1 HSP90AB1 HSPB1 HTATIP2 ID2 ID3 IL10 MAML1 MED26 MRE11A MTRF1 NFATC1 NFKB2 NR1D2 NUFIP1 PAIP2B PHF5A POLR3G PQBP1 REST SQSTM1 TBX21 TGIF1 TNF UBN1 ZBTB32 ZFHX3
REGULATION_OF_GENE_EXPRESSION	2.70263e-05	ATF6 BCL10 CALR CITED2 CRABP2 CREBZF EBI3 EGR1 EIF4B ELP4 ETF1 FOSL1 HEXIM1 HSPB1 HTATIP2 ID2 ID3 IL10 IL2RB MAML1 MED26 MTRF1 NFATC1 NFKB2 NR1D2 NUFIP1 PAIP2B PHF5A POLR3G PQBP1 REST SQSTM1 TBX21 TGIF1 TNF UBN1 ZBTB32 ZFHX3
REGULATION_OF_METABOLIC_PROCESS	2.70263e-05	ATF6 BCL10 CALR CD81 CITED2 CRABP2 CREBZF EBI3 EGLN2 EGR1 EIF4B ELP4 ETF1 FOSL1 GSN HEXIM1 HSP90AA1 HSP90AB1 HSPB1 HTATIP2 ID2 ID3 IL10 MAML1 MED26 MRE11A MTRF1 NFATC1 NFKB2 NR1D2 NUFIP1 PAIP2B PHF5A POLR3G PQBP1 REST SQSTM1 TBX21 TGIF1 TNF UBN1 ZBTB32 ZFHX3
REGULATION_OF_NUCLEOBASE__NUCLEOSIDE__NUCLEOTIDE_AND_NUCLEIC_ACID_METABOLIC_PROCESS	0.00185918	ATF6 BCL10 CALR CITED2 CRABP2 CREBZF EGR1 ELP4 FOSL1 HEXIM1 HTATIP2 ID2 ID3 MAML1 MED26 MRE11A NFATC1 NFKB2 NR1D2 NUFIP1 PHF5A POLR3G PQBP1 REST SQSTM1 TBX21 TGIF1 TNF UBN1 ZBTB32 ZFHX3
REGULATION_OF_PROGRAMMED_CELL_DEATH	0.0482123	BCL10 BID CALR DAPK2 EEF1E1 HSP90B1 HSPA1B HSPB1 HSPD1 HTATIP2 IER3 IL1A IL2RB LCK NF1 PIK3R2 PRKCE TNF
REGULATION_OF_RNA_METABOLIC_PROCESS	0.0022247	ATF6 BCL10 CALR CITED2 CRABP2 ELP4 FOSL1 HEXIM1 HTATIP2 MAML1 MED26 NFATC1 NFKB2 NR1D2 NUFIP1 PHF5A POLR3G PQBP1 REST SQSTM1 TBX21 TGIF1 TNF UBN1 ZBTB32 ZFHX3
REGULATION_OF_TRANSCRIPTION	0.0010461	ATF6 BCL10 CALR CITED2 CRABP2 CREBZF EGR1 ELP4 FOSL1 HEXIM1 HTATIP2 ID2 ID3 MAML1 MED26 NFATC1 NFKB2 NR1D2 NUFIP1 PHF5A POLR3G PQBP1 REST SQSTM1 TBX21 TGIF1 TNF UBN1 ZBTB32 ZFHX3
REGULATION_OF_TRANSCRIPTION__DNA_DEPENDENT	0.00119235	ATF6 BCL10 CALR CITED2 CRABP2 ELP4 FOSL1 HEXIM1 HTATIP2 MAML1 MED26 NFATC1 NFKB2 NR1D2 NUFIP1 PHF5A POLR3G PQBP1 REST SQSTM1 TBX21 TGIF1 TNF UBN1 ZBTB32 ZFHX3
RESPONSE_TO_BIOTIC_STIMULUS	0.000120279	ATF6 BCL10 CREBZF DJA1 DJB1 DJB4 FOSL1 HSPA1B HSPA2 HSPB1 HSPB7 IL10 IVNS1ABP TNF
RNA_BIOSYNTHETIC_PROCESS	0.000980977	ATF6 BCL10 CALR CEBPA CITED2 CRABP2 ELP4 FOSL1 GATA2 GTF2F1 GTF2F2 HEXIM1 HTATIP2 IVNS1ABP MAFF MAML1 MED26 NFAT5 NFATC1 NFKB2 NR1D2 NUFIP1 PHF5A POLR3G PQBP1 REST SQSTM1 TBX21 TGIF1 TNF UBN1 ZBTB32 ZFHX3
RNA_METABOLIC_PROCESS	0.00030762	ATF6 BCL10 CALR CEBPA CITED2 CRABP2 ELP4 FOSL1 GATA2 GTF2F1 GTF2F2 HEXIM1 HSPA1B HTATIP2 INTS6 IVNS1ABP KIN MAFF MAML1 MED26 NCBP2 NFAT5 NFATC1 NFKB2 NR1D2 NUFIP1 PHF5A POLR3G PPAN PQBP1 REST SFPQ SQSTM1 SSB TBX21 TGIF1 TNF TRA2A UBN1 ZBTB32 ZFHX3
TRANSCRIPTION	0.00083726	ATF6 BCL10 CALR CEBPA CITED2 CRABP2 CREBZF EGR1 ELP4 FOSL1 GATA2 GTF2F1 GTF2F2 HEXIM1 HTATIP2 ID2 ID3 IVNS1ABP MAFF MAML1 MED26 NFAT5 NFATC1 NFKB2 NR1D2 NUFIP1 PHF5A POLR3G PQBP1 REST SQSTM1 TBX21 TGIF1 TNF UBN1 ZBTB32 ZFHX3
TRANSCRIPTION__DNA_DEPENDENT	0.000780966	ATF6 BCL10 CALR CEBPA CITED2 CRABP2 ELP4 FOSL1 GATA2 GTF2F1 GTF2F2 HEXIM1 HTATIP2 IVNS1ABP MAFF MAML1 MED26 NFAT5 NFATC1 NFKB2 NR1D2 NUFIP1 PHF5A POLR3G PQBP1 REST SQSTM1 TBX21 TGIF1 TNF UBN1 ZBTB32 ZFHX3
GLYCEROPHOSPHOLIPID_METABOLISM	0.0439657	AGPAT3 DGKG ETNK1 LYPLA1 PLCG1 PLCG2
HSA04650_NATURAL_KILLER_CELL_MEDIATED_CYTOTOXICITY	0.0316166	BID ICAM1 LCK NFAT5 NFATC1 PIK3CG PIK3R2 PLCG1 PLCG2 TNF
HSA04660_T_CELL_RECEPTOR_SIGNALING_PATHWAY	0.000523832	BCL10 IL10 LCK NFAT5 NFATC1 NFKB2 NFKBIA PIK3CG PIK3R2 PLCG1 TNF
HSA04662_B_CELL_RECEPTOR_SIGNALING_PATHWAY	1.88079e-06	BCL10 CD72 CD81 FCGR2B INPP5D NFAT5 NFATC1 NFKB2 NFKBIA PIK3CG PIK3R2 PLCG2
IL10PATHWAY	0.0316166	HMOX1 IL10 IL1A TNF
LAIRPATHWAY	0.0423966	ICAM1 IL1A ITGB1 TNF
ST_T_CELL_SIGNAL_TRANSDUCTION	0.0316166	LCK NFAT5 NFKB2 NFKBIA NFKBIL1 PLCG1
ENHANCER ACTIVITY LOSS GENE IN GCB	0.0236795	CCR6 CD74 CDK14 CELF2 CREB3L2 DYRK4 GAS7 ID3 MATK MPEG1 MYADM OPTN P2RY14 PDE8A RAB20 RILPL2 UBAC2 YPEL2 ZBTB20

## Sheet: Tab4
Tab 4: Enriched pathways in top downregulated genes in human lymphoma CREBBP KD MD901 cells compared to scramble KD cells.
Pathway Name	BH corrected p value of MD901.dn.500	Overlapping genes of MD901.dn.500
Blimp_proliferation_repressed	1.01868e-09	ACTB CYFIP2 DNMT1 GMPS GOT2 IFI16 IKZF1 MCM2 MCM4 MYBL2 PKMYT1 PRKDC TUBG1
BreastCa_70gene_Bad	0.00956393	DIAPH3 FLT1 GMPS MCM6
CD8_T_effectorUp_memoryIm_NaiveDn	0.0291091	EFHD2 H2AFX IFI16
Cell_cycle_Cho	2.35298e-07	AP1M1 CANT1 CCNF CDCA7 CHAF1B ELOVL6 FLT1 GPI H1FX H2AFX HGS IKZF1 ITGA6 KIF11 MAT2A MCM4 MCM6 MTHFD1 PASK PKMYT1 PRKDC RSEH2A SLC29A1 UHRF1
Cell_cycle_Cho&Whitfield	2.66987e-06	CCNF CDCA7 CHAF1B H2AFX KIF11 MCM4 MCM6 PASK PKMYT1 UHRF1
Cell_cycle_Liu	9.2607e-08	CCNF CENPE CHAF1B CLSPN ESCO2 GTSE1 H2AFX KIF11 MCM4 MCM6 NCAPD2 NEIL3 PIF1 POLQ RRM2 UBR7 UHRF1
Cell_cycle_Whitfield	1.74554e-10	ASF1B BRCA1 CADM1 CCNF CDCA7 CENPE CHAF1A CHAF1B CLSPN DDX11 DIAPH3 ESCO2 FANCD2 FANCG FANCI GTSE1 H2AFX KIF11 MCM4 MCM5 MCM6 NCAPD2 NCAPD3 NEIL3 PASK PIF1 PKMYT1 RECQL4 RRM2 SPAG5 SPIN4 UBR7 UHRF1
Glutamine_Glucose_starve_both_down	0.00120439	ATP2A3 CADM1 CSNK1G2 DVL1 EIF4G1 FANCG GOT2 H2AFX MUTYH NCAPD2 PDLIM1 PTBP1 SLC29A1 TK1 TUBG1
HIF1alpha_1.5x_down	2.68202e-13	ASF1B BRCA1 CCNF CHAF1A DDX11 ELK1 ELOVL6 FANCG FANCI GINS1 H2AFX LRP8 MCM2 MCM4 MCM5 MCM6 MTHFD1 NCAPD3 PKMYT1 POLA2 RRM2 TUBG1
HIF1alpha_2x_down	9.49802e-13	BRCA1 CCNF CHAF1A DDX11 ELK1 ELOVL6 GINS1 LRP8 MCM2 MCM4 MCM5 RRM2
IRF4_myeloma_induced_Agilent	0.0433667	BMP6 FKBP11 HMBS NR4A1 PELI3 TCOF1 TERT
IRF4_myeloma_induced_Lymphochip	0.0196797	AXIN1 BMP6 CD38 IFI16 IRF4 NR4A1
IRF4_myeloma_induced_all	0.0059823	AXIN1 BMP6 CD38 FKBP11 HMBS IFI16 IRF4 NR4A1 PELI3 TCOF1 TERT
Leucine_starve_down	0.0273049	EIF4G1 MCM4 MTHFD1 POLG PTBP1 SLC29A1 TK1
MCL_proliferation_survival	2.42282e-05	MCM2 NEIL3 PIF1 TK1 UHRF1
Myc_ChIP_PET_Expr_Up	0.00231868	ATP1A1 BICD2 CDCA7 COMTD1 DNMT3B DVL1 FKBP11 GALNT2 MCM4 NOL6 RAD54L TTF2 XPO5 ZNF598
Notch_T-ALL_up_Weng	0.0196856	IFI16 POLD1 PTP4A3 TK1
Proliferation_DLBCL	2.54554e-15	ACTB BRCA1 CENPE CHAF1A CS CSNK1G2 DNMT1 EIF4G1 ELK1 ESCO2 GMPS GOT2 GPI HMBS IKZF1 KIF11 LRRC47 MAT2A MCM2 MCM4 MCM5 MTHFD1 MYBL2 NCAPG2 NEIL3 PIF1 PKMYT1 POLA2 POLQ PRKDC PTBP1 RAD54L RBBP4 RBL1 RRM2 TK1 TMEM194A TUBG1 UHRF1
Proliferation_Node1618	0.000684465	FANCI MCM2 MCM4 MCM5 RRM2 TCF3
Myc_Targets	0.00350228	BCL2L12 BRCA1 BRCA2 CORO1C DDX11 ELK1 FKBP11 GPI GTF3C4 H2AFX HMBS ITGA6 LRP8 MAT2A MCM4 MCM5 MTHFD1 MYBL2 POLH PRKDC RAD54L RBBP4 RBL1 STUB1 TERT TK1 TUBG1 TYK2
BACH2_target_ChIPseq	2.90849e-08	ACTB ADRBK1 ATAD3A ATAD5 ATP2A3 BMP6 BRCA1 CCDC150 CCDC18 CCDC85B CCRN4L CD38 CDCA7 CDCA7L CENPE CENPJ CEP135 CLSPN CPNE2 CYFIP2 DNMT1 EBF1 EFHD2 EHMT2 FANCD2 FANCI FERMT3 GATAD2A GINS1 GOT2 GPI GTPBP1 GTSE1 H2AFX HECW2 HGS HIST1H2AL HIST1H3G HMBS ICAM2 IFI16 IKZF1 IRF4 KCB2 KCTD12 KIF11 KIF15 KNTC1 LRP8 LUC7L MAP7D1 MAPK12 MAT2A MCM2 MCM4 MCM5 MTHFD1 MUTYH CC1 NCAPD2 NEIL3 NUMBL OGG1 PDLIM1 PEX2…
GCB_BCL6SMRT_Distal_Enhancer	0.035062	AP1M1 CDCA7L ETS1 FLT1 IKZF1 ITGA6 LIG1 RTDR1
GC_termDiff_Genes	0.0445356	ADAP1 AGAP3 ARID3A BHLHA15 BHLHE40 BMP6 CORO1C CSMD1 CXXC5 ECI1 ESCO2 FGFRL1 FKBP11 FLT1 GADD45G GALNT2 GMPPB H1FX ICAM2 IGLL1 IRF4 ITGA6 ITPK1 KC7 MTFP1 NT5DC2 POC1A SEC24D
Ly1_siBCL6_48h_upreg	0.00492582	ARID3A BHLHA15 CADM1 CBX2 CCP110 CDCA7 CNKSR2 CORO1C CPNE2 E2F7 EBF1 FANCI FLT1 H1FX H2AFX IRF4 KCTD12 MFGE8 NCAPD3 NEIL3 PACSIN3 PDLIM1 PRKAR2B RAD54L RRM2 SESTD1 SFMBT2 TMSB15B ZNF704
ly1.promoter.BCL6.all.3140	0.0055682	ALG12 ARID3A ATP2A3 BRCA2 BTBD6 CCDC18 CCDC85B CCRN4L CD38 CDCA7 CDCA7L CENPE CEP135 DNMT1 DUSP7 EBF1 ELOVL6 FERMT3 GALNT2 GOT2 H1FX ICAM2 IKZF1 IKZF3 ITPK1 JRK KCTD12 LRRCC1 MAT2A MBD3 MCM4 CC1 PDE12 PIF1 POLG POLH PRDM15 PRKDC RBBP4 RBL1 RCC2 SIPA1 SLC17A9 SMAD6 SMC1A SMG5 SNRNP70 SNX22 SPIN4 STK39 TCF3 TELO2 TTC7A TTF2 XPO5
ly1.promoter.BCL6-BCOR.all.2142	0.00343698	ARID3A ATP2A3 BRCA2 BTBD6 CCDC18 CCDC85B CCRN4L CD38 CDCA7 CDCA7L CEP135 DUSP7 EBF1 ELOVL6 GALNT2 GOT2 H1FX IKZF1 IKZF3 ITPK1 JRK KCTD12 MAT2A CC1 PDE12 PIF1 POLG POLH PRDM15 RBL1 RCC2 SIPA1 SLC17A9 SMAD6 SMC1A SNX22 SPIN4 TCF3 TELO2 TTC7A TTF2 XPO5
ly1.promoter.BCL6-BCOR.only.1783	0.0291091	BRCA2 BTBD6 CCDC85B CCRN4L CD38 CDCA7 CDCA7L CEP135 DUSP7 EBF1 ELOVL6 GALNT2 GOT2 H1FX IKZF1 IKZF3 ITPK1 JRK KCTD12 MAT2A PIF1 POLG POLH RBL1 RCC2 SIPA1 SLC17A9 SMAD6 SMC1A SPIN4 TTC7A TTF2 XPO5
GCB.promoter.BCL6.all.5541	3.2068e-06	ACAD9 ACTB ARID3A ATAD5 ATP1A1 ATP2A3 BICD2 BRCA2 CANT1 CAST CCDC18 CCDC77 CCDC85B CCRN4L CD38 CDCA7 CDCA7L CENPE CENPJ CENPT CEP135 CHAF1A COMTD1 CXXC5 CYFIP2 DNMT1 DUSP7 EBF1 EDC4 EIF4G1 ELOVL6 ESCO2 ETS1 FANCG FANCI GADD45G GINS1 GOT2 GTF3C4 H2AFX HGS ICAM2 IKZF1 IKZF3 ITPK1 JRK KCB2 KCTD12 KIF11 KIF15 KNTC1 LAT2 LIG1 LRP8 LRRC47 LRRCC1 LUC7L MAT2A MCM4 MLST8 MRPS34 MYBL2 CC1 NCAPD2 NCAPD3 OGG…
GCB.promoter.BCL6-BCOR.all.5451	2.87691e-06	ACAD9 ACTB ARID3A ATAD5 ATP1A1 ATP2A3 BICD2 BRCA2 CANT1 CAST CCDC18 CCDC77 CCDC85B CCRN4L CD38 CDCA7 CDCA7L CENPE CENPJ CENPT CEP135 CHAF1A COMTD1 CXXC5 CYFIP2 DNMT1 DUSP7 EBF1 EDC4 EIF4G1 ELOVL6 ESCO2 ETS1 FANCG FANCI GADD45G GINS1 GOT2 GTF3C4 H2AFX HGS ICAM2 IKZF1 IKZF3 ITPK1 JRK KCB2 KCTD12 KIF11 KIF15 KNTC1 LAT2 LIG1 LRP8 LRRC47 LRRCC1 LUC7L MAT2A MCM4 MLST8 MRPS34 MYBL2 CC1 NCAPD2 NCAPD3 OGG…
GCB.promoter.BCL6-BCOR.only.4145	4.85789e-05	ACAD9 ACTB ATAD5 ATP1A1 BICD2 BRCA2 CANT1 CAST CCDC18 CCDC85B CCRN4L CD38 CDCA7 CENPE CENPT COMTD1 CXXC5 CYFIP2 DNMT1 DUSP7 EBF1 EDC4 EIF4G1 ELOVL6 ESCO2 ETS1 FANCG FANCI GADD45G GINS1 GOT2 GTF3C4 H2AFX HGS IKZF1 IKZF3 ITPK1 JRK KCTD12 KIF11 KIF15 KNTC1 LIG1 LRP8 LRRC47 LRRCC1 LUC7L MAT2A MCM4 MLST8 MRPS34 NCAPD2 NCAPD3 OGG1 PEX26 PGM1 POLH POLQ PRKAR1B PRKDC RBL1 RBM38 RCC2 RTDR1 SCMH1 SLC17A9 S…
PU.1_target_ChIPseq_Ebert_Cell_11	0.00536327	ACTB ADAP1 ARID3A ATP1A1 ATP2A3 BICD2 BRCA2 CAST CD38 CENPE CNKSR2 CORO1C CYFIP2 EFHD2 ELOVL6 ETS1 FLT1 GALNT2 GATAD2A GINS1 GO1 GPR124 IKZF1 IKZF3 IRF4 ITGA6 ITPK1 KCB2 KIF15 KNTC1 LAT2 MAP7D1 MAT2A MCM5 MYLK NCAPG2 NT5DC3 OGG1 PASK POLG POLH PRKAR1B RAD54L RBM38 SCMH1 SIPA1 SLC17A9 SLC29A1 STK39 TCOF1 TMEM180 TMEM194A TMEM39B ZNF506
PU.1_NB_prom	0.0159404	ACTB ADRBK1 ANKLE1 ARID3A ASF1B ATP1A1 ATP2A3 BICD2 BRCA2 CCDC18 CEP135 CORO1C CSNK1G2 CXXC5 CYFIP2 FAM58A FANCG FANCI FERMT3 GADD45G GATAD2A HGS HIST1H2AL ICAM2 IKZF3 KCB2 KNTC1 LAT2 LUC7L MCM5 MRPS34 NOL6 NR4A1 PASK PEX26 POLG PRDM15 PRKAR1B RBBP4 RBM38 RTDR1 SCMH1 SEC24D SIPA1 SLC17A9 SMARCC1 SNX22 STK40 THOC6 TIMELESS TTC7A TUBG1 UBR7 UGGT1 ZNF506 ZNF598 ZNF611 ZNF672
PU.1_NB_enhancer	0.00538831	ACTB ADAP1 ADRBK1 AP1M1 ARID3A ATP1A1 ATP2A3 BHLHE40 BICD2 BRCA2 CADM1 CCDC18 CD38 CDCA7L CENPT CNKSR2 CORO1C CPNE2 CSMD1 CXXC5 CYFIP2 DIAPH3 E2F7 EBF1 ETS1 FAM58A FLT1 GALNT2 GATAD2A GINS1 GO1 GPR124 GTPBP1 HAUS5 HECW2 ICAM2 IFI16 IGLL1 IKZF1 IKZF3 IRF4 ITGA6 ITPK1 ITPRIPL1 KCB2 KDM4A KIF15 KNTC1 LAT2 LRP8 MAP7D1 MCM5 MFSD2A MYBL2 NCAPG2 NT5DC3 NUMBL PASK PDLIM1 PELI3 PEX26 POC1A POLD1 POLH PRDM…
PU.1_NB_all	0.000235928	ACTB ADAP1 ADRBK1 ANKLE1 AP1M1 ARID3A ASF1B ATP1A1 ATP2A3 BHLHE40 BICD2 BRCA2 CADM1 CCDC18 CD38 CDCA7L CENPE CENPT CEP135 CLSPN CNKSR2 CORO1C CPNE2 CSMD1 CSNK1G2 CXXC5 CYFIP2 DIAPH3 E2F7 EBF1 ELFN2 ETS1 FAM58A FANCG FANCI FERMT3 FLT1 GADD45G GALNT2 GATAD2A GINS1 GINS4 GO1 GPR124 GTF3C4 GTPBP1 HAUS5 HECW2 HGS HIST1H2AL ICAM2 IFI16 IGLL1 IKZF1 IKZF3 IRF4 ITGA6 ITPK1 ITPRIPL1 KCB2 KCTD12 KDM4A KIF15…
PU.1_CB_enhancer	0.00231868	ACTB ADAP1 AP1M1 ARID3A ATP1A1 ATP2A3 BHLHE40 BICD2 BRCA2 CADM1 CCDC61 CD38 CDCA7 CDCA7L CEP135 CNKSR2 CORO1C CXXC5 CYFIP2 DIAPH3 E2F7 EBF1 EFHD2 ELFN2 ETS1 FAM58A FLT1 GADD45G GALNT2 GATAD2A GINS1 GO1 HAUS5 HECW2 IFI16 IGLL1 IKZF1 IKZF3 IRF4 ITGA6 ITPK1 ITPRIPL1 KCB2 KDM4A KIF15 KNTC1 LAT2 LRP8 MAP7D1 MCM5 MFGE8 MFSD2A MTHFD1 MYBL2 NCAPG2 NUMBL PASK PEX26 PIF1 POLD1 POLH PRDM15 PRKAR1B PRKAR2B P…
PU.1_CB_all	0.00137475	ACTB ADAP1 ANKLE1 AP1M1 ARID3A ASF1B ATP1A1 ATP2A3 BHLHE40 BICD2 BRCA2 CADM1 CCDC61 CCNF CD38 CDCA7 CDCA7L CEP135 CLSPN CNKSR2 CORO1C CSNK1G2 CXXC5 CYFIP2 DIAPH3 E2F7 EBF1 EFHD2 ELFN2 ETS1 FAM58A FANCG FANCI FLT1 GADD45G GALNT2 GATAD2A GINS1 GMPPB GO1 HAUS5 HECW2 IFI16 IGLL1 IKZF1 IKZF3 IRF4 ITGA6 ITPK1 ITPRIPL1 KCB2 KCTD12 KDM4A KIF15 KNTC1 LAT2 LRP8 LUC7L MAP7D1 MAT2A MCM5 MFGE8 MFSD2A MRPS34 M…
CTCF_NB_enhancer	0.000652225	ACTB ADAP1 ADRBK1 AGAP3 AP1M1 BAHCC1 BCL2L12 BHLHE40 BICD2 BMP6 BRCA2 CADM1 CAST CBX2 CCDC18 CCDC61 CCRN4L CD38 CDCA7 CENPT CHAF1B CLSPN CNKSR2 CORO1C CS CSMD1 CXXC5 CYFIP2 DDX11 DHRS2 DNMT3B E2F7 EBF1 EDC4 ELOVL6 ETS1 FAM58A FKBP11 FLT1 GADD45G GALNT2 GATAD2A GINS1 GIT1 GO1 GOT2 GTPBP1 GTSE1 HAUS5 HEATR4 HECW2 ICAM2 IFI16 IGLL1 IKZF1 ITGA6 ITPK1 JRK KC7 KCB2 KCTD12 LAT2 LIG1 LMF2 LRP8 MAP7D1 MCM…
CTCF_NB_all	1.34065e-06	ACTB ADAP1 ADRBK1 AGAP3 ANKLE1 AP1M1 ASF1B ATP2A3 BAHCC1 BCL2L12 BHLHE40 BICD2 BMP6 BRCA2 CADM1 CANT1 CAST CBX2 CCDC18 CCDC61 CCDC77 CCDC85B CCRN4L CD38 CDCA7 CENPT CEP135 CHAF1A CHAF1B CLSPN CNKSR2 COMTD1 CORO1C CS CSMD1 CXXC5 CYFIP2 DDX11 DHRS2 DNMT3B DVL1 E2F7 EBF1 EDC4 EFHD2 ELFN2 ELOVL6 ETS1 FAM58A FERMT3 FKBP11 FLT1 GADD45G GALNT2 GATAD2A GINS1 GINS4 GIT1 GO1 GOT2 GTPBP1 GTSE1 H2AFX HAUS5 H…
CTCF_CB_enhancer	0.00810731	ACAD9 ACTB ADAP1 ADRBK1 AGAP3 AP1M1 ARID3A BAHCC1 BCL2L12 BHLHE40 BICD2 BMP6 CADM1 CAST CBX2 CCDC18 CCDC61 CCRN4L CD38 CDCA7 CENPT CEP135 CHAF1B CLSPN CNKSR2 CORO1C CS CSMD1 CSNK1G2 CXXC5 CYFIP2 DDX11 DHRS2 DIAPH3 DNMT3B E2F7 EBF1 EDC4 ELK1 ELOVL6 ETS1 FAM58A FKBP11 FLT1 GADD45G GALNT2 GATAD2A GINS4 GIT1 GO1 GOT2 GTPBP1 GTSE1 HAUS5 HEATR4 HECW2 ICAM2 IFI16 IGLL1 IKZF1 ITGA6 ITPK1 KCB2 KCTD12 LAT2…
CTCF_CB_all	0.000384944	ACAD9 ACTB ADAP1 ADRBK1 AGAP3 ANKLE1 AP1M1 ARID3A ASF1B ATP2A3 BAHCC1 BCL2L12 BHLHE40 BICD2 BMP6 CADM1 CANT1 CAST CBX2 CCDC18 CCDC61 CCDC77 CCDC85B CCRN4L CD38 CDCA7 CENPT CEP135 CHAF1A CHAF1B CLSPN CNKSR2 COMTD1 CORO1C CS CSMD1 CSNK1G2 CXXC5 CYFIP2 DDX11 DHRS2 DIAPH3 DNMT3B DVL1 E2F7 EBF1 EDC4 EFHD2 ELFN2 ELK1 ELOVL6 ETS1 FAM58A FERMT3 FKBP11 FLT1 GADD45G GALNT2 GATAD2A GINS4 GIT1 GO1 GOT2 GTPBP…
CTCF_ly1_prom	0.00822278	ACTB ADRBK1 AGAP3 ANKLE1 ARHGDIA ASF1B ATP2A3 AXIN1 BHLHE40 BICD2 CBX2 CCDC77 CCDC85B CCNF CDCA7L CEP135 CHAF1A CNKSR2 COMTD1 CORO1C CPNE2 CXXC5 CYFIP2 DNMT3B DUSP7 DVL1 ELFN2 FANCI FERMT3 FHOD1 FKBP11 GADD45G GALNT2 GATAD2A GINS4 GMPS GOT2 GTSE1 H1FX H2AFX IKZF3 ITGA6 ITPK1 JRK KC7 KCTD12 LRP8 MAT2A MBD3 MRPS34 MUTYH NCAPD2 NUMBL PASK PDLIM1 PEX26 PGM1 POLQ PVRIG RAD54L RBM38 RHOT2 RLTPR RRM2 RU…
CTCF_ly1_enhancer	2.48697e-05	ACAD9 ACTB ADAP1 ADRBK1 AGAP3 ANKLE1 AP1M1 ARHGDIA ARID3A ATP1A1 ATP2A3 AXIN1 BAHCC1 BCL2L12 BHLHE40 BICD2 BMP6 BRCA2 CADM1 CANT1 CAST CBX2 CCDC150 CCDC18 CCDC61 CCDC77 CCNF CCRN4L CD38 CDCA7 CDCA7L CENPE CENPT CEP135 CHAF1B CHR5 CLSPN CNKSR2 COMTD1 CORO1C CPNE2 CS CSMD1 CSNK1G2 CXXC5 CYFIP2 DDX11 DHRS2 DIAPH3 DNMT1 DNMT3B DUSP7 E2F7 EBF1 EDC4 ELFN2 ELK1 ELOVL6 ETS1 FAM58A FANCI FERMT3 FGFRL1 FHO…
CTCF_ly1_all	1.02578e-06	ACAD9 ACTB ADAP1 ADRBK1 AGAP3 ANKLE1 AP1M1 ARHGDIA ARID3A ASF1B ATP1A1 ATP2A3 AXIN1 BAHCC1 BCL2L12 BHLHE40 BICD2 BMP6 BRCA2 CADM1 CANT1 CAST CBX2 CCDC150 CCDC18 CCDC61 CCDC77 CCDC85B CCNF CCRN4L CD38 CDCA7 CDCA7L CENPE CENPT CEP135 CHAF1A CHAF1B CHR5 CLSPN CNKSR2 COMTD1 CORO1C CPNE2 CS CSMD1 CSNK1G2 CXXC5 CYFIP2 DDX11 DHRS2 DIAPH3 DNMT1 DNMT3B DUSP7 DVL1 E2F7 EBF1 EDC4 EFHD2 EIF4G1 ELFN2 ELK1 ELO…
P300_ly1_prom	0.000214926	ACTB ATP2A3 BCL2L12 CCDC77 CCRN4L CDCA7L CENPE DNMT1 EDC4 ELK1 FANCG FANCI H1FX JRK KCB2 KCTD12 KIF24 MAP7D1 MAT2A MCM4 MLST8 PIF1 POLG PRDM15 PRKDC RHOT2 RTDR1 SMC1A SNX22 TCF3 TTLL12
P300_ly1_enhancer	0.00810731	ADRBK1 AP1M1 ATP2A3 BICD2 CSMD1 CXXC5 CYFIP2 EBF1 ELK1 ETS1 GALNT2 GATAD2A HECW2 IKZF3 MTHFD1 MYBL2 POLD1 PRDM15 RBM38 RTDR1 SMC1A SNX22 TCF3 TERT TTC7A
P300_ly1_all	0.000235928	ACTB ADAP1 ADRBK1 ANKLE1 AP1M1 ARID3A ASF1B ATP1A1 ATP2A3 BHLHE40 BICD2 BRCA2 CADM1 CCDC18 CD38 CDCA7L CENPE CENPT CEP135 CLSPN CNKSR2 CORO1C CPNE2 CSMD1 CSNK1G2 CXXC5 CYFIP2 DIAPH3 E2F7 EBF1 ELFN2 ETS1 FAM58A FANCG FANCI FERMT3 FLT1 GADD45G GALNT2 GATAD2A GINS1 GINS4 GO1 GPR124 GTF3C4 GTPBP1 HAUS5 HECW2 HGS HIST1H2AL ICAM2 IFI16 IGLL1 IKZF1 IKZF3 IRF4 ITGA6 ITPK1 ITPRIPL1 KCB2 KCTD12 KDM4A KIF15…
EP300_mut_down_271_Ash_FL	0.000796318	FANCI GMPS GPI MCM2 MCM4 MCM6 NCAPD2 PASK PGM1 SMARCC1 TCF3 UHRF1
CREBBP.mouse.ChIPseq.LOSS.25.prom	0.00102862	ACTB ATAD3A ATAD5 BHLHE40 BICD2 CHTF18 CS EIF4G1 ELK1 GADD45G HAUS5 LRRCC1 MAT2A MEX3D NCAPG2 NOL6 PASK PGM1 POLD1 PRDM15 RSEH2A RUSC1 SPNS3 STUB1 UBR7 XRCC3
CREBBP.mouse.ChIPseq.LOSS.25.enhancer	0.00535287	BHLHE40 CS EBF1 EIF4G1 GADD45G GATAD2A HAUS5 IKZF1 ITPK1 LRRCC1 MAT2A NOL6 OGG1 PGM1 POLD1 RSEH2A SPNS3 STUB1 UBR7 XRCC3
Intron_loss.ATAC.reads_CREBBP.KD	5.56727e-06	ATP2A3 BICD2 CD38 CXXC5 ELFN2 GALNT2 HECW2 IRF4 KIF24 LAT2 MYBL2 MYLK PDLIM1 PGM1 RBM38 SIPA1
Enhancer_loss.ATAC.reads_CREBBP.KD	0.000974028	ATP1A1 ATP2A3 BICD2 CD38 CORO1C CPNE2 CXXC5 ELFN2 GADD45G GALNT2 GINS1 HECW2 IRF4 KIF24 LAT2 LIG1 MYBL2 MYLK PDLIM1 PEX26 PGM1 RBM38 SESTD1 SIPA1 TERT
c1.Ep300.up_381	0.00956393	AP1M1 AXIN1 CAST E4F1 FAM58A HAUS5 MRPS34 PIF1 RHOT2 SSBP4 STUB1 TELO2
c1.Ep300.down_692	0.00909227	ARID3A BHLHE40 BRCA2 ESCO2 GADD45G IKZF3 IRF4 KCB2 KCTD12 MCM4 MCM5 NEIL3 NR4A1 ORC1 POLQ RAD54L SLC29A1 TTF2
MD901.loss.25.prom.g	8.7141e-51	ACAD9 ACTB ANKLE1 AP1M1 ARHGDIA ARID3A ASF1B ATAD5 ATP2A3 BRCA1 BRCA2 CCDC150 CCDC18 CCDC77 CCDC85B CDCA7L CENPE CENPJ CENPT CHAF1A CLSPN COMTD1 CORO1C CS CXXC5 CYFIP2 DDX11 DNMT1 DUSP7 E2F7 E4F1 EBF1 EHMT2 ELK1 ELOVL6 ESCO2 ETS1 FANCD2 FANCG FANCI FKBP11 GALNT2 GINS1 GIT1 GMPPB GOT2 GTF3C4 GTPBP1 GTSE1 H2AFX HAUS5 HGS HIST1H2AL HIST1H3G IFI16 IGLL1 IRF4 ITPRIPL1 JRK KIF11 KNTC1 LAT2 LIG1 LMF2 LR…
MD901.loss.25.enhancer.g	1.1476e-41	ACAD9 ADAM32 ADAP1 ADRBK1 ANKLE1 AP1M1 ARHGDIA ARID3A ATP2A3 BAHCC1 BHLHE40 BRCA1 CADM1 CCDC150 CCDC18 CCDC77 CD38 CDCA7L CENPE CENPJ CENPT CHAF1A COMTD1 CORO1C CPNE2 CS CSMD1 CXXC5 CYFIP2 DDX11 DNMT1 DNMT3B DUSP7 E2F7 E4F1 EBF1 ELFN2 ELK1 ELOVL6 ESCO2 ETS1 FANCD2 FANCI FHOD1 FKBP11 FLT1 GADD45G GALNT2 GIT1 GOT2 GPR124 GTF3C4 GTPBP1 GTSE1 HAUS5 HECW2 HGS IKZF1 IKZF3 IRF4 ITPK1 ITPRIPL1 JRK KNTC1 …
MD901.loss.5.prom.g	1.80765e-29	ANKLE1 ARID3A ATAD5 ATP2A3 CCDC18 CCDC85B CENPE CENPJ CHAF1A CLSPN COMTD1 CORO1C CXXC5 E4F1 ESCO2 FANCG FKBP11 GMPPB GTPBP1 GTSE1 H2AFX HIST1H3G IRF4 ITPRIPL1 KIF11 LIG1 LRP8 MCM2 MCM5 MCM6 MFSD2A MRPS34 MYLK NCAPG2 NR4A1 NT5DC2 PDLIM1 PELI3 PGM1 PIF1 PKMYT1 POC1A POLD1 POLG PRDM15 PRKAR1B PTBP1 PVRIG RBBP4 RBL1 RBM38 RLTPR RRM2 RRP7B SIPA1 SLC17A9 SMC1A SPNS3 TCF3 TCOF1 TELO2 TERT THOC6 TK1 TMEM…
MD901.loss.5.enhancer.g	6.9148e-27	ACAD9 ADAM32 ADAP1 ANKLE1 ARID3A ATP2A3 BAHCC1 CADM1 CCDC18 CENPE CENPJ CENPT CHAF1A COMTD1 CORO1C CPNE2 CXXC5 E4F1 ELFN2 ELOVL6 ESCO2 ETS1 FKBP11 FLT1 GADD45G GALNT2 GPR124 GTPBP1 GTSE1 HECW2 IKZF1 IKZF3 IRF4 ITPK1 LAT2 LIG1 LRP8 MCM2 MCM6 MFSD2A MYLK NCAPG2 NT5DC2 PDLIM1 PELI3 PIF1 POC1A POLD1 PTP4A3 PVRIG RBBP4 RLTPR RRM2 RRP7B RTDR1 SIPA1 SLC17A9 SMAD6 SMC1A SPNS3 STK40 TCOF1 TELO2 TK1 TMEM19…
crebbp.ly7.enhancer	7.05823e-09	ACTB ADAM32 ADAP1 ADRBK1 AP1M1 ARHGDIA ASF1B ATP1A1 ATP2A3 BAHCC1 BHLHE40 BICD2 BRCA2 BUB1B BZRAP1 CADM1 CCDC18 CCDC61 CCNF CD38 CDCA7 CDCA7L CLSPN CORO1C CPNE2 CS CXXC5 CYFIP2 DDX11 DIAPH3 DNMT1 E2F1 EBF1 ELFN2 ELOVL6 ETS1 FANCD2 FHOD1 FLT1 FRMD5 GADD45G GALNT2 GATAD2A GINS1 GNAO1 GOT2 H1FX HAUS5 HECW2 HM13 ICAM2 IFI16 IKZF1 IKZF3 IL4I1 IRF4 ITPK1 ITPRIPL1 KIF11 KIF24 KNTC1 LAT2 LIG1 LRP8 MAP7D1…
crebbp.ly7.prom	1.05033e-11	ACTB ADRBK1 ATAD3A ATP1A1 ATP6V1G2 BCL2L12 BRCA1 BRCA2 BUB1B BZRAP1 CAST CCDC18 CCDC61 CCDC77 CD38 CDCA7 CDCA7L CENPJ CEP135 CHAF1A CS CYFIP2 DDX11 E2F1 EBF1 EHMT2 ELOVL6 ESCO2 ETS1 FANCD2 FBXW9 FERMT3 GNL3L GTPBP1 H2AFX HIST1H2AB HIST1H2AL HIST1H3G ICAM2 IFI16 IKZF1 IKZF3 IL4I1 IRF4 KIF11 KIF24 KNTC1 LAT2 LIG1 LRRC47 MAT2A MCM2 MDC1 MTHFD1 MYBL2 NACC1 NCAPD2 NCAPD3 NEIL3 NOL6 PDE12 PELI3 PEX26 P…
HSA04612_ANTIGEN_PROCESSING_AND_PRESENTATION	0	HLA-F NFYC KLRD1 NFYB CREB1 HLA-DQA1 IFI30 HLA-DMB HSP90AA1 CALR HLA-DOA HSPA5 CD74 HLA-DQA2 CIITA HLA-DPA1 HLA-DMA HLA-DPB1 HLA-DRA
HSA03030_DNA_POLYMERASE	0.00573456	POLA2 POLD1 POLG POLH POLQ
HSA04110_CELL_CYCLE	0.00573456	GADD45G MCM2 MCM4 MCM5 MCM6 PKMYT1 PRKDC RBL1 SMC1A
BIOPOLYMER_METABOLIC_PROCESS	1.47625e-05	ALG12 BMP6 BRCA1 BRCA2 CCRN4L CSNK1G2 DNMT1 DNMT3B ELK1 FANCG GADD45G GALNT2 GATAD2A GTF3C4 HGS IKZF3 LIG1 MAPK12 MCM2 MCM5 MUTYH MYLK OGG1 PIF1 POLD1 POLG POLH POLQ POU4F1 PRKDC PTBP1 RAD54L RECQL4 RSEH2A SARS2 SMARCC1 SMC1A SMG5 STUB1 TCF3 TERT TTF2 TYK2 UHRF1 XRCC3 ZNF282 ZNF346
CELL_CYCLE_GO_0007049	0.000488993	BRCA2 CENPE DDX11 DHRS2 FANCG KIF11 KIF15 KNTC1 MAPK12 MCM2 PKMYT1 POLD1 RAD54L SMC1A TIMELESS TUBG1
CELL_CYCLE_PHASE	0.00782228	CENPE DDX11 KIF11 KIF15 KNTC1 PKMYT1 POLD1 RAD54L SMC1A TIMELESS
CELL_CYCLE_PROCESS	0.00105912	BRCA2 CENPE DDX11 KIF11 KIF15 KNTC1 PKMYT1 POLD1 RAD54L SMC1A TIMELESS TUBG1
CHROMOSOME_ORGANIZATION_AND_BIOGENESIS	0.004029	CENPE CHAF1A CHAF1B DDX11 PIF1 RBBP4 SMARCC1 SMC1A TERT
CHROMOSOME_SEGREGATION	0.0465192	BRCA1 CENPE DDX11 SMC1A
DNA_METABOLIC_PROCESS	2.10748e-10	BRCA1 BRCA2 DNMT1 DNMT3B FANCG GADD45G GATAD2A LIG1 MCM2 MCM5 MUTYH OGG1 PIF1 POLD1 POLG POLH POLQ RAD54L RECQL4 RSEH2A SMC1A TERT XRCC3
DNA_MODIFICATION	0.0312006	DNMT1 DNMT3B GATAD2A
DNA_REPAIR	2.68147e-08	BRCA1 BRCA2 FANCG GADD45G LIG1 MUTYH OGG1 POLD1 POLG POLH POLQ RAD54L RECQL4 SMC1A XRCC3
M_PHASE	0.00902721	CENPE DDX11 KIF11 KIF15 KNTC1 PKMYT1 RAD54L SMC1A
M_PHASE_OF_MITOTIC_CELL_CYCLE	0.00902721	CENPE DDX11 KIF11 KIF15 KNTC1 PKMYT1 SMC1A
MITOSIS	0.00899269	CENPE DDX11 KIF11 KIF15 KNTC1 PKMYT1 SMC1A
MITOTIC_CELL_CYCLE	0.0465192	CENPE DDX11 KIF11 KIF15 KNTC1 PKMYT1 POLD1 SMC1A
NUCLEOBASE__NUCLEOSIDE__NUCLEOTIDE_AND_NUCLEIC_ACID_METABOLIC_PROCESS	3.00441e-08	BMP6 BRCA1 BRCA2 CCRN4L DNMT1 DNMT3B ELK1 FANCG GADD45G GATAD2A GMPS GTF3C4 IKZF3 IRF4 LIG1 MCM2 MCM5 MUTYH OGG1 PIF1 POLD1 POLG POLH POLQ POU4F1 PTBP1 RAD54L RECQL4 RSEH2A SARS2 SCMH1 SLC29A1 SMARCC1 SMC1A SMG5 TCF3 TERT TIMELESS TK1 TTF2 UHRF1 XRCC3 ZNF282 ZNF346
REGULATION_OF_LIPID_METABOLIC_PROCESS	0.0370113	BMP6 BRCA1 STUB1
RESPONSE_TO_DNA_DAMAGE_STIMULUS	1.68181e-08	BRCA1 BRCA2 FANCG GADD45G IFI16 LIG1 MAPK12 MUTYH OGG1 POLD1 POLG POLH POLQ RAD54L RECQL4 SMC1A XRCC3
RESPONSE_TO_ENDOGENOUS_STIMULUS	1.81937e-07	BRCA1 BRCA2 FANCG GADD45G IFI16 LIG1 MAPK12 MUTYH OGG1 POLD1 POLG POLH POLQ RAD54L RECQL4 SMC1A XRCC3
RESPONSE_TO_STRESS	0.00899269	BRCA1 BRCA2 FANCG GADD45G IFI16 LIG1 MAPK12 MUTYH OGG1 PDLIM1 POLD1 POLG POLH POLQ RAD54L RECQL4 SMC1A XRCC3
S_PHASE	0.0474654	DDX11 POLD1 TIMELESS
SPINDLE_ORGANIZATION_AND_BIOGENESIS	0.0312006	KIF11 SMC1A TUBG1
ATRBRCAPATHWAY	0.0213646	BRCA1 BRCA2 FANCD2 FANCG
DNA_POLYMERASE	0.0231045	POLD1 POLG POLQ
DNA_REPLICATION_REACTOME	0.00535268	MCM2 MCM4 MCM5 MCM6 POLA2 POLD1
G1_TO_S_CELL_CYCLE_REACTOME	0.0213646	MCM2 MCM4 MCM5 MCM6 POLA2 RBL1
HSA03030_DNA_POLYMERASE	0.0045033	POLA2 POLD1 POLG POLH POLQ
HSA04110_CELL_CYCLE	0.0045033	GADD45G MCM2 MCM4 MCM5 MCM6 PKMYT1 PRKDC RBL1 SMC1A
PYRIMIDINE_METABOLISM	0.0151759	CANT1 POLD1 POLG POLQ RRM2 TK1

## Sheet: Tab5
Tab 5: Enriched pathways in top upregulated and downregulated genes in Cohort 1 CREBBP mutant FLs compared to CREBBP WT FLs.
Pathway name	BH corrected p value of c1.Crebbp.up.gene	BH corrected p value of c1.Crebbp.down.gene	Overlapping genes in c1.Crebbp.up.gene	Overlapping genes in c1.Crebbp.down.gene
ABC_gt_GCB_LC		0.00650209	PIM1	CCDC50 ENTPD1 SH3BP5
BCL6_repressed		0.00140435		CD44 CD69 GPR183 IFITM1
B_cell_down_anergy	0.0301901		FES VIM	ACP5
B_cell_up_anergy		5.62672e-05		CD72 EGR1 EGR2 LCK B2
Blood_CD4+Tcell_gt_thymic_SP_CD4+Tcell		0.00950867		CD48 NR3C2 RASA3 SERPINB6 SH3BP5
CD40_downregulated_Burkitt_lymphoma		0.0211506	BMP7 IRS1	CD27 GCNT1 HDAC9 ITGB7 PTPN22
CD40_upregulated_Burkitt_lymphoma		8.07554e-06		ADAM8 CCR7 CD44 DUSP2 GPR183 LGALS1 NCF2 PLXNC1 PTP4A3 SRGN TNFSF9
CD8_T_effectorDn_memoryDn_iveUp		0.00650209	USP44	FCHO1 KCTD12 PTPN6
CD8_T_effectorDn_memoryIm_iveUp		0.000887177		CCR7 CTSC JAM3 SELL SOCS3
CD8_T_effectorUp_memoryUp_iveDn		0.0425105		ITGB1 KLRB1 PTPN7
Dendritic_cell_BDCA1pos_blood		0.0281687		CD1A DHRS9 IL13RA1
Dendritic_cell_CD123pos_blood		1.7495e-10	TBC1D4	APP CCDC50 CLEC4C CLIC3 CXCR3 CXXC5 CYSLTR1 GPR114 GRAMD1B GZMB HHAT IL18R1 ITM2C KIAA1274 LILRA4 LOC285972 PACSIN1 PLD4 PMEPA1 PRKCH PTCRA PTGDS PTPRS RUNX2 SERPINI1 SNX9 TLR9
Dendritic_cell_CD123pos_tonsil		0.00561006		ITM2C PTCRA PTGDS VASH2
Dendritic_cell_CD16pos_blood		0.0158184	SMAD1	CLCF1 HMOX1 SLA UBASH3B
Follicular_lymphoma_Immune_Response1		3.08119e-05	TBC1D4	BIN2 CAMK1D HCST JAM3 PMEPA1 SKI TNFRSF1B
GCB_gt_ABC_Affy		0.0030437		LMO2 SPINK2 VCL
GC_B_cell_BL_equal_DLBCL		6.74052e-05	IGF2BP3 ITPRIPL2 LOC150568 PITPNC1 SLC30A4 SPRED2	BFSP2 CAMK2B CD27 DOK7 FCRLB FOLR2 GPR114 KLHL29 P2RY12 PACSIN1 PCDHGC3 PTPRS SEMA4A SPINK2 ZNF718
GC_B_cell_BLlow_DLBCLhigh		0.000108377	SOCS1	DHRS9 GDPD5 HOPX LMO2 LOXL2 SMPDL3A TEX9
GC_B_cell_U133Plus	0.0109544	7.66624e-10	ANK1 BMP7 IGF2BP3 ITPRIPL2 LOC150568 NKX6-3 PITPNC1 SLC30A4 SOCS1 SPRED2	ACY3 BFSP2 CAMK2B CD27 DHRS9 DOK3 DOK7 FCRLB FOLR2 GDPD5 GPR114 HOPX KLHL29 LHFP LMO2 LOXL2 MED12L P2RY12 PACSIN1 PCDHGC3 PTPRS SEMA4A SMPDL3A SPINK2 TEX9 ZNF718
GC_T_helper_up2x_Chtanova		5.04752e-08	EVC2 PITPNC1 SGCE SMAD1 TBC1D4 TP53INP1	ABCG1 BCL9L CA8 CD27 CD69 CXXC5 EPHB6 FAM167A FYN HIVEP2 HSPA1B ITGB2 KIAA0182 LAX1 LHFP LTBP3 NOTCH1 OBFC2A PDCD1 PTPRN2 RAB15 RASGEF1B SLC9A9 SMPDL3A TMEM55A UST ZFPM1
GC_T_helper_up4x_Chtanova		1.31837e-05	PITPNC1 SGCE SMAD1 TBC1D4	BCL9L CA8 CD27 CXXC5 HSPA1B ITGB2 KIAA0182 LTBP3 OBFC2A PDCD1 PTPRN2 RASGEF1B SLC9A9 UST
HIF1alpha.5x_Up		0.00709345	APOD BNIP3 GRAMD1C	ATXN1 BACE2 HES1 HIVEP2 KLF11 LOXL2 PTGS1 RSE4 SYNPO
HRAS_overexpression_2x_up		0.0363616	PIM1 SOCS1 TFPI2	ADAM8 CLCF1 DUSP4 EGR1 IER2 LRRC8C NT5E S100A6
HRAS_overexpression_4x_up		0.00510815	PIM1 SOCS1 TFPI2	ADAM8 CLCF1 DUSP4 EGR1 IER2 NT5E S100A6
Hematopoietic_Node1658		1.14889e-05		BIN2 CD48 CECR1 FGR LAIR1 LCP2 PLAC8 PTPN6 SELL SELPLG
IL10_OCILy3_Up		2.28306e-07	CEBPD	ACPP BCAR3 BCL9L DHRS9 DMD GPR183 HES1 HMOX1 IFITM1 IFITM2 IL2RB MNDA SNX9 SOCS3
IL6_Ly10_Up_all		0.00233003	SOCS1	DUSP2 EGR2 GPR183 IL2RB SOCS3
IL6_Ly10_Up_group3		0.0125427		GPR183 SOCS3
IRF4_myeloma_induced_Lymphochip		0.00487753	FADS1	FYN ITGB7 JUP NFIL3 NR4A1 PTPN22 PTPN6 ST3GAL1
IRF4_myeloma_induced_all		0.00769907	FADS1	CD97 FYN HIVEP2 ITGB7 JUP KLK1 NFIL3 NR4A1 PTPN22 PTPN6 SLC38A2 SNX9 ST3GAL1
JAK_IL10_Ly10_Up		0.000275415		DHRS9 GPR183 HES1 IFITM2 IL2RB MNDA
KLF2_induced		0.00754679	HLA-G	CXCR3 DOK2 LGALS1 LY6E S100A4 SH3BP5 SLC12A7
KLF2_repressed		0.00865352	SPRED2	ABCG1 CD1A CD1C EGR1 IQGAP2 KIAA0182 PLAC8
Lymph_node_DLBCL		9.7228e-08	CEBPB HLA-G MT2A	ACP5 CD4 CD68 CD97 CST3 DPYD FCER1G GZMB IFITM1 IL13RA1 IL2RB ITGB2 KCTD12 LAIR1 LCP2 TYROBP
MCL_gt_SLL_DLBCL		0.0281687	GNG11	CCDC50 CEACAM1 EPHB6
MHC_classI_Node591	0.042185		HLA-G HLA-H
Metallothionein_Node595	0.035041		MT1X MT2A
Myc_ChIP_PET_2plus		0.0185665	ARHGAP10 BMP7 BNIP3 CBR1 CEBPB CLEC4G CPNE2 CSDA CYB5A CYTH3 DAB2IP EVC2 FADS2 FAIM HRK IL4R KCNIP2 LGR4 LOC150568 LOC284801 LTBP1 MAP1LC3A PDE6B PIM1 SLMO1 SMAD1 SOCS1 SPRED2 TBC1D4 TMCC2 TMEM22 TNS3 TRIP6 TSHZ2 VIM WNK2 ZNF595	AMOT ANGPTL6 ANXA4 APP ARID3A ATP2B4 BRI3BP CA11 CAMK1D CD1A CD44 CD97 CLMN CTSC DMD DNMBP EGR4 ENTPD1 EVI2A FAR2 FGR FYN HCST HHAT HPCAL1 IER2 IFITM2 INF2 INPP5A ITGB1 KIAA1274 KLF11 KLHL29 LILRB4 LRRC33 LRRC56 MACF1 MAPK10 MYO15B MYOM2 NFKBID NME4 NOTCH1 NR4A1 NR4A3 NTF3 PLD4 PMEPA1 PREX1 PRKCH PTCRA PTPRN2 RASGEF1B RASSF3 RGS18 RILPL2 RUNX2 S100A4 SESTD1 SH3BP2 SKI SLA SLC12A7 SLC38A2 SNX9 SOC…
Myc_ChIP_PET_Expr_Down		4.72831e-08	IL4R SOCS1 SPRED2	ATP2B4 CAMK1D CD44 CD97 ENTPD1 EVI2A HCST IER2 IFITM2 LILRB4 NFKBID NR4A1 PLD4 PMEPA1 PREX1 SESTD1 SLA SNX9 SOCS3 SRGN TLR4
Myeloid_Node1536		9.40792e-05		ITGB2 MNDA NCF2 RSE6 TYROBP
Myeloma_CD-1_subgroup_down		0.00415051	ECHDC2 TNS3	CPEB4 CXXC5 DOK3 HES1 LAX1
Myeloma_CD-2_subgroup_up		0.00415051	ZNF608	CD27 FCRLB METRNL PTPRJ SRC
Myeloma_MF_subgroup_down		0.0228137		ALDH2 CAMK1D LOC283070 PTCH1
Myeloma_MF_subgroup_up		0.00511489	CEBPD	ITGB7 LCP2 RASSF4 RSE6 TLR4
Myeloma_PR_subgroup_down		0.024158	SOCS1	ARHGAP18 DPYD NR3C2 PCDHGC3
NFkB_all_OCILy3_Ly10		0.00412891	LOC283663 PIM1	CCR7 CD44 DUSP2 GPR183 NCF2 SELL
NFkB_bothOCILy3andLy10		0.0134943	LOC283663 PIM1	CCR7 CD44 DUSP2 NCF2
Notch_T-ALL_down_Weng		0.0119425		DOK2 DUSP2 KCTD12
Notch_T-ALL_up_Sharma		0.0109178		EGR1 HES1 NOTCH1 PTCRA
Notch_T-ALL_up_Weng		0.00676664	CSDA	HES1 NOTCH1 PTCRA PTP4A3 PTPN22
Notch_T-ALL_up_concensus		0.00555332		HES1 NOTCH1 PTCRA
PAX5_repressed		0.00430169	H1F0 PRSS16	FCER1G IFITM1 LCK LMO2 NOTCH1 RNF130
Pan_B_U133plus		0.0413946		CD1C CD72 KIAA0125 TEX9 UGT8
Quiescence_heme_all		1.92929e-06	HLA-G	ADAM8 ADD3 AHK BIN2 CAMK1D CD44 CD97 DOK2 KLF9 LAIR1 PREX1 PTPN6 SELL SELPLG SH3BP2 SH3BP5 SLA TMEM71 TPK1
Quiescence_heme_cluster1		1.10603e-08	HLA-G	ADAM8 ADD3 AHK BIN2 CD44 CD97 DOK2 LAIR1 PREX1 PTPN6 SELL SELPLG SH3BP2 SH3BP5 SLA TMEM71 TPK1
Regulatory_T_cell_McHugh_Herman_concensus		0.00116972		GZMB LGALS1 LY6E S100A6
Resting_blood_NK_cell_GNF		0.00116972	FSD1	CD300A GNGT2 HOPX IL2RB KLRF1 MYOM2 TBX21
Resting_dendritic_cell_GNF		0.000161003		APP CCDC50 ITM2C KIAA1274 LILRA4 PACSIN1 PTCRA PTGDS PTPRS
Resting_monocyte_GNF		0.0123551	CEBPB CEBPD FXYD6	CLU DPYD MNDA NCF2 PLXNC1 RAB31 RENBP TLR4 TTYH3
STAT3_up_OCILy10		0.00318909		DHRS9 GPR183 IL2RB MNDA SNX9
STAT3high_ABC_DLBCL_subgroup		0.00440543	SOCS1	CD44 DHRS9 GPR183 ITGB1 LMO2 MNDA SOCS3
Serum_response_Fb_up	0.0301901		ACCS APOD ECHDC2 FADS1 FADS2 GABARAPL1 TP53INP1	ADD3 APP ARSD CST3
Splenic_Margil_zone_Bcell_gt_ive_and_GC_Bcell	0.0228914	0.0189934	HIST1H2AC HIST1H2BK TNS3	CCDC50 CD1C FCRL3
Splenic_margil_zone_Bcell_gt_GC_Bcell		0.00593499	HIST1H2AC	CCDC50 CD1C CD44 MPEG1 SLA
Tcell_PIind4x_CsAindependent		0.00116972		DUSP2 GPR183 B2 SNX9
Tcell_PIind4x_Feske_Fig4		2.331e-06	TMCC2	BAG3 BCAR3 CD4 CD44 CD69 EVI2A GPR183 IL13RA1 NR4A3 SLA SNX9
Tcell_PIind4x_Feske_Fig6		7.81434e-06		CD4 CD44 CD72 DUSP2 FYN GZMB KLF9 NR4A3 SLA SOCS3 TNFSF9
Tcell_PIind_CalciumDefPtdown4x_Feske_Fig4		0.0116268	HIST1H2AC TMCC2	BCAR3 CD4 CD48 EVI2A SLA
Tcell_PIind_CalciumDefPtdown4x_Feske_Fig6		9.39229e-06		CD27 CD72 GZMB IL18R1 KLF9 NR4A3 NT5E SLA SOCS3 TNFSF9
Tcell_PIind_CsAdown4x		1.35271e-05		CD72 GZMB HSPA1A IL18R1 KLF9 NR4A3 SLA SOCS3 TNFSF9
Tcell_PIrep4x_Feske_Fig4		0.0281687		LCK PDCD4 SKAP1
Tcell_PIrep_CalciumDefPtup4x_Feske_Fig6		0.0048151		EGR1 ITGAM ITGB2 ITGB7 LCK
Tcell_cytokine_induced_IL4only	0.0301901		HOMER2 IL4R
Tcell_cytokine_induced_PMBConly_Iinduced	0.0135928	0.0158184	IL4R PIM1 SOCS1 VIM	CD69 LCP2 PTPN7 TNFRSF1B
Tcell_cytokine_repressed		1.34106e-07	HIST1H2AC	CAMK4 CCR7 CD27 EPHB6 ITGAX ITGB7 PDCD4 PTPRN2 SELL
Thymic_DP_Tcell_gt_Thymic_SP_CD4+Tcell		0.0236597	FAIM RASSF6	CD1A CD1C CXXC5 DNMBP KIAA0182 UBASH3B
Thymic_DP_Tcell_gt_Thymic_progenitor_Tcell		0.0134943	RASSF6	DNMBP EGR1 EVI2A KBTBD11 SKAP1
Thymic_SP_CD4+Tcell_gt_Blood_CD4+Tcell		0.00440543	HIST1H2AC IGF2BP3 SPRED2	CD1A CXXC5 DUSP2 EGR1 EGR3 PTPRK RSE6
Thymic_SP_CD4+Tcell_gt_Thymic_DP_Tcell		2.0953e-09	HLA-H IL4R TBC1D4	AMICA1 BAG3 CCR7 CD27 CD44 GPR183 GPR65 IFITM1 IL2RB PMEPA1 PTCH1 PTPRJ SCML1 SELL TNFRSF1B VCL
Thymic_progenitor_Tcell_gt_Thymic_DP_Tcell		0.00622272		HES1 MPEG1 PLAC8 SELL
NFkB_Targets		0.0132042	PIM1 TFPI2 VIM	ABCB1 CCR7 CD44 CD48 CD69 HMOX1 PTGDS S100A6
BACH2_target_ChIPseq		5.29158e-05	BMP3 BMP7 BOLA1 CEBPB CHST15 CPNE2 DUSP8 EML6 FAIM HIST1H1B HIST1H1C HIST1H1D HIST1H2AC HIST1H2AH HIST1H2AL HIST1H2BC HIST1H2BD HIST1H2BK HIST1H3D HNRPLL HRK IGF2BP3 IRS1 LTBP1 MT1X MT2A NRN1 PIM1 PODXL2 PYHIN1 RASSF6 RPL9 SMAD1 SNORD17 SOCS1 SPRED2 TBC1D4 TBL1X TMCC2 TNS3 TP53INP1 VANGL2 VIM WNK2	ABCA2 ABCG1 ACY3 AFF1 AMICA1 ANXA4 ARHGAP15 ATP2B4 BATF2 BCAR3 BCL9L BLVRB BRI3BP CCDC50 CCR6 CCR7 CD1C CD27 CD68 CD69 CD72 CEACAM21 CECR1 CLCF1 CPEB4 CTSC CXCR3 DJB4 DSE1L3 DOK3 DSE DUSP2 EGR2 EGR3 EGR4 ENTPD1 EPB41L2 FAM167A FAM49A FAM65A FCHO1 FCRL4 GPR114 HCST HDAC9 HES1 HEXIM1 HIST3H2A HIVEP2 HPCAL1 IER2 IQGAP2 ITGB7 JUP KCTD12 KIAA0182 KIAA1274 LAX1 LCK LCP2 LGALS1 LPAR5 LRRC33 MACF1 MAPK10…
EZH2_target_ChIP	0.0223669	0.00357177	ARHGAP10 BMP3 BMP7 CCDC85A CPNE2 CRMP1 CSDA DAB2IP FAM176B FOXD1 FXYD6 FZD6 GNG11 H1F0 HLA-G HRK LGR4 NRN1 PFN2 PIGZ PIM1 PRSS16 SDK1 SHANK2 SMAD1 TFPI2 TMEM22 TUBB6 ZNF358	AHK APP ATXN1 BLVRB CA8 CCDC50 CD300A CD44 CPEB4 DJB4 DUSP4 EGR3 EGR4 FAM65A FYN GDPD5 HES1 HOXB4 HPCAL1 IFITM1 IL13RA1 LHFP LRRC33 LY6E MYOM2 NFIL3 NOL4 NR3C2 NT5E PCDHGC3 PLAC8 PLXNC1 PMEPA1 PRICKLE1 PRKCH PTPRJ PTPRK RAB34 RGMB SESTD1 SLC38A2 SNX9 SYCE1 SYNGR3 TBC1D9 TBKBP1 TGFBR1 THRB TNFRSF13B TP73 UST VASH2
denovobivGenes		6.82426e-14	ARMCX2 BMP8A BNIP3 CHST15 FADS1 HRK MT2A PIGZ SYT17 TNS3 VIM	ABCA2 ABCG1 AFF1 ANXA4 APP ARHGAP18 ARID3A BHLHE41 BLVRB CAMK1D CCDC50 CD44 CERS6 CLCF1 CLMN DPYD EGR2 EPB41L2 EPHB6 FAM26F GALNT3 GDPD5 HEXIM1 HHAT HMOX1 HPCAL1 HSPA6 KIAA0182 KLF9 KLHL29 MLKL MYO15B PDCD4 PHF16 PIK3R5 PLXNC1 PREX1 PRICKLE1 PTPRJ RAB34 RNF130 S100A6 SCML1 SKI SLC12A6 SLC38A2 SLCO4A1 SNX9 SPG20 SYNGR3 TBC1D9 TNFRSF1B UST
NB_GCB_Progression_All_Genes_RPKM_enhancer_loss_minus3_minus4		9.31592e-12	LRFN3 TUBB6	ABCB1 AFF1 ARHGAP15 CCR7 CD72 CLCF1 CLNK DPYD ENPP2 GZMB IL13RA1 IQGAP2 LPAR5 MYBPC2 B2 NR3C2 NR4A3 NT5E OBFC2A PIK3R5 PLXNC1 PTGS1 PTPRK RASSF3 RILPL2 RIN3 SELL SELPLG SERPINB9 SLC12A6 SLC38A11 ST3GAL1 TTYH3 UBASH3B
NB_GCB_Progression_All_Genes_RPKM_minus2		2.27322e-18	CBR1 CHST15 CLEC4G CRMP1 CSDA L1CAM LRFN3 TNS3 TP53INP1	ABCB1 AHK APP ARHGAP18 ARL4A BIN2 CAMK1D CCDC106 CCR7 CD1C CD72 CEACAM21 CECR1 CLCF1 CLEC17A CLMN CPEB4 CYSLTR1 DOK2 ENPP2 ENTPD1 EPB41L2 FCRLB GAPT GPR183 GZMB HIVEP2 HMOX1 IQGAP2 ITGB2 KIAA0125 KLF11 KLF9 LAIR1 LPAR5 LRRC8C MACF1 MYBPC2 MYO7B B2 NCF2 NR3C2 PLAC8 PLCH2 PMEPA1 PTGS1 PTPRK PTPRN2 PTPRS RAB31 RILPL2 SERPINI1 SESTD1 SH3BP5 SIGLEC6 SKAP1 SLC12A7 SLC38A2 SLC9A9 SI1 SNX9 SRC ST3GAL1 SY…
NB_GCB_Progression_All_Genes_RPKM_minus5		2.34899e-07	TUBB6	BHLHE40 CCR6 CLNK DPYD DSE HDAC9 IL13RA1 MPEG1 MYOM2 NR4A3 NT5E PIK3R5 RUNX2 SELPLG SERPINB9 SKI SLA SLC12A6 SLC38A11 TLE1 TNFRSF1B
NB_GCB_Progression_All_Genes_RPKM_minus10		0.0123551		ADD3 AFF1 ARHGAP15 PLXNC1 RIN3 SELL
NB_GCB_Progression_All_Genes_RPKM_minus2.to.plus2		0.0345251	ANK1 APOD ATF5 BMP3 BMP8A CCL17 CEBPB CYTH3 DAB2IP DUSP8 ENPP3 EVC2 FADS2 FOXD1 FXYD6 GABARAPL1 GALNT9 GNG11 GPR128 H1F0 HIST1H2AC HIST1H2AL HIST1H2BK HOMER2 HRK KCNIP2 LGR4 MAP1LC3A MTUS2 MYL9 NDRG4 NGFRAP1 NRN1 PDE6B PYHIN1 SGCE SLMO1 SYT17 TCEAL4 TMCC2 USP44 ZNF358 ZNF595 ZNF77	ABCA2 ACP5 ADAM8 AMOT ANXA4 ARID3A ATP2B4 BACE2 BATF2 BCL9L BHLHE41 BRI3BP CASP8AP2 CCDC50 CD1A CD27 CD300A CD4 CD69 CD97 CEACAM1 CLIC3 CNKSR2 CTSC CXCR3 DSE1L3 EGR2 FAR2 FBXL7 FCRL3 FCRL4 FOLR2 FUCA2 GPR65 GYPE HES1 HHAT HOXB3 HSPA6 HSPA7 IER2 IFFO2 INF2 ITGAM ITGAX ITGB7 ITM2C JAM3 KBTBD11 KCTD12 KIAA0182 KIAA1274 KLF4 KLHL29 KLK1 KLRF1 LAX1 LCP2 LGALS1 LY6E LYZ MED12L MLKL NCEH1 NME4 NR4A1 OBF…
NB_GCB_Progression_All_Genes_RPKM_plus5		0.0309363	DNER IGF2BP3 PIM1 RASSF6 TBC1D4 TSHZ2	AMICA1 BFSP2 CA8 CAMK4 CD48 CXXC5 DHRS9 DMD GDPD5 GRAMD1B HPCAL1 LCK LRRC33
NB_GCB_Progression_All_Genes_RPKM_plus2		0.00206039	ARHGAP10 BAIAP2L1 EML6 GRAMD1C HIST1H2BD HNRPLL IL4R IRS1 ITPRIPL2 NKX6-3 PFN2 PIGZ PRSS16 SHANK2 SMAD1 TBL1X VANGL2 WNK2	ABCG1 ABI3 ALDH2 BAG3 CAMK2B CD44 DNMBP DUSP2 DUSP4 EGR1 FAM49A FCHO1 FGR FYN GALNT3 GCNT1 GPC4 HOPX IL12RB1 IL2RB INPP5A ITGB1 KLRB1 LHFP NFIL3 NOL4 NOTCH1 NTF3 PHF16 PRICKLE2 RASA3 RASSF4 SH3BP2 SPINK2 SRGN TEX9 TP73 UST ZNF718
GCB_BCL6SMRT_Distal_Enhancer		5.09111e-08	CEBPB DNER GRAMD1C HNRPLL IL4R NKX6-3 PIM1 SPRED2 TBL1X ZNF608	ACP5 ANXA4 ARRDC4 BCAR3 CA8 CCR6 CD97 CPEB4 DHRS9 DUSP4 EGR2 FCRL4 HES1 HMOX1 IL13RA1 INF2 KIAA0125 LMO2 MPEG1 RASGEF1B RASSF4 RUNX2 SH3BP2 SH3BP5 SLC12A7 SLC9A9 SNX9 SOCS3 TBC1D9 TNFRSF13B VASH2
GCB_bivalentProm_genes	0.00035601	6.94205e-12	ALKBH3 ARHGAP10 ARMCX2 BMP3 BMP8A BNIP3 CHST15 CPNE2 CYTH3 FADS1 FAM176B H1F0 HES6 HNRPLL HRK LGR4 LOC284801 LTK MT1X MT2A PFN2 PHGDH PIGZ SGCE SMAD1 SYT17 TBC1D4 TMCC2 TMEM22 TNS3 TRPC1 USP44 VIM WNK2	ABCA2 ABCG1 AFF1 ANXA4 APP ARHGAP18 ARID3A ATXN1 BHLHE41 BLVRB CA8 CAMK1D CCDC50 CD44 CERS6 CLCF1 CLMN DPYD DUSP4 EGR2 EGR4 EPB41L2 EPHB6 FAM26F GALNT3 GDPD5 HEXIM1 HHAT HMOX1 HOPX HOXB4 HPCAL1 HSPA6 IFFO2 KCTD12 KIAA0182 KLF4 KLF9 KLHL29 LHFP MLKL MYO15B NFIL3 NR3C2 NR4A3 PCDHGC3 PDCD4 PHF16 PIK3R5 PLXNC1 PREX1 PRICKLE1 PRKCH PTCH1 PTPRJ RAB15 RAB34 RNF130 S100A6 SCML1 SERPINB6 SHISA8 SKI SLC12A…
GC_termDiff_Genes		7.31952e-23	APOD DHX32 DUSP8 GALM GSTM1 H1FX HLA-H HNRPLL LRFN3 LTBP1 MT1X MT2A PYHIN1 SLC35D2 SMAD1 TSHZ2 TUBB6 VIM	ABCA2 ABCG1 AFF1 AHK APP ARHGAP15 ARHGAP18 ARID3A ATP2B4 ATXN1 BCL9L BHLHE40 BHLHE41 CA11 CA8 CAMK4 CCR7 CD4 CD44 CD48 CD97 CECR1 CERS6 CTSC CXCR3 CXXC5 CYSLTR1 DBP DOK2 DPYD EPHB6 EVI2A FYN GPR183 HCST HOPX HPCAL1 IFFO2 IFITM1 IFITM2 IL2RB IQGAP2 ITM2C KLK1 KLRB1 LAIR1 LAX1 LCK LCP2 LOC643733 LRRC33 LRRC8C LTBP3 LY6E MLKL NR3C2 NR4A3 P2RY12 PDCD1 PDCD4 PIK3R5 PLAC8 PRKCH PTPRN2 RILPL2 RIN3 RSE4 …
Ly1_BCL6RD2mut_upreg	8.44229e-09	1.85081e-16	ATF5 CPNE2 CSDA DHX32 DUSP8 EMILIN2 FADS1 FAM176B FES FLJ10038 FOXD1 H1F0 H1FX HIST1H1C HIST1H1D HIST1H2AC HIST1H2BC HIST1H2BD HIST1H2BK HIST1H3D HNRPLL HRK KDELC2 LOC100128398 LOC283663 LTK MYL9 NDRG4 NRN1 PITPNC1 RASSF6 SGCE SLC35D2 SMAD1 SNORA22 TMCC2 TMEM22 TP53INP1 TUBB6 VANGL2 VIM ZNF608	AFF1 AHK ARHGAP15 ARID3A ATP2B4 ATXN1 BCL9L BFSP2 BHLHE40 BHLHE41 CAMK1D CCR7 CD1C CD68 CD69 CD72 CD97 CEACAM21 CECR1 CLEC17A CLMN CMAHP CYSLTR1 DBP DJB4 DOK3 EPB41L2 EPHB6 FAM24B FAM49A FCER1G GNGT2 GPC4 HDAC9 HSPA7 IFITM1 IFITM2 IL12RB1 IL13RA1 IQGAP2 ITM2C KLF9 KLHL29 LAIR1 LGALS1 LINC00426 LOC283070 LOC285972 LRRC33 LRRC8C LYZ MYBPC2 B2 NOL4 PARP15 PHF16 PIEZO1 PLXNC1 PREX1 PRKCH PTGS1 PTPN7 …
Ly1_siBCL6_48h_upreg	0.00591256	2.94033e-26	ATF5 BMP3 CPNE2 EMILIN2 FES FOXD1 H1F0 H1FX H1FX-AS1 HRK KDELC2 LGR4 LTK MYL9 NDRG4 PITPNC1 PYHIN1 RASSF6 SGCE SLC35D2 SMAD1 TUBB6 VIM ZNF608	ABCB1 ABCG1 ADD3 AFF1 AHK AMICA1 ANGPTL6 ARHGAP15 ARID3A ATP2B4 ATXN1 BHLHE41 CAMK1D CCR6 CCR7 CD1C CD69 CD97 CEACAM21 CECR1 CLEC17A CLMN CNKSR2 CYSLTR1 DBP DMD DJB4 EPB41L2 EPHB6 EVI2A FAM49A GDPD5 GPC4 HDAC9 HEXIM1 HIVEP2 HSPA7 IFITM2 IQGAP2 ITM2C JAM3 KCTD12 KLF9 KLRB1 LAIR1 LAX1 LGALS1 LOC283070 LOC285972 LRRC33 LRRC8C MIR4649 MLKL MYBPC2 NCF2 NOL4 PARP15 PDCD1 PDCD4 PHF16 PRICKLE1 PRKCH PTGS…
ly1.promoter.BCL6.all.3140		4.63075e-06	ANK1 BMP3 DAB2IP FADS2 GABARAPL1 GRAMD1C H1FX HIST1H1C HIST1H1D HIST1H2AC HIST1H2AH HIST1H2BC HIST1H2BD HIST1H2BK HIST1H3D HIST1H4F HNRPLL IGF2BP3 IRS1 LOC150568 LOC283663 LTBP1 MIR486 MT2A NRN1 PITPNC1 RASSF6 RMRP RPL9 SDK1 SGCE SLC30A4 SLMO1 SNORA14B SPRED2 TBL1X ZNF595 ZNF608	ABCG1 ACPP ACY3 AFF1 ANGPTL6 ARHGAP15 ARID3A ATXN1 BIN2 BRI3BP CA11 CA8 CAMK4 CCR6 CD68 CD69 CD72 CLCF1 CTSC CYSLTR1 DBP DMD DJB4 DOK3 DSE DUSP2 EGR2 EGR3 FAM49A FCRL3 FCRL4 FCRLB GAPT GCNT1 GPR114 GPR183 GPR65 HDAC9 HEXIM1 HIVEP2 IER2 IQGAP2 ITGB1 KCTD12 KIAA1274 KLF9 LAX1 LCK LOC100134368 LPAR5 LRRC33 MED12L MIR1281 MIR23A MLKL MPEG1 NCEH1 NFIL3 NFKBID NOTCH1 NR4A3 P2RY12 PARP15 PDCD4 PLAC8 PLD…
ly1.promoter.BCL6.SMRT.BCOR.341		1.16946e-08	RASSF6 SLC30A4 SPRED2 TBL1X ZNF595	ACY3 AFF1 ARHGAP15 ARID3A BRI3BP CCR6 CD69 CD72 DBP EGR2 HDAC9 HEXIM1 IQGAP2 LRRC33 MPEG1 NFKBID PARP15 PLD4 PRICKLE1 SELPLG SLA TLR4 TNFRSF1B TNFSF9 ZNF718
ly1.promoter.BCL6-SMRT.all.451		4.50667e-08	RASSF6 SLC30A4 SPRED2 TBL1X ZNF595	ACY3 AFF1 ARHGAP15 ARID3A BRI3BP CCR6 CD68 CD69 CD72 DBP DMD EGR2 GPR183 HDAC9 HEXIM1 IQGAP2 LRRC33 MPEG1 NFKBID PARP15 PLD4 PRICKLE1 SELPLG SLA TLR4 TNFRSF1B TNFSF9 ZNF718
ly1.promoter.BCL6-BCOR.all.2142		9.39229e-06	ANK1 BMP3 FADS2 GABARAPL1 GRAMD1C H1FX HIST1H1C HIST1H1D HIST1H2AC HIST1H2BD HIST1H4F HNRPLL IGF2BP3 IRS1 LTBP1 MIR486 MT2A NRN1 PITPNC1 RASSF6 RMRP SDK1 SGCE SLC30A4 SLMO1 SPRED2 TBL1X ZNF595	ACY3 AFF1 ARHGAP15 ARID3A ATXN1 BIN2 BRI3BP CA11 CA8 CAMK4 CCR6 CD69 CD72 CLCF1 CTSC DBP DOK3 DSE DUSP2 EGR2 EGR3 GCNT1 GPR114 HDAC9 HEXIM1 HIVEP2 IER2 IQGAP2 KCTD12 KIAA1274 KLF9 LCK LPAR5 LRRC33 MED12L MLKL MPEG1 NCEH1 NFIL3 NFKBID NOTCH1 NR4A3 PARP15 PLAC8 PLD4 PRICKLE1 PTCH1 PTPN6 RASA3 RASGEF1B RASSF3 RSE4 SELPLG SLA SLC12A6 SLC38A2 SNORD12C SOCS3 ST3GAL1 SYNGR3 TGFBR1 TLR4 TNFRSF1B TNFSF9 T…
ly1.enhancer.DISTAL.BCL6-SMRT.DRE.553		1.89152e-05	CHST15 GABARAPL1 GALM IL4R PIM1 PPP1R2P9 SPRED2 TBL1X TNS3 TP53INP1 ZNF608	BCAR3 BFSP2 BHLHE41 CA8 CD1A CD69 CPEB4 FCRL4 GAPT HDAC9 ITGB1 KIAA0125 KIAA1274 MPEG1 NR3C2 OBFC2A PTPRJ RASGEF1B RUNX2 SERPINB9 SERPINI1 SLC38A2 SNX9 SPINK2 ST3GAL1 TNFSF9
ly1.enhancer.INTRONIC.BCL6-SMRT.DRE.807		4.60045e-08	ANK1 ARHGAP10 BMP7 HRK IGF2BP3 IRS1 LTBP1 RASSF6 SDK1 SMAD1 SPRED2 WNK2 ZNF608	ABCB1 ABCG1 ADD3 AFF1 ARHGAP18 BFSP2 CAMK4 CCR6 CLEC17A CNKSR2 CYSLTR1 DMD DNMBP FAM49A FCRL3 FCRL4 FYN GCNT1 GPC4 HDAC9 HIVEP2 HPCAL1 ITGB7 LCK PCDHGC3 PLXNC1 PRICKLE1 PRKCH PTPRJ RASA3 RILPL2 RNF130 SEMA4A SERPINI1 SLC9A9 ST3GAL1 TGFBR1 TLE1 UBASH3B
ly1.enhancer.INTRONIC.DISTAL.BCL6-SMRT.DRE.1275	0.0165578	2.6215e-11	ANK1 ARHGAP10 BMP7 CHST15 GABARAPL1 GALM HRK IGF2BP3 IL4R IRS1 LTBP1 PIM1 PPP1R2P9 RASSF6 SDK1 SMAD1 SPRED2 TBL1X TNS3 TP53INP1 WNK2 ZNF608	ABCB1 ABCG1 ADD3 AFF1 ARHGAP18 BCAR3 BFSP2 BHLHE41 CA8 CAMK4 CCR6 CD1A CD69 CLEC17A CNKSR2 CPEB4 CYSLTR1 DMD DNMBP FAM49A FCRL3 FCRL4 FYN GAPT GCNT1 GPC4 HDAC9 HIVEP2 HPCAL1 ITGB1 ITGB7 KIAA0125 KIAA1274 LCK MPEG1 NR3C2 OBFC2A PCDHGC3 PLXNC1 PRICKLE1 PRKCH PTPRJ RASA3 RASGEF1B RILPL2 RNF130 RUNX2 SEMA4A SERPINB9 SERPINI1 SLC38A2 SLC9A9 SNX9 SPINK2 ST3GAL1 TGFBR1 TLE1 TNFSF9 UBASH3B
GCB.promoter.BCL6.all.5541		6.74052e-05	ALKBH3 ANK1 ARHGAP10 BOLA1 EML6 FADS1 FADS2 FAIM FES FLJ10038 GRAMD1C HIST1H1B HIST1H1D HIST1H2AC HIST1H2AH HIST1H2BC HIST1H2BD HIST1H2BK HIST1H3D HIST1H4F HRK IGF2BP3 IRS1 LOC401588 MT2A PIM1 PITPNC1 RASSF6 RMRP RPL9 SDK1 SGCE SLC30A4 SLMO1 SNORA14B SNORA60 SNORD17 SOCS1 SPRED2 TBC1D4 TBL1X TSTD1 VIM ZNF154 ZNF155 ZNF595 ZNF608 ZNF879	ABCG1 ACY3 ADAM8 AFF1 ALDH2 AMICA1 ANGPTL6 APP ARHGAP15 ARID3A ARL4A ATXN1 BCAR3 BHLHE41 BIN2 BRI3BP CA11 CAMK1D CAMK4 CASP8AP2 CCDC106 CCDC50 CCNT1 CCR6 CD27 CD68 CD69 CD72 CLCF1 CLEC17A CTSC CXXC5 DBP DHRS9 DOK3 DSE DUSP2 DUSP4 EGR1 EGR2 EGR3 ENTPD1 FAM167A FAM26F FAM49A FCHO1 FCRL3 FCRL4 GAPT GCNT1 GDPD5 GPR114 GPR65 HCST HDAC9 HES1 HEXIM1 HIST3H2A HIVEP2 HOPX IER2 IQGAP2 ITGB1 ITGB2 JAM3 KCTD…
GCB.promoter.BCL6.SMRT.BCOR.1306		7.87291e-06	FLJ10038 RASSF6 SPRED2 TBC1D4 TBL1X ZNF595	ACY3 ADAM8 AFF1 ARHGAP15 ARID3A BIN2 BRI3BP CCR6 CD69 CD72 CLEC17A DBP DOK3 DSE DUSP2 EGR1 EGR2 FCHO1 GPR114 HCST HDAC9 HES1 HIVEP2 IER2 IQGAP2 LCK LMO2 LPAR5 LRRC33 MAPK10 MPEG1 NCF2 NFKBID NOTCH1 NR4A3 P2RY12 PARP15 PLD4 PRICKLE1 RASGEF1B SELPLG SNORD50A ST3GAL1 TLR9 TNFRSF1B TYROBP ZNF718
GCB.promoter.BCL6-SMRT.all.1306		7.87291e-06	FLJ10038 RASSF6 SPRED2 TBC1D4 TBL1X ZNF595	ACY3 ADAM8 AFF1 ARHGAP15 ARID3A BIN2 BRI3BP CCR6 CD69 CD72 CLEC17A DBP DOK3 DSE DUSP2 EGR1 EGR2 FCHO1 GPR114 HCST HDAC9 HES1 HIVEP2 IER2 IQGAP2 LCK LMO2 LPAR5 LRRC33 MAPK10 MPEG1 NCF2 NFKBID NOTCH1 NR4A3 P2RY12 PARP15 PLD4 PRICKLE1 RASGEF1B SELPLG SNORD50A ST3GAL1 TLR9 TNFRSF1B TYROBP ZNF718
GCB.promoter.BCL6-BCOR.all.5451		0.000752607	ALKBH3 ANK1 ARHGAP10 BOLA1 EML6 FADS1 FADS2 FAIM FES FLJ10038 GRAMD1C HIST1H1B HIST1H1D HIST1H2AC HIST1H2AH HIST1H2BC HIST1H2BD HIST1H2BK HIST1H3D HIST1H4F HRK IGF2BP3 IRS1 LOC401588 MT2A PIM1 PITPNC1 RASSF6 RMRP SDK1 SGCE SLC30A4 SLMO1 SNORA14B SNORA60 SOCS1 SPRED2 TBC1D4 TBL1X TSTD1 VIM ZNF154 ZNF155 ZNF595 ZNF608 ZNF879	ABCG1 ACY3 ADAM8 AFF1 ALDH2 AMICA1 ANGPTL6 APP ARHGAP15 ARID3A ARL4A ATXN1 BCAR3 BHLHE41 BIN2 BRI3BP CA11 CAMK1D CAMK4 CCDC106 CCDC50 CCNT1 CCR6 CD27 CD69 CD72 CLCF1 CLEC17A CTSC CXXC5 DBP DHRS9 DOK3 DSE DUSP2 DUSP4 EGR1 EGR2 EGR3 ENTPD1 FAM167A FAM26F FAM49A FCHO1 GAPT GCNT1 GDPD5 GPR114 GPR65 HCST HDAC9 HES1 HEXIM1 HIST3H2A HIVEP2 HOPX IER2 IQGAP2 ITGB1 ITGB2 JAM3 KCTD12 LCK LHFP LMO2 LOC100134…
GCB.promoter.BCL6.alone.106		0.00754679	RPL9 SNORD17	CASP8AP2 CD68 FCRL3 FCRL4 MYBPC2 PTPN7 SELL
LPC_LSC_52_Alizadeh_JAMA0		0.0308787		EVI2A HOPX PCDHGC3 SH3BP5
HSC20_Dick_tMed1		0.00124905	HIST1H2BC HIST1H2BD WBP5	ABCB1 HES1 HOPX HOXB3 KIAA0125 KLF4 PRKCH RUNX2 SPINK2
MEIS1_target_ChIPseq_Ebert_Cell1		0.000307352	DHX32 EMILIN2 IGF2BP3 TBC1D4 TNS3	AFF1 ARHGAP15 CERS6 CLIC3 DMD DPYD EGR2 FAR2 HIVEP2 HOXB3 IQGAP2 KLF9 MACF1 MYOM2 NR4A3 NT5E PLXNC1 PTPRK RASSF4 RIN3 SERPINB9 TPK1 UST
PU.1_target_ChIPseq_Ebert_Cell1		1.19277e-15	ANK1 ATF5 CHST15 DHX32 EMILIN2 FADS1 FAM127A FES FXYD6 GRAMD1C HIST1H2BK HRK IL4R LTBP1 PITPNC1 SGCE SHANK2 SPRED2 TBC1D4 TBL1X TFPI2 TMEM22 TNS3 TSHZ2	ABCA2 ABCB1 ABCG1 ADD3 AFF1 ALDH2 APP ARHGAP15 ARID3A ARL4A ATP2B4 ATXN1 BCAR3 BIN2 CCR6 CCR7 CD1C CD300A CD4 CD44 CD97 CECR1 CERS6 CLMN CLU CNKSR2 CTSC CYSLTR1 DHRS9 DMD DJB4 DNMBP DPYD DSE DUSP4 EGR2 ENPP2 ENTPD1 EPHB6 FAM49A FAR2 FGR FYN GCNT1 GNGT2 GPR65 HDAC9 HHAT HMOX1 HOPX HOXB3 HPCAL1 IL13RA1 IL18R1 IL2RB INPP5A IQGAP2 ITGAM ITGB1 ITGB2 ITGB7 JUP KLF9 KLHL29 LAIR1 LCK LCP2 LHFP LILRA4 LYZ…
PU.1_NB_prom		5.89361e-09	ACCS ALKBH3 ANK1 CBLN3 CHST15 EMILIN2 FADS2 FES FLJ10038 GRAMD1C HIST1H2AH HIST1H2AL HIST1H2BK HIST1H3D IGF2BP3 KDELC2 LOC283663 LOC401588 PODXL2 RMRP SLC30A4 SPRED2 TBC1D4 TFPI2 ZNF155 ZNF234 ZNF595 ZNF608 ZNF77	ABCG1 ABI3 ACP5 ACY3 ALDH2 AMICA1 ANGPTL6 ARID3A ARRDC4 BCAR3 BHLHE41 BIN2 BRI3BP CAMK1D CCNT1 CCR6 CCR7 CD300A CD68 CD69 CD72 CEACAM21 CLEC17A CLNK CXCR3 CXXC5 DBP DHRS9 DSE1L3 DOK3 DPYD DSE DUSP2 EGR3 ENTPD1 EPHB6 FAM167A GAPT GNGT2 GPR114 GPR183 GPR65 HCST HOPX IER2 IL12RB1 INPP5A IQGAP2 ITGAM ITGB2 ITGB7 KIAA1274 LCK LCP2 LILRA4 LILRB4 LMO2 LOC100134368 LOC645638 LPAR5 LRRC8C MAPK10 MIR1281 M…
PU.1_NB_enhancer		1.3928e-35	ABCC8 ACCS ANK1 APOD ARHGAP10 BAIAP2L1 CCL17 CHST15 CPNE2 CRMP1 CRYBA4 CSDA DAB2IP DNER EML6 ENPP3 FES GALM GPR128 GRAMD1C HIST1H2AH HIST1H2BK HNRPLL HOMER2 HRK IGF2BP3 IL4R IRS1 ITPRIPL2 KCNIP2 KDELC2 L1CAM LOC283663 LTBP1 MT1X MTUS2 NDRG4 PFN2 PIM1 PITPNC1 PODXL2 PPP1R2P9 PYHIN1 RASSF6 SDK1 SGCE SHANK2 SLC30A4 SOCS1 SPRED2 SYT17 TBC1D4 TBL1X TMCC2 TNS3 TP53INP1 TSHZ2 USP44 VANGL2 WNK2 ZNF595 ZN…	ABCB1 ABCG1 ABI3 ACP5 ACPP ACY3 ADD3 AFF1 AHK ALDH2 AMICA1 AMOT ANXA4 APP ARHGAP15 ARHGAP18 ARID3A ATP2B4 ATXN1 BACE2 BAG3 BCAR3 BCL9L BHLHE40 BHLHE41 BLVRB BRI3BP CAMK1D CAMK2B CAMK4 CCDC50 CCR6 CCR7 CD1A CD1C CD300A CD4 CD44 CD48 CD69 CD97 CEACAM1 CEACAM21 CECR1 CGA CLEC17A CLIC3 CLMN CLNK CNKSR2 CPEB4 CTSC CXCR3 CXXC5 CYSLTR1 DHRS9 DMD DSE1L3 DNMBP DOK2 DOK3 DPYD DSE DUSP2 EGR2 EGR3 EGR4 ENPP2…
PU.1_NB_all		1.391e-36	ABCC8 ACCS ALKBH3 ANK1 APOD ARHGAP10 BAIAP2L1 CBLN3 CCL17 CHST15 CPNE2 CRMP1 CRYBA4 CSDA DAB2IP DNER EMILIN2 EML6 ENPP3 FADS2 FES FLJ10038 GALM GPR128 GRAMD1C HIST1H2AH HIST1H2AL HIST1H2BD HIST1H2BK HIST1H3D HNRPLL HOMER2 HRK IGF2BP3 IL4R IRS1 ITPRIPL2 KCNIP2 KDELC2 L1CAM LOC255512 LOC283663 LOC344595 LOC401588 LTBP1 MT1X MT2A MTUS2 NDRG4 NRN1 PFN2 PIM1 PITPNC1 PODXL2 PPP1R2P9 PYHIN1 RASSF6 RMRP …	ABCB1 ABCG1 ABI3 ACP5 ACPP ACY3 ADD3 AFF1 AHK ALDH2 AMICA1 AMOT ANGPTL6 ANXA4 APP ARHGAP15 ARHGAP18 ARID3A ARRDC4 ATP2B4 ATXN1 BACE2 BAG3 BCAR3 BCL9L BFSP2 BHLHE40 BHLHE41 BIN2 BLVRB BRI3BP CA11 CAMK1D CAMK2B CAMK4 CASP8AP2 CCDC50 CCNT1 CCR6 CCR7 CD1A CD1C CD300A CD4 CD44 CD48 CD68 CD69 CD72 CD97 CEACAM1 CEACAM21 CECR1 CGA CLEC17A CLIC3 CLMN CLNK CNKSR2 CPEB4 CTSC CXCR3 CXXC5 CYSLTR1 DBP DHRS9 DM…
PU.1_CB_prom		2.34505e-05	ACCS ALKBH3 ANK1 CBLN3 CHST15 FES FLJ10038 GRAMD1C HIST1H2AH HIST1H2BK HRK LOC150568 LOC283663 PODXL2 RMRP SNORA60 SNORD17 SPRED2 TBC1D4 TFPI2 ZNF234 ZNF595 ZNF608 ZNF77	ABCG1 ABI3 ACPP ACY3 AMICA1 ANGPTL6 ARID3A BCAR3 BIN2 CCR6 CD300A CD68 CD72 CEACAM21 CLEC17A CLNK CXCR3 DHRS9 DSE1L3 DOK3 DSE DUSP2 ENTPD1 EPHB6 GAPT GNGT2 GPR114 GPR65 HCST HOPX IER2 ITGAM ITGB2 ITGB7 KIAA1274 LCK LCP2 LILRA4 LMO2 LOC100134368 LOC645638 LPAR5 MAPK10 MIR1281 MIR23A MLKL MNDA MPEG1 MYBPC2 NCEH1 NCF2 NFKBID PARP15 PIK3R5 PLD4 PTCH1 PTPN22 PTPN6 PTPN7 RAB31 RASA3 RILPL2 RSE4 RSE6 RP…
PU.1_CB_enhancer		4.99635e-32	ABCC8 ACCS ANK1 APOD ARHGAP10 BAIAP2L1 BNIP3 CCL17 CHST15 DAB2IP DNER EML6 ENPP3 FES GALM GPR128 GRAMD1C HIST1H2AH HIST1H2BK HNRPLL HOMER2 HRK IGF2BP3 IL4R IRS1 ITPRIPL2 KCNIP2 L1CAM LOC150568 LTBP1 MT1X MTUS2 NDRG4 PIM1 PITPNC1 PODXL2 PPIEL PPP1R2P9 PYHIN1 RASSF6 SDK1 SGCE SHANK2 SOCS1 SPRED2 SYT17 TBC1D4 TBL1X TNS3 TP53INP1 TSHZ2 WNK2 ZNF595 ZNF608	ABCB1 ABCG1 ABI3 ACP5 ACPP ACY3 AFF1 AHK ALDH2 AMICA1 AMOT ANXA4 APP ARHGAP15 ARHGAP18 ARID3A ATP2B4 ATXN1 BAG3 BCAR3 BCL9L BFSP2 BHLHE40 BHLHE41 BLVRB CAMK1D CAMK2B CAMK4 CCR6 CCR7 CD1A CD1C CD300A CD4 CD44 CD48 CD69 CD97 CEACAM1 CEACAM21 CECR1 CGA CLEC17A CLIC3 CLMN CLNK CNKSR2 CPEB4 CTSC CXXC5 CYSLTR1 DHRS9 DMD DSE1L3 DNMBP DOK2 DOK3 DSE DUSP2 EGR2 EGR3 EGR4 ENPP2 ENTPD1 FAM167A FAM26F FAM49A …
PU.1_CB_all		6.4859e-32	ABCC8 ACCS ALKBH3 ANK1 APOD ARHGAP10 BAIAP2L1 BMP8A BNIP3 CBLN3 CCL17 CHST15 DAB2IP DNER EML6 ENPP3 FES FLJ10038 GALM GPR128 GRAMD1C HIST1H2AH HIST1H2BK HNRPLL HOMER2 HRK IGF2BP3 IL4R IRS1 ITPRIPL2 KCNIP2 L1CAM LOC150568 LOC255512 LOC283663 LOC344595 LTBP1 MT1X MTUS2 NDRG4 PIM1 PITPNC1 PODXL2 PPIEL PPP1R2P9 PYHIN1 RASSF6 RMRP SDK1 SGCE SHANK2 SNORA60 SNORD17 SOCS1 SPRED2 SYT17 TBC1D4 TBL1X TFPI2 …	ABCB1 ABCG1 ABI3 ACP5 ACPP ACY3 AFF1 AHK ALDH2 AMICA1 AMOT ANGPTL6 ANXA4 APP ARHGAP15 ARHGAP18 ARID3A ATP2B4 ATXN1 BAG3 BCAR3 BCL9L BFSP2 BHLHE40 BHLHE41 BIN2 BLVRB CAMK1D CAMK2B CAMK4 CASP8AP2 CCR6 CCR7 CD1A CD1C CD300A CD4 CD44 CD48 CD68 CD69 CD72 CD97 CEACAM1 CEACAM21 CECR1 CGA CLEC17A CLIC3 CLMN CLNK CNKSR2 CPEB4 CTSC CXCR3 CXXC5 CYSLTR1 DHRS9 DMD DSE1L3 DNMBP DOK2 DOK3 DSE DUSP2 EGR1 EGR2 EG…
IKZF1_CB_enhancer		3.89032e-06	SDK1 SPRED2 TNS3	ACY3 BRI3BP CD1C CD72 CXXC5 FAM167A FAM49A FAM65A GPR114 IER2 INF2 KIAA1274 LCK MIR23A PRKCH PTCH1 PTPN6 RIN3 SH3BP2 SIGLEC5 SLC45A3 SOCS3 ST3GAL1 TNFSF9
IKZF1_CB_all		0.000140986	FLJ10038 HIST1H2BD MIR663 PIGZ RMRP SDK1 SPRED2 TNS3 ZNF595	ACY3 BRI3BP CD1C CD72 CXXC5 DUSP2 EGR1 FAM167A FAM49A FAM65A GDPD5 GPR114 HCST HEXIM1 IER2 INF2 KIAA1274 LCK LMO2 MIR23A PRKCH PTCH1 PTPN6 RILPL2 RIN3 SELL SERPINI1 SH3BP2 SIGLEC5 SLC45A3 SNORD75 SOCS3 ST3GAL1 TLR9 TNFSF9 TYROBP ZBTB32 ZNF718
CTCF_NB_enhancer		1.52532e-09	ALKBH3 ANK1 ARHGAP10 ATF5 BAIAP2L1 BEX4 BMP3 BNIP3 CCL17 CCL28 CEBPB CHST15 CSDA CYTH3 DAB2IP DHX32 EML6 ENPP3 FADS2 FAIM FES FOXD1 FXYD6 GABARAPL1 GRAMD1C HIST1H1C HIST1H2AH HIST1H2BD HNRPLL IL4R IRS1 KCNIP2 LOC283663 LOC344595 LRFN3 LTBP1 MT1X MT2A MTUS2 MYL9 NDRG4 PFN2 PIGZ PIM1 PITPNC1 PODXL2 PPIEL RASSF6 SDK1 SHANK2 SLC30A4 SLC35D2 SOCS1 SYCE1L TBC1D4 TBL1X TMCC2 TNS3 TSHZ2 USP44 VIM WNK2 XI…	ABCB1 ABCG1 ACP5 ACPP ACY3 ADD3 AFF1 AHK ALDH2 AMICA1 ANGPTL6 ANXA4 APP ARHGAP15 ARHGAP18 ATP2B4 ATXN1 BACE2 BAG3 BCAR3 BCL9L BFSP2 BHLHE40 BLVRB CA8 CAMK1D CAMK2B CAMK4 CCDC50 CCR6 CCR7 CD1A CD300A CD44 CD48 CD69 CD72 CD97 CEACAM21 CECR1 CGA CLCF1 CLMN CLNK CLU CNKSR2 CPEB4 CXCR3 CXXC5 DHRS9 DMD DJB1 DSE1L3 DOK2 DOK7 DPYD DSE DUSP4 EGR2 EGR3 ENPP2 ENTPD1 EPB41L2 FAM167A FAM49A FAM65A FAR2 FCHO1 …
CTCF_NB_all		2.69193e-12	ACCS ALKBH3 ANK1 ARHGAP10 ATF5 BAIAP2L1 BEX4 BMP3 BNIP3 CCDC85A CCL17 CCL28 CEBPB CHST15 CRMP1 CSDA CYTH3 DAB2IP DHX32 EML6 ENPP3 EVC FADS2 FAIM FES FOXD1 FXYD6 GABARAPL1 GRAMD1C HIST1H1C HIST1H2AH HIST1H2BD HNRPLL HOMER2 IL4R IRS1 KCNIP2 KCNJ11 LOC255512 LOC283663 LOC344595 LRFN3 LTBP1 MT1X MT2A MTUS2 MYL9 NDRG4 PFN2 PHGDH PIGZ PIM1 PITPNC1 PODXL2 PPIEL RASSF6 RMRP SDK1 SHANK2 SLC30A4 SLC35D2 SM…	ABCA2 ABCB1 ABCG1 ABI3 ACP5 ACPP ACY3 ADD3 AFF1 AHK ALDH2 AMICA1 ANGPTL6 ANXA4 APP ARHGAP15 ARHGAP18 ARL4A ATP2B4 ATXN1 BACE2 BAG3 BATF2 BCAR3 BCL9L BFSP2 BHLHE40 BHLHE41 BLVRB CA11 CA8 CAMK1D CAMK2B CAMK4 CCDC106 CCDC50 CCR6 CCR7 CD1A CD300A CD44 CD48 CD69 CD72 CD97 CEACAM1 CEACAM21 CECR1 CGA CLCF1 CLMN CLNK CLU CNKSR2 CPEB4 CXCR3 CXXC5 DHRS9 DMD DJB1 DSE1L3 DNMBP DOK2 DOK3 DOK7 DPYD DSE DUSP4 E…
CTCF_CB_enhancer		5.51776e-07	ALKBH3 ANK1 ARHGAP10 ATF5 BAIAP2L1 BEX4 BMP3 BNIP3 CCL17 CCL28 CEBPB CHST15 CSDA DAB2IP DHX32 DNER EML6 ENPP3 EVC FAIM FES FOXD1 FXYD6 GABARAPL1 GRAMD1C HIST1H1C HIST1H2AH HIST1H2BD HNRPLL HRK IGF2BP3 IL4R IRS1 KCNIP2 LOC150568 LOC283663 LOC344595 LRFN3 LTBP1 MT1X MT2A MTUS2 MYL9 NDRG4 NRN1 PDE6B PIGZ PIM1 PITPNC1 PODXL2 PPIEL RASSF6 SDK1 SHANK2 SLC30A4 SLC35D2 SOCS1 SPRED2 SYCE1L SYT17 TBC1D4 TB…	ABCB1 ABCG1 ACP5 ACPP ACY3 ADD3 AFF1 AHK ALDH2 AMICA1 ANGPTL6 ANXA4 APP ARHGAP15 ARHGAP18 ARID3A ATP2B4 ATXN1 BACE2 BAG3 BCAR3 BCL9L BFSP2 BHLHE40 BLVRB CA8 CAMK1D CAMK2B CAMK4 CCDC50 CCR6 CCR7 CD300A CD44 CD48 CD69 CD72 CD97 CEACAM1 CEACAM21 CGA CLMN CLNK CLU CNKSR2 CPEB4 CXCR3 CXXC5 DHRS9 DMD DJB1 DSE1L3 DNMBP DOK2 DOK7 DPYD DSE DUSP4 EGR2 EGR3 ENPP2 ENTPD1 EPB41L2 FAM167A FAM49A FAM65A FAR2 FB…
CTCF_CB_all		1.48533e-09	ACCS ALKBH3 ANK1 ARHGAP10 ATF5 BAIAP2L1 BEX4 BMP3 BNIP3 CCDC85A CCL17 CCL28 CEBPB CHST15 CRMP1 CSDA DAB2IP DHX32 DNER ECHDC2 EML6 ENPP3 EVC FAIM FES FOXD1 FXYD6 GABARAPL1 GRAMD1C HIST1H1C HIST1H2AH HIST1H2BD HNRPLL HOMER2 HRK IGF2BP3 IL4R IRS1 KCNIP2 KCNJ11 LOC150568 LOC283663 LOC344595 LRFN3 LTBP1 MIR663 MT1X MT2A MTUS2 MYL9 NDRG4 NRN1 PDE6B PHGDH PIGZ PIM1 PITPNC1 PODXL2 PPIEL RASSF6 RMRP SDK1 …	ABCA2 ABCB1 ABCG1 ABI3 ACP5 ACPP ACY3 ADD3 AFF1 AHK ALDH2 AMICA1 ANGPTL6 ANXA4 APP ARHGAP15 ARHGAP18 ARID3A ARL4A ATP2B4 ATXN1 BACE2 BAG3 BCAR3 BCL9L BFSP2 BHLHE40 BLVRB CA11 CA8 CAMK1D CAMK2B CAMK4 CCDC106 CCDC50 CCR6 CCR7 CD300A CD44 CD48 CD69 CD72 CD97 CEACAM1 CEACAM21 CGA CLCF1 CLMN CLNK CLU CNKSR2 CPEB4 CXCR3 CXXC5 DHRS9 DMD DJB1 DSE1L3 DNMBP DOK2 DOK3 DOK7 DPYD DSE DUSP2 DUSP4 EGR1 EGR2 EGR…
CTCF_ly1_enhancer		6.98643e-06	ABCC8 ALKBH3 ANK1 APOD ARHGAP10 ATF5 BAIAP2L1 BEX4 BMP3 BMP7 BMP8A BNIP3 CBR1 CCDC85A CCL17 CCL28 CEBPB CHST15 CPNE2 CRMP1 CRYBA4 CSDA CYB5A CYTH3 DAB2IP DHX32 DNER DUSP8 ECHDC2 EMILIN2 EML6 ENPP3 EVC EVC2 FADS2 FES FOXD1 FXYD6 FZD6 GABARAPL1 GALM GALNT9 GPR128 GRAMD1C H1F0 HIST1H1C HIST1H2AH HIST1H2BD HIST1H3D HNRPLL HOMER2 HRK IGF2BP3 IL4R IRS1 KCNIP2 L1CAM LGR4 LOC150568 LOC283663 LOC344595 LR…	ABCA2 ABCB1 ABCG1 ABI3 ACP5 ACPP ACY3 ADD3 AFF1 AHK ALDH2 AMICA1 AMOT ANGPTL6 ANXA4 APP ARHGAP15 ARHGAP18 ARID3A ARL4A ARRDC4 ATP2B4 ATXN1 BACE2 BAG3 BCAR3 BCL9L BFSP2 BHLHE40 BHLHE41 BLVRB BRI3BP CA8 CAMK1D CAMK2B CAMK4 CCDC50 CCR6 CCR7 CD1A CD300A CD44 CD48 CD69 CD72 CD97 CEACAM1 CEACAM21 CECR1 CGA CLCF1 CLMN CLNK CLU CNKSR2 CPEB4 CTSC CXCR3 CXXC5 DHRS9 DMD DJB1 DSE1L3 DNMBP DOK2 DOK3 DOK7 DPYD…
CTCF_ly1_all		2.2683e-05	ABCC8 ACCS ALKBH3 ANK1 APOD ARHGAP10 ATF5 BAIAP2L1 BEX4 BMP3 BMP7 BMP8A BNIP3 CBLN3 CBR1 CCDC85A CCL17 CCL28 CEBPB CEBPD CHST15 CPNE2 CRMP1 CRYBA4 CSDA CYB5A CYTH3 DAB2IP DHX32 DNER DUSP8 ECHDC2 EMILIN2 EML6 ENPP3 EVC EVC2 FADS1 FADS2 FES FOXD1 FXYD6 FZD6 GABARAPL1 GALM GALNT9 GNG11 GPR128 GRAMD1C H1F0 H1FX HES6 HIST1H1C HIST1H2AH HIST1H2BD HIST1H3D HNRPLL HOMER2 HRK IGF2BP3 IL4R IRS1 KCNIP2 KCNJ…	ABCA2 ABCB1 ABCG1 ABI3 ACP5 ACPP ACY3 ADD3 AFF1 AHK ALDH2 AMICA1 AMOT ANGPTL6 ANXA4 APP ARHGAP15 ARHGAP18 ARID3A ARL4A ARRDC4 ATP2B4 ATXN1 BACE2 BAG3 BATF2 BCAR3 BCL9L BFSP2 BHLHE40 BHLHE41 BLVRB BRI3BP CA11 CA8 CAMK1D CAMK2B CAMK4 CCDC106 CCDC50 CCR6 CCR7 CD1A CD27 CD300A CD44 CD48 CD69 CD72 CD97 CEACAM1 CEACAM21 CECR1 CGA CLCF1 CLMN CLNK CLU CNKSR2 CPEB4 CTSC CXCR3 CXXC5 DBP DHRS9 DMD DJB1 DSE1…
P300_ly1_enhancer		0.000879768	ARHGAP10 BMP3 CHST15 GABARAPL1 HIST1H2BK HOMER2 HRK IGF2BP3 IL4R NKX6-3 PIM1 SLMO1 SMAD1 SPRED2 TMCC2 TNS3 WNK2 ZNF608	ABCG1 ACY3 AFF1 BFSP2 BHLHE41 CA11 CD48 CPEB4 CXXC5 DMD DOK3 FCHO1 FGR GCNT1 GPC4 HES1 IL12RB1 INF2 LPAR5 MPEG1 NFKBID NR4A3 PLAC8 PLD4 PRKCH PTCH1 PTPN6 PTPRJ RASA3 SEMA4A SERPINB9 SLA ST3GAL1 TLE1 TNFSF9 UST
P300_ly1_all		1.391e-36	ABCC8 ACCS ALKBH3 ANK1 APOD ARHGAP10 BAIAP2L1 CBLN3 CCL17 CHST15 CPNE2 CRMP1 CRYBA4 CSDA DAB2IP DNER EMILIN2 EML6 ENPP3 FADS2 FES FLJ10038 GALM GPR128 GRAMD1C HIST1H2AH HIST1H2AL HIST1H2BD HIST1H2BK HIST1H3D HNRPLL HOMER2 HRK IGF2BP3 IL4R IRS1 ITPRIPL2 KCNIP2 KDELC2 L1CAM LOC255512 LOC283663 LOC344595 LOC401588 LTBP1 MT1X MT2A MTUS2 NDRG4 NRN1 PFN2 PIM1 PITPNC1 PODXL2 PPP1R2P9 PYHIN1 RASSF6 RMRP …	ABCB1 ABCG1 ABI3 ACP5 ACPP ACY3 ADD3 AFF1 AHK ALDH2 AMICA1 AMOT ANGPTL6 ANXA4 APP ARHGAP15 ARHGAP18 ARID3A ARRDC4 ATP2B4 ATXN1 BACE2 BAG3 BCAR3 BCL9L BFSP2 BHLHE40 BHLHE41 BIN2 BLVRB BRI3BP CA11 CAMK1D CAMK2B CAMK4 CASP8AP2 CCDC50 CCNT1 CCR6 CCR7 CD1A CD1C CD300A CD4 CD44 CD48 CD68 CD69 CD72 CD97 CEACAM1 CEACAM21 CECR1 CGA CLEC17A CLIC3 CLMN CLNK CNKSR2 CPEB4 CTSC CXCR3 CXXC5 CYSLTR1 DBP DHRS9 DM…
crebbp.ly7.enhancer		6.58258e-14		ABI3 ACSL1 ADD3 AFF1 AGBL4 AKNA ALDH3B2 AMOT ARHGAP18 ARHGAP27 ATG4C BATF2 BRI3BP CAMK1D CCDC75 CCR1 CD27 CD300A CD48 CDC40 CDH1 CDYL CLEC17A COL24A1 CPEB4 CSK CYSLTR1 DBP DEPDC5 DLG4 DOK3 DSE ELP3 ENTPD1 EPB41L3 FAM167A FCER1G FCHO1 FCRLA FILIP1L FRMD4B GDF11 GIMAP8 GNB1 GNGT2 GRAP2 GUCY2D HBS1L HHAT HK3 HMBOX1 HPCAL1 IKZF1 IL12RB1 INPP5B INSC JAK2 KIAA1274 KLHL29 KLRF1 LASP1 LATS1 LOC100134368 …
crebbp.ly7.prom		6.37506e-06		ABI3 ADD3 AFF1 AKNA ARL6IP5 ATG4C BPGM BRI3BP CAPN14 CASP8AP2 CCDC106 CD27 CD300A CD48 CD68 CD72 CDC40 CLEC17A CPEB4 CSK DBP DEPDC5 DNAJB4 DOK3 ELP3 FAM167A FCRLA FRYL GNB1 GNGT2 GRAP2 HCST HMBOX1 IKZF1 INSC KIAA1274 LASP1 LOC100134368 MAP3K14 MAP3K7 MBD4 NAA35 NADK NCEH1 NFE2L2 NGLY1 NWD1 PARP15 PDCD4 PIAS1 PIK3AP1 PLCG2 PTCRA PTPN22 RAB13 RBM47 RFX3 SACM1L SERP1 SERPINB1 SERPINI1 SGSM3 SIGLEC9 …
Tcell_down_Ebert_cell1	0.00101577	3.88981e-13	CHST15 CSDA FADS1 FES GNG11 H1F0 HIST1H1C HIST1H1D HIST1H2AC HIST1H2BD HIST1H2BK HIST1H3D IGF2BP3 LTBP1 SMAD1 SPRED2 TMCC2 TNS3 TUBB6	ALDH2 ANXA4 ARID3A BLVRB CD1C CST3 DHRS9 DNMBP DSE EGR1 EGR3 ENTPD1 EPB41L2 FAM49A FCER1G GCNT1 HDAC9 HES1 HMOX1 HSPA1A HSPA1B HSPA6 IL13RA1 ITGAM ITGAX ITM2C JUP KIAA0125 KIAA0182 KLF4 LHFP LMO2 LYZ MILR1 MNDA NME4 PHF16 PTGS1 RAB13 RAB31 RSE6 RNF130 SERPINI1 SIGLEC5 TBC1D9 TLR4 TYROBP VASH2
Bcell_up_Ebert_cell1		0.00031522	CHST15 DUSP8 FLJ10038 GRAMD1C HRK IL4R IRS1 PRSS16 SYT17 ZNF154 ZNF528	ADD3 ANXA4 BACE2 BHLHE41 CCR6 CD1C CD72 CLCF1 DMD DNMBP DSE EGR3 EPB41L2 FAM49A FAM65A GALNT3 GPR183 HDAC9 HES1 JAM3 KIAA0125 KLF11 KLF9 KLK1 NR3C2 NR4A1 NT5E PDCD4 PHF16 PTPRK SH3BP5 SNX9 STEAP1B SYNPO TBC1D9 THRB TLE1 TNFRSF13B TNFSF9 UGT8 UST
Bcell_down_Ebert_cell1		0.0327502	CEBPD EMILIN2 FADS1 GABARAPL1 H1F0 MT2A SMAD1	ATP2B4 CD300A CTSC FAR2 FCER1G HSPA1A IQGAP2 LCP2 PRKCH RAB13 S100A4 SELPLG
NK_up_Ebert_cell1		1.82934e-11	PITPNC1	ABCB1 BIN2 CD300A CD97 CLIC3 FGR GNGT2 GZMB HOPX IL18R1 IL2RB ITGAX ITGB2 KLRB1 KLRF1 LAIR1 MYOM2 TBX21 TYROBP
HSC_up_Ebert_cell1	0.00035601		BEX4 FADS1 FAIM FXYD6 FZD6 GNG11 H1FX HIST1H1D HIST1H2BD HIST1H2BK HIST1H3D NGFRAP1 PFN2 PHGDH SMAD1 SPRED2 TCEAL4 TMEM22 TNS3 TRIP6 WBP5	ABCG1 CERS6 CMAHP EGR3 GCNT1 HHAT HOPX IQGAP2 ITM2C JUP KIAA0125 LHFP NOTCH1 PHF16 RAB13 SERPINB6 SPG20 SPINK2 VASH2
HSC_down_Ebert_cell1		0.00225076		CCR7 DOK2 GNGT2 GPR183 GPR65 ITGB7
HSC_e-ERY_down_Ebert_cell1		1.18969e-09	CHST15 HLA-G IL4R PITPNC1 PYHIN1 SOCS1	CCR6 CCR7 CD27 CD4 CD44 CD48 CD97 CXCR3 DOK2 FAM49A FGR FYN GNGT2 GPR183 GPR65 IL13RA1 IL2RB ITGB2 ITGB7 KLF9 KLRF1 LCK NR3C2 NT5E PTCH1 PTPN22 PTPRJ SELPLG SH3BP5 SKAP1 TBC1D9 TBX21 TLE1 TNFRSF1B TPK1
ERY_down_Ebert_cell1		0.000625801	CEBPB ECHDC2 FLJ10038 HLA-G IL4R PITPNC1 RPL9 SLC35D2 SOCS1 TBL1X VIM	ABCB1 ABCG1 ADAM8 AHK ANXA4 ARHGAP15 BIN2 CCNT1 CCR6 CD44 CD48 CD69 CECR1 DNMBP DPYD EVI2A FYN GALNT3 GNGT2 GPR183 GPR65 HIVEP2 IER2 IFITM1 IFITM2 ITGB2 ITGB7 KLF11 KLF9 LAIR1 LCK LCP2 MACF1 MAPK10 PDCD4 PLAC8 PRKCH PTPN22 PTPN6 RASSF3 RIN3 SCML1 SELL SERPINB9 SH3BP5 SKAP1 SLA TPK1
GMP_up_Ebert_cell1		3.55132e-24	CEBPB CEBPD CHST15 EMILIN2 FES IGF2BP3 TBL1X VIM	ALDH2 CALHM2 CD1A CD1C CD4 CD68 CEACAM1 CECR1 CST3 CTSC DHRS9 DNMBP DOK2 DSE EGR2 ENTPD1 EVI2A FAM49A FCER1G FGR GPR65 HDAC9 HMOX1 HSPA1A HSPA6 IFITM2 IL13RA1 ITGAM ITGAX ITGB2 KBTBD11 KCTD12 KLF4 LAIR1 LGALS1 LILRA4 LYZ MILR1 MNDA MS4A6A MYO1F NCF2 NFIL3 PTPN6 RAB31 RSE4 RSE6 RNF130 S100A4 S100A6 SEMA4A SH3BP2 SIGLEC5 SMPDL3A SRGN TBC1D9 TLR4 TNFRSF1B TPK1 TYROBP
Intron_loss.ATAC.reads_CREBBP.KD		0.0212987	CHST15 PITPNC1	BAG3 BFSP2 CXXC5 DOK7 DSE EPB41L2 LHFP NT5E PLD4 PRKCH SELL ST3GAL1
c1.Ep300.up_381	1.26203e-15		ACCS ATF5 BMP8A BOLA1 CBLN3 CBR1 CEBPB CES4A EID3 EMILIN2 ENPP3 FAM127A GRAMD1C IL4R ITPRIPL2 KDELC2 LOC100507254 LOC255512 LTBP1 PPIEL RMI2 SLMO1 SNORA60 SNORD17 SOCS1 TUBB6 ZNF234 ZNF514	EPB41L2
c1.Ep300.down_692		1.07856e-72		ABI3 ACY3 AFF1 ARID3A ARRDC4 BACE2 BAG3 BATF2 BFSP2 BHLHE40 BIN2 BRI3BP C11ORF85 C1ORF228 C3ORF25 C7ORF50 C8ORF83 CAMK1D CCNT1 CCR6 CD1A CD1C CD72 CEACAM1 CERS6 CLCF1 CLEC17A CLEC4C CLNK CPEB4 CYSLTR1 DHRS9 DJB4 DNMBP DOK3 DUSP4 ENTPD1 FAM167A FAM26F FAR2 FCHO1 FCRL3 FCRL4 FUCA2 GALNT3 GPAT2 GPC4 HDAC9 HOXB4 HPCAL1 HSP90AA4P HSP90AB3P HSPA1A IQGAP2 KBTBD11 KCTD12 KIAA0182 KLHL29 KLK1 KLRF1 LHFP L…
c2.Crebbp.up_205	4.02047e-07		BMP3 DAB2IP EML6 GNG11 HRK IGF2BP3 LTBP1 MIR486 PHGDH SGCE TFPI2 TMEM22 USP44 VANGL2	MIR568
c2.Crebbp.down_295		5.49265e-80	ARHGAP10	ABCB1 ACY3 ADAM8 ANXA4 ARHGAP18 ARSD ATP2B4 BHLHE41 CD300A CD68 CERS6 CLIC3 CXCR3 DHRS9 DOK2 DPYD FCHO1 FOLR2 GDPD5 GPC4 GYPE HIST3H2A IFFO2 IL13RA1 INPP5A ITGAM ITGB2 ITGB7 ITM2C JAM3 KIAA0125 KIAA0182 KLF4 KLHL29 LAIR1 LCN10 LCP2 LDOC1 LHFP LILRA4 LMO2 LOC100505746 LOC643733 LOXL2 LRRC33 LRRC56 LY6E MGC39372 MYO15B MYO1F NCF2 NT5E PIEZO1 PIK3R5 PLAC8 PLCH2 PLD4 PREX1 PRICKLE1 PTPN6 PTPRK RAB31 …
shCrebbp.down_1028		0.0389545		ACP5 ALDH2 AMICA1 CD48 CD69 CST3 CXCR3 DBP DNAJB1 FAM167A FGR GNGT2 HCST IL12RB1 LGALS1 LY6E PLAC8 PTPN6 RPS28 S100A4 SELPLG SERPINI1 SNX9 SRGN TMEM55A TMEM71 TYROBP
SIGNAL_TRANSDUCTION		5.89349e-06	BNIP3 CCL17 DUSP8 GNG11 HOMER2 IL4R IRS1 KCNIP2 LTK PITPNC1 SMAD1 SOCS1 SPRED2 TBL1X TRIP6 WNK2	ANXA4 BCAR3 CAMK2B CAMK4 CASP8AP2 CCR6 CD27 CGA CLCF1 CLIC3 CXXC5 DOK2 DUSP2 DUSP4 ENPP2 FYN GPR65 GZMB HMOX1 IFITM1 IL12RB1 IL13RA1 IL18R1 IL2RB IQGAP2 KLRB1 KLRF1 LAX1 LCK LCP2 LGALS1 LILRB4 LY6E MAPK10 NOTCH1 NR3C2 NR4A1 NTF3 PTCH1 PTPN22 PTPN6 PTPRJ RGMB RTKN S100A6 SERPINB9 SH3BP2 SH3BP5 SKAP1 SOCS3 SRC TGFBR1 TLE1 TLR4 TNFRSF13B TNFSF9 TP73 TYROBP
IMMUNE_SYSTEM_PROCESS		0.0267332	BNIP3 CEBPB IL4R	CCR6 CD4 CD97 CTSC FYN GPR65 HDAC9 IFITM2 ITGB2 LAX1 LCK LCP2 NFIL3 PDCD1 PREX1 SKAP1 TLR4
DEPHOSPHORYLATION		0.0384275	DUSP8	DUSP2 DUSP4 PTPN22 PTPN6 PTPN7 PTPRJ PTPRN2
NEGATIVE_REGULATION_OF_BIOLOGICAL_PROCESS		0.0295638	BMP7 BNIP3 CSDA HRK PIM1 SOCS1	ANXA4 ATXN1 BACE2 CD27 CLCF1 HDAC9 HEXIM1 HSPA1B IFITM1 IL2RB KLF11 KLF4 LAX1 LDOC1 NOTCH1 PDCD4 PTCH1 RTKN RUNX2 SERPINB9 SOCS3 SRGN TLE1 TP53I11 VCL ZBTB32
PROTEIN_AMINO_ACID_DEPHOSPHORYLATION		0.0295638	DUSP8	DUSP2 DUSP4 PTPN22 PTPN6 PTPN7 PTPRJ PTPRN2
ENHANCER ACTIVITY LOSS GENES IN GCB		0.00401435	CLEC4G LRFN3 TFPI2	ADD3 AFF1 ATG4C CAMK1D CAPN14 CLNK CYSLTR1 DSE HMBOX1 MED12L PARP15 RSE6 SSH2 THAP5 TNFSF13

## Sheet: Tab6
Tab 6: Enriched pathways in top upregulated and downregulated genes in Cohort 2 CREBBP mutant FLs compared to CREBBP WT FLs.
Pathway name	BH corrected p value of c2.Crebbp.up.gene	BH corrected p value of c2.Crebbp.down.gene	Overlapping genes in c2.Crebbp.up.gene	Overlapping genes in c2.Crebbp.down.gene
CD40_upregulated_Burkitt_lymphoma		0.042257	CCL22 ICOSLG LHFPL2	ADAM8 NCF2 RXRA STAT1 TNFSF9
CD8_T_effectorDn_memoryDn_NaiveUp		0.00543859	IFNGR2 USP44	AIF1 FCHO1 PTPN6
Dendritic_cell_CD123pos_blood		0.000733662	BTG3 GPX7 LHFPL2 SEC61A2 SLC1A4 SLC37A1 SLC5A3	ADC AKR1C3 CLIC3 CRIM1 CXCR3 CYTH4 EPHA2 EPS8L2 GAB1 GAS6 ITM2C LILRA4 PLD4 SERPINI1
Dendritic_cell_CD123pos_tonsil		0.00369701	LHFPL2	AKR1C3 EPHA2 EPS8L2 ITM2C
Follicular_lymphoma_Immune_Response1		0.000125354		FAM46A JAM3 TNFRSF1B TNFRSF25 TNFSF12 TTC39B
GCB_gt_ABC_LC		0.037569	MME	LMO2 SAMD12
GC_B_cell_BLhigh_DLBCLlow	0.00103734		AFF2 CYP39A1 MME PEG10 PRDM15	ACY3 LHFP
GC_B_cell_BLlow_DLBCLhigh		0.00309227		CLIC5 DHRS9 GDPD5 LMO2 LOXL2
GC_B_cell_U133Plus	0.0342296	0.0379171	AFF2 CYP39A1 DF5 IGF2BP3 KCNK12 LHFPL2 MME PEG10 PRDM15	ACY3 AIF1 CLIC5 DHRS9 FOLR2 GDPD5 KLHL29 LHFP LMO2 LOXL2
GC_T_helper_up2x_Chtanova		0.0180817	LHFPL2 MSI2 NFATC1 PEG10 PFKFB3 RGS2 SGCE TRIB2	AKR1C3 FAM46A GFOD1 ITGB2 KIAA0182 LDOC1L LHFP NUDT7 RGS3 SPECC1 TPP1 TRPS1 ZFPM1
Hematopoietic_Node1658		0.000916632	PTPRC	LAIR1 LCP2 PLAC8 PTPN6 SELL SELPLG UBA7
IFN_PMBC_2x_Up		2.0456e-05		APOL1 GBP1 GBP2 IFI44 IFI44L IL15 JAK2 LY6E SAMHD1 STAT1 UBA7
IFN_PMBC_4x_Up		0.000827297		APOL1 GBP1 IFI44 IFI44L JAK2 LY6E STAT1
IRF3_target_gene		0.00789029	G13	CRIM1 GBP2 GBP4 IL15 SAMHD1 STAT1 TBC1D9 UBA7
KLF2_induced		0.00314537	PRKCB PTPRC TPST2 TRIB2	CXCR3 DOK2 LY6E NBEAL2 RGS14 S100A4 SLC12A7
Lymph_node_DLBCL		1.39874e-06	GLUL	AIF1 CD68 CSF1 DPYD GBP1 IL13RA1 ITGB2 LAIR1 LCP2 STAT1 TIMP1 TIMP2 TPP1
MCL_gt_SLL_DLBCL	0.0338065		CD24 FCRL2 GNG11
Monocyte_4x_U133plus		0.0311991	DF5 ELOVL7 TDRD6	CD68 CPVL DGAT2 IL13RA1 NCF2 P2RX7 SIRPB1 TFEC TIMP2
Myeloid_Node1536		0.000916632		AIF1 ITGB2 NCF2 RSE6
Myeloma_MF_subgroup_up		0.00292919		ARHGAP6 DFNB31 ITGB7 LCP2 RSE6
Myeloma_MS_subgroup_down		0.0150728		APOL1 OAS3 RHOBTB3 TMEM133
Myeloma_MS_subgroup_up		0.00271423		DSEL JAM3 LRP12 VWA5A WWC2
PAX5_repressed		0.0108711	EMB	FLT3 GRAP2 LMO2 RNF130 TNNI2
PMBL_HL_high		2.09989e-07		CSF1 GBP1 IL13RA1 IL15 JAK2 LY6E MAL OAS3 STAT1 TIMP1
Quiescence_heme_all		0.00534644	KIAA0226 PRKCB PTPRC	ADAM8 CSGALCT1 CYTH4 DOK2 LAIR1 PREX1 PTPN6 SAMHD1 SELL SELPLG SH3BP2
Quiescence_heme_cluster1		4.30326e-05	KIAA0226 PRKCB PTPRC	ADAM8 CSGALCT1 CYTH4 DOK2 LAIR1 PREX1 PTPN6 SAMHD1 SELL SELPLG SH3BP2
Resting_dendritic_cell_GNF		0.00789029		EPHA2 FLT3 GAS6 ITM2C LGMN LILRA4
Resting_monocyte_GNF		0.0138877		AIF1 DPYD NCF2 RAB20 RAB31 SIRPB1 TIMP1 TIMP2
Resting_panT_cell_CD4+CD8+_GNF		0.0179353		CD6 RARG SCML1 TCF7 TNFRSF25
Serum_response_Fb_up	0.0342296	0.0241788	ARMCX3 FAM171B HGST MBP MRPS6 NCOA3 PTPRU	ACSS2 ARSD CSF1 ERRFI1 KIT PARP14 RARRES3 TIMP2
Tcell_PIrep_CalciumDefPtup4x_Feske_Fig6		0.0173564		IFI44L ITGAM ITGB2 ITGB7
Tcell_cytokine_induced_PMBConly_Iinduced		0.0112701		LCP2 PARP14 STAT1 TNFRSF1B
Tcell_cytokine_repressed		0.00107031	TRIB2	CYTH4 ITGB7 LGMN SELL TCF7
Thymic_SP_CD4+Tcell_gt_Blood_CD4+Tcell		0.0345681	IGF2BP3	IFI44L PTPRK RHOBTB3 RSE6 SCN3A
Thymic_SP_CD4+Tcell_gt_Thymic_DP_Tcell		4.06619e-06	TUBA4A	GBP1 GBP2 IFI44 IFI44L SAMHD1 SCML1 SCN3A SELL STAT1 TNFRSF1B TNFRSF25
Thymic_progenitor_Tcell_gt_Thymic_DP_Tcell		2.41858e-05		GUCY1A3 IFI44 IFI44L PLAC8 SCN3A SELL
EZH2_target_ChIP		0.00096885	BMP3 CA3 CITED1 CYP39A1 DAB2IP DF5 DPF3 GNG11 HRK LOC554223 PEG10 SEMA6A SLC25A27 SOX9 TFPI2 TMEM22 TRIM36	ACSS2 ARHGAP10 CCND1 CD300A CNN3 CPVL CSF1 DFNB31 DSEL DSP EPB41L4A FAM46A FLT1 FLT3 GAB1 GDPD5 GUCY1A3 IL13RA1 KIT LGMN LHFP LRP12 LRRC33 LY6E NT5E PELI2 PLAC8 PLXDC1 PPARGC1B PRICKLE1 PTPRK RASL11B RHOBTB3 SCIN SLC37A2 SPA17 SPON1 TBC1D9 TCF7 TMEM220 TNFRSF13B TRPS1 UACA WNT16 ZFYVE28
denovobivGenes		1.74623e-13	ACER2 CA13 ELOVL7 GLUL HECTD2 HRK JDP2 MBP PFKFB3 PPARA RSPH1 SORBS1 TM2D2	ANXA4 ARHGAP18 BHLHE41 CERS6 CHST12 DGAT2 DPYD ETHE1 FAM190A FAM46A GAB1 GDPD5 GPHN GPR132 HELB IL15 KHDRBS2 KIAA0182 KLHL29 MOB3B MYO15B PELI2 PIK3R5 PPARGC1B PREX1 PRICKLE1 PRR5 RAB20 RARG RNF130 RXRA SAMD12 SCML1 SH3RF1 SLC12A6 SLCO4A1 SPG20 STARD9 TBC1D9 TMEM220 TNFRSF1B TSEN54 TTC39B TTC39C ZNF618
NB_GCB_Progression_All_Genes_RPKM_enhancer_loss_minus3_minus4		3.88903e-09	DPF3 FCRL2 PION PRKCB	ABCB1 CSF1 DPYD FLT3 GAB1 GRAP2 IL13RA1 KHDRBS2 MAP3K5 NETO1 NOD1 NT5E PIK3R5 POU5F1B PTPRK RIN3 SDK2 SELL SELPLG SLC12A6 SLC38A11 SPON1 TMEM140 TRPM2 TTC39B ZBTB16
NB_GCB_Progression_All_Genes_RPKM_minus2		3.57816e-11	B3GNT7 CNIH2 DLEU2 DPF3 IFNGR2 LHFPL2 MIR29B2 NCOA3 SAMD4B STARD5 TMEM165 UMODL1	ABCB1 AKAP6 ARHGAP18 CAC1I CIITA CRIM1 CSF1 DOK2 DSEL FLT1 FLT3 GBP5 GPR132 IFI44L ITGB2 JAK2 KIAA0125 LAIR1 LGMN MICAL1 CC2 NCF2 NOD1 PARP14 PELI2 PLAC8 PLCH2 PLXDC1 PTPRK RAB31 RAP1GAP2 RHOBTB3 SCIN SCN3A SEMA3D SERPINI1 SKAP1 SLAMF7 SLC12A7 ST6GALC3 SYN3 TIMP2 TMEM133 TNFRSF13B TNFSF12 TRIM69 TRPM2 TTC39B ZFPM1
NB_GCB_Progression_All_Genes_RPKM_minus5		3.26919e-09	FCRL2 MBP	CD6 CYTH4 DPYD GAB1 GRAP2 IL13RA1 KCNQ1 MAP3K5 NT5E PIK3R5 RXRA SDK2 SELPLG SLC12A6 SLC38A11 SPON1 TLE1 TMEM140 TNFRSF1B TRPS1 UACA
NB_GCB_Progression_All_Genes_RPKM_minus10		0.00625463	MSI2 PRKCB PTPRC	CSGALCT1 KHDRBS2 NETO1 RIN3 SELL ZBTB16
NB_GCB_Progression_All_Genes_RPKM_minus2.to.plus2		0.00827997	ACER2 ADCY10 APPBP2 BMP3 BTG3 CA13 CCL22 CDKL4 DAB2IP DF5 DNMT3L EMB EPHX3 G13 GNB5 GNG11 GPX7 HGST HRK ICA1L MKNK2 MRPS6 MYO5C NFATC1 NHLH1 NLGN3 PHTF1 PION PPARA PTPRU SAA2 SEMA6A SGCE SLC25A27 SPAG1 TMEM44 TMEM62 TNFSF15 TPST2 USP44 ZNF860	ADAM8 ADC ADRB2 AKR1C3 ANXA4 APOL6 ARHGAP17 ATP2B4 BHLHE41 CCL25 CD200R1 CD22 CD300A CHST12 CLIC3 CLIC5 CXCR3 DFNB31 DGAT2 DSP EPB41L4A EPHA2 ETHE1 FOLR2 GAS6 GBGT1 GBP1 GBP4 GRID2IP GYPE HELB IFFO2 IL15 ITGAM ITGB7 ITM2C JAM3 KCNG1 KIAA0182 KIAA2022 KLF4 KLHL29 KLHL32 LCP2 LDOC1L LY6E MEGF6 MGC23284 NEXN NUDT7 P2RX7 PAIP2B PEBP4 POU5F1B PPARGC1B PREX1 PRICKLE1 PTPN6 RAD51AP2 RNF130 SAMD12 SERPIN…
GCB_BCL6SMRT_Distal_Enhancer		0.000809652	CCL22 DLEU2 ID2 NCOA3 NRSN2 RSPH1 SLC1A4	ADRB2 ANXA4 CLIC5 CSGALCT1 DHRS9 EPHA4 FGD2 FLT1 GFOD1 IL13RA1 KIAA0125 LMO2 POU5F1B SH3BP2 SLC12A7 TBC1D9 TNFRSF13B TRIM69 UACA
GCB_bivalentProm_genes	0.00598781	3.45357e-18	ACER2 BMP3 CA13 CERCAM CHR5 CYP39A1 DF5 DLEU2 DPF3 ELOVL7 GLUL HECTD2 HRK ISM2 JDP2 KIAA0895 MBP MYO5C PEG10 PFKFB3 PHGDH PPARA PTPRU RSPH1 SGCE SHROOM1 SLC25A27 SORBS1 TM2D2 TMEM22 TRIM36 USP44	ADC ANXA4 ARHGAP10 ARHGAP18 BHLHE41 CCND1 CERS6 CHST12 CRY1 DFNB31 DGAT2 DPYD EPB41L4A EPHA4 ERRFI1 ETHE1 EXPH5 FAM190A FAM46A FLJ35946 FLT3 FMNL2 GAB1 GDPD5 GPHN GPR132 HELB IFFO2 IL15 IRF6 KHDRBS2 KIAA0182 KLF4 KLHL29 KLHL32 LHFP LRRC49 MOB3B MYO15B NEXN OSBPL1A PELI2 PIK3R5 PPARGC1B PPM1L PREX1 PRICKLE1 PRR5 RAB20 RARG RASL11B RHOBTB3 RNF130 RXRA SAMD12 SCML1 SERPINB6 SH3RF1 SLC12A6 SLCO4A1 SP…
GC_termDiff_Genes		1.71459e-21	CERCAM LTBP1	APOL6 ARHGAP18 ATP2B4 BHLHE41 CAC1I CCL25 CD6 CERS6 CHST12 CRIM1 CRY1 CSF1 CSGALCT1 CXCR3 DFNB31 DOK2 DPYD ETHE1 FAM46A FLT1 GAB1 GAS6 GBP2 GBP5 GRAP2 HAVCR2 IFFO2 IFI44 ITM2C KRT18 LAIR1 LCP2 LDOC1L LGMN LOC643733 LRP12 LRRC33 LY6E MAL MAP3K5 MEGF6 CC2 P2RX7 PIK3R5 PLAC8 PLXDC1 PRR5 RARG RARRES3 RIN3 S100A4 SELL SELPLG SH2D2A SKAP1 SLAMF7 SPATA13 SPTLC3 SSBP3 ST6GALC3 STAT1 TCF7 TIMP1 TIMP2 TNFR…
Ly1_BCL6RD2mut_upreg	0.0407552	1.07426e-05	ATG9B DDAH2 DLEU2 FAM171B GATSL3 GLUL GPX7 HRK ICA1L IQCD LOC100127983 LOC728537 LRRC37A4 MIOX MPST MYO5C NPHP3 PHLPP1 PRKCB SEC61A2 SGCE STARD5 TMEM22 TMEM44 TRIM36 VANGL2 ZFAND2A	APOL1 APOL6 ATP2B4 BHLHE41 CD68 CYTH4 ETHE1 FMNL2 GAB1 GBP1 GBP4 GBP5 GPC4 IL13RA1 IL23A ITM2C KLHL29 LAIR1 LRRC33 MOB3B P2RX7 PARP14 PEAK1 PELI2 PIEZO1 PREX1 RARG RTN2 SH3BP2 SH3RF1 SLC12A6 SLC12A7 SPA17 SPEF2 SPNS3 SSBP3 STARD9 TCF7 TESK2 TLE1 TNFRSF13B TRIM69 TRPS1 TTC39B TTC39C UBA7 ZBTB16
Ly1_siBCL6_48h_upreg	0.00558818	1.78512e-11	ATG9B BMP3 CA13 CCDC19 CD24 CNIH2 DDAH2 DLEU2 FAM171B FAM180B GATSL3 GLUL GPX7 HRK ICA1L LOC100127983 MPST MYO5C PHLPP1 PRKCB REM2 RNF215 SGCE SORBS1 TRIM36	ABCB1 ADRB2 AIF1 APOL1 APOL6 ARHGAP42 ATP2B4 BHLHE41 CYTH4 ETHE1 FLT1 GAB1 GBP1 GBP2 GDPD5 GPC4 HELB ITM2C JAM3 LAIR1 LRRC33 MAP3K5 MOB3B NCF2 NOD1 PARP14 PEAK1 PELI2 PPM1L PRICKLE1 RAD51AP2 RARRES3 S100A4 SELPLG SLC12A6 SLC12A7 SPEF2 SPTLC3 SSBP3 STARD9 TCF7 TLE1 TMEM133 TMEM220 TNFRSF13B TNFRSF25 TRIM69 TRPS1 TSPAN6 TTC39C ZBTB16
ly1.promoter.BCL6.SMRT.BCOR.341		0.00331279	DLEU2 ID2 PRDM15	ACY3 APOL6 CD22 CIITA HELB LRRC33 MICAL1 PLD4 PRICKLE1 SELPLG SRBD1 TNFRSF1B TNFSF9
ly1.promoter.BCL6-SMRT.all.451		0.0019208	ABHD3 B3GNT7 DLEU2 FCRL2 ID2 PRDM15 PTPRC	ACY3 APOL6 CD22 CD68 CIITA HELB LRRC33 MICAL1 PLD4 PRICKLE1 RGS3 SELPLG SPTLC3 SRBD1 TNFRSF1B TNFSF9
ly1.enhancer.INTRONIC.BCL6-SMRT.DRE.807	0.0407552	0.0428344	AFF2 HRK IGF2BP3 IQCD KIAA0226 LTBP1 MBP MME MSI2 MYO5C NFATC1 PION PRDM15 PRKCB PTPRC TPST2	ABCB1 ARHGAP10 ARHGAP18 GFOD1 GPC4 ITGB7 MGC23284 NOD1 PRICKLE1 RNF130 SAMD12 SDK2 SERPINI1 SPEF2 STARD9 TLE1 TMEM140 TRPS1 ZBTB16
ly1.enhancer.INTRONIC.DISTAL.BCL6-SMRT.DRE.1275	0.033373		AFF2 AZIN1 EMB FCRL2 HRK ID2 IGF2BP3 IQCD KIAA0226 LTBP1 MBP MME MSI2 MYO5C NCOA3 NFATC1 PION PRDM15 PRKCB PTPRC SLC1A4 TPST2	ABCB1 ADRB2 ARHGAP10 ARHGAP18 BHLHE41 CD22 CIITA GFOD1 GPC4 ITGB7 KHDRBS2 KIAA0125 MGC23284 NOD1 PRICKLE1 RNF130 SAMD12 SDK2 SERPINI1 SPEF2 STARD9 TLE1 TMEM140 TNFSF9 TRPS1 ZBTB16
HSC20_Dick_NatMed1		0.0268887	MSI2 MYO5C	ABCB1 CRIM1 FLT3 GUCY1A3 KIAA0125 KLF4
MEIS1_target_ChIPseq_Ebert_Cell1		0.0019208	DDAH2 G13 IGF2BP3 MBP PRKCB SEMA6A TPST2	ARHGAP17 CERS6 CLIC3 CRIM1 DPYD EPB41L4A EPHA4 GPHN GUCY1A3 MAP3K5 NT5E PELI2 PLXDC1 PTPRK RIN3 SCN3A SPON1 SSBP3
PU.1_target_ChIPseq_Ebert_Cell1		2.09353e-13	AFF2 ARMCX3 AZIN1 CCDC165 DDAH2 FCRL2 GLUL GNB5 HGST HRK KIAA0226 LHFPL2 LTBP1 MBP MYO5C NCOA3 PFKFB3 PHLPP1 PHTF1 PION PRKCB PTPRC RGS2 SARM1 SEMA6A SGCE SLC1A4 SLC37A1 SORBS1 SPAG1 TFPI2 TMEM22 TPST2 ZNF189	ABCB1 ADRB2 AIF1 ARHGAP6 ATP2B4 CD300A CERS6 CIITA CLIC5 CPVL CRIM1 CYTH4 DHRS9 DPYD EPB41L4A EPHA4 FAM46A FGD2 FLT1 FLT3 FMNL2 GAB1 GFOD1 GPHN GUCY1A3 IFI44 IFI44L IL13RA1 INPP5A ITGAM ITGB2 ITGB7 KCNQ1 KHDRBS2 KIF21B KIT KLHL29 LAIR1 LCP2 LGMN LHFP LILRA4 MAL MAP3K5 MICAL1 MYO1F NCF2 NOD1 PELI2 PIK3R5 PLAC8 PLEKHA8P1 PLXDC1 PRR5 PTPN6 PTPRK RAB20 RAB31 RAP1GAP2 RGS14 RHOBTB3 RIN3 RSE6 RNF130 RX…
PU.1_NB_prom		0.00299211	ARL6IP1 AZIN1 CA13 DLEU2 EPHX3 FCRL2 FZR1 GATSL3 HKR1 IFNGR2 IGF2BP3 IRF2BP1 JDP2 KCNMB3 KIAA0895 LPGAT1 MIR659 NCOA3 NGRN PHTF1 PIPOX PPARA PRDM15 PRKCB PTPRC RGS2 SAMD4B SPAG1 TFPI2 TLCD1 TMEM165 TMEM62 TMUB2 TNFSF15 TOR2A TUBA4A VGLL4 ZFAND2A	ACY3 ADRB2 ARHGAP17 BHLHE41 CD22 CD300A CD68 CDHR2 CIITA CRIM1 CXCR3 CYTH4 DHRS9 DPYD FAM190A FGD2 GBGT1 GPR132 GRAP2 HAVCR2 INPP5A ITGAM ITGB2 ITGB7 JAK2 LCP2 LILRA4 LMO2 MICAL1 MYO1F NCF2 OAS3 PARP14 PELI2 PIK3R5 PLD4 PLXDC1 PREX1 PTPN6 RAB31 RGS14 RGS3 RSE6 SAMHD1 SELL SELPLG SERPINI1 SH3BP2 SH3RF1 SIRPB1 SLAMF7 SLC12A6 SLC37A2 SPA17 SPATC1 SPG20 SPTLC3 ST6GALC3 TESK2 TMEM140 TNFSF9 TNNI2 TPP1…
PU.1_NB_enhancer	0.00598781	6.73682e-23	ACER2 AFF2 ARL6IP1 ATG9B AZIN1 CA13 CA3 CCDC19 CCL22 CNIH2 CYP39A1 DAB2IP DF5 DLEU2 DNMT3L DPF3 ELOVL7 EMB EML6 FCRL2 FZR1 GATSL3 G13 GNB5 GPX7 HGST HRK ICOSLG IFNGR2 IGF2BP3 IQCD ISM2 JDP2 KCNK12 KCNMB3 KIAA0226 LHFPL2 LPGAT1 LTBP1 MBP MIR29B2 MME MPST MRPS6 MSI2 MYO5C NCOA3 NEK11 NFATC1 NHLH1 PFKFB3 PHTF1 PION PIPOX PPARA PRDM15 PRKCB PTPRC RGS2 RSPH1 SEMA6A SGCE SLC1A4 SLC37A1 SLC5A3 SPAG1 STA…	ABCB1 ACY3 ADC ADRB2 AKAP6 ANXA4 APOL6 ARHGAP10 ARHGAP17 ARHGAP18 ARHGAP42 ARHGAP6 ATP2B4 BHLHE41 CAC1I CD22 CD300A CDHR2 CHST12 CIITA CLIC3 CPNE5 CPVL CRIM1 CRIP3 CRY1 CSF1 CSGALCT1 CXCR3 CYTH4 DFNB31 DGAT2 DHRS9 DOK2 DPYD DSEL EPHA4 ETHE1 FAM46A FCHO1 FGD2 FLT1 FLT3 FMNL2 GAB1 GBP4 GDPD5 GFOD1 GPHN GPR132 GRAP2 HAVCR2 IFFO2 IFI44L IL13RA1 INPP5A IRF6 ITGAM ITGB2 ITGB7 JAK2 KCNQ1 KHDRBS2 KIAA018…
PU.1_NB_all	0.00598781	2.00421e-17	ACER2 AFF2 ARL6IP1 ATG9B AZIN1 BTG3 CA13 CA3 CCDC19 CCL22 CNIH2 CNTD2 CYP39A1 DAB2IP DF5 DLEU2 DNMT3L DPF3 ELOVL7 EMB EML6 EPHX3 FCRL2 FZR1 GATSL3 G13 GNB5 GPX7 HECTD2 HGST HKR1 HRK ICOSLG IFNGR2 IGF2BP3 IQCD IRF2BP1 ISM2 JDP2 KCNK12 KCNMB3 KIAA0226 KIAA0895 LHFPL2 LPGAT1 LTBP1 MBP MIR29B2 MIR659 MME MPST MRPS6 MSI2 MYO5C NCOA3 NEK11 NFATC1 NGRN NHLH1 PFKFB3 PHTF1 PION PIPOX PPARA PRDM15 PRKCB PT…	ABCB1 ACY3 ADC ADRB2 AKAP6 ANXA4 APOL6 ARHGAP10 ARHGAP17 ARHGAP18 ARHGAP42 ARHGAP6 ATP2B4 BHLHE41 CAC1I CD22 CD300A CD68 CDHR2 CHST12 CIITA CLIC3 CPNE5 CPVL CRIM1 CRIP3 CRY1 CSF1 CSGALCT1 CXCR3 CYTH4 DFNB31 DGAT2 DHRS9 DOK2 DPYD DSEL EPHA4 EPS8L2 ETHE1 FAM190A FAM46A FCHO1 FGD2 FLT1 FLT3 FMNL2 GAB1 GBGT1 GBP4 GDPD5 GFOD1 GPHN GPR132 GRAP2 HAVCR2 IFFO2 IFI44L IL13RA1 INPP5A IRF6 ITGAM ITGB2 ITGB7 …
PU.1_CB_prom		0.0285866	ARL6IP1 CA13 CNTD2 DF5 DLEU2 EPHX3 FZR1 GATSL3 HKR1 HRK IFNGR2 IRF2BP1 JDP2 KCNMB3 KIAA0895 MKNK2 NGRN PHTF1 PIPOX PPARA PRDM15 PRKCB PTPRC RGS2 SAMD4B SOX9 SPAG1 TFPI2 TLCD1 TMEM165 TMEM62 TNFSF15 TOR2A TUBA4A VGLL4 ZFAND2A	ACY3 ADRB2 ARHGAP17 CD22 CD300A CD68 CDHR2 CIITA CLIC5 CXCR3 CYTH4 DHRS9 FGD2 GBGT1 GPR132 HAVCR2 ITGAM ITGB2 ITGB7 JAK2 LCP2 LILRA4 LMO2 LRRC49 MICAL1 NCF2 OAS3 PARP14 PIK3R5 PLD4 PLXDC1 PTPN6 RAB31 RGS14 RGS3 RSE6 SELL SELPLG SERPINI1 SH3BP2 SH3RF1 SIRPB1 SLAMF7 SLC37A2 SPA17 SPATC1 SPTLC3 TESK2 TNFSF9 TNNI2 TPP1 TSEN54 ZBTB32
PU.1_CB_enhancer	0.00155273	1.33348e-14	AFF2 ARL6IP1 ATG9B AZIN1 CA13 CA3 CCDC19 CNTD2 CYP39A1 DAB2IP DF5 DLEU2 DNMT3L DPF3 EML6 FCRL2 FZR1 GATSL3 G13 GNB5 GPX7 HGST HRK ICOSLG IFNGR2 IGF2BP3 IQCD ISM2 JDP2 KCNK12 KCNMB3 KIAA0226 LHFPL2 LTBP1 MBP MIR29B2 MKNK2 MME MPST MRPS6 MSI2 MYO5C NCOA3 NEK11 NFATC1 NHLH1 PFKFB3 PHLPP1 PHTF1 PION PIPOX PPARA PRDM15 PRKCB PTPRC RGS2 RSPH1 SGCE SLC1A4 SLC37A1 SLC5A3 SOX9 SPAG1 STARD5 TCP10L TMEM44 T…	ABCB1 ACY3 ADC ADRB2 AKAP6 ANXA4 APOL6 ARHGAP10 ARHGAP17 ARHGAP18 ARHGAP42 ARHGAP6 ATP2B4 BHLHE41 CAC1I CD22 CD300A CDHR2 CIITA CLIC3 CLIC5 CPNE5 CPVL CRIP3 CRY1 CSF1 CSGALCT1 CYTH4 DFNB31 DGAT2 DHRS9 DOK2 EPHA4 FCHO1 FGD2 FLT1 FLT3 FMNL2 GAB1 GBGT1 GDPD5 GFOD1 GPHN GPR132 GRAP2 HAVCR2 IFI44L IL13RA1 INPP5A ITGAM ITGB2 ITGB7 JAK2 KCNQ1 KHDRBS2 KIAA0182 KIAA2022 KIF21B KIT KLHL32 KRT18 LAIR1 LCP2 …
PU.1_CB_all	0.00558818	2.06606e-11	AFF2 ARL6IP1 ATG9B AZIN1 CA13 CA3 CCDC19 CNTD2 CYP39A1 DAB2IP DF5 DLEU2 DNMT3L DPF3 EML6 EPHX3 FCRL2 FZR1 GATSL3 G13 GNB5 GPX7 HECTD2 HGST HKR1 HRK ICOSLG IFNGR2 IGF2BP3 IQCD IRF2BP1 ISM2 JDP2 KCNK12 KCNMB3 KIAA0226 KIAA0895 LHFPL2 LTBP1 MBP MIR29B2 MKNK2 MME MPST MRPS6 MSI2 MYO5C NCOA3 NEK11 NFATC1 NGRN NHLH1 PFKFB3 PHLPP1 PHTF1 PION PIPOX PPARA PRDM15 PRKCB PTPRC REM2 RGS2 RSPH1 SAMD4B SGCE SLC…	ABCB1 ACY3 ADC ADRB2 AKAP6 ANXA4 APOL6 ARHGAP10 ARHGAP17 ARHGAP18 ARHGAP42 ARHGAP6 ATP2B4 BHLHE41 CAC1I CD22 CD300A CD68 CDHR2 CIITA CLIC3 CLIC5 CPNE5 CPVL CRIP3 CRY1 CSF1 CSGALCT1 CXCR3 CYTH4 DFNB31 DGAT2 DHRS9 DOK2 EPHA4 EPS8L2 FCHO1 FGD2 FLT1 FLT3 FMNL2 GAB1 GBGT1 GDPD5 GFOD1 GPHN GPR132 GRAP2 HAVCR2 IFI44L IL13RA1 INPP5A ITGAM ITGB2 ITGB7 ITM2C JAK2 KCNQ1 KHDRBS2 KIAA0182 KIAA2022 KIF21B KIT …
IKZF1_CB_enhancer		0.0216297	DLEU2 ICOSLG MSI2 PFKFB3 PRDM15 PRKCB RSPH1 SPAG1	ACY3 CYTH4 DBNDD1 GBGT1 MICAL1 PTPN6 RAP1GAP2 RGS3 RIN3 RXRA SH3BP2 STAT1 TNFSF9
CTCF_NB_enhancer		6.00402e-10	ACER2 ADCY10 AFF2 AZIN1 B3GNT7 BMP3 CA13 CA3 CCDC19 CDKL4 DAB2IP DF5 DLEU2 DJC27 DPF3 EMB EML6 FCRL2 GATSL3 GNB5 HKR1 ICA1L IKZF4 IQCD JDP2 KIAA0895 KISS1R LHFPL2 LTBP1 MBP MPST MSI2 MYO5C NCOA3 NEK11 NGRN NHLH1 NLGN3 PFKFB3 PHLPP1 PION PRDM15 PRKCB RNF215 SAA2 SEC61A2 SHROOM1 SLC1A4 SLC37A1 SORBS1 SPAG1 TCP10L TMEM165 TMEM44 TMEM67 TOR2A TRIM36 UBTD2 UMODL1 USP44 YIPF6 ZFAND2A ZNF643 ZNF860	ABCB1 ACY3 ADC AKAP6 ANXA4 ARHGAP10 ARHGAP17 ARHGAP18 ARHGAP42 ARHGAP6 ATP2B4 CAC1I CCDC144C CCND1 CD200R1 CD300A CDHR2 CHST12 CIITA CLIC5 CPNE5 CPVL CRIM1 CRY1 CSGALCT1 CXCR3 CYTH4 DFNB31 DHRS9 DOK2 DPYD DSEL EPB41L4A EPS8L2 ERRFI1 ETHE1 FAM190A FCHO1 FGD2 FLT1 FLT3 FMNL2 GAB1 GAS6 GBGT1 GBP1 GDPD5 GFOD1 GPC4 GPHN GPR132 GRID2IP GYPE IFFO2 IFI44 IFI44L IL13RA1 INPP5A ITGAM ITGB2 ITM2C JAK2 JAM3 …
CTCF_NB_all		1.91887e-11	ABHD3 ACER2 ADCY10 AFF2 ARL6IP1 ASB6 ATG9B AZIN1 B3GNT7 BMP3 CA13 CA3 CCDC19 CDKL4 CERCAM CNIH2 CNTD2 DAB2IP DF5 DLEU2 DJC27 DNLZ DPF3 EMB EML6 FCRL2 GATSL3 GNB5 HKR1 ICA1L IKZF4 IQCD IRF2BP1 JDP2 KCNK12 KIAA0895 KISS1R LHFPL2 LTBP1 MBP MPST MSI2 MYO5C NCOA3 NEK11 NFATC1 NGRN NHLH1 NLGN3 NRSN2 PFKFB3 PHGDH PHLPP1 PION PRDM15 PRKCB PTPRU RNF215 SAA2 SAMD4B SEC61A2 SEMA6A SHROOM1 SLC14A1 SLC1A4 SLC…	ABCB1 ACY3 ADC AKAP6 ANXA4 ARHGAP10 ARHGAP17 ARHGAP18 ARHGAP42 ARHGAP6 ATP2B4 BHLHE41 CAC1I CCDC144C CCND1 CD200R1 CD300A CD6 CDHR2 CHST12 CIITA CLIC5 CPNE5 CPVL CRIM1 CRIP3 CRY1 CSGALCT1 CXCR3 CYTH4 DBNDD1 DFNB31 DHRS9 DOK2 DPYD DSEL EPB41L4A EPHA4 EPS8L2 ERRFI1 ETHE1 FAM190A FAM46A FCHO1 FGD2 FLT1 FLT3 FMNL2 GAB1 GAS6 GBGT1 GBP1 GDPD5 GFOD1 GPC4 GPHN GPR132 GRID2IP GYPE IFFO2 IFI44 IFI44L IL13R…
CTCF_CB_enhancer		1.13931e-07	ACER2 ADCY10 AFF2 AZIN1 B3GNT7 BMP3 BTG3 CA13 CCDC19 CDKL4 CNIH2 DAB2IP DF5 DLEU2 DPF3 EML6 FCRL2 GATSL3 GNB5 HRK ICA1L ID2 IGF2BP3 IKZF4 IQCD JDP2 KIAA0895 LTBP1 MBP MPST MRPS6 MSI2 MYO5C NCOA3 NEK11 NGRN NHLH1 NLGN3 PFKFB3 PHLPP1 PION PRDM15 PRKCB PTPRC PTPRU RGS2 RNF215 SAA2 SEC61A2 SHROOM1 SLC37A1 SORBS1 SOX9 SPAG1 TCP10L TMEM44 TMEM67 TOR2A TRIM36 UBTD2 UMODL1 USP44 YIPF6 ZFAND2A ZNF643 ZNF8…	ABCB1 ACY3 ADC ADRB2 AKAP6 ANXA4 ARHGAP10 ARHGAP17 ARHGAP18 ARHGAP42 ARHGAP6 ATP2B4 CAC1I CCDC144C CCND1 CD200R1 CD300A CDHR2 CHST12 CIITA CLIC5 CPNE5 CPVL CRIM1 CRY1 CSF1 CSGALCT1 CXCR3 CYTH4 DFNB31 DHRS9 DOK2 DPYD EPB41L4A EPS8L2 ERRFI1 ETHE1 FAM190A FCHO1 FGD2 FLT1 FLT3 FMNL2 GAB1 GAS6 GBGT1 GBP1 GDPD5 GFOD1 GPHN GPR132 GRAP2 GRID2IP HIST3H2BB IFFO2 IFI44 IFI44L IL13RA1 INPP5A ITGB2 ITM2C JAK2…
CTCF_CB_all		6.94432e-10	ACER2 ADCY10 AFF2 ARL6IP1 ASB6 ATG9B AZIN1 B3GNT7 BMP3 BTG3 CA13 CCDC19 CDKL4 CERCAM CNIH2 CNTD2 DAB2IP DF5 DLEU2 DNLZ DPF3 EML6 FCRL2 GATSL3 GNB5 HRK ICA1L ID2 IGF2BP3 IKZF4 IQCD IRF2BP1 JDP2 KIAA0895 KISS1R LTBP1 MBP MPST MRPS6 MSI2 MYO5C NCOA3 NEK11 NFATC1 NGRN NHLH1 NLGN3 NRSN2 PCDHB9 PEG10 PFKFB3 PHGDH PHLPP1 PION PRDM15 PRKCB PTPRC PTPRU RGS2 RNF215 SAA2 SAMD4B SEC61A2 SEMA6A SGCE SHROOM1 S…	ABCB1 ACSS2 ACY3 ADC ADRB2 AKAP6 ANXA4 ARHGAP10 ARHGAP17 ARHGAP18 ARHGAP42 ARHGAP6 ATP2B4 CAC1I CCDC144C CCND1 CD200R1 CD300A CD6 CDHR2 CHST12 CIITA CLIC5 CPNE5 CPVL CRIM1 CRIP3 CRY1 CSF1 CSGALCT1 CXCR3 CYTH4 DBNDD1 DFNB31 DHRS9 DOK2 DPYD EPB41L4A EPHA4 EPS8L2 ERRFI1 ETHE1 FAM190A FAM46A FCHO1 FGD2 FLT1 FLT3 FMNL2 GAB1 GAS6 GBGT1 GBP1 GDPD5 GFOD1 GPHN GPR132 GRAP2 GRID2IP HIST3H2A HIST3H2BB IFFO2…
CTCF_ly1_prom	0.000413474		ABHD3 ARL6IP1 ASB6 AZIN1 B3GNT7 CA13 CCNI2 CD24 CDKL4 CELF3 CERCAM CNTD2 DAB2IP DNLZ ELOVL7 EMB EML6 EPHX3 FAM131A FYTTD1 GATSL3 GNG11 HECTD2 HGST HRK ICA1L ICOSLG JDP2 KCNK12 KIAA0226 KIAA0895 KISS1R LHFPL2 LPGAT1 LTBP1 MKNK2 MME MRPS6 NCOA3 NFATC1 PCDHB14 PCDHB9 PEG10 PFKFB3 PHLPP1 PION PRKCB PSMG3 PTPRU RGS2 RNF215 RSPH1 SAMD4B SEC61A2 SEMA6A SGCE SHROOM1 SLC14A1 SLC1A4 SLC5A3 SPAG1 TFPI2 TLCD…	ACSS2 AKR1C3 ARHGAP42 ATP2B4 BHLHE41 CD22 CD6 CDHR2 CIITA CPNE5 CRIP3 CRY1 DBNDD1 DFNB31 DGAT2 DOK2 EPB41L4A EPHA4 GDPD5 GFOD1 GPR132 HIST3H2A ITM2C JAK2 KIAA0182 MAP3K5 MAPK13 MICAL1 MYO15B MYO1F NUDT7 OAS3 PARP14 PLAC8 PLXDC1 PPARGC1B PRICKLE1 PRR5 PTPN6 RARG RGS3 RTN2 SCN3A SELL SELPLG SPG20 SRBD1 TMEM140 TMTC2 TNFAIP8L2 TNFRSF25 TNNI2 TRPS1 TSEN54 TSPAN6 TTC39B ZNF618
CTCF_ly1_enhancer		1.61645e-08	ABHD3 ACER2 ADCY10 AFF2 ATG9B AZIN1 B3GNT7 BMP3 BTG3 CA13 CA3 CCDC19 CDKL4 CERCAM CHR5 CITED1 CNIH2 CNTD2 CYP39A1 DAB2IP DF5 DLEU2 DJC27 DNMT3L DPF3 EMB EML6 EPHX3 FAM171B FCRL2 FYTTD1 GATSL3 G13 GNB5 HKR1 HRK ICA1L ICOSLG ID2 IFNGR2 IGF2BP3 IKZF4 IQCD JDP2 KCNK12 KCNMB3 KIAA0226 KIAA0895 KIAA1024 KIAA1586 KISS1R LHFPL2 LTBP1 MBP MKNK2 MME MPST MRPS6 MSI2 MYO5C NCOA3 NEK11 NFATC1 NGRN NHLH1 NLGN3…	ABCB1 ACY3 ADC ADRB2 AKAP6 AKR1C3 ANXA4 APOL6 ARHGAP10 ARHGAP17 ARHGAP18 ARHGAP42 ARHGAP6 ATP2B4 BHLHE41 CAC1I CCND1 CD200R1 CD300A CD6 CDHR2 CHST12 CIITA CLIC5 CPNE5 CPVL CRIM1 CRY1 CSF1 CSGALCT1 CXCR3 CYTH4 DFNB31 DGAT2 DHRS9 DNMT1 DOK2 DPYD DSEL EPB41L4A EPS8L2 ERRFI1 ETHE1 EXPH5 FAM190A FAM46A FCHO1 FGD2 FLT1 FLT3 FMNL2 GAB1 GAS6 GBGT1 GDPD5 GFOD1 GPC4 GPHN GPR132 GRAP2 GRID2IP GYPE HELB HIST…
CTCF_ly1_all		9.4308e-08	ABHD3 ACER2 ADCY10 AFF2 ARL6IP1 ASB6 ATG9B AZIN1 B3GNT7 BMP3 BTG3 CA13 CA3 CCDC19 CCNI2 CD24 CDKL4 CELF3 CERCAM CHR5 CITED1 CNIH2 CNTD2 CYP39A1 DAB2IP DF5 DLEU2 DJC27 DNLZ DNMT3L DPF3 ELOVL7 EMB EML6 EPHX3 FAM131A FAM171B FCRL2 FYTTD1 GATSL3 G13 GNB5 GNG11 HECTD2 HGST HKR1 HRK ICA1L ICOSLG ID2 IFNGR2 IGF2BP3 IKZF4 IQCD IRF2BP1 JDP2 KCNK12 KCNMB3 KIAA0226 KIAA0895 KIAA1024 KIAA1586 KISS1R LHFPL2 L…	ABCB1 ACSS2 ACY3 ADC ADRB2 AKAP6 AKR1C3 ANXA4 APOL6 ARHGAP10 ARHGAP17 ARHGAP18 ARHGAP42 ARHGAP6 ATP2B4 BHLHE41 CAC1I CCND1 CD200R1 CD22 CD300A CD6 CDHR2 CHST12 CIITA CLIC5 CPNE5 CPVL CRIM1 CRIP3 CRY1 CSF1 CSGALCT1 CXCR3 CYTH4 DBNDD1 DFNB31 DGAT2 DHRS9 DNMT1 DOK2 DPYD DSEL EPB41L4A EPHA4 EPS8L2 ERRFI1 ETHE1 EXPH5 FAM190A FAM46A FCHO1 FGD2 FLT1 FLT3 FMNL2 GAB1 GAS6 GBGT1 GDPD5 GFOD1 GPC4 GPHN GPR13…
P300_ly1_enhancer	2.97993e-05	0.000459181	BMP3 CNIH2 DLEU2 DNMT3L FCRL2 FZR1 GNB5 HRK ICOSLG ID2 IFNGR2 IGF2BP3 IQCD JDP2 MBP MIR29B2 MME MSI2 MYO5C NCOA3 NFATC1 PRDM15 PTPRC RSPH1 SLC1A4 SLC37A1 TMEM44 UMODL1	ACY3 ADC APOL1 ARHGAP10 ARHGAP6 BHLHE41 CD22 CIITA CPNE5 CYTH4 FCHO1 FGD2 GBGT1 GFOD1 GPC4 GPR132 PELI2 PLAC8 PLD4 PTPN6 RAP1GAP2 RGS3 SAMD12 SPEF2 STARD9 STAT1 TLE1 TNFSF9 TRIM69 TRPS1 ZBTB16
P300_ly1_all	0.00598781	2.00421e-17	ACER2 AFF2 ARL6IP1 ATG9B AZIN1 BTG3 CA13 CA3 CCDC19 CCL22 CNIH2 CNTD2 CYP39A1 DAB2IP DF5 DLEU2 DNMT3L DPF3 ELOVL7 EMB EML6 EPHX3 FCRL2 FZR1 GATSL3 G13 GNB5 GPX7 HECTD2 HGST HKR1 HRK ICOSLG IFNGR2 IGF2BP3 IQCD IRF2BP1 ISM2 JDP2 KCNK12 KCNMB3 KIAA0226 KIAA0895 LHFPL2 LPGAT1 LTBP1 MBP MIR29B2 MIR659 MME MPST MRPS6 MSI2 MYO5C NCOA3 NEK11 NFATC1 NGRN NHLH1 PFKFB3 PHTF1 PION PIPOX PPARA PRDM15 PRKCB PT…	ABCB1 ACY3 ADC ADRB2 AKAP6 ANXA4 APOL6 ARHGAP10 ARHGAP17 ARHGAP18 ARHGAP42 ARHGAP6 ATP2B4 BHLHE41 CAC1I CD22 CD300A CD68 CDHR2 CHST12 CIITA CLIC3 CPNE5 CPVL CRIM1 CRIP3 CRY1 CSF1 CSGALCT1 CXCR3 CYTH4 DFNB31 DGAT2 DHRS9 DOK2 DPYD DSEL EPHA4 EPS8L2 ETHE1 FAM190A FAM46A FCHO1 FGD2 FLT1 FLT3 FMNL2 GAB1 GBGT1 GBP4 GDPD5 GFOD1 GPHN GPR132 GRAP2 HAVCR2 IFFO2 IFI44L IL13RA1 INPP5A IRF6 ITGAM ITGB2 ITGB7 …
crebbp.ly7.enhancer		2.94773e-11		ACY3 ADC ADRB2 ANXA4 APOL1 APOL6 ARHGAP10 ARHGAP17 ARHGAP18 ARHGAP42 ARHGAP6 ARRDC5 ATP2B4 BHLHE41 CD200R1 CD22 CD300A CDHR2 CHST12 CIITA CPNE5 CRIM1 CSGALNACT1 CXCR3 CYTH4 DBNDD1 DFNB31 DGAT2 DHRS9 DNMT1 DPYD EPHA4 EPS8L2 FCHO1 FGD2 FLT1 GAB1 GDPD5 GFOD1 GRAP2 GRID2IP HIST3H2BB IL23A INPP5A ITGB2 ITGB7 ITM2C JAK2 KCNG1 KCNQ1 KHDRBS2 KIAA0182 KIF21B KLHL29 KLHL32 LAIR1 LDOC1L LGMN LHFP LMO2 LRRC3…
Tcell_down_Ebert_cell1		8.27855e-10	CCDC165 DDAH2 GLUL GZ GNG11 IGF2BP3 LHFPL2 LTBP1 MPST MYO5C SLC1A4 SORBS1	AIF1 ANXA4 ARHGAP6 CIITA CPVL DHRS9 FAM46A FLT3 GAB1 GFOD1 GUCY1A3 IL13RA1 ITGAM ITM2C JAK2 KHDRBS2 KIAA0125 KIAA0182 KIT KLF4 LHFP LMO2 OSBPL1A PELI2 RAB31 RHOBTB3 RSE6 RNF130 RXRA SCN3A SEMA3D SERPINI1 SPATA6 TBC1D9 TFEC TIMP2
Bcell_down_Ebert_cell1		3.96941e-07	GLUL ID2 ID2B TPST2	AIF1 AKR1C3 ATP2B4 CD300A DNMT1 GBP2 GUCY1A3 LCP2 LRP12 MLF1 OSBPL1A PLXDC1 RGS3 S100A4 SAMHD1 SELPLG SLAMF7 SSBP3 TIMP1
NK_up_Ebert_cell1		1.17815e-05	ID2 TPST2	ABCB1 ADRB2 CD300A CLIC3 GFOD1 ITGB2 LAIR1 RAP1GAP2 RGS3 SLAMF7 ZBTB16
HSC_up_Ebert_cell1		0.014949	DDAH2 GNG11 MYO5C PHGDH PHLPP1 PHTF1 SEMA6A TMEM22 VGLL4 ZNF189	AKR1C3 CERS6 CRIM1 FLT1 FLT3 GUCY1A3 ITM2C KIAA0125 KIT LHFP LRP12 OSBPL1A PLEKHA8P1 RHOBTB3 SCN3A SERPINB6 SPG20 SRBD1 TBC1D8B TFEC TMEM220 VWA5A
HSC_down_Ebert_cell1		0.0340527	TRIB2	DOK2 IL23A ITGB7 SAMHD1
HSC_e-ERY_down_Ebert_cell1		4.14314e-07	ID2 ID2B KIAA0226 MBP MKNK2 PION TMUB2 TUBA4A	ADRB2 CD6 CXCR3 CYTH4 DOK2 EPHA4 FGD2 GBP1 IL13RA1 IL15 IL23A ITGB2 ITGB7 KCNQ1 MAPK13 NT5E PLXDC1 RAP1GAP2 SAMHD1 SELPLG SKAP1 TBC1D9 TCF7 TLE1 TNFRSF1B TNFSF12
ERY_down_Ebert_cell1		0.00725216	ABHD3 GNB5 HGST IFNGR2 KIAA0226 LPGAT1 LRRC37A4 NCOA3 NFATC1 PFKFB3 PION PRKCB PTPRC RGS2 SARM1 SLC5A3	ABCB1 ADAM8 ANXA4 ARHGAP17 CRIM1 CSGALCT1 CYTH4 DPYD GBP1 GBP2 IFI44 IFI44L IL15 ITGB2 ITGB7 KIF21B LAIR1 LCP2 MICAL1 NOD1 OAS3 PLAC8 PLEKHA8P1 PTPN6 RAP1GAP2 RARRES3 RGS3 RIN3 SAMHD1 SCML1 SELL SKAP1 SPON1 STAT1 TRPS1 UBA7
GMP_up_Ebert_cell1		6.1449e-09	IFNGR2 IGF2BP3 LPGAT1 RGS2 TRIM36	ADRB2 AIF1 ARHGAP17 CD68 CIITA CPVL DHRS9 DOK2 FAM46A FGD2 IL13RA1 ITGAM ITGB2 JAK2 KLF4 LAIR1 LILRA4 MYO1F NCF2 PTPN6 RAB31 RSE6 RNF130 S100A4 SAMHD1 SH3BP2 SIRPB1 TBC1D9 TIMP1 TIMP2 TNFRSF1B TPP1
EZH2_mut_down_347_Ash_FL	0.0205134		CD24 GLUL GZ GNG11 HRK LOC100127983 MME SGCE SLC1A4 USP44	RARRES3
Intron_gain.ATAC.reads_CREBBP.KD		0.0287138	PHLPP1	AKAP6 KHDRBS2 KLHL29 TRPS1 TTC39C
c1.Crebbp.up98	2.93755e-08		BMP3 C6ORF99 DAB2IP EML6 GNG11 HRK IGF2BP3 LTBP1 MIR486 PHGDH SGCE TFPI2 TMEM22 USP44 VANGL2	ARHGAP10
c1.Crebbp.down_397		2.19842e-87	MIR568	ABCB1 ACY3 ADAM8 ANXA4 ARHGAP18 ARSD ATP2B4 BHLHE41 C10ORF128 C12ORF42 C1ORF228 C7ORF50 CD300A CD68 CERS6 CLIC3 CXCR3 DHRS9 DOK2 DPYD FCHO1 FOLR2 GDPD5 GPC4 GYPE HIST3H2A IFFO2 IL13RA1 INPP5A ITGAM ITGB2 ITGB7 ITM2C JAM3 KIAA0125 KIAA0182 KLF4 KLHL29 LAIR1 LCN10 LCP2 LDOC1 LHFP LILRA4 LMO2 LOC100505746 LOC643733 LOXL2 LRRC33 LRRC56 LY6E MGC39372 MYO15B MYO1F NCF2 NT5E PIEZO1 PIK3R5 PLAC8 PLCH2 PL…
c1.Ep300.up_381	0.0339588		C11ORF84 CD24 DNLZ FAM57A GPX7 KCNK12 LTBP1 NRSN2 PCDHB14 TOR2A	CIITA GBP1 NUDT7 SLC38A7
c1.Ep300.down_692		3.64441e-06	ATG9B AZIN1 CYP39A1 PRKCB REM2 RGS2 SLC25A27 STARD5	ACY3 ARHGAP42 C1ORF228 C7ORF50 CERS6 DHRS9 ERRFI1 FCHO1 GPC4 HIST3H2BB JAK2 KIAA0182 KLHL29 LHFP LRRC56 MAP3K5 PEAK1 PLCH2 PLD4 PRICKLE1 RAP1GAP2 RGS14 RIN3 SELL SH3BP2 SIRPB1 SPATC1
c2.Ep300.down_468		6.74516e-75	CCDC19	ABCB1 ACSS2 ADC ARHGAP6 ARRDC5 ARSD CCL25 CNN3 CRIM1 CRY1 CSGALCT1 DFNB31 DGAT2 DSEL EPHA2 ERRFI1 FAM190A FAM46A FLT3 GAB1 GPHN GPR132 IFI44 IFI44L IL13RA1 IL15 IRF6 ITM2C JAM3 KCNG1 KCNQ1 KHDRBS2 KIAA0125 KIAA2022 KIT KLF4 KLHL29 KRT18 LAIR1 LCN10 LDOC1 LGMN LOC100287722 LOC442497 LRRC33 LY6E MEGF6 MGC39372 MLF1 MYO15B MYO1F NETO1 NT5E OSBPL1A PARP14 PIK3R5 PLAC8 PLCH2 POU5F1B PTPRK RAP1GAP2 RAS…
IMMUNE_SYSTEM_PROCESS		0.00836157	CCL22 CD24 ICOSLG MBP PTPRC	CCL25 CD22 CIITA CSF1 GBP2 IL15 ITGB2 LCP2 MAL MLF1 PREX1 SCIN SKAP1 TCF7 ZBTB16
SIGNAL_TRANSDUCTION		0.00401878	CCL22 CD24 DDAH2 GNA13 GNAZ GNG11 IFNGR2 MKNK2 NEK11 NFATC1 PEG10 PTPRC PTPRU RGS2 SORBS1 TNFSF15	ADRB2 ANXA4 CACNA1I CCL25 CLIC3 DOK2 EPHA2 EPHA4 FGD2 FLT3 GAB1 GAS6 GRAP2 GUCY1A3 IL13RA1 IL15 JAK2 KIT LCP2 LY6E MAL MAP3K5 MAPK13 NOD1 P2RX7 PPARGC1B PTPN6 RGS14 RGS3 SH2D2A SH3BP2 SIRPB1 SKAP1 STAT1 TLE1 TNFRSF13B TNFRSF25 TNFSF12 TNFSF9 TSPAN6 WNK3
HSA04060_CYTOKINE_CYTOKINE_RECEPTOR_INTERACTION		0.00836991	CCL22 IFNGR2 TNFSF15	CCL25 CSF1 CXCR3 FLT1 FLT3 IL13RA1 IL15 IL23A KIT TNFRSF13B TNFRSF1B TNFRSF25 TNFSF12 TNFSF9
ENHANCER ACTIVITY LOSS GENES IN GCB		8.06687e-19	DPF3 PTPRC TFPI2	ABCB1 CD6 GAB1 GBP2 IL13RA1 KHDRBS2 LCN10 LGMN LOC643733 MAP3K5 MOB3B NETO1 PAIP2B PARP14 PEAK1 PELI2 PIK3R5 PLAC8 RAB20 RIN3 RSE6 RXRA SCN3A SDK2 SELPLG SLC12A6 ST6GALC3 TIMP2 TLE1 TMEM133 TMEM140 TNFSF12 TTC39B VWA5A WNT16 ZBTB16
HSA04612_ANTIGEN_PROCESSING_AND_PRESENTATION		0.008263		LTA HLA-DMA HLA-DOB RFX5 NFYA CTSB CD8B HLA-DRB1 HLA-DRB5 CTSL1 HLA-DMB HLA-DQB-2 CD74 HLA-DRA CD8A PSME2 HLA-DQB1 HLA-DQA1 HLA-DOA HLA-DPB1 HLA-DPA1 CD4 CIITA LGMN

## Sheet: Tab7
Tab 7: Enriched pathways in top upregulated and downregulated genes in Cohort 3 CREBBP mutant DLBCLs compared to CREBBP WT DLBCLs.
Pathway name	BH corrected p value of c3.Crebbp.up.gene	BH corrected p value of c3.Crebbp.down.gene	Overlapping genes in c3.Crebbp.up.gene	Overlapping genes in c3.Crebbp.down.gene
c1.Crebbp.down_397		2.84751e-34		ADAM8_-0.67 AHK_-0.46 ARID3A_-0.88 C10ORF128_-0.48 C12ORF42_-0.26 CAMK1D_-0.72 CCDC50_-0.63 CCR7_-0.86 CD300A_-0.44 CD44_-0.77 CLEC17A_-1.07 CMAHP_-0.45 CYSLTR1_-0.50 DHRS9_-0.90 DSE1L3_-0.66 DOK7_-0.26 DSE_-0.43 DUSP2_-0.61 ENTPD1_-0.59 FAM26F_-0.69 FAR2_-0.25 FGR_-0.55 GZMB_-0.82 HCST_-0.45 HHAT_-0.22 HIST3H2A_-0.75 IFITM2_-0.51 INPP5A_-0.23 IQGAP2_-0.49 LAX1_-0.50 LOC283070_-0.69 LOC645638_-0.…
GC_termDiff_Genes		5.6869e-27		ADAP1_-0.797 AGMAT_-0.536 AHK_-0.465 AQP3_-0.617 ARHGEF3_-0.523 ARID3A_-0.878 ARID5A_-0.510 BATF_-1.081 BCAN_-0.032 BTN3A2_-0.495 CARD17_-0.172 CASP10_-0.437 CCND2_-0.651 CCR7_-0.863 CD226_-0.398 CD44_-0.766 CHST2_-0.659 CKAP4_-0.583 CREB3L2_-0.562 CXCL13_-0.874 CYSLTR1_-0.504 DCTD_-0.376 DNMT3A_-0.332 ELL2_-0.603 EMR1_-0.418 ETHE1_-0.480 FAIM3_-0.825 FAM172BP_-0.191 FAM46C_-0.752 FAM78B_-0.407 F…
c2.Crebbp.down_295		3.12593e-20		ACSS2_-0.31 ADAM8_-0.67 CD300A_-0.44 CPVL_-0.70 DHRS9_-0.90 ETHE1_-0.48 GBP1_-0.70 GBP2_-0.57 GBP5_-0.67 HIST3H2A_-0.75 INPP5A_-0.23 JAK2_-0.36 KCNQ1_-0.23 KHDRBS2_-0.24 LRRC56_-0.15 NCF2_-0.61 PLAC8_-0.83 PREX1_-0.53 PRR5_-0.42 PTPN6_-0.62 RAB31_-0.51 RGS14_-0.40 RIN3_-0.45 RSE6_-0.72 RXRA_-0.38 S100A4_-0.83 SH2D2A_-0.44 SH3BP2_-0.39 SKAP1_-0.61 SLAMF7_-1.06 SLCO4A1_-0.76 SPECC1_-0.47 ST6GALC3_-…
PU.1_NB_enhancer	1.99927e-24	7.64023e-18	AACS_0.368 ABLIM1_0.563 ACYP2_0.360 AFF2_0.644 ALOX5_0.511 AMZ2P1_0.313 ANKRD13A_0.469 ARHGEF37_0.235 ARID1B_0.289 ARID4A_0.314 ARID4B_0.279 ASAP1_0.410 ASB13_0.864 AUTS2_0.752 B3GALTL_0.247 BACH2_0.598 BAZ2B_0.502 BBX_0.279 BCL11A_0.439 BCL2_0.768 BCL6_0.666 BICD1_0.422 BLK_0.657 BPTF_0.577 BRWD1_0.522 CA13_0.128 CCDC122_0.295 CD1A_0.220 CD22_0.645 CD79A_0.488 CD79B_0.588 CDK14_0.733 CHD6_0.296 …	ACSL1_-0.4615 ADAP1_-0.7970 AHK_-0.4648 ANKRD22_-0.6189 APITD1_-0.3848 APOBEC3B_-0.5810 APOBEC3H_-0.3757 APOC4_-0.1618 ARHGAP31_-0.4227 ARHGEF3_-0.5233 ARID3A_-0.8780 ARID3B_-0.3584 ARID5A_-0.5101 ASL_-0.4540 ASPHD2_-0.3015 ATF3_-0.4257 ATP8B4_-0.1294 BATF_-1.0813 BATF3_-0.7693 BCAN_-0.0324 BCL2A1_-0.8704 BCL2L10_-0.5765 BMP8B_-0.1868 BSPRY_-0.6544 BTBD19_-0.4831 BTN3A2_-0.4946 CAC1D_-0.3020 CAC1…
GMP_up_Ebert_cell_11		2.20327e-15		ACSL1_-0.46 ADAP1_-0.80 BATF3_-0.77 BCL2A1_-0.87 CD244_-0.33 CKAP4_-0.58 CPVL_-0.70 DHRS9_-0.90 DSE_-0.43 EMR1_-0.42 ENTPD1_-0.59 FCGR1A_-0.62 FCGR1B_-0.39 FGL2_-0.55 FGR_-0.55 FOLR3_-0.13 HCK_-0.86 HLA-DRB1_-1.13 IFITM2_-0.51 IL6R_-0.57 IRF5_-0.55 JAK2_-0.36 KIAA0226L_-0.74 LILRA5_-0.36 LILRB1_-0.59 LST1_-0.21 MARCKS_-0.55 MEFV_-0.14 MID1IP1_-0.43 MNDA_-0.80 NCF2_-0.61 PDE4A_-0.33 PLEKHO1_-0.51 …
P300_ly1_all	1.83434e-19	4.27245e-15	AACS_0.3678 ABLIM1_0.5631 ACYP2_0.3604 AFF2_0.6436 ALOX5_0.5113 AMZ2P1_0.3128 ANKRD13A_0.4694 ARHGEF37_0.2346 ARID1B_0.2893 ARID4A_0.3144 ARID4B_0.2786 ARL2BP_0.4364 ASAP1_0.4100 ASB13_0.8640 AUTS2_0.7517 B3GALTL_0.2467 BACH2_0.5981 BAZ2B_0.5021 BBX_0.2787 BCL11A_0.4392 BCL2_0.7678 BCL6_0.6658 BICD1_0.4224 BLK_0.6571 BPTF_0.5767 BRWD1_0.5219 CA13_0.1277 CCDC11_0.1379 CCDC122_0.2955 CD1A_0.2203 CD…	ACSL1_-0.4615 ADAP1_-0.7970 AHK_-0.4648 AMDHD2_-0.3506 ANKRD22_-0.6189 APITD1_-0.3848 APOBEC3B_-0.5810 APOBEC3H_-0.3757 APOC4_-0.1618 ARHGAP31_-0.4227 ARHGEF3_-0.5233 ARID3A_-0.8780 ARID3B_-0.3584 ARID5A_-0.5101 ASL_-0.4540 ASPHD2_-0.3015 ATF3_-0.4257 ATP8B4_-0.1294 BATF_-1.0813 BATF3_-0.7693 BCAN_-0.0324 BCL2A1_-0.8704 BCL2L10_-0.5765 BMP8B_-0.1868 BSPRY_-0.6544 BTBD19_-0.4831 BTN3A2_-0.4946 CAC…
PU.1_NB_all	1.83434e-19	4.27245e-15	AACS_0.3678 ABLIM1_0.5631 ACYP2_0.3604 AFF2_0.6436 ALOX5_0.5113 AMZ2P1_0.3128 ANKRD13A_0.4694 ARHGEF37_0.2346 ARID1B_0.2893 ARID4A_0.3144 ARID4B_0.2786 ARL2BP_0.4364 ASAP1_0.4100 ASB13_0.8640 AUTS2_0.7517 B3GALTL_0.2467 BACH2_0.5981 BAZ2B_0.5021 BBX_0.2787 BCL11A_0.4392 BCL2_0.7678 BCL6_0.6658 BICD1_0.4224 BLK_0.6571 BPTF_0.5767 BRWD1_0.5219 CA13_0.1277 CCDC11_0.1379 CCDC122_0.2955 CD1A_0.2203 CD…	ACSL1_-0.4615 ADAP1_-0.7970 AHK_-0.4648 AMDHD2_-0.3506 ANKRD22_-0.6189 APITD1_-0.3848 APOBEC3B_-0.5810 APOBEC3H_-0.3757 APOC4_-0.1618 ARHGAP31_-0.4227 ARHGEF3_-0.5233 ARID3A_-0.8780 ARID3B_-0.3584 ARID5A_-0.5101 ASL_-0.4540 ASPHD2_-0.3015 ATF3_-0.4257 ATP8B4_-0.1294 BATF_-1.0813 BATF3_-0.7693 BCAN_-0.0324 BCL2A1_-0.8704 BCL2L10_-0.5765 BMP8B_-0.1868 BSPRY_-0.6544 BTBD19_-0.4831 BTN3A2_-0.4946 CAC…
PU.1_CB_all	1.03457e-24	4.27245e-15	AACS_0.3678 ABLIM1_0.5631 ACYP2_0.3604 AFF2_0.6436 ALOX5_0.5113 AMZ2P1_0.3128 ANKRD13A_0.4694 ARHGEF37_0.2346 ARID1B_0.2893 ARID4B_0.2786 ARL2BP_0.4364 ASAP1_0.4100 ASB13_0.8640 AUTS2_0.7517 B3GALTL_0.2467 BACH2_0.5981 BCL11A_0.4392 BCL2_0.7678 BCL6_0.6658 BICD1_0.4224 BLK_0.6571 BPTF_0.5767 BRWD1_0.5219 CA13_0.1277 CCDC11_0.1379 CCDC122_0.2955 CD1A_0.2203 CD22_0.6451 CD79A_0.4884 CD79B_0.5879 CD…	ACSL1_-0.4615 ADAP1_-0.7970 AGMAT_-0.5356 AHK_-0.4648 AMDHD2_-0.3506 APOBEC3B_-0.5810 APOBEC3H_-0.3757 APOC4_-0.1618 ARHGAP31_-0.4227 ARHGEF3_-0.5233 ARID3A_-0.8780 ARID3B_-0.3584 ARID5A_-0.5101 ASL_-0.4540 ASPHD2_-0.3015 ATP1B1_-0.5117 ATP8B4_-0.1294 BATF_-1.0813 BATF3_-0.7693 BCAN_-0.0324 BCL2A1_-0.8704 BCL2L10_-0.5765 BMP8B_-0.1868 BSPRY_-0.6544 BTBD19_-0.4831 CAC1D_-0.3020 CAC1E_-0.0684 CADM1…
Ly1_siBCL6_48h_upreg	0.00299195	1.45649e-14	AUTS2_0.752 BMP3_0.405 CA13_0.128 CD24_0.838 CLGN_0.470 CNR1_0.964 DAAM1_0.624 DMPK_0.254 EBF1_0.567 EF5_0.246 EPB41L2_0.448 GKAP1_0.437 H1FX-AS1_0.173 HRK_0.359 IZUMO4_0.451 KAT6B_0.329 KIAA1377_0.151 KIAA1875_0.079 KIF27_0.109 KIF9-AS1_0.091 KLHL24_0.383 LINC00526_0.294 LOC100128164_0.227 LPP-AS2_0.277 MCTP2_0.382 NBPF1_0.275 NCOA7_0.358 NCOR1_0.403 OR13A1_0.521 PHLPP1_0.405 PROCA1_0.405 RGS20_…	AHK_-0.465 ANKRD18B_-0.194 ARHGAP31_-0.423 ARHGEF3_-0.523 ARID3A_-0.878 BATF_-1.081 BATF3_-0.769 BPGM_-0.397 CADM1_-0.543 CAMK1D_-0.716 CCR7_-0.863 CLEC17A_-1.073 CYSLTR1_-0.504 DCTD_-0.376 DNMT3A_-0.332 EFCAB4A_-0.502 ETHE1_-0.480 FAIM3_-0.825 FGL2_-0.552 GBP1_-0.703 GBP2_-0.572 GMFG_-0.610 GNN_-0.086 HCK_-0.864 IFITM2_-0.511 IQGAP2_-0.488 IRF4_-1.030 KC3_-0.635 KCNJ2-AS1_-0.036 KIAA0226L_-0.740…
PU.1_CB_enhancer	2.51601e-31	1.75989e-14	AACS_0.368 ABLIM1_0.563 ACYP2_0.360 AFF2_0.644 ALOX5_0.511 AMZ2P1_0.313 ANKRD13A_0.469 ARHGEF37_0.235 ARID1B_0.289 ARID4B_0.279 ASAP1_0.410 ASB13_0.864 AUTS2_0.752 B3GALTL_0.247 BACH2_0.598 BCL11A_0.439 BCL2_0.768 BCL6_0.666 BICD1_0.422 BLK_0.657 BPTF_0.577 BRWD1_0.522 CA13_0.128 CCDC122_0.295 CD1A_0.220 CD22_0.645 CD79A_0.488 CD79B_0.588 CDK14_0.733 CHD7_0.283 CHD9_0.326 CLIC4_0.435 CMPK2_0.444 …	ACSL1_-0.4615 ADAP1_-0.7970 AHK_-0.4648 AMDHD2_-0.3506 APOBEC3B_-0.5810 APOBEC3H_-0.3757 APOC4_-0.1618 ARHGAP31_-0.4227 ARHGEF3_-0.5233 ARID3A_-0.8780 ARID3B_-0.3584 ARID5A_-0.5101 ASL_-0.4540 ASPHD2_-0.3015 ATP1B1_-0.5117 ATP8B4_-0.1294 BATF_-1.0813 BATF3_-0.7693 BCAN_-0.0324 BCL2A1_-0.8704 BCL2L10_-0.5765 BMP8B_-0.1868 BSPRY_-0.6544 CAC1D_-0.3020 CAC1E_-0.0684 CADM1_-0.5434 CAMK1D_-0.7156 CCDC1…
NFkB_all_OCILy3_Ly10		8.08371e-13		BATF_-1.08 BCL2A1_-0.87 CCL22_-0.90 CCND2_-0.65 CCR7_-0.86 CD44_-0.77 CFLAR_-0.70 CXCL10_-0.80 CXCL13_-0.87 DUSP2_-0.61 EBI3_-0.95 ELL2_-0.60 IL10_-0.63 IRF4_-1.03 MARCKS_-0.55 NCF2_-0.61
c1.Ep300.down_692	0.0223802	8.55431e-12	ABLIM1_0.56 ARID4B_0.28 BBX_0.28 BPTF_0.58 CCDC122_0.30 CD1A_0.22 CHD9_0.33 CLGN_0.47 CRB2_0.13 CSPP1_0.31 CYP39A1_0.61 MAML3_0.45 MCTP2_0.38 OAT_0.35 PHIP_0.23 PXDNL_0.34 RALGPS2_0.46 SEC62_0.26 SLC25A27_0.60 SNORA54_0.68 TAF4B_0.42 TPCN1_0.39 ZNF318_0.43	APOBEC3H_-0.38 ARID3A_-0.88 ATAD3C_-0.17 ATP1B1_-0.51 BPGM_-0.40 BTBD19_-0.48 C20ORF195_-0.26 C3ORF14_-0.42 CAMK1D_-0.72 CHST2_-0.66 CLEC17A_-1.07 CREB3L2_-0.56 CYSLTR1_-0.50 DHRS9_-0.90 ENTPD1_-0.59 FAIM3_-0.82 FAM26F_-0.69 FAM46C_-0.75 FAM89A_-0.35 FAR2_-0.25 FUT8_-0.59 IL10_-0.63 IQGAP2_-0.49 IRF4_-1.03 IVNS1ABP_-0.47 JAK2_-0.36 KC3_-0.63 LIMD1_-0.64 LRRC56_-0.15 MPEG1_-0.62 NUDT4_-0.31 P2RY10…
NFkB_bothOCILy3andLy10		5.15081e-11		BATF_-1.08 BCL2A1_-0.87 CCL22_-0.90 CCR7_-0.86 CD44_-0.77 CXCL10_-0.80 DUSP2_-0.61 EBI3_-0.95 ELL2_-0.60 IRF4_-1.03 MARCKS_-0.55 NCF2_-0.61
CD40_upregulated_Burkitt_lymphoma		4.14435e-10		ADAM8_-0.67 BATF_-1.08 BCL2A1_-0.87 CCL22_-0.90 CCR7_-0.86 CD44_-0.77 CD58_-0.48 CFLAR_-0.70 DUSP2_-0.61 ELL2_-0.60 HLA-DRB1_-1.13 IRF4_-1.03 IRF5_-0.55 NCF2_-0.61 RXRA_-0.38 SRGN_-0.60
ABC_gt_GCB_Affy		6.56122e-10		BATF_-1.08 CCND2_-0.65 ENTPD1_-0.59 FUT8_-0.59 IRF4_-1.03 MARCKS_-0.55 PIM2_-0.70 PTPN1_-0.62 SP140_-0.49
denovobivGenes		1.01444e-09		ARID3A_-0.88 ARID3B_-0.36 ATF3_-0.43 CADM1_-0.54 CAMK1D_-0.72 CCDC50_-0.63 CD44_-0.77 CREB3L2_-0.56 DNMT3A_-0.33 ELL2_-0.60 ETHE1_-0.48 FABP5_-0.40 FAM26F_-0.69 FAM46C_-0.75 FAM78B_-0.41 FHOD1_-0.35 HHAT_-0.22 IRF4_-1.03 KC3_-0.63 KHDRBS2_-0.24 LFNG_-0.38 LIMD1_-0.64 LOC100506746_-0.20 MAPKAPK3_-0.47 MARCH3_-0.37 MARCKS_-0.55 MGC45922_-0.25 MLKL_-0.46 NEIL2_-0.37 PECR_-0.40 PREX1_-0.53 PRKCZ_-0.4…
Ly1_BCL6RD2mut_upreg	0.0149187	1.01444e-09	AMZ2P1_0.313 AUTS2_0.752 CNR1_0.964 CRB2_0.131 DIP2C_0.343 DMPK_0.254 EBF1_0.567 EF5_0.246 EPB41L2_0.448 FADS3_0.673 GH1_0.307 GKAP1_0.437 GPC2_0.202 GRIK1_0.106 HMGN5_0.519 HRK_0.359 IQCD_0.703 KIAA1875_0.079 KIF27_0.109 KLHL24_0.383 LOC100128164_0.227 LOC283683_0.236 LOC440461_0.324 MCTP2_0.382 MIR600HG_0.259 NBPF1_0.275 OR13A1_0.521 PCDHGA6_0.227 PHLPP1_0.405 PROCA1_0.405 RAPGEF5_0.958 RNFT2_0…	AHK_-0.4648 ARHGAP31_-0.4227 ARID3A_-0.8780 ARID5A_-0.5101 ATF3_-0.4257 BATF_-1.0813 BATF3_-0.7693 CADM1_-0.5434 CAMK1D_-0.7156 CCR7_-0.8629 CD58_-0.4755 CLEC17A_-1.0731 CMAHP_-0.4502 CPAMD8_-0.0248 CYB5R2_-0.7972 CYSLTR1_-0.5041 DNMT3A_-0.3319 EFCAB4A_-0.5025 ETHE1_-0.4797 FAIM3_-0.8249 FAM129C_-0.7749 FGL2_-0.5518 FSTL4_-0.0338 GBP1_-0.7035 GBP5_-0.6668 GMFG_-0.6096 GPANK1_-0.0056 HCK_-0.8643 H…
PU.1_target_ChIPseq_Ebert_Cell_11	1.92241e-05	2.22065e-08	ABLIM1_0.56 ACYP2_0.36 AFF2_0.64 ALOX5_0.51 ARID4B_0.28 ARL2BP_0.44 ASAP1_0.41 ATXN2_0.28 AUTS2_0.75 BACH2_0.60 BAZ2B_0.50 BCL2_0.77 BICD1_0.42 BLK_0.66 BRWD1_0.52 CHD7_0.28 CHD9_0.33 CRHBP_0.35 DAAM1_0.62 DIP2C_0.34 FGD6_0.51 FOXO1_0.35 GGNBP2_0.31 GIGYF2_0.20 GRIK1_0.11 HERC2_0.20 HGST_0.49 HMGN1_0.49 HMGN5_0.52 HRK_0.36 HS2ST1_0.39 HSD17B12_0.48 ITPKB_0.43 JUP_0.70 KANK1_0.50 KCNJ1_0.30 LTBP1_…	ACSL1_-0.4615 ADAP1_-0.7970 ALG1L2_-0.0537 ARHGEF3_-0.5233 ARID3A_-0.8780 ARID3B_-0.3584 ARID5A_-0.5101 ATP8B4_-0.1294 B4GALT2_-0.4209 BCL2A1_-0.8704 BSPRY_-0.6544 CASP10_-0.4370 CASP5_-0.3270 CCND2_-0.6514 CCR7_-0.8629 CD244_-0.3279 CD300A_-0.4412 CD44_-0.7656 CD58_-0.4755 CFLAR_-0.6980 CPVL_-0.6982 CREB3L2_-0.5620 CSNK2B_-0.0097 CYSLTR1_-0.5041 DHRS9_-0.9031 DSE_-0.4349 DUSP5_-0.7381 EHHADH_-0.…
c2.Ep300.down_468		2.12842e-07		ACSS2_-0.31 ARID3A_-0.88 BTBD19_-0.48 DCLK2_-0.21 DSE_-0.43 DUSP5_-0.74 EEF1A2_-0.61 FA2H_-0.50 FGR_-0.55 KCNQ1_-0.23 KHDRBS2_-0.24 KIAA0226L_-0.74 LOC645638_-0.69 PIK3R6_-0.24 PLAC8_-0.83 PPM1J_-0.31 PTPN1_-0.62 RARA_-0.36 RSE6_-0.72 RXRA_-0.38 SERPINB8_-0.37 SIGLEC6_-0.36 SLAMF7_-1.06 SLCO4A1_-0.76 ST6GALC3_-0.19 TBX21_-0.52 TNNI2_-0.63 ZBTB32_-1.03
Resting_monocyte_GNF		3.1104e-07		CKAP4_-0.58 FCGR1A_-0.62 FGL2_-0.55 FOLR3_-0.13 GPBAR1_-0.24 HCK_-0.86 HOMER3_-0.43 LILRA5_-0.36 LST1_-0.21 MNDA_-0.80 NCF2_-0.61 RAB31_-0.51 RASGRP4_-0.67 S100A8_-1.08 S100A9_-1.00 SECTM1_-0.57 TNFSF10_-0.56
IFN_PMBC_2x_Up		3.1104e-07		APOBEC3B_-0.58 CASP10_-0.44 CXCL10_-0.80 DUSP5_-0.74 FGL2_-0.55 GBP1_-0.70 GBP2_-0.57 IL15RA_-0.45 JAK2_-0.36 NMI_-0.46 PSMB9_-0.16 SECTM1_-0.57 TNFSF10_-0.56 VAMP5_-0.83 WARS_-0.56
NK_up_Ebert_cell_11		1.01159e-06		APOBEC3F_-0.34 BTN3A2_-0.49 CASP5_-0.33 CD244_-0.33 CD300A_-0.44 CFLAR_-0.70 FGR_-0.55 GZMB_-0.82 NCALD_-0.38 PDE4A_-0.33 SLAMF7_-1.06 TBX21_-0.52 TGFBR3_-0.30 XCL2_-0.58
PU.1_NB_prom	0.0429842	1.2932e-06	ACYP2_0.3604 ALOX5_0.5113 ANKRD13A_0.4694 ARID4A_0.3144 ARID4B_0.2786 ARL2BP_0.4364 BBX_0.2787 BCL11A_0.4392 BCL6_0.6658 BICD1_0.4224 BLK_0.6571 CA13_0.1277 CCDC11_0.1379 CCDC122_0.2955 CD22_0.6451 CD79A_0.4884 CD79B_0.5879 CDK14_0.7331 DEF8_0.5057 DLG2_0.3294 DJC10_0.4975 DTX1_0.8855 FOXO1_0.3524 HMGN1_0.4885 HMGN5_0.5189 HS2ST1_0.3877 HSD17B12_0.4801 HTR3A_1.0354 ITPKB_0.4257 KCNJ1_0.2985 KCNMB…	AMDHD2_-0.3506 APITD1_-0.3848 APOBEC3B_-0.5810 APOC4_-0.1618 ARHGAP31_-0.4227 ARID3A_-0.8780 ARID3B_-0.3584 ARID5A_-0.5101 ASL_-0.4540 ASPHD2_-0.3015 BCAN_-0.0324 BCL2A1_-0.8704 BSPRY_-0.6544 BTBD19_-0.4831 CAGE1_-0.0055 CAMK1D_-0.7156 CCDC113_-0.2016 CCR7_-0.8629 CD300A_-0.4412 CLEC17A_-1.0731 CPNE8_-0.2236 DCTD_-0.3760 DGKG_-0.5123 DHRS9_-0.9031 DLEU1_-0.3520 DSE1L3_-0.6612 DSE_-0.4349 DUSP15_-…
ABC_gt_GCB_LC		1.56261e-06		CCDC50_-0.63 CCND2_-0.65 ENTPD1_-0.59 FUT8_-0.59 IRF4_-1.03 PTPN1_-0.62
PU.1_CB_prom	0.00951544	1.71245e-06	ACYP2_0.3604 ALOX5_0.5113 ANKRD13A_0.4694 ARID4B_0.2786 ARL2BP_0.4364 BCL11A_0.4392 BICD1_0.4224 BLK_0.6571 CA13_0.1277 CCDC11_0.1379 CCDC122_0.2955 CD22_0.6451 CD79A_0.4884 CD79B_0.5879 CDK14_0.7331 DEF8_0.5057 DLG2_0.3294 DJC10_0.4975 DTX1_0.8855 EBF1_0.5673 ELL3_0.8848 FOXO1_0.3524 HEMGN_0.3432 HOXA7_0.4763 HRK_0.3590 HSD17B12_0.4801 HTR3A_1.0354 KCNJ1_0.2985 KCNMB3_0.6238 KIAA1377_0.1514 KIAA…	AMDHD2_-0.3506 APOBEC3B_-0.5810 APOC4_-0.1618 ARHGAP31_-0.4227 ARID3A_-0.8780 ARID3B_-0.3584 ARID5A_-0.5101 ASL_-0.4540 ASPHD2_-0.3015 BCAN_-0.0324 BCL2A1_-0.8704 BSPRY_-0.6544 BTBD19_-0.4831 CAGE1_-0.0055 CCDC113_-0.2016 CD300A_-0.4412 CLEC17A_-1.0731 CRB3_-0.8086 DGKG_-0.5123 DHRS9_-0.9031 DLEU1_-0.3520 DSE1L3_-0.6612 DSE_-0.4349 DUSP15_-0.9168 DUSP2_-0.6079 DUSP5_-0.7381 ENTPD1_-0.5903 FAIM3_-…
GCB_bivalentProm_genes		1.72917e-06		ARID3A_-0.88 ARID3B_-0.36 ATF3_-0.43 ATP1B1_-0.51 BATF3_-0.77 BCL2L10_-0.58 BSPRY_-0.65 CADM1_-0.54 CAMK1D_-0.72 CCDC50_-0.63 CD44_-0.77 CDS1_-0.11 CKAP4_-0.58 CREB3L2_-0.56 DCTD_-0.38 DNMT3A_-0.33 EFR3B_-0.12 ELL2_-0.60 ETHE1_-0.48 FA2H_-0.50 FABP5_-0.40 FAM26F_-0.69 FAM46C_-0.75 FAM78B_-0.41 FAM89A_-0.35 FHOD1_-0.35 HHAT_-0.22 HOMER1_-0.22 IRF4_-1.03 KC3_-0.63 KCTD15_-0.21 KHDRBS2_-0.24 LFNG_-0…
IFN_PMBC_4x_Up		2.21326e-06		APOBEC3B_-0.58 CASP10_-0.44 CXCL10_-0.80 DUSP5_-0.74 GBP1_-0.70 IL15RA_-0.45 JAK2_-0.36 NMI_-0.46 SECTM1_-0.57 TNFSF10_-0.56 WARS_-0.56
IL10_OCILy3_Up		2.7044e-06		ATF3_-0.43 BATF_-1.08 BATF3_-0.77 CXCL13_-0.87 DHRS9_-0.90 FUT8_-0.59 HLA-E_-0.05 IFITM2_-0.51 IL10_-0.63 LILRB1_-0.59 MNDA_-0.80 PSMB9_-0.16 PTPN1_-0.62
Myc_ChIP_PET_Expr_Down	0.000160081	8.22231e-06	ALOX5_0.51 BCL2_0.77 BLK_0.66 ESR2_0.37 ITPKB_0.43 KIAA0355_0.32 OSBPL10_0.54 PACS1_0.39 PLEKHF2_0.61 SORL1_0.56 SPRED2_0.70 SSBP3_0.39 STAP1_0.55 STRBP_0.67 SWAP70_0.49 TTC9_0.49	ASPHD2_-0.301 BCL2A1_-0.870 CAMK1D_-0.716 CD44_-0.766 ENTPD1_-0.590 FA2H_-0.497 HCK_-0.864 HCST_-0.448 HLA-E_-0.050 IFITM2_-0.511 IRF5_-0.553 MTSS1_-0.491 NFKBID_-0.749 NMI_-0.458 OXTR_-0.066 PREX1_-0.533 SRGN_-0.600 ST3GAL5_-0.427
Myeloid_Node1536		9.00587e-06		HCK_-0.86 LILRB1_-0.59 LST1_-0.21 MNDA_-0.80 NCF2_-0.61 RSE6_-0.72
Tcell_PIind4x_Feske_Fig6		1.30582e-05		ATF3_-0.43 BCL2A1_-0.87 CD44_-0.77 CFLAR_-0.70 DUSP2_-0.61 DUSP5_-0.74 ELL2_-0.60 GZMB_-0.82 IL10_-0.63 IRF4_-1.03 ZBED2_-0.48
Lymph_node_DLBCL		3.2869e-05		BTN3A2_-0.49 CXCL10_-0.80 FCGR1A_-0.62 GBP1_-0.70 GZMB_-0.82 HLA-E_-0.05 IL15RA_-0.45 LILRB1_-0.59 MARCKS_-0.55 PSMB9_-0.16 TNFRSF14_-0.52 VAMP5_-0.83 WARS_-0.56
IRF4_myeloma_induced_direct		3.47419e-05		CFLAR_-0.70 DUSP5_-0.74 ELL2_-0.60 IRF4_-1.03 PIM2_-0.70 SLAMF7_-1.06 SUB1_-0.55
Tcell_down_Ebert_cell_11		3.65502e-05		ACSL1_-0.46 ARID3A_-0.88 ATP1B1_-0.51 ATP8B4_-0.13 BPGM_-0.40 BSPRY_-0.65 CHST2_-0.66 CPVL_-0.70 DHRS9_-0.90 DSE_-0.43 ENTPD1_-0.59 FABP5_-0.40 HCK_-0.86 HLA-DRB1_-1.13 IRF5_-0.55 JAK2_-0.36 KHDRBS2_-0.24 KIAA0226L_-0.74 LILRB1_-0.59 LST1_-0.21 MARCKS_-0.55 MERTK_-0.28 MNDA_-0.80 MPST_-0.53 RAB31_-0.51 RBM47_-0.46 RSE6_-0.72 RXRA_-0.38 S100A8_-1.08 S100A9_-1.00 SIGLEC5_-0.39 TFR2_-0.23 UCK2_-0.39
CTCF_CB_all	1.04945e-08	5.23937e-05	AACS_0.3678 ABLIM1_0.5631 ACYP2_0.3604 AFF2_0.6436 AMZ2P1_0.3128 ANKRD36_0.3116 ANKRD36B_0.2466 ARHGEF37_0.2346 ARID1B_0.2893 ARID4B_0.2786 ASAP1_0.4100 ASB13_0.8640 ATXN2_0.2825 AUTS2_0.7517 B3GALTL_0.2467 BACH2_0.5981 BBX_0.2787 BCL11A_0.4392 BCL2_0.7678 BCL6_0.6658 BCL7A_0.4928 BICD1_0.4224 BLK_0.6571 BMP3_0.4047 BPTF_0.5767 BTBD2_0.3138 CA13_0.1277 CCDC11_0.1379 CCDC144A_0.0796 CCDC144B_0.268…	ABCB9_-0.2663 ACSL1_-0.4615 ACSS2_-0.3129 ACY1_-0.5095 ADAP1_-0.7970 AHK_-0.4648 ALG1L2_-0.0537 ANKRD22_-0.6189 ANXA9_-0.1108 APITD1_-0.3848 APOBEC3B_-0.5810 ARHGAP31_-0.4227 ARHGEF3_-0.5233 ARID3A_-0.8780 ARID3B_-0.3584 ATF3_-0.4257 ATP8B4_-0.1294 BATF_-1.0813 BATF3_-0.7693 BCAN_-0.0324 BCL2A1_-0.8704 BMP8B_-0.1868 BPESC1_-0.0227 BPGM_-0.3967 CAC1D_-0.3020 CAC1E_-0.0684 CADM1_-0.5434 CAMK1D_-0.7…
IRF4_myeloma_induced_all		6.54303e-05		ACSS2_-0.31 APOBEC3B_-0.58 APOBEC3H_-0.38 ATF3_-0.43 ATP6V1E2_-0.27 BSPRY_-0.65 CFLAR_-0.70 DUSP5_-0.74 ELL2_-0.60 IRF4_-1.03 PSA_-0.52 PIM2_-0.70 PTPN6_-0.62 RAB33A_-0.59 SLAMF7_-1.06 ST3GAL1_-0.42 SUB1_-0.55 UCK2_-0.39
STAT3_up_OCILy10		7.35246e-05		CXCL13_-0.87 DHRS9_-0.90 FUT8_-0.59 IL10_-0.63 LILRB1_-0.59 MNDA_-0.80 PSMB9_-0.16
HSC_e-ERY_down_Ebert_cell_11		7.70596e-05		ADAP1_-0.80 AQP3_-0.62 BTN3A2_-0.49 CADM1_-0.54 CCR7_-0.86 CD226_-0.40 CD44_-0.77 DUSP5_-0.74 FAIM3_-0.82 FGR_-0.55 GBP1_-0.70 GIMAP5_-0.61 HLA-E_-0.05 IL10RA_-0.46 IRF4_-1.03 KCNQ1_-0.23 P2RY10_-0.63 PDE4A_-0.33 SKAP1_-0.61 SP140_-0.49 ST3GAL5_-0.43 TBX21_-0.52 TGFBR3_-0.30 TNFRSF14_-0.52 TNFRSF1B_-0.54 ZC3H12A_-0.38
Quiescence_heme_cluster1		0.00011262		ADAM8_-0.67 AHK_-0.46 CD44_-0.77 GMFG_-0.61 HLA-E_-0.05 IL10RA_-0.46 PPM1M_-0.41 PREX1_-0.53 PTPN6_-0.62 SH3BP2_-0.39 TNFSF10_-0.56 VAMP5_-0.83
NB_GCB_Progression_All_Genes_RPKM_minus2		0.00011312		ACSM1_-0.028 AHK_-0.465 ARID3B_-0.358 ASPHD2_-0.301 ATF3_-0.426 CAMK1D_-0.716 CASP10_-0.437 CCR7_-0.863 CHST2_-0.659 CLEC17A_-1.073 CYSLTR1_-0.504 DCLK2_-0.207 DLEU1_-0.352 EDARADD_-0.248 ENTPD1_-0.590 GBP5_-0.667 GZMB_-0.816 IL19_-0.151 IQGAP2_-0.488 JAK2_-0.364 KC3_-0.635 LIMD1_-0.640 MTHFD2_-0.461 MYH15_-0.048 NCF2_-0.607 P2RY10_-0.626 PDE4A_-0.333 PIGR_-0.465 PLAC8_-0.828 PLEKHO1_-0.509 RAB31…
CTCF_NB_all	9.04102e-08	0.000168939	AACS_0.3678 ABLIM1_0.5631 ACYP2_0.3604 AFF2_0.6436 AMZ2P1_0.3128 ANKRD36_0.3116 ANKRD36B_0.2466 ARHGEF37_0.2346 ARID1B_0.2893 ARID4B_0.2786 ASAP1_0.4100 ASB13_0.8640 ATXN2_0.2825 AUTS2_0.7517 B3GALTL_0.2467 BACH2_0.5981 BBX_0.2787 BCL11A_0.4392 BCL2_0.7678 BCL6_0.6658 BCL7A_0.4928 BICD1_0.4224 BLK_0.6571 BMP3_0.4047 BPTF_0.5767 BTBD2_0.3138 CA13_0.1277 CCDC11_0.1379 CCDC122_0.2955 CCDC144A_0.0796…	ABCB9_-0.2663 ABHD6_-0.3579 ACSL1_-0.4615 ACSM1_-0.0284 ACY1_-0.5095 ADAP1_-0.7970 AGMAT_-0.5356 AHK_-0.4648 ANKRD22_-0.6189 ANXA9_-0.1108 APITD1_-0.3848 APOBEC3B_-0.5810 ARHGAP31_-0.4227 ARHGEF3_-0.5233 ATP1B1_-0.5117 ATP8B4_-0.1294 BATF_-1.0813 BATF3_-0.7693 BCAN_-0.0324 BCL2A1_-0.8704 BMP8B_-0.1868 BPESC1_-0.0227 BPGM_-0.3967 BTN3A2_-0.4946 CAC1D_-0.3020 CAC1E_-0.0684 CADM1_-0.5434 CAMK1D_-0.7…
STAT3high_ABC_DLBCL_subgroup		0.00030825		BCL2A1_-0.87 CD44_-0.77 DHRS9_-0.90 DUSP5_-0.74 FUT8_-0.59 HCK_-0.86 MNDA_-0.80 MTHFD2_-0.46 PTPN1_-0.62
JAK_IL10_Ly10_Up		0.000463208		BATF_-1.08 DHRS9_-0.90 FUT8_-0.59 IFITM2_-0.51 LILRB1_-0.59 MNDA_-0.80
Blood_CD4+Tcell_gt_thymic_SP_CD4+Tcell		0.000463208		CKAP4_-0.58 GBP5_-0.67 GIMAP5_-0.61 IL10RA_-0.46 IL6R_-0.57 NFKBIZ_-0.66 TGFBR3_-0.30
NFkB_Targets		0.00049954		BCL2A1_-0.87 BCL2L10_-0.58 CCR7_-0.86 CD44_-0.77 CFLAR_-0.70 CXCL10_-0.80 IL10_-0.63 IL15RA_-0.45 IRF4_-1.03 NFKBIZ_-0.66 PSMB9_-0.16
CTCF_CB_enhancer	2.00839e-09	0.000573685	AACS_0.3678 ABLIM1_0.5631 ACYP2_0.3604 AFF2_0.6436 AMZ2P1_0.3128 ARHGEF37_0.2346 ARID1B_0.2893 ARID4B_0.2786 ASAP1_0.4100 ASB13_0.8640 ATXN2_0.2825 AUTS2_0.7517 B3GALTL_0.2467 BACH2_0.5981 BBX_0.2787 BCL11A_0.4392 BCL2_0.7678 BCL6_0.6658 BCL7A_0.4928 BICD1_0.4224 BLK_0.6571 BMP3_0.4047 BPTF_0.5767 BTBD2_0.3138 CA13_0.1277 CCDC11_0.1379 CCDC144A_0.0796 CCDC144B_0.2680 CCDC152_0.3997 CCL28_0.4050 C…	ABCB9_-0.2663 ACSL1_-0.4615 ADAP1_-0.7970 AHK_-0.4648 ANKRD22_-0.6189 ANXA9_-0.1108 APOBEC3B_-0.5810 ARHGAP31_-0.4227 ARHGEF3_-0.5233 ARID3A_-0.8780 ARID3B_-0.3584 ATF3_-0.4257 ATP8B4_-0.1294 BATF_-1.0813 BATF3_-0.7693 BCAN_-0.0324 BCL2A1_-0.8704 BMP8B_-0.1868 BPESC1_-0.0227 BPGM_-0.3967 CAC1D_-0.3020 CAC1E_-0.0684 CADM1_-0.5434 CAMK1D_-0.7156 CASP10_-0.4370 CASP5_-0.3270 CCDC113_-0.2016 CCDC50_-…
CTCF_NB_enhancer	8.23722e-09	0.000639411	AACS_0.3678 ABLIM1_0.5631 ACYP2_0.3604 AFF2_0.6436 AMZ2P1_0.3128 ARHGEF37_0.2346 ARID1B_0.2893 ARID4B_0.2786 ASAP1_0.4100 ASB13_0.8640 ATXN2_0.2825 AUTS2_0.7517 BACH2_0.5981 BBX_0.2787 BCL11A_0.4392 BCL2_0.7678 BCL6_0.6658 BCL7A_0.4928 BICD1_0.4224 BLK_0.6571 BMP3_0.4047 BPTF_0.5767 BTBD2_0.3138 CA13_0.1277 CCDC11_0.1379 CCDC122_0.2955 CCDC144A_0.0796 CCDC144B_0.2680 CCL28_0.4050 CD1A_0.2203 CDK1…	ABCB9_-0.2663 ABHD6_-0.3579 ACSL1_-0.4615 ADAP1_-0.7970 AGMAT_-0.5356 AHK_-0.4648 ANKRD22_-0.6189 ANXA9_-0.1108 APOBEC3B_-0.5810 ARHGAP31_-0.4227 ARHGEF3_-0.5233 ATP8B4_-0.1294 BATF_-1.0813 BATF3_-0.7693 BCAN_-0.0324 BCL2A1_-0.8704 BMP8B_-0.1868 BPESC1_-0.0227 BPGM_-0.3967 BTN3A2_-0.4946 CAC1D_-0.3020 CAC1E_-0.0684 CADM1_-0.5434 CAMK1D_-0.7156 CASP10_-0.4370 CASP5_-0.3270 CCDC50_-0.6337 CCDC68_-0…
CTCF_ly1_enhancer	1.66629e-11	0.00108561	AACS_0.3678 ABLIM1_0.5631 ACYP2_0.3604 AFF2_0.6436 ALOX5_0.5113 AMZ2P1_0.3128 ANKRD13A_0.4694 ARHGEF37_0.2346 ARID1B_0.2893 ARID4A_0.3144 ARID4B_0.2786 ASAP1_0.4100 ASB13_0.8640 ATXN2_0.2825 AUTS2_0.7517 B3GALTL_0.2467 BACH2_0.5981 BAZ2B_0.5021 BBX_0.2787 BCL11A_0.4392 BCL2_0.7678 BCL6_0.6658 BCL7A_0.4928 BICD1_0.4224 BLK_0.6571 BMP3_0.4047 BMP7_0.8799 BPTF_0.5767 BTBD2_0.3138 CA13_0.1277 CCDC11_…	ABCB9_-0.2663 ABHD6_-0.3579 ACSL1_-0.4615 ACSM1_-0.0284 ADAP1_-0.7970 AGMAT_-0.5356 AHK_-0.4648 ANKRD22_-0.6189 ANXA9_-0.1108 APOBEC3B_-0.5810 ARHGAP31_-0.4227 ARHGEF3_-0.5233 ARID3A_-0.8780 ARID3B_-0.3584 ARID5A_-0.5101 ASL_-0.4540 ATF3_-0.4257 ATP1B1_-0.5117 ATP8B4_-0.1294 B4GALT2_-0.4209 BATF_-1.0813 BATF3_-0.7693 BCAN_-0.0324 BCL2A1_-0.8704 BMP8B_-0.1868 BPESC1_-0.0227 BPGM_-0.3967 BSPRY_-0.6…
IRF4_myeloma_induced_Agilent		0.00112687		ACSS2_-0.31 APOBEC3B_-0.58 APOBEC3H_-0.38 ATF3_-0.43 ATP6V1E2_-0.27 BSPRY_-0.65 CFLAR_-0.70 ELL2_-0.60 PSA_-0.52 PTPN6_-0.62 RAB33A_-0.59 SLAMF7_-1.06
Tcell_cytokine_induced_PMBC_Bcell_induced		0.00118327		CCND2_-0.65 DUSP5_-0.74 GBP1_-0.70 IRF4_-1.03 WARS_-0.56
ARID1A_mut_up_141_Ash_FL		0.00118327		APOBEC3F_-0.34 LAX1_-0.50 LFNG_-0.38 P2RY10_-0.63 PIM2_-0.70 PLEKHO1_-0.51 PSMB9_-0.16 SIDT1_-0.37 TGIF1_-0.59 TNFSF10_-0.56
Thymic_SP_CD4+Tcell_gt_Thymic_DP_Tcell		0.00134433		CCR7_-0.86 CD44_-0.77 GBP1_-0.70 GBP2_-0.57 GIMAP5_-0.61 HLA-E_-0.05 IL6R_-0.57 TNFRSF1B_-0.54 TNFSF10_-0.56
NFKB_K1106		0.00143383		BCL2A1_-0.87 CCL22_-0.90 CD44_-0.77 DUSP2_-0.61
Splenic_marginal_zone_Bcell_gt_GC_Bcell		0.00148842		CCDC50_-0.63 CD44_-0.77 DLEU1_-0.35 FAM129C_-0.77 GBP2_-0.57 MPEG1_-0.62
Quiescence_heme_all		0.00177323		ADAM8_-0.67 AHK_-0.46 CAMK1D_-0.72 CD44_-0.77 GMFG_-0.61 HLA-E_-0.05 IL10RA_-0.46 NFKBIZ_-0.66 PPM1M_-0.41 PREX1_-0.53 PTPN6_-0.62 SH3BP2_-0.39 TNFSF10_-0.56 VAMP5_-0.83
IRF4_myeloma_induced_Lymphochip		0.00192364		DUSP5_-0.74 ELL2_-0.60 IRF4_-1.03 PIM2_-0.70 PTPN6_-0.62 SLAMF7_-1.06 ST3GAL1_-0.42 SUB1_-0.55 UCK2_-0.39
NB_GCB_Progression_All_Genes_RPKM_enhancer_loss_minus3_minus4		0.00219102		ARHGEF3_-0.523 ATF3_-0.426 CCND2_-0.651 CCR7_-0.863 CREB3L2_-0.562 GZMB_-0.816 IL19_-0.151 IQGAP2_-0.488 KHDRBS2_-0.242 LILRB1_-0.595 MARCKS_-0.552 MYH15_-0.048 P2RY10_-0.626 PTGER4_-0.566 PTPN1_-0.616 RIN3_-0.445 ST3GAL1_-0.420 TRPM2_-0.386 ZC3H12A_-0.383
Bcell_down_Ebert_cell_11		0.00242453		ATP8B4_-0.13 CD226_-0.40 CD244_-0.33 CD300A_-0.44 CD58_-0.48 FAR2_-0.25 GBP2_-0.57 GIMAP5_-0.61 IQGAP2_-0.49 MAPKAPK3_-0.47 PHACTR2_-0.35 PSTPIP2_-0.66 S100A4_-0.83 SLAMF7_-1.06 TNFSF10_-0.56
Dendritic_cell_CD123pos_blood	0.00466253	0.00299349	ANKRD36B_0.25 BCL11A_0.44 IPW_0.24 KANK1_0.50 KCNH8_0.21 MAGED1_0.56 MAP4K4_0.39 MYO1E_0.77 OFD1_0.30 PAG1_0.46 SORL1_0.56 STRBP_0.67 TCL6_0.34 USP11_0.34 WASF1_0.41	AQP3_-0.62 BSPRY_-0.65 CCDC50_-0.63 CREB3L2_-0.56 CYSLTR1_-0.50 DUSP5_-0.74 FAM129C_-0.77 GZMB_-0.82 HHAT_-0.22 LEPREL1_-0.23 LIME1_-0.53 SIDT1_-0.37 ST6GALC4_-0.61 STAMBPL1_-0.62 TOX2_-0.80
Plasma_cell_gt_mature_Bcell		0.00301752		CASP10_-0.44 CFLAR_-0.70 HCST_-0.45 SLAMF7_-1.06 SSR3_-0.40
Tcell_PIind_CalciumDefPtdown4x_Feske_Fig6		0.00320582		ATF3_-0.43 CFLAR_-0.70 ELL2_-0.60 GZMB_-0.82 IL10_-0.63 IRF4_-1.03 ZBED2_-0.48
IL6_Ly10_Up_all		0.00329114		BATF_-1.08 DUSP2_-0.61 IL10_-0.63 IRF4_-1.03 PTPN1_-0.62
Monocyte_4x_U133plus		0.0033405		ATF3_-0.43 CKAP4_-0.58 CPVL_-0.70 DSE_-0.43 EMR1_-0.42 HCK_-0.86 HOMER3_-0.43 LILRB1_-0.59 MARCKS_-0.55 NCF2_-0.61 RBM47_-0.46 S100A8_-1.08 S100A9_-1.00
CTCF_ly1_all	2.84834e-12	0.00350025	AACS_0.3678 ABLIM1_0.5631 ACYP2_0.3604 AFF2_0.6436 ALOX5_0.5113 AMZ2P1_0.3128 ANKRD13A_0.4694 ANKRD36_0.3116 ANKRD36B_0.2466 ARHGEF37_0.2346 ARID1B_0.2893 ARID4A_0.3144 ARID4B_0.2786 ASAP1_0.4100 ASB13_0.8640 ATXN2_0.2825 AUTS2_0.7517 B3GALTL_0.2467 BACH2_0.5981 BAZ2B_0.5021 BBX_0.2787 BCL11A_0.4392 BCL2_0.7678 BCL6_0.6658 BCL7A_0.4928 BICD1_0.4224 BLK_0.6571 BMP3_0.4047 BMP7_0.8799 BPTF_0.5767 B…	ABCB9_-0.2663 ABHD6_-0.3579 ACSL1_-0.4615 ACSM1_-0.0284 ACSS2_-0.3129 ACY1_-0.5095 ADAP1_-0.7970 AGMAT_-0.5356 AHK_-0.4648 ANKRD22_-0.6189 ANXA9_-0.1108 APITD1_-0.3848 APOBEC3B_-0.5810 AQP3_-0.6173 ARHGAP31_-0.4227 ARHGEF3_-0.5233 ARID3A_-0.8780 ARID3B_-0.3584 ARID5A_-0.5101 ASL_-0.4540 ATF3_-0.4257 ATP1B1_-0.5117 ATP8B4_-0.1294 B4GALT2_-0.4209 BATF_-1.0813 BATF3_-0.7693 BCAN_-0.0324 BCL2A1_-0.87…
Tcell_cytokine_induced_IL2_IL7_IL15only		0.00374451		CCND2_-0.65 DUSP5_-0.74 TNFSF10_-0.56 WARS_-0.56
Tcell_PIind4x_Feske_Fig4		0.0042134		BCL2A1_-0.87 CD44_-0.77 CFLAR_-0.70 ELL2_-0.60 IL10_-0.63 IRF4_-1.03 ZBED2_-0.48
ly1.promoter.BCL6.SMRT.BCOR.341	0.0242913	0.00458449	BCL6_0.67 CD22_0.65 CD79A_0.49 CD79B_0.59 EF5_0.25 GGNBP2_0.31 KCNH8_0.21 KLHL5_0.32 MTA3_0.61 PTK2_0.50 SLC30A4_0.45 SNX22_0.50 SPRED2_0.70 SSBP2_0.63	ARHGAP31_-0.42 ARID3A_-0.88 CFLAR_-0.70 FAIM3_-0.82 IQGAP2_-0.49 LIMD1_-0.64 MPEG1_-0.62 NFKBID_-0.75 PORCN_-0.34 RAB43_-0.28 RBM47_-0.46 RHEBL1_-0.30 SP140_-0.49 SUB1_-0.55 TNFRSF1B_-0.54
IL6_Ly10_Up_group1		0.00490222		BATF_-1.08 DUSP2_-0.61 IL10_-0.63 IRF4_-1.03
PMBL_HL_high		0.00547442		BATF3_-0.77 CD58_-0.48 GBP1_-0.70 JAK2_-0.36 TNFRSF14_-0.52 TNFSF10_-0.56
Tcell_PIind_CsAdown4x		0.00547442		CFLAR_-0.70 ELL2_-0.60 GZMB_-0.82 IL10_-0.63 IRF4_-1.03 ZBED2_-0.48
Resting_dendritic_cell_GNF		0.0057894		CCDC50_-0.63 DUSP5_-0.74 FUT7_-0.39 HLA-DRB1_-1.13 IRF4_-1.03 LEPREL1_-0.23 TOX2_-0.80
p53_targets		0.00593026		ARID3A_-0.88 ATF3_-0.43 CASP10_-0.44 DUSP5_-0.74 IRF5_-0.55 PLK3_-0.55 PPM1J_-0.31 TRPM2_-0.39
GCB.promoter.BCL6.SMRT.BCOR.1306	0.00204526	0.0128222	ABLIM1_0.56 AMZ2P1_0.31 BCL6_0.67 BLK_0.66 BRWD1_0.52 CCDC11_0.14 CD22_0.65 CD79A_0.49 CD79B_0.59 CDK14_0.73 CLIC4_0.43 DEF8_0.51 DJC10_0.50 ELL3_0.88 FADS3_0.67 GGNBP2_0.31 HEMGN_0.34 HTR3A_1.04 KCNH8_0.21 KCNJ1_0.30 KCNMB3_0.62 KDM5A_0.21 KIAA1429_0.38 KLHL5_0.32 LMO2_0.68 LY86_0.66 MAML3_0.45 MAPK10_0.88 MARCKSL1_0.92 MTA3_0.61 MYBL1_0.75 NEIL1_0.78 OFD1_0.30 PFKM_0.32 PTK2_0.50 SERPI9_1.85 SN…	ABCB9_-0.27 ADAM8_-0.67 ARID3A_-0.88 ARID5A_-0.51 BCL2A1_-0.87 BPGM_-0.40 CFLAR_-0.70 CLEC17A_-1.07 DCTD_-0.38 DLEU1_-0.35 DSE_-0.43 DUSP2_-0.61 DUSP5_-0.74 FAIM3_-0.82 FAM129C_-0.77 HCST_-0.45 HOMER1_-0.22 HTRA2_-0.33 IQGAP2_-0.49 IVNS1ABP_-0.47 LIMD1_-0.64 MARCKS_-0.55 MPEG1_-0.62 NCF2_-0.61 NFKBID_-0.75 NFKBIZ_-0.66 PORCN_-0.34 RAB43_-0.28 RBM47_-0.46 RGS14_-0.40 RHEBL1_-0.30 SLC25A30_-0.33 SP…
GCB.promoter.BCL6-SMRT.all.1306	0.00204526	0.0128222	ABLIM1_0.56 AMZ2P1_0.31 BCL6_0.67 BLK_0.66 BRWD1_0.52 CCDC11_0.14 CD22_0.65 CD79A_0.49 CD79B_0.59 CDK14_0.73 CLIC4_0.43 DEF8_0.51 DJC10_0.50 ELL3_0.88 FADS3_0.67 GGNBP2_0.31 HEMGN_0.34 HTR3A_1.04 KCNH8_0.21 KCNJ1_0.30 KCNMB3_0.62 KDM5A_0.21 KIAA1429_0.38 KLHL5_0.32 LMO2_0.68 LY86_0.66 MAML3_0.45 MAPK10_0.88 MARCKSL1_0.92 MTA3_0.61 MYBL1_0.75 NEIL1_0.78 OFD1_0.30 PFKM_0.32 PTK2_0.50 SERPI9_1.85 SN…	ABCB9_-0.27 ADAM8_-0.67 ARID3A_-0.88 ARID5A_-0.51 BCL2A1_-0.87 BPGM_-0.40 CFLAR_-0.70 CLEC17A_-1.07 DCTD_-0.38 DLEU1_-0.35 DSE_-0.43 DUSP2_-0.61 DUSP5_-0.74 FAIM3_-0.82 FAM129C_-0.77 HCST_-0.45 HOMER1_-0.22 HTRA2_-0.33 IQGAP2_-0.49 IVNS1ABP_-0.47 LIMD1_-0.64 MARCKS_-0.55 MPEG1_-0.62 NCF2_-0.61 NFKBID_-0.75 NFKBIZ_-0.66 PORCN_-0.34 RAB43_-0.28 RBM47_-0.46 RGS14_-0.40 RHEBL1_-0.30 SLC25A30_-0.33 SP…
KLF2_repressed		0.0131714		BATF3_-0.77 DCTD_-0.38 FAM46C_-0.75 HOMER1_-0.22 IQGAP2_-0.49 MAPKAPK3_-0.47 PLAC8_-0.83
DC_TLR4_TLR8_synergy		0.0147277		DUSP2_-0.608 IL12A_-0.351 KISS1R_-0.324 OXTR_-0.066
Hematopoietic_Node1658		0.0152263		BTN3A2_-0.49 FGR_-0.55 GMFG_-0.61 IL10RA_-0.46 PLAC8_-0.83 PTPN6_-0.62
NB_GCB_Progression_All_Genes_RPKM_minus2.to.plus2		0.0169505		ABCB9_-0.2663 ABHD6_-0.3579 ADAM8_-0.6724 ADAP1_-0.7970 AGMAT_-0.5356 ANKRD22_-0.6189 APOBEC3F_-0.3414 ARID3A_-0.8780 ASL_-0.4540 BCAN_-0.0324 BCL2L10_-0.5765 BPGM_-0.3967 BTN3A2_-0.4946 CAC1E_-0.0684 CCDC50_-0.6337 CCL22_-0.8989 CD300A_-0.4412 CDH20_-0.0048 CKAP4_-0.5832 CPAMD8_-0.0248 CPNE8_-0.2236 CR1L_-0.4432 CXCL13_-0.8745 DH14_-0.2675 DSE1L3_-0.6612 DSCAML1_-0.1223 DUSP15_-0.9168 EEF1A2_-0.…
Tcell_PIind_CalciumDefPtdown4x_Feske_Fig4		0.0170177		CFLAR_-0.70 ELL2_-0.60 IL10_-0.63 PTPN1_-0.62 ZBED2_-0.48
NFkB_OCILy10_only		0.017105		CCND2_-0.65 CFLAR_-0.70 IL10_-0.63
IKZF1_CB_enhancer	0.000116243	0.0180324	CCDC122_0.30 CRB2_0.13 DLG2_0.33 ELL3_0.88 FAM81A_0.56 FOXO1_0.35 GGNBP2_0.31 ICOSLG_0.48 ITPKB_0.43 MAML3_0.45 MEF2B_0.67 MSI2_0.58 MYO1E_0.77 NEIL1_0.78 NEK6_0.59 PTK2_0.50 RUSC1_0.24 SERPI9_1.85 SIPA1L3_0.32 SPRED2_0.70 TTC9_0.49 VPREB1_0.32	ARHGAP31_-0.42 DGKG_-0.51 FUT8_-0.59 IL10RA_-0.46 IL6R_-0.57 LMTK3_-0.20 MEFV_-0.14 PTPN6_-0.62 RARA_-0.36 RIN3_-0.45 RXRA_-0.38 SEMA7A_-0.61 SH3BP2_-0.39 SIGLEC5_-0.39 ST3GAL1_-0.42 VOPP1_-0.45
BCL6_repressed		0.0193984		CCND2_-0.65 CD44_-0.77 CXCL10_-0.80
Thymic_DP_Tcell_gt_Thymic_progenitor_Tcell		0.0199406		FAIM3_-0.82 MTSS1_-0.49 SKAP1_-0.61 SYTL3_-0.45 TOX2_-0.80
ly1.promoter.BCL6-SMRT.all.451	6.55335e-05	0.0226976	BCL6_0.67 CD22_0.65 CD79A_0.49 CD79B_0.59 CDK14_0.73 DLG2_0.33 DJC10_0.50 EFCAB5_0.16 EF5_0.25 GGNBP2_0.31 HEMGN_0.34 KCNH8_0.21 KLHL5_0.32 MTA3_0.61 NCOR1_0.40 PTK2_0.50 SLC30A4_0.45 SNX22_0.50 SPRED2_0.70 SSBP2_0.63 STAP1_0.55 SYNE2_0.33 TPD52_0.57	ARHGAP31_-0.42 ARID3A_-0.88 CFLAR_-0.70 FAIM3_-0.82 IL10_-0.63 IQGAP2_-0.49 LIMD1_-0.64 MPEG1_-0.62 NFKBID_-0.75 PORCN_-0.34 RAB43_-0.28 RBM47_-0.46 RHEBL1_-0.30 SP140_-0.49 SUB1_-0.55 TNFRSF1B_-0.54
Myc_ChIP_PET_2plus		0.0229793		ABCB9_-0.266 ARHGEF3_-0.523 ARID3A_-0.878 ASL_-0.454 ASPHD2_-0.301 BATF3_-0.769 BCL2A1_-0.870 BMP8B_-0.187 CAMK1D_-0.716 CCDC113_-0.202 CCDC68_-0.087 CCND2_-0.651 CD44_-0.766 CKAP4_-0.583 CPO_-0.014 CPVL_-0.698 CREB3L2_-0.562 DCLK2_-0.207 DGKG_-0.512 DUSP15_-0.917 EEF1A2_-0.610 EHHADH_-0.328 ENTPD1_-0.590 ETV2_-0.186 FA2H_-0.497 FAM129C_-0.775 FAR2_-0.247 FCGR1B_-0.393 FGL2_-0.552 FGR_-0.554 FSTL…
Splenic_Marginal_zone_Bcell_gt_naive_and_GC_Bcell		0.027389		CCDC50_-0.63 DLEU1_-0.35 MARCKS_-0.55
NB_GCB_Progression_All_Genes_RPKM_plus2	6.64016e-06	0.029595	ABLIM1_0.563 BICD1_0.422 CAMK1_0.461 CCDC11_0.138 CHD6_0.296 CLIC4_0.435 CLSTN1_0.330 CRB2_0.131 CYP39A1_0.611 DEF8_0.506 DIP2C_0.343 DLG2_0.329 DTX1_0.886 EBF1_0.567 ELL3_0.885 EML6_0.582 GGNBP2_0.305 HDAC1_0.512 HEMGN_0.343 ICOSLG_0.479 KIAA1211_0.328 LY86_0.659 MEN1_0.291 MGMT_0.506 MYO9A_0.362 NCOA7_0.358 NKX6-3_0.320 NTF3_0.290 PCDHGA1_0.167 PCDHGA2_0.127 PEX5_0.341 PFN2_0.718 PHLPP1_0.405 P…	ACSL1_-0.4615 BATF3_-0.7693 BMP8B_-0.1868 CAC1D_-0.3020 CCDC113_-0.2016 CCDC68_-0.0875 CD226_-0.3983 CD244_-0.3279 CD44_-0.7656 CFLAR_-0.6980 DUSP2_-0.6079 DUSP5_-0.7381 FGR_-0.5536 FHOD1_-0.3534 FUT8_-0.5934 HCK_-0.8643 HS3ST5_-0.0078 IL10_-0.6259 IL12A_-0.3510 IL6R_-0.5734 INPP5A_-0.2346 MIR155HG_-1.0382 NTRK1_-0.0578 PLA2G2C_-0.2019 PRR5_-0.4216 RARA_-0.3578 ROPN1L_-0.1143 SH3BP2_-0.3918 SP140…
IRF3_target_gene		0.0298486		CCDC50_-0.63 CXCL10_-0.80 FAM46C_-0.75 GBP2_-0.57 IL15RA_-0.45 PSMB9_-0.16 RTP4_-0.44 TNFSF10_-0.56
Myeloma_CD-1_subgroup_up		0.0302785		BATF3_-0.77 RAB31_-0.51 RAB33A_-0.59 TOX2_-0.80
KLF2_induced		0.0391934		CASP10_-0.44 CCND2_-0.65 HLA-E_-0.05 IL10RA_-0.46 RGS14_-0.40 S100A4_-0.83
GCB_BCL6SMRT_Distal_Enhancer	1.70798e-09	0.000276674	AMZ2P1_0.313 B3GALTL_0.247 BACH2_0.598 BCL11A_0.439 BCL6_0.666 CHD7_0.283 CNR1_0.964 DJC5B_0.692 DNER_0.389 FAM81A_0.560 GLI3_0.236 LMO2_0.681 MCTP2_0.382 METAP2_0.595 MFHAS1_0.691 MGAT5_0.539 MYBL1_0.755 NEK6_0.590 NKX6-3_0.320 PAG1_0.460 PDGFD_0.566 RASL11A_1.296 RNGTT_0.514 SEL1L3_0.643 SLC1A1_0.402 SNX30_0.359 SORL1_0.563 SPO11_0.031 SPRED2_0.697 SYPL1_0.409 TCL1B_1.151 USP6NL_0.466 WEE1_0.47…	ARHGAP25_-0.418 BATF3_-0.769 BCL2A1_-0.870 BTN3A2_-0.495 CCDC113_-0.202 CCL22_-0.899 CCR1_-0.423 CD97_-0.397 DHRS9_-0.903 DNMT3A_-0.332 DUSP5_-0.738 FCRL4_-0.353 FCRL5_-0.754 HMOX1_-0.456 ID2_-0.372 IL10_-0.626 KIAA0125_-0.382 KLF2_-0.484 LHX2_-0.197 LRRC25_-0.435 LSM6_-0.296 MPEG1_-0.621 MREG_-0.393 POU5F1B_-0.097 PRR18_-0.116 RASGRF1_-0.400 RUNX3_-0.327 RXRG_-0.039 SEMA7A_-0.615 SH3BP2_-0.392 S…
crebbp.ly7.enhancer		0.0264832		ABCB9 ACSM1 ADAP1 ANKRD22 AQP3 ARHGEF3 ATP6V1E2 BATF3 BCL2A1 BMP8B BSPRY BTBD19 BTN3A2 CACNA1D CAMK1D CASP10 CCDC113 CCR7 CD300A CD44 CFLAR CLEC17A CPAMD8 CREB3L2 CYSLTR1 DGKG DLEU1 DNASE1L3 DNMT3A DSE DUSP15 DUSP2 DUSP5 ENTPD1 FA2H FABP5 FAIM3 FAM46C FCRL5 FGR FSTL4 FUT8 HCK HHAT HLA-E IL19 IQGAP2 IRF4 LIMD1 LOC400927 MAPKAPK3 MEI1 MLKL MTSS1 NCF2 NFKBID NFKBIZ NRXN1 NUDT4 PAOX PDE4A PIM2 PLA2G2…
ly1.enhancer.INTRONIC.DISTAL.BCL6-SMRT.DRE.1275	1.76415e-24		ABLIM1_0.563 ACYP2_0.360 AFF2_0.644 ARHGEF37_0.235 ARID1B_0.289 ASAP1_0.410 AUTS2_0.752 BACH2_0.598 BCL11A_0.439 BCL2_0.768 BCL6_0.666 BCL7A_0.493 BICD1_0.422 BMP7_0.880 CD1A_0.220 CD22_0.645 CDK14_0.733 CHD7_0.283 CNR1_0.964 CRB2_0.131 DAAM1_0.624 DIP2C_0.343 DLG2_0.329 DJC5B_0.692 EBF1_0.567 EEPD1_0.732 EF5_0.246 ESR2_0.365 FAM81A_0.560 FBXW8_0.336 FOXO1_0.352 GLI3_0.236 HRK_0.359 IQCD_0.703 IT…
ERY_down_Ebert_cell_11	0.0113996		ABLIM1_0.5631 ACYP2_0.3604 ANKRD36B_0.2466 ARID4B_0.2786 ATXN2_0.2825 AUTS2_0.7517 BACH2_0.5981 BPTF_0.5767 BRWD1_0.5219 CLSTN1_0.3304 DHRS1_0.2798 DHX16_0.0019 DJC10_0.4975 FOXO1_0.3524 GGNBP2_0.3052 GNRH1_0.1588 HGST_0.4879 HMGN1_0.4885 HOXA7_0.4763 ITPKB_0.4257 ITSN2_0.4822 KLHL24_0.3834 LINC00342_0.2679 LRRC37A3_0.1381 LUC7L3_0.4154 MAPK10_0.8784 OFD1_0.2992 OSBPL3_0.4010 PHIP_0.2333 PNISR_0.…
GC_B_cell_U133Plus	6.13325e-43		AFF2_0.64 BCL6_0.67 BCL7A_0.49 BICD1_0.42 BMP7_0.88 BPTF_0.58 BRWD1_0.52 CMPK2_0.44 CYP39A1_0.61 DAAM1_0.62 DSE1_0.53 ELL3_0.88 FGD6_0.51 HEMGN_0.34 HS2ST1_0.39 HTR3A_1.04 ILDR1_0.30 KCNJ1_0.30 KCNK12_0.92 KCNMB4_0.47 KIAA1211_0.33 LMO2_0.68 MAML3_0.45 MAP4K4_0.39 MCTP2_0.38 MED12L_0.30 MEF2B_0.67 MFHAS1_0.69 MIXL1_0.78 MME_1.38 MTA3_0.61 MYBL1_0.75 MYEF2_0.32 NCOA7_0.36 NKX6-3_0.32 NPAS1_0.20 PA…
GC_B_cell_BL_equal_DLBCL	3.29918e-25		BCL6_0.67 BICD1_0.42 BPTF_0.58 BRWD1_0.52 CMPK2_0.44 DAAM1_0.62 ELL3_0.88 HEMGN_0.34 HS2ST1_0.39 HTR3A_1.04 KCNJ1_0.30 KCNK12_0.92 KCNMB4_0.47 KIAA1211_0.33 MAP4K4_0.39 MCTP2_0.38 MEF2B_0.67 MFHAS1_0.69 MIXL1_0.78 MTA3_0.61 MYBL1_0.75 MYEF2_0.32 NCOA7_0.36 NPAS1_0.20 PAG1_0.46 PCDHGC3_0.82 PDGFD_0.57 PLEKHF2_0.61 PSIP1_0.48 PTK2_0.50 RAPGEF5_0.96 S1PR2_0.79 SCRN1_0.65 SLC30A4_0.45 SPRED2_0.70 STA…
Germinal_center_Bcell_DLBCL	4.7035e-25		BCL6_0.67 BCL7A_0.49 DJC10_0.50 DTX1_0.89 KLHL5_0.32 MAPK10_0.88 MEF2B_0.67 MFHAS1_0.69 MME_1.38 MYBL1_0.75 OSBPL3_0.40 PAG1_0.46 PCDHGC3_0.82 PTK2_0.50 RAPGEF5_0.96 SERPI9_1.85 SLC1A1_0.40 SORL1_0.56 SPRED2_0.70 STAP1_0.55 SYNE2_0.33 TOX_0.61 VPREB3_1.27 ZNF608_0.59
P300_ly1_enhancer	1.99927e-24		AACS_0.368 ABLIM1_0.563 ARID1B_0.289 AUTS2_0.752 B3GALTL_0.247 BACH2_0.598 BCL11A_0.439 BCL2_0.768 BCL6_0.666 BICD1_0.422 BMP3_0.405 BPTF_0.577 CD22_0.645 CD79B_0.588 CDK14_0.733 CHD7_0.283 CRB2_0.131 DAAM1_0.624 DIP2C_0.343 DLG2_0.329 DJC5B_0.692 DTX1_0.886 EBF1_0.567 EEPD1_0.732 EFCAB5_0.161 EF5_0.246 ELL3_0.885 ESR2_0.365 FAM81A_0.560 FOXO1_0.352 GGNBP2_0.305 HOXA7_0.476 HRK_0.359 ICOSLG_0.479…
ARID1A_mut_down_390_Ash_FL	2.12624e-24		AACS_0.37 ANKRD13A_0.47 ARL2BP_0.44 ASB13_0.86 BCL6_0.67 BCL7A_0.49 BICD1_0.42 CHD9_0.33 CLIC4_0.43 DEF8_0.51 DSE1_0.53 FGD6_0.51 GCHFR_0.49 HGST_0.49 HMGN1_0.49 HS2ST1_0.39 KANK1_0.50 KCNMB3_0.62 LMO2_0.68 MAML3_0.45 MARCKSL1_0.92 MFHAS1_0.69 MYBL1_0.75 MYEF2_0.32 PAG1_0.46 PEX5_0.34 PTK2_0.50 RABGAP1_0.33 RAPGEF5_0.96 RNGTT_0.51 RRAS2_0.55 SCRN1_0.65 SNX22_0.50 SORL1_0.56 SPRED2_0.70 SSBP2_0.63…
ly1.enhancer.INTRONIC.BCL6-SMRT.DRE.807	2.18758e-21		ABLIM1_0.56 AFF2_0.64 ARHGEF37_0.23 ASAP1_0.41 AUTS2_0.75 BACH2_0.60 BCL2_0.77 BCL7A_0.49 BICD1_0.42 BMP7_0.88 CDK14_0.73 CHD7_0.28 DAAM1_0.62 DIP2C_0.34 DLG2_0.33 EBF1_0.57 EEPD1_0.73 EF5_0.25 ESR2_0.37 FBXW8_0.34 FOXO1_0.35 HRK_0.36 IQCD_0.70 ITPKB_0.43 KANK1_0.50 KIAA0355_0.32 LTBP1_0.56 LYPD6B_0.86 MAML3_0.45 MAP3K9_0.16 MAP4K4_0.39 MCTP2_0.38 MFHAS1_0.69 MGAT5_0.54 MGMT_0.51 MME_1.38 MSI2_0.…
c2.Crebbp.up_205	2.03714e-13		AFF2_0.644 BMP3_0.405 CA13_0.128 CD24_0.838 CYP39A1_0.611 EML6_0.582 G13_0.545 HGST_0.488 HRK_0.359 ICOSLG_0.479 IQCD_0.703 KCNK12_0.925 KCNMB3_0.624 LTBP1_0.560 MME_1.381 MSI2_0.579 PEG10_0.922 PHLPP1_0.405 SGCE_0.433 SLC25A27_0.602 SOX9_0.485 TDRD6_0.067 TMEM95_0.016 VGLL4_0.410 ZNF660_0.165 ZNF860_0.362
ly1.promoter.BCL6.all.3140	6.81817e-13		ABLIM1_0.563 ALOX5_0.511 ANKRD13A_0.469 ARID4A_0.314 ARID4B_0.279 AUTS2_0.752 BACH2_0.598 BAZ2B_0.502 BCL11A_0.439 BCL2_0.768 BCL6_0.666 BICD1_0.422 BMP3_0.405 BRWD1_0.522 CD22_0.645 CD24_0.838 CD79A_0.488 CD79B_0.588 CDK14_0.733 CHD7_0.283 CSPP1_0.312 DEF8_0.506 DLG2_0.329 DJC10_0.498 DNMT1_0.393 EBF1_0.567 EFCAB5_0.161 EF5_0.246 ELL3_0.885 ESR2_0.365 FAM81A_0.560 GGNBP2_0.305 HEMGN_0.343 HOXA5_…
Bcell_up_Ebert_cell_11	1.41972e-12		ALOX5_0.5113 ARID4A_0.3144 BACH2_0.5981 BCL11A_0.4392 BCL2_0.7678 BCL7A_0.4928 BLK_0.6571 CD79A_0.4884 CD79B_0.5879 CDK14_0.7331 CHD7_0.2829 CHD9_0.3260 CLIC4_0.4348 CNR1_0.9637 DEF8_0.5057 DMPK_0.2535 DJC10_0.4975 ELL3_0.8848 EPB41L2_0.4485 FADS3_0.6729 GNL1_0.0011 HRK_0.3590 ITSN2_0.4822 KIAA0355_0.3242 KLHL24_0.3834 LY86_0.6594 MAP3K9_0.1631 MAP4K4_0.3921 MGAT5_0.5390 NBEA_0.1353 NCOR1_0.4028 …
NB_GCB_Progression_All_Genes_RPKM_enhancer_gain_plus3_plus4	5.36198e-12		ANKRD13A_0.47 ASB13_0.86 B3GALTL_0.25 BRWD1_0.52 CMPK2_0.44 DAAM1_0.62 EEPD1_0.73 EML6_0.58 FGD6_0.51 HS2ST1_0.39 HSD17B12_0.48 KANK1_0.50 KCNK12_0.92 LMO2_0.68 LTBP1_0.56 MAPK10_0.88 METAP2_0.59 MFHAS1_0.69 MYO3B_0.27 NCOA7_0.36 OSBPL3_0.40 PXDNL_0.34 RAPGEF5_0.96 SLC1A1_0.40 SPAG16_0.43 SPRED2_0.70 TNKS_0.49 TOX_0.61 WDR19_0.24 ZNF608_0.59
NB_GCB_Progression_All_Genes_RPKM_plus10	5.36198e-12		ANKRD13A_0.47 ASB13_0.86 B3GALTL_0.25 BRWD1_0.52 CMPK2_0.44 DAAM1_0.62 EEPD1_0.73 EML6_0.58 FGD6_0.51 HS2ST1_0.39 HSD17B12_0.48 KANK1_0.50 KCNK12_0.92 LMO2_0.68 LTBP1_0.56 MAPK10_0.88 METAP2_0.59 MFHAS1_0.69 MYO3B_0.27 NCOA7_0.36 OSBPL3_0.40 PXDNL_0.34 RAPGEF5_0.96 SLC1A1_0.40 SPAG16_0.43 SPRED2_0.70 TNKS_0.49 TOX_0.61 WDR19_0.24 ZNF608_0.59
Pan_B_U133plus	5.36198e-12		ALOX5_0.51 BCL11A_0.44 BCL7A_0.49 BLK_0.66 CD22_0.65 CD24_0.84 CD79A_0.49 CD79B_0.59 DTX1_0.89 EBF1_0.57 ELL3_0.88 OSBPL10_0.54 PEG10_0.92 RALGPS2_0.46 STAP1_0.55 VPREB3_1.27 WASF1_0.41
NB_GCB_Progression_All_Genes_RPKM_plus5	1.02381e-10		AFF2_0.64 ANKRD13A_0.47 ASB13_0.86 AUTS2_0.75 BCL7A_0.49 BRWD1_0.52 CMPK2_0.44 DAAM1_0.62 DNER_0.39 GRIK1_0.11 HS2ST1_0.39 HSD17B12_0.48 ILDR1_0.30 ITSN2_0.48 KANK1_0.50 MEF2B_0.67 METAP2_0.59 MME_1.38 MYO1E_0.77 MYO3B_0.27 NEBL_0.24 NEK6_0.59 PXDNL_0.34 RGS20_0.20 RNFT2_0.36 SIPA1L3_0.32 SLC1A1_0.40 SOX9_0.49 SSBP3_0.39 ZBTB44_0.29
ly1.promoter.BCL6-BCOR.all.2142	2.88404e-10		ABLIM1_0.563 ALOX5_0.511 AUTS2_0.752 BACH2_0.598 BAZ2B_0.502 BCL11A_0.439 BCL2_0.768 BCL6_0.666 BMP3_0.405 BRWD1_0.522 CD22_0.645 CD24_0.838 CD79A_0.488 CD79B_0.588 CHD7_0.283 CSPP1_0.312 DEF8_0.506 DLG2_0.329 EBF1_0.567 EF5_0.246 ELL3_0.885 ESR2_0.365 GGNBP2_0.305 HOXA5_0.282 HS2ST1_0.388 HSBP1L1_0.603 KCNH8_0.212 KCNK4_0.027 KIAA1377_0.151 KIAA1429_0.385 KLHL24_0.383 KLHL5_0.325 LOC285696_0.114…
GC_B_cell_BLhigh_DLBCLlow	5.05217e-10		AFF2_0.64 BCL7A_0.49 BMP7_0.88 CYP39A1_0.61 DSE1_0.53 MME_1.38 PEG10_0.92 PEX5_0.34 RNFT2_0.36 SSBP2_0.63 VPREB3_1.27
ly1.enhancer.DISTAL.BCL6-SMRT.DRE.553	5.57878e-10		ACYP2_0.360 ARID1B_0.289 ASAP1_0.410 BACH2_0.598 BCL11A_0.439 BCL6_0.666 CD1A_0.220 CD22_0.645 CHD7_0.283 CNR1_0.964 CRB2_0.131 DJC5B_0.692 EBF1_0.567 EF5_0.246 FAM81A_0.560 GLI3_0.236 MCTP2_0.382 MFHAS1_0.691 MGAT5_0.539 MIR548H3_0.995 MYO3B_0.266 PAG1_0.460 PITX1_0.667 PLEKHF2_0.606 PTK2_0.505 SLC35E3_0.334 SPAG16_0.426 SPO11_0.031 SPRED2_0.697 SYPL1_0.409 TMEM156_0.411 TOX_0.613 TP53INP1_0.577…
GCB_gt_ABC_Affy	2.35398e-09		BCL6_0.67 CSTB_0.37 ITPKB_0.43 LMO2_0.68 MME_1.38 MYBL1_0.75 VCL_0.59
GCB_gt_ABC_LC	2.35398e-09		BCL6_0.67 ITPKB_0.43 LMO2_0.68 MME_1.38 MYBL1_0.75 NEK6_0.59 SERPI9_1.85
Resting_blood_B_cell_GNF	3.2782e-09		BLK_0.66 CD22_0.65 CD24_0.84 CD79A_0.49 CD79B_0.59 EBF1_0.57 FADS3_0.67 HRK_0.36 OSBPL10_0.54 STAG3_0.70 STAP1_0.55 SWAP70_0.49 TPD52_0.57 VPREB3_1.27
CTCF_ly1_prom	3.78263e-09		ANKRD36_0.312 ANKRD36B_0.247 ARID1B_0.289 ARID4B_0.279 B3GALTL_0.247 BACH2_0.598 BCL11A_0.439 BCL2_0.768 BCL6_0.666 BICD1_0.422 BPTF_0.577 BRWD1_0.522 CA13_0.128 CCDC144B_0.268 CCDC85A_0.980 CD22_0.645 CD24_0.838 CD79A_0.488 CD79B_0.588 CDK14_0.733 CDK3_0.205 CHD3_0.347 CHD9_0.326 CLGN_0.470 CLIC4_0.435 CMPK2_0.444 CNR1_0.964 CRB2_0.131 CSPP1_0.312 DAAM1_0.624 DEF8_0.506 DHRS1_0.280 DMPK_0.254 DS…
Blimp_Bcell_repressed	1.87388e-08		ALOX5_0.51 BCL6_0.67 CD22_0.65 CD24_0.84 CD79A_0.49 EBF1_0.57 MYBL1_0.75 MYO1E_0.77 PAG1_0.46 PCDHGC3_0.82 STAP1_0.55 VPREB3_1.27
GCB.promoter.BCL6-BCOR.all.5451	2.66953e-08		ABLIM1_0.563 AMZ2P1_0.313 ANKRD13A_0.469 ARID1B_0.289 ARID4A_0.314 ARID4B_0.279 ARL2BP_0.436 B3GALTL_0.247 BACH2_0.598 BCL11A_0.439 BCL6_0.666 BCL7A_0.493 BICD1_0.422 BLK_0.657 BPTF_0.577 BRWD1_0.522 CCDC11_0.138 CCDC122_0.295 CD22_0.645 CD79A_0.488 CD79B_0.588 CDK14_0.733 CLIC4_0.435 CMPK2_0.444 CSPP1_0.312 DAAM1_0.624 DEF8_0.506 DLG2_0.329 DJC10_0.498 DNMT1_0.393 EBF1_0.567 EEPD1_0.732 EFCAB5_0…
c1.Crebbp.up_198	4.14213e-08		BMP3_0.40 BMP7_0.88 CCDC85A_0.98 CCL28_0.41 DNER_0.39 EML6_0.58 ENPP3_0.69 H1FX-AS1_0.17 HRK_0.36 LTBP1_0.56 NKX6-3_0.32 PFN2_0.72 PODXL2_0.58 SGCE_0.43 SLC30A4_0.45 SLMO1_0.24 SPRED2_0.70 TP53INP1_0.58 ZNF608_0.59
GCB.promoter.BCL6.all.5541	4.45596e-08		ABLIM1_0.563 AMZ2P1_0.313 ANKRD13A_0.469 ARID1B_0.289 ARID4A_0.314 ARID4B_0.279 ARL2BP_0.436 B3GALTL_0.247 BACH2_0.598 BCL11A_0.439 BCL6_0.666 BCL7A_0.493 BICD1_0.422 BLK_0.657 BPTF_0.577 BRWD1_0.522 CCDC11_0.138 CCDC122_0.295 CD22_0.645 CD79A_0.488 CD79B_0.588 CDK14_0.733 CLIC4_0.435 CMPK2_0.444 CSPP1_0.312 DAAM1_0.624 DEF8_0.506 DLG2_0.329 DJC10_0.498 DNMT1_0.393 EBF1_0.567 EEPD1_0.732 EFCAB5_0…
ly1.promoter.BCL6-BCOR.only.1783	8.06211e-08		ABLIM1_0.563 ALOX5_0.511 AUTS2_0.752 BACH2_0.598 BAZ2B_0.502 BCL11A_0.439 BCL2_0.768 BMP3_0.405 BRWD1_0.522 CD24_0.838 CHD7_0.283 CSPP1_0.312 DEF8_0.506 EBF1_0.567 ELL3_0.885 ESR2_0.365 HOXA5_0.282 HS2ST1_0.388 HSBP1L1_0.603 KCNK4_0.027 KIAA1377_0.151 KIAA1429_0.385 KLHL24_0.383 LOC285696_0.114 LRRC4_0.468 LTBP1_0.560 LY86_0.659 MAML3_0.454 MC1R_0.200 MED12L_0.300 MYBL1_0.755 NEIL1_0.778 NUDT13_0…
BACH2_target_ChIPseq	3.82549e-07		ABLIM1_0.5631 ACYP2_0.3604 AFF2_0.6436 ALOX5_0.5113 ANKRD13A_0.4694 ARID1B_0.2893 ARL2BP_0.4364 ATXN2_0.2825 AUTS2_0.7517 BACH2_0.5981 BCL6_0.6658 BICD1_0.4224 BLK_0.6571 BMP3_0.4047 BMP7_0.8799 CD22_0.6451 CD79A_0.4884 CHD3_0.3473 CHD9_0.3260 CLGN_0.4704 CLIC4_0.4348 CLSPN_0.2807 CMPK2_0.4436 CSTB_0.3725 CYP39A1_0.6114 DAAM1_0.6239 DIP2C_0.3429 DLG2_0.3294 DJC10_0.4975 DNMT1_0.3930 DTX1_0.8855 E…
shCrebbp.up_995	4.7927e-07		ABLIM1_0.56 ARID4B_0.28 ASAP1_0.41 BACH2_0.60 BAZ2B_0.50 BCL7A_0.49 BPTF_0.58 BRWD1_0.52 CHD4_0.33 CHD7_0.28 CHD9_0.33 CRB2_0.13 CSPP1_0.31 FADS3_0.67 FAM208B_0.42 FAM221A_0.34 HERC2_0.20 ITPKB_0.43 ITSN2_0.48 KANSL1L_0.23 KDM5A_0.21 KMT2C_0.29 MFHAS1_0.69 MYH10_0.28 MYO9A_0.36 NCOR1_0.40 PHF14_0.26 PHLPP1_0.41 PLAG1_0.25 RABGAP1_0.33 RALGPS2_0.46 RSF1_0.30 SNX29_0.40 SORL1_0.56 STRBP_0.67 TAF3_0…
GC_B_cell_BLlow_DLBCLhigh	2.1178e-06		FGD6_0.51 ILDR1_0.30 LMO2_0.68 MAML3_0.45 RRAS2_0.55 SERPI9_1.85 SLC1A1_0.40 SPAG16_0.43 TOX_0.61
EZH2_mut_up_124_Ash_FL	3.73777e-06		CD22_0.65 ILDR1_0.30 ITPKB_0.43 KCNMB3_0.62 LOC728613_0.26 NCOR1_0.40 PTK2_0.50 SIPA1L3_0.32 SNX29_0.40 SORL1_0.56 STAP1_0.55 TOX_0.61 TTC9_0.49
CD40_downregulated_Burkitt_lymphoma	5.41513e-06		BCL6_0.67 BMP7_0.88 CNR1_0.96 FAM106A_0.11 MEF2B_0.67 NCOR1_0.40 NPAS1_0.20 RAPGEF5_0.96 TTC9_0.49 TUBB3_0.77
c2.Ep300.up_32	1.31639e-05		BICD1_0.42 DPRXP4_0.24 PCDHGA6_0.23 PCDHGB1_0.19 PCDHGB2_0.30 PCDHGB3_0.25 RASL11A_1.30
IKZF1_CB_all	2.44086e-05		AMZ2P1_0.31 BICD1_0.42 CCDC122_0.30 CD79A_0.49 CD79B_0.59 CRB2_0.13 DAAM1_0.62 DLG2_0.33 ELL3_0.88 ESR2_0.37 FAM81A_0.56 FOXO1_0.35 GGNBP2_0.31 HCN3_0.17 ICOSLG_0.48 ITPKB_0.43 KDM5A_0.21 LMO2_0.68 MAML3_0.45 MARCKSL1_0.92 MEF2B_0.67 METAP2_0.59 MSI2_0.58 MYBL1_0.75 MYO1E_0.77 NCOR1_0.40 NEIL1_0.78 NEK6_0.59 OSBPL3_0.40 PHLPP1_0.41 PTK2_0.50 RSF1_0.30 RUSC1_0.24 SERPI9_1.85 SIPA1L3_0.32 SPRED2_0.…
shEp300.up_783	5.16408e-05		ARID4B_0.28 ASAP1_0.41 BACH2_0.60 BAZ2B_0.50 BBX_0.28 BCL7A_0.49 BICD1_0.42 BPTF_0.58 BRWD1_0.52 CHD4_0.33 CHD7_0.28 CHD9_0.33 CSPP1_0.31 DJC10_0.50 EBF1_0.57 EML6_0.58 FAM208B_0.42 FOXO1_0.35 HERC2_0.20 KDM5A_0.21 KMT2C_0.29 LRRC4_0.47 MYBL1_0.75 MYO9A_0.36 NCOR1_0.40 NEIL1_0.78 RABGAP1_0.33 RSF1_0.30 STRBP_0.67 TAF3_0.31 TNRC6A_0.21 USP2_0.57 ZBTB44_0.29
GCB.promoter.BCL6-BCOR.only.4145	9.66766e-05		ANKRD13A_0.469 ARID1B_0.289 ARID4A_0.314 ARID4B_0.279 ARL2BP_0.436 B3GALTL_0.247 BACH2_0.598 BCL11A_0.439 BCL7A_0.493 BICD1_0.422 BPTF_0.577 CCDC122_0.295 CMPK2_0.444 CSPP1_0.312 DAAM1_0.624 DLG2_0.329 DNMT1_0.393 EBF1_0.567 EEPD1_0.732 EFCAB5_0.161 EML6_0.582 ESR2_0.365 FGD6_0.508 FOXO1_0.352 G13_0.545 GXYLT1_0.286 HDAC1_0.512 HGST_0.488 HMGN5_0.519 HRK_0.359 HS2ST1_0.388 ICOSLG_0.479 ILDR1_0.30…
Myeloma_CD-2_subgroup_up	0.000116984		CD79A_0.49 CNR1_0.96 DTX1_0.89 ITPKB_0.43 RNGTT_0.51 VPREB3_1.27 ZNF608_0.59
Leucine_starve_up	0.000121699		BCL7A_0.49 BMP7_0.88 CAMK1_0.46 CD22_0.65 CLIC4_0.43 DAAM1_0.62 GCHFR_0.49 KANK1_0.50 MEF2B_0.67 NCOR1_0.40 SWAP70_0.49
P300_ly1_prom	0.000277082		ABLIM1_0.56 ANKRD13A_0.47 AUTS2_0.75 B3GALTL_0.25 BCL6_0.67 BRWD1_0.52 CD22_0.65 CD24_0.84 CD79A_0.49 CD79B_0.59 CDK14_0.73 CSTB_0.37 DLG2_0.33 DNMT1_0.39 EFCAB5_0.16 ELL3_0.88 GGNBP2_0.31 HDAC1_0.51 KANK1_0.50 KDM5A_0.21 KLHL5_0.32 LOC285696_0.11 LY86_0.66 MAML3_0.45 MED12L_0.30 MTA3_0.61 NEIL1_0.78 PFKM_0.32 PLAG1_0.25 PNN_0.45 PSIP1_0.48 RAB3A_0.26 SNX22_0.50 SSBP2_0.63 STRBP_0.67 SYNE2_0.33 T…
MCL_gt_SLL_DLBCL	0.000684928		ALOX5_0.51 CD24_0.84 LY86_0.66 MFHAS1_0.69 RNGTT_0.51
Intron_loss.ATAC.reads_CREBBP.KD	0.000701233		AFF2_0.64 BCL2_0.77 DLG2_0.33 DTX1_0.89 EF5_0.25 EPB41L2_0.45 KCNJ1_0.30 LYPD6B_0.86 MCTP2_0.38 MSI2_0.58 OSBPL3_0.40 RNFT2_0.36 RNGTT_0.51 SIPA1L3_0.32 SNX30_0.36 SORL1_0.56
Glutamine_starve_up	0.00200816		ARL2BP_0.44 BCL7A_0.49 BLK_0.66 BMP7_0.88 CAMK1_0.46 CLIC4_0.43 DAAM1_0.62 FOXO1_0.35 GCHFR_0.49 KIAA0355_0.32 LY86_0.66 MEF2B_0.67 NCOR1_0.40 PEX5_0.34 SMAD5_0.38
GMP_down_Ebert_cell_11	0.00292327		IPW_0.24 LINC00342_0.27 NBEA_0.14 PHF14_0.26 SOD1_0.44 UPF2_0.35
CREBBP_mut_down_278_Ash_FL	0.00336902		BCL2_0.77 CLIC4_0.43 HTR3A_1.04 HYPK_0.43 ITPKB_0.43 MGMT_0.51 OSBPL3_0.40 RRAS2_0.55 S1PR2_0.79 THOC2_0.26 TOX_0.61 TUBB2A_0.46 TUBB3_0.77 WEE1_0.48
CTCF_CB_prom	0.00336902		ANKRD36_0.312 ANKRD36B_0.247 B3GALTL_0.247 BACH2_0.598 BCL2_0.768 BCL6_0.666 BPTF_0.577 CCDC144A_0.080 CCDC144B_0.268 CCDC85A_0.980 CDK14_0.733 CDK3_0.205 CHD9_0.326 CLGN_0.470 CRB2_0.131 CSPP1_0.312 DEF8_0.506 DMPK_0.254 DSE1_0.526 DNER_0.389 EFCAB5_0.161 ELL3_0.885 ESR2_0.365 FOXO1_0.352 GH1_0.307 KCNH8_0.212 LOC100128164_0.227 LOC284632_0.237 LOC285696_0.114 LRP11_0.261 LRRC37A3_0.138 LTBP1_0.…
IKZF1_CB_prom	0.00352562		AMZ2P1_0.31 BICD1_0.42 CCDC122_0.30 CD79A_0.49 DAAM1_0.62 ELL3_0.88 ESR2_0.37 GGNBP2_0.31 HCN3_0.17 ICOSLG_0.48 KDM5A_0.21 LMO2_0.68 MAML3_0.45 MARCKSL1_0.92 METAP2_0.59 MYBL1_0.75 NCOR1_0.40 OSBPL3_0.40 PHLPP1_0.41 RSF1_0.30 RUSC1_0.24 SERPI9_1.85 SPRED2_0.70 SSBP2_0.63 TOB2_0.39 UPF2_0.35 VPREB3_1.27
NB_GCB_Progression_All_Genes_RPKM_minus10	0.00604897		ARID1B_0.29 BACH2_0.60 BCL2_0.77 BLK_0.66 FOXO1_0.35 MGAT5_0.54 MSI2_0.58
GC_T_helper_up2x_Chtanova	0.00632991		AACS_0.37 ANKRD13A_0.47 ARID1B_0.29 BAZ2B_0.50 BCL6_0.67 DIP2C_0.34 ITPKB_0.43 KLHL24_0.38 MGAT5_0.54 MSI2_0.58 PEG10_0.92 PLAG1_0.25 SGCE_0.43 STS_0.43 SYPL1_0.41 TOX_0.61 TP53INP1_0.58 USP11_0.34
Enhancer_loss.ATAC.reads_CREBBP.KD	0.00749207		AFF2_0.644 ARID1B_0.289 BCL2_0.768 DAAM1_0.624 DLG2_0.329 DJC5B_0.692 DTX1_0.886 EF5_0.246 EML6_0.582 EPB41L2_0.448 KAT6B_0.329 KCNJ1_0.299 KIAA0355_0.324 LINC00487_0.822 LOC100130451_0.014 LOC440704_0.069 LYPD6B_0.859 MCTP2_0.382 MME_1.381 MSI2_0.579 OSBPL3_0.401 PHF14_0.261 RNFT2_0.364 RNGTT_0.514 SIPA1L3_0.320 SNX30_0.359 SORL1_0.563 SSBP2_0.634 SYPL1_0.409 USP6NL_0.466 VPREB1_0.320
ly1.promoter.BCL6-SMRT.only.93	0.00749207		CDK14_0.73 DJC10_0.50 EFCAB5_0.16 HEMGN_0.34 STAP1_0.55 SYNE2_0.33 TPD52_0.57
Thymic_SP_CD4+Tcell_gt_Blood_CD4+Tcell	0.00835763		AUTS2_0.75 BCL11A_0.44 CD1A_0.22 CMPK2_0.44 MAML3_0.45 SPRED2_0.70 TOX_0.61
EZH2_mut_down_347_Ash_FL	0.00867664		AACS_0.37 BACH2_0.60 BMP7_0.88 CD24_0.84 CD79B_0.59 FOXO1_0.35 HRK_0.36 MME_1.38 NBEA_0.14 PEX5_0.34 RALGPS2_0.46 SGCE_0.43 SLC35E3_0.33 SMAD5_0.38 TCL6_0.34
KMT2C_mut_down_214_Ash_FL	0.00912697		ACYP2_0.36 ARID1B_0.29 DEF8_0.51 ESR2_0.37 FGD6_0.51 KIF3A_0.25 MSI2_0.58 NEIL1_0.78 SSBP2_0.63 SYNE2_0.33 ZNF326_0.26
GC_B_DLBCL_survival	0.00912697		BCL6_0.67 SERPI9_1.85
HSC_120_Dick_NatMed_11	0.00931806		BCL11A_0.4392 CRHBP_0.3536 FOXO1_0.3524 GNL1_0.0011 HOXA5_0.2822 ITSN2_0.4822 MSI2_0.5788 PTK2_0.5049
NK_down_Ebert_cell_11	0.00951544		BCL11A_0.44 BCL7A_0.49 CLIC4_0.43 HSD17B12_0.48 KANK1_0.50 LTBP1_0.56 NBEA_0.14 PFKM_0.32 PLAG1_0.25 PTK2_0.50 SYPL1_0.41 WASF1_0.41
MEIS1_target_ChIPseq_Ebert_Cell_11	0.0127052		ASAP1_0.41 BACH2_0.60 BAZ2B_0.50 BCL11A_0.44 BLK_0.66 G13_0.54 GRIK1_0.11 KDM5A_0.21 MAP4K4_0.39 MFHAS1_0.69 OSBPL3_0.40 PDGFD_0.57 PTK2_0.50 RRAS2_0.55 SORL1_0.56 SPAG16_0.43 SSBP2_0.63 SSBP3_0.39 SWAP70_0.49 TOX_0.61
BCL6_target_ChIPseq	0.0137937		ABLIM1_0.563 ALOX5_0.511 ANKRD13A_0.469 ARID4A_0.314 ARID4B_0.279 AUTS2_0.752 BACH2_0.598 BAZ2B_0.502 BCL11A_0.439 BCL2_0.768 BCL6_0.666 BICD1_0.422 BMP3_0.405 BRWD1_0.522 CD22_0.645 CD24_0.838 CD79A_0.488 CD79B_0.588 CDK14_0.733 CHD7_0.283 CSPP1_0.312 DEF8_0.506 DLG2_0.329 DJC10_0.498 DNMT1_0.393 EBF1_0.567 EFCAB5_0.161 EF5_0.246 ELL3_0.885 ESR2_0.365 FAM81A_0.560 GGNBP2_0.305 HEMGN_0.343 HOXA5_…
HSC_up_Ebert_cell_11	0.0242913		ASB13_0.864 BCL11A_0.439 BICD1_0.422 CHD9_0.326 CLGN_0.470 CRHBP_0.354 HOXA2_0.089 HOXA5_0.282 HSD17B12_0.480 JUP_0.702 KANK1_0.503 MGMT_0.506 MYH10_0.283 NBEA_0.135 PDGFD_0.566 PFN2_0.718 PHLPP1_0.405 PLAG1_0.252 RABGAP1_0.326 SPAG16_0.426 SPRED2_0.697 SSBP2_0.634 SYPL1_0.409 TOX_0.613 TRPV1_0.204 VGLL4_0.410 WASF1_0.407
Tcell_up_Ebert_cell_11	0.0244946		ABLIM1_0.5631 ANKRD36B_0.2466 ARID4A_0.3144 ARID4B_0.2786 BACH2_0.5981 BCL2_0.7678 BPTF_0.5767 BRWD1_0.5219 CHD3_0.3473 CHD7_0.2829 CLSTN1_0.3304 CSPP1_0.3123 DHRS1_0.2798 DHX16_0.0019 DIP2C_0.3429 DMPK_0.2535 DNMT1_0.3930 ESR2_0.3654 FOXO1_0.3524 GGNBP2_0.3052 IPW_0.2351 ITPKB_0.4257 ITSN2_0.4822 KAT6B_0.3288 KDM5A_0.2130 KIAA0355_0.3242 KIF3A_0.2451 KLHL24_0.3834 LINC00342_0.2679 MAP3K9_0.1631 …
HSC_e-ERY_up_Ebert_cell_11	0.0300062		ANKRD26_0.29 ASB13_0.86 ATXN2_0.28 BAZ2B_0.50 BCL11A_0.44 BCL7A_0.49 BICD1_0.42 CHD9_0.33 CLGN_0.47 CRHBP_0.35 HERC2_0.20 HMGN1_0.49 HMGN5_0.52 HOXA5_0.28 HS2ST1_0.39 HSD17B12_0.48 JUP_0.70 KANK1_0.50 LMO2_0.68 LTBP1_0.56 MAGED1_0.56 MARCKSL1_0.92 MCTP2_0.38 MGMT_0.51 MYH10_0.28 NBEA_0.14 PDGFD_0.57 PFKM_0.32 PHLPP1_0.41 PLAG1_0.25 PNN_0.45 RNF20_0.23 SMAD5_0.38 SOD1_0.44 SPAG16_0.43 SPRED2_0.70 …
B_cell_Node1500	0.0429842		BLK_0.66 CD79A_0.49
c1.Ep300.up_381	0.0431037		ARL2BP_0.44 CD24_0.84 DSE1L2_0.21 ENPP3_0.69 EPB41L2_0.45 HHLA3_0.42 HS2ST1_0.39 KCNK12_0.92 LTBP1_0.56 PCDHGA6_0.23 SLMO1_0.24 SNORA78_0.76 TOX_0.61 TTC9_0.49
ENHANCER ACTIVITY LOSS GENES IN GCB		2.4e-06	BCL2 CDK14 CHD7 JUP LY86 LY86-AS1 MGAT5	ABCB9 ACSM1 CAMK1D CCDC50 CD44 CREB3L2 CYSLTR1 DNMT3A DSE FAM46C FGR GBP2 IQGAP2 IRF4 LIMD1 MTSS1 P2RY10 PLAC8 RSE6 ZBED2
HSA04612_ANTIGEN_PROCESSING_AND_PRESENTATION		0.019115		PSME1 HLA-DPB1 KLRD1 HLA-C LGMN HLA-B CD4 HLA-DRB5 CTSS PSME2 HLA-A HLA-DRB4 CTSB HLA-DRB1 CD8A CD8B
